# Supplementary material for: Towards a molecular mechanism underlying mitochondrial protein import through the TOM and TIM23 complexes
Source: eLife. 2022 Jun 8;11:e75426. doi: 10.7554/eLife.75426 (PMC9255969; doi:10.7554/eLife.75426)
Supplement: Figure 1—figure supplement 1—source data 2. [file elife-75426-fig1-figsupp1-data2.xlsx]

## Sheet: primary data
time	mitos 1 19.5.21	mitos 2 19.5.21	mitos 3 19.5.21	mitos 2 3.7.20	mitos 1 15.2.21	mitos 2 15.2.21	mitos 3 15.2.21	mitos 2 25.7.20
0	324	466	304	963	2586	2695	2335	2457
0.1	1188	1738	1087	3611	6482	8072	6145	6769
0.2	3279	4542	2871	7925	14482	17360	13187	13973
0.3	5849	7657	4658	13070	25421	30665	22638	23219
0.4	9136	12058	7968	18669	38808	44710	34014	35316
0.5	12867	17354	11042	24915	52358	61220	46559	47725
0.6	17176	22273	14868	31006	66759	77331	59544	61533
0.7	21466	27868	18512	38120	82853	94809	74069	73026
0.8	26236	32873	22668	42969	99046	111611	87186	88849
0.9	30995	39335	26593	50169	113746	127241	100440	100331
1	36223	45270	30906	56410	127975	143405	114308	114551
1.1	40171	51749	34515	62300	141723	158204	127106	126361
1.2	45210	57024	39179	67589	155441	173332	138876	136981
1.3	49770	62083	43048	72965	169726	184778	150360	148406
1.4	54861	67120	48042	78172	181967	199789	162480	159123
1.5	60037	72649	51310	83426	195029	211680	170987	169754
1.6	63577	78152	55293	88171	205359	222062	183909	179214
1.7	67461	83454	59057	92648	216745	234520	192438	189530
1.8	71924	87879	62761	96998	226145	242353	201645	197754
1.9	76081	91995	65804	99945	235196	254358	208566	206563
2	80414	95665	70225	104230	245854	261844	217729	212517
2.1	83737	99762	73029	107445	254529	270823	226164	219060
2.2	87186	102765	76373	112045	264000	277194	232331	228208
2.3	90103	107466	79005	115514	270246	288126	240966	233815
2.4	94111	110774	81570	118676	278329	293439	245739	242165
2.5	96676	113572	84477	120949	285124	300546	252593	248046
2.6	99507	117919	86592	125018	293364	306401	258734	252488
2.7	103498	120665	90065	127267	297702	314424	264761	259595
2.8	105610	122740	92388	130048	306418	317824	270739	265165
2.9	108056	125165	94559	133795	313093	323780	276645	269785
3	110968	128932	96308	135452	317031	328923	281452	272947
3.1	114259	130936	98685	137989	324403	336258	284720	277668
3.2	116108	133146	102080	139823	328093	341271	290203	282039
3.3	118765	135591	104285	142116	333483	344812	294128	286755
3.4	120853	137746	105460	144197	337055	349789	298464	290887
3.5	122194	140028	106763	146282	344064	354804	302204	294552
3.6	125448	143252	109328	148614	346362	357745	305763	298456
3.7	126556	144385	110586	149223	351112	361520	309529	302414
3.8	129023	147051	111651	152621	354702	365816	312845	305402
3.9	130691	148033	113625	154768	360270	372384	317370	309071
4	132986	149516	115240	154619	363273	373793	319835	310821
4.1	134525	151607	117879	157951	366040	377241	323235	312796
4.2	135214	152618	118838	159073	371368	380505	326488	317021
4.3	137912	154693	120501	160391	373081	381624	328151	321244
4.4	139918	156016	122079	161334	378183	386282	331815	323464
4.5	141782	157913	122291	161938	379209	391243	334774	326839
4.6	140652	158112	124193	164644	381841	392105	337716	327493
4.7	144365	159713	125708	166198	386302	396687	339964	330635
4.8	145462	161081	126413	166492	385811	397079	340949	333039
4.9	146289	163208	128518	167909	391256	400270	344822	334681
5	147102	164066	129283	168014	393988	403127	346862	337083
5.1	148845	164863	130913	170442	395533	403708	348762	338041
5.2	149114	167315	131766	170235	397403	406765	348905	339208
5.3	151151	166786	132133	172123	399540	409197	352225	343444
5.4	152018	168276	133929	173358	402751	411760	355053	344531
5.5	153550	169367	134523	173541	403926	413623	355886	345651
5.6	155384	169808	134772	174545	406594	415328	356617	348320
5.7	155914	171116	137675	175843	408801	414857	359356	350575
5.8	156047	173021	137801	177004	410730	417865	360811	350043
5.9	158142	173279	139593	177177	413163	419723	361574	350159
6	159652	174547	138967	177708	414661	420978	363869	353898
6.1	160269	175030	140636	177902	416412	422270	365390	354315
6.2	161563	176493	141586	180503	415454	425082	367001	353879
6.3	161099	176957	140669	179893	418792	425318	368302	356090
6.4	162346	176586	142726	181300	420567	427638	367968	358173
6.5	162130	178276	142959	181524	419162	427082	369553	357072
6.6	163714	178948	143746	181887	422259	427135	369654	360720
6.7	164805	180082	144548	182934	422891	428920	371926	360391
6.8	165951	180881	144885	183415	425469	433841	374168	361875
6.9	166490	180786	145937	184878	428123	433420	373625	362397
7	165804	181344	145997	184214	427964	433209	374740	362589
7.1	167574	181911	146471	186379	431001	434383	375109	364239
7.2	168113	182937	147654	186216	429433	433666	376986	366191
7.3	168719	182577	147346	183869	429237	436642	378254	365895
7.4	168982	184862	147312	187497	433142	438916	378108	367334
7.5	169595	183290	149032	188052	432436	436844	378541	367184
7.6	171205	185078	149635	187822	433759	439924	380150	369494
7.7	170475	185588	149782	188120	436648	438931	379983	369875
7.8	171221	185980	149514	187962	435404	439109	382154	371253
7.9	170526	186946	150619	188905	436141	439784	380198	369733
8	172230	186395	151127	190157	435034	441531	382774	370154
8.1	173164	187535	152745	190361	435944	442272	383620	370844
8.2	172861	186590	152733	190541	437492	443060	383500	371493
8.3	172771	186733	152388	189702	438422	442861	385666	372949
8.4	173441	188677	153934	190478	438345	442917	383727	371072
8.5	174049	187967	153512	191252	438566	444821	384930	373832
8.6	174843	188551	153656	192735	440267	443709	385211	372778
8.7	175586	187924	154182	190297	437766	444306	384057	373533
8.8	174939	189042	154396	192027	438911	445607	386715	374711
8.9	174998	191075	155426	191965	440077	447411	387030	373374
9	175252	188926	154732	191721	440674	447124	388034	375594
9.1	176464	189484	155619	192425	441857	446878	387659	375899
9.2	177100	189793	156239	193294	441275	448114	386943	374590
9.3	176456	191258	155775	193832	442174	449330	387824	375128
9.4	177300	191451	155669	194393	442869	447580	387313	375527
9.5	178573	191634	156944	192863	444123	447515	388972	376668
9.6	176830	192335	156532	194165	444544	447651	390623	375793
9.7	176958	190442	156440	194477	443467	447633	388582	375880
9.8	177612	191782	157051	195722	443647	449224	390068	375951
9.9	177060	192584	157416	195075	443646	449606	389172	374428
10	178416	191036	156173	195319	445909	450636	389174	376492
10.1	178838	191917	157986	195155	443620	449135	388775	376157
10.2	178640	191339	157965	195126	444859	449371	389807	375578
10.3	178265	191579	157970	195772	445894	449064	389826	375654
10.4	179448	191475	157048	196034	444776	449452	391002	374264
10.5	179146	192009	158417	196122	445184	449376	389406	375961
10.6	178468	192380	158357	196024	442787	451123	389581	376806
10.7	178446	192709	158587	196981	445185	449744	389696	375950
10.8	179583	191399	158789	196490	443294	448846	391148	376140
10.9	178668	193565	158760	196406	445581	449914	389077	377068
11	180223	193097	158547	197104	444827	449521	390060	376800
11.1	179825	192419	158703	195732	445168	451631	388381	375222
11.2	180163	193080	159664	196640	444901	450651	391018	375918
11.3	180549	192581	159042	198600	442555	449298	391736	375028
11.4	181157	193351	159812	197629	445825	448052	389114	375682
11.5	180875	192548	159224	197371	443246	447888	390658	376285
11.6	180186	193143	158452	197385	442393	448687	390279	375651
11.7	181026	192141	160254	198167	443061	449818	389166	376902
11.8	180092	191765	160934	197079	444361	452139	389853	375685
11.9	181231	193396	160111	199170	443885	448632	388943	377068
12	179882	192094	160412	196579	443983	451590	389818	375452
12.1	180131	192799	160307	197313	444172	451194	390681	375864
12.2	179284	192915	159522	197863	442433	448903	388063	374656
12.3	181058	192526	158931	197409	443469	449023	387431	374853
12.4	179742	194183	159521	198248	444510	450653	387790	374405
12.5	181588	192549	160077	197196	443015	449255	388856	372801
12.6	180284	191833	160479	197952	441484	448984	388514	375001
12.7	180490	193578	159695	197586	441922	448439	390510	374481
12.8	179702	192489	160836	199586	443552	447858	388310	373359
12.9	180522	193487	159706	198067	441192	447541	388932	375173
13	181107	192072	159920	198841	441831	447122	387059	374037
13.1	181069	193977	162011	198572	440986	446986	388691	373714
13.2	180875	192401	160944	198965	441390	449661	389096	374634
13.3	180499	192751	160856	198598	440101	444697	384912	372816
13.4	180232	192589	161390	198046	440310	446951	385338	374289
13.5	179397	192112	160535	198220	441152	444421	386398	372255
13.6	180940	191808	160672	198315	441539	446579	384824	372864
13.7	180490	191793	160087	199559	439912	444841	386555	373529
13.8	180371	191859	160005	197929	441259	446584	386071	372936
13.9	180469	191784	160546	198354	439363	444693	386382	371898
14	181649	191924	160311	198067	438326	445006	386827	372356
14.1	180559	192598	159803	198299	436697	445008	386011	372189
14.2	179823	192096	159104	198467	439303	444440	385543	370779
14.3	180102	190686	160451	197531	438937	444710	385856	370291
14.4	180115	191802	161915	199399	437888	444223	385509	370489
14.5	179055	190724	159074	197838	437411	445470	383511	370083
14.6	180540	190710	159439	200088	437970	444073	385897	369414
14.7	179253	191187	159434	197778	437577	443324	383506	370174
14.8	179198	190993	161300	197597	437465	442818	382892	368729
14.9	179785	190430	159984	198044	433247	443376	382247	370350
15	179970	191495	159602	197351	435018	442934	383048	367835
15.1	180763	190652	160242	196837	435790	443649	383290	369082
15.2	178490	190856	160180	198192	434475	444051	382173	367977
15.3	180243	189747	160558	198267	435159	439918	380136	368251
15.4	178964	190410	159946	198293	433948	441559	382756	368490
15.5	179593	190342	159744	198261	433315	442076	380755	367347
15.6	179530	190478	159978	197806	434302	441876	380072	365796
15.7	179166	189371	160237	197057	433798	441701	380298	366306
15.8	179568	191474	160208	196669	433475	439429	380776	367485
15.9	179138	189119	159988	199134	431671	440063	381014	366455
16	179739	189652	159314	197883	432130	438494	379891	366007
16.1	177505	189520	159158	197006	430246	439534	379715	365795
16.2	178114	189080	159541	197056	432104	437761	379106	364626
16.3	178567	188816	159703	197297	429251	437507	377737	364872
16.4	178641	189718	158634	196955	433650	437127	378322	364583
16.5	178238	190882	159036	197998	429738	438365	376766	363759
16.6	178396	188056	159055	196168	432126	437604	376568	362672
16.7	177589	188559	158225	196822	430681	435663	379129	364426
16.8	176788	187720	159411	196947	428217	435734	377224	361903
16.9	179367	188635	158718	197125	427342	437357	376942	361155
17	177971	187512	158968	197664	428192	433756	375668	363613
17.1	179227	187512	157904	196348	426835	435863	377013	361889
17.2	177488	187309	157931	197093	428087	436581	373638	362313
17.3	177344	188884	158849	196111	425887	432710	374260	361780
17.4	177433	186591	158697	196165	426283	433765	374793	360940
17.5	177103	187709	158000	195543	426969	433163	373599	361878
17.6	176808	186720	157987	196789	425763	434041	373249	359512
17.7	178683	186781	158872	197120	425058	433169	374803	360417
17.8	178929	186698	158198	196494	423361	432106	372199	359507
17.9	176576	185877	158250	195744	423897	430819	372582	357538
18	176751	185513	158640	197067	423628	430974	371456	358860
18.1	176303	186453	159034	196086	422417	432498	371510	358712
18.2	177268	186377	156833	195351	423896	429221	372460	357868
18.3	176787	185978	156809	195590	423514	429963	371424	359044
18.4	176151	185806	157976	196370	422501	429113	371405	356267
18.5	176093	185402	158169	195451	421134	429057	371914	356071
18.6	176861	184743	158365	195412	418659	426774	372133	356839
18.7	175502	183959	157722	194863	422977	429050	370311	354947
18.8	175192	184060	156979	195546	420290	428582	369729	354482
18.9	176502	185628	158087	193874	420805	427814	368191	354875
19	177059	183877	156826	194585	418456	427442	369066	354369
19.1	174727	184293	156642	194497	418165	426448	366877	354589
19.2	175705	183380	156942	194074	419672	427274	368023	353558
19.3	174564	183263	156526	194829	417206	426210	367571	354554
19.4	174483	184165	156795	194162	417740	427241	366938	354993
19.5	174128	184725	155785	194986	417899	426221	367099	353844
19.6	174923	182955	155686	192853	417684	424411	366679	352523
19.7	174214	183630	155895	194521	414457	424853	366968	351111
19.8	175015	181966	156780	193480	413244	423636	365267	351933
19.9	173029	182723	155098	193567	416873	424670	363889	351780
20	173640	184384	156427	194048	414214	423225	365030	351031
20.1	174967	182641	155857	193208	413428	423188	364893	350901
20.2	173401	183617	155495	192856	413769	422090	365431	350497
20.3	174410	181329	154488	193419	413023	420853	362161	351356
20.4	173771	183666	155813	192439	413697	422818	366815	349253
20.5	173969	181778	156406	193658	414733	423191	361524	349715
20.6	172647	182164	154997	192452	412459	421553	362906	348211
20.7	174454	181489	154552	192917	411700	420441	362966	348533
20.8	173444	181573	153703	191833	412223	420129	360406	348717
20.9	172157	182001	154414	191769	411007	420620	361965	348711
21	173084	180008	153516	193099	409877	418262	359762	346529
21.1	172588	180781	154805	192013	409698	419079	360230	346547
21.2	171826	180468	154241	191524	408367	417035	361812	346493
21.3	172358	180484	153602	191420	408802	417535	359377	348413
21.4	172080	180953	154523	192326	407506	417117	358822	345138
21.5	172214	178676	154040	191956	407249	416449	358112	346559
21.6	171651	179795	154007	191289	406926	415917	360267	345262
21.7	172106	179491	154464	191614	407095	417777	359595	346042
21.8	171753	180682	153181	191078	406446	415919	357694	346093
21.9	171617	179035	153909	191775	405564	414411	357004	344817
22	171919	178467	153567	190679	405528	414502	355112	344715
22.1	171706	178141	154591	190386	403538	412670	356684	343252
22.2	170806	179814	153040	190035	406169	413101	355360	343018
22.3	170981	178440	152418	190101	404865	413904	354292	342807
22.4	170565	177858	152492	190832	403306	411866	354545	340470
22.5	170207	178211	152692	189821	402241	410629	353330	342873
22.6	170998	178797	153226	190206	403591	412643	353816	338566
22.7	171619	177773	152004	190410	402244	412139	353983	339921
22.8	171005	177063	152284	190046	402507	409915	354143	340084
22.9	169837	177490	153425	189556	402488	411073	353884	339562
23	170219	177240	152475	190007	401428	408606	351566	340841
23.1	170280	176997	153373	189803	399946	410376	351875	340775
23.2	169610	176361	152968	190178	400728	409654	352046	339152
23.3	170777	176212	151653	189026	400585	409041	352514	340749
23.4	169959	176382	151257	190175	399086	409131	350952	337733
23.5	169352	175712	151917	189861	398707	407430	349347	338081
23.6	168957	176719	152382	189452	398068	406739	350123	336464
23.7	169826	176909	152003	189313	397035	405051	350800	336759
23.8	169031	175917	150742	188208	396638	406556	349105	338299
23.9	168634	175335	151708	187711	396073	404929	350043	335695
24	169270	176467	150903	189098	395750	403927	346960	336281
24.1	167998	176342	151290	188884	394677	403882	348766	336126
24.2	168732	175666	151590	188065	395300	405076	349259	334244
24.3	169236	175096	150394	188129	396051	404032	348322	334904
24.4	168519	175179	150549	188888	393907	403683	348377	334141
24.5	168900	175201	149992	187858	393253	402270	347560	334302
24.6	168315	174815	149873	188332	394742	402146	347587	333458
24.7	167548	175141	150164	187469	392903	400558	345857	334051
24.8	167728	174758	150612	188668	391885	400504	346959	333284
24.9	166507	174827	150123	188764	391259	401213	346686	332126
25	167699	173725	149845	187782	391180	401507	345839	331609
25.1	168313	173423	150351	188510	389579	400940	344210	331382
25.2	167507	174349	149057	188795	391109	397983	344133	332364
25.3	168673	174401	149322	186719	389571	398971	344293	331524
25.4	167320	172999	149739	186722	389554	398410	343190	331074
25.5	167304	174227	149732	186508	389516	397653	342737	331047
25.6	167194	172318	148869	186185	386808	398249	342213	328965
25.7	167451	173351	149771	186937	387574	398239	342619	330924
25.8	166350	174922	149520	186063	388958	396969	341598	330083
25.9	166822	174206	148908	184364	385246	397168	341358	329009
26	166145	171723	147971	186509	386504	395939	341218	328091
26.1	166771	172955	148905	186016	386905	394095	341709	328058
26.2	166244	173190	148518	185531	385609	395427	341421	329266
26.3	164804	171504	147672	185799	382824	395352	340463	327044
26.4	165698	173505	148751	185221	386403	393025	338706	328129
26.5	164709	171970	147962	184763	385839	394377	338091	325960
26.6	165526	171903	148076	187252	382312	394021	338034	326664
26.7	165515	171097	148336	185432	381540	393214	337843	326145
26.8	166602	172755	148343	185968	383020	391689	339512	325499
26.9	165173	170526	148454	185552	381281	392472	336454	325644
27	164164	170016	147508	184891	381105	392339	337728	326333
27.1	165071	171510	147917	184079	382790	391258	336716	324907
27.2	165961	170836	147756	183130	380062	389201	334589	321814
27.3	165011	171794	147826	183778	381031	390265	336298	323953
27.4	164589	170098	149543	185003	380224	390924	335433	323814
27.5	164781	169789	146947	184026	377676	390299	333974	323690
27.6	164390	170011	148191	184311	378262	389120	335306	322874
27.7	165172	169611	146679	183598	376891	388833	334761	321508
27.8	164724	169924	148314	184094	378965	389129	333344	322478
27.9	163746	169977	146507	183661	376482	388427	333670	322565
28	164692	169481	146648	184015	376406	387599	332844	321288
28.1	163788	170103	147010	183407	375799	387940	333640	320117
28.2	163101	169903	146102	182787	375641	386412	332175	319658
28.3	163756	169670	145363	182702	374017	384626	330645	321522
28.4	163458	168949	146150	182853	374390	385252	330383	320450
28.5	164007	169179	145957	182713	373099	383951	330759	320694
28.6	163000	168818	146037	182442	373392	385020	329856	319710
28.7	163719	168771	145843	182448	374216	382849	330659	318760
28.8	161778	168386	146848	181621	373241	382895	328906	319484
28.9	163299	167742	145505	182258	372392	383476	329549	317500
29	162870	168266	145354	180537	372182	380462	328815	320420
29.1	162571	167401	145464	181773	371487	382839	328882	318190
29.2	162885	170007	145330	181769	372283	381911	326500	316756
29.3	161675	168254	145152	181540	371552	381154	328031	317085
29.4	161944	168144	145501	181922	369386	379154	327381	315674
29.5	161303	167625	144722	180735	370024	380485	327473	316950
29.6	161499	167316	145794	180801	369704	380086	325190	316738
29.7	162094	166336	144135	181366	368125	379310	328101	315179
29.8	161577	166955	144003	180520	369224	377947	325751	314767
29.9	162868	167523	144571	179282	368284	379826	324642	315280
30	161019	166426	144830	179873	368079	377626	325082	313145
30.1	161119	167554	143259	180184	366701	377684	324875	313670
30.2	161267	166882	144062	180246	366709	378589	324823	312578
30.3	161315	166714	143315	178900	367910	377520	323245	313032
30.4	160523	165801	143607	180321	366764	376388	324367	313401
