# Supplementary material for: Towards a molecular mechanism underlying mitochondrial protein import through the TOM and TIM23 complexes
Source: eLife. 2022 Jun 8;11:e75426. doi: 10.7554/eLife.75426 (PMC9255969; doi:10.7554/eLife.75426)
Supplement: Figure 1—figure supplement 1—source data 3. [file elife-75426-fig1-figsupp1-data3.xlsx]

## Sheet: Sheet1
						pmol calculations
mitos	11S Signal	Tom40 Signal	11S/Tom40	amplitudes from part B		pmol/lane (60 μg)	mol/lane (60 μg)	mol/well (6.25 μg)	concentration (M) in well (125 μl)	concentration (M) in matrix based on matrix volume 1/12345.68 of total volume (see methods)
1 19.5.21	0.00984895	0.503312	0.0195683	0.405078		0.268098	2.68098e-13	2.79269e-14	2.23415e-10	2.75821e-06
2 19.5.21	0.0120798	0.648442	0.018629	0.430787		0.278009	2.78009e-13	2.89593e-14	2.31674e-10	2.86018e-06
3 19.5.21	0.0120135	0.559366	0.021477	0.35919		0.277714	2.77714e-13	2.89286e-14	2.31429e-10	2.85714e-06
2 3.7.20	0.0140934	0.575525	0.0244879	0.439623		0.286954	2.86954e-13	2.98911e-14	2.39129e-10	2.9522e-06
1 15.2.21	0.0318619	0.398928	0.0798689	0.992262		0.36589	3.6589e-13	3.81136e-14	3.04909e-10	3.7643e-06
2 15.2.21	0.0121893	0.586845	0.0207709	1		0.278495	2.78495e-13	2.90099e-14	2.32079e-10	2.86518e-06
3 15.2.21	0.00974951	0.530576	0.0183753	0.868888		0.267657	2.67657e-13	2.78809e-14	2.23047e-10	2.75367e-06
2 25.7.20	0.113824	0.434793	0.261789	0.840391		0.730004	7.30004e-13	7.60421e-14	6.08337e-10	7.51033e-06
pmol 11S										2.75367e-06	min
0.31	0.0192781					pmol 11S	0.31	0.63		7.51033e-06	max
0.63	0.091303					signal	0.0192781	0.091303
