# Supplementary material for: Towards a molecular mechanism underlying mitochondrial protein import through the TOM and TIM23 complexes
Source: eLife. 2022 Jun 8;11:e75426. doi: 10.7554/eLife.75426 (PMC9255969; doi:10.7554/eLife.75426)
Supplement: Figure 1—figure supplement 2—source data 1. [file elife-75426-fig1-figsupp2-data1.xlsx]

## Sheet: primary data n=1
time	0	1	3	10	32	100	316	1000
0.316667	3500
0.416667	3340
0.516667	3520
0.616667	3180
0.716667	3200
0.816667	3260
0.916667	3670
1.01667	3810
1.11667	3600
1.21667	3150
1.31667	3450
1.41667	3720
1.51667	3580
1.61667	3840
1.71667	3970
1.81667	3790
1.91667	3890
2.01667	4110
2.11667	3860
2.21667	4350
2.31667	4290
2.41667	4300
2.51667	3570
2.61667	3360
2.71667	4500
2.81667	4080
2.91667	4320
3.01667	4620
3.11667	4440
3.21667	4220
3.31667	4310
3.41667	4240
3.51667	4400
3.61667	4580
3.71667	4780
3.81667	4840
3.91667	4550
4.01667	4810
4.11667	4870
4.21667	4770
4.31667	4510
4.41667	4420
4.51667	4700
4.61667	4970
4.71667	4720
4.81667	5010
4.91667	5300
5.01667	5470
5.11667	5140
5.21667	5470
5.31667	5150
5.41667	5300
5.51667	5440
5.61667	5120
5.71667	5080
5.81667	5010
5.91667	4640
6.01667	5410
6.11667	5240
6.21667	5120
6.31667	5330
6.41667	5550
6.51667	5320
6.61667	5170
6.71667	5200
6.81667	5840
6.91667	5420
7.01667	5670
7.11667	4930
7.21667	5100
7.31667	6400
7.41667	5670
7.51667	5220
7.61667	5390
7.71667	5370
7.81667	5360
7.91667	5780
8.01667	5810
8.11667	5440
8.21667	5870
8.31667	6130
8.41667	6250
8.51667	5540
8.61667	5840
8.71667	5790
8.81667	5710
8.91667	5040
9.01667	5630
9.11667	5730
9.21667	6290
9.31667	6600
9.41667	5500
9.51667	6760
9.61667	5330
9.71667	6140
9.81667	5680
9.91667	6850
10.0167	5930
10.1167	6220
10.2167	5900
10.3167	5760
10.4167	6880
10.5167	6070
10.6167	6420
10.7167	6230
10.8167	6260
10.9167	5870
11.0167	6030
11.1167	6430
11.2167	6260
11.3167	6990
11.4167	5590
11.5167	7280
11.6167	6640
11.7167	6300
11.8167	6470
11.9167	6220
12.0167	6670
12.1167	6620
12.2167	6740
12.3167	6580
12.4167	6040
12.5167	6350
12.6167	7320
12.7167	6710
12.8167	7080
12.9167	7060
13.0167	7520
13.1167	7770
13.2167	6370
13.3167	6910
13.4167	6560
13.5167	7080
13.6167	6330
13.7167	6830
13.8167	7240
13.9167	6530
14.0167	6690
14.1167	6940
14.2167	7940
14.3167	6920
14.4167	6750
14.5167	7630
14.6167	6090
14.7167	6250
14.8167	6690
14.9167	7090
15.0167	7080
15.1167	6970
15.2167	7410
15.3167	7370
15.4167	7330
15.5167	7190
15.6167	7700
15.7167	7110
15.8167	7060
15.9167	7490
16.0167	7100
16.1167	6550
16.2167	6970
16.3167	7180
16.4167	7000
16.5167	7420
16.6167	7760
16.7167	7600
16.8167	6880
16.9167	7390
17.0167	6950
17.1167	7500
17.2167	7110
17.3167	7590
17.4167	7580
17.5167	7480
17.6167	7060
17.7167	7170
17.8167	7670
17.9167	7680
18.0167	7650
18.1167	7640
18.2167	7440
18.3167	7880
18.4167	7820
18.5167	7890
18.6167	7020
18.7167	6830
18.8167	7000
18.9167	6280
19.0167	7090
19.1167	7470
19.2167	7520
19.3167	7400
19.4167	7170
19.5167	7960
19.6167	7720
19.7167	7720
19.8167	7790
19.9167	8180
20.0167	7940
20.1167	7360
20.2167	7320
20.3167	7040
20.4167	7860
20.5167	7890
20.6167	7130
20.7167	7220
20.8167	8230
20.9167	7420
21.0167	7640
21.1167	7570
21.2167	8100
21.3167	8270
21.4167	7910
21.5167	7270
21.6167	8440
21.7167	7960
21.8167	7790
21.9167	7670
22.0167	7880
22.1167	7840
22.2167	7670
22.3167	8590
22.4167	7030
22.5167	7810
22.6167	7940
22.7167	7750
22.8167	8300
22.9167	8090
23.0167	7960
23.1167	8660
23.2167	8230
23.3167	7980
23.4167	7330
23.5167	8720
23.6167	7780
23.7167	8280
23.8167	7940
23.9167	7210
24.0167	7800
24.1167	8020
24.2167	7900
24.3167	8520
24.4167	8430
24.5167	6970
24.6167	8470
24.7167	8620
24.8167	8400
24.9167	7260
25.0167	7640
25.1167	7300
25.2167	8320
25.3167	8530
25.4167	7980
25.5167	8350
25.6167	7700
25.7167	8070
25.8167	8030
25.9167	7670
26.0167	7700
26.1167	8030
26.2167	8110
26.3167	8100
26.4167	8140
26.5167	8030
26.6167	7550
26.7167	8590
26.8167	7760
26.9167	7850
27.0167	8160
27.1167	7720
27.2167	8230
27.3167	9050
27.4167	8080
27.5167	7870
27.6167	8300
27.7167	8470
27.8167	8330
27.9167	8340
28.0167	8050
28.1167	7980
28.2167	8120
28.3167	7910
28.4167	8410
28.5167	9090
28.6167	7920
28.7167	7850
28.8167	7750
28.9167	8410
29.0167	8070
29.1167	8580
29.2167	8090
29.3167	7890
29.4167	8600
29.5167	8680
29.6167	7640
29.7167	8330
29.8167	9730
0.302222		4110
0.402222		4620
0.502222		5230
0.602222		5820
0.702222		6390
0.802222		6560
0.902222		7240
1.00222		7550
1.10222		8120
1.20222		7430
1.30222		8650
1.40222		9690
1.50222		9130
1.60222		9980
1.70222		9720
1.80222		9600
1.90222		10790
2.00222		11780
2.10222		10750
2.20222		12410
2.30222		12670
2.40222		12500
2.50222		12830
2.60222		12450
2.70222		12290
2.80222		14130
2.90222		14600
3.00222		15560
3.10222		14210
3.20222		15650
3.30222		15450
3.40222		15930
3.50222		16290
3.60222		16150
3.70222		16780
3.80222		16590
3.90222		16950
4.00222		17210
4.10222		17290
4.20222		18750
4.30222		18460
4.40222		18480
4.50222		18750
4.60222		19250
4.70222		20250
4.80222		21550
4.90222		20760
5.00222		20660
5.10222		20640
5.20222		21650
5.30222		21140
5.40222		22340
5.50222		22210
5.60222		23350
5.70222		22490
5.80222		24520
5.90222		23050
6.00222		23890
6.10222		24230
6.20222		24090
6.30222		24260
6.40222		23800
6.50222		25450
6.60222		25290
6.70222		25070
6.80222		26620
6.90222		25430
7.00222		27050
7.10222		26050
7.20222		26410
7.30222		25850
7.40222		27990
7.50222		28980
7.60222		26660
7.70222		27960
7.80222		28300
7.90222		27140
8.00222		29170
8.10222		30120
8.20222		29010
8.30222		28110
8.40222		29340
8.50222		27670
8.60222		29690
8.70222		29460
8.80222		30600
8.90222		29910
9.00222		30010
9.10222		30310
9.20222		29790
9.30222		31590
9.40222		31980
9.50222		31840
9.60222		31190
9.70222		32120
9.80222		33610
9.90222		32960
10.0022		33210
10.1022		33060
10.2022		33160
10.3022		33950
10.4022		33860
10.5022		35400
10.6022		33500
10.7022		35270
10.8022		35020
10.9022		33720
11.0022		35320
11.1022		35290
11.2022		34470
11.3022		34580
11.4022		35810
11.5022		35400
11.6022		36900
11.7022		37190
11.8022		36320
11.9022		37160
12.0022		37130
12.1022		37130
12.2022		36400
12.3022		37000
12.4022		36550
12.5022		37740
12.6022		37640
12.7022		39530
12.8022		37620
12.9022		37480
13.0022		39850
13.1022		39490
13.2022		39390
13.3022		39370
13.4022		38140
13.5022		37650
13.6022		40410
13.7022		39860
13.8022		40260
13.9022		40270
14.0022		40260
14.1022		41330
14.2022		39400
14.3022		41550
14.4022		41340
14.5022		41620
14.6022		41900
14.7022		41370
14.8022		41110
14.9022		41880
15.0022		41680
15.1022		41160
15.2022		43800
15.3022		42490
15.4022		42200
15.5022		43810
15.6022		42480
15.7022		42690
15.8022		40730
15.9022		43360
16.0022		41840
16.1022		43860
16.2022		42590
16.3022		45210
16.4022		43100
16.5022		44800
16.6022		43590
16.7022		43940
16.8022		42780
16.9022		44650
17.0022		44510
17.1022		44780
17.2022		44330
17.3022		44250
17.4022		43730
17.5022		43950
17.6022		45630
17.7022		45480
17.8022		45240
17.9022		43700
18.0022		44190
18.1022		44050
18.2022		45030
18.3022		46840
18.4022		43410
18.5022		45550
18.6022		46230
18.7022		44810
18.8022		45510
18.9022		45610
19.0022		46970
19.1022		45950
19.2022		45850
19.3022		47060
19.4022		46330
19.5022		46680
19.6022		45790
19.7022		45390
19.8022		46020
19.9022		47030
20.0022		45790
20.1022		44920
20.2022		47790
20.3022		46940
20.4022		46950
20.5022		49940
20.6022		46520
20.7022		48550
20.8022		48780
20.9022		48520
21.0022		47230
21.1022		49340
21.2022		48580
21.3022		47490
21.4022		48750
21.5022		48510
21.6022		46650
21.7022		48750
21.8022		49330
21.9022		48760
22.0022		49070
22.1022		47940
22.2022		49370
22.3022		49390
22.4022		48040
22.5022		48710
22.6022		51570
22.7022		51250
22.8022		49660
22.9022		48920
23.0022		50330
23.1022		48940
23.2022		50180
23.3022		47280
23.4022		51230
23.5022		50650
23.6022		51010
23.7022		49270
23.8022		48750
23.9022		50970
24.0022		50830
24.1022		47320
24.2022		49170
24.3022		52090
24.4022		51080
24.5022		48500
24.6022		49090
24.7022		50480
24.8022		50030
24.9022		51360
25.0022		50780
25.1022		53370
25.2022		50750
25.3022		52190
25.4022		52300
25.5022		49370
25.6022		52370
25.7022		50280
25.8022		50720
25.9022		50470
26.0022		50970
26.1022		50830
26.2022		49930
26.3022		52220
26.4022		52860
26.5022		51500
26.6022		52100
26.7022		50270
26.8022		52630
26.9022		51550
27.0022		53620
27.1022		50860
27.2022		51920
27.3022		51250
27.4022		52120
27.5022		51070
27.6022		51630
27.7022		49800
27.8022		53740
27.9022		54500
28.0022		54140
28.1022		52510
28.2022		52760
28.3022		53490
28.4022		52570
28.5022		52570
28.6022		50760
28.7022		53700
28.8022		52380
28.9022		53120
29.0022		53190
29.1022		52540
29.2022		54030
29.3022		54170
29.4022		54030
29.5022		51420
29.6022		53630
29.7022		51470
29.8022		54460
29.9022		52070
30.0022		54420
30.1022		54670
0.287778			10890
0.387778			11490
0.487778			15670
0.587778			19430
0.687778			20120
0.787778			21260
0.887778			23030
0.987778			26640
1.08778			28810
1.18778			29670
1.28778			31910
1.38778			33980
1.48778			37760
1.58778			37820
1.68778			41740
1.78778			42260
1.88778			45070
1.98778			45950
2.08778			49810
2.18778			49210
2.28778			51530
2.38778			53280
2.48778			57080
2.58778			57190
2.68778			60930
2.78778			64150
2.88778			63460
2.98778			64240
3.08778			67900
3.18778			69300
3.28778			71990
3.38778			71730
3.48778			75770
3.58778			75950
3.68778			78190
3.78778			78410
3.88778			82180
3.98778			80880
4.08778			86100
4.18778			87220
4.28778			90170
4.38778			91920
4.48778			93390
4.58778			92160
4.68778			95700
4.78778			94000
4.88778			98920
4.98778			101130
5.08778			103140
5.18778			99800
5.28778			105800
5.38778			105330
5.48778			106630
5.58778			105270
5.68778			108700
5.78778			110960
5.88778			115480
5.98778			114870
6.08778			113690
6.18778			117310
6.28778			119280
6.38778			118930
6.48778			121460
6.58778			121340
6.68778			125640
6.78778			127990
6.88778			126360
6.98778			126290
7.08778			130700
7.18778			130870
7.28778			133090
7.38778			133330
7.48778			137640
7.58778			135650
7.68778			140060
7.78778			141570
7.88778			143300
7.98778			141760
8.08778			144470
8.18778			142980
8.28778			148620
8.38778			145710
8.48778			147770
8.58778			149300
8.68778			154310
8.78778			151110
8.88778			156080
8.98778			153430
9.08778			156700
9.18778			157140
9.28778			155990
9.38778			157700
9.48778			161000
9.58778			162920
9.68778			163890
9.78778			166630
9.88778			165490
9.98778			163460
10.0878			169180
10.1878			169060
10.2878			168810
10.3878			169240
10.4878			171990
10.5878			171660
10.6878			177830
10.7878			174630
10.8878			174350
10.9878			179610
11.0878			176110
11.1878			177540
11.2878			178780
11.3878			180670
11.4878			183210
11.5878			184370
11.6878			185410
11.7878			186930
11.8878			185970
11.9878			184340
12.0878			190620
12.1878			184150
12.2878			187220
12.3878			186950
12.4878			189530
12.5878			192980
12.6878			194010
12.7878			194320
12.8878			194770
12.9878			197750
13.0878			196210
13.1878			197270
13.2878			196130
13.3878			198710
13.4878			198780
13.5878			197970
13.6878			202960
13.7878			201420
13.8878			203450
13.9878			205070
14.0878			206370
14.1878			203940
14.2878			207760
14.3878			207100
14.4878			206250
14.5878			206320
14.6878			211340
14.7878			207570
14.8878			211430
14.9878			211730
15.0878			209440
15.1878			212400
15.2878			213220
15.3878			217040
15.4878			214910
15.5878			217920
15.6878			219880
15.7878			218100
15.8878			218800
15.9878			217080
16.0878			218970
16.1878			220800
16.2878			221660
16.3878			223100
16.4878			225860
16.5878			218790
16.6878			224460
16.7878			222550
16.8878			221220
16.9878			222150
17.0878			224830
17.1878			223860
17.2878			223870
17.3878			222990
17.4878			227860
17.5878			227070
17.6878			223700
17.7878			227670
17.8878			227340
17.9878			229610
18.0878			226960
18.1878			230590
18.2878			230420
18.3878			229620
18.4878			231970
18.5878			232980
18.6878			231560
18.7878			234040
18.8878			233780
18.9878			237950
19.0878			231870
19.1878			236160
19.2878			235620
19.3878			237360
19.4878			235750
19.5878			234550
19.6878			243270
19.7878			235020
19.8878			238000
19.9878			236410
20.0878			242340
20.1878			232970
20.2878			238360
20.3878			238820
20.4878			237160
20.5878			239950
20.6878			238110
20.7878			238400
20.8878			239520
20.9878			236780
21.0878			241810
21.1878			242400
21.2878			242490
21.3878			246540
21.4878			244960
21.5878			243500
21.6878			243060
21.7878			238870
21.8878			245410
21.9878			247720
22.0878			244370
22.1878			247390
22.2878			247880
22.3878			245680
22.4878			242180
22.5878			245520
22.6878			247240
22.7878			244910
22.8878			248470
22.9878			248120
23.0878			249590
23.1878			243080
23.2878			248260
23.3878			251410
23.4878			252840
23.5878			248500
23.6878			252440
23.7878			251260
23.8878			246970
23.9878			246860
24.0878			251110
24.1878			250310
24.2878			251090
24.3878			249450
24.4878			254950
24.5878			251240
24.6878			249830
24.7878			250260
24.8878			254320
24.9878			251830
25.0878			253240
25.1878			251780
25.2878			254000
25.3878			254830
25.4878			256310
25.5878			250890
25.6878			259980
25.7878			251590
25.8878			255560
25.9878			254730
26.0878			256750
26.1878			255310
26.2878			253680
26.3878			257720
26.4878			259380
26.5878			257690
26.6878			257710
26.7878			255680
26.8878			260620
26.9878			258920
27.0878			256510
27.1878			256600
27.2878			252370
27.3878			257100
27.4878			261580
0.273333				75890
0.373333				105390
0.473333				131770
0.573333				157680
0.673333				183180
0.773333				212520
0.873333				232500
0.973333				262080
1.07333				287140
1.17333				309960
1.27333				330240
1.37333				352100
1.47333				380180
1.57333				401450
1.67333				424990
1.77333				446280
1.87333				470230
1.97333				490540
2.07333				505960
2.17333				532660
2.27333				548640
2.37333				572860
2.47333				588610
2.57333				606480
2.67333				627080
2.77333				641670
2.87333				667930
2.97333				677700
3.07333				698100
3.17333				711840
3.27333				723780
3.37333				755100
3.47333				770010
3.57333				790260
3.67333				808660
3.77333				825090
3.87333				840080
3.97333				852820
4.07333				867380
4.17333				886850
4.27333				900270
4.37333				914200
4.47333				931250
4.57333				941050
4.67333				959290
4.77333				984560
4.87333				981620
4.97333				998900
5.07333				1019600
5.17333				1031570
5.27333				1041020
5.37333				1064770
5.47333				1056240
5.57333				1070770
5.67333				1084870
5.77333				1097080
5.87333				1108160
5.97333				1118010
6.07333				1135920
6.17333				1142830
6.27333				1164990
6.37333				1168450
6.47333				1186610
6.57333				1196440
6.67333				1204110
6.77333				1211190
6.87333				1228840
6.97333				1229550
7.07333				1240680
7.17333				1258460
7.27333				1266600
7.37333				1276770
7.47333				1282220
7.57333				1299130
7.67333				1323430
7.77333				1321090
7.87333				1319540
7.97333				1341950
8.07333				1355580
8.17333				1347510
8.27333				1370560
8.37333				1378410
8.47333				1382550
8.57333				1382750
8.67333				1391960
8.77333				1412530
8.87333				1430100
8.97333				1412260
9.07333				1431080
9.17333				1430250
9.27333				1444900
9.37333				1459400
9.47333				1453870
9.57333				1470970
9.67333				1478720
9.77333				1489350
9.87333				1495550
9.97333				1502520
10.0733				1507200
10.1733				1501500
10.2733				1513720
10.3733				1521600
10.4733				1527070
10.5733				1532420
10.6733				1543060
10.7733				1552450
10.8733				1543080
10.9733				1546470
11.0733				1563120
11.1733				1567590
11.2733				1570100
11.3733				1572790
11.4733				1583190
11.5733				1585710
11.6733				1587010
11.7733				1594040
11.8733				1597890
11.9733				1597120
12.0733				1608900
12.1733				1623650
12.2733				1609130
12.3733				1610030
12.4733				1612230
12.5733				1625780
12.6733				1630740
12.7733				1632270
12.8733				1635910
12.9733				1634120
13.0733				1630120
13.1733				1645950
13.2733				1646870
13.3733				1649430
13.4733				1642180
13.5733				1659350
13.6733				1654690
13.7733				1661030
13.8733				1659360
13.9733				1659300
14.0733				1667230
14.1733				1673110
14.2733				1680810
14.3733				1681730
14.4733				1672840
14.5733				1676480
14.6733				1683910
14.7733				1677820
14.8733				1697060
14.9733				1689460
15.0733				1686410
15.1733				1696870
15.2733				1685740
15.3733				1697130
15.4733				1699350
15.5733				1687600
15.6733				1695290
15.7733				1692360
15.8733				1686890
15.9733				1691610
16.0733				1702960
16.1733				1696900
16.2733				1700900
16.3733				1712680
16.4733				1694340
16.5733				1710550
16.6733				1695030
16.7733				1708980
16.8733				1704540
16.9733				1720900
17.0733				1708330
17.1733				1719520
17.2733				1708330
17.3733				1709660
17.4733				1710260
17.5733				1702650
17.6733				1704140
17.7733				1710770
17.8733				1717110
17.9733				1727070
0.258889					466260
0.358889					651150
0.458889					811590
0.558889					972250
0.658889					1117380
0.758889					1246650
0.858889					1380060
0.958889					1495690
1.05889					1614070
1.15889					1714900
1.25889					1828280
1.35889					1898990
1.45889					2009670
1.55889					2089530
1.65889					2177600
1.75889					2261390
1.85889					2340550
1.95889					2392060
2.05889					2458300
2.15889					2532410
2.25889					2586680
2.35889					2648000
2.45889					2702470
2.55889					2748100
2.65889					2801270
2.75889					2870010
2.85889					2883720
2.95889					2922730
3.05889					2968930
3.15889					3007040
3.25889					3048470
3.35889					3061410
3.45889					3112030
3.55889					3127930
3.65889					3183690
3.75889					3193270
3.85889					3216760
3.95889					3230720
4.05889					3244940
4.15889					3298040
4.25889					3298370
4.35889					3314060
4.45889					3327900
4.55889					3350520
4.65889					3368990
4.75889					3378300
4.85889					3391940
4.95889					3419040
5.05889					3426450
5.15889					3440160
5.25889					3433830
5.35889					3448160
5.45889					3442500
5.55889					3479610
5.65889					3473430
5.75889					3473080
5.85889					3475200
5.95889					3482580
6.05889					3499010
6.15889					3504570
6.25889					3493870
6.35889					3504980
6.45889					3506120
6.55889					3499480
6.65889					3515190
6.75889					3529680
6.85889					3512360
6.95889					3518710
7.05889					3515960
7.15889					3524950
7.25889					3518150
7.35889					3517670
7.45889					3533880
7.55889					3524670
7.65889					3518670
7.75889					3533750
7.85889					3517410
7.95889					3534120
8.05889					3534760
0.244444						1430940
0.344444						1908170
0.444444						2306870
0.544444						2634210
0.644444						2916540
0.744444						3130730
0.844444						3322510
0.944444						3489430
1.04444						3618520
1.14444						3722090
1.24444						3825400
1.34444						3900920
1.44444						3975720
1.54444						4044990
1.64444						4083670
1.74444						4124050
1.84444						4167110
1.94444						4190830
2.04444						4243970
2.14444						4248950
2.24444						4288570
2.34444						4288510
2.44444						4309800
2.54444						4311270
2.64444						4337300
2.74444						4355490
2.84444						4360150
2.94444						4359760
3.04444						4370850
3.14444						4373980
3.24444						4376630
3.34444						4384310
3.44444						4386160
3.54444						4364290
3.64444						4390360
0.23							2938480
0.33							3609730
0.43							4006770
0.53							4280940
0.63							4461110
0.73							4544640
0.83							4617340
0.93							4675500
1.03							4717790
1.13							4739960
1.23							4791230
1.33							4793530
1.43							4808440
1.53							4841650
1.63							4832930
1.73							4833230
1.83							4854820
1.93							4880760
2.03							4872970
2.13							4893500
2.23							4899970
2.33							4915050
2.43							4907880
2.53							4917410
2.63							4938750
2.73							4919910
2.83							4930390
2.93							4942200
3.03							4959150
3.13							4937070
3.23							4957490
3.33							4941420
3.43							4953520
3.53							4937020
3.63							4948510
3.73							4963440
3.83							4975290
0.215555								4347340
0.315555								4762280
0.415555								4915530
0.515555								4999660
0.615555								5090450
0.715555								5120040
0.815555								5156390
0.915555								5215890
1.01556								5228560
1.11556								5269460
1.21556								5286600
1.31556								5325430
1.41556								5354840
1.51556								5386270
1.61556								5413560
1.71556								5422310
1.81556								5445390
1.91556								5492520
2.01556								5484500
2.11556								5532340
2.21556								5548820
2.31556								5565840
2.41556								5548020
2.51556								5583150
2.61556								5597770
2.71556								5609790
2.81556								5633240
2.91556								5648120
3.01556								5658650
3.11556								5667450
3.21556								5671820
3.31556								5678460
3.41556								5692790
3.51556								5708360
3.61556								5722240
3.71556								5711650
3.81556								5749180
3.91556								5746400
4.01556								5756150
4.11556								5747140
4.21556								5769360
4.31556								5763960
4.41556								5777360
4.51556								5758330
4.61556								5755480
4.71556								5782000
4.81556								5770890
4.91556								5784990
5.01556								5776720
5.11556								5794150
5.21556								5799850
5.31556								5775050
5.41556								5783790
5.51556								5804030
5.61556								5770820
5.71556								5799670
5.81556								5774970
5.91556								5818330

## Sheet: primary data n=2
time (sec)	0	1	3	10	32	100	316	1000
0.201111	2020
0.301111	2140
0.401111	2000
0.501111	2430
0.951111	1860
1.05111	2580
1.15111	2230
1.25111	1920
1.35111	2510
1.45111	2700
1.55111	2670
1.65111	2740
1.75111	2700
1.85111	2720
1.95111	2300
2.05111	2710
2.15111	3050
2.25111	3230
2.35111	3260
2.45111	3340
2.55111	3040
2.65111	3300
2.75111	3160
2.85111	2970
2.95111	3370
3.05111	3860
3.15111	3260
3.25111	3830
3.35111	4000
3.45111	3360
3.55111	3910
3.65111	3440
3.75111	4150
3.85111	2950
3.95111	3620
4.05111	3230
4.15111	3710
4.25111	3410
4.35111	4620
4.45111	3600
4.55111	3590
4.65111	4030
4.75111	3570
4.85111	4060
4.95111	4050
5.05111	4180
5.15111	3790
5.25111	3960
5.35111	4360
5.45111	4220
5.55111	4170
5.65111	4670
5.75111	3790
5.85111	4130
5.95111	4290
6.05111	4000
6.15111	3980
6.25111	4150
6.35111	4370
6.45111	4090
6.55111	5100
6.65111	4600
6.75111	4580
6.85111	4370
6.95111	4210
7.05111	4750
7.15111	4570
7.25111	4430
7.35111	4810
7.45111	5320
7.55111	4710
7.65111	5020
7.75111	4810
7.85111	5430
7.95111	5100
8.05111	4620
8.15111	4720
8.25111	5070
8.35111	4580
8.45111	5470
8.55111	5150
8.65111	5390
8.75111	4680
8.85111	5390
8.95111	5750
9.05111	4820
9.15111	5060
9.25111	4990
9.35111	5470
9.45111	5590
9.55111	4910
9.65111	5430
9.75111	5530
9.85111	5780
9.95111	5300
10.0511	5660
10.1511	5280
10.2511	5110
10.3511	5450
10.4511	5740
10.5511	5560
10.6511	5210
10.7511	5790
10.8511	5720
10.9511	5370
11.0511	5590
11.1511	5810
11.2511	5820
11.3511	5780
11.4511	5130
11.5511	5490
11.6511	5780
11.7511	5930
11.8511	6180
11.9511	5740
12.0511	5740
12.1511	5950
12.2511	6110
12.3511	6410
12.4511	6300
12.5511	5840
12.6511	6210
12.7511	5740
12.8511	5740
12.9511	6080
13.0511	5790
13.1511	6560
13.2511	6570
13.3511	6260
13.4511	5780
13.5511	6420
13.6511	6130
13.7511	5970
13.8511	6000
13.9511	6580
14.0511	5280
14.1511	6440
14.2511	6310
14.3511	6490
14.4511	5910
14.5511	6230
14.6511	6020
14.7511	6350
14.8511	6170
14.9511	6030
15.0511	5960
15.1511	6830
15.2511	6380
15.3511	6550
15.4511	7270
15.5511	5980
15.6511	5960
15.7511	6730
15.8511	6160
15.9511	6210
16.0511	6770
16.1511	6780
16.2511	7270
16.3511	6530
16.4511	6100
16.5511	6500
16.6511	7120
16.7511	6720
16.8511	6260
16.9511	6830
17.0511	6590
17.1511	6400
17.2511	6190
17.3511	7450
17.4511	6440
17.5511	6350
17.6511	6490
17.7511	6900
17.8511	7540
17.9511	6760
18.0511	7100
18.1511	7210
18.2511	6710
18.3511	7060
18.4511	7050
18.5511	6490
18.6511	7290
18.7511	6330
18.8511	6260
18.9511	6810
19.0511	6950
19.1511	6730
19.2511	6850
19.3511	6590
19.4511	6820
19.5511	6680
19.6511	7260
19.7511	6440
19.8511	7000
19.9511	6800
20.0511	6900
20.1511	6830
20.2511	7400
20.3511	6650
20.4511	6640
20.5511	6600
20.6511	6850
20.7511	6850
20.8511	7680
20.9511	6770
21.0511	7080
21.1511	7160
21.2511	6660
21.3511	6840
21.4511	7310
21.5511	7080
21.6511	7170
21.7511	7550
21.8511	6690
21.9511	6860
22.0511	6750
22.1511	6970
22.2511	6820
22.3511	6810
22.4511	7150
22.5511	7190
22.6511	7430
22.7511	6590
22.8511	7270
22.9511	7480
23.0511	6900
23.1511	7060
23.2511	5760
23.3511	7620
23.4511	6940
23.5511	7570
23.6511	7250
23.7511	7130
23.8511	6690
23.9511	7400
24.0511	6800
24.1511	6800
24.2511	6940
24.3511	7360
24.4511	7460
24.5511	7040
24.6511	7500
24.7511	6720
24.8511	8240
0.186666		4830
0.286666		5610
0.386666		6420
0.486666		6540
0.936666		10710
1.03667		11470
1.13667		12110
1.23667		13730
1.33667		13470
1.43667		15060
1.53667		15100
1.63667		16530
1.73667		16640
1.83667		16460
1.93667		18430
2.03667		18030
2.13667		19980
2.23667		20330
2.33667		20690
2.43667		20650
2.53667		21990
2.63667		22640
2.73667		22690
2.83667		23150
2.93667		24130
3.03667		24560
3.13667		25430
3.23667		27980
3.33667		27040
3.43667		27290
3.53667		28720
3.63667		27890
3.73667		29690
3.83667		29890
3.93667		31280
4.03667		30340
4.13667		31380
4.23667		32400
4.33667		33810
4.43667		32490
4.53667		33970
4.63667		34340
4.73667		33840
4.83667		37040
4.93667		37240
5.03667		36500
5.13667		38770
5.23667		36740
5.33667		38350
5.43667		39650
5.53667		39490
5.63667		38750
5.73667		38540
5.83667		41090
5.93667		43350
6.03667		43630
6.13667		42790
6.23667		42830
6.33667		44190
6.43667		44650
6.53667		41930
6.63667		44290
6.73667		45810
6.83667		44550
6.93667		46810
7.03667		47250
7.13667		48680
7.23667		47470
7.33667		47260
7.43667		50100
7.53667		50210
7.63667		50470
7.73667		50310
7.83667		52630
7.93667		53280
8.03667		51060
8.13667		50740
8.23667		53590
8.33667		54390
8.43667		51970
8.53667		52990
8.63667		57260
8.73667		56300
8.83667		54170
8.93667		54690
9.03667		57020
9.13667		56260
9.23667		58490
9.33667		59720
9.43667		58300
9.53667		58160
9.63667		59920
9.73667		60740
9.83667		60030
9.93667		60050
10.0367		59000
10.1367		61740
10.2367		61300
10.3367		61320
10.4367		62680
10.5367		62270
10.6367		64000
10.7367		62470
10.8367		64350
10.9367		63420
11.0367		64250
11.1367		65470
11.2367		66140
11.3367		64650
11.4367		65950
11.5367		64200
11.6367		63730
11.7367		67100
11.8367		67810
11.9367		67310
12.0367		69600
12.1367		66140
12.2367		67540
12.3367		69690
12.4367		67170
12.5367		68590
12.6367		67630
12.7367		70600
12.8367		70110
12.9367		71410
13.0367		70610
13.1367		72830
13.2367		71440
13.3367		70910
13.4367		71060
13.5367		71810
13.6367		72180
13.7367		73660
13.8367		73250
13.9367		73530
14.0367		73670
14.1367		75090
14.2367		76020
14.3367		75510
14.4367		73490
14.5367		74740
14.6367		76680
14.7367		76580
14.8367		74640
14.9367		76730
15.0367		77890
15.1367		74200
15.2367		77710
15.3367		81210
15.4367		77630
15.5367		77600
15.6367		76850
15.7367		77250
15.8367		77690
15.9367		83120
16.0367		79400
16.1367		79640
16.2367		79900
16.3367		80480
16.4367		81690
16.5367		80090
16.6367		80950
16.7367		82170
16.8367		80800
16.9367		81520
17.0367		81920
17.1367		82000
17.2367		82050
17.3367		87940
17.4367		82420
17.5367		85520
17.6367		85110
17.7367		84220
17.8367		84090
17.9367		83190
18.0367		86700
18.1367		84810
18.2367		86810
18.3367		86050
18.4367		88080
18.5367		84350
18.6367		85290
18.7367		84090
18.8367		86120
18.9367		86750
19.0367		86760
19.1367		85860
19.2367		86320
19.3367		86930
19.4367		86790
19.5367		86260
19.6367		87460
19.7367		87310
19.8367		89220
19.9367		88180
20.0367		90230
20.1367		87520
20.2367		88280
20.3367		87320
20.4367		89010
20.5367		89520
20.6367		89970
20.7367		89320
20.8367		88770
20.9367		90420
21.0367		90320
21.1367		89410
21.2367		90550
21.3367		90940
21.4367		89610
21.5367		90730
21.6367		90940
21.7367		91190
21.8367		91340
21.9367		92190
22.0367		91490
22.1367		90430
22.2367		90110
22.3367		94720
22.4367		92370
22.5367		94000
22.6367		91850
22.7367		94180
22.8367		90820
22.9367		91550
23.0367		93470
23.1367		93190
23.2367		92510
23.3367		94650
23.4367		94150
23.5367		93680
23.6367		93230
23.7367		94530
23.8367		93970
23.9367		93650
24.0367		94260
24.1367		95700
24.2367		93880
24.3367		91590
24.4367		95950
24.5367		93980
24.6367		94900
24.7367		95820
24.8367		93870
24.9367		95000
25.0367		93210
25.1367		94290
25.2367		94490
25.3367		98080
25.4367		99560
25.5367		97010
25.6367		94970
25.7367		97520
25.8367		97530
25.9367		97410
26.0367		96010
26.1367		94700
26.2367		99970
26.3367		97520
26.4367		98470
26.5367		98810
26.6367		93870
26.7367		97770
26.8367		97820
26.9367		97960
27.0367		100710
27.1367		99510
27.2367		98750
27.3367		99360
27.4367		99100
27.5367		97740
27.6367		100570
27.7367		99900
27.8367		101170
27.9367		97600
28.0367		97450
28.1367		100500
28.2367		98540
28.3367		97980
28.4367		98150
28.5367		100900
28.6367		100050
28.7367		101420
28.8367		99520
28.9367		97870
29.0367		99110
29.1367		100830
29.2367		99510
29.3367		102520
29.4367		98640
29.5367		100500
29.6367		98630
29.7367		100530
29.8367		97880
29.9367		100010
30.0367		100200
30.1367		102910
30.2367		99000
30.3367		101190
30.4367		102320
30.5367		102900
30.6367		101380
30.7367		102570
30.8367		103260
0.172222			14160
0.272222			16730
0.372222			19770
0.472222			24110
0.922222			39580
1.02222			41080
1.12222			45900
1.22222			48120
1.32222			53080
1.42222			54370
1.52222			59210
1.62222			59460
1.72222			63210
1.82222			66330
1.92222			66160
2.02222			74690
2.12222			74140
2.22222			79580
2.32222			80560
2.42222			84790
2.52222			87250
2.62222			92800
2.72222			90760
2.82222			94450
2.92222			98040
3.02222			100830
3.12222			103420
3.22222			103250
3.32222			107060
3.42222			113960
3.52222			118630
3.62222			116080
3.72222			120710
3.82222			119610
3.92222			123890
4.02222			129130
4.12222			131270
4.22222			131650
4.32222			135490
4.42222			139600
4.52222			137720
4.62222			142660
4.72222			145040
4.82222			148820
4.92222			153030
5.02222			152320
5.12222			149830
5.22222			153740
5.32222			157560
5.42222			160570
5.52222			163310
5.62222			165420
5.72222			167460
5.82222			167120
5.92222			171620
6.02222			172230
6.12222			175220
6.22222			180810
6.32222			183110
6.42222			180960
6.52222			183100
6.62222			185520
6.72222			187160
6.82222			186490
6.92222			191890
7.02222			192220
7.12222			195570
7.22222			197240
7.32222			199140
7.42222			205820
7.52222			202650
7.62222			206990
7.72222			209740
7.82222			207770
7.92222			212930
8.02222			216230
8.12222			216620
8.22222			215650
8.32222			221160
8.42222			220770
8.52222			222650
8.62222			224280
8.72222			225680
8.82222			232940
8.92222			226720
9.02222			233900
9.12222			236160
9.22222			239610
9.32222			240670
9.42222			239620
9.52222			241480
9.62222			247930
9.72222			244490
9.82222			245390
9.92222			245730
10.0222			249140
10.1222			256950
10.2222			253730
10.3222			258820
10.4222			256040
10.5222			260370
10.6222			259020
10.7222			259450
10.8222			266080
10.9222			263430
11.0222			263430
11.1222			270040
11.2222			270620
11.3222			266510
11.4222			272060
11.5222			270200
11.6222			271800
11.7222			272980
11.8222			280130
11.9222			271940
12.0222			277450
12.1222			281920
12.2222			283270
12.3222			285010
12.4222			287200
12.5222			288170
12.6222			290250
12.7222			289840
12.8222			292350
12.9222			294790
13.0222			292520
13.1222			293200
13.2222			289780
13.3222			296860
13.4222			295580
13.5222			299950
13.6222			300500
13.7222			302650
13.8222			303620
13.9222			300700
14.0222			308410
14.1222			307800
14.2222			309670
14.3222			305090
14.4222			309300
14.5222			312200
14.6222			310580
14.7222			316260
14.8222			309690
14.9222			314710
15.0222			317990
15.1222			318130
15.2222			313950
15.3222			319280
15.4222			317250
15.5222			322240
15.6222			321990
15.7222			324580
15.8222			320400
15.9222			327610
16.0222			331310
16.1222			325280
16.2222			326290
16.3222			327030
16.4222			329020
16.5222			326730
16.6222			330770
16.7222			332000
16.8222			334770
16.9222			335810
17.0222			335740
17.1222			332510
17.2222			341960
17.3222			338750
17.4222			341630
17.5222			337520
17.6222			335680
17.7222			345550
17.8222			341090
17.9222			344410
18.0222			346130
18.1222			343220
18.2222			346450
18.3222			350370
18.4222			348070
18.5222			345220
18.6222			350260
18.7222			346680
18.8222			347020
18.9222			351560
19.0222			349680
19.1222			350010
19.2222			352640
19.3222			353870
19.4222			349890
19.5222			353890
19.6222			350780
19.7222			352910
19.8222			355520
19.9222			357060
20.0222			356730
20.1222			362150
20.2222			356760
20.3222			360630
20.4222			357840
20.5222			361210
20.6222			358000
20.7222			363640
20.8222			362010
20.9222			365640
21.0222			367890
21.1222			362620
21.2222			361360
21.3222			360790
21.4222			363550
21.5222			364740
21.6222			363270
21.7222			366830
21.8222			368020
21.9222			361990
22.0222			366910
22.1222			363160
22.2222			364460
22.3222			366740
22.4222			371980
22.5222			369420
22.6222			376610
22.7222			374260
22.8222			371200
22.9222			371080
23.0222			373740
23.1222			373350
23.2222			373440
23.3222			380910
23.4222			378680
23.5222			377220
23.6222			377930
23.7222			378070
23.8222			373600
23.9222			378180
24.0222			376250
24.1222			373350
24.2222			382560
24.3222			382470
24.4222			374380
24.5222			377560
24.6222			377240
24.7222			381060
24.8222			378090
24.9222			378320
25.0222			376330
25.1222			378110
25.2222			384540
25.3222			377250
25.4222			380460
25.5222			380340
25.6222			381090
25.7222			384110
25.8222			385680
25.9222			381220
26.0222			383500
26.1222			388700
26.2222			381950
26.3222			385720
26.4222			383790
26.5222			381740
26.6222			381450
26.7222			381480
26.8222			383950
26.9222			385010
27.0222			382260
27.1222			387030
27.2222			388630
27.3222			385880
27.4222			383320
27.5222			387810
27.6222			382170
27.7222			389550
27.8222			393340
27.9222			387890
28.0222			385930
28.1222			388700
28.2222			391250
28.3222			389990
28.4222			389050
28.5222			394270
28.6222			390080
28.7222			388940
28.8222			390950
28.9222			386760
29.0222			389310
29.1222			393360
29.2222			391390
29.3222			396540
29.4222			385180
29.5222			386660
29.6222			393950
29.7222			391180
29.8222			386220
29.9222			390300
30.0222			394080
30.1222			390590
30.2222			389390
30.3222			393680
30.4222			390440
30.5222			401980
0.157777				86870
0.257777				114850
0.357777				141200
0.457777				166700
0.907777				284130
1.00778				312620
1.10778				336150
1.20778				361800
1.30778				383980
1.40778				406260
1.50778				430800
1.60778				447610
1.70778				477850
1.80778				498870
1.90778				523220
2.00778				542910
2.10778				565960
2.20778				582760
2.30778				606250
2.40778				622460
2.50778				643280
2.60778				661950
2.70778				683760
2.80778				695480
2.90778				722750
3.00778				741530
3.10778				756280
3.20778				770160
3.30778				792060
3.40778				805210
3.50778				827420
3.60778				839140
3.70778				860970
3.80778				881570
3.90778				903770
4.00778				911170
4.10778				927730
4.20778				938180
4.30778				951730
4.40778				964510
4.50778				982820
4.60778				1009220
4.70778				1012580
4.80778				1031770
4.90778				1046370
5.00778				1053540
5.10778				1070280
5.20778				1083250
5.30778				1103530
5.40778				1099870
5.50778				1118000
5.60778				1137420
5.70778				1142630
5.80778				1164570
5.90778				1171890
6.00778				1177430
6.10778				1193970
6.20778				1213660
6.30778				1219330
6.40778				1234020
6.50778				1234910
6.60778				1251560
6.70778				1253030
6.80778				1275360
6.90778				1297600
7.00778				1294980
7.10778				1307010
7.20778				1316420
7.30778				1331020
7.40778				1336780
7.50778				1350630
7.60778				1355100
7.70778				1360610
7.80778				1382180
7.90778				1397600
8.00778				1396690
8.10778				1416500
8.20778				1414140
8.30778				1430530
8.40778				1440410
8.50778				1436490
8.60778				1450610
8.70778				1462780
8.80778				1468010
8.90778				1477250
9.00778				1485760
9.10778				1489860
9.20778				1503350
9.30778				1502060
9.40778				1517840
9.50778				1514750
9.60778				1515420
9.70778				1547440
9.80778				1535840
9.90778				1548250
10.0078				1564600
10.1078				1566990
10.2078				1570950
10.3078				1574100
10.4078				1578160
10.5078				1587160
10.6078				1591170
10.7078				1599880
10.8078				1603660
10.9078				1605940
11.0078				1626740
11.1078				1616850
11.2078				1625860
11.3078				1634040
11.4078				1634870
11.5078				1636140
11.6078				1643810
11.7078				1638770
11.8078				1644410
11.9078				1648580
12.0078				1664420
12.1078				1661780
12.2078				1661900
12.3078				1667540
12.4078				1668050
12.5078				1673290
12.6078				1681290
12.7078				1679700
12.8078				1686740
12.9078				1687000
13.0078				1688650
13.1078				1696850
13.2078				1708690
13.3078				1708460
13.4078				1709120
13.5078				1706700
13.6078				1712540
13.7078				1708940
13.8078				1717910
13.9078				1722700
14.0078				1721150
14.1078				1718980
14.2078				1725860
14.3078				1729050
14.4078				1739860
14.5078				1743260
14.6078				1736690
14.7078				1745510
14.8078				1738490
14.9078				1740490
15.0078				1744650
15.1078				1752300
15.2078				1745750
15.3078				1743980
15.4078				1757070
15.5078				1760110
15.6078				1741850
15.7078				1757660
15.8078				1756840
15.9078				1756480
16.0078				1753830
16.1078				1753300
16.2078				1758680
16.3078				1766450
16.4078				1772160
16.5078				1754780
16.6078				1752480
16.7078				1768410
16.8078				1761850
16.9078				1768510
17.0078				1760690
17.1078				1758120
17.2078				1768380
17.3078				1773570
17.4078				1767910
17.5078				1777110
17.6078				1763480
17.7078				1774910
17.8078				1772410
17.9078				1765700
18.0078				1772920
18.1078				1766750
18.2078				1784150
18.3078				1776660
18.4078				1767740
18.5078				1775770
18.6078				1767700
18.7078				1777570
18.8078				1768500
18.9078				1769100
19.0078				1770210
19.1078				1770210
19.2078				1774850
19.3078				1776170
19.4078				1786650
0.143333					458300
0.243333					613000
0.343333					756820
0.443333					890900
0.893333					1415480
0.993333					1536490
1.09333					1613380
1.19333					1694190
1.29333					1795970
1.39333					1882490
1.49333					1951690
1.59333					2016120
1.69333					2095620
1.79333					2159010
1.89333					2235510
1.99333					2298820
2.09333					2344180
2.19333					2404230
2.29333					2453470
2.39333					2488920
2.49333					2538980
2.59333					2579230
2.69333					2611050
2.79333					2670650
2.89333					2700090
2.99333					2733620
3.09333					2765480
3.19333					2798530
3.29333					2834290
3.39333					2851340
3.49333					2882290
3.59333					2912720
3.69333					2922140
3.79333					2952390
3.89333					2953120
3.99333					2981030
4.09333					3012030
4.19333					3021600
4.29333					3046520
4.39333					3044900
4.49333					3066170
4.59333					3080220
4.69333					3104390
4.79333					3107300
4.89333					3133740
4.99333					3136460
5.09333					3162960
5.19333					3151500
5.29333					3157600
5.39333					3182230
5.49333					3183180
5.59333					3197920
5.69333					3178740
5.79333					3198970
5.89333					3195200
5.99333					3190660
6.09333					3199170
6.19333					3224460
6.29333					3213720
6.39333					3220940
6.49333					3241790
6.59333					3224640
6.69333					3250650
6.79333					3220070
6.89333					3242440
6.99333					3249180
7.09333					3249540
7.19333					3248370
7.29333					3245450
7.39333					3253570
7.49333					3246130
7.59333					3262600
7.69333					3244580
7.79333					3270080
7.89333					3270140
7.99333					3259760
8.09333					3262620
8.19333					3274310
8.29333					3258720
8.39333					3276700
8.49333					3273550
8.59333					3280260
0.128888						1320610
0.228888						1709260
0.328888						2036570
0.428888						2305990
0.878888						3131250
0.978888						3222050
1.07889						3322120
1.17889						3400700
1.27889						3485670
1.37889						3550680
1.47889						3599920
1.57889						3657900
1.67889						3703260
1.77889						3727160
1.87889						3747510
1.97889						3784240
2.07889						3799960
2.17889						3826790
2.27889						3839210
2.37889						3864140
2.47889						3882860
2.57889						3886350
2.67889						3906090
2.77889						3918260
2.87889						3927130
2.97889						3924150
3.07889						3943340
3.17889						3947460
3.27889						3949560
3.37889						3938030
3.47889						3947460
3.57889						3975290
3.67889						3960370
3.77889						3999580
3.87889						3981050
3.97889						3981180
4.07889						3996280
4.17889						3968250
4.27889						4000890
4.37889						4003530
4.47889						3999540
4.57889						3981220
4.67889						4004460
4.77889						3990150
4.87889						4001810
4.97889						4000870
5.07889						3990350
5.17889						4022630
0.114444							2543150
0.214444							3068850
0.314444							3404260
0.414444							3634510
0.864444							4076700
0.964444							4094140
1.06444							4134870
1.16444							4158610
1.26444							4199020
1.36444							4231940
1.46444							4262900
1.56444							4273530
1.66444							4311710
1.76444							4324030
1.86444							4322120
1.96444							4339970
2.06444							4361840
2.16444							4395100
2.26444							4393260
2.36444							4440660
2.46444							4428910
2.56444							4442610
2.66444							4442890
2.76444							4487930
2.86444							4500350
2.96444							4493830
3.06444							4482950
3.16444							4507660
3.26444							4522070
3.36444							4512850
3.46444							4537150
3.56444							4558320
3.66444							4558260
3.76444							4554620
3.86444							4568710
3.96444							4574370
4.06444							4585870
4.16444							4584080
4.26444							4582560
4.36444							4578810
4.46444							4580230
4.56444							4602090
4.66444							4621420
4.76444							4607930
4.86444							4585690
4.96444							4622630
5.06444							4629060
5.16444							4625040
5.26444							4626330
5.36444							4631640
5.46444							4615840
5.56444							4624370
5.66444							4621800
5.76444							4640410
5.86444							4650340
5.96444							4632230
6.06444							4651060
6.16444							4634690
6.26444							4647010
6.36444							4642980
6.46444							4638130
6.56444							4630340
6.66444							4670460
6.76444							4651570
6.86444							4650910
6.96444							4649670
7.06444							4676340
0.099999								3839610
0.199999								4153350
0.299999								4310670
0.399999								4410110
0.849999								4698670
0.949999								4730910
1.05								4794450
1.15								4847340
1.25								4897260
1.35								4921970
1.45								4956660
1.55								5005490
1.65								5036270
1.75								5088260
1.85								5109240
1.95								5151280
2.05								5180910
2.15								5229650
2.25								5229020
2.35								5260970
2.45								5280500
2.55								5321970
2.65								5341910
2.75								5327750
2.85								5393520
2.95								5416270
3.05								5448220
3.15								5461560
3.25								5464450
3.35								5488330
3.45								5506130
3.55								5541910
3.65								5553640
3.75								5565170
3.85								5578440
3.95								5562880
4.05								5582420
4.15								5611290
4.25								5623500
4.35								5628720
4.45								5642970
4.55								5645470
4.65								5672300
4.75								5662670
4.85								5688560
4.95								5688710
5.05								5686300
5.15								5685220
5.25								5701980
5.35								5735850
5.45								5713130
5.55								5746900
5.65								5720470
5.75								5743280
5.85								5733810
5.95								5740850
6.05								5784260
6.15								5742650
6.25								5755220
6.35								5748640
6.45								5782730
6.55								5789140
6.65								5779420
6.75								5786910
6.85								5772090
6.95								5776150
7.05								5806330
7.15								5803660
7.25								5795670
7.35								5811770
7.45								5796020
7.55								5789680
7.65								5821400
7.75								5824120
7.85								5806120
7.95								5805880
8.05								5801240
8.15								5804040
8.25								5825090

## Sheet: secondary data
GST-pep86 (nM)	rate		amplitude
0	0.2027	0.1691	0.0013805	0.0012736
1	0.08843	0.07922	0.0101459	0.0201352
3	0.08745	0.08911	0.0510747	0.0772651
10	0.1574	0.1685	0.332135	0.342119
32	0.5649	0.6076	0.642362	0.596266
100	1.665	1.953	0.781776	0.713907
316	3.892	5.117	0.872393	0.817598
1000	5.555	7.498	1	1
