# Supplementary material for: Towards a molecular mechanism underlying mitochondrial protein import through the TOM and TIM23 complexes
Source: eLife. 2022 Jun 8;11:e75426. doi: 10.7554/eLife.75426 (PMC9255969; doi:10.7554/eLife.75426)
Supplement: Figure 1—figure supplement 2—source data 2. [file elife-75426-fig1-figsupp2-data2.xlsx]

## Sheet: Sheet1
time	mitos 1 19.5.21	mitos 2 19.5.21	mitos 3 19.5.21	mitos 2 3.7.20	mitos 1 15.2.21	mitos 2 15.2.21	mitos 3 15.2.21	mitos 2 25.7.20
0.316667	0.001768
6.31667	0.006482
12.3167	0.01789
18.3167	0.031912
24.3167	0.049845
30.3167	0.070201
36.3167	0.093711
42.3167	0.117116
48.3167	0.143141
54.3167	0.169106
60.3167	0.197629
66.3167	0.219169
72.3167	0.246662
78.3167	0.27154
84.3167	0.299316
90.3167	0.327556
96.3167	0.34687
102.317	0.368061
108.317	0.392411
114.317	0.415091
120.317	0.438731
126.317	0.456861
132.317	0.475679
138.317	0.491594
144.317	0.513461
150.317	0.527455
156.317	0.542901
162.317	0.564675
168.317	0.576198
174.317	0.589543
180.317	0.605431
186.317	0.623386
192.317	0.633474
198.317	0.647971
204.317	0.659363
210.317	0.666679
216.317	0.684433
222.317	0.690478
228.317	0.703937
234.317	0.713038
240.317	0.725559
246.317	0.733956
252.317	0.737715
258.317	0.752435
264.317	0.76338
270.317	0.773549
276.317	0.767384
282.317	0.787642
288.317	0.793627
294.317	0.798139
300.317	0.802575
306.317	0.812084
312.317	0.813552
318.317	0.824666
324.317	0.829396
330.317	0.837754
336.317	0.847761
342.317	0.850652
348.317	0.851378
354.317	0.862808
360.317	0.871046
366.317	0.874413
372.317	0.881473
378.317	0.878941
384.317	0.885745
390.317	0.884566
396.317	0.893208
402.317	0.899161
408.317	0.905413
414.317	0.908354
420.317	0.904611
426.317	0.914268
432.317	0.917209
438.317	0.920515
444.317	0.92195
450.317	0.925294
456.317	0.934078
462.317	0.930096
468.317	0.934166
474.317	0.930374
480.317	0.939671
486.317	0.944767
492.317	0.943113
498.317	0.942622
504.317	0.946278
510.317	0.949595
516.317	0.953927
522.317	0.957981
528.317	0.954451
534.317	0.954773
540.317	0.956159
546.317	0.962771
552.317	0.966241
558.317	0.962727
564.317	0.967332
570.317	0.974278
576.317	0.964768
582.317	0.965466
588.317	0.969034
594.317	0.966023
600.317	0.973421
606.317	0.975723
612.317	0.974643
618.317	0.972597
624.317	0.979052
630.317	0.977404
636.317	0.973705
642.317	0.973585
648.317	0.979788
654.317	0.974796
660.317	0.98328
666.317	0.981108
672.317	0.982952
678.317	0.985058
684.317	0.988376
690.317	0.986837
696.317	0.983078
702.317	0.987661
708.317	0.982565
714.317	0.988779
720.317	0.981419
726.317	0.982778
732.317	0.978157
738.317	0.987836
744.317	0.980656
750.317	0.990727
756.317	0.983613
762.317	0.984737
768.317	0.980437
774.317	0.984911
780.317	0.988103
786.317	0.987896
792.317	0.986837
798.317	0.984786
804.317	0.983329
810.317	0.978773
816.317	0.987192
822.317	0.984737
828.317	0.984087
834.317	0.984622
840.317	0.99106
0.302222		0.002391
6.30222		0.008916
12.3022		0.023302
18.3022		0.039283
24.3022		0.061861
30.3022		0.089031
36.3022		0.114267
42.3022		0.142971
48.3022		0.168648
54.3022		0.2018
60.3022		0.232249
66.3022		0.265488
72.3022		0.29255
78.3022		0.318504
84.3022		0.344346
90.3022		0.372711
96.3022		0.400943
102.302		0.428144
108.302		0.450846
114.302		0.471962
120.302		0.49079
126.302		0.511809
132.302		0.527215
138.302		0.551333
144.302		0.568304
150.302		0.582658
156.302		0.60496
162.302		0.619048
168.302		0.629693
174.302		0.642134
180.302		0.66146
186.302		0.671741
192.302		0.683079
198.302		0.695622
204.302		0.706678
210.302		0.718386
216.302		0.734926
222.302		0.740738
228.302		0.754416
234.302		0.759454
240.302		0.767062
246.302		0.777789
252.302		0.782976
258.302		0.793621
264.302		0.800409
270.302		0.810141
276.302		0.811162
282.302		0.819375
288.302		0.826394
294.302		0.837306
300.302		0.841708
306.302		0.845797
312.302		0.858376
318.302		0.855662
324.302		0.863306
330.302		0.868903
336.302		0.871166
342.302		0.877876
348.302		0.88765
354.302		0.888973
360.302		0.895478
366.302		0.897956
372.302		0.905462
378.302		0.907842
384.302		0.905939
390.302		0.914609
396.302		0.918057
402.302		0.923875
408.302		0.927974
414.302		0.927486
420.302		0.930349
426.302		0.933258
432.302		0.938522
438.302		0.936675
444.302		0.948397
450.302		0.940333
456.302		0.949506
462.302		0.952122
468.302		0.954133
474.302		0.959089
480.302		0.956262
486.302		0.962111
492.302		0.957263
498.302		0.957996
504.302		0.967969
510.302		0.964327
516.302		0.967323
522.302		0.964106
528.302		0.969842
534.302		0.980272
540.302		0.969247
546.302		0.97211
552.302		0.973695
558.302		0.981211
564.302		0.982201
570.302		0.98314
576.302		0.986736
582.302		0.977024
588.302		0.983899
594.302		0.988014
600.302		0.980072
606.302		0.984592
612.302		0.981626
618.302		0.982858
624.302		0.982324
630.302		0.985064
636.302		0.986967
642.302		0.988655
648.302		0.981934
654.302		0.993046
660.302		0.990645
666.302		0.987167
672.302		0.990558
678.302		0.987998
684.302		0.991949
690.302		0.987829
696.302		0.990881
702.302		0.985741
708.302		0.983812
714.302		0.992179
720.302		0.9855
726.302		0.989117
732.302		0.989712
738.302		0.987716
744.302		0.996217
0.287778			0.00187
6.28778			0.006688
12.2878			0.017665
18.2878			0.02866
24.2878			0.049026
30.2878			0.06794
36.2878			0.091481
42.2878			0.113903
48.2878			0.139474
54.2878			0.163624
60.2878			0.190162
66.2878			0.212368
72.2878			0.241065
78.2878			0.264871
84.2878			0.295598
90.2878			0.315706
96.2878			0.340213
102.288			0.363372
108.288			0.386163
114.288			0.404886
120.288			0.432088
126.288			0.449341
132.288			0.469916
138.288			0.486111
144.288			0.501893
150.288			0.519779
156.288			0.532793
162.288			0.554162
168.288			0.568455
174.288			0.581813
180.288			0.592575
186.288			0.6072
192.288			0.628089
198.288			0.641656
204.288			0.648886
210.288			0.656903
216.288			0.672685
222.288			0.680426
228.288			0.686979
234.288			0.699125
240.288			0.709061
246.288			0.725299
252.288			0.7312
258.288			0.741432
264.288			0.751141
270.288			0.752446
276.288			0.764148
282.288			0.77347
288.288			0.777808
294.288			0.79076
300.288			0.795467
306.288			0.805496
312.288			0.810744
318.288			0.813003
324.288			0.824053
330.288			0.827708
336.288			0.82924
342.288			0.847102
348.288			0.847877
354.288			0.858903
360.288			0.855052
366.288			0.865321
372.288			0.871166
378.288			0.865524
384.288			0.87818
390.288			0.879614
396.288			0.884456
402.288			0.889391
408.288			0.891464
414.288			0.897937
420.288			0.898307
426.288			0.901223
432.288			0.908502
438.288			0.906607
444.288			0.906398
450.288			0.916981
456.288			0.920691
462.288			0.921595
468.288			0.919946
474.288			0.926745
480.288			0.929871
486.288			0.939826
492.288			0.939753
498.288			0.93763
504.288			0.947142
510.288			0.944546
516.288			0.945432
522.288			0.948668
528.288			0.949985
534.288			0.956322
540.288			0.952052
546.288			0.95751
552.288			0.961325
558.288			0.95847
564.288			0.957817
570.288			0.965662
576.288			0.963127
582.288			0.962561
588.288			0.966321
594.288			0.968567
600.288			0.960919
606.288			0.972074
612.288			0.971945
618.288			0.971975
624.288			0.966302
630.288			0.974726
636.288			0.974357
642.288			0.975772
648.288			0.977015
654.288			0.976836
660.288			0.975526
666.288			0.976485
672.288			0.982398
678.288			0.978571
684.288			0.983309
690.288			0.979691
696.288			0.974941
702.288			0.986029
708.288			0.990213
714.288			0.985149
720.288			0.987001
726.288			0.986355
732.288			0.981525
738.288			0.977888
744.288			0.981519
750.288			0.98494
756.288			0.987413
762.288			0.982589
768.288			0.98961
774.288			0.982657
780.288			0.983974
786.288			0.996839
0.273333				0.004841
6.27333				0.018153
12.2733				0.03984
18.2733				0.065705
24.2733				0.093852
30.2733				0.125252
36.2733				0.155873
42.2733				0.191636
48.2733				0.216013
54.2733				0.252209
60.2733				0.283583
66.2733				0.313193
72.2733				0.339782
78.2733				0.366808
84.2733				0.392985
90.2733				0.419398
96.2733				0.443252
102.273				0.465758
108.273				0.487627
114.273				0.502442
120.273				0.523983
126.273				0.540146
132.273				0.563271
138.273				0.58071
144.273				0.596606
150.273				0.608033
156.273				0.628488
162.273				0.639794
168.273				0.653775
174.273				0.672612
180.273				0.680942
186.273				0.693696
192.273				0.702916
198.273				0.714443
204.273				0.724905
210.273				0.735386
216.273				0.74711
222.273				0.750171
228.273				0.767254
234.273				0.778047
240.273				0.777298
246.273				0.794048
252.273				0.799689
258.273				0.806315
264.273				0.811055
270.273				0.814092
276.273				0.827695
282.273				0.835508
288.273				0.836986
294.273				0.844109
300.273				0.844637
306.273				0.856843
312.273				0.855802
318.273				0.865294
324.273				0.871502
330.273				0.872422
336.273				0.877469
342.273				0.883995
348.273				0.889831
354.273				0.890701
360.273				0.89337
366.273				0.894346
372.273				0.907421
378.273				0.904355
384.273				0.911428
390.273				0.912554
396.273				0.914379
402.273				0.919643
408.273				0.922061
414.273				0.929415
420.273				0.926077
426.273				0.936961
432.273				0.936142
438.273				0.924343
444.273				0.942582
450.273				0.945372
456.273				0.944215
462.273				0.945713
468.273				0.944919
474.273				0.94966
480.273				0.955954
486.273				0.956979
492.273				0.957884
498.273				0.953666
504.273				0.957568
510.273				0.961459
516.273				0.968914
522.273				0.956658
528.273				0.965355
534.273				0.965043
540.273				0.963816
546.273				0.967355
552.273				0.971724
558.273				0.974429
564.273				0.977249
570.273				0.969557
576.273				0.976103
582.273				0.977671
588.273				0.98393
594.273				0.980678
600.273				0.981904
606.273				0.98108
612.273				0.980934
618.273				0.984181
624.273				0.985499
630.273				0.985941
636.273				0.985448
642.273				0.990259
648.273				0.987791
654.273				0.987369
660.273				0.990878
666.273				0.98398
672.273				0.988545
678.273				0.998398
684.273				0.993517
690.273				0.99222
696.273				0.99229
702.273				0.996222
708.273				0.990752
714.273				1.00126
720.273				0.988238
726.273				0.991928
732.273				0.994693
738.273				0.992411
744.273				0.996629
750.273				0.99134
756.273				0.995141
762.273				0.993301
768.273				1.00335
774.273				0.995719
780.273				0.99961
786.273				0.998258
792.273				1.00023
798.273				0.998388
804.273				0.995613
810.273				0.996488
816.273				0.996966
822.273				1.00322
828.273				0.995025
834.273				0.997162
840.273				0.995719
846.273				0.996885
852.273				0.99773
858.273				0.993024
864.273				1.00242
870.273				0.994568
876.273				1.00588
0.258889					0.00576
6.25889					0.014437
12.2589					0.032256
18.2589					0.05662
24.2589					0.086437
30.2589					0.116617
36.2589					0.148692
42.2589					0.184539
48.2589					0.220605
54.2589					0.253347
60.2589					0.285039
66.2589					0.31566
72.2589					0.346214
78.2589					0.378031
84.2589					0.405295
90.2589					0.434388
96.2589					0.457396
102.259					0.482756
108.259					0.503693
114.259					0.523852
120.259					0.547591
126.259					0.566913
132.259					0.588007
138.259					0.601919
144.259					0.619922
150.259					0.635057
156.259					0.65341
162.259					0.663072
168.259					0.682485
174.259					0.697352
180.259					0.706123
186.259					0.722543
192.259					0.730762
198.259					0.742767
204.259					0.750723
210.259					0.766334
216.259					0.771452
222.259					0.782032
228.259					0.790028
234.259					0.80243
240.259					0.809118
246.259					0.815281
252.259					0.827148
258.259					0.830963
264.259					0.842327
270.259					0.844612
276.259					0.850475
282.259					0.860411
288.259					0.859317
294.259					0.871445
300.259					0.87753
306.259					0.880971
312.259					0.885136
318.259					0.889896
324.259					0.897047
330.259					0.899665
336.259					0.905607
342.259					0.910523
348.259					0.914819
354.259					0.920238
360.259					0.923575
366.259					0.927475
372.259					0.925341
378.259					0.932776
384.259					0.936729
390.259					0.9336
396.259					0.940498
402.259					0.941905
408.259					0.947647
414.259					0.953559
420.259					0.953204
426.259					0.959969
432.259					0.956476
438.259					0.95604
444.259					0.964737
450.259					0.963165
456.259					0.966112
462.259					0.972546
468.259					0.969776
474.259					0.971417
480.259					0.968951
486.259					0.970978
492.259					0.974426
498.259					0.976498
504.259					0.976326
510.259					0.976818
516.259					0.980607
522.259					0.975036
528.259					0.977587
534.259					0.980184
540.259					0.981513
546.259					0.984148
552.259					0.982852
558.259					0.984854
564.259					0.986402
570.259					0.989195
576.259					0.990133
582.259					0.987734
588.259					0.988135
594.259					0.988133
600.259					0.993173
0.244444						0.005956
6.24444						0.01784
12.2444						0.038367
18.2444						0.067772
24.2444						0.098812
30.2444						0.1353
36.2444						0.170907
42.2444						0.209534
48.2444						0.246668
54.2444						0.281211
60.2444						0.316934
66.2444						0.349641
72.2444						0.383075
78.2444						0.408372
84.2444						0.441547
90.2444						0.467827
96.2444						0.490772
102.244						0.518305
108.244						0.535616
114.244						0.562148
120.244						0.578692
126.244						0.598537
132.244						0.612617
138.244						0.636777
144.244						0.64852
150.244						0.664226
156.244						0.677166
162.244						0.694898
168.244						0.702412
174.244						0.715575
180.244						0.726941
186.244						0.743152
192.244						0.754231
198.244						0.762057
204.244						0.773057
210.244						0.78414
216.244						0.79064
222.244						0.798983
228.244						0.808477
234.244						0.822993
240.244						0.826107
246.244						0.833727
252.244						0.840941
258.244						0.843414
264.244						0.853709
270.244						0.864673
276.244						0.866578
282.244						0.876704
288.244						0.877571
294.244						0.884623
300.244						0.890937
306.244						0.892221
312.244						0.898977
318.244						0.904352
324.244						0.910017
330.244						0.914134
336.244						0.917902
342.244						0.916861
348.244						0.923509
354.244						0.927615
360.244						0.930389
366.244						0.933245
372.244						0.939459
378.244						0.939981
384.244						0.945108
390.244						0.943879
396.244						0.943996
402.244						0.947941
408.244						0.958817
414.244						0.957887
420.244						0.95742
426.244						0.960015
432.244						0.95843
438.244						0.965008
444.244						0.970033
450.244						0.965454
456.244						0.972261
462.244						0.970066
468.244						0.97046
474.244						0.971952
480.244						0.975813
486.244						0.97745
492.244						0.979192
498.244						0.978752
504.244						0.978876
510.244						0.983084
516.244						0.980626
522.244						0.981946
528.244						0.984821
534.244						0.988808
540.244						0.988173
546.244						0.98763
552.244						0.990361
558.244						0.993049
564.244						0.989181
570.244						0.989038
576.244						0.989338
582.244						0.989298
588.244						0.992815
594.244						0.993659
600.244						0.995935
606.244						0.992618
612.244						0.99314
618.244						0.992461
624.244						0.993319
630.244						0.993151
636.244						0.997012
642.244						0.993964
648.244						0.991979
654.244						0.99434
660.244						0.993471
666.244						0.998134
672.244						0.995968
678.244						0.992978
684.244						0.990224
690.244						0.989862
696.244						0.991628
702.244						0.994127
708.244						0.999257
0.23							0.005939
6.23							0.01563
12.23							0.033542
18.23							0.057581
24.23							0.086517
30.23							0.118425
36.23							0.151453
42.23							0.188399
48.23							0.221762
54.23							0.255475
60.23							0.290749
66.23							0.323301
72.23							0.353239
78.23							0.382449
84.23							0.413277
90.23							0.434915
96.23							0.467783
102.23							0.489477
108.23							0.512895
114.23							0.530499
120.23							0.553806
126.23							0.575261
132.23							0.590947
138.23							0.61291
144.23							0.625051
150.23							0.642484
156.23							0.658104
162.23							0.673434
168.23							0.68864
174.23							0.703662
180.23							0.715889
186.23							0.724201
192.23							0.738148
198.23							0.748131
204.23							0.75916
210.23							0.768673
216.23							0.777725
222.23							0.787304
228.23							0.795739
234.23							0.807248
240.23							0.813518
246.23							0.822166
252.23							0.83044
258.23							0.83467
264.23							0.84399
270.23							0.851516
276.23							0.859
282.23							0.864717
288.23							0.867223
294.23							0.877074
300.23							0.882263
306.23							0.887096
312.23							0.887459
318.23							0.895904
324.23							0.903097
330.23							0.905216
336.23							0.907075
342.23							0.914042
348.23							0.917743
354.23							0.919684
360.23							0.925521
366.23							0.92939
372.23							0.933488
378.23							0.936797
384.23							0.935947
390.23							0.939979
396.23							0.940236
402.23							0.946015
408.23							0.951717
414.23							0.950336
420.23							0.953172
426.23							0.954111
432.23							0.958885
438.23							0.96211
444.23							0.961739
450.23							0.96284
456.23							0.966933
462.23							0.966508
468.23							0.97203
474.23							0.967055
480.23							0.973607
486.23							0.975759
492.23							0.975454
498.23							0.980963
504.23							0.976031
510.23							0.979091
516.23							0.979806
522.23							0.97687
528.23							0.983631
534.23							0.984432
540.23							0.986986
546.23							0.986032
552.23							0.984211
558.23							0.986452
564.23							0.985152
570.23							0.989372
576.23							0.993571
582.23							0.98838
588.23							0.99216
594.23							0.989881
600.23							0.989886
606.23							0.988871
612.23							0.991496
618.23							0.991544
624.23							0.994535
630.23							0.990476
636.23							0.990921
642.23							0.991214
648.23							0.994907
654.23							0.989639
660.23							0.992139
666.23							0.987869
672.23							0.994576
678.23							0.996402
0.215555								0.006461
6.21556								0.017801
12.2156								0.036746
18.2156								0.061061
24.2156								0.092874
30.2156								0.125507
36.2156								0.16182
42.2156								0.192044
48.2156								0.233656
54.2156								0.263851
60.2156								0.301247
66.2156								0.332305
72.2156								0.360233
78.2156								0.390279
84.2156								0.418462
90.2156								0.44642
96.2156								0.471298
102.216								0.498427
108.216								0.520055
114.216								0.54322
120.216								0.558878
126.216								0.576085
132.216								0.600143
138.216								0.614888
144.216								0.636847
150.216								0.652313
156.216								0.663994
162.216								0.682684
168.216								0.697332
174.216								0.709482
180.216								0.717797
186.216								0.730213
192.216								0.741708
198.216								0.75411
204.216								0.764976
210.216								0.774614
216.216								0.784881
222.216								0.79529
228.216								0.803148
234.216								0.812797
240.216								0.817399
246.216								0.822593
252.216								0.833703
258.216								0.844809
264.216								0.850647
270.216								0.859523
276.216								0.861243
282.216								0.869506
288.216								0.875828
294.216								0.880146
300.216								0.886463
306.216								0.888982
312.216								0.892051
318.216								0.903191
324.216								0.906049
330.216								0.908995
336.216								0.916014
342.216								0.921944
348.216								0.920545
354.216								0.92085
360.216								0.930683
366.216								0.931779
372.216								0.930633
378.216								0.936447
384.216								0.941925
390.216								0.93903
396.216								0.948623
402.216								0.947758
408.216								0.951661
414.216								0.953034
420.216								0.953538
426.216								0.957878
432.216								0.963011
438.216								0.962233
444.216								0.966017
450.216								0.965622
456.216								0.971697
462.216								0.972699
468.216								0.976323
474.216								0.972326
480.216								0.973433
486.216								0.975247
492.216								0.976954
498.216								0.980783
504.216								0.975847
510.216								0.983105
516.216								0.980334
522.216								0.982319
528.216								0.985417
534.216								0.981901
540.216								0.987739
546.216								0.988541
552.216								0.985099
558.216								0.986514
564.216								0.987563
570.216								0.990563
576.216								0.988262
582.216								0.988491
588.216								0.988678
594.216								0.984673
600.216								0.990101
606.216								0.98922
612.216								0.987697
618.216								0.987897
624.216								0.984241
630.216								0.988704
636.216								0.990926
642.216								0.988675
648.216								0.989175
654.216								0.991615
0.201111
6.20111
12.2011
18.2011
24.2011
30.2011
36.2011
42.2011
48.2011
54.2011
60.2011
66.2011
72.2011
78.2011
84.2011
90.2011
96.2011
102.201
108.201
114.201
120.201
126.201
132.201
138.201
144.201
150.201
156.201
162.201
168.201
174.201
180.201
186.201
192.201
198.201
204.201
210.201
216.201
222.201
228.201
234.201
240.201
246.201
252.201
258.201
264.201
270.201
276.201
282.201
288.201
294.201
300.201
306.201
312.201
318.201
324.201
330.201
336.201
342.201
348.201
354.201
360.201
366.201
372.201
378.201
384.201
390.201
396.201
402.201
408.201
414.201
420.201
426.201
432.201
438.201
444.201
450.201
456.201
462.201
468.201
474.201
480.201
486.201
492.201
498.201
504.201
510.201
516.201
522.201
528.201
534.201
540.201
546.201
552.201
558.201
564.201
570.201
576.201
582.201
588.201
594.201
600.201
606.201
612.201
618.201
624.201
630.201
636.201
642.201
648.201
654.201
660.201
666.201
672.201
678.201
684.201
690.201
696.201
702.201
708.201
714.201
720.201
726.201
732.201
738.201
744.201
750.201
756.201
762.201
768.201
774.201
780.201
786.201
792.201
798.201
804.201
810.201
816.201
822.201
828.201
834.201
840.201
846.201
852.201
858.201
864.201
870.201
876.201
882.201
888.201
894.201
900.201
906.201
912.201
918.201
924.201
930.201
936.201
942.201
948.201
954.201
960.201
966.201
972.201
978.201
984.201
990.201
996.201
1002.2
1008.2
1014.2
1020.2
1026.2
1032.2
1038.2
1044.2
1050.2
1056.2
1062.2
1068.2
1074.2
1080.2
1086.2
1092.2
1098.2
1104.2
1110.2
1116.2
1122.2
1128.2
1134.2
1140.2
1146.2
1152.2
1158.2
1164.2
1170.2
1176.2
1182.2
1188.2
1194.2
1200.2
1206.2
1212.2
1218.2
1224.2
1230.2
1236.2
1242.2
1248.2
1254.2
1260.2
1266.2
1272.2
1278.2
1284.2
1290.2
1296.2
1302.2
1308.2
1314.2
1320.2
1326.2
1332.2
1338.2
1344.2
1350.2
1356.2
1362.2
1368.2
1374.2
1380.2
1386.2
1392.2
1398.2
1404.2
1410.2
1416.2
1422.2
1428.2
1434.2
1440.2
1446.2
1452.2
1458.2
1464.2
1470.2
1476.2
1482.2
1488.2
1494.2
1500.2
1506.2
1512.2
1518.2
1524.2
1530.2
1536.2
1542.2
1548.2
1554.2
1560.2
1566.2
1572.2
1578.2
1584.2
1590.2
1596.2
1602.2
1608.2
1614.2
1620.2
1626.2
1632.2
1638.2
1644.2
1650.2
1656.2
1662.2
1668.2
1674.2
1680.2
1686.2
1692.2
1698.2
1704.2
1710.2
1716.2
1722.2
1728.2
1734.2
1740.2
1746.2
1752.2
1758.2
1764.2
1770.2
1776.2
1782.2
0.186666
6.18667
12.1867
18.1867
24.1867
30.1867
36.1867
42.1867
48.1867
54.1867
60.1867
66.1867
72.1867
78.1867
84.1867
90.1867
96.1867
102.187
108.187
114.187
120.187
126.187
132.187
138.187
144.187
150.187
156.187
162.187
168.187
174.187
180.187
186.187
192.187
198.187
204.187
210.187
216.187
222.187
228.187
234.187
240.187
246.187
252.187
258.187
264.187
270.187
276.187
282.187
288.187
294.187
300.187
306.187
312.187
318.187
324.187
330.187
336.187
342.187
348.187
354.187
360.187
366.187
372.187
378.187
384.187
390.187
396.187
402.187
408.187
414.187
420.187
426.187
432.187
438.187
444.187
450.187
456.187
462.187
468.187
474.187
480.187
486.187
492.187
498.187
504.187
510.187
516.187
522.187
528.187
534.187
540.187
546.187
552.187
558.187
564.187
570.187
576.187
582.187
588.187
594.187
600.187
606.187
612.187
618.187
624.187
630.187
636.187
642.187
648.187
654.187
660.187
666.187
672.187
678.187
684.187
690.187
696.187
702.187
708.187
714.187
720.187
726.187
732.187
738.187
744.187
750.187
756.187
762.187
768.187
774.187
780.187
786.187
792.187
798.187
804.187
810.187
816.187
822.187
828.187
834.187
840.187
846.187
852.187
858.187
864.187
870.187
876.187
882.187
888.187
894.187
900.187
906.187
912.187
918.187
924.187
930.187
936.187
942.187
948.187
954.187
960.187
966.187
972.187
978.187
984.187
990.187
996.187
1002.19
1008.19
1014.19
1020.19
1026.19
1032.19
1038.19
1044.19
1050.19
1056.19
1062.19
1068.19
1074.19
1080.19
1086.19
1092.19
1098.19
1104.19
1110.19
1116.19
1122.19
1128.19
1134.19
1140.19
1146.19
1152.19
1158.19
1164.19
1170.19
1176.19
1182.19
1188.19
1194.19
1200.19
1206.19
1212.19
1218.19
1224.19
1230.19
1236.19
1242.19
1248.19
1254.19
1260.19
1266.19
1272.19
1278.19
1284.19
1290.19
1296.19
1302.19
1308.19
1314.19
1320.19
1326.19
1332.19
1338.19
1344.19
1350.19
1356.19
1362.19
1368.19
1374.19
1380.19
1386.19
1392.19
1398.19
1404.19
1410.19
1416.19
1422.19
1428.19
1434.19
1440.19
1446.19
1452.19
1458.19
1464.19
1470.19
1476.19
1482.19
1488.19
1494.19
1500.19
1506.19
1512.19
1518.19
1524.19
1530.19
1536.19
1542.19
1548.19
1554.19
1560.19
1566.19
1572.19
1578.19
1584.19
1590.19
1596.19
1602.19
1608.19
1614.19
1620.19
1626.19
1632.19
1638.19
1644.19
1650.19
1656.19
1662.19
1668.19
1674.19
1680.19
1686.19
1692.19
1698.19
1704.19
1710.19
1716.19
1722.19
1728.19
1734.19
1740.19
1746.19
1752.19
1758.19
0.172222
6.17222
12.1722
18.1722
24.1722
30.1722
36.1722
42.1722
48.1722
54.1722
60.1722
66.1722
72.1722
78.1722
84.1722
90.1722
96.1722
102.172
108.172
114.172
120.172
126.172
132.172
138.172
144.172
150.172
156.172
162.172
168.172
174.172
180.172
186.172
192.172
198.172
204.172
210.172
216.172
222.172
228.172
234.172
240.172
246.172
252.172
258.172
264.172
270.172
276.172
282.172
288.172
294.172
300.172
306.172
312.172
318.172
324.172
330.172
336.172
342.172
348.172
354.172
360.172
366.172
372.172
378.172
384.172
390.172
396.172
402.172
408.172
414.172
420.172
426.172
432.172
438.172
444.172
450.172
456.172
462.172
468.172
474.172
480.172
486.172
492.172
498.172
504.172
510.172
516.172
522.172
528.172
534.172
540.172
546.172
552.172
558.172
564.172
570.172
576.172
582.172
588.172
594.172
600.172
606.172
612.172
618.172
624.172
630.172
636.172
642.172
648.172
654.172
660.172
666.172
672.172
678.172
684.172
690.172
696.172
702.172
708.172
714.172
720.172
726.172
732.172
738.172
744.172
750.172
756.172
762.172
768.172
774.172
780.172
786.172
792.172
798.172
804.172
810.172
816.172
822.172
828.172
834.172
840.172
846.172
852.172
858.172
864.172
870.172
876.172
882.172
888.172
894.172
900.172
906.172
912.172
918.172
924.172
930.172
936.172
942.172
948.172
954.172
960.172
966.172
972.172
978.172
984.172
990.172
996.172
1002.17
1008.17
1014.17
1020.17
1026.17
1032.17
1038.17
1044.17
1050.17
1056.17
1062.17
1068.17
1074.17
1080.17
1086.17
1092.17
1098.17
1104.17
1110.17
1116.17
1122.17
1128.17
1134.17
1140.17
1146.17
1152.17
1158.17
1164.17
1170.17
1176.17
1182.17
1188.17
1194.17
1200.17
1206.17
1212.17
1218.17
1224.17
1230.17
1236.17
1242.17
1248.17
1254.17
1260.17
1266.17
1272.17
1278.17
1284.17
1290.17
1296.17
1302.17
1308.17
1314.17
1320.17
1326.17
1332.17
1338.17
1344.17
1350.17
1356.17
1362.17
1368.17
1374.17
1380.17
1386.17
1392.17
1398.17
1404.17
1410.17
1416.17
1422.17
1428.17
1434.17
1440.17
1446.17
1452.17
1458.17
1464.17
1470.17
1476.17
1482.17
1488.17
1494.17
1500.17
1506.17
1512.17
1518.17
1524.17
1530.17
1536.17
1542.17
1548.17
1554.17
1560.17
1566.17
1572.17
1578.17
1584.17
1590.17
1596.17
1602.17
1608.17
1614.17
1620.17
1626.17
1632.17
1638.17
1644.17
1650.17
1656.17
1662.17
1668.17
1674.17
1680.17
1686.17
1692.17
1698.17
1704.17
0.157777
6.15778
12.1578
18.1578
24.1578
30.1578
36.1578
42.1578
48.1578
54.1578
60.1578
66.1578
72.1578
78.1578
84.1578
90.1578
96.1578
102.158
108.158
114.158
120.158
126.158
132.158
138.158
144.158
150.158
156.158
162.158
168.158
174.158
180.158
186.158
192.158
198.158
204.158
210.158
216.158
222.158
228.158
234.158
240.158
246.158
252.158
258.158
264.158
270.158
276.158
282.158
288.158
294.158
300.158
306.158
312.158
318.158
324.158
330.158
336.158
342.158
348.158
354.158
360.158
366.158
372.158
378.158
384.158
390.158
396.158
402.158
408.158
414.158
420.158
426.158
432.158
438.158
444.158
450.158
456.158
462.158
468.158
474.158
480.158
486.158
492.158
498.158
504.158
510.158
516.158
522.158
528.158
534.158
540.158
546.158
552.158
558.158
564.158
570.158
576.158
582.158
588.158
594.158
600.158
606.158
612.158
618.158
624.158
630.158
636.158
642.158
648.158
654.158
660.158
666.158
672.158
678.158
684.158
690.158
696.158
702.158
708.158
714.158
720.158
726.158
732.158
738.158
744.158
750.158
756.158
762.158
768.158
774.158
780.158
786.158
792.158
[truncated: 1,072 more rows]
