# Supplementary material for: Towards a molecular mechanism underlying mitochondrial protein import through the TOM and TIM23 complexes
Source: eLife. 2022 Jun 8;11:e75426. doi: 10.7554/eLife.75426 (PMC9255969; doi:10.7554/eLife.75426)
Supplement: Figure 1—source data 1. [file elife-75426-fig1-data1.xlsx]

## Sheet: Sheet1
time (min)	y-Meas	fit
0.25889	0.011017	0.004928
0.35889	0.013767	0.009154
0.45889	0.017228	0.014471
0.55889	0.021864	0.020761
0.65889	0.027515	0.027917
0.75889	0.034077	0.03584
0.85889	0.041286	0.044439
0.95889	0.050624	0.053633
1.05889	0.060273	0.063347
1.15889	0.068718	0.073511
1.25889	0.080398	0.084063
1.35889	0.091656	0.094945
1.45889	0.102149	0.106106
1.55889	0.11416	0.117499
1.65889	0.125804	0.129079
1.75889	0.139266	0.140808
1.85889	0.149312	0.15265
1.95889	0.16311	0.164574
2.05889	0.175169	0.176549
2.15889	0.187346	0.18855
2.25889	0.200573	0.200552
2.35889	0.213079	0.212535
2.45889	0.227121	0.224478
2.55889	0.239907	0.236366
2.65889	0.251069	0.248181
2.75889	0.262715	0.25991
2.85889	0.27512	0.271542
2.95889	0.284434	0.283065
3.05889	0.297321	0.294469
3.15889	0.309013	0.305746
3.25889	0.320688	0.316888
3.35889	0.330294	0.32789
3.45889	0.342409	0.338746
3.55889	0.353861	0.34945
3.65889	0.361793	0.359999
3.75889	0.374177	0.37039
3.85889	0.387023	0.380619
3.95889	0.392361	0.390685
4.05889	0.405186	0.400586
4.15889	0.412738	0.410321
4.25889	0.421302	0.419889
4.35889	0.433702	0.42929
4.45889	0.439938	0.438523
4.55889	0.447592	0.447589
4.65889	0.460021	0.456488
4.75889	0.468468	0.465221
4.85889	0.473788	0.47379
4.95889	0.482771	0.482194
5.05889	0.490689	0.490436
5.15889	0.496338	0.498517
5.25889	0.508561	0.506438
5.35889	0.513168	0.514202
5.45889	0.520711	0.521811
5.55889	0.525847	0.529265
5.65889	0.534872	0.536568
5.75889	0.541988	0.54372
5.85889	0.550137	0.550726
5.95889	0.555425	0.557586
6.05889	0.56315	0.564303
6.15889	0.567865	0.570879
6.25889	0.572339	0.577317
6.35889	0.581424	0.583619
6.45889	0.588019	0.589787
6.55889	0.588125	0.595823
6.65889	0.597058	0.60173
6.75889	0.60423	0.60751
6.85889	0.610118	0.613166
6.95889	0.613477	0.618699
7.05889	0.619289	0.624113
7.15889	0.625421	0.629409
7.25889	0.630218	0.63459
7.35889	0.633664	0.639657
7.45889	0.644662	0.644614
7.55889	0.645183	0.649462
7.65889	0.650194	0.654204
7.75889	0.655222	0.658841
7.85889	0.658292	0.663376
7.95889	0.665589	0.667811
8.05889	0.667391	0.672148
8.15889	0.676314	0.676389
8.25889	0.677714	0.680536
8.35889	0.680789	0.68459
8.45889	0.687647	0.688555
8.55889	0.690166	0.692432
8.65889	0.691841	0.696222
8.75889	0.697734	0.699927
8.85889	0.701793	0.70355
8.95889	0.701268	0.707092
9.05889	0.709719	0.710555
9.15889	0.711209	0.713941
9.25889	0.715623	0.71725
9.35889	0.719857	0.720486
9.45889	0.720894	0.723649
9.55889	0.726506	0.726741
9.65889	0.730315	0.729763
9.75889	0.73398	0.732718
9.85889	0.736055	0.735606
9.95889	0.741179	0.73843
10.0589	0.740812	0.74119
10.1589	0.747128	0.743887
10.2589	0.749412	0.746525
10.3589	0.749931	0.749102
10.4589	0.74927	0.751622
10.5589	0.755738	0.754085
10.6589	0.756023	0.756492
10.7589	0.758824	0.758846
10.8589	0.765152	0.761146
10.9589	0.762925	0.763394
11.0589	0.76559	0.765591
11.1589	0.771897	0.767739
11.2589	0.771682	0.769839
11.3589	0.772574	0.771891
11.4589	0.772739	0.773896
11.5589	0.782249	0.775857
11.6589	0.781434	0.777773
11.7589	0.787229	0.779646
11.8589	0.78532	0.781476
11.9589	0.787819	0.783265
12.0589	0.789381	0.785014
12.1589	0.788344	0.786723
12.2589	0.792763	0.788394
12.3589	0.792036	0.790027
12.4589	0.795443	0.791622
12.5589	0.793118	0.793182
12.6589	0.799796	0.794707
12.7589	0.801202	0.796196
12.8589	0.801811	0.797653
12.9589	0.802088	0.799076
13.0589	0.804359	0.800467
13.1589	0.80623	0.801827
13.2589	0.806714	0.803156
13.3589	0.808697	0.804454
13.4589	0.815113	0.805724
13.5589	0.812398	0.806965
13.6589	0.813069	0.808177
13.7589	0.813417	0.809362
13.8589	0.812859	0.810521
13.9589	0.81603	0.811653
14.0589	0.815932	0.812759
14.1589	0.81623	0.813841
14.2589	0.819264	0.814898
14.3589	0.821025	0.815931
14.4589	0.822289	0.81694
14.5589	0.82371	0.817927
14.6589	0.822254	0.818891
14.7589	0.825398	0.819834
14.8589	0.823758	0.820755
14.9589	0.826238	0.821655
15.0589	0.824965	0.822535
15.1589	0.825473	0.823395
15.2589	0.822525	0.824236
15.3589	0.831745	0.825058
15.4589	0.825838	0.82586
15.5589	0.82728	0.826645
15.6589	0.827005	0.827412
15.7589	0.828603	0.828162
15.8589	0.832968	0.828894
15.9589	0.829561	0.82961
16.0589	0.834723	0.83031
16.1589	0.828422	0.830994
16.2589	0.832179	0.831663
16.3589	0.831068	0.832316
16.4589	0.834169	0.832955
16.5589	0.834583	0.833579
16.6589	0.834737	0.834189
16.7589	0.830672	0.834785
16.8589	0.834862	0.835367
16.9589	0.831706	0.835937
17.0589	0.834387	0.836493
17.1589	0.834821	0.837037
17.2589	0.83217	0.837569
17.3589	0.834931	0.838088
17.4589	0.834254	0.838596
17.5589	0.834764	0.839092
17.6589	0.833233	0.839577
17.7589	0.834371	0.840051
17.8589	0.834404	0.840515
17.9589	0.835575	0.840967
18.0589	0.835767	0.84141
18.1589	0.833677	0.841843
18.2589	0.834981	0.842265
18.3589	0.831126	0.842678
18.4589	0.839482	0.843082
18.5589	0.834206	0.843477
18.6589	0.835185	0.843863
