# Supplementary material for: Towards a molecular mechanism underlying mitochondrial protein import through the TOM and TIM23 complexes
Source: eLife. 2022 Jun 8;11:e75426. doi: 10.7554/eLife.75426 (PMC9255969; doi:10.7554/eLife.75426)
Supplement: Figure 1—source data 2. [file elife-75426-fig1-data2.xlsx]

## Sheet: primary data n=1
time	0	0.000251	0.000753	0.002258	0.006774	0.020322	0.060966	0.182899	0.548697	1.646091	4.938272	14.81481	44.44444	133.3333	400	1200
0	0.00063	0.000858	0.000422	0.000236	0.00031	0.000255	0.000273	0.000349	0.001038	0.001066	0.001244	0.002161	0.005248	0.009714	0.011819	0.014386
0.1	0.000658	0.000918	0.000541	0.000349	0.000265	0.000236	0.000299	0.000362	0.001306	0.001521	0.001743	0.003532	0.010794	0.019702	0.026745	0.029112
0.2	0.000682	0.001037	0.00053	0.000307	0.000318	0.000431	0.000348	0.000499	0.001555	0.002157	0.002859	0.00572	0.018474	0.03369	0.046929	0.048313
0.3	0.000759	0.001043	0.000586	0.000366	0.000403	0.000421	0.000476	0.000606	0.001974	0.002793	0.003857	0.008211	0.027674	0.049822	0.070822	0.069893
0.4	0.000913	0.001145	0.00071	0.000435	0.000479	0.000418	0.000565	0.000881	0.002408	0.003551	0.0054	0.011338	0.03915	0.067771	0.097282	0.095555
0.5	0.000902	0.001301	0.000728	0.000473	0.000577	0.000595	0.000778	0.000973	0.002669	0.004357	0.006695	0.014864	0.050248	0.089978	0.125798	0.121166
0.6	0.001074	0.001449	0.00076	0.000504	0.000586	0.000768	0.000915	0.001331	0.003197	0.005413	0.008643	0.017996	0.064691	0.110234	0.154051	0.14888
0.7	0.001053	0.001618	0.001084	0.00072	0.000713	0.000926	0.000911	0.001517	0.004008	0.006715	0.010255	0.022223	0.077649	0.132693	0.1822	0.174938
0.8	0.001121	0.001683	0.000981	0.000624	0.000869	0.000955	0.001063	0.001707	0.004406	0.007369	0.012141	0.026566	0.092274	0.154199	0.213175	0.204449
0.9	0.00121	0.001914	0.000981	0.000721	0.000838	0.001223	0.001257	0.002094	0.005184	0.008697	0.014362	0.031129	0.106307	0.173573	0.242666	0.232799
1	0.001235	0.001828	0.001157	0.000905	0.000947	0.001248	0.001418	0.002356	0.005371	0.00978	0.016701	0.035582	0.123163	0.197019	0.26746	0.257116
1.1	0.001319	0.00212	0.001285	0.001087	0.001087	0.001353	0.001459	0.002642	0.005943	0.01103	0.018789	0.041061	0.13665	0.216313	0.295883	0.285041
1.2	0.001462	0.002156	0.001123	0.001087	0.001243	0.001621	0.001919	0.003077	0.00675	0.012333	0.021044	0.046076	0.152196	0.236465	0.32188	0.30875
1.3	0.001425	0.002434	0.001413	0.001088	0.001378	0.001733	0.002057	0.003603	0.007392	0.014012	0.023989	0.051063	0.166889	0.259241	0.348369	0.334786
1.4	0.001608	0.002318	0.001514	0.0011	0.001543	0.001824	0.002408	0.004024	0.007883	0.015398	0.026436	0.055648	0.181381	0.278519	0.369571	0.360078
1.5	0.001779	0.002601	0.001685	0.001316	0.001519	0.002015	0.002604	0.004356	0.00819	0.01663	0.029346	0.062026	0.196974	0.296108	0.39353	0.380212
1.6	0.001771	0.002767	0.00166	0.001415	0.001761	0.002026	0.002556	0.004674	0.009517	0.017799	0.03109	0.066614	0.213673	0.316311	0.416274	0.39862
1.7	0.001808	0.00289	0.001771	0.001483	0.001829	0.002216	0.0029	0.005077	0.010386	0.020095	0.033911	0.072569	0.226462	0.332898	0.436648	0.426143
1.8	0.002063	0.002971	0.001774	0.001511	0.001821	0.00257	0.003218	0.005259	0.011041	0.021372	0.036768	0.07767	0.241173	0.351011	0.456122	0.445336
1.9	0.001826	0.003235	0.001706	0.001565	0.002003	0.002668	0.003407	0.006024	0.012436	0.02268	0.039136	0.083559	0.257096	0.365996	0.479598	0.463193
2	0.00208	0.003204	0.002125	0.001539	0.002369	0.002835	0.003709	0.006591	0.013029	0.024605	0.042362	0.088418	0.269135	0.378839	0.495943	0.481366
2.1	0.002169	0.003547	0.002083	0.001881	0.002417	0.00302	0.003767	0.006971	0.013575	0.02587	0.04481	0.09454	0.281737	0.394218	0.51032	0.500291
2.2	0.002169	0.003431	0.0023	0.001938	0.002276	0.003363	0.004276	0.007438	0.014061	0.027284	0.048115	0.09989	0.294076	0.409608	0.53086	0.51494
2.3	0.002148	0.00368	0.002258	0.001859	0.002559	0.003443	0.00439	0.007806	0.015411	0.028593	0.051249	0.105199	0.30621	0.425277	0.54458	0.530148
2.4	0.002201	0.00374	0.002455	0.001932	0.002684	0.003597	0.004793	0.00836	0.015837	0.031214	0.05366	0.110611	0.321415	0.437642	0.559601	0.547819
2.5	0.002495	0.003923	0.002505	0.00207	0.0029	0.003862	0.005004	0.008685	0.017085	0.032751	0.056254	0.116898	0.330094	0.448433	0.57445	0.564361
2.6	0.002573	0.00401	0.002608	0.002101	0.00321	0.004073	0.005199	0.009117	0.017494	0.034161	0.058998	0.121492	0.344111	0.458463	0.588659	0.57714
2.7	0.002339	0.004008	0.002728	0.002127	0.003257	0.004014	0.00533	0.009746	0.018301	0.035488	0.063329	0.127101	0.354432	0.476521	0.602124	0.588137
2.8	0.002695	0.004125	0.002612	0.002302	0.002931	0.004214	0.005819	0.00993	0.019928	0.03663	0.0657	0.133217	0.366589	0.489526	0.614476	0.603139
2.9	0.002684	0.004326	0.002697	0.002421	0.003469	0.004425	0.00639	0.010588	0.020183	0.038794	0.07012	0.137467	0.374985	0.497162	0.625395	0.613524
3	0.002809	0.00445	0.002835	0.002533	0.003613	0.004632	0.00619	0.010924	0.021151	0.040529	0.071695	0.144858	0.387722	0.511073	0.634298	0.628027
3.1	0.002814	0.004318	0.002731	0.002647	0.003532	0.004614	0.006458	0.011681	0.021976	0.042529	0.074523	0.149697	0.394682	0.519471	0.650299	0.639162
3.2	0.002773	0.004531	0.00308	0.002752	0.003691	0.005035	0.00691	0.012032	0.022917	0.044019	0.077776	0.155332	0.405704	0.5318	0.657535	0.64818
3.3	0.002744	0.004992	0.003046	0.002799	0.003949	0.005158	0.007085	0.012774	0.023703	0.045697	0.080513	0.160735	0.415461	0.541962	0.668922	0.660347
3.4	0.002676	0.004759	0.003197	0.002835	0.003873	0.005455	0.007174	0.013094	0.024735	0.046895	0.083298	0.165642	0.425818	0.552261	0.680171	0.672676
3.5	0.002952	0.004913	0.003144	0.002895	0.004001	0.005563	0.007741	0.013325	0.025817	0.048687	0.085772	0.170593	0.436828	0.563718	0.689571	0.680932
3.6	0.003101	0.005054	0.00311	0.003118	0.004386	0.005823	0.007941	0.013267	0.026351	0.051398	0.088024	0.174644	0.445959	0.569821	0.698275	0.691905
3.7	0.003186	0.005274	0.003285	0.003092	0.004541	0.005722	0.008297	0.014357	0.02723	0.052514	0.093156	0.179605	0.452522	0.580895	0.710262	0.703338
3.8	0.00317	0.005597	0.003457	0.003139	0.004195	0.00618	0.00845	0.014963	0.027968	0.054218	0.094771	0.185399	0.459092	0.586482	0.719914	0.711804
3.9	0.003023	0.005287	0.003548	0.003264	0.004544	0.006468	0.008856	0.015286	0.029386	0.056053	0.097818	0.191674	0.467701	0.596873	0.727015	0.718772
4	0.003223	0.005452	0.003547	0.003248	0.004918	0.006403	0.009088	0.015926	0.029609	0.056751	0.099636	0.195085	0.476768	0.604679	0.735577	0.72818
4.1	0.003212	0.005582	0.003748	0.003373	0.004875	0.006919	0.009286	0.016222	0.030967	0.058613	0.102622	0.200704	0.484225	0.613577	0.744925	0.736173
4.2	0.003379	0.005902	0.003917	0.00375	0.005161	0.006851	0.009761	0.017088	0.031375	0.059568	0.105271	0.206286	0.488928	0.619752	0.753688	0.743323
4.3	0.00334	0.005842	0.00375	0.003693	0.005238	0.007249	0.009615	0.017307	0.032237	0.062571	0.106983	0.210067	0.498728	0.625266	0.757438	0.750993
4.4	0.003459	0.005985	0.00379	0.0038	0.005272	0.007113	0.010167	0.017681	0.032986	0.063726	0.112053	0.2138	0.503932	0.633097	0.766951	0.760268
4.5	0.003324	0.005737	0.003767	0.003772	0.005259	0.007355	0.010337	0.01827	0.034109	0.065557	0.113823	0.218978	0.513322	0.64284	0.776025	0.766834
4.6	0.003382	0.005808	0.003988	0.003959	0.005451	0.007425	0.010851	0.018954	0.034733	0.066637	0.115785	0.222422	0.518704	0.648495	0.779818	0.776052
4.7	0.00359	0.006057	0.004057	0.003897	0.00573	0.007671	0.010482	0.019265	0.035758	0.067821	0.118558	0.228774	0.523981	0.654222	0.790036	0.777791
4.8	0.003417	0.006237	0.004019	0.00391	0.005828	0.007764	0.01121	0.020043	0.036431	0.069966	0.120791	0.233023	0.534111	0.660204	0.793234	0.78754
4.9	0.003767	0.006399	0.004023	0.004187	0.005803	0.007858	0.011925	0.020586	0.036889	0.072016	0.123509	0.238589	0.53605	0.666233	0.797754	0.796568
5	0.003454	0.006328	0.00405	0.004159	0.005936	0.007754	0.011843	0.021141	0.038971	0.073311	0.125279	0.241625	0.543554	0.672164	0.808741	0.802508
5.1	0.00398	0.006533	0.004032	0.004205	0.005928	0.008531	0.012009	0.020717	0.039132	0.074556	0.129052	0.246499	0.550662	0.681163	0.81297	0.808106
5.2	0.003573	0.006724	0.004494	0.004268	0.00624	0.008391	0.012615	0.021463	0.039517	0.075771	0.130993	0.250406	0.556792	0.684321	0.820091	0.811713
5.3	0.003725	0.006383	0.004367	0.004261	0.006263	0.008857	0.012407	0.021828	0.040551	0.078022	0.132733	0.255447	0.562886	0.68784	0.830078	0.820093
5.4	0.003847	0.00652	0.00449	0.004455	0.00645	0.008882	0.013094	0.022265	0.040939	0.0796	0.136116	0.260305	0.566213	0.694483	0.832014	0.825019
5.5	0.003797	0.006947	0.004391	0.004356	0.006638	0.008958	0.01319	0.022844	0.041853	0.080039	0.13859	0.262906	0.573183	0.700858	0.834794	0.832407
5.6	0.00381	0.006838	0.00483	0.005057	0.006412	0.009176	0.013112	0.023427	0.043104	0.082565	0.142018	0.266919	0.576934	0.70795	0.841106	0.838111
5.7	0.003824	0.006849	0.004637	0.004819	0.006827	0.00926	0.013752	0.023341	0.043335	0.083252	0.145036	0.270345	0.583202	0.712159	0.847068	0.844368
5.8	0.003857	0.006981	0.004513	0.004814	0.006671	0.009355	0.014066	0.024049	0.044362	0.085439	0.147171	0.274723	0.591663	0.715738	0.853878	0.848753
5.9	0.004175	0.006838	0.00469	0.004694	0.006602	0.009351	0.014661	0.024442	0.045112	0.086123	0.149436	0.279128	0.595492	0.721353	0.857305	0.851812
6	0.004014	0.006832	0.004945	0.004726	0.00703	0.009749	0.014789	0.024579	0.046643	0.088592	0.152121	0.284086	0.597266	0.728825	0.863447	0.858076
6.1	0.004188	0.00695	0.004926	0.004895	0.007395	0.009925	0.015232	0.025368	0.047865	0.090334	0.152502	0.285753	0.604879	0.72991	0.864248	0.863855
6.2	0.004018	0.007083	0.004903	0.005093	0.007325	0.010402	0.014937	0.026104	0.047085	0.091694	0.156922	0.289802	0.610175	0.738855	0.870708	0.872568
6.3	0.004182	0.00728	0.00491	0.004906	0.007416	0.010209	0.015447	0.02659	0.04817	0.091845	0.158409	0.292273	0.611702	0.739378	0.874543	0.868898
6.4	0.004049	0.007356	0.005061	0.004992	0.007507	0.010671	0.015083	0.026654	0.049593	0.093218	0.160284	0.298461	0.61611	0.742735	0.881323	0.876056
6.5	0.004271	0.007501	0.004747	0.005226	0.007545	0.010791	0.015674	0.026764	0.050609	0.09628	0.163575	0.301242	0.622072	0.750478	0.883918	0.881864
6.6	0.004001	0.007524	0.004934	0.005339	0.007772	0.010799	0.016155	0.027464	0.050995	0.096291	0.165071	0.304196	0.62547	0.753988	0.89018	0.88356
6.7	0.004445	0.007576	0.005082	0.005321	0.007632	0.01074	0.016397	0.02796	0.052227	0.098015	0.167258	0.307188	0.629562	0.755319	0.893693	0.890294
6.8	0.004416	0.007407	0.005088	0.005249	0.007811	0.011127	0.016526	0.027882	0.051549	0.098592	0.171013	0.310707	0.631606	0.760352	0.897605	0.88925
6.9	0.004081	0.00741	0.005335	0.005454	0.007974	0.011199	0.016337	0.028121	0.052664	0.1015	0.171846	0.315097	0.641051	0.761894	0.90108	0.894984
7	0.004424	0.007442	0.005348	0.005514	0.008159	0.011432	0.016539	0.02852	0.053682	0.102194	0.172988	0.317549	0.640648	0.765739	0.901385	0.897927
7.1	0.004448	0.007709	0.005403	0.005537	0.008008	0.011483	0.01654	0.029953	0.054227	0.103693	0.176665	0.320661	0.645941	0.767512	0.904308	0.902903
7.2	0.004451	0.00771	0.005498	0.005507	0.008162	0.011653	0.017138	0.030168	0.054717	0.103799	0.178653	0.326697	0.648109	0.776382	0.90687	0.905934
7.3	0.004333	0.008032	0.005329	0.005499	0.008071	0.011769	0.017497	0.03014	0.055263	0.105602	0.179893	0.328911	0.651619	0.779042	0.912256	0.90854
7.4	0.004523	0.007881	0.005399	0.005867	0.008497	0.011975	0.017725	0.030609	0.056927	0.107405	0.182216	0.329946	0.656956	0.783355	0.917063	0.916296
7.5	0.004359	0.007746	0.00565	0.005439	0.008245	0.011947	0.017762	0.030913	0.056569	0.107418	0.184997	0.333999	0.65757	0.785154	0.915833	0.918199
7.6	0.004352	0.007722	0.00578	0.005813	0.008661	0.012412	0.018212	0.031162	0.058321	0.109615	0.186089	0.337367	0.666961	0.785371	0.919113	0.918251
7.7	0.004512	0.008193	0.005624	0.006403	0.008701	0.01225	0.018698	0.031409	0.059136	0.109506	0.188758	0.340636	0.667211	0.793273	0.92396	0.92077
7.8	0.004655	0.008497	0.005668	0.005753	0.008857	0.012817	0.018755	0.032507	0.058881	0.111267	0.189879	0.342092	0.669481	0.797905	0.929222	0.927737
7.9	0.004658	0.007961	0.005834	0.006289	0.009103	0.012844	0.019377	0.031812	0.059879	0.113504	0.191809	0.345209	0.674827	0.800105	0.926552	0.930616
8	0.004604	0.00825	0.005763	0.006037	0.008994	0.012667	0.018589	0.032005	0.060254	0.113395	0.194763	0.349172	0.675467	0.803463	0.93013	0.929703
8.1	0.004734	0.00812	0.005923	0.006271	0.00908	0.012666	0.019564	0.032993	0.060985	0.114921	0.195731	0.353987	0.678749	0.804859	0.934484	0.934846
8.2	0.004477	0.008398	0.005897	0.00638	0.008987	0.013016	0.020028	0.032864	0.061373	0.116253	0.197387	0.356266	0.682919	0.809073	0.938214	0.934489
8.3	0.004586	0.008742	0.006083	0.006334	0.009371	0.013078	0.020197	0.034356	0.063584	0.117714	0.199789	0.357813	0.688091	0.81098	0.939379	0.939072
8.4	0.004568	0.008066	0.006141	0.006468	0.009454	0.013605	0.020428	0.03367	0.063133	0.118956	0.201317	0.361805	0.688268	0.814536	0.943062	0.941185
8.5	0.004684	0.008412	0.006027	0.006352	0.009506	0.013557	0.020392	0.033172	0.063976	0.12035	0.203284	0.366123	0.690692	0.816112	0.943129	0.943228
8.6	0.004931	0.008276	0.006317	0.006425	0.009398	0.013452	0.020753	0.033721	0.064741	0.12179	0.206632	0.365459	0.696188	0.816891	0.945929	0.94532
8.7	0.004531	0.008786	0.00604	0.00597	0.00961	0.01345	0.020545	0.035245	0.064969	0.122358	0.208163	0.370469	0.700766	0.820702	0.949551	0.948444
8.8	0.004794	0.008539	0.006209	0.006533	0.009488	0.013501	0.021062	0.035162	0.065615	0.123523	0.208116	0.371462	0.699513	0.82147	0.948059	0.947993
8.9	0.004747	0.00864	0.006226	0.006424	0.009891	0.013697	0.021258	0.034941	0.065854	0.125106	0.210319	0.375952	0.702748	0.826177	0.949872	0.951473
9	0.004887	0.009095	0.006109	0.006744	0.009681	0.014124	0.021151	0.035854	0.067228	0.127047	0.213132	0.378035	0.706124	0.827626	0.953589	0.957869
9.1	0.004789	0.008498	0.006087	0.006742	0.009772	0.014781	0.021749	0.036314	0.067397	0.127999	0.21344	0.379799	0.708536	0.831949	0.956119	0.955749
9.2	0.00465	0.008896	0.006497	0.006593	0.00993	0.014484	0.021767	0.036778	0.068016	0.127117	0.215883	0.382491	0.707976	0.832901	0.957024	0.95941
9.3	0.004687	0.008791	0.006531	0.007026	0.010105	0.014397	0.022269	0.036989	0.067443	0.129333	0.215865	0.385776	0.713082	0.838841	0.965119	0.957859
9.4	0.004729	0.009166	0.00655	0.006767	0.009983	0.014659	0.022303	0.037072	0.06845	0.131952	0.219285	0.387648	0.718097	0.839011	0.960938	0.959964
9.5	0.004754	0.008664	0.006624	0.006983	0.01051	0.014597	0.022457	0.036894	0.070275	0.132238	0.221772	0.38678	0.716539	0.841591	0.958995	0.966346
9.6	0.004893	0.009109	0.00624	0.00696	0.010277	0.015169	0.022738	0.037888	0.07005	0.134598	0.222978	0.390973	0.718284	0.839653	0.966013	0.962085
9.7	0.004645	0.00884	0.006661	0.007057	0.010591	0.014911	0.023304	0.037556	0.07013	0.13498	0.224164	0.396289	0.723907	0.845115	0.964481	0.964812
9.8	0.004858	0.008927	0.00645	0.007028	0.010433	0.015245	0.023403	0.038261	0.070846	0.135549	0.225361	0.397512	0.72474	0.846576	0.965144	0.966041
9.9	0.004819	0.008867	0.006313	0.006974	0.010316	0.015497	0.023828	0.0384	0.071054	0.137674	0.228331	0.400092	0.72722	0.847316	0.968942	0.969537
10	0.005105	0.00907	0.006477	0.007095	0.010144	0.015345	0.023611	0.039733	0.073228	0.137833	0.229128	0.399777	0.729398	0.849065	0.967407	0.973082
10.1	0.005031	0.008809	0.006807	0.007028	0.010565	0.015473	0.024004	0.039405	0.072837	0.138658	0.230708	0.402757	0.729445	0.852816	0.968369	0.973129
10.2	0.005038	0.009135	0.00688	0.007425	0.011119	0.015622	0.023677	0.039948	0.072738	0.140137	0.232426	0.403002	0.735192	0.852364	0.968863	0.972856
10.3	0.004953	0.009164	0.006429	0.007272	0.010804	0.015634	0.024221	0.039925	0.073204	0.139623	0.232508	0.409073	0.733429	0.853472	0.969274	0.976154
10.4	0.005199	0.00894	0.006843	0.007278	0.011064	0.015591	0.024455	0.04013	0.074408	0.1429	0.235216	0.405756	0.73867	0.854135	0.976472	0.973693
10.5	0.004971	0.009067	0.0067	0.007442	0.010904	0.016261	0.024589	0.040289	0.073992	0.143095	0.237226	0.410704	0.736363	0.855829	0.9806	0.977842
10.6	0.005043	0.008991	0.007039	0.007392	0.010874	0.016001	0.0248	0.041364	0.07536	0.144505	0.236774	0.411122	0.737845	0.85851	0.978454	0.979713
10.7	0.004799	0.009135	0.006594	0.007251	0.011044	0.016003	0.02474	0.040994	0.075384	0.144265	0.239321	0.41353	0.740907	0.861339	0.977882	0.977465
10.8	0.005053	0.009228	0.006872	0.007244	0.011343	0.016025	0.025154	0.042044	0.076979	0.145249	0.240041	0.415302	0.741237	0.85721	0.978635	0.981167
10.9	0.004971	0.00958	0.006804	0.007481	0.011478	0.016399	0.025667	0.041436	0.076708	0.147459	0.242143	0.418823	0.748648	0.86109	0.975601	0.982288
11	0.00496	0.009161	0.00676	0.007657	0.011101	0.016248	0.025443	0.042651	0.07625	0.146221	0.242889	0.42022	0.74428	0.866849	0.979973	0.979915
11.1	0.005118	0.009205	0.006918	0.007597	0.01133	0.016651	0.025459	0.042602	0.077163	0.14818	0.245138	0.422757	0.747605	0.867675	0.984675	0.985281
11.2	0.004864	0.009504	0.006932	0.007387	0.011296	0.016839	0.026044	0.041815	0.078159	0.150034	0.245086	0.424725	0.749277	0.865714	0.983028	0.985835
11.3	0.00476	0.009813	0.007002	0.007655	0.011428	0.01707	0.025708	0.042263	0.077652	0.151083	0.248887	0.427136	0.749992	0.86863	0.98124	0.988246
11.4	0.005215	0.009009	0.007106	0.007364	0.011543	0.016738	0.026524	0.043257	0.078708	0.151285	0.248442	0.42986	0.753725	0.870105	0.981206	0.985504
11.5	0.005096	0.009242	0.006593	0.007399	0.011714	0.016716	0.026291	0.043559	0.079472	0.151634	0.248934	0.430028	0.75683	0.875593	0.984426	0.985997
11.6	0.005118	0.009744	0.007039	0.007728	0.011821	0.016771	0.026615	0.042944	0.080698	0.15348	0.252364	0.431379	0.757995	0.875926	0.982443	0.988551
11.7	0.004989	0.009421	0.007108	0.007582	0.011835	0.016826	0.026961	0.043639	0.080144	0.152506	0.251948	0.432336	0.757512	0.871106	0.986735	0.989097
11.8	0.004924	0.009415	0.007129	0.008024	0.011415	0.017288	0.026457	0.043382	0.080776	0.154113	0.253214	0.434906	0.759735	0.87262	0.985019	0.987014
11.9	0.005122	0.009346	0.007244	0.007985	0.012024	0.017561	0.02723	0.043811	0.081195	0.156048	0.253717	0.438516	0.759184	0.874223	0.985422	0.990509
12	0.005103	0.009792	0.007368	0.007717	0.012061	0.017915	0.027373	0.044966	0.080627	0.156532	0.256273	0.437537	0.76158	0.875721	0.987773	0.991354
12.1	0.005254	0.00945	0.006908	0.007996	0.012183	0.017598	0.027175	0.044796	0.081754	0.157655	0.257304	0.441161	0.763637	0.876513	0.987861	0.991281
12.2	0.005127	0.009701	0.00702	0.00797	0.011985	0.017463	0.027617	0.044607	0.082105	0.158462	0.258934	0.4409	0.763337	0.877403	0.989001	0.992811
12.3	0.005113	0.009467	0.007195	0.007667	0.012248	0.017102	0.028621	0.044713	0.083057	0.15842	0.261618	0.445544	0.767237	0.880594	0.987731	0.992917
12.4	0.005202	0.009524	0.007399	0.008108	0.012294	0.017663	0.02821	0.046089	0.083332	0.159448	0.258763	0.444366	0.762152	0.879966	0.987994	0.994174
12.5	0.0051	0.009873	0.006875	0.008018	0.012207	0.017833	0.028111	0.045532	0.083392	0.15985	0.261354	0.445455	0.766662	0.880295	0.98738	0.992238
12.6	0.005105	0.009639	0.007078	0.007847	0.012339	0.018032	0.028416	0.046276	0.084025	0.160201	0.262839	0.447577	0.766691	0.879356	0.991162	0.99599
12.7	0.005109	0.009457	0.007093	0.008167	0.012224	0.018348	0.028488	0.046154	0.084391	0.160724	0.26396	0.449874	0.768261	0.882772	0.988665	0.996475
12.8	0.005205	0.009294	0.007228	0.008346	0.012196	0.018123	0.028595	0.046141	0.085129	0.161301	0.265169	0.452176	0.76796	0.882839	0.991082	0.996533
12.9	0.005092	0.009533	0.007369	0.008329	0.01261	0.018803	0.028497	0.04632	0.085406	0.162373	0.266873	0.452633	0.769954	0.882413	0.99535	0.995683
13	0.005043	0.009866	0.007026	0.00832	0.012115	0.018178	0.029003	0.046784	0.085574	0.163733	0.26759	0.451141	0.771996	0.881375	0.994233	0.996364
13.1	0.005127	0.009442	0.007447	0.008203	0.012516	0.018448	0.029398	0.046204	0.085884	0.165674	0.268508	0.454623	0.774153	0.886458	0.99183	0.99407
13.2	0.005155	0.009489	0.007473	0.008312	0.012666	0.017999	0.029571	0.045754	0.085348	0.166144	0.270846	0.454397	0.776332	0.885182	0.990043	0.998504
13.3	0.005269	0.00972	0.007364	0.00843	0.01283	0.018189	0.029739	0.047054	0.086267	0.165269	0.271292	0.457315	0.779216	0.88525	0.99452	0.996596
13.4	0.005161	0.009928	0.007563	0.008565	0.012297	0.018802	0.028623	0.047621	0.087497	0.16667	0.272368	0.45916	0.773897	0.887698	0.992047	0.997327
13.5	0.005252	0.009939	0.007215	0.008419	0.01306	0.01816	0.029103	0.047302	0.087507	0.167323	0.271453	0.461509	0.78051	0.888288	0.993965	0.996273
13.6	0.005062	0.009933	0.007593	0.008355	0.012446	0.01836	0.030496	0.047291	0.08727	0.168093	0.274511	0.459484	0.780348	0.88686	0.98957	0.994174
13.7	0.00548	0.009766	0.007335	0.008604	0.013117	0.018727	0.029994	0.048214	0.089008	0.169086	0.275721	0.46482	0.778741	0.8891	0.992891	0.996262
13.8	0.005158	0.010091	0.007433	0.008796	0.013034	0.019291	0.030164	0.04809	0.088664	0.166938	0.276983	0.463912	0.778991	0.89317	0.992316	0.99981
13.9	0.005101	0.009847	0.007722	0.008672	0.013028	0.019013	0.030424	0.049384	0.088839	0.171581	0.279315	0.464292	0.780973	0.888536	0.994458	0.99903
14	0.005311	0.009634	0.007686	0.008744	0.013078	0.019682	0.030663	0.04856	0.089695	0.170671	0.279765	0.465831	0.781581	0.891859	0.998941	0.997843
14.1	0.005057	0.009775	0.007881	0.008432	0.013574	0.019318	0.03151	0.049842	0.090709	0.171409	0.278351	0.469704	0.781802	0.890617	0.990335	0.99381
14.2	0.005451	0.009886	0.00747	0.008628	0.013013	0.019803	0.030748	0.04921	0.091123	0.171757	0.28138	0.469748	0.7811	0.891136	0.993773	0.999485
14.3	0.005145	0.009832	0.007395	0.00845	0.013159	0.019837	0.030301	0.049533	0.090072	0.173319	0.281612	0.471503	0.782819	0.89374	0.995027	0.998733
14.4	0.004992	0.010175	0.007467	0.008614	0.012813	0.019132	0.030223	0.049361	0.091525	0.172873	0.282548	0.470185	0.786853	0.887692	0.990041	1
14.5	0.005283	0.009795	0.007645	0.008568	0.013185	0.019721	0.030934	0.049418	0.090914	0.174499	0.282514	0.474588	0.787345	0.892145	0.995482	0.998926
14.6	0.005168	0.009637	0.007429	0.008747	0.013492	0.019486	0.031409	0.049481	0.091331	0.175609	0.283267	0.47374	0.785807	0.890986	0.994592	0.99665
14.7	0.005272	0.009738	0.007619	0.008879	0.013216	0.019928	0.031401	0.049725	0.091273	0.174626	0.283956	0.474635	0.786185	0.893688	0.994584	0.999053
14.8	0.005184	0.009775	0.007702	0.008848	0.013233	0.019905	0.032236	0.050133	0.09222	0.175802	0.286148	0.475944	0.789966	0.891722	0.996067	0.998621
14.9	0.004965	0.010026	0.00778	0.008818	0.013213	0.019736	0.031542	0.050206	0.092402	0.177597	0.284926	0.478831	0.788776	0.892856	0.993209	0.996622
15	0.005269	0.009788	0.0078	0.008987	0.012979	0.019796	0.031977	0.049824	0.091941	0.177461	0.287746	0.478172	0.787805	0.896885	0.994182	0.996133
15.1	0.005192	0.010193	0.007441	0.008828	0.013702	0.02029	0.032018	0.050215	0.093679	0.177686	0.290952	0.478443	0.785904	0.903559	0.991364	0.997877
15.2	0.005101	0.009931	0.007943	0.008905	0.012963	0.019916	0.032432	0.051163	0.092683	0.177756	0.287352	0.478493	0.791418	0.903657	0.98958	0.999054
15.3	0.005352	0.010224	0.008001	0.00919	0.013674	0.019741	0.032491	0.05173	0.093083	0.179532	0.289475	0.48113	0.786804	0.903195	0.988777	0.999004
15.4	0.005209	0.010238	0.007429	0.009194	0.0138	0.020545	0.032746	0.051361	0.093997	0.178268	0.290942	0.483409	0.789472	0.905107	0.992275	0.997987
15.5	0.005382	0.009756	0.007592	0.009259	0.013488	0.019911	0.033159	0.05189	0.093612	0.180525	0.29121	0.482256	0.791274	0.90405	0.991289	0.996952
15.6	0.005087	0.009991	0.007785	0.009103	0.013289	0.019924	0.032712	0.051122	0.093534	0.182036	0.29206	0.484685	0.792442	0.901805	0.99074	0.99783
15.7	0.005142	0.01011	0.007616	0.00922	0.013452	0.020054	0.033228	0.051959	0.093762	0.181149	0.29436	0.485715	0.791663	0.905463	0.989583	0.993303
15.8	0.005256	0.010225	0.008095	0.008986	0.013658	0.020357	0.033384	0.051635	0.094339	0.183262	0.294508	0.48627	0.789345	0.903873	0.989872	0.995774
15.9	0.005036	0.009974	0.007655	0.009104	0.013985	0.019812	0.032929	0.051632	0.095326	0.181589	0.29529	0.488681	0.796315	0.906284	0.990501	0.998203
16	0.005088	0.010089	0.007855	0.009163	0.013938	0.020532	0.033946	0.052526	0.095528	0.183126	0.294703	0.488785	0.795499	0.904188	0.989416	0.998453
16.1	0.00504	0.010146	0.007761	0.009113	0.013972	0.020654	0.033704	0.053075	0.096197	0.183754	0.296956	0.490332	0.792164	0.903561	0.988712	0.997641
16.2	0.005077	0.009894	0.00792	0.009093	0.013661	0.020693	0.033314	0.051806	0.095924	0.183927	0.297623	0.490977	0.793267	0.902934	0.984316	0.998013
16.3	0.005326	0.010039	0.008008	0.00913	0.013894	0.020475	0.033615	0.052576	0.097307	0.184542	0.299972	0.493047	0.792619	0.906523	0.991753	0.996346
16.4	0.005262	0.010209	0.008264	0.009358	0.013694	0.020537	0.034013	0.053409	0.096901	0.18625	0.299311	0.494353	0.793363	0.901574	0.988126	0.997396
16.5	0.005584	0.009899	0.008	0.008916	0.013722	0.021114	0.034193	0.053221	0.09742	0.186632	0.301371	0.494163	0.794378	0.904095	0.987139	0.995679
16.6	0.005179	0.010193	0.007927	0.009061	0.013998	0.021115	0.034526	0.053169	0.097294	0.18688	0.30056	0.492343	0.797361	0.906545	0.9895	0.9942
16.7	0.005215	0.009775	0.008113	0.009177	0.013894	0.020568	0.034512	0.052885	0.099011	0.187576	0.300596	0.495882	0.794203	0.907005	0.98263	0.997914
16.8	0.005139	0.010294	0.007964	0.009186	0.014111	0.021057	0.035232	0.05339	0.097143	0.187806	0.301913	0.49551	0.797757	0.90316	0.984097	0.995004
16.9	0.004966	0.010279	0.008069	0.009377	0.01393	0.020846	0.034296	0.054201	0.097354	0.189897	0.303197	0.496947	0.796328	0.90495	0.983845	0.993735
17	0.005122	0.010139	0.008053	0.009358	0.014315	0.021169	0.034101	0.053738	0.097534	0.188718	0.302998	0.499175	0.797558	0.904232	0.986434	0.996684
17.1	0.00542	0.009855	0.008325	0.009395	0.014544	0.020876	0.034741	0.055045	0.098257	0.190097	0.304259	0.500333	0.797473	0.902409	0.982543	0.995128
17.2	0.004871	0.010456	0.008094	0.009476	0.014222	0.021234	0.035391	0.054079	0.098777	0.18803	0.30546	0.499838	0.796045	0.903244	0.982738	0.994878
17.3	0.005264	0.010074	0.008121	0.009499	0.014415	0.021154	0.035431	0.05456	0.098213	0.191765	0.306766	0.499134	0.800503	0.901359	0.980513	0.998062
17.4	0.005265	0.009956	0.007858	0.009199	0.013951	0.021239	0.035654	0.05467	0.099609	0.190644	0.306776	0.500884	0.7997	0.906953	0.983491	0.992796
17.5	0.005254	0.01023	0.007912	0.009314	0.014191	0.021661	0.034941	0.055031	0.099804	0.191288	0.308914	0.499383	0.797933	0.904792	0.980745	0.993554
17.6	0.005064	0.010253	0.007962	0.009644	0.015148	0.021291	0.036237	0.054128	0.099636	0.192674	0.308441	0.500946	0.797876	0.903917	0.980979	0.994379
17.7	0.005191	0.009952	0.008165	0.009371	0.014443	0.021434	0.035935	0.054238	0.099895	0.192808	0.307214	0.503327	0.802932	0.905496	0.979115	0.994869
17.8	0.005241	0.010159	0.007935	0.009775	0.015067	0.021278	0.035168	0.05436	0.100112	0.195002	0.310761	0.505235	0.801405	0.905556	0.97792	0.993128
17.9	0.005225	0.010196	0.00819	0.009688	0.01495	0.021479	0.035524	0.055169	0.101692	0.192826	0.309624	0.503259	0.798826	0.903725	0.982435	0.992727
18	0.004984	0.010216	0.008464	0.009655	0.014587	0.02164	0.03632	0.055184	0.101547	0.193864	0.310563	0.502104	0.796094	0.907166	0.979064	0.99241
18.1	0.005007	0.010315	0.00813	0.009774	0.014654	0.02156	0.036214	0.056098	0.100239	0.195145	0.311372	0.506734	0.797762	0.902853	0.981928	0.989818
18.2	0.00515	0.010084	0.008248	0.009467	0.014345	0.021791	0.036216	0.055223	0.101112	0.195629	0.314549	0.504698	0.800253	0.903793	0.981822	0.991961
18.3	0.004992	0.010513	0.007982	0.009517	0.014542	0.022127	0.037228	0.055677	0.101269	0.195315	0.310624	0.507379	0.800384	0.901026	0.978423	0.989854
18.4	0.0054	0.010458	0.008437	0.009567	0.014964	0.02175	0.035786	0.055073	0.101893	0.195132	0.314572	0.505764	0.799876	0.902139	0.976604	0.990944
18.5	0.005043	0.010359	0.008121	0.009454	0.014308	0.022298	0.037123	0.056725	0.101937	0.198439	0.314728	0.506154	0.799543	0.903886	0.976331	0.987499
18.6	0.005238	0.010139	0.008112	0.009977	0.014532	0.022173	0.036694	0.056382	0.101294	0.196956	0.315935	0.508385	0.801793	0.901368	0.976929	0.98692
18.7	0.005231	0.01006	0.008479	0.00971	0.015091	0.022469	0.036484	0.056399	0.103784	0.197093	0.316163	0.511571	0.800427	0.904326	0.972711	0.987931
18.8	0.005196	0.010298	0.00811	0.009736	0.015125	0.022035	0.036487	0.056158	0.101934	0.198672	0.317404	0.508573	0.800274	0.900948	0.972274	0.986701
18.9	0.004885	0.0105	0.007941	0.010052	0.015068	0.022257	0.036991	0.055721	0.102852	0.198501	0.316972	0.509931	0.800955	0.902853	0.972892	0.988715
19	0.005278	0.010347	0.00825	0.010112	0.014953	0.022262	0.037072	0.057101	0.102086	0.198153	0.316904	0.510677	0.799907	0.899644	0.975567	0.987564
19.1	0.00495	0.010586	0.008177	0.009909	0.015171	0.022093	0.037212	0.056381	0.103263	0.19869	0.317396	0.512885	0.80073	0.899787	0.97579	0.984162
19.2	0.004958	0.010214	0.008386	0.009902	0.014841	0.022439	0.037668	0.057542	0.10428	0.199385	0.31969	0.511312	0.798451	0.900058	0.974058	0.983822
19.3	0.005144	0.010448	0.008224	0.0101	0.014942	0.022722	0.037742	0.056324	0.104104	0.198808	0.318258	0.512927	0.800854	0.898697	0.96656	0.984163
19.4	0.005403	0.010359	0.008253	0.009736	0.014714	0.022637	0.036921	0.056257	0.103656	0.201104	0.31692	0.513728	0.802102	0.901312	0.970846	0.983262
19.5	0.005251	0.010513	0.008123	0.009702	0.015167	0.022173	0.037742	0.056933	0.104062	0.2013	0.320999	0.514414	0.800778	0.898393	0.969533	0.982184
19.6	0.00517	0.010435	0.008074	0.009652	0.01552	0.022712	0.037415	0.057427	0.105121	0.2004	0.320962	0.513263	0.799492	0.899775	0.96756	0.98331
19.7	0.005459	0.010152	0.008175	0.010235	0.015322	0.022293	0.037941	0.057031	0.104855	0.203737	0.321381	0.515915	0.800046	0.897945	0.970775	0.984082
19.8	0.005049	0.010063	0.00845	0.009925	0.015587	0.02278	0.037727	0.057235	0.105168	0.20426	0.320289	0.515793	0.803104	0.903696	0.964957	0.985365
19.9	0.005145	0.010498	0.007988	0.009871	0.015158	0.021944	0.038084	0.057219	0.105066	0.202855	0.322999	0.517236	0.801801	0.897399	0.966076	0.981193
20	0.004986	0.010518	0.008232	0.010347	0.015206	0.022751	0.037116	0.058204	0.104627	0.20286	0.323277	0.519338	0.801247	0.895868	0.965816	0.979088
20.1	0.005285	0.010398	0.008316	0.010255	0.01538	0.023146	0.038781	0.057648	0.105868	0.204715	0.322807	0.515073	0.800016	0.895935	0.966338	0.981448
20.2	0.005147	0.010445	0.008186	0.010282	0.015689	0.023036	0.038242	0.057929	0.106068	0.205385	0.324135	0.518535	0.801799	0.89734	0.963106	0.981322
20.3	0.005293	0.010467	0.008333	0.010172	0.015665	0.022993	0.038328	0.058452	0.105248	0.204567	0.324763	0.520033	0.801351	0.898515	0.965659	0.980816
20.4	0.005075	0.010675	0.008424	0.009777	0.015639	0.022431	0.038656	0.059404	0.106725	0.206571	0.325592	0.516682	0.799975	0.894954	0.961706	0.978126
20.5	0.004927	0.01031	0.008432	0.010082	0.015481	0.023102	0.039309	0.057934	0.106556	0.206442	0.325912	0.518569	0.797389	0.896133	0.959253	0.976397
20.6	0.004986	0.010417	0.00874	0.010271	0.015569	0.023146	0.038692	0.059235	0.106989	0.206894	0.326143	0.520166	0.802771	0.895395	0.961254	0.978167
20.7	0.00472	0.010337	0.008682	0.010146	0.015379	0.02285	0.038478	0.058113	0.106502	0.206749	0.326182	0.51737	0.800631	0.895646	0.961584	0.978742
20.8	0.005005	0.010146	0.008456	0.010065	0.015647	0.023253	0.038931	0.05785	0.106679	0.207271	0.325135	0.522173	0.801845	0.895667	0.961323	0.976034
20.9	0.005077	0.010544	0.008373	0.010081	0.015978	0.023477	0.0393	0.059253	0.106858	0.206727	0.328237	0.520862	0.798815	0.895188	0.958692	0.980581
21	0.004999	0.010211	0.008544	0.010094	0.015453	0.023357	0.040482	0.05931	0.106975	0.206548	0.328823	0.521242	0.802615	0.892377	0.959475	0.974994
21.1	0.005129	0.010404	0.008383	0.010029	0.0159	0.023427	0.039868	0.058582	0.107578	0.207347	0.330154	0.519624	0.801829	0.892744	0.956613	0.977112
21.2	0.004838	0.010576	0.008451	0.010342	0.015975	0.023268	0.03927	0.059979	0.107485	0.20883	0.329496	0.523157	0.800133	0.889019	0.956307	0.973382
21.3	0.005096	0.010641	0.00861	0.010589	0.015777	0.024023	0.039355	0.059776	0.108554	0.207875	0.330861	0.522527	0.800483	0.89245	0.954941	0.970365
21.4	0.005291	0.010658	0.008438	0.010276	0.016022	0.023706	0.039522	0.05847	0.109503	0.20922	0.329533	0.524954	0.800193	0.889141	0.952595	0.970531
21.5	0.005135	0.010389	0.008204	0.010281	0.015643	0.023542	0.040005	0.06016	0.108262	0.208533	0.32966	0.521572	0.802095	0.890983	0.958363	0.972752
21.6	0.005114	0.010731	0.008584	0.010557	0.015905	0.023476	0.039527	0.059502	0.109443	0.209932	0.330164	0.523908	0.801717	0.891981	0.952912	0.972216
21.7	0.005106	0.010359	0.008658	0.010482	0.015832	0.023814	0.039932	0.059382	0.108219	0.209571	0.331545	0.527411	0.799775	0.88698	0.953198	0.970598
21.8	0.005057	0.010456	0.00849	0.009922	0.015593	0.023771	0.040066	0.059526	0.108245	0.209781	0.330167	0.52532	0.800393	0.886839	0.953922	0.967595
21.9	0.005061	0.010346	0.008388	0.010404	0.01558	0.023572	0.040635	0.060126	0.10942	0.210497	0.332342	0.526187	0.79844	0.890835	0.953453	0.970323
22	0.005207	0.010662	0.008737	0.010519	0.015767	0.023685	0.040593	0.060135	0.110135	0.212075	0.334982	0.526303	0.797574	0.892101	0.952085	0.967205
22.1	0.005252	0.01037	0.008	0.010591	0.016254	0.023988	0.040263	0.060762	0.109149	0.211838	0.333353	0.52576	0.801125	0.88897	0.951037	0.969092
22.2	0.005033	0.010246	0.008307	0.010973	0.016089	0.024444	0.040856	0.05997	0.109935	0.211355	0.335187	0.530004	0.797983	0.886314	0.947725	0.968479
22.3	0.005238	0.010526	0.008841	0.010926	0.01609	0.024148	0.041041	0.060629	0.110305	0.212153	0.335592	0.528239	0.79957	0.884143	0.949164	0.962421
22.4	0.005127	0.010383	0.008971	0.010567	0.016436	0.023931	0.040503	0.060826	0.10895	0.213132	0.334266	0.526282	0.800843	0.884944	0.946422	0.963565
22.5	0.005272	0.01069	0.00837	0.010797	0.015905	0.024059	0.040187	0.060005	0.110778	0.212994	0.337297	0.528223	0.799387	0.889194	0.950787	0.964833
22.6	0.005054	0.010487	0.008351	0.010947	0.015926	0.0246	0.041176	0.060665	0.110723	0.214869	0.337403	0.527822	0.797977	0.884459	0.946519	0.961488
22.7	0.005022	0.010747	0.008641	0.01075	0.016386	0.023936	0.041007	0.060702	0.111046	0.21511	0.33644	0.528142	0.797237	0.885862	0.949352	0.962811
22.8	0.005027	0.010411	0.008825	0.010349	0.015762	0.024178	0.04136	0.061214	0.112347	0.213553	0.336506	0.529068	0.799129	0.887638	0.943504	0.967283
22.9	0.005027	0.010542	0.008724	0.010682	0.016383	0.02381	0.041369	0.061729	0.112089	0.216034	0.338698	0.529053	0.795748	0.87939	0.943132	0.962838
23	0.005059	0.011046	0.008305	0.010766	0.015955	0.023884	0.041431	0.062642	0.111077	0.214751	0.335827	0.531199	0.796875	0.880689	0.943644	0.961097
23.1	0.00507	0.010295	0.008879	0.010794	0.016193	0.024774	0.04173	0.061011	0.112289	0.214331	0.339117	0.53096	0.8005	0.883963	0.94216	0.958767
23.2	0.005001	0.010528	0.008251	0.010692	0.01647	0.024577	0.040718	0.061544	0.113066	0.217522	0.338883	0.529133	0.79941	0.879744	0.940695	0.957565
23.3	0.005049	0.010401	0.008612	0.010846	0.015955	0.024847	0.042198	0.062033	0.113381	0.217316	0.33947	0.531792	0.799882	0.877778	0.942305	0.956718
23.4	0.004939	0.010451	0.008739	0.010711	0.016609	0.024488	0.041382	0.062057	0.113681	0.217019	0.338529	0.532548	0.797895	0.882386	0.940646	0.958203
23.5	0.005103	0.010698	0.008731	0.010729	0.016706	0.024194	0.042399	0.060621	0.111854	0.21666	0.342816	0.531115	0.796526	0.881984	0.940063	0.958166
23.6	0.005298	0.010692	0.008866	0.010809	0.016513	0.024095	0.04149	0.062322	0.114292	0.217025	0.342878	0.53238	0.798017	0.878077	0.942324	0.960038
23.7	0.00502	0.010593	0.008617	0.010982	0.016703	0.024959	0.041564	0.062087	0.113902	0.216715	0.340194	0.530286	0.797276	0.879227	0.938407	0.952148
23.8	0.005196	0.010672	0.008646	0.010653	0.01636	0.024938	0.041681	0.062488	0.113966	0.218182	0.341923	0.53181	0.795808	0.879255	0.936854	0.954519
23.9	0.005083	0.010502	0.008664	0.010839	0.016781	0.024901	0.04192	0.062238	0.114857	0.217917	0.341361	0.531852	0.797184	0.875201	0.938633	0.952514
24	0.004905	0.010563	0.008805	0.010532	0.016106	0.0246	0.041642	0.061521	0.113529	0.220511	0.343781	0.534538	0.795834	0.875937	0.941003	0.951708
24.1	0.00507	0.010969	0.00876	0.010833	0.01644	0.024553	0.042511	0.061825	0.113516	0.220104	0.343333	0.530075	0.795083	0.875673	0.933095	0.952649
24.2	0.005077	0.010685	0.008448	0.01107	0.016417	0.024814	0.042599	0.063308	0.11346	0.219992	0.344946	0.532332	0.79566	0.876119	0.933722	0.950058
24.3	0.00496	0.010688	0.008661	0.011173	0.016323	0.024834	0.042416	0.063081	0.115064	0.220796	0.34462	0.533349	0.792154	0.874292	0.934923	0.949447
24.4	0.005135	0.010206	0.009109	0.011135	0.01654	0.025097	0.042411	0.062281	0.115054	0.217979	0.344714	0.535004	0.795069	0.876766	0.933256	0.950714
24.5	0.005077	0.010523	0.008984	0.010768	0.016768	0.024886	0.042719	0.063082	0.115046	0.219426	0.345203	0.532541	0.795234	0.872344	0.931454	0.948896
24.6	0.005067	0.010513	0.008843	0.011046	0.016794	0.024987	0.042471	0.062436	0.113816	0.218512	0.345588	0.533752	0.796136	0.870514	0.93272	0.950777
24.7	0.005096	0.010567	0.008758	0.010796	0.016474	0.024853	0.043077	0.063955	0.115837	0.22081	0.346619	0.533587	0.795494	0.872146	0.934383	0.951934
24.8	0.005147	0.010102	0.008732	0.010895	0.016607	0.025377	0.04391	0.063503	0.114729	0.221797	0.345942	0.536247	0.794117	0.872154	0.930798	0.951066
24.9	0.005004	0.01094	0.00875	0.010958	0.01668	0.025235	0.042676	0.064101	0.114947	0.220914	0.34647	0.535722	0.791918	0.87392	0.931846	0.948509
25	0.005168	0.01042	0.008914	0.010828	0.017247	0.02505	0.043187	0.063799	0.116625	0.221485	0.345073	0.534458	0.795085	0.870865	0.927475	0.945614
25.1	0.004887	0.010453	0.008708	0.011246	0.016776	0.025003	0.043429	0.06382	0.115634	0.222675	0.346998	0.534624	0.795236	0.869647	0.927495	0.94115
25.2	0.004798	0.010943	0.008775	0.010919	0.016407	0.025515	0.043429	0.063966	0.116069	0.220931	0.345648	0.537127	0.792604	0.870576	0.922978	0.94206
25.3	0.005005	0.010721	0.008752	0.011026	0.016584	0.025414	0.043329	0.063173	0.116147	0.221953	0.346901	0.535756	0.793069	0.869733	0.927474	0.941127
25.4	0.004921	0.010999	0.008766	0.011091	0.017245	0.024988	0.044121	0.063711	0.116635	0.225018	0.349943	0.537376	0.794201	0.869046	0.925872	0.943362
25.5	0.00496	0.010222	0.00888	0.011346	0.017182	0.026015	0.044318	0.064069	0.116234	0.223611	0.349191	0.534595	0.791524	0.869341	0.923349	0.939368
25.6	0.004934	0.010677	0.008992	0.010497	0.017182	0.02542	0.043676	0.064059	0.118588	0.223273	0.348658	0.536824	0.790188	0.868294	0.924658	0.941393
25.7	0.004887	0.010284	0.009207	0.010755	0.017227	0.025674	0.043912	0.065281	0.116893	0.22546	0.349243	0.536123	0.79399	0.865751	0.923112	0.943744
25.8	0.005144	0.010849	0.008945	0.010904	0.017057	0.026182	0.045085	0.063591	0.11848	0.224762	0.348387	0.533781	0.792971	0.866357	0.923581	0.940599
25.9	0.004827	0.010528	0.008952	0.011348	0.016855	0.025404	0.043967	0.064809	0.117996	0.224986	0.350184	0.536395	0.791935	0.865813	0.919079	0.941904
26	0.004874	0.010735	0.008911	0.011335	0.017034	0.025791	0.044027	0.065042	0.116986	0.226164	0.35015	0.537491	0.793806	0.867264	0.919529	0.940573
26.1	0.005046	0.01045	0.009355	0.011174	0.016693	0.025568	0.04455	0.064355	0.117416	0.225731	0.349216	0.539231	0.789698	0.865673	0.920813	0.936286
26.2	0.004849	0.010555	0.008607	0.011173	0.017429	0.025599	0.043712	0.064238	0.118809	0.224713	0.350725	0.536031	0.79136	0.862187	0.917713	0.937126
26.3	0.004871	0.010779	0.009069	0.010986	0.017188	0.025336	0.044864	0.065589	0.118013	0.226352	0.351951	0.540084	0.79178	0.864204	0.918875	0.939993
26.4	0.005033	0.010862	0.008716	0.011343	0.017179	0.025929	0.044666	0.064931	0.117793	0.225928	0.352616	0.539577	0.792687	0.859759	0.919	0.934003
26.5	0.005087	0.010414	0.009129	0.011623	0.017104	0.024959	0.044398	0.064977	0.118568	0.226245	0.35085	0.538404	0.790957	0.861777	0.916491	0.934328
26.6	0.005139	0.010461	0.009056	0.011662	0.017325	0.026589	0.044375	0.065302	0.118086	0.226227	0.353717	0.538916	0.788705	0.857738	0.913495	0.932461
26.7	0.005036	0.01051	0.008908	0.011467	0.017057	0.025961	0.044851	0.065324	0.11838	0.225905	0.351537	0.53978	0.787846	0.863399	0.909418	0.93579
26.8	0.004944	0.010307	0.008775	0.011637	0.016877	0.025731	0.044661	0.066531	0.117787	0.227195	0.353131	0.54017	0.789524	0.863116	0.911479	0.931163
26.9	0.005018	0.010627	0.008978	0.01141	0.017244	0.026309	0.044684	0.065718	0.118623	0.228883	0.353204	0.53863	0.788526	0.860832	0.912623	0.928336
27	0.004991	0.010511	0.009026	0.010995	0.017037	0.026108	0.044238	0.065108	0.119289	0.226841	0.35293	0.538401	0.79082	0.858809	0.908743	0.933819
27.1	0.004838	0.010518	0.009114	0.011359	0.017747	0.026179	0.044482	0.064749	0.118599	0.224238	0.353893	0.541118	0.790034	0.85747	0.908966	0.928465
27.2	0.004832	0.010632	0.008906	0.01152	0.017832	0.026078	0.044612	0.064965	0.119237	0.228784	0.354543	0.538318	0.786868	0.85459	0.90888	0.931183
27.3	0.0049	0.010787	0.009303	0.011177	0.017385	0.02595	0.044669	0.065393	0.11977	0.22829	0.353313	0.539378	0.786598	0.8558	0.905606	0.928788
27.4	0.004986	0.01061	0.009085	0.011468	0.017648	0.025888	0.044097	0.066827	0.120622	0.228032	0.353259	0.541634	0.786835	0.856871	0.909985	0.927162
27.5	0.004921	0.010612	0.009268	0.011681	0.017596	0.025981	0.045012	0.066304	0.11967	0.226865	0.352163	0.538304	0.786754	0.856691	0.906391	0.926718
27.6	0.005119	0.010508	0.009231	0.011494	0.017486	0.025875	0.045782	0.066215	0.120878	0.22855	0.35454	0.541546	0.78625	0.852938	0.905432	0.92928
27.7	0.004906	0.010867	0.008957	0.011432	0.017453	0.026316	0.04532	0.067484	0.121531	0.230094	0.353085	0.540513	0.789439	0.851649	0.902979	0.926515
27.8	0.005044	0.010956	0.009145	0.011348	0.017572	0.025715	0.045389	0.06658	0.121002	0.229544	0.354551	0.541875	0.78504	0.855699	0.907245	0.926635
27.9	0.004833	0.010779	0.009026	0.011216	0.017863	0.026234	0.044913	0.066145	0.120883	0.229743	0.354284	0.544643	0.789322	0.853448	0.902807	0.924385
28	0.00484	0.010493	0.009002	0.011315	0.01766	0.026325	0.04514	0.066839	0.121041	0.227746	0.355933	0.539914	0.787709	0.853311	0.906134	0.920866
28.1	0.005197	0.010604	0.009088	0.011369	0.017876	0.026381	0.045593	0.066601	0.120989	0.23063	0.35658	0.537816	0.790117	0.850031	0.901322	0.922921
28.2	0.0051	0.010554	0.008903	0.01148	0.017807	0.026585	0.045956	0.067445	0.121765	0.231122	0.356167	0.541165	0.786918	0.849047	0.902133	0.922476
28.3	0.004866	0.010456	0.009356	0.01164	0.017305	0.027055	0.045433	0.06639	0.120386	0.231505	0.353752	0.539006	0.787735	0.850228	0.90076	0.923402
28.4	0.005106	0.010934	0.00919	0.011285	0.018045	0.026777	0.045805	0.067094	0.121812	0.231379	0.355742	0.540759	0.784192	0.851225	0.899655	0.918798
28.5	0.005129	0.010641	0.009108	0.011333	0.017652	0.026546	0.046203	0.066556	0.121392	0.230691	0.355583	0.540367	0.784648	0.850662	0.901413	0.91833
28.6	0.005238	0.010695	0.009031	0.011897	0.018144	0.026738	0.046229	0.066471	0.121905	0.233275	0.357409	0.543715	0.782674	0.84752	0.897738	0.914369
28.7	0.005132	0.010489	0.0091	0.011675	0.017687	0.026788	0.046017	0.066712	0.120753	0.23263	0.356393	0.541728	0.784387	0.85232	0.896923	0.915723
28.8	0.005074	0.010809	0.009262	0.011468	0.017905	0.02731	0.046142	0.067319	0.122415	0.234733	0.356588	0.547179	0.786151	0.846218	0.897998	0.915776
28.9	0.005007	0.010748	0.009228	0.011376	0.018085	0.026967	0.046495	0.066904	0.122141	0.232667	0.356916	0.54288	0.782791	0.848113	0.896997	0.918054
29	0.004755	0.010776	0.009361	0.011787	0.017824	0.026205	0.04558	0.067766	0.122912	0.234054	0.356647	0.544957	0.784786	0.850889	0.897238	0.912703
29.1	0.005041	0.010599	0.00939	0.011887	0.017853	0.027172	0.046186	0.067167	0.123531	0.233408	0.357461	0.543972	0.783147	0.843791	0.893717	0.914421
29.2	0.004945	0.010815	0.009221	0.011311	0.018264	0.026764	0.046295	0.067058	0.122464	0.233356	0.358739	0.544048	0.780853	0.843373	0.892507	0.913143
29.3	0.004944	0.010422	0.009043	0.011566	0.018142	0.026485	0.04612	0.067006	0.12263	0.233547	0.357119	0.544318	0.78317	0.842967	0.89129	0.91267
29.4	0.004936	0.010887	0.008752	0.011533	0.018015	0.027347	0.046372	0.068838	0.123273	0.233037	0.358971	0.545257	0.784496	0.843747	0.891058	0.916774
29.5	0.004874	0.010388	0.008906	0.011452	0.018176	0.027053	0.045863	0.067552	0.123473	0.235973	0.359009	0.543649	0.781245	0.841681	0.889488	0.912792
29.6	0.005158	0.010802	0.009156	0.012017	0.018257	0.026569	0.046341	0.067445	0.123942	0.234486	0.360396	0.544547	0.779913	0.838553	0.887802	0.90777
29.7	0.00494	0.010875	0.009119	0.011793	0.018256	0.027052	0.047208	0.067581	0.122682	0.234836	0.358404	0.541337	0.777424	0.840625	0.888557	0.908254
29.8	0.004861	0.011335	0.008992	0.011736	0.017635	0.027339	0.046276	0.067882	0.124176	0.235453	0.359863	0.542369	0.776904	0.838875	0.88825	0.908146
29.9	0.005077	0.010567	0.009358	0.011597	0.018206	0.026883	0.04611	0.068106	0.124243	0.233642	0.362047	0.543944	0.7779	0.842369	0.886238	0.910993
30	0.00494	0.010508	0.009132	0.011348	0.01817	0.027648	0.046817	0.068291	0.124181	0.235231	0.359872	0.543364	0.778216	0.838483	0.88396	0.905744
30.1	0.00484	0.010906	0.009264	0.011424	0.018248	0.026978	0.04618	0.067383	0.1255	0.235304	0.361436	0.544708	0.777398	0.840267	0.885602	0.90469
30.2	0.004817	0.010804	0.009087	0.011775	0.01766	0.027755	0.047199	0.067695	0.123666	0.234748	0.360864	0.54496	0.77648	0.838444	0.883339	0.904939
30.3	0.00483	0.010723	0.009119	0.012012	0.017993	0.027151	0.047561	0.068127	0.123687	0.235866	0.361025	0.543545	0.778345	0.838405	0.882329	0.903717
30.4	0.00523	0.01063	0.009268	0.011671	0.018423	0.027373	0.046225	0.068582	0.124297	0.237071	0.35986	0.545101	0.779547	0.837184	0.878387	0.903281

## Sheet: primary data n=2
time	0	0.000251	0.000753	0.002258	0.006774	0.020322	0.060966	0.182899	0.548697	1.646091	4.938272	14.81481	44.44444	133.3333	400	1200
0	0.001582	0.00122	0.000973	0.000872	0.000909	0.0013	0.001953	0.002009	0.00236	0.002967	0.003582	0.004458	0.006481	0.010601	0.016858	0.020379
0.1	0.001446	0.001372	0.001098	0.001039	0.000896	0.001333	0.001883	0.002019	0.002588	0.003044	0.003699	0.005451	0.011582	0.019957	0.033144	0.037252
0.2	0.001537	0.001428	0.00107	0.000929	0.000874	0.001385	0.001849	0.002289	0.002598	0.003043	0.003999	0.007685	0.019035	0.034264	0.053743	0.057928
0.3	0.001479	0.001402	0.001176	0.000904	0.001062	0.001458	0.001935	0.002482	0.002538	0.003407	0.004408	0.009925	0.027543	0.052204	0.080562	0.083283
0.4	0.00158	0.001692	0.001204	0.001046	0.001039	0.001568	0.002099	0.002522	0.002733	0.003897	0.004799	0.013184	0.039499	0.071353	0.10674	0.109155
0.5	0.001527	0.001521	0.001047	0.001103	0.001013	0.001662	0.002057	0.002672	0.002842	0.004016	0.005469	0.015877	0.051093	0.091294	0.136147	0.136658
0.6	0.001547	0.001432	0.001244	0.001088	0.001059	0.001826	0.002533	0.00281	0.003117	0.004585	0.006186	0.01965	0.063899	0.113949	0.165653	0.167703
0.7	0.001657	0.001653	0.001283	0.001189	0.001125	0.00176	0.002378	0.002894	0.003137	0.004781	0.006518	0.023538	0.078746	0.137379	0.19575	0.196924
0.8	0.0017	0.001618	0.001283	0.001186	0.001171	0.00189	0.002619	0.00299	0.003425	0.005235	0.006848	0.027529	0.09483	0.16048	0.225805	0.224746
0.9	0.001796	0.001667	0.001255	0.00126	0.001235	0.001989	0.002696	0.00332	0.003666	0.005614	0.008022	0.032275	0.10977	0.184664	0.253574	0.252921
1	0.001621	0.001616	0.001443	0.001197	0.001305	0.00202	0.002624	0.003354	0.003881	0.00634	0.008696	0.036499	0.124316	0.207264	0.282891	0.282818
1.1	0.001591	0.001555	0.001397	0.001326	0.001547	0.002094	0.002924	0.003704	0.004207	0.006889	0.00962	0.041936	0.139347	0.230461	0.309565	0.308589
1.2	0.001803	0.001694	0.001314	0.001276	0.001443	0.00216	0.003109	0.003648	0.004354	0.007492	0.010593	0.046343	0.155296	0.253366	0.335497	0.336376
1.3	0.001751	0.001728	0.001347	0.001296	0.001461	0.002245	0.003325	0.004143	0.004586	0.007764	0.011241	0.051896	0.171298	0.274857	0.361637	0.361858
1.4	0.001897	0.001722	0.001559	0.001385	0.001458	0.002296	0.003125	0.004196	0.004933	0.008591	0.0121	0.057063	0.185473	0.295223	0.386253	0.386547
1.5	0.001826	0.001869	0.001455	0.001436	0.00171	0.002536	0.003534	0.004695	0.00531	0.009031	0.01309	0.062581	0.202081	0.314575	0.406599	0.410379
1.6	0.001826	0.001747	0.00155	0.001488	0.001816	0.002655	0.003477	0.004638	0.005752	0.010021	0.014777	0.067903	0.215161	0.336691	0.429261	0.431758
1.7	0.001869	0.001798	0.001557	0.001659	0.001756	0.002561	0.003613	0.005076	0.005997	0.010423	0.015127	0.072597	0.229883	0.354112	0.452484	0.45302
1.8	0.001747	0.001857	0.00188	0.001644	0.001779	0.002736	0.003861	0.005108	0.006366	0.011099	0.016322	0.079355	0.245242	0.371541	0.467869	0.472136
1.9	0.001921	0.001882	0.001748	0.0016	0.001972	0.002759	0.004189	0.005492	0.006735	0.011851	0.017284	0.084067	0.261309	0.389834	0.491309	0.491316
2	0.00174	0.001911	0.001722	0.001715	0.002085	0.002942	0.004243	0.005393	0.007062	0.012069	0.018829	0.090035	0.274645	0.404007	0.506998	0.512045
2.1	0.00171	0.00208	0.001849	0.001715	0.002071	0.002939	0.004319	0.005937	0.007281	0.013458	0.019718	0.097114	0.288143	0.421183	0.524055	0.529289
2.2	0.001809	0.00205	0.001745	0.001547	0.002103	0.003137	0.004341	0.006419	0.007915	0.013898	0.021384	0.103077	0.302162	0.435947	0.539115	0.544798
2.3	0.001916	0.002073	0.001867	0.001834	0.002296	0.003193	0.004575	0.00633	0.007822	0.014858	0.022263	0.108406	0.315639	0.4528	0.555263	0.560505
2.4	0.001893	0.00207	0.001956	0.001974	0.002179	0.003204	0.004717	0.006978	0.008345	0.015354	0.023575	0.113601	0.326689	0.46573	0.568361	0.579356
2.5	0.001971	0.002154	0.001806	0.001811	0.00222	0.003491	0.004908	0.007017	0.008899	0.01642	0.024242	0.119553	0.339122	0.477732	0.583472	0.597339
2.6	0.002088	0.002045	0.00193	0.001865	0.002264	0.003585	0.004949	0.007166	0.00947	0.017061	0.025467	0.126	0.352385	0.491552	0.59703	0.613783
2.7	0.001878	0.002223	0.002015	0.002025	0.002447	0.003778	0.005358	0.007341	0.0094	0.01792	0.026801	0.132913	0.363347	0.504591	0.61216	0.625296
2.8	0.00187	0.002189	0.002062	0.002139	0.002416	0.003699	0.00538	0.007872	0.009651	0.018821	0.028327	0.13719	0.373729	0.519994	0.622509	0.640111
2.9	0.001925	0.002271	0.00186	0.002053	0.002431	0.004004	0.00554	0.008322	0.010309	0.019896	0.029707	0.145274	0.386349	0.533285	0.63456	0.65234
3	0.001855	0.002332	0.002098	0.002241	0.002596	0.003749	0.005744	0.008766	0.011183	0.020287	0.030538	0.150919	0.397351	0.541973	0.648506	0.667115
3.1	0.001959	0.002477	0.002106	0.002223	0.002573	0.004215	0.005822	0.00864	0.011337	0.021288	0.031757	0.155794	0.402686	0.554024	0.658935	0.675866
3.2	0.001875	0.002271	0.002217	0.002241	0.002652	0.00405	0.00597	0.008858	0.011765	0.021954	0.032694	0.162696	0.4138	0.564539	0.666993	0.686126
3.3	0.002062	0.002271	0.002311	0.002193	0.002838	0.004286	0.005939	0.009455	0.012432	0.022352	0.034254	0.16765	0.422821	0.574659	0.677677	0.698775
3.4	0.002053	0.002494	0.002278	0.002291	0.002644	0.004613	0.006105	0.009631	0.012386	0.023661	0.036164	0.173499	0.433467	0.582539	0.686117	0.706324
3.5	0.002086	0.002703	0.002123	0.002401	0.002959	0.004425	0.006518	0.009709	0.012783	0.024436	0.036776	0.179574	0.444556	0.591466	0.700121	0.716453
3.6	0.002015	0.002367	0.002434	0.002381	0.002883	0.004431	0.006585	0.010154	0.013065	0.025569	0.037854	0.18465	0.454214	0.60306	0.707753	0.727264
3.7	0.002184	0.00267	0.002198	0.002306	0.003013	0.004636	0.006833	0.010717	0.013707	0.025754	0.039251	0.189596	0.45975	0.610702	0.71639	0.739311
3.8	0.002215	0.0027	0.002378	0.002421	0.003104	0.004883	0.006988	0.010392	0.013974	0.02688	0.040506	0.192959	0.469213	0.619242	0.724364	0.744061
3.9	0.002081	0.00268	0.002236	0.002381	0.003328	0.00488	0.006796	0.010725	0.014398	0.027601	0.041773	0.200361	0.478068	0.625464	0.734619	0.756149
4	0.002118	0.00281	0.002348	0.002705	0.003178	0.004933	0.007248	0.011094	0.015075	0.028695	0.043254	0.205511	0.487953	0.63468	0.742135	0.763127
4.1	0.002273	0.002757	0.002324	0.002688	0.003407	0.004793	0.00723	0.011327	0.015184	0.029151	0.044867	0.211623	0.491661	0.642306	0.749436	0.775452
4.2	0.002151	0.002589	0.002525	0.002634	0.003237	0.004992	0.007196	0.011577	0.015435	0.029951	0.045759	0.215954	0.499994	0.650275	0.759342	0.777513
4.3	0.00235	0.002729	0.002619	0.002639	0.003414	0.005246	0.007822	0.012023	0.016179	0.030811	0.046963	0.220806	0.510475	0.655817	0.76666	0.790461
4.4	0.002165	0.002749	0.002429	0.00252	0.003612	0.004943	0.007555	0.012321	0.015862	0.03216	0.047903	0.226775	0.514798	0.665539	0.772828	0.796735
4.5	0.002207	0.002774	0.002504	0.002654	0.003622	0.00553	0.007918	0.012188	0.016542	0.032973	0.049052	0.231737	0.524845	0.670217	0.779725	0.803838
4.6	0.002385	0.002708	0.002586	0.002779	0.003496	0.005221	0.008185	0.01263	0.01718	0.033075	0.049887	0.236084	0.532024	0.677144	0.785741	0.808479
4.7	0.002342	0.002949	0.002776	0.002525	0.003668	0.005408	0.007826	0.013124	0.017315	0.034142	0.052196	0.241937	0.53563	0.684043	0.793135	0.815564
4.8	0.002164	0.002881	0.00284	0.002759	0.003877	0.005621	0.008063	0.013449	0.01732	0.03516	0.052753	0.245272	0.540784	0.688567	0.79718	0.82582
4.9	0.002154	0.00286	0.002677	0.002728	0.003844	0.005627	0.00863	0.013914	0.018869	0.035859	0.054318	0.252321	0.550971	0.696656	0.803729	0.832175
5	0.002268	0.002939	0.002848	0.002965	0.003912	0.005871	0.008533	0.01388	0.018743	0.037612	0.056169	0.256056	0.557593	0.700825	0.808207	0.839786
5.1	0.002149	0.003015	0.002842	0.002922	0.003856	0.005734	0.008378	0.013873	0.019071	0.037882	0.056896	0.259241	0.56121	0.70874	0.812808	0.843452
5.2	0.002401	0.003066	0.003049	0.002863	0.003755	0.006287	0.008817	0.014633	0.019271	0.038283	0.058727	0.266552	0.565605	0.708685	0.818086	0.846906
5.3	0.002259	0.002802	0.002863	0.002967	0.004111	0.006039	0.009056	0.014889	0.02013	0.039586	0.059499	0.268117	0.571519	0.720431	0.825601	0.851781
5.4	0.002358	0.003064	0.002751	0.003002	0.004118	0.006213	0.00925	0.014919	0.019947	0.04013	0.0598	0.274269	0.579885	0.726919	0.831695	0.857446
5.5	0.002198	0.00303	0.002924	0.003102	0.004276	0.005997	0.00945	0.015029	0.020808	0.04003	0.06108	0.278438	0.582826	0.728764	0.832986	0.857909
5.6	0.002322	0.00311	0.002875	0.002993	0.00424	0.00641	0.009697	0.015897	0.021046	0.041791	0.063904	0.282302	0.589376	0.736059	0.843747	0.871014
5.7	0.002405	0.002985	0.002873	0.003155	0.004237	0.00645	0.009241	0.016081	0.021377	0.042487	0.064121	0.285463	0.594166	0.740355	0.847615	0.872053
5.8	0.00235	0.003219	0.002904	0.002959	0.004237	0.006191	0.009419	0.016083	0.022017	0.043541	0.065561	0.290685	0.596831	0.742179	0.849646	0.875516
5.9	0.002233	0.003333	0.002934	0.003163	0.00411	0.00646	0.009377	0.016652	0.022217	0.044626	0.065726	0.295096	0.604008	0.74542	0.854993	0.882016
6	0.002251	0.003543	0.00288	0.003002	0.004115	0.006542	0.009823	0.016433	0.022129	0.045127	0.067819	0.297856	0.606246	0.752411	0.859641	0.885418
6.1	0.00234	0.003114	0.002983	0.003178	0.004393	0.006536	0.010108	0.016893	0.023335	0.045823	0.068797	0.301167	0.612414	0.75988	0.862169	0.89005
6.2	0.002385	0.003444	0.003265	0.003218	0.004278	0.006884	0.010052	0.017045	0.023038	0.046341	0.070113	0.306303	0.614545	0.759572	0.862751	0.892664
6.3	0.00233	0.003178	0.003	0.00335	0.004549	0.006796	0.010327	0.017381	0.023942	0.046993	0.071746	0.310869	0.620444	0.765962	0.871988	0.900231
6.4	0.002626	0.003364	0.003275	0.003528	0.004647	0.006826	0.010502	0.017701	0.024003	0.047969	0.072247	0.315639	0.626225	0.769429	0.873422	0.902486
6.5	0.002225	0.003237	0.003293	0.003259	0.004629	0.007016	0.010535	0.01797	0.024187	0.047364	0.074076	0.31757	0.630724	0.773623	0.878923	0.907877
6.6	0.002271	0.003376	0.003082	0.003262	0.004667	0.007115	0.011023	0.018268	0.024652	0.049123	0.074495	0.322973	0.63281	0.777245	0.882834	0.909265
6.7	0.002536	0.00335	0.003396	0.003539	0.004553	0.006993	0.010934	0.018389	0.025619	0.048891	0.076316	0.330437	0.638144	0.781805	0.882829	0.910463
6.8	0.002419	0.003541	0.003302	0.003592	0.004591	0.00696	0.01098	0.018372	0.024794	0.049968	0.076701	0.334348	0.642453	0.787062	0.888573	0.913819
6.9	0.002246	0.003767	0.003411	0.003569	0.004685	0.007196	0.01085	0.018784	0.025241	0.0509	0.077447	0.334917	0.642822	0.78912	0.893085	0.92282
7	0.002154	0.003584	0.003097	0.003361	0.004962	0.007374	0.011231	0.019113	0.02567	0.051803	0.07955	0.339111	0.649416	0.791281	0.896428	0.926782
7.1	0.002475	0.00363	0.003216	0.003674	0.004873	0.007458	0.011259	0.019452	0.026587	0.051742	0.080138	0.345264	0.649728	0.79547	0.895932	0.92992
7.2	0.002444	0.003481	0.003298	0.003401	0.005009	0.007431	0.011472	0.019921	0.026018	0.053608	0.080676	0.347235	0.657091	0.798683	0.903683	0.934172
7.3	0.002487	0.003759	0.003478	0.00365	0.005045	0.007543	0.011276	0.019494	0.027121	0.052514	0.08139	0.349289	0.661341	0.802971	0.9049	0.934729
7.4	0.002431	0.003546	0.003435	0.003572	0.005075	0.008063	0.011333	0.020193	0.027136	0.054749	0.08234	0.356035	0.660992	0.802776	0.912341	0.93965
7.5	0.002604	0.003635	0.003322	0.003681	0.004948	0.007629	0.011769	0.020137	0.02771	0.054422	0.083877	0.356035	0.668387	0.807735	0.910026	0.940328
7.6	0.002553	0.00377	0.003501	0.003575	0.005093	0.007948	0.011577	0.020684	0.02801	0.056042	0.085083	0.359927	0.672215	0.807824	0.910951	0.944235
7.7	0.002487	0.003688	0.003628	0.003792	0.00507	0.008096	0.011817	0.020449	0.02847	0.056649	0.085916	0.362092	0.67171	0.811515	0.915074	0.946994
7.8	0.002555	0.003727	0.003462	0.003513	0.005137	0.008152	0.012107	0.020958	0.029682	0.057219	0.086082	0.367734	0.677306	0.811301	0.918621	0.947549
7.9	0.002652	0.003666	0.00334	0.003587	0.005248	0.008251	0.012442	0.021031	0.028861	0.05921	0.086752	0.37051	0.680678	0.816291	0.916392	0.950379
8	0.002414	0.003778	0.003541	0.003869	0.005159	0.008304	0.012323	0.021145	0.029612	0.058811	0.089214	0.37361	0.682568	0.820197	0.922144	0.952208
8.1	0.002573	0.003749	0.003472	0.003668	0.005408	0.007934	0.012631	0.02171	0.029882	0.058996	0.090824	0.376188	0.683527	0.824237	0.92471	0.958765
8.2	0.00253	0.003843	0.00333	0.003681	0.005573	0.008211	0.012616	0.021618	0.030251	0.058873	0.090583	0.378962	0.690308	0.824217	0.92634	0.95794
8.3	0.002538	0.003965	0.003556	0.003729	0.005461	0.008546	0.01242	0.021892	0.03071	0.059667	0.09287	0.379902	0.688197	0.822715	0.925317	0.957597
8.4	0.002405	0.003836	0.003747	0.003948	0.005215	0.00853	0.012857	0.02201	0.030763	0.060846	0.092006	0.383814	0.693202	0.829132	0.930535	0.957849
8.5	0.002553	0.003831	0.003505	0.003467	0.00548	0.008376	0.012738	0.022589	0.030995	0.061268	0.093634	0.387553	0.695221	0.829828	0.929368	0.961392
8.6	0.00237	0.00392	0.003577	0.003872	0.005442	0.008292	0.013629	0.022602	0.031231	0.062931	0.094609	0.390563	0.698244	0.833446	0.932262	0.9661
8.7	0.00236	0.003681	0.003691	0.003829	0.005578	0.008304	0.013599	0.022541	0.031708	0.062429	0.094442	0.390322	0.700678	0.832973	0.936604	0.966638
8.8	0.00253	0.003788	0.003543	0.004022	0.005556	0.008695	0.013106	0.02287	0.031478	0.063064	0.096606	0.395007	0.704575	0.838249	0.935382	0.964877
8.9	0.002352	0.004004	0.003823	0.003747	0.005728	0.00886	0.013675	0.023477	0.031772	0.063991	0.096215	0.398513	0.704719	0.838463	0.936134	0.968815
9	0.002612	0.003988	0.00375	0.00411	0.00564	0.008599	0.013359	0.023236	0.032705	0.064949	0.098103	0.398945	0.705641	0.838048	0.941676	0.975362
9.1	0.002568	0.004057	0.003942	0.003915	0.005456	0.008794	0.013138	0.023091	0.032653	0.064901	0.098085	0.404665	0.709929	0.843533	0.937749	0.976016
9.2	0.002339	0.003925	0.003739	0.00391	0.005649	0.008987	0.013616	0.023498	0.033024	0.066701	0.099423	0.403852	0.711941	0.84288	0.938153	0.973939
9.3	0.002657	0.004234	0.003546	0.004021	0.005724	0.008675	0.013745	0.024153	0.033339	0.065978	0.099433	0.407685	0.713174	0.842646	0.942878	0.972882
9.4	0.002591	0.003925	0.003706	0.004103	0.005662	0.009046	0.013679	0.023811	0.034086	0.067029	0.10155	0.412327	0.717264	0.850526	0.944352	0.97461
9.5	0.002401	0.004032	0.003612	0.004138	0.005693	0.008615	0.014027	0.024626	0.034135	0.067614	0.102517	0.414008	0.718236	0.851517	0.945312	0.975184
9.6	0.00248	0.003917	0.003722	0.004108	0.005805	0.009074	0.014282	0.024045	0.033819	0.068958	0.102599	0.417554	0.720182	0.850938	0.94885	0.977173
9.7	0.002805	0.00396	0.003862	0.004075	0.006082	0.00877	0.014368	0.024466	0.034708	0.06849	0.104979	0.419646	0.722382	0.855351	0.942814	0.977924
9.8	0.002622	0.004308	0.00397	0.003999	0.005904	0.00926	0.013985	0.024636	0.03479	0.069353	0.104456	0.419015	0.723876	0.851904	0.947778	0.980584
9.9	0.00269	0.00398	0.003813	0.004204	0.005932	0.00901	0.013914	0.025342	0.03483	0.069682	0.104604	0.421701	0.727795	0.854851	0.95182	0.97843
10	0.002571	0.004542	0.004065	0.004064	0.00584	0.00917	0.014534	0.025223	0.035039	0.071553	0.106697	0.423621	0.724874	0.8562	0.948686	0.980818
10.1	0.002566	0.004262	0.003841	0.004346	0.006008	0.009595	0.014526	0.0252	0.035042	0.071036	0.106489	0.42609	0.729183	0.854868	0.950702	0.985495
10.2	0.002657	0.003956	0.003874	0.004008	0.005899	0.009569	0.014401	0.025061	0.035512	0.071762	0.108089	0.426337	0.731304	0.860789	0.950962	0.987311
10.3	0.002367	0.004361	0.003922	0.004173	0.006084	0.009396	0.014284	0.025835	0.036378	0.071929	0.107966	0.439232	0.730946	0.860764	0.95312	0.984949
10.4	0.002599	0.004265	0.003956	0.004064	0.006034	0.009643	0.014807	0.025724	0.036039	0.072392	0.109059	0.443349	0.737598	0.860858	0.952862	0.98175
10.5	0.002574	0.004301	0.003963	0.004186	0.006023	0.009544	0.014655	0.02553	0.036142	0.07263	0.109221	0.446098	0.73989	0.861005	0.95344	0.984285
10.6	0.002729	0.004275	0.003963	0.004107	0.006076	0.009765	0.014749	0.025957	0.037139	0.074417	0.111698	0.447901	0.7413	0.862515	0.955475	0.985893
10.7	0.002522	0.004031	0.003871	0.004092	0.006198	0.009857	0.01499	0.025762	0.036461	0.07349	0.111708	0.4489	0.74069	0.863472	0.958778	0.991734
10.8	0.0025	0.004303	0.004103	0.004128	0.006204	0.009899	0.015169	0.026503	0.037058	0.074208	0.111388	0.453015	0.740078	0.865421	0.956461	0.986688
10.9	0.002492	0.004141	0.003739	0.004265	0.006377	0.009681	0.015448	0.027304	0.037676	0.074915	0.113612	0.453909	0.741574	0.868584	0.956458	0.990768
11	0.002873	0.004567	0.003938	0.004699	0.006135	0.010055	0.015537	0.026755	0.037775	0.074774	0.114219	0.456955	0.742605	0.869168	0.9554	0.990527
11.1	0.00256	0.004374	0.004055	0.004298	0.006213	0.010032	0.015453	0.0269	0.037782	0.074856	0.113626	0.460585	0.74525	0.870639	0.959974	0.991023
11.2	0.002769	0.004326	0.004128	0.004573	0.006457	0.010438	0.015573	0.027436	0.037861	0.075874	0.114821	0.460504	0.7473	0.873989	0.958097	0.994043
11.3	0.002695	0.004365	0.004263	0.004158	0.006097	0.009892	0.015542	0.027197	0.038907	0.07589	0.115021	0.460687	0.747508	0.873463	0.962951	0.99102
11.4	0.002873	0.004237	0.004092	0.004182	0.006328	0.009818	0.015687	0.027583	0.038961	0.076652	0.116931	0.463819	0.748807	0.872933	0.959944	0.993543
11.5	0.002482	0.004169	0.004144	0.004448	0.006455	0.010057	0.015484	0.027507	0.039174	0.077848	0.116965	0.466586	0.749995	0.871563	0.960811	0.993443
11.6	0.002659	0.004422	0.004148	0.004397	0.0063	0.01053	0.015832	0.027698	0.038644	0.077953	0.117562	0.467566	0.753689	0.873548	0.963416	0.991744
11.7	0.002624	0.004209	0.004074	0.004573	0.006824	0.010042	0.016192	0.027774	0.039403	0.078641	0.118382	0.468103	0.754682	0.872848	0.963932	0.995486
11.8	0.002729	0.004595	0.004192	0.004435	0.006696	0.010324	0.016256	0.027903	0.039482	0.078796	0.118186	0.467911	0.757698	0.879687	0.964633	0.991317
11.9	0.002558	0.004499	0.004275	0.004639	0.006325	0.010301	0.016199	0.028205	0.039754	0.080219	0.119902	0.47255	0.75485	0.874094	0.964514	0.995168
12	0.002726	0.004572	0.004141	0.004446	0.006528	0.010385	0.015682	0.028797	0.039433	0.079858	0.120074	0.472603	0.753687	0.877114	0.962434	0.994259
12.1	0.002654	0.004436	0.004392	0.004634	0.006625	0.010403	0.015964	0.028533	0.040247	0.079601	0.120965	0.473272	0.758063	0.878729	0.958907	0.993809
12.2	0.002743	0.004377	0.004298	0.004474	0.0068	0.010166	0.016344	0.029051	0.040793	0.080544	0.120692	0.477187	0.759093	0.875241	0.959875	0.994538
12.3	0.002771	0.004537	0.004225	0.004514	0.006874	0.010545	0.016382	0.029019	0.040653	0.081184	0.121463	0.476394	0.757583	0.878344	0.963162	0.999268
12.4	0.002616	0.004486	0.004022	0.004519	0.006445	0.010634	0.016255	0.02915	0.040656	0.082764	0.121839	0.478574	0.757268	0.876276	0.962781	0.996045
12.5	0.002832	0.004303	0.00453	0.004572	0.006849	0.010791	0.016164	0.028864	0.041392	0.083468	0.122134	0.481454	0.756732	0.878923	0.963376	0.997069
12.6	0.002734	0.004385	0.004324	0.004433	0.006663	0.010641	0.016726	0.029173	0.040848	0.082386	0.123236	0.485207	0.765896	0.881555	0.961145	0.994835
12.7	0.002884	0.004486	0.004339	0.004337	0.006813	0.010726	0.016891	0.028978	0.041339	0.08332	0.124914	0.485122	0.763343	0.879613	0.95998	0.99606
12.8	0.002693	0.004717	0.004464	0.004723	0.006801	0.010839	0.01683	0.029678	0.041672	0.0827	0.125671	0.48355	0.763111	0.879474	0.957475	0.993431
12.9	0.002814	0.004835	0.004299	0.004497	0.006768	0.010783	0.01655	0.029396	0.041334	0.082218	0.125688	0.484577	0.766381	0.886252	0.962344	0.997943
13	0.002591	0.004614	0.004224	0.004717	0.006688	0.011053	0.017056	0.030293	0.041685	0.084377	0.124923	0.488082	0.767204	0.883633	0.961171	0.997981
13.1	0.002644	0.004928	0.0041	0.004567	0.006755	0.010713	0.016916	0.030235	0.042302	0.084088	0.126435	0.4917	0.767283	0.887105	0.962631	0.99668
13.2	0.002642	0.004676	0.004161	0.004455	0.006904	0.010926	0.016815	0.029404	0.041705	0.084387	0.127603	0.489817	0.767884	0.883426	0.962263	0.995827
13.3	0.002756	0.004423	0.004196	0.004553	0.006714	0.011048	0.016692	0.029882	0.042024	0.086089	0.128574	0.493917	0.767092	0.881857	0.959359	0.99952
13.4	0.002622	0.004758	0.004275	0.004506	0.007118	0.0112	0.017104	0.029839	0.042028	0.086316	0.128121	0.493322	0.767826	0.883943	0.960351	0.999035
13.5	0.002569	0.004839	0.004623	0.004799	0.006772	0.011122	0.017238	0.030687	0.042833	0.085363	0.128957	0.494014	0.775414	0.885542	0.962667	0.996398
13.6	0.002599	0.004674	0.004484	0.004547	0.006869	0.011063	0.017249	0.030336	0.042146	0.087027	0.12814	0.495245	0.775041	0.886112	0.959523	0.996898
13.7	0.002766	0.004842	0.004298	0.004892	0.006996	0.011413	0.017394	0.030552	0.043269	0.086117	0.130273	0.497936	0.772732	0.887793	0.958976	0.996766
13.8	0.002728	0.004738	0.004346	0.004676	0.006866	0.011013	0.017597	0.030814	0.043321	0.086834	0.130373	0.498553	0.774357	0.884192	0.960064	1
13.9	0.002609	0.004491	0.004247	0.004905	0.006836	0.011427	0.017622	0.031201	0.043505	0.087202	0.131696	0.497581	0.773907	0.880254	0.960483	0.992846
14	0.002777	0.004647	0.0047	0.004732	0.006823	0.01101	0.017688	0.031696	0.043295	0.088586	0.131422	0.499579	0.774786	0.885695	0.958851	0.999024
14.1	0.002843	0.004778	0.004422	0.004868	0.007125	0.011119	0.017694	0.03053	0.043514	0.088282	0.132588	0.499239	0.776502	0.882425	0.961014	0.997459
14.2	0.002698	0.004867	0.004441	0.004774	0.007049	0.011355	0.017523	0.031518	0.044192	0.088368	0.13338	0.504262	0.773237	0.888274	0.959138	0.994833
14.3	0.002692	0.004519	0.004458	0.004989	0.006973	0.011319	0.017475	0.031325	0.043788	0.089359	0.132778	0.502724	0.775551	0.887313	0.957686	0.994582
14.4	0.002606	0.00487	0.00428	0.004672	0.00727	0.011709	0.017963	0.031452	0.044177	0.088399	0.133334	0.50437	0.776722	0.889571	0.962873	0.993065
14.5	0.002822	0.004834	0.004422	0.004854	0.007144	0.011815	0.018102	0.031746	0.044106	0.090131	0.133896	0.505171	0.780131	0.887737	0.95827	0.994973
14.6	0.002701	0.004717	0.004202	0.004583	0.007228	0.011409	0.018051	0.031714	0.044783	0.089585	0.135103	0.504718	0.776417	0.888462	0.959085	0.996853
14.7	0.00264	0.004949	0.004657	0.004926	0.007156	0.011413	0.017978	0.031807	0.044865	0.090171	0.135326	0.507394	0.778709	0.88883	0.956716	0.996512
14.8	0.002553	0.004962	0.004476	0.005202	0.007133	0.011304	0.017947	0.032232	0.044844	0.090985	0.136621	0.509175	0.776732	0.883849	0.957261	0.994607
14.9	0.002759	0.004565	0.004123	0.004916	0.007265	0.011431	0.01775	0.032006	0.044931	0.090713	0.135628	0.508615	0.777525	0.885865	0.959819	0.989201
15	0.00284	0.004657	0.004516	0.004748	0.007322	0.012024	0.018105	0.032156	0.045493	0.089892	0.137006	0.51001	0.778091	0.887951	0.958793	0.99179
15.1	0.002663	0.004976	0.004417	0.005028	0.007387	0.011416	0.017952	0.032371	0.045701	0.090552	0.137889	0.511933	0.778937	0.884382	0.958031	0.99106
15.2	0.002665	0.004672	0.004532	0.005132	0.007382	0.011871	0.017734	0.032169	0.0455	0.091348	0.136997	0.511773	0.779911	0.883769	0.954167	0.990223
15.3	0.002875	0.004814	0.004385	0.004776	0.007311	0.011622	0.01808	0.032123	0.045456	0.092455	0.138418	0.513709	0.775404	0.884168	0.955254	0.992839
15.4	0.002576	0.004816	0.004537	0.00477	0.007891	0.011836	0.01812	0.032846	0.046361	0.09227	0.139099	0.515023	0.780556	0.884252	0.955204	0.992956
15.5	0.002878	0.005117	0.004557	0.004677	0.007499	0.011874	0.017863	0.032212	0.046386	0.09354	0.139038	0.516064	0.78132	0.884966	0.955204	0.986473
15.6	0.00264	0.004816	0.004453	0.004953	0.007258	0.011723	0.018227	0.032964	0.046008	0.09367	0.139182	0.516064	0.780965	0.886892	0.959937	0.991234
15.7	0.002748	0.004883	0.004415	0.00471	0.00743	0.011955	0.018519	0.033359	0.046749	0.092625	0.14027	0.516674	0.780632	0.881508	0.956698	0.985076
15.8	0.002652	0.004999	0.004443	0.005019	0.007166	0.011561	0.018476	0.032842	0.046927	0.093454	0.139132	0.517369	0.778676	0.884158	0.956535	0.990019
15.9	0.002754	0.0047	0.004728	0.005122	0.007578	0.011952	0.018756	0.032976	0.04692	0.092448	0.140178	0.51978	0.78306	0.887656	0.95546	0.988479
16	0.002607	0.004763	0.004676	0.004928	0.007438	0.011881	0.018032	0.033784	0.047431	0.094147	0.140623	0.521427	0.78427	0.886351	0.952061	0.988924
16.1	0.002807	0.004766	0.004591	0.005086	0.007616	0.012133	0.018799	0.033322	0.047431	0.092963	0.141055	0.520883	0.777655	0.881575	0.950548	0.988561
16.2	0.002675	0.005122	0.004621	0.004608	0.007473	0.012288	0.018809	0.033591	0.046564	0.094521	0.141629	0.519318	0.781603	0.880449	0.951399	0.985507
16.3	0.002799	0.005004	0.004778	0.004898	0.007875	0.012235	0.018789	0.03292	0.047398	0.095867	0.142485	0.522447	0.783225	0.883043	0.953317	0.988526
16.4	0.0027	0.004849	0.00453	0.004895	0.007578	0.012468	0.019274	0.033495	0.047466	0.094675	0.142345	0.521594	0.781443	0.88096	0.9482	0.989013
16.5	0.002591	0.005045	0.004746	0.005192	0.007659	0.012146	0.018963	0.033177	0.047651	0.094252	0.143702	0.519856	0.78401	0.884046	0.952348	0.98772
16.6	0.002833	0.004807	0.004605	0.005048	0.007573	0.012315	0.018875	0.033832	0.048398	0.096078	0.142589	0.523634	0.782126	0.88035	0.952278	0.985738
16.7	0.002713	0.005052	0.00472	0.005081	0.00773	0.012544	0.019466	0.034442	0.048841	0.095577	0.143433	0.524571	0.785695	0.881775	0.94869	0.984328
16.8	0.002682	0.004662	0.004519	0.005147	0.007365	0.012227	0.019198	0.034831	0.046818	0.096642	0.143649	0.52492	0.781213	0.882256	0.945718	0.981918
16.9	0.002797	0.004783	0.004436	0.005022	0.007578	0.01215	0.018936	0.034307	0.048135	0.096162	0.144314	0.523047	0.781889	0.877901	0.945884	0.985113
17	0.002782	0.004811	0.004606	0.005033	0.00739	0.012706	0.019426	0.034279	0.048286	0.096396	0.145083	0.527445	0.781239	0.87987	0.946899	0.97989
17.1	0.002797	0.004629	0.004542	0.005109	0.007697	0.012176	0.01919	0.034713	0.048732	0.097101	0.146362	0.529172	0.784186	0.879728	0.944278	0.981699
17.2	0.002724	0.004835	0.004671	0.004994	0.007365	0.012506	0.019116	0.034764	0.04867	0.097684	0.146418	0.528534	0.783352	0.884831	0.945937	0.981252
17.3	0.002629	0.005023	0.004956	0.005165	0.00775	0.0126	0.019551	0.034871	0.048541	0.096319	0.145314	0.529266	0.782507	0.882693	0.943882	0.983432
17.4	0.002736	0.004882	0.004511	0.005116	0.007941	0.012364	0.019594	0.033995	0.049544	0.097739	0.146226	0.530764	0.779235	0.879815	0.942802	0.975567
17.5	0.002861	0.004773	0.004456	0.005391	0.007532	0.012423	0.019325	0.034706	0.048734	0.0986	0.146268	0.530917	0.78178	0.881014	0.938136	0.97985
17.6	0.002761	0.005175	0.004878	0.004964	0.00769	0.012549	0.019085	0.035023	0.049146	0.097607	0.146958	0.533244	0.782618	0.879479	0.942743	0.977548
17.7	0.002716	0.004999	0.004524	0.005271	0.007822	0.013039	0.019507	0.03494	0.04925	0.098506	0.145694	0.532942	0.784006	0.881367	0.944722	0.974911
17.8	0.00267	0.005083	0.004746	0.005154	0.007939	0.012585	0.019621	0.034737	0.049057	0.098568	0.14739	0.530999	0.781742	0.875348	0.945639	0.976934
17.9	0.002659	0.005121	0.004547	0.004895	0.007824	0.012839	0.019558	0.035819	0.049257	0.099066	0.147004	0.529485	0.782905	0.878854	0.942126	0.975334
18	0.002858	0.005037	0.00472	0.005122	0.007796	0.012783	0.019845	0.03541	0.050481	0.100236	0.148538	0.533129	0.782736	0.876532	0.944336	0.977764
18.1	0.002682	0.004915	0.00487	0.005117	0.008028	0.013077	0.019871	0.035773	0.049842	0.098651	0.147926	0.53472	0.781038	0.875968	0.936054	0.974581
18.2	0.002698	0.004929	0.004666	0.005416	0.007905	0.013001	0.019734	0.0353	0.049651	0.099906	0.150461	0.533953	0.782982	0.876694	0.936695	0.974665
18.3	0.002769	0.005174	0.004788	0.005218	0.007778	0.012851	0.019876	0.035562	0.050311	0.101111	0.15025	0.537009	0.783419	0.877426	0.939006	0.974792
18.4	0.002723	0.005073	0.004555	0.004956	0.007911	0.012941	0.019983	0.034769	0.049494	0.099688	0.151699	0.534534	0.782468	0.876383	0.937457	0.975354
18.5	0.002715	0.004877	0.004751	0.005027	0.007764	0.012664	0.020241	0.035285	0.05003	0.100641	0.151605	0.53767	0.780987	0.876873	0.938283	0.972602
18.6	0.002881	0.005292	0.004862	0.005301	0.00771	0.012887	0.020084	0.035503	0.049834	0.10013	0.149484	0.535254	0.780871	0.873187	0.935663	0.973956
18.7	0.002744	0.005139	0.004568	0.005055	0.007605	0.012951	0.01968	0.035851	0.050279	0.101332	0.149872	0.539341	0.784161	0.874287	0.933247	0.974975
18.8	0.002934	0.005144	0.004817	0.004847	0.007738	0.013083	0.020338	0.036131	0.049925	0.101337	0.150791	0.539414	0.781336	0.871962	0.933153	0.972234
18.9	0.002574	0.005089	0.004567	0.005398	0.00789	0.012776	0.019598	0.036299	0.050992	0.102055	0.152113	0.536958	0.77889	0.874538	0.937615	0.977755
19	0.002795	0.004971	0.004671	0.005286	0.007938	0.012783	0.020292	0.036514	0.050819	0.10128	0.153456	0.541551	0.781279	0.871838	0.934398	0.973289
19.1	0.002672	0.005104	0.004572	0.004864	0.008079	0.012989	0.020524	0.035245	0.050947	0.10104	0.150979	0.54026	0.779169	0.872947	0.935974	0.976019
19.2	0.002889	0.005414	0.004794	0.00535	0.007807	0.012552	0.020627	0.036164	0.049798	0.101669	0.153091	0.538714	0.780205	0.873428	0.932181	0.97353
19.3	0.002756	0.005187	0.004801	0.005304	0.008035	0.012394	0.01999	0.036095	0.051134	0.102871	0.152935	0.541541	0.782012	0.873987	0.932125	0.974851
19.4	0.00284	0.005147	0.004643	0.005299	0.008093	0.013093	0.020371	0.03607	0.051132	0.10247	0.154168	0.540637	0.779483	0.87405	0.92996	0.973608
19.5	0.002736	0.005253	0.004859	0.005322	0.007867	0.013095	0.020416	0.036972	0.051599	0.102772	0.154035	0.538958	0.779421	0.871302	0.9288	0.969554
19.6	0.002589	0.005225	0.005	0.00516	0.008231	0.013504	0.020351	0.036223	0.051564	0.103422	0.154155	0.540794	0.779606	0.870344	0.930732	0.969895
19.7	0.002772	0.005187	0.004796	0.005362	0.0082	0.013242	0.020958	0.035978	0.051962	0.10285	0.153624	0.541013	0.78114	0.870893	0.930662	0.965876
19.8	0.002931	0.005164	0.004807	0.005101	0.007999	0.013034	0.020924	0.036337	0.051379	0.104995	0.154834	0.544485	0.777416	0.870969	0.926171	0.968108
19.9	0.002734	0.005088	0.004814	0.005207	0.007961	0.013322	0.021034	0.036827	0.052186	0.103532	0.155451	0.542611	0.782171	0.869716	0.923754	0.966412
20	0.002899	0.005094	0.004897	0.005287	0.008058	0.013364	0.020594	0.036888	0.052735	0.103503	0.153324	0.542288	0.780784	0.863543	0.922568	0.968065
20.1	0.002767	0.005248	0.005027	0.005612	0.008302	0.013387	0.020764	0.036395	0.052188	0.103654	0.155385	0.541919	0.780622	0.866304	0.923965	0.967065
20.2	0.002591	0.005022	0.004943	0.005256	0.007928	0.013306	0.020615	0.036695	0.052059	0.104501	0.154122	0.545438	0.778632	0.869752	0.923828	0.965736
20.3	0.002723	0.004974	0.004953	0.005465	0.008238	0.013421	0.020846	0.037577	0.052011	0.104416	0.15685	0.544432	0.780142	0.86677	0.923449	0.962769
20.4	0.002774	0.005329	0.004824	0.005291	0.007954	0.013286	0.020256	0.03752	0.05245	0.105393	0.156611	0.54307	0.778246	0.86856	0.921194	0.966508
20.5	0.002626	0.005005	0.004735	0.005395	0.008193	0.013105	0.020348	0.037201	0.052875	0.105546	0.15552	0.546716	0.777055	0.86741	0.921438	0.963437
20.6	0.002762	0.005428	0.004873	0.005279	0.008427	0.013552	0.021187	0.037112	0.052316	0.106565	0.158614	0.542727	0.779351	0.862406	0.92002	0.961489
20.7	0.002609	0.005076	0.005096	0.005307	0.008038	0.013024	0.021308	0.038199	0.052545	0.105094	0.157579	0.546715	0.781564	0.867034	0.920732	0.963204
20.8	0.002576	0.004962	0.004677	0.005144	0.008508	0.013462	0.02075	0.037686	0.052197	0.105911	0.156188	0.547803	0.776697	0.862106	0.9192	0.959629
20.9	0.002528	0.005121	0.004936	0.005162	0.008431	0.013227	0.021273	0.037429	0.053472	0.104804	0.158388	0.547094	0.780169	0.865989	0.916946	0.963612
21	0.002665	0.005266	0.00475	0.00568	0.008366	0.0135	0.021578	0.037582	0.052846	0.107492	0.15853	0.548138	0.77718	0.865626	0.915798	0.962076
21.1	0.002591	0.005205	0.005058	0.005358	0.007974	0.013718	0.021055	0.037998	0.05295	0.106546	0.157399	0.547153	0.777687	0.863162	0.917371	0.957503
21.2	0.002682	0.005132	0.0049	0.005408	0.008388	0.013872	0.021372	0.03751	0.053504	0.106379	0.15978	0.545788	0.775975	0.863465	0.914175	0.954502
21.3	0.002729	0.005225	0.004897	0.005548	0.008347	0.01366	0.020872	0.038051	0.052282	0.107347	0.157562	0.545966	0.77592	0.861039	0.912234	0.958658
21.4	0.002741	0.005215	0.0049	0.00551	0.008421	0.013484	0.021191	0.0379	0.053139	0.107176	0.159795	0.547209	0.776514	0.863401	0.915684	0.956933
21.5	0.002637	0.005348	0.005032	0.005179	0.008111	0.014073	0.021054	0.038154	0.053848	0.107082	0.158977	0.545336	0.777492	0.863784	0.912786	0.954352
21.6	0.00284	0.005353	0.004888	0.005235	0.008403	0.013299	0.021141	0.038356	0.052799	0.107804	0.160414	0.548994	0.777781	0.860007	0.910067	0.954078
21.7	0.002692	0.005081	0.004677	0.005472	0.008629	0.013667	0.021403	0.037539	0.053687	0.107517	0.160018	0.547965	0.776555	0.862398	0.909948	0.95399
21.8	0.002818	0.005352	0.004908	0.005409	0.008177	0.014051	0.021031	0.037825	0.054007	0.107853	0.160816	0.548497	0.776562	0.857243	0.909107	0.955141
21.9	0.002797	0.00551	0.004893	0.005212	0.008241	0.013492	0.02144	0.03808	0.054188	0.107068	0.161146	0.550392	0.776931	0.85958	0.90676	0.953786
22	0.002774	0.005528	0.004845	0.005611	0.008086	0.013751	0.021392	0.038474	0.054386	0.107184	0.161347	0.544755	0.777187	0.856852	0.909678	0.95328
22.1	0.002795	0.005225	0.004936	0.005444	0.008276	0.01366	0.021252	0.038009	0.053944	0.108318	0.160795	0.546355	0.776209	0.856308	0.908139	0.952537
22.2	0.002556	0.005144	0.004844	0.005512	0.008411	0.013644	0.021824	0.03856	0.053664	0.108012	0.160206	0.548941	0.777292	0.852917	0.9055	0.95524
22.3	0.002761	0.005449	0.004972	0.005518	0.008307	0.013906	0.021022	0.038093	0.054256	0.109008	0.160951	0.552744	0.775759	0.856565	0.90571	0.948871
22.4	0.002759	0.005259	0.004761	0.005477	0.008329	0.013786	0.021469	0.038714	0.054365	0.109417	0.162122	0.550587	0.770755	0.85417	0.903859	0.952053
22.5	0.002764	0.005221	0.00476	0.005846	0.008342	0.013843	0.021888	0.038222	0.054594	0.108546	0.160941	0.549749	0.775933	0.855308	0.903757	0.946186
22.6	0.002799	0.005254	0.004966	0.005632	0.008269	0.014407	0.021768	0.03888	0.055395	0.109547	0.163156	0.550712	0.774779	0.849762	0.902763	0.946249
22.7	0.00287	0.0052	0.004728	0.005616	0.008007	0.013957	0.022282	0.038545	0.055491	0.109785	0.16295	0.552545	0.774223	0.850669	0.900851	0.950502
22.8	0.002551	0.005437	0.004974	0.005688	0.008348	0.013931	0.021362	0.038834	0.05481	0.110088	0.162779	0.552042	0.774337	0.85055	0.905088	0.942388
22.9	0.002766	0.004992	0.004651	0.005747	0.008474	0.013957	0.021845	0.038885	0.055565	0.10947	0.16215	0.549955	0.771411	0.849589	0.900355	0.943762
23	0.002614	0.00534	0.004976	0.005424	0.008314	0.01372	0.02155	0.038893	0.055323	0.109029	0.162591	0.552284	0.77275	0.849912	0.901414	0.940906
23.1	0.002713	0.005019	0.004921	0.005576	0.008644	0.013873	0.021496	0.039157	0.054688	0.11005	0.163704	0.552304	0.770219	0.848527	0.898961	0.942893
23.2	0.002711	0.005276	0.005023	0.005652	0.008564	0.013817	0.021718	0.038394	0.054953	0.110215	0.163689	0.553605	0.770986	0.846741	0.895711	0.937065
23.3	0.002728	0.005277	0.005038	0.005739	0.008423	0.01399	0.021384	0.039259	0.055395	0.110256	0.16456	0.554156	0.775736	0.851091	0.894302	0.941207
23.4	0.002863	0.005035	0.005083	0.005456	0.008579	0.014031	0.022088	0.039058	0.055572	0.110601	0.165399	0.550872	0.769647	0.84614	0.895226	0.939878
23.5	0.002789	0.005424	0.004753	0.005528	0.008642	0.013664	0.021784	0.039231	0.055577	0.109994	0.164642	0.55122	0.773034	0.844638	0.895186	0.939748
23.6	0.002762	0.005386	0.004966	0.005555	0.008503	0.013773	0.021887	0.039114	0.055977	0.110172	0.166799	0.551516	0.773166	0.848949	0.888289	0.937958
23.7	0.002784	0.005129	0.004728	0.005355	0.008403	0.014563	0.021878	0.039525	0.056258	0.112245	0.165427	0.554611	0.768446	0.843218	0.892524	0.93785
23.8	0.002665	0.005495	0.005106	0.005467	0.008592	0.014322	0.022035	0.039713	0.056512	0.111173	0.165426	0.553071	0.769798	0.845848	0.890082	0.935288
23.9	0.002766	0.005281	0.004969	0.005624	0.008658	0.013743	0.022132	0.039937	0.055166	0.112329	0.164532	0.555818	0.770722	0.843779	0.889643	0.939372
24	0.00271	0.005385	0.004939	0.0055	0.008693	0.014172	0.022106	0.039982	0.056583	0.11105	0.165861	0.551643	0.771926	0.844112	0.887389	0.936575
24.1	0.002706	0.005602	0.004944	0.005617	0.008784	0.013883	0.021789	0.039909	0.055343	0.111929	0.164177	0.554948	0.76788	0.845942	0.892869	0.935122
24.2	0.002827	0.005409	0.005131	0.005494	0.008383	0.014294	0.021893	0.039921	0.055921	0.111518	0.165551	0.553361	0.767653	0.843592	0.887674	0.932589
24.3	0.002673	0.005342	0.005198	0.005335	0.00852	0.014361	0.022254	0.039566	0.056698	0.112239	0.165889	0.555584	0.768108	0.84329	0.889386	0.931197
24.4	0.002889	0.005225	0.004956	0.00549	0.008587	0.013726	0.022322	0.039965	0.05688	0.111135	0.165596	0.552743	0.767994	0.839225	0.885794	0.930598
24.5	0.002749	0.005459	0.005129	0.005625	0.008594	0.013989	0.022607	0.039594	0.056043	0.113124	0.16907	0.551304	0.767448	0.837799	0.886526	0.929674
24.6	0.002724	0.005347	0.005019	0.005621	0.00893	0.014092	0.021925	0.039677	0.055395	0.112857	0.168218	0.55396	0.765952	0.842108	0.885741	0.928647
24.7	0.00279	0.005647	0.004854	0.005686	0.008558	0.014281	0.021999	0.03995	0.057483	0.112032	0.166082	0.553254	0.767814	0.838508	0.882956	0.927699
24.8	0.002701	0.005507	0.005091	0.005428	0.009036	0.014063	0.022418	0.040772	0.057129	0.113009	0.167652	0.554349	0.766111	0.838457	0.882578	0.925175
24.9	0.002786	0.005566	0.004972	0.005738	0.008492	0.014188	0.022045	0.03985	0.057204	0.113276	0.166564	0.555211	0.76385	0.837429	0.879463	0.926966
25	0.00239	0.005187	0.005167	0.005936	0.008647	0.014333	0.022866	0.039952	0.056946	0.113426	0.169014	0.557959	0.765802	0.835506	0.881318	0.927512
25.1	0.002685	0.005487	0.005052	0.005855	0.008683	0.013819	0.022249	0.040483	0.057656	0.114097	0.168833	0.552719	0.768298	0.833796	0.880591	0.925748
25.2	0.002713	0.005464	0.005169	0.005627	0.008756	0.014127	0.023173	0.041224	0.056906	0.112466	0.16859	0.554032	0.765962	0.834752	0.879715	0.921973
25.3	0.002814	0.005475	0.005109	0.005452	0.008698	0.014185	0.022165	0.041217	0.057181	0.112773	0.168254	0.553861	0.765374	0.834886	0.878806	0.922829
25.4	0.002391	0.005465	0.005187	0.005675	0.008667	0.014876	0.022634	0.0408	0.056944	0.113944	0.16925	0.558711	0.764234	0.831942	0.877502	0.923249
25.5	0.002774	0.005205	0.005109	0.005621	0.008695	0.014224	0.022441	0.040953	0.056741	0.113985	0.168998	0.553064	0.766272	0.830887	0.875368	0.921791
25.6	0.002659	0.005446	0.005056	0.005747	0.008517	0.014805	0.022434	0.041059	0.057155	0.113162	0.170053	0.554608	0.762705	0.827875	0.876489	0.923188
25.7	0.00286	0.00505	0.00504	0.005609	0.008878	0.014826	0.022662	0.040457	0.05697	0.115707	0.171312	0.5528	0.759888	0.828555	0.875838	0.918268
25.8	0.002678	0.005269	0.005197	0.005683	0.008807	0.01453	0.022398	0.040457	0.05657	0.115286	0.170088	0.553394	0.76464	0.830404	0.875	0.916608
25.9	0.002718	0.005213	0.004923	0.005881	0.008452	0.014264	0.022487	0.040401	0.057122	0.114543	0.170922	0.555096	0.767171	0.827285	0.877289	0.918999
26	0.002729	0.005437	0.005223	0.005569	0.008919	0.014477	0.022441	0.040998	0.057363	0.114831	0.169926	0.555627	0.76411	0.829266	0.875501	0.915923
26.1	0.002693	0.005611	0.005119	0.00552	0.008945	0.014612	0.022533	0.041285	0.056886	0.114706	0.171297	0.556209	0.763614	0.824968	0.869607	0.917132
26.2	0.002878	0.005632	0.005015	0.005805	0.008493	0.014744	0.022701	0.041671	0.058275	0.115506	0.169694	0.556602	0.76287	0.82503	0.870517	0.917168
26.3	0.002736	0.005624	0.005068	0.005586	0.008508	0.014175	0.022449	0.040651	0.057594	0.114193	0.170472	0.558081	0.759821	0.825105	0.871329	0.9156
26.4	0.00272	0.00569	0.005334	0.005675	0.00913	0.014591	0.02255	0.040881	0.057632	0.114805	0.17151	0.556122	0.75831	0.823998	0.87133	0.918841
26.5	0.002533	0.005233	0.005149	0.005675	0.00848	0.014775	0.02238	0.042404	0.058572	0.116842	0.171361	0.554194	0.760904	0.826816	0.868114	0.912328
26.6	0.002777	0.005653	0.004943	0.005715	0.008632	0.014518	0.023651	0.041737	0.057425	0.115751	0.171996	0.556719	0.76036	0.8241	0.866991	0.909508
26.7	0.002781	0.005243	0.005162	0.005724	0.008685	0.015186	0.02248	0.041107	0.058273	0.116053	0.172718	0.554224	0.759562	0.822646	0.870633	0.911132
26.8	0.002452	0.005485	0.005325	0.005586	0.008624	0.014617	0.022977	0.041283	0.058121	0.114584	0.171808	0.5553	0.758254	0.819591	0.864968	0.908718
26.9	0.002756	0.005411	0.00491	0.005553	0.008899	0.014371	0.02311	0.041964	0.058268	0.11665	0.172949	0.55439	0.758844	0.822059	0.86365	0.907857
27	0.002504	0.005182	0.005198	0.005787	0.008963	0.01482	0.022409	0.04128	0.057651	0.116711	0.173172	0.555338	0.755012	0.819877	0.864616	0.911218
27.1	0.002649	0.005019	0.005289	0.005531	0.008775	0.015011	0.023191	0.041288	0.058558	0.116954	0.173037	0.555157	0.758589	0.820271	0.863322	0.903295
27.2	0.002705	0.005307	0.005236	0.005678	0.009303	0.015102	0.02346	0.041222	0.059065	0.117015	0.171981	0.557156	0.755463	0.816344	0.863993	0.906369
27.3	0.002622	0.005497	0.005052	0.005787	0.009018	0.014368	0.023003	0.041413	0.059241	0.117488	0.174092	0.557413	0.757881	0.815566	0.861544	0.905532
27.4	0.002494	0.005805	0.005299	0.005782	0.008843	0.01496	0.022851	0.041661	0.05886	0.116469	0.172588	0.557258	0.750618	0.817934	0.861659	0.906519
27.5	0.002668	0.005632	0.005205	0.005863	0.008863	0.014856	0.022941	0.041603	0.058667	0.117439	0.173652	0.555474	0.756613	0.818094	0.860685	0.903815
27.6	0.002614	0.005348	0.004844	0.005718	0.009264	0.014587	0.023363	0.042584	0.058969	0.117595	0.173368	0.555244	0.753747	0.815061	0.85738	0.903175
27.7	0.002705	0.00538	0.004999	0.005741	0.008672	0.014525	0.022957	0.041733	0.058247	0.117114	0.173212	0.555584	0.755767	0.815739	0.8575	0.901321
27.8	0.00265	0.005553	0.005231	0.005705	0.009122	0.015	0.02314	0.042126	0.0592	0.118266	0.176207	0.555785	0.750202	0.812856	0.861974	0.902113
27.9	0.002652	0.005517	0.005129	0.005531	0.009168	0.014762	0.023434	0.042472	0.058781	0.117092	0.17387	0.552863	0.752388	0.811342	0.855524	0.89879
28	0.002662	0.005365	0.005038	0.005789	0.009029	0.015108	0.023244	0.04232	0.058445	0.118659	0.17475	0.554073	0.7501	0.812894	0.856479	0.898183
28.1	0.002807	0.005644	0.005324	0.005716	0.009094	0.014983	0.023513	0.041479	0.059914	0.118189	0.17568	0.556572	0.748507	0.810219	0.85747	0.896181
28.2	0.00283	0.005487	0.005268	0.005876	0.008957	0.014604	0.023369	0.041427	0.059149	0.118906	0.176185	0.552846	0.74906	0.808535	0.853486	0.89815
28.3	0.002644	0.005409	0.005182	0.006039	0.009092	0.014919	0.02319	0.042146	0.058847	0.118027	0.17497	0.554821	0.751622	0.811708	0.854929	0.897058
28.4	0.002606	0.005304	0.005089	0.005785	0.00927	0.014716	0.023589	0.042662	0.058796	0.118039	0.174302	0.555538	0.749686	0.808134	0.855572	0.893977
28.5	0.002832	0.00552	0.005121	0.00567	0.008863	0.01508	0.023256	0.042848	0.059672	0.118159	0.176266	0.553295	0.750648	0.811375	0.853341	0.894206
28.6	0.002604	0.005762	0.005116	0.005937	0.009269	0.015245	0.023521	0.042236	0.059634	0.118685	0.175793	0.556376	0.748634	0.808563	0.854363	0.893466
28.7	0.002624	0.005464	0.005174	0.006011	0.009053	0.015291	0.023665	0.041944	0.059536	0.119373	0.175087	0.558005	0.753224	0.807036	0.854503	0.899095
28.8	0.002629	0.005617	0.00501	0.005833	0.00914	0.014978	0.023937	0.042713	0.058925	0.118273	0.175303	0.556819	0.74807	0.804526	0.84857	0.890285
28.9	0.002639	0.005548	0.005207	0.005853	0.008784	0.014853	0.023551	0.042281	0.059576	0.119032	0.175296	0.553521	0.743926	0.807107	0.848497	0.888654
29	0.00282	0.005668	0.005081	0.00596	0.009133	0.015582	0.023368	0.042777	0.060406	0.118151	0.176911	0.554837	0.748124	0.806135	0.849322	0.891363
29.1	0.002512	0.005355	0.005157	0.005703	0.009029	0.014914	0.023318	0.043036	0.059677	0.119393	0.175784	0.555124	0.74522	0.801862	0.847847	0.886625
29.2	0.002792	0.005581	0.005335	0.005447	0.009274	0.015199	0.023721	0.042642	0.05997	0.119545	0.177241	0.555924	0.745169	0.80223	0.847776	0.888291
29.3	0.002523	0.005449	0.005111	0.005731	0.009064	0.015298	0.023259	0.042089	0.060381	0.119487	0.176627	0.555647	0.745261	0.804616	0.846064	0.888708
29.4	0.002581	0.005454	0.005109	0.006039	0.009104	0.015141	0.024222	0.042167	0.059746	0.120186	0.177158	0.553885	0.745799	0.803576	0.84586	0.887504
29.5	0.002812	0.005515	0.005136	0.005893	0.009242	0.015486	0.024001	0.042995	0.05986	0.11971	0.177163	0.553834	0.746464	0.800851	0.845753	0.889735
29.6	0.002683	0.005301	0.004944	0.005833	0.009028	0.015247	0.024012	0.042101	0.059624	0.120973	0.177946	0.557918	0.744943	0.799103	0.842461	0.888482
29.7	0.00263	0.005625	0.005014	0.005784	0.008853	0.014769	0.023081	0.042081	0.059677	0.121133	0.177199	0.555914	0.745283	0.797203	0.841841	0.883831
29.8	0.002772	0.005807	0.005083	0.005937	0.009198	0.015211	0.024201	0.043533	0.060214	0.120659	0.178532	0.557628	0.745456	0.795836	0.83638	0.882057
29.9	0.002729	0.005668	0.005014	0.005616	0.009288	0.015315	0.024014	0.043275	0.059753	0.119381	0.177425	0.55739	0.74242	0.797898	0.838643	0.88332
30	0.002663	0.00571	0.005223	0.006117	0.009092	0.015414	0.02409	0.043239	0.059677	0.12027	0.177282	0.556593	0.740878	0.797154	0.843927	0.88376
30.1	0.002609	0.005584	0.005314	0.005719	0.009118	0.014556	0.023951	0.043594	0.060856	0.122302	0.17726	0.55584	0.744006	0.796079	0.839929	0.880592
30.2	0.002601	0.005802	0.005287	0.006072	0.009556	0.015131	0.023488	0.042916	0.060549	0.120668	0.177778	0.556532	0.742563	0.791916	0.841541	0.878399
30.3	0.002861	0.005604	0.005183	0.00579	0.009132	0.01539	0.024154	0.043514	0.061184	0.120668	0.177208	0.556935	0.738829	0.789147	0.836892	0.882418
30.4	0.002541	0.005728	0.005294	0.005799	0.009532	0.015593	0.023717	0.043445	0.061243	0.121214	0.177194	0.554276	0.740266	0.794617	0.834505	0.87895

## Sheet: primary data n=3
time	0	0.000251	0.000753	0.002258	0.006774	0.020322	0.060966	0.182899	0.548697	1.646091	4.938272	14.81481	44.44444	133.3333	400	1200
0	0.000906	0.000962	0.00121	0.002119	0.002492	0.002966	0.003162	0.003166	0.000877	0.000895	0.001279	0.003249	0.006825	0.011199	0.015494	0.020119
0.1	0.001042	0.00113	0.001256	0.002158	0.002552	0.003178	0.003187	0.003219	0.000877	0.000969	0.001341	0.004473	0.011164	0.019781	0.030135	0.035501
0.2	0.000943	0.001148	0.001196	0.00228	0.002683	0.003001	0.003198	0.003771	0.000907	0.000907	0.001397	0.005501	0.01783	0.031458	0.048688	0.055671
0.3	0.000939	0.001247	0.001307	0.002296	0.002688	0.003396	0.003311	0.003498	0.001022	0.000936	0.00167	0.00798	0.025101	0.045078	0.071007	0.076727
0.4	0.00107	0.001171	0.001201	0.002305	0.002936	0.003288	0.003256	0.003422	0.000934	0.001151	0.001705	0.009965	0.033555	0.059976	0.093475	0.100083
0.5	0.001038	0.001178	0.001318	0.002441	0.002437	0.00326	0.003465	0.003477	0.001197	0.001187	0.00205	0.012114	0.043051	0.076784	0.11818	0.126585
0.6	0.000973	0.001364	0.001252	0.002444	0.002566	0.003532	0.003408	0.003339	0.001144	0.001309	0.002248	0.015004	0.053756	0.092589	0.1418	0.149924
0.7	0.000994	0.001044	0.001348	0.002464	0.002848	0.00346	0.003675	0.00381	0.001268	0.001528	0.002745	0.017482	0.065041	0.110727	0.166817	0.176376
0.8	0.001035	0.001316	0.001512	0.00229	0.002772	0.00332	0.003872	0.003659	0.001281	0.00145	0.002733	0.020621	0.075756	0.130364	0.192645	0.202279
0.9	0.001084	0.001289	0.001463	0.002441	0.002927	0.0035	0.003514	0.003617	0.001339	0.001689	0.002977	0.023523	0.087325	0.146532	0.218186	0.227958
1	0.000957	0.001321	0.001268	0.002282	0.002971	0.003465	0.003873	0.003884	0.001341	0.00185	0.003338	0.02736	0.098885	0.164266	0.241949	0.253404
1.1	0.001143	0.001245	0.001395	0.002441	0.002883	0.003415	0.003735	0.003666	0.001381	0.001825	0.00362	0.030418	0.111247	0.180446	0.26451	0.277113
1.2	0.001146	0.001433	0.00141	0.002342	0.00283	0.003513	0.003709	0.003675	0.001472	0.002078	0.004089	0.033962	0.122057	0.200234	0.287934	0.302605
1.3	0.001003	0.001436	0.001362	0.002489	0.002844	0.003589	0.003656	0.004084	0.001537	0.002232	0.00453	0.037321	0.134616	0.216759	0.30783	0.323338
1.4	0.001104	0.001434	0.001445	0.002512	0.003233	0.00375	0.004073	0.003948	0.001565	0.002336	0.004882	0.041426	0.146438	0.229953	0.331064	0.347864
1.5	0.001077	0.001392	0.001436	0.002435	0.002902	0.003891	0.004096	0.004186	0.001572	0.002414	0.005283	0.045158	0.156175	0.248682	0.349274	0.366331
1.6	0.001111	0.001371	0.001502	0.0026	0.002978	0.003935	0.003902	0.004277	0.001788	0.002621	0.005674	0.048458	0.169008	0.261178	0.372987	0.389398
1.7	0.001201	0.001422	0.001429	0.002432	0.003219	0.003826	0.004034	0.004225	0.001691	0.002825	0.005888	0.052634	0.181178	0.280458	0.390481	0.405585
1.8	0.00113	0.001542	0.001371	0.002444	0.003069	0.004139	0.004317	0.004238	0.00197	0.003076	0.006461	0.055924	0.192871	0.294793	0.406558	0.424614
1.9	0.001196	0.001434	0.00148	0.002644	0.003053	0.003946	0.0044	0.004176	0.002122	0.003106	0.006894	0.059521	0.202236	0.31022	0.42584	0.447554
2	0.001105	0.001526	0.001663	0.002648	0.003288	0.004066	0.004346	0.004369	0.0022	0.003454	0.007301	0.063199	0.213947	0.320722	0.440994	0.46205
2.1	0.001144	0.001509	0.001556	0.002642	0.00329	0.004446	0.004139	0.004712	0.002094	0.003633	0.007482	0.067512	0.226618	0.3373	0.45742	0.477742
2.2	0.001233	0.001615	0.00159	0.002802	0.003603	0.00396	0.004362	0.004492	0.002425	0.004047	0.008108	0.070799	0.235829	0.348294	0.471932	0.494332
2.3	0.001208	0.001411	0.001523	0.002708	0.003346	0.004054	0.004317	0.004457	0.002372	0.003746	0.00829	0.074644	0.247134	0.360519	0.486343	0.513577
2.4	0.001374	0.001523	0.001693	0.002611	0.003242	0.004015	0.00462	0.004701	0.00243	0.00419	0.008812	0.078735	0.257357	0.373851	0.504145	0.527394
2.5	0.001243	0.001564	0.001518	0.002837	0.003461	0.004234	0.004346	0.004662	0.00257	0.004392	0.00953	0.083337	0.268468	0.383496	0.515495	0.539193
2.6	0.001307	0.001482	0.001564	0.00271	0.003468	0.004473	0.004634	0.004798	0.002667	0.004427	0.009625	0.087536	0.27622	0.395803	0.52726	0.552051
2.7	0.001242	0.001548	0.001652	0.002743	0.003543	0.00433	0.004627	0.004859	0.002658	0.004984	0.010382	0.091275	0.285817	0.40572	0.540826	0.569733
2.8	0.001309	0.001562	0.001647	0.002711	0.003238	0.004591	0.004892	0.004949	0.002867	0.004659	0.010906	0.095205	0.297556	0.415651	0.553118	0.579146
2.9	0.001208	0.001625	0.001689	0.002918	0.003631	0.004411	0.00479	0.004942	0.002871	0.005143	0.011466	0.099686	0.305764	0.426118	0.566029	0.589325
3	0.001178	0.001645	0.001684	0.002672	0.003371	0.004496	0.004798	0.005269	0.002899	0.005405	0.011449	0.104904	0.316092	0.437046	0.576698	0.602959
3.1	0.001268	0.001804	0.001717	0.003001	0.003624	0.004523	0.005066	0.005165	0.002869	0.005407	0.011946	0.105817	0.325283	0.445943	0.590317	0.615526
3.2	0.001457	0.001578	0.001671	0.002757	0.003672	0.004602	0.004802	0.005306	0.003162	0.005858	0.012552	0.111059	0.332701	0.456332	0.596039	0.627167
3.3	0.001281	0.001678	0.001682	0.002809	0.003571	0.004535	0.004929	0.005117	0.003346	0.006056	0.012911	0.114099	0.342249	0.466033	0.608778	0.638147
3.4	0.001296	0.001852	0.001631	0.002964	0.003691	0.004381	0.005025	0.005166	0.003187	0.006074	0.013875	0.117087	0.350758	0.475441	0.615834	0.646784
3.5	0.001388	0.001749	0.001753	0.002957	0.003587	0.004906	0.004968	0.005269	0.003249	0.00647	0.013612	0.12139	0.355846	0.48215	0.628492	0.657185
3.6	0.001367	0.001749	0.001783	0.002989	0.003801	0.004699	0.00509	0.00567	0.00333	0.006571	0.014126	0.126468	0.364147	0.491032	0.635234	0.670978
3.7	0.001376	0.001852	0.001661	0.002971	0.003838	0.004903	0.005149	0.005336	0.003408	0.006549	0.015161	0.128313	0.371338	0.50073	0.643448	0.677879
3.8	0.001327	0.001816	0.001818	0.002779	0.003801	0.00453	0.005131	0.005522	0.003672	0.006645	0.015366	0.131126	0.377663	0.503901	0.654573	0.685689
3.9	0.001307	0.001954	0.001756	0.002886	0.003857	0.004752	0.005301	0.005458	0.003375	0.006997	0.015428	0.135263	0.387799	0.51235	0.657937	0.696993
4	0.001378	0.001809	0.001804	0.003191	0.003753	0.004862	0.005517	0.005909	0.003564	0.007268	0.016111	0.139835	0.39552	0.522753	0.669414	0.705191
4.1	0.001457	0.001961	0.00191	0.002982	0.003773	0.004887	0.005423	0.00586	0.003658	0.007222	0.016601	0.145065	0.404627	0.528257	0.678661	0.712713
4.2	0.001259	0.001905	0.001831	0.003191	0.00382	0.005016	0.005193	0.005649	0.003944	0.007621	0.016723	0.147237	0.409664	0.537249	0.682228	0.719468
4.3	0.001459	0.00197	0.001732	0.002989	0.003783	0.00482	0.00578	0.005913	0.003686	0.007979	0.017636	0.148797	0.418983	0.542078	0.691533	0.729646
4.4	0.001418	0.001988	0.001845	0.002906	0.0041	0.004894	0.00541	0.00592	0.004079	0.007961	0.017929	0.153702	0.424089	0.551517	0.700951	0.739277
4.5	0.001528	0.001967	0.001719	0.003207	0.003934	0.005002	0.005437	0.005766	0.0043	0.008299	0.018338	0.159061	0.428965	0.55582	0.710083	0.743357
4.6	0.001395	0.001969	0.001829	0.003362	0.004013	0.00518	0.005538	0.005838	0.004232	0.008564	0.019206	0.160609	0.435653	0.562927	0.716081	0.752057
4.7	0.001337	0.00203	0.00196	0.003292	0.003585	0.005249	0.005568	0.006268	0.004475	0.008451	0.018693	0.164777	0.445096	0.569984	0.719715	0.757111
4.8	0.001546	0.001896	0.001983	0.003024	0.004119	0.005048	0.005665	0.005964	0.004342	0.008589	0.019783	0.167818	0.449401	0.57589	0.726143	0.766384
4.9	0.001422	0.001988	0.00193	0.003155	0.004241	0.005034	0.005608	0.006123	0.004599	0.009192	0.020266	0.170687	0.456095	0.581995	0.735985	0.771536
5	0.001617	0.002034	0.001831	0.003109	0.004243	0.005212	0.005601	0.006358	0.004841	0.00927	0.020872	0.173356	0.459788	0.588753	0.740658	0.781448
5.1	0.001592	0.002068	0.001956	0.003221	0.004052	0.005322	0.005494	0.006323	0.004802	0.009155	0.021576	0.177139	0.467096	0.59497	0.746046	0.785305
5.2	0.001666	0.001921	0.002018	0.003139	0.004082	0.005142	0.005907	0.006118	0.004583	0.009774	0.021879	0.180002	0.473605	0.599539	0.75153	0.794693
5.3	0.001592	0.002158	0.001949	0.00315	0.004349	0.005635	0.00601	0.006511	0.004936	0.010096	0.021765	0.183918	0.477585	0.60817	0.757956	0.799718
5.4	0.001617	0.002089	0.00205	0.003177	0.004158	0.005202	0.005851	0.006714	0.00489	0.010313	0.022742	0.189051	0.48381	0.611506	0.761785	0.803595
5.5	0.001622	0.002105	0.002154	0.003198	0.004056	0.005488	0.006022	0.006157	0.004929	0.010301	0.022917	0.19013	0.489437	0.611621	0.770742	0.810245
5.6	0.001576	0.002119	0.0019	0.003231	0.004064	0.005455	0.006067	0.006567	0.005283	0.010739	0.023076	0.193918	0.492946	0.620586	0.772426	0.816917
5.7	0.001564	0.002015	0.001903	0.003435	0.004197	0.0057	0.005777	0.006723	0.005239	0.010695	0.023633	0.196872	0.498075	0.627756	0.776566	0.822858
5.8	0.001413	0.002018	0.002085	0.003564	0.004397	0.005517	0.005784	0.006809	0.00531	0.010693	0.024365	0.198283	0.502601	0.627546	0.784562	0.829727
5.9	0.00144	0.002273	0.002075	0.003504	0.004114	0.005264	0.006509	0.006946	0.005071	0.011222	0.024279	0.20259	0.513931	0.634789	0.790095	0.831064
6	0.001457	0.002221	0.002138	0.003424	0.004259	0.005782	0.006075	0.006495	0.005554	0.011192	0.024726	0.204166	0.522819	0.64186	0.79625	0.836864
6.1	0.001486	0.002259	0.002039	0.003587	0.004485	0.00578	0.006097	0.006838	0.005352	0.011348	0.025248	0.20889	0.526338	0.645302	0.796195	0.84462
6.2	0.001717	0.002236	0.002315	0.003242	0.004165	0.005628	0.006297	0.006907	0.00564	0.011659	0.02629	0.214387	0.530703	0.6481	0.803714	0.847441
6.3	0.001533	0.002269	0.00205	0.003559	0.004459	0.005715	0.006291	0.00702	0.005642	0.011985	0.025934	0.214423	0.535157	0.649325	0.810985	0.851148
6.4	0.001493	0.002336	0.002152	0.003421	0.004332	0.005752	0.005998	0.006977	0.005722	0.011728	0.026925	0.217624	0.539368	0.658167	0.812423	0.855317
6.5	0.001537	0.002312	0.001933	0.003426	0.004455	0.005485	0.006452	0.007312	0.005771	0.012114	0.027008	0.218351	0.541846	0.658749	0.815947	0.856158
6.6	0.001678	0.002145	0.00202	0.003426	0.004618	0.005596	0.006127	0.006887	0.005868	0.012409	0.027434	0.221642	0.548965	0.668395	0.822844	0.867887
6.7	0.001624	0.002156	0.002015	0.003332	0.004482	0.00595	0.006434	0.006935	0.006019	0.012768	0.027558	0.226543	0.550983	0.668089	0.824165	0.868598
6.8	0.001519	0.002407	0.002032	0.003392	0.00462	0.005934	0.006579	0.006801	0.005585	0.012986	0.02855	0.228924	0.556213	0.673392	0.825866	0.87367
6.9	0.001627	0.002298	0.002165	0.003449	0.004367	0.005478	0.006302	0.007296	0.005983	0.012841	0.028566	0.230739	0.559483	0.674368	0.826807	0.879822
7	0.00185	0.002384	0.002198	0.003412	0.004609	0.0059	0.006286	0.007519	0.006045	0.013286	0.028773	0.234522	0.566035	0.681498	0.83367	0.880768
7.1	0.001516	0.002423	0.00205	0.003576	0.004811	0.005828	0.006585	0.00713	0.006217	0.013258	0.028987	0.23622	0.565014	0.685233	0.834876	0.886484
7.2	0.001721	0.002294	0.001988	0.003311	0.00439	0.00595	0.006712	0.007517	0.006024	0.013555	0.029841	0.238501	0.574599	0.687785	0.840927	0.889464
7.3	0.001673	0.002352	0.002243	0.003465	0.004409	0.005966	0.00659	0.0074	0.006625	0.013907	0.030508	0.24252	0.575619	0.690509	0.844793	0.89153
7.4	0.001648	0.002246	0.002089	0.003498	0.004602	0.005782	0.006664	0.007784	0.006512	0.014287	0.030632	0.241858	0.576224	0.698999	0.849149	0.896826
7.5	0.001608	0.002351	0.002135	0.003454	0.004859	0.006199	0.006825	0.007579	0.006327	0.013737	0.029915	0.24795	0.584098	0.702034	0.851134	0.900317
7.6	0.001689	0.002273	0.002273	0.003249	0.004376	0.005845	0.006756	0.00766	0.006473	0.01422	0.031327	0.251687	0.586364	0.702883	0.857531	0.902779
7.7	0.001716	0.002458	0.002069	0.003659	0.004521	0.006075	0.006878	0.00775	0.006977	0.01444	0.032324	0.252939	0.589119	0.707205	0.858964	0.91011
7.8	0.001709	0.00242	0.002336	0.003463	0.004521	0.00601	0.006979	0.007708	0.006433	0.0146	0.032374	0.255024	0.593018	0.709751	0.859759	0.913556
7.9	0.001714	0.002504	0.00225	0.00347	0.004756	0.005895	0.006555	0.007204	0.006908	0.015073	0.033623	0.255566	0.599024	0.713072	0.866422	0.915135
8	0.001641	0.0022	0.002175	0.003576	0.004867	0.005953	0.006794	0.00789	0.006679	0.014899	0.033616	0.260562	0.596627	0.716107	0.869399	0.91568
8.1	0.001521	0.002458	0.002154	0.003511	0.004671	0.005851	0.006834	0.007727	0.007013	0.01517	0.033428	0.260458	0.605441	0.717131	0.873591	0.919544
8.2	0.001762	0.002359	0.002292	0.003415	0.00468	0.006051	0.006861	0.007814	0.00708	0.015425	0.033983	0.264206	0.60571	0.726067	0.876454	0.920938
8.3	0.001818	0.00242	0.002108	0.00358	0.004586	0.006279	0.006916	0.00778	0.007054	0.016063	0.034709	0.266187	0.604887	0.72603	0.877797	0.923756
8.4	0.0017	0.002411	0.002306	0.003684	0.004742	0.005973	0.006636	0.007802	0.006794	0.01572	0.035393	0.268608	0.6102	0.73312	0.879427	0.92834
8.5	0.001572	0.002497	0.002138	0.003465	0.004894	0.005983	0.006804	0.008	0.006894	0.015975	0.035727	0.269345	0.614491	0.733426	0.882627	0.92522
8.6	0.001707	0.002501	0.00226	0.003835	0.004793	0.005976	0.00714	0.007839	0.007059	0.015856	0.034933	0.272154	0.615869	0.738529	0.884938	0.936833
8.7	0.001411	0.002519	0.002184	0.003693	0.004841	0.006449	0.00719	0.007987	0.007483	0.015762	0.036559	0.272748	0.62088	0.739008	0.886385	0.937118
8.8	0.001765	0.002365	0.002354	0.003684	0.004791	0.006196	0.006967	0.00818	0.007145	0.016192	0.036194	0.276362	0.622961	0.743702	0.886049	0.937967
8.9	0.001532	0.002579	0.002361	0.003767	0.004653	0.00619	0.006838	0.007853	0.007055	0.016113	0.037033	0.277573	0.62704	0.743009	0.889038	0.940342
9	0.00185	0.002412	0.002317	0.003783	0.004613	0.005865	0.006923	0.008109	0.007098	0.016588	0.037521	0.280918	0.628211	0.745554	0.892519	0.942256
9.1	0.001647	0.002432	0.002253	0.003378	0.004698	0.006305	0.007331	0.008302	0.007031	0.016652	0.037409	0.284071	0.632431	0.747977	0.897646	0.944244
9.2	0.001684	0.00245	0.002397	0.003583	0.004657	0.006118	0.006717	0.008208	0.007538	0.016741	0.038002	0.286243	0.632456	0.750687	0.897579	0.946556
9.3	0.00167	0.002727	0.002365	0.003902	0.004767	0.0063	0.007179	0.008256	0.007485	0.017296	0.038295	0.28758	0.633306	0.752282	0.897965	0.951176
9.4	0.001693	0.002556	0.002262	0.00359	0.004705	0.006261	0.007138	0.008042	0.007901	0.017264	0.038747	0.289645	0.636	0.754606	0.899217	0.949844
9.5	0.001815	0.002448	0.002402	0.003737	0.004961	0.006192	0.007045	0.008249	0.007614	0.017544	0.03832	0.294381	0.643393	0.758527	0.900819	0.948538
9.6	0.00165	0.002568	0.002287	0.003684	0.004494	0.006417	0.007605	0.008559	0.007696	0.017515	0.038803	0.29343	0.642978	0.760476	0.903264	0.952654
9.7	0.001673	0.002568	0.002319	0.003622	0.004576	0.006213	0.007421	0.008518	0.007906	0.018039	0.039403	0.296567	0.647417	0.760733	0.904741	0.955914
9.8	0.001726	0.00269	0.002289	0.003702	0.004629	0.006381	0.00749	0.008184	0.007809	0.018081	0.039316	0.298201	0.644233	0.765047	0.906817	0.954794
9.9	0.001845	0.002729	0.002112	0.003589	0.004517	0.006217	0.007119	0.008343	0.007987	0.018223	0.040322	0.299572	0.646129	0.765756	0.910183	0.956669
10	0.001801	0.002669	0.002266	0.003645	0.004988	0.00619	0.007292	0.008136	0.00801	0.018117	0.040657	0.301482	0.651655	0.769682	0.913803	0.96096
10.1	0.001659	0.002579	0.002313	0.003702	0.005071	0.006663	0.007321	0.008431	0.008132	0.01844	0.040142	0.304392	0.652268	0.772984	0.917128	0.957021
10.2	0.001723	0.00269	0.002365	0.003863	0.005152	0.006797	0.007379	0.008713	0.0082	0.018996	0.041403	0.307223	0.656343	0.77398	0.917576	0.96261
10.3	0.001673	0.002496	0.002375	0.003849	0.004825	0.005991	0.007506	0.008599	0.008334	0.018615	0.041499	0.306795	0.659133	0.776343	0.919067	0.966593
10.4	0.001735	0.002519	0.002338	0.003787	0.004975	0.006456	0.007526	0.008527	0.008309	0.018706	0.041847	0.30941	0.660859	0.775323	0.922337	0.966784
10.5	0.001717	0.002715	0.002372	0.003843	0.004882	0.006611	0.007087	0.008771	0.008348	0.018506	0.041969	0.310113	0.663142	0.776959	0.925004	0.968079
10.6	0.001818	0.002669	0.002328	0.003861	0.004735	0.006364	0.00713	0.00847	0.008249	0.018538	0.042254	0.309733	0.66238	0.775492	0.919346	0.968155
10.7	0.001937	0.002759	0.002476	0.003845	0.005081	0.006376	0.007558	0.008858	0.008178	0.018884	0.042344	0.314919	0.66527	0.781168	0.923763	0.971142
10.8	0.001627	0.002618	0.00237	0.004098	0.005097	0.006516	0.007579	0.008859	0.00826	0.019852	0.043324	0.316546	0.667292	0.784891	0.927652	0.973457
10.9	0.001824	0.002825	0.002216	0.003847	0.004905	0.006749	0.007345	0.008843	0.008332	0.019532	0.042337	0.318041	0.666589	0.785878	0.92875	0.968256
11	0.001793	0.002595	0.002344	0.003863	0.00492	0.00635	0.007657	0.009013	0.008578	0.01905	0.044122	0.318524	0.669479	0.787122	0.927335	0.97414
11.1	0.001663	0.002695	0.00228	0.003679	0.005161	0.006748	0.007487	0.009091	0.008477	0.019558	0.043814	0.31912	0.674025	0.792452	0.929545	0.976607
11.2	0.001774	0.002547	0.002471	0.00381	0.005101	0.006698	0.007782	0.009305	0.008461	0.019813	0.042975	0.32083	0.673109	0.793648	0.933361	0.976132
11.3	0.00185	0.002612	0.002397	0.003769	0.005214	0.006297	0.007331	0.008582	0.008663	0.020181	0.043853	0.324217	0.674594	0.794177	0.931067	0.978615
11.4	0.001815	0.002734	0.002358	0.003732	0.005115	0.006725	0.007536	0.009257	0.008771	0.019882	0.044484	0.327245	0.6757	0.793124	0.933149	0.977727
11.5	0.001937	0.002584	0.002361	0.003824	0.005196	0.006693	0.007363	0.009045	0.00853	0.020524	0.045515	0.329107	0.676979	0.795662	0.930781	0.977414
11.6	0.001712	0.002715	0.00252	0.003755	0.005203	0.006963	0.007651	0.009072	0.008649	0.020375	0.044284	0.329231	0.680647	0.79544	0.937205	0.97859
11.7	0.001585	0.002603	0.002446	0.003789	0.005073	0.006498	0.00804	0.009054	0.008751	0.020006	0.044268	0.330729	0.6796	0.797353	0.932468	0.977246
11.8	0.001857	0.002655	0.002209	0.003599	0.004952	0.006346	0.007503	0.009151	0.008833	0.020513	0.046016	0.333973	0.683668	0.799046	0.939766	0.983012
11.9	0.001845	0.002703	0.002432	0.003649	0.005241	0.006748	0.00778	0.00899	0.008884	0.021125	0.045607	0.331721	0.684978	0.800923	0.935781	0.984464
12	0.001758	0.002708	0.002552	0.003888	0.005202	0.006815	0.007902	0.009087	0.009162	0.020738	0.04702	0.334587	0.685205	0.800756	0.935537	0.98277
12.1	0.001739	0.002779	0.002453	0.003702	0.004906	0.006516	0.007788	0.009434	0.009054	0.020938	0.046474	0.335515	0.686517	0.80389	0.939465	0.98344
12.2	0.001827	0.002881	0.002448	0.003751	0.005131	0.006647	0.007913	0.009519	0.009024	0.021084	0.046205	0.337459	0.69379	0.801347	0.943777	0.985672
12.3	0.001746	0.002649	0.002496	0.004094	0.004959	0.006792	0.007945	0.009447	0.00931	0.021298	0.047003	0.340843	0.689234	0.802177	0.941589	0.984117
12.4	0.001763	0.002763	0.002535	0.003815	0.004949	0.006951	0.007556	0.009653	0.009217	0.021316	0.047333	0.340729	0.689653	0.804394	0.942189	0.989271
12.5	0.001599	0.002619	0.002361	0.003691	0.005	0.006753	0.007372	0.009563	0.009187	0.02159	0.047096	0.343145	0.689038	0.807636	0.944103	0.985122
12.6	0.001769	0.002894	0.002618	0.003797	0.005235	0.00664	0.007729	0.009195	0.009238	0.021445	0.047473	0.344824	0.692384	0.807362	0.940949	0.986652
12.7	0.001942	0.002741	0.00245	0.003974	0.00526	0.006652	0.007989	0.009461	0.009098	0.021668	0.047926	0.346115	0.69732	0.807504	0.944713	0.988514
12.8	0.001822	0.002812	0.002402	0.00379	0.00512	0.006753	0.007779	0.009266	0.00919	0.021417	0.048411	0.345775	0.697647	0.811729	0.948072	0.989554
12.9	0.001716	0.002595	0.002496	0.003682	0.005223	0.006861	0.007853	0.009445	0.00916	0.021958	0.048621	0.347737	0.698675	0.817055	0.94374	0.990152
13	0.001707	0.002766	0.00254	0.003755	0.004828	0.007147	0.007696	0.00936	0.009689	0.021693	0.048384	0.351899	0.699727	0.820459	0.944989	0.989441
13.1	0.001855	0.002641	0.002255	0.003781	0.005371	0.006602	0.007671	0.009487	0.00922	0.023175	0.048653	0.35339	0.702743	0.816015	0.945671	0.992906
13.2	0.001769	0.002773	0.00257	0.003827	0.005235	0.006834	0.007913	0.0095	0.0096	0.022317	0.04933	0.350116	0.704595	0.820564	0.945963	0.993741
13.3	0.001862	0.002816	0.002391	0.003712	0.005	0.006558	0.008067	0.009462	0.009447	0.022321	0.049548	0.35291	0.70223	0.818604	0.945769	0.993583
13.4	0.00188	0.002626	0.002349	0.003898	0.005113	0.006862	0.007669	0.009224	0.009372	0.0228	0.0503	0.355422	0.705909	0.818236	0.945141	0.989697
13.5	0.001804	0.003055	0.00243	0.003691	0.005037	0.006629	0.008109	0.009809	0.009289	0.022607	0.050761	0.356856	0.706173	0.820099	0.948358	0.99119
13.6	0.001877	0.002676	0.002372	0.003771	0.005081	0.006921	0.007947	0.0095	0.009659	0.022777	0.049153	0.357185	0.705216	0.819801	0.949198	0.995332
13.7	0.001907	0.002932	0.002283	0.003859	0.004873	0.007038	0.007673	0.009478	0.009867	0.022965	0.049861	0.35875	0.711104	0.821232	0.948172	0.993946
13.8	0.001739	0.003017	0.002414	0.004033	0.005193	0.006705	0.007715	0.009599	0.009337	0.023584	0.050807	0.359217	0.708477	0.822274	0.950636	0.992557
13.9	0.001792	0.002775	0.002345	0.003815	0.005242	0.006997	0.008085	0.009724	0.009919	0.022738	0.050255	0.359957	0.713663	0.821922	0.950553	0.993909
14	0.001763	0.00278	0.002243	0.00393	0.005048	0.00694	0.007752	0.009634	0.00945	0.023207	0.050269	0.361073	0.71047	0.823887	0.948737	0.990944
14.1	0.001954	0.00272	0.002612	0.003877	0.005306	0.006795	0.008078	0.009563	0.009611	0.023552	0.051516	0.363464	0.711907	0.82689	0.94972	0.994934
14.2	0.001732	0.002835	0.002352	0.003836	0.004949	0.006983	0.008166	0.009742	0.00957	0.023532	0.050943	0.363671	0.713033	0.825995	0.951227	0.995205
14.3	0.001878	0.002968	0.002377	0.003843	0.005122	0.007168	0.008221	0.00988	0.009919	0.023819	0.051861	0.365282	0.708551	0.823486	0.949412	0.992181
14.4	0.001749	0.002796	0.002384	0.00398	0.005044	0.006693	0.00809	0.009588	0.009981	0.023504	0.052132	0.367479	0.715805	0.825242	0.951133	0.994271
14.5	0.00182	0.002775	0.002664	0.003932	0.004963	0.006804	0.007849	0.009763	0.009745	0.024298	0.052316	0.365174	0.714645	0.82452	0.949412	0.993069
14.6	0.001848	0.002853	0.002575	0.003767	0.005241	0.006813	0.007782	0.009685	0.009802	0.023378	0.05146	0.368338	0.717405	0.824902	0.955535	0.992952
14.7	0.001843	0.002915	0.002612	0.003776	0.005541	0.006742	0.007885	0.009682	0.010147	0.024334	0.05251	0.368912	0.72057	0.827262	0.956197	0.995449
14.8	0.001901	0.00281	0.002602	0.003698	0.005073	0.006979	0.008049	0.009871	0.009991	0.024001	0.052654	0.37236	0.71991	0.824879	0.953192	0.994712
14.9	0.001608	0.002989	0.002458	0.00384	0.005232	0.007216	0.00847	0.009728	0.010053	0.024095	0.052581	0.37357	0.715916	0.827594	0.952981	0.992959
15	0.001921	0.003044	0.002388	0.003815	0.005156	0.006656	0.008392	0.010013	0.010405	0.024181	0.053045	0.370643	0.716355	0.829255	0.948517	0.999224
15.1	0.00194	0.00272	0.002368	0.004117	0.005426	0.007117	0.007977	0.009866	0.009761	0.024535	0.052551	0.37499	0.7193	0.832055	0.952447	0.997236
15.2	0.001758	0.002848	0.002519	0.003948	0.005265	0.007183	0.007742	0.00994	0.010147	0.024829	0.054051	0.374842	0.720237	0.829628	0.954662	0.994957
15.3	0.001854	0.002897	0.002389	0.00396	0.005649	0.007165	0.007763	0.009696	0.010113	0.024675	0.053991	0.376241	0.718601	0.827552	0.951922	1
15.4	0.001878	0.002842	0.00231	0.004075	0.005364	0.007027	0.007872	0.009882	0.010375	0.024786	0.053858	0.37542	0.721105	0.828074	0.958784	0.997982
15.5	0.001739	0.002895	0.002168	0.003895	0.005021	0.006937	0.008023	0.009692	0.010426	0.024708	0.054979	0.378609	0.725976	0.827893	0.949561	0.994533
15.6	0.001854	0.00274	0.002536	0.003912	0.005223	0.006792	0.008339	0.009813	0.010561	0.024811	0.054864	0.377093	0.72511	0.83214	0.949203	0.99121
15.7	0.001885	0.002722	0.002481	0.003942	0.005257	0.007062	0.007803	0.010228	0.010273	0.025119	0.054765	0.382012	0.722676	0.831609	0.95542	0.995012
15.8	0.001617	0.003106	0.00246	0.003893	0.005193	0.006866	0.008474	0.010248	0.010402	0.025186	0.05426	0.378988	0.725586	0.831107	0.94957	0.996401
15.9	0.001861	0.002871	0.00252	0.004082	0.00518	0.007064	0.007984	0.009779	0.010632	0.024829	0.056265	0.380436	0.728755	0.836064	0.949425	0.99466
16	0.001806	0.00289	0.002554	0.004047	0.005389	0.006951	0.008147	0.009885	0.010435	0.025142	0.054949	0.381982	0.727367	0.834722	0.955988	0.993268
16.1	0.001668	0.002973	0.002299	0.004001	0.005501	0.007253	0.008185	0.010117	0.010294	0.025209	0.055204	0.382847	0.725108	0.833565	0.94908	0.994452
16.2	0.001749	0.002994	0.002492	0.0039	0.004929	0.00693	0.008302	0.010104	0.011137	0.024721	0.055701	0.384683	0.728322	0.830792	0.954177	0.995736
16.3	0.001843	0.003021	0.002671	0.003918	0.005472	0.007002	0.008355	0.010326	0.010451	0.025893	0.056833	0.384842	0.726102	0.829188	0.949674	0.994119
16.4	0.00179	0.003047	0.002458	0.003928	0.005257	0.00682	0.008115	0.010087	0.010752	0.025524	0.056453	0.38608	0.732669	0.832271	0.952649	0.996666
16.5	0.001647	0.002844	0.002526	0.003995	0.005686	0.007071	0.007842	0.010011	0.010826	0.025885	0.056481	0.385815	0.729501	0.832534	0.953986	0.992437
16.6	0.001983	0.003062	0.00254	0.003718	0.005133	0.006737	0.007984	0.010532	0.010861	0.025733	0.05673	0.387663	0.729284	0.831662	0.956354	0.999151
16.7	0.001663	0.002909	0.002434	0.003965	0.005325	0.006928	0.00818	0.010096	0.010623	0.025637	0.056478	0.386752	0.730711	0.836922	0.950488	0.990937
16.8	0.001735	0.002908	0.002303	0.003787	0.005212	0.007363	0.00804	0.010104	0.010425	0.025664	0.057434	0.387955	0.727602	0.832518	0.952071	0.996213
16.9	0.00159	0.003157	0.002611	0.003939	0.005287	0.007264	0.008295	0.010409	0.010847	0.025925	0.05667	0.389188	0.730207	0.833258	0.954354	0.995433
17	0.0019	0.002894	0.002662	0.003769	0.00564	0.007069	0.008168	0.009979	0.01081	0.025966	0.057256	0.390265	0.732108	0.83689	0.951531	0.995959
17.1	0.001781	0.002848	0.002499	0.004116	0.005092	0.007023	0.008124	0.010257	0.011176	0.026603	0.057532	0.391308	0.730184	0.831701	0.953661	0.995946
17.2	0.001701	0.002993	0.002542	0.003889	0.005292	0.007349	0.007927	0.010028	0.010943	0.026615	0.058573	0.392486	0.731088	0.836284	0.948717	0.993256
17.3	0.001728	0.002832	0.002372	0.004234	0.004991	0.006801	0.008267	0.010173	0.010968	0.026689	0.059224	0.392278	0.733486	0.833857	0.948406	0.996288
17.4	0.001762	0.002904	0.002526	0.003826	0.005285	0.007124	0.008323	0.009935	0.010938	0.026224	0.057933	0.39617	0.740262	0.835651	0.946595	0.993734
17.5	0.001719	0.002886	0.002466	0.003995	0.005702	0.007096	0.008444	0.010071	0.010676	0.026889	0.058239	0.394794	0.734192	0.829924	0.949	0.992566
17.6	0.002057	0.00289	0.002512	0.004125	0.005448	0.006986	0.008682	0.010027	0.010982	0.026146	0.058278	0.395592	0.738071	0.834563	0.946559	0.993539
17.7	0.001866	0.003139	0.002612	0.004098	0.005012	0.00731	0.008421	0.010432	0.010948	0.026454	0.059421	0.394641	0.732285	0.835481	0.947369	0.995794
17.8	0.001781	0.00304	0.002542	0.004034	0.005216	0.006931	0.008223	0.010239	0.010869	0.02665	0.059323	0.397212	0.73783	0.836875	0.949486	0.990992
17.9	0.001815	0.002908	0.002584	0.003919	0.005083	0.007165	0.008228	0.01026	0.011275	0.027149	0.058609	0.398265	0.737132	0.834045	0.948683	0.987548
18	0.001753	0.003049	0.00257	0.004038	0.005382	0.006721	0.008323	0.010179	0.010892	0.027004	0.059267	0.397262	0.739988	0.835548	0.949012	0.991774
18.1	0.001792	0.003055	0.002473	0.003942	0.005157	0.006956	0.008168	0.010393	0.011067	0.027404	0.059392	0.397646	0.733744	0.835778	0.946055	0.993622
18.2	0.001809	0.003001	0.002386	0.004022	0.005389	0.006806	0.008352	0.010329	0.011107	0.027103	0.060006	0.401331	0.735497	0.834614	0.948576	0.988887
18.3	0.001915	0.002835	0.002575	0.004052	0.005396	0.007554	0.00827	0.010242	0.011021	0.026992	0.060135	0.401452	0.736834	0.831664	0.946612	0.986309
18.4	0.001793	0.003221	0.002623	0.004133	0.005145	0.007138	0.008327	0.01009	0.011123	0.027469	0.060475	0.399384	0.73509	0.835159	0.946987	0.995382
18.5	0.001848	0.002849	0.002542	0.004057	0.005389	0.007027	0.008594	0.010276	0.011291	0.027574	0.060038	0.40283	0.7423	0.833641	0.943924	0.990594
18.6	0.001709	0.003051	0.002513	0.003944	0.005334	0.006976	0.008679	0.010418	0.011175	0.027438	0.061497	0.403569	0.738318	0.838673	0.946043	0.990085
18.7	0.001838	0.003141	0.002745	0.003988	0.005453	0.00726	0.008292	0.010504	0.011459	0.027844	0.061722	0.40429	0.73896	0.83408	0.947988	0.98717
18.8	0.00176	0.002841	0.002439	0.00407	0.005414	0.007291	0.008334	0.010423	0.01093	0.027579	0.061147	0.403905	0.736093	0.834642	0.943671	0.985299
18.9	0.001714	0.002987	0.002618	0.004006	0.005601	0.006756	0.00821	0.010096	0.011544	0.027984	0.061092	0.405688	0.737195	0.83416	0.943492	0.986669
19	0.00191	0.003044	0.002435	0.004043	0.005679	0.007008	0.008102	0.010269	0.011463	0.028971	0.061876	0.404096	0.737664	0.836029	0.945862	0.987617
19.1	0.001824	0.003026	0.002366	0.004003	0.00555	0.007105	0.008516	0.010587	0.011429	0.028295	0.061149	0.404391	0.742142	0.836965	0.943339	0.984789
19.2	0.001822	0.003106	0.002573	0.003995	0.005419	0.007062	0.008398	0.010563	0.011374	0.028453	0.06261	0.407683	0.739884	0.8331	0.941856	0.987211
19.3	0.001841	0.002805	0.002386	0.004245	0.005513	0.007425	0.008016	0.010501	0.011305	0.027604	0.061067	0.406271	0.741283	0.837064	0.94366	0.987239
19.4	0.001737	0.002807	0.002621	0.004086	0.005269	0.007046	0.008396	0.010239	0.011507	0.028764	0.062726	0.408436	0.740618	0.831538	0.942797	0.984476
19.5	0.001778	0.003024	0.002478	0.00379	0.005067	0.00725	0.008567	0.010632	0.011429	0.028776	0.06207	0.410134	0.740317	0.833213	0.942753	0.985293
19.6	0.001949	0.002986	0.002678	0.003932	0.005356	0.007039	0.008242	0.010573	0.011427	0.028633	0.062797	0.412228	0.738737	0.833516	0.944379	0.986075
19.7	0.001889	0.003056	0.002391	0.004188	0.005463	0.007443	0.008536	0.010603	0.011397	0.02886	0.061865	0.4091	0.738646	0.833901	0.94148	0.984384
19.8	0.001954	0.003078	0.002485	0.003884	0.00512	0.007266	0.008237	0.010548	0.011613	0.028723	0.063612	0.410306	0.740421	0.834367	0.941382	0.984016
19.9	0.001742	0.003053	0.002756	0.003946	0.005524	0.00693	0.008522	0.010225	0.011822	0.028649	0.062737	0.410035	0.743062	0.834107	0.941522	0.985842
20	0.001813	0.00298	0.002446	0.004034	0.005449	0.007237	0.008769	0.010575	0.011617	0.028665	0.063352	0.411224	0.74014	0.832975	0.943989	0.985442
20.1	0.001755	0.003099	0.002664	0.004176	0.005228	0.007115	0.008782	0.010739	0.011408	0.029061	0.062822	0.410212	0.741299	0.833373	0.941223	0.983454
20.2	0.001753	0.002812	0.002443	0.003964	0.005241	0.007168	0.008732	0.010435	0.011788	0.028536	0.062748	0.412563	0.744979	0.831781	0.940556	0.987294
20.3	0.001871	0.003044	0.002487	0.004049	0.005253	0.006965	0.008548	0.01084	0.01159	0.028518	0.063388	0.413875	0.740421	0.834734	0.937932	0.983608
20.4	0.001797	0.00295	0.002515	0.004084	0.005356	0.007008	0.008472	0.010234	0.011801	0.029755	0.063413	0.412718	0.747098	0.8322	0.938406	0.982867
20.5	0.001946	0.002878	0.002642	0.004036	0.005348	0.00719	0.00852	0.010449	0.011762	0.02942	0.063826	0.414715	0.741845	0.833263	0.941023	0.979727
20.6	0.001894	0.003201	0.002381	0.004114	0.005428	0.007055	0.008488	0.010637	0.011909	0.029213	0.064231	0.41578	0.743271	0.832508	0.937999	0.984045
20.7	0.001825	0.003056	0.002618	0.004091	0.00523	0.007206	0.008681	0.01046	0.011512	0.029174	0.064009	0.414947	0.744325	0.834119	0.934129	0.981636
20.8	0.001919	0.003081	0.002519	0.004121	0.005221	0.007094	0.008782	0.011014	0.011769	0.029896	0.06443	0.414186	0.744212	0.831284	0.936743	0.982568
20.9	0.001848	0.002961	0.002589	0.003939	0.005221	0.007289	0.008628	0.010543	0.011829	0.029335	0.064635	0.415051	0.744288	0.827396	0.93626	0.986171
21	0.00194	0.003081	0.002648	0.004155	0.005166	0.007064	0.008672	0.010235	0.011695	0.029351	0.06531	0.416498	0.745736	0.833072	0.937153	0.979184
21.1	0.001746	0.003164	0.002448	0.004098	0.005324	0.007013	0.008495	0.010601	0.011955	0.029387	0.064407	0.417128	0.743617	0.831305	0.935123	0.98336
21.2	0.001848	0.002994	0.002538	0.003626	0.005379	0.007329	0.008267	0.010621	0.011951	0.029724	0.063977	0.415513	0.743497	0.82984	0.933687	0.97767
21.3	0.001774	0.002998	0.002481	0.003951	0.005186	0.007004	0.008371	0.010433	0.012338	0.02982	0.064407	0.417403	0.743845	0.829819	0.931619	0.979697
21.4	0.001926	0.002959	0.002457	0.003857	0.005364	0.007243	0.008567	0.010888	0.011958	0.030114	0.064953	0.419796	0.744657	0.827251	0.934858	0.976995
21.5	0.001793	0.002925	0.002497	0.003762	0.005426	0.007538	0.008697	0.010571	0.011817	0.029983	0.065385	0.418189	0.745964	0.831774	0.933363	0.97679
21.6	0.001746	0.002975	0.002676	0.004089	0.005531	0.007191	0.008598	0.0108	0.012092	0.029919	0.064713	0.420831	0.746309	0.829069	0.934079	0.973351
21.7	0.001907	0.002975	0.002379	0.003957	0.005287	0.007455	0.00856	0.01057	0.012092	0.030398	0.066066	0.421305	0.745862	0.827615	0.930402	0.973015
21.8	0.001984	0.003113	0.002545	0.003861	0.005301	0.00726	0.008672	0.0108	0.011914	0.030117	0.066656	0.417766	0.743725	0.830972	0.927666	0.976041
21.9	0.001625	0.003007	0.002628	0.003787	0.005094	0.007536	0.00849	0.011166	0.01222	0.030347	0.066559	0.419841	0.745036	0.829354	0.925604	0.974098
22	0.00177	0.002977	0.002619	0.004179	0.005619	0.007211	0.008804	0.010932	0.011999	0.030363	0.066646	0.422929	0.746812	0.826761	0.927691	0.972085
22.1	0.001772	0.003345	0.00268	0.003812	0.005142	0.007156	0.00852	0.010616	0.012032	0.030053	0.065775	0.422874	0.746026	0.824618	0.92894	0.973433
22.2	0.001816	0.002938	0.00251	0.003877	0.005591	0.007501	0.008557	0.010658	0.012206	0.03026	0.065883	0.421799	0.74214	0.827	0.932137	0.972621
22.3	0.001868	0.003014	0.002556	0.003826	0.005456	0.007225	0.008355	0.010655	0.012147	0.03049	0.066992	0.4228	0.743474	0.827004	0.930215	0.978732
22.4	0.001806	0.00306	0.002554	0.004082	0.005635	0.007356	0.008624	0.010796	0.012055	0.030487	0.067153	0.422763	0.742326	0.827874	0.935323	0.973088
22.5	0.001845	0.003055	0.002579	0.003651	0.005439	0.007099	0.008552	0.010814	0.012057	0.030929	0.066331	0.425532	0.744493	0.82741	0.930751	0.972729
22.6	0.001894	0.003169	0.00257	0.004043	0.005203	0.007273	0.008346	0.010849	0.012283	0.030501	0.066341	0.423926	0.741417	0.826303	0.929313	0.970014
22.7	0.001698	0.002943	0.002733	0.003727	0.005221	0.007103	0.008355	0.010741	0.012421	0.03129	0.066497	0.424989	0.742147	0.828772	0.929778	0.968051
22.8	0.001783	0.002966	0.002558	0.003935	0.005734	0.006905	0.008603	0.010819	0.012413	0.030361	0.067015	0.423541	0.745519	0.827393	0.9253	0.970852
22.9	0.001917	0.003134	0.002589	0.003916	0.005414	0.007163	0.008474	0.01055	0.012503	0.030697	0.067774	0.425361	0.742264	0.823627	0.92577	0.969899
23	0.001873	0.002904	0.002591	0.00419	0.005347	0.007439	0.00821	0.010555	0.012317	0.030731	0.067067	0.422556	0.741928	0.826411	0.928199	0.969255
23.1	0.001871	0.002978	0.002421	0.004011	0.005398	0.007497	0.008509	0.011106	0.012505	0.030618	0.067767	0.428235	0.742726	0.82928	0.927652	0.963588
23.2	0.001781	0.003032	0.002646	0.003813	0.005389	0.007367	0.008893	0.010693	0.012015	0.031214	0.06735	0.42563	0.744912	0.831116	0.927815	0.963829
23.3	0.001866	0.003076	0.002312	0.003889	0.005184	0.006974	0.008898	0.010943	0.012784	0.03107	0.068278	0.42638	0.745213	0.828836	0.92606	0.965067
23.4	0.002046	0.003295	0.002545	0.004057	0.005216	0.0072	0.008651	0.010402	0.012506	0.031429	0.069005	0.423889	0.743633	0.832267	0.925401	0.966397
23.5	0.001857	0.00295	0.00249	0.003972	0.005394	0.007291	0.008553	0.010276	0.012685	0.031353	0.068375	0.429121	0.743233	0.835223	0.922755	0.96729
23.6	0.001831	0.002938	0.002428	0.003914	0.005616	0.007237	0.008522	0.010929	0.012515	0.031378	0.069085	0.426686	0.740706	0.830643	0.920572	0.962493
23.7	0.00191	0.00303	0.002443	0.00379	0.005359	0.007685	0.008806	0.011293	0.012377	0.030968	0.069055	0.429155	0.740664	0.831103	0.922624	0.962219
23.8	0.001831	0.003104	0.002531	0.003877	0.005414	0.007421	0.008636	0.011054	0.012632	0.031649	0.068181	0.429275	0.742742	0.829066	0.924555	0.966793
23.9	0.001965	0.003055	0.002504	0.00388	0.005306	0.007368	0.008424	0.01112	0.01248	0.031076	0.068759	0.426808	0.743196	0.823979	0.922898	0.962771
24	0.001678	0.002918	0.002519	0.003928	0.005391	0.00748	0.00905	0.011012	0.01265	0.031288	0.069256	0.43047	0.742931	0.826317	0.921073	0.963501
24.1	0.001829	0.003221	0.002487	0.003988	0.005478	0.007466	0.008453	0.010669	0.012413	0.031263	0.068303	0.427285	0.742181	0.826278	0.916663	0.962523
24.2	0.001728	0.002977	0.002623	0.003923	0.005483	0.007282	0.008711	0.010524	0.013042	0.031502	0.069601	0.430573	0.74317	0.828139	0.921135	0.964257
24.3	0.001841	0.002996	0.002512	0.00382	0.005495	0.007287	0.008621	0.010548	0.012545	0.032033	0.068881	0.431802	0.740612	0.825035	0.919399	0.96405
24.4	0.001694	0.003238	0.002428	0.003909	0.005428	0.007262	0.008631	0.010313	0.012533	0.031415	0.070102	0.429499	0.740473	0.826945	0.918365	0.959633
24.5	0.001701	0.003058	0.002577	0.003896	0.005202	0.007303	0.008424	0.011054	0.013224	0.031502	0.069442	0.429553	0.742701	0.825953	0.922083	0.962136
24.6	0.001891	0.003146	0.002405	0.004027	0.005242	0.007206	0.00844	0.010732	0.012729	0.032031	0.06981	0.431157	0.741092	0.825684	0.922878	0.960153
24.7	0.001687	0.002964	0.002724	0.003925	0.005368	0.007671	0.008751	0.010907	0.012789	0.032109	0.068881	0.433201	0.742298	0.825095	0.915331	0.952831
24.8	0.001806	0.00303	0.002603	0.003716	0.005759	0.007234	0.008422	0.010927	0.012706	0.032278	0.070951	0.431648	0.74191	0.826705	0.917495	0.956945
24.9	0.001878	0.0031	0.002405	0.003992	0.005348	0.007043	0.0091	0.010757	0.012676	0.031875	0.070654	0.431571	0.74282	0.823585	0.914783	0.95873
25	0.00185	0.003085	0.002414	0.004156	0.005591	0.007073	0.008755	0.0109	0.013051	0.032505	0.07143	0.43349	0.740108	0.823707	0.912818	0.96146
25.1	0.001869	0.003097	0.002375	0.003992	0.005426	0.007289	0.008497	0.011081	0.012987	0.031949	0.070654	0.432605	0.740989	0.821637	0.91709	0.955212
25.2	0.001917	0.003171	0.002446	0.003941	0.005402	0.006891	0.009148	0.011226	0.012828	0.032059	0.069759	0.434871	0.740906	0.819603	0.912091	0.955153
25.3	0.001829	0.00297	0.002642	0.003972	0.005352	0.007338	0.008767	0.011206	0.012966	0.032314	0.070139	0.433613	0.744728	0.823806	0.913167	0.953899
25.4	0.001721	0.003104	0.002467	0.00376	0.005481	0.007313	0.008525	0.010768	0.012796	0.032071	0.071267	0.433755	0.738577	0.825498	0.91264	0.956045
25.5	0.001783	0.00306	0.002611	0.004064	0.005216	0.007352	0.008822	0.01101	0.013194	0.031882	0.070698	0.432402	0.741132	0.821729	0.909311	0.952552
25.6	0.001781	0.002987	0.002634	0.003919	0.005214	0.007294	0.008603	0.011261	0.012782	0.032501	0.070843	0.433387	0.739878	0.821749	0.910323	0.956001
25.7	0.001648	0.003189	0.002632	0.004151	0.005371	0.007312	0.0087	0.011274	0.012984	0.032061	0.070254	0.434537	0.739832	0.821381	0.908453	0.952932
25.8	0.001869	0.002986	0.002517	0.003856	0.005168	0.007476	0.008948	0.01101	0.012605	0.032572	0.071112	0.433366	0.741408	0.820951	0.907537	0.952583
25.9	0.001726	0.003182	0.002589	0.003951	0.005225	0.007418	0.008461	0.010722	0.013228	0.032698	0.071534	0.431309	0.740775	0.819255	0.910567	0.94784
26	0.001838	0.003221	0.002443	0.004013	0.005501	0.007405	0.008575	0.011272	0.013209	0.032901	0.07154	0.432524	0.742544	0.819451	0.910361	0.95076
26.1	0.00191	0.003123	0.002763	0.004061	0.005253	0.007124	0.00901	0.011634	0.013221	0.032342	0.072222	0.436488	0.741219	0.817345	0.906612	0.951726
26.2	0.001845	0.003323	0.002644	0.003911	0.005329	0.007071	0.008939	0.010989	0.013186	0.033023	0.071602	0.437623	0.738279	0.821422	0.905984	0.950021
26.3	0.001921	0.003238	0.0026	0.00379	0.005317	0.007395	0.008592	0.011114	0.013283	0.033179	0.072696	0.435508	0.73841	0.821719	0.907746	0.947856
26.4	0.001793	0.002982	0.002623	0.003958	0.005416	0.007457	0.00872	0.011129	0.012818	0.032892	0.072038	0.436045	0.7395	0.820512	0.903356	0.942739
26.5	0.001818	0.003138	0.002648	0.003849	0.005603	0.00745	0.008927	0.011196	0.012558	0.032798	0.072344	0.433842	0.739777	0.818135	0.903156	0.949416
26.6	0.001772	0.003106	0.002577	0.004155	0.005432	0.007444	0.008548	0.011297	0.013115	0.033759	0.073041	0.437814	0.734839	0.815838	0.902685	0.945558
26.7	0.001882	0.00315	0.002552	0.00411	0.005398	0.007128	0.00827	0.011014	0.013051	0.0339	0.072481	0.437749	0.735186	0.817596	0.900335	0.948687
26.8	0.001813	0.003244	0.002667	0.004082	0.005585	0.007669	0.008817	0.010738	0.012819	0.033669	0.072689	0.434089	0.738124	0.818141	0.898996	0.944911
26.9	0.00188	0.003131	0.002462	0.003882	0.005589	0.007623	0.008767	0.011045	0.01294	0.032991	0.072684	0.43587	0.741054	0.815442	0.898994	0.939964
27	0.001894	0.003086	0.002602	0.004119	0.005405	0.007384	0.009174	0.010826	0.013306	0.03289	0.073008	0.437745	0.739785	0.81477	0.900421	0.941209
27.1	0.001816	0.003129	0.002342	0.00387	0.005232	0.007333	0.008652	0.011266	0.01288	0.033706	0.072606	0.437239	0.73714	0.812477	0.899737	0.943973
27.2	0.001737	0.00312	0.002701	0.003866	0.00537	0.007324	0.00887	0.010759	0.013196	0.033642	0.07333	0.437223	0.737657	0.810774	0.897646	0.944069
27.3	0.001797	0.002987	0.002648	0.003882	0.005179	0.007455	0.008916	0.011378	0.013159	0.033644	0.072629	0.438438	0.73861	0.812637	0.896559	0.937468
27.4	0.001822	0.002955	0.002503	0.003822	0.005509	0.007103	0.008886	0.011328	0.013117	0.032949	0.072583	0.43843	0.735991	0.811757	0.896481	0.941536
27.5	0.001624	0.003067	0.002519	0.004034	0.005347	0.007469	0.008819	0.011003	0.013548	0.033669	0.072424	0.439139	0.73509	0.814469	0.89915	0.936766
27.6	0.001986	0.003058	0.002504	0.003804	0.005527	0.007478	0.008612	0.0113	0.013385	0.033568	0.073363	0.438525	0.738932	0.8146	0.894753	0.93822
27.7	0.001737	0.003111	0.002512	0.003849	0.005253	0.007508	0.008668	0.0111	0.013274	0.033814	0.073252	0.440686	0.736902	0.813622	0.898952	0.938379
27.8	0.001824	0.003021	0.002526	0.00393	0.005467	0.007347	0.008728	0.010867	0.013076	0.033646	0.07385	0.440018	0.739921	0.811773	0.895365	0.936418
27.9	0.001894	0.003276	0.002542	0.004091	0.005283	0.007384	0.008318	0.011098	0.013099	0.033276	0.073275	0.438226	0.735343	0.811547	0.892206	0.937138
28	0.001739	0.002943	0.002448	0.003949	0.005548	0.007165	0.008967	0.010713	0.013476	0.033226	0.073535	0.437409	0.734155	0.808956	0.890772	0.93677
28.1	0.001716	0.00324	0.002646	0.003902	0.00531	0.007609	0.008619	0.010962	0.013626	0.034107	0.073712	0.439057	0.73078	0.809009	0.891592	0.934999
28.2	0.001818	0.003164	0.002547	0.004056	0.00544	0.007009	0.0087	0.011277	0.013069	0.033603	0.073593	0.440594	0.737292	0.810979	0.889325	0.935456
28.3	0.001958	0.003044	0.002621	0.004125	0.005412	0.007149	0.008728	0.011213	0.013477	0.033856	0.073873	0.440228	0.730816	0.807953	0.890085	0.928204
28.4	0.001809	0.002931	0.002538	0.003856	0.00532	0.007342	0.008744	0.011475	0.013603	0.034371	0.073556	0.439248	0.734915	0.80807	0.889551	0.931209
28.5	0.001822	0.003039	0.002416	0.004061	0.005577	0.007358	0.009063	0.011445	0.013626	0.034411	0.075714	0.442078	0.735984	0.807297	0.891483	0.930574
28.6	0.001931	0.00323	0.002586	0.003831	0.005433	0.007377	0.008654	0.011171	0.013757	0.033677	0.07409	0.443506	0.73294	0.80718	0.886781	0.929953
28.7	0.001864	0.003085	0.002467	0.003994	0.005188	0.007328	0.008327	0.010444	0.013675	0.034113	0.074502	0.439068	0.730732	0.807969	0.887811	0.925774
28.8	0.001847	0.003078	0.002313	0.003794	0.005373	0.007283	0.008679	0.010743	0.013675	0.033842	0.075339	0.440624	0.731709	0.807451	0.886642	0.928508
28.9	0.001763	0.003131	0.002626	0.003953	0.005303	0.007285	0.008817	0.011178	0.013932	0.034088	0.075602	0.441067	0.72962	0.804608	0.884845	0.929522
29	0.001848	0.00307	0.002591	0.003849	0.005433	0.007593	0.008617	0.010869	0.013937	0.03448	0.075567	0.441203	0.727041	0.803075	0.885536	0.932979
29.1	0.001926	0.003272	0.002515	0.003918	0.005633	0.007528	0.008642	0.010863	0.013576	0.034346	0.076082	0.441102	0.729314	0.804957	0.885432	0.923382
29.2	0.001848	0.003063	0.00257	0.003803	0.005412	0.007446	0.008744	0.011259	0.013063	0.034337	0.075654	0.440028	0.730869	0.803906	0.883405	0.928911
29.3	0.001894	0.003152	0.002542	0.003928	0.005272	0.007459	0.008932	0.011162	0.013661	0.035098	0.074955	0.444185	0.728187	0.803409	0.881859	0.923761
29.4	0.001857	0.003139	0.002382	0.004001	0.005255	0.007283	0.008888	0.011065	0.013028	0.034289	0.075864	0.444443	0.728943	0.799442	0.882257	0.92612
29.5	0.001878	0.003152	0.002526	0.003918	0.005373	0.007237	0.008856	0.01147	0.013557	0.034521	0.074596	0.441772	0.726666	0.800231	0.883133	0.924021
29.6	0.001707	0.003062	0.002547	0.003995	0.005426	0.007326	0.008704	0.011636	0.013621	0.035199	0.075203	0.442708	0.732246	0.797343	0.880319	0.921846
29.7	0.001751	0.002885	0.002616	0.003836	0.005193	0.00719	0.008831	0.010978	0.013235	0.033939	0.075954	0.44173	0.730814	0.801657	0.880757	0.923621
29.8	0.001808	0.003143	0.002441	0.003916	0.005196	0.007517	0.008636	0.011505	0.013624	0.03439	0.075882	0.441203	0.729721	0.798782	0.879961	0.920882
29.9	0.001885	0.003017	0.002618	0.00361	0.005294	0.007381	0.008806	0.011353	0.014015	0.034746	0.075625	0.442689	0.725962	0.800418	0.874395	0.918382
30	0.001758	0.003369	0.0026	0.003872	0.005287	0.007153	0.008999	0.01159	0.013859	0.03519	0.076129	0.442565	0.727911	0.80116	0.880582	0.919175
30.1	0.001882	0.002927	0.0026	0.00401	0.005373	0.007273	0.008709	0.011848	0.013446	0.035522	0.075737	0.44421	0.727536	0.799186	0.875718	0.917197
30.2	0.001861	0.003228	0.002423	0.003882	0.005409	0.007207	0.008796	0.011295	0.013771	0.034749	0.075029	0.442328	0.729608	0.797658	0.876406	0.918239
30.3	0.001832	0.003127	0.002563	0.004052	0.00554	0.007379	0.008865	0.010828	0.014015	0.035165	0.076842	0.443072	0.728545	0.800017	0.875011	0.915897
30.4	0.001737	0.00306	0.002646	0.003866	0.005494	0.007485	0.008782	0.011435	0.013674	0.035184	0.076727	0.441215	0.727457	0.796506	0.874371	0.916256

## Sheet: secondary data n=1-3
Acp1-pep86 (nM)	amplitude
0.000251	0.005751	0.002873	0.001312
0.000753	0.003806	0.002401	0.000706
0.002258	0.006434	0.003183	0.002188
0.006774	0.012839	0.006622	0.003702
0.020322	0.022171	0.012659	0.005628
0.060966	0.041977	0.021288	0.007117
0.182899	0.063255	0.04066	0.009791
0.548697	0.119917	0.058309	0.011958
1.64609	0.231487	0.119368	0.033465
4.93827	0.356463	0.175598	0.074785
14.8148	0.541595	0.555777	0.442386
44.4444	0.79752	0.782761	0.745041
133.333	0.901582	0.886637	0.836616
400	0.993357	0.961699	0.956727
1200	0.994416	0.997066	0.997943
