# Supplementary material for: Towards a molecular mechanism underlying mitochondrial protein import through the TOM and TIM23 complexes
Source: eLife. 2022 Jun 8;11:e75426. doi: 10.7554/eLife.75426 (PMC9255969; doi:10.7554/eLife.75426)
Supplement: Figure 2—source data 1. [file elife-75426-fig2-data1.xlsx]

## Sheet: primary data n=1
	PCP-pep86		PCP-DHFR-pep86		PCP-pep86-DHFR
time	-MTX	+MTX	-MTX	+MTX	-MTX	+MTX
0	0.002483	0.002198	0.001475	0.000509	0.006751	0.000958
0.1	0.0071	0.006234	0.002398	0.000526	0.013114	0.002381
0.2	0.014701	0.013135	0.00368	0.000547	0.022282	0.004713
0.3	0.023483	0.022828	0.006134	0.000916	0.032505	0.008341
0.4	0.03598	0.033459	0.00842	0.000943	0.045542	0.012179
0.5	0.048869	0.047706	0.011587	0.001193	0.059475	0.017534
0.6	0.064071	0.062351	0.01552	0.001492	0.074625	0.02416
0.7	0.080304	0.077341	0.019404	0.001908	0.090208	0.030016
0.8	0.097732	0.095037	0.024229	0.002219	0.104477	0.03823
0.9	0.116614	0.113699	0.028649	0.002849	0.120089	0.045432
1	0.133608	0.131426	0.034346	0.003435	0.13575	0.053572
1.1	0.151146	0.150454	0.038457	0.003921	0.148814	0.061942
1.2	0.169816	0.168278	0.04501	0.004457	0.164771	0.070401
1.3	0.188528	0.185943	0.052194	0.005124	0.176771	0.078096
1.4	0.20815	0.205808	0.057877	0.005984	0.190122	0.085414
1.5	0.228849	0.223492	0.063531	0.007044	0.204971	0.094707
1.6	0.246432	0.242276	0.071178	0.0073	0.220911	0.103243
1.7	0.264722	0.260446	0.077252	0.008185	0.232724	0.11201
1.8	0.286678	0.279856	0.085682	0.009328	0.242093	0.121331
1.9	0.308692	0.298907	0.090291	0.00992	0.256394	0.128247
2	0.327306	0.313824	0.097819	0.011364	0.263559	0.135491
2.1	0.345457	0.333166	0.103843	0.012056	0.275465	0.144465
2.2	0.361686	0.347585	0.111659	0.012902	0.284876	0.151686
2.3	0.377571	0.366718	0.118516	0.01391	0.293947	0.160372
2.4	0.393825	0.382126	0.127366	0.014959	0.305901	0.168006
2.5	0.408564	0.397119	0.131384	0.016844	0.314477	0.176711
2.6	0.427627	0.413077	0.140995	0.017274	0.326599	0.180638
2.7	0.440712	0.427448	0.147856	0.018419	0.332912	0.188372
2.8	0.45371	0.442946	0.154522	0.019483	0.344297	0.195867
2.9	0.467493	0.456957	0.160925	0.02075	0.352324	0.202781
3	0.481808	0.466634	0.167852	0.021301	0.361586	0.209062
3.1	0.496692	0.484029	0.174292	0.02224	0.369287	0.21667
3.2	0.510859	0.496056	0.181214	0.023624	0.377027	0.22163
3.3	0.521646	0.509112	0.190564	0.024825	0.383219	0.231282
3.4	0.537108	0.520279	0.196499	0.026697	0.391704	0.237451
3.5	0.54648	0.531109	0.203822	0.02763	0.400495	0.241894
3.6	0.557887	0.541615	0.209199	0.028705	0.410033	0.248298
3.7	0.571708	0.55677	0.214852	0.029309	0.414507	0.256144
3.8	0.582054	0.563465	0.221767	0.030456	0.420419	0.260972
3.9	0.597576	0.574802	0.23022	0.032422	0.426985	0.266536
4	0.60636	0.585877	0.233094	0.033301	0.438283	0.271791
4.1	0.613874	0.59522	0.241757	0.034733	0.444371	0.278349
4.2	0.627148	0.604672	0.247646	0.035448	0.451808	0.283172
4.3	0.639748	0.614869	0.254989	0.03694	0.459636	0.287216
4.4	0.644382	0.623677	0.259453	0.038074	0.465936	0.297876
4.5	0.654171	0.63271	0.266937	0.038939	0.470445	0.301741
4.6	0.666275	0.643412	0.271405	0.040077	0.476147	0.304243
4.7	0.672667	0.650844	0.277608	0.041062	0.480314	0.312124
4.8	0.680459	0.656484	0.283405	0.041943	0.488199	0.314026
4.9	0.690465	0.665297	0.289832	0.043768	0.494938	0.321835
5	0.698679	0.67328	0.294294	0.044229	0.499911	0.324904
5.1	0.704746	0.683578	0.30208	0.044836	0.507753	0.330007
5.2	0.711843	0.693137	0.308361	0.047026	0.510221	0.335778
5.3	0.721337	0.695275	0.309637	0.048514	0.51531	0.338192
5.4	0.725445	0.707232	0.315306	0.049289	0.519709	0.344254
5.5	0.735109	0.711685	0.318984	0.050178	0.524613	0.348283
5.6	0.740383	0.718721	0.322969	0.052354	0.530668	0.350487
5.7	0.742883	0.726436	0.32959	0.051851	0.535101	0.35642
5.8	0.753919	0.733792	0.335973	0.05454	0.539639	0.361561
5.9	0.760365	0.73492	0.339961	0.055718	0.54196	0.364414
6	0.770441	0.745258	0.34288	0.056462	0.54718	0.367903
6.1	0.774906	0.753566	0.346812	0.056659	0.553767	0.372867
6.2	0.778886	0.759444	0.352597	0.057869	0.557129	0.37567
6.3	0.782888	0.758744	0.356272	0.059361	0.560593	0.38254
6.4	0.790277	0.767685	0.361054	0.060271	0.564736	0.384323
6.5	0.794568	0.771091	0.364794	0.060537	0.570499	0.388393
6.6	0.800569	0.778919	0.371851	0.062617	0.574104	0.389676
6.7	0.809924	0.782042	0.373738	0.063787	0.576946	0.39741
6.8	0.809273	0.789859	0.375641	0.065042	0.584011	0.400221
6.9	0.814643	0.786987	0.381981	0.064955	0.58584	0.402083
7	0.81979	0.797899	0.385831	0.066124	0.588828	0.405013
7.1	0.825461	0.800879	0.387639	0.067666	0.589983	0.411804
7.2	0.831867	0.804293	0.393106	0.06787	0.595727	0.411804
7.3	0.836559	0.809057	0.395785	0.069838	0.602659	0.416907
7.4	0.838481	0.818695	0.396651	0.07043	0.602401	0.417603
7.5	0.845276	0.818996	0.402243	0.071282	0.608795	0.420475
7.6	0.847709	0.824625	0.404414	0.071494	0.61084	0.426879
7.7	0.849762	0.825847	0.408828	0.073268	0.614196	0.430241
7.8	0.854317	0.831154	0.411328	0.073981	0.615251	0.433915
7.9	0.860798	0.83466	0.414351	0.075959	0.620949	0.435565
8	0.863217	0.836642	0.418116	0.078114	0.626152	0.437364
8.1	0.866598	0.842768	0.418977	0.078711	0.626641	0.442782
8.2	0.873185	0.842855	0.423423	0.079475	0.626599	0.444974
8.3	0.878939	0.848002	0.42733	0.080801	0.629597	0.444508
8.4	0.877794	0.852601	0.427835	0.081688	0.639944	0.449732
8.5	0.88341	0.852027	0.432583	0.081819	0.643237	0.452394
8.6	0.885202	0.853808	0.437373	0.082686	0.640586	0.456199
8.7	0.889459	0.858806	0.438578	0.084234	0.64427	0.458555
8.8	0.887928	0.858519	0.439378	0.085123	0.64758	0.462749
8.9	0.896198	0.868921	0.441383	0.086474	0.64539	0.464814
9	0.898295	0.869817	0.446015	0.087515	0.650489	0.466907
9.1	0.900063	0.866617	0.446539	0.087681	0.657284	0.468845
9.2	0.897424	0.87417	0.449845	0.089225	0.656174	0.472694
9.3	0.907373	0.876938	0.452151	0.091629	0.659092	0.474005
9.4	0.909233	0.882546	0.455004	0.090607	0.660659	0.476843
9.5	0.914399	0.880429	0.457489	0.091417	0.662113	0.478506
9.6	0.916032	0.884713	0.463738	0.092047	0.663372	0.480515
9.7	0.915664	0.890014	0.461049	0.093863	0.668123	0.482672
9.8	0.917649	0.890968	0.463623	0.093867	0.669482	0.48583
9.9	0.922102	0.8931	0.469336	0.094713	0.666951	0.48764
10	0.923384	0.897603	0.467815	0.095548	0.671634	0.491852
10.1	0.926563	0.897262	0.47152	0.096733	0.676979	0.493928
10.2	0.927168	0.899165	0.471931	0.097456	0.677523	0.494533
10.3	0.930921	0.895143	0.473963	0.098738	0.683194	0.494483
10.4	0.936348	0.901083	0.474711	0.098403	0.679626	0.499985
10.5	0.931448	0.899907	0.477712	0.099573	0.682192	0.501176
10.6	0.935683	0.901935	0.480594	0.100334	0.683664	0.50112
10.7	0.938021	0.905331	0.486452	0.101152	0.688532	0.504455
10.8	0.938414	0.909148	0.483813	0.102198	0.690128	0.50534
10.9	0.943328	0.914748	0.484846	0.102451	0.689149	0.509074
11	0.941643	0.914495	0.48416	0.103274	0.688154	0.510963
11.1	0.94595	0.911883	0.489263	0.103413	0.693469	0.511449
11.2	0.945811	0.910181	0.48966	0.103351	0.694199	0.513856
11.3	0.94856	0.918403	0.492542	0.105456	0.694068	0.514747
11.4	0.952028	0.921017	0.489538	0.107365	0.696472	0.51936
11.5	0.953836	0.921961	0.491545	0.10758	0.698245	0.521453
11.6	0.957616	0.917821	0.494523	0.107943	0.699599	0.520821
11.7	0.956313	0.923251	0.49653	0.106748	0.701544	0.52473
11.8	0.957946	0.923735	0.501326	0.108267	0.702772	0.522305
11.9	0.957892	0.931584	0.496278	0.109832	0.705224	0.523732
12	0.959335	0.92988	0.498539	0.109622	0.70576	0.527186
12.1	0.960182	0.93031	0.50097	0.109878	0.710434	0.531406
12.2	0.963054	0.930295	0.502595	0.111166	0.708632	0.532813
12.3	0.962269	0.93309	0.501831	0.112461	0.706278	0.528765
12.4	0.966032	0.932514	0.503632	0.111563	0.708919	0.535437
12.5	0.967518	0.93426	0.505513	0.113128	0.711739	0.535574
12.6	0.966032	0.936803	0.504891	0.113795	0.714037	0.536884
12.7	0.970233	0.93224	0.506843	0.114158	0.712732	0.534523
12.8	0.971227	0.936005	0.50806	0.114896	0.715026	0.5362
12.9	0.969726	0.937556	0.506207	0.11649	0.71854	0.539286
13	0.97451	0.940018	0.509052	0.11526	0.717054	0.539336
13.1	0.972708	0.93959	0.509162	0.114992	0.718199	0.54501
13.2	0.974518	0.939623	0.510431	0.117558	0.717632	0.544622
13.3	0.97205	0.94423	0.512333	0.117834	0.720576	0.54515
13.4	0.973853	0.941229	0.511641	0.118559	0.721788	0.545783
13.5	0.972839	0.946281	0.514224	0.119166	0.722891	0.546621
13.6	0.97712	0.947999	0.515869	0.120222	0.72099	0.548489
13.7	0.976334	0.947825	0.51963	0.119914	0.721052	0.549983
13.8	0.978984	0.942987	0.515084	0.122634	0.726064	0.550401
13.9	0.981866	0.948511	0.515585	0.121232	0.721705	0.553648
14	0.974346	0.945464	0.518641	0.121358	0.728408	0.555269
14.1	0.984112	0.952164	0.517361	0.123808	0.727317	0.552248
14.2	0.978541	0.942975	0.517598	0.122728	0.729532	0.555201
14.3	0.984415	0.950659	0.518837	0.12466	0.727269	0.559346
14.4	0.979439	0.952824	0.519857	0.124899	0.727213	0.558604
14.5	0.985076	0.949205	0.519689	0.124989	0.728986	0.561412
14.6	0.983971	0.952066	0.518502	0.125749	0.734659	0.559255
14.7	0.988432	0.94897	0.521781	0.124016	0.733073	0.559785
14.8	0.985697	0.948756	0.521249	0.125998	0.729356	0.558735
14.9	0.986244	0.955204	0.52352	0.124384	0.734033	0.563899
15	0.99285	0.961323	0.520547	0.127285	0.735265	0.566409
15.1	0.988584	0.951654	0.525023	0.128515	0.734328	0.563924
15.2	0.988719	0.957938	0.52347	0.129244	0.736861	0.569973
15.3	0.988201	0.957298	0.52379	0.128577	0.733669	0.565011
15.4	0.991717	0.955563	0.524773	0.130395	0.73709	0.568055
15.5	0.99279	0.95522	0.523096	0.129402	0.737485	0.568396
15.6	0.990086	0.960727	0.526824	0.13089	0.7357	0.56978
15.7	0.992266	0.956581	0.52654	0.131638	0.73608	0.568776
15.8	0.989282	0.962136	0.5257	0.130655	0.738667	0.573148
15.9	0.992725	0.960384	0.529243	0.132128	0.737048	0.57332
16	0.989506	0.964214	0.528738	0.131873	0.737002	0.573782
16.1	0.989741	0.963916	0.526847	0.132249	0.739319	0.57492
16.2	0.988164	0.959478	0.527645	0.132991	0.739078	0.576273
16.3	0.993307	0.963904	0.524923	0.132683	0.741564	0.57593
16.4	0.99178	0.964596	0.527375	0.134034	0.738584	0.578046
16.5	0.988748	0.963075	0.531281	0.133604	0.742883	0.578619
16.6	0.993689	0.964035	0.52783	0.134078	0.741449	0.577767
16.7	0.994662	0.964128	0.529272	0.133849	0.741817	0.58121
16.8	0.993392	0.964538	0.530556	0.134875	0.744242	0.577913
16.9	0.99307	0.964	0.534714	0.135227	0.741667	0.580097
17	0.991875	0.965893	0.530573	0.136482	0.740612	0.583733
17.1	0.99669	0.968417	0.531851	0.136037	0.744838	0.581846
17.2	0.99776	0.963551	0.531712	0.135937	0.746896	0.581445
17.3	0.99381	0.963912	0.531982	0.135362	0.746226	0.583259
17.4	0.996979	0.966855	0.530267	0.136153	0.746382	0.586644
17.5	0.995643	0.96476	0.534384	0.137533	0.747737	0.584201
17.6	0.995173	0.961874	0.532551	0.136793	0.745726	0.586478
17.7	0.996864	0.965302	0.532724	0.13804	0.747259	0.586644
17.8	0.996748	0.967688	0.532802	0.138308	0.750482	0.586322
17.9	0.992544	0.966809	0.530452	0.138605	0.745923	0.587897
18	0.992891	0.969346	0.532217	0.138965	0.745888	0.590106
18.1	0.993419	0.973957	0.532576	0.138878	0.743995	0.588471
18.2	0.995634	0.966892	0.533557	0.141003	0.749624	0.590495
18.3	0.996145	0.968908	0.533457	0.140347	0.745539	0.590031
18.4	0.993652	0.966339	0.531606	0.139906	0.751723	0.595012
18.5	0.993332	0.967264	0.53136	0.139773	0.746486	0.590946
18.6	0.995181	0.969747	0.534567	0.140785	0.749882	0.592554
18.7	0.999921	0.969868	0.533291	0.141641	0.747002	0.58979
18.8	0.994907	0.971865	0.534573	0.140885	0.748097	0.594869
18.9	0.997351	0.970096	0.536372	0.142229	0.745574	0.594312
19	0.997652	0.96647	0.538234	0.142366	0.750428	0.594038
19.1	0.994685	0.966859	0.535512	0.141143	0.749526	0.595594
19.2	0.992758	0.971345	0.532622	0.142113	0.749204	0.597148
19.3	0.993828	0.965302	0.535477	0.142564	0.750667	0.597046
19.4	0.998269	0.965972	0.535321	0.144663	0.751694	0.598673
19.5	0.990919	0.967297	0.533823	0.144353	0.750993	0.598297
19.6	0.993529	0.972033	0.536694	0.143447	0.749765	0.597807
19.7	0.994797	0.968764	0.532057	0.142973	0.7517	0.599164
19.8	0.995264	0.968712	0.536021	0.144825	0.753749	0.600726
19.9	0.993053	0.972347	0.536805	0.144631	0.748402	0.598522
20	0.991551	0.9693	0.532489	0.145411	0.748444	0.601755
20.1	0.996362	0.968623	0.530814	0.145859	0.749293	0.601028
20.2	0.994304	0.965502	0.530317	0.145153	0.74962	0.601221
20.3	0.99797	0.967179	0.537174	0.145425	0.751224	0.60285
20.4	0.994697	0.966823	0.532884	0.145182	0.752539	0.599958
20.5	0.993014	0.969901	0.537012	0.147119	0.74989	0.603899
20.6	0.997646	0.973215	0.534299	0.147277	0.750941	0.604296
20.7	1	0.972783	0.537337	0.147752	0.750902	0.599492
20.8	0.993292	0.970314	0.5336	0.146718	0.749695	0.600116
20.9	0.989488	0.969192	0.535325	0.148224	0.751301	0.604891
21	0.993344	0.968569	0.534592	0.147011	0.754522	0.603966
21.1	0.995655	0.970279	0.53232	0.148482	0.752134	0.604454
21.2	0.998001	0.96672	0.532478	0.146657	0.750646	0.603848
21.3	0.996035	0.968814	0.534307	0.147713	0.749084	0.602063
21.4	0.993733	0.968191	0.533524	0.148482	0.747899	0.601815
21.5	0.991719	0.9677	0.532358	0.148363	0.748026	0.605944
21.6	0.995422	0.974067	0.533808	0.148214	0.749192	0.604992
21.7	0.990101	0.966323	0.534851	0.147653	0.750121	0.608473
21.8	0.99413	0.965795	0.533939	0.147788	0.747974	0.604018
21.9	0.99313	0.966329	0.53284	0.148827	0.749009	0.605977
22	0.992376	0.964197	0.532987	0.148943	0.749936	0.60738
22.1	0.988632	0.965452	0.537083	0.148016	0.746821	0.607652
22.2	0.989776	0.966801	0.536229	0.149319	0.74771	0.60941
22.3	0.993766	0.966252	0.531736	0.147892	0.748708	0.609828
22.4	0.994032	0.969036	0.531649	0.152237	0.749782	0.609867
22.5	0.987981	0.973872	0.536728	0.149841	0.748504	0.606466
22.6	0.990926	0.973938	0.534648	0.150527	0.749553	0.610198
22.7	0.994219	0.966605	0.532345	0.151823	0.748151	0.610547
22.8	0.991248	0.970882	0.531797	0.150811	0.75075	0.610607
22.9	0.994919	0.97233	0.534321	0.151162	0.74745	0.617327
23	0.994298	0.971948	0.533222	0.152014	0.746449	0.623172
23.1	0.992391	0.967343	0.531194	0.152314	0.745983	0.618817
23.2	0.989242	0.970585	0.535998	0.151804	0.746476	0.619033
23.3	0.991892	0.965959	0.534457	0.153261	0.745169	0.622591
23.4	0.991724	0.971385	0.534064	0.152102	0.74739	0.622963
23.5	0.990269	0.968613	0.533064	0.152858	0.749711	0.622574
23.6	0.985903	0.965093	0.53182	0.15169	0.747521	0.625119
23.7	0.9897	0.966857	0.532397	0.152765	0.747014	0.625523
23.8	0.989093	0.967642	0.528761	0.152544	0.745977	0.622728
23.9	0.990121	0.963081	0.533875	0.152382	0.745763	0.626227
24	0.985789	0.970117	0.530114	0.15372	0.741025	0.624363
24.1	0.98757	0.96513	0.528362	0.153961	0.745212	0.622965
24.2	0.989205	0.966587	0.531342	0.15265	0.746378	0.625976
24.3	0.984661	0.967746	0.529779	0.15344	0.747932	0.624862
24.4	0.984696	0.96704	0.53236	0.153517	0.747733	0.630335
24.5	0.982932	0.965329	0.529307	0.153837	0.744277	0.626474
24.6	0.987723	0.96637	0.529781	0.154175	0.747835	0.625196
24.7	0.988102	0.964095	0.527288	0.15473	0.747883	0.630389
24.8	0.98283	0.968365	0.529927	0.15243	0.74601	0.627692
24.9	0.983896	0.960802	0.529889	0.154142	0.743681	0.626996
25	0.983175	0.965832	0.527574	0.155171	0.743469	0.62775
25.1	0.982105	0.960214	0.525673	0.154252	0.745054	0.627447
25.2	0.978786	0.957836	0.526276	0.15482	0.741032	0.628785
25.3	0.979977	0.960484	0.529746	0.154371	0.743851	0.632812
25.4	0.978439	0.961577	0.524472	0.155144	0.74536	0.627989
25.5	0.982425	0.961402	0.528252	0.154537	0.746152	0.628039
25.6	0.978468	0.961641	0.528482	0.156235	0.744354	0.630568
25.7	0.979468	0.959064	0.529274	0.15579	0.741079	0.628756
25.8	0.979607	0.957105	0.529488	0.154992	0.745241	0.629691
25.9	0.977718	0.959227	0.525565	0.156619	0.745075	0.628457
26	0.978653	0.958528	0.5299	0.156551	0.74311	0.628299
26.1	0.980353	0.95639	0.525297	0.155595	0.739363	0.626339
26.2	0.980852	0.95884	0.52538	0.156555	0.740171	0.630215
26.3	0.975486	0.953346	0.525991	0.156166	0.742642	0.625169
26.4	0.977851	0.956592	0.527225	0.156677	0.739758	0.628189
26.5	0.97537	0.956912	0.525459	0.156991	0.741173	0.62848
26.6	0.977263	0.954476	0.525721	0.15835	0.739754	0.631746
26.7	0.971605	0.95691	0.524223	0.158836	0.740144	0.631626
26.8	0.972066	0.952583	0.523082	0.156619	0.739126	0.628324
26.9	0.974244	0.954805	0.522774	0.158813	0.741275	0.629392
27	0.97554	0.950179	0.524042	0.157897	0.736845	0.628698
27.1	0.971582	0.95223	0.523256	0.157999	0.738708	0.629635
27.2	0.971981	0.948887	0.523512	0.157552	0.737707	0.631765
27.3	0.97372	0.950724	0.523375	0.157218	0.741439	0.631673
27.4	0.971358	0.951665	0.521372	0.159302	0.740926	0.628471
27.5	0.972216	0.949531	0.523049	0.158437	0.740313	0.628552
27.6	0.968752	0.950591	0.522365	0.158894	0.735101	0.628453
27.7	0.971499	0.947285	0.523076	0.16026	0.74046	0.629687
27.8	0.966181	0.952814	0.520462	0.160445	0.735616	0.631376
27.9	0.96226	0.950285	0.522928	0.159306	0.738875	0.626456
28	0.968548	0.94678	0.518082	0.158142	0.735446	0.629462
28.1	0.964652	0.947465	0.523657	0.159892	0.735261	0.629469
28.2	0.963328	0.946935	0.52132	0.160264	0.73635	0.63021
28.3	0.967249	0.949493	0.521355	0.158211	0.737742	0.630859
28.4	0.960887	0.943968	0.521368	0.159052	0.73422	0.628752
28.5	0.9646	0.945342	0.520366	0.159545	0.736026	0.630666
28.6	0.962167	0.94295	0.524472	0.160517	0.734989	0.629473
28.7	0.962244	0.945404	0.520401	0.159025	0.736641	0.630337
28.8	0.964076	0.946989	0.521455	0.159441	0.733663	0.630487
28.9	0.961741	0.947914	0.519223	0.160929	0.732603	0.630246
29	0.963551	0.944195	0.520042	0.16074	0.734222	0.629915
29.1	0.95932	0.943274	0.518076	0.161216	0.734395	0.628184
29.2	0.962526	0.942017	0.520225	0.160526	0.732329	0.630171
29.3	0.960112	0.944282	0.516867	0.161178	0.733987	0.628735
29.4	0.958626	0.944554	0.521627	0.161727	0.731165	0.633236
29.5	0.957795	0.940812	0.518643	0.160679	0.735874	0.629442
29.6	0.960153	0.938996	0.51867	0.160947	0.731045	0.630611
29.7	0.960193	0.941292	0.516977	0.16063	0.732225	0.628924
29.8	0.96092	0.942852	0.515061	0.160488	0.726388	0.626497
29.9	0.958505	0.939411	0.516036	0.160937	0.726243	0.631393
30	0.955077	0.938572	0.518926	0.160193	0.730607	0.630248
30.1	0.95154	0.939297	0.516457	0.15985	0.730099	0.628519
30.2	0.953527	0.936255	0.516734	0.162032	0.729179	0.62614
30.3	0.955305	0.940764	0.51622	0.162078	0.728096	0.625471
30.4	0.94902	0.93713	0.517147	0.162498	0.731691	0.63148

## Sheet: primary data n=2
	PCP-pep86		PCP-DHFR-pep86		PCP-pep86-DHFR
time	-MTX	+MTX	-MTX	+MTX	-MTX	+MTX
0	0.003455	0.003436	0.003719	0.001765	0.00537	0.002138
0.1	0.007026	0.007543	0.004739	0.001781	0.009593	0.004013
0.2	0.012549	0.014393	0.006344	0.002148	0.015501	0.007213
0.3	0.02011	0.024354	0.00899	0.0023	0.022718	0.011684
0.4	0.029884	0.036704	0.011453	0.002484	0.031128	0.017565
0.5	0.040969	0.049165	0.014505	0.002726	0.04025	0.024424
0.6	0.052888	0.065521	0.018257	0.003174	0.050366	0.032766
0.7	0.065557	0.08058	0.022278	0.003418	0.060453	0.041301
0.8	0.079112	0.099103	0.026873	0.004322	0.071803	0.048422
0.9	0.093499	0.116915	0.032253	0.00465	0.081602	0.057392
1	0.107513	0.135685	0.036928	0.005316	0.092642	0.067787
1.1	0.123364	0.15327	0.042624	0.005741	0.104052	0.075869
1.2	0.137084	0.1721	0.047481	0.006335	0.113291	0.084509
1.3	0.15302	0.192513	0.054499	0.007349	0.122933	0.094154
1.4	0.168533	0.210375	0.060688	0.008062	0.134278	0.103572
1.5	0.18177	0.231788	0.067436	0.008589	0.144237	0.112589
1.6	0.196943	0.251122	0.073226	0.009717	0.155353	0.120258
1.7	0.212329	0.268569	0.08015	0.01047	0.163977	0.131581
1.8	0.228384	0.287636	0.088228	0.011337	0.174103	0.136233
1.9	0.241441	0.305258	0.093747	0.012374	0.185328	0.146298
2	0.255965	0.323069	0.101634	0.013337	0.193205	0.155052
2.1	0.268396	0.337813	0.109014	0.014204	0.202755	0.162254
2.2	0.28367	0.354702	0.112359	0.015507	0.212859	0.170446
2.3	0.297439	0.374419	0.120534	0.015739	0.222077	0.179483
2.4	0.311679	0.389474	0.129012	0.017467	0.231869	0.185365
2.5	0.323452	0.404756	0.135693	0.018567	0.239788	0.194145
2.6	0.338352	0.419266	0.140886	0.019407	0.247624	0.19996
2.7	0.350997	0.432639	0.151241	0.020924	0.253227	0.207323
2.8	0.362941	0.4462	0.156037	0.021938	0.264108	0.215682
2.9	0.373625	0.460485	0.163596	0.022604	0.269063	0.222663
3	0.384716	0.475489	0.170383	0.023599	0.276891	0.229575
3.1	0.39873	0.487791	0.177881	0.024882	0.28538	0.235949
3.2	0.410278	0.501266	0.183616	0.026231	0.293623	0.24193
3.3	0.421155	0.525326	0.190723	0.026922	0.299804	0.249068
3.4	0.429994	0.538088	0.198697	0.027966	0.307052	0.254296
3.5	0.446645	0.550075	0.205271	0.029694	0.313098	0.260892
3.6	0.454286	0.561164	0.213919	0.030494	0.321107	0.265173
3.7	0.465405	0.569517	0.218372	0.03181	0.32753	0.273102
3.8	0.476944	0.585903	0.225882	0.032697	0.333631	0.281207
3.9	0.485086	0.597369	0.231708	0.033709	0.342005	0.28422
4	0.495975	0.608837	0.240029	0.03491	0.345987	0.291702
4.1	0.503357	0.620253	0.246403	0.037007	0.353658	0.294845
4.2	0.513703	0.630025	0.252093	0.037962	0.360007	0.300891
4.3	0.525446	0.641799	0.257907	0.038945	0.36675	0.303377
4.4	0.531056	0.651465	0.266327	0.039462	0.371601	0.309706
4.5	0.536675	0.660227	0.271105	0.041679	0.37667	0.318462
4.6	0.549658	0.66984	0.275454	0.043627	0.382025	0.320677
4.7	0.558194	0.6737	0.281095	0.044597	0.390752	0.326135
4.8	0.566382	0.686794	0.290655	0.045295	0.392419	0.332955
4.9	0.573106	0.692922	0.294625	0.046793	0.396902	0.338556
5	0.578584	0.702584	0.298955	0.047548	0.402529	0.341406
5.1	0.584289	0.712464	0.303436	0.04852	0.409085	0.347171
5.2	0.593277	0.720564	0.308815	0.049464	0.413142	0.349441
5.3	0.597375	0.724204	0.31515	0.051353	0.419929	0.353998
5.4	0.606217	0.732828	0.321331	0.052388	0.422034	0.361316
5.5	0.614576	0.742938	0.326312	0.054057	0.428753	0.365773
5.6	0.620479	0.747187	0.330714	0.056105	0.43279	0.369942
5.7	0.628794	0.755717	0.336681	0.056457	0.437042	0.372359
5.8	0.639891	0.764847	0.34061	0.057351	0.445676	0.37769
5.9	0.650522	0.766806	0.347691	0.058304	0.447456	0.38151
6	0.657692	0.774843	0.349851	0.060091	0.454225	0.385329
6.1	0.661491	0.779937	0.355738	0.060616	0.454805	0.390838
6.2	0.669756	0.787231	0.35984	0.061695	0.462698	0.392804
6.3	0.673254	0.794476	0.363287	0.062512	0.467346	0.397395
6.4	0.679296	0.796858	0.368985	0.064393	0.470067	0.405074
6.5	0.679897	0.800806	0.373826	0.065421	0.473608	0.406809
6.6	0.685243	0.806396	0.378177	0.066241	0.4767	0.413425
6.7	0.689992	0.812839	0.382591	0.068188	0.48167	0.415208
6.8	0.695939	0.815887	0.388578	0.07017	0.483532	0.420094
6.9	0.704351	0.823379	0.393055	0.070195	0.490108	0.422385
7	0.708697	0.829376	0.39413	0.072681	0.491148	0.426572
7.1	0.710794	0.832719	0.399972	0.072121	0.49638	0.428411
7.2	0.717722	0.834181	0.40404	0.073391	0.501749	0.434078
7.3	0.719603	0.846168	0.408861	0.074798	0.503099	0.435664
7.4	0.725395	0.847864	0.411391	0.076005	0.510395	0.441098
7.5	0.728946	0.847583	0.414423	0.076911	0.513096	0.442177
7.6	0.734141	0.855807	0.418337	0.078055	0.513276	0.446466
7.7	0.737875	0.858039	0.425275	0.077921	0.518626	0.445493
7.8	0.740364	0.860486	0.424504	0.079747	0.52374	0.454933
7.9	0.745709	0.869323	0.427224	0.080246	0.52843	0.454168
8	0.746908	0.867719	0.43405	0.08275	0.526751	0.457922
8.1	0.752349	0.870441	0.438362	0.083804	0.52879	0.460141
8.2	0.755702	0.874227	0.43837	0.084824	0.534171	0.46783
8.3	0.757447	0.882698	0.446869	0.085003	0.538607	0.464917
8.4	0.764811	0.882283	0.445479	0.08649	0.537864	0.468048
8.5	0.768369	0.887385	0.450033	0.086544	0.541689	0.472588
8.6	0.771246	0.887538	0.457002	0.087915	0.548841	0.475648
8.7	0.774029	0.892041	0.457356	0.088664	0.54664	0.478866
8.8	0.778609	0.895925	0.459642	0.091023	0.555783	0.482726
8.9	0.780769	0.896996	0.461802	0.090372	0.552432	0.483198
9	0.784631	0.901949	0.465503	0.092035	0.557178	0.484648
9.1	0.78936	0.904697	0.468819	0.092253	0.562603	0.489312
9.2	0.786343	0.906458	0.470043	0.092856	0.562251	0.491281
9.3	0.792355	0.913242	0.471645	0.093684	0.563752	0.493125
9.4	0.79672	0.912155	0.477305	0.095763	0.567774	0.49797
9.5	0.80262	0.914828	0.479558	0.096261	0.57014	0.496014
9.6	0.798713	0.916092	0.479518	0.099647	0.570944	0.501187
9.7	0.798796	0.920772	0.484843	0.098529	0.574539	0.502077
9.8	0.807066	0.922617	0.485531	0.100478	0.581488	0.50274
9.9	0.807447	0.92169	0.489868	0.099745	0.578466	0.507879
10	0.810757	0.92793	0.490546	0.101135	0.580313	0.508542
10.1	0.815653	0.930951	0.495491	0.103092	0.585455	0.510914
10.2	0.815111	0.92847	0.498394	0.103906	0.587528	0.517256
10.3	0.815818	0.932338	0.496726	0.10343	0.587355	0.515468
10.4	0.817449	0.931947	0.50046	0.104625	0.594676	0.518487
10.5	0.820372	0.936145	0.502079	0.105606	0.595042	0.520617
10.6	0.824087	0.935868	0.504045	0.10696	0.593969	0.523455
10.7	0.828428	0.942403	0.505706	0.105952	0.595176	0.523432
10.8	0.826284	0.947213	0.513719	0.10809	0.600427	0.528074
10.9	0.830376	0.948107	0.511781	0.108232	0.603865	0.526183
11	0.832265	0.949029	0.512986	0.109315	0.604175	0.529259
11.1	0.833908	0.950334	0.511576	0.110254	0.606644	0.533227
11.2	0.835954	0.955021	0.515967	0.109997	0.609606	0.532964
11.3	0.834089	0.956554	0.51639	0.111493	0.608926	0.536901
11.4	0.839311	0.955426	0.52264	0.112202	0.612646	0.535757
11.5	0.848236	0.954377	0.520678	0.113	0.616972	0.539955
11.6	0.841805	0.957506	0.525385	0.113975	0.614924	0.538902
11.7	0.844454	0.958805	0.52344	0.114462	0.617796	0.545014
11.8	0.843994	0.957679	0.524234	0.11608	0.620054	0.541852
11.9	0.850539	0.96246	0.530224	0.114883	0.620192	0.542135
12	0.847129	0.961814	0.532431	0.116996	0.623704	0.551117
12.1	0.850598	0.967307	0.530173	0.116538	0.625148	0.55072
12.2	0.852925	0.96725	0.53272	0.116538	0.624594	0.551046
12.3	0.854714	0.965422	0.53401	0.118629	0.626381	0.553961
12.4	0.85503	0.968575	0.535173	0.119653	0.627872	0.55352
12.5	0.857833	0.970377	0.538379	0.120451	0.630661	0.556528
12.6	0.85878	0.970131	0.538886	0.121269	0.626306	0.560582
12.7	0.860644	0.969294	0.540287	0.121275	0.631725	0.557591
12.8	0.861683	0.969931	0.541726	0.121713	0.632397	0.561221
12.9	0.858126	0.971814	0.54368	0.122684	0.63458	0.562797
13	0.859248	0.973056	0.54526	0.123751	0.63495	0.562078
13.1	0.865011	0.975576	0.544955	0.124677	0.637179	0.564765
13.2	0.871111	0.973938	0.545376	0.124653	0.638083	0.568664
13.3	0.86802	0.982404	0.548228	0.125025	0.638843	0.570895
13.4	0.866593	0.974471	0.548524	0.125868	0.641546	0.571082
13.5	0.8671	0.978164	0.54968	0.126143	0.645966	0.570398
13.6	0.873128	0.981525	0.546618	0.127116	0.643496	0.56971
13.7	0.87246	0.980373	0.550631	0.127393	0.646106	0.574843
13.8	0.869867	0.977596	0.551394	0.128507	0.643069	0.575327
13.9	0.870569	0.978654	0.556561	0.129685	0.646524	0.575132
14	0.87594	0.98217	0.554501	0.128763	0.646766	0.578564
14.1	0.878385	0.980605	0.558369	0.129201	0.646361	0.579731
14.2	0.877073	0.983777	0.560024	0.130461	0.65347	0.580651
14.3	0.881229	0.983331	0.561508	0.130923	0.651819	0.580514
14.4	0.878132	0.987217	0.5613	0.130575	0.655202	0.582713
14.5	0.877623	0.983738	0.561131	0.130577	0.652886	0.586137
14.6	0.876355	0.984654	0.561034	0.131493	0.657631	0.583454
14.7	0.88165	0.98406	0.564077	0.134235	0.655449	0.587326
14.8	0.884559	0.989176	0.565004	0.133553	0.655658	0.587155
14.9	0.883191	0.989442	0.561726	0.13292	0.660571	0.586215
15	0.882749	0.990348	0.565647	0.134917	0.661346	0.586107
15.1	0.885754	0.989501	0.569806	0.134901	0.658653	0.592045
15.2	0.885086	0.988699	0.565861	0.134777	0.66122	0.589057
15.3	0.885673	0.990841	0.570665	0.136098	0.662063	0.593407
15.4	0.882216	0.989986	0.569676	0.137692	0.661477	0.593081
15.5	0.888397	0.99275	0.573363	0.136628	0.661328	0.593214
15.6	0.886609	0.989835	0.567844	0.137145	0.66472	0.596353
15.7	0.885386	0.990513	0.568595	0.138138	0.66471	0.597357
15.8	0.887806	0.992231	0.571705	0.137491	0.668916	0.592953
15.9	0.891888	0.99272	0.568721	0.138944	0.669404	0.595557
16	0.888867	0.993703	0.573613	0.139329	0.670218	0.599993
16.1	0.890628	0.990554	0.573566	0.139026	0.666878	0.598307
16.2	0.887794	0.993196	0.575215	0.140597	0.66802	0.599441
16.3	0.892786	0.994532	0.575779	0.140412	0.66914	0.601198
16.4	0.891652	0.995096	0.573383	0.140585	0.670082	0.605925
16.5	0.888297	0.988361	0.575547	0.141017	0.671479	0.600032
16.6	0.892389	0.993795	0.578713	0.142672	0.672558	0.604122
16.7	0.894496	0.992844	0.574444	0.141434	0.669787	0.607112
16.8	0.896538	0.993133	0.578804	0.142833	0.670652	0.60639
16.9	0.891929	0.993298	0.58058	0.144309	0.669828	0.608476
17	0.895233	0.997024	0.577233	0.145003	0.673343	0.605838
17.1	0.892214	0.995202	0.579509	0.144252	0.672814	0.611005
17.2	0.890365	0.994424	0.579853	0.145206	0.678413	0.612104
17.3	0.898132	0.996448	0.579678	0.147505	0.677383	0.607699
17.4	0.896739	0.995051	0.578979	0.145565	0.679133	0.612198
17.5	0.896076	0.99589	0.581746	0.145565	0.67601	0.612768
17.6	0.897281	0.993384	0.583428	0.146192	0.679946	0.611113
17.7	0.89734	0.992282	0.582664	0.147904	0.678301	0.614918
17.8	0.900202	0.999534	0.580665	0.147169	0.680051	0.61655
17.9	0.895642	0.994876	0.58414	0.148537	0.681878	0.615072
18	0.898338	0.993797	0.582733	0.147161	0.681346	0.614321
18.1	0.899689	0.996669	0.587304	0.14845	0.679764	0.614969
18.2	0.900265	0.999	0.584281	0.148101	0.680461	0.615313
18.3	0.90019	0.99886	0.585803	0.150023	0.680359	0.619789
18.4	0.899781	0.996128	0.58561	0.150086	0.682531	0.619405
18.5	0.89678	0.997022	0.585661	0.149205	0.682429	0.618065
18.6	0.902741	0.994843	0.589816	0.152342	0.684133	0.616968
18.7	0.901198	0.997854	0.586449	0.15061	0.686259	0.619765
18.8	0.901306	0.994707	0.588263	0.151648	0.690978	0.623264
18.9	0.901984	0.997522	0.587827	0.150872	0.685143	0.618368
19	0.902482	0.998715	0.58754	0.151357	0.688628	0.624734
19.1	0.901542	0.995739	0.587654	0.153421	0.688962	0.622124
19.2	0.902975	0.996873	0.591923	0.151118	0.687158	0.622788
19.3	0.900929	0.999994	0.590987	0.151739	0.68485	0.621911
19.4	0.905601	0.995238	0.58745	0.153346	0.685953	0.623981
19.5	0.904406	1	0.591088	0.155186	0.689009	0.624563
19.6	0.902476	0.993941	0.587029	0.15441	0.688162	0.623468
19.7	0.903712	0.997246	0.589264	0.152745	0.687895	0.626825
19.8	0.90646	0.996411	0.589293	0.155581	0.687022	0.628087
19.9	0.915449	0.997838	0.59002	0.154746	0.687824	0.625382
20	0.916466	0.995033	0.589822	0.156489	0.687596	0.629451
20.1	0.91304	0.99736	0.593395	0.155899	0.688113	0.632474
20.2	0.918264	0.994839	0.58979	0.155377	0.688952	0.631597
20.3	0.915029	0.992543	0.590928	0.157922	0.690821	0.629659
20.4	0.917739	0.996116	0.590919	0.155233	0.688093	0.630125
20.5	0.919583	0.997628	0.590372	0.157955	0.688368	0.633602
20.6	0.916131	0.996588	0.591198	0.157902	0.688877	0.632474
20.7	0.916548	0.992657	0.590022	0.159105	0.691063	0.632232
20.8	0.918056	0.992985	0.58926	0.157564	0.690428	0.631485
20.9	0.91721	0.99691	0.591603	0.157753	0.689386	0.631939
21	0.917248	0.996987	0.590484	0.158908	0.693561	0.633191
21.1	0.917808	0.995957	0.590757	0.158525	0.691525	0.634356
21.2	0.921061	0.994835	0.592114	0.157837	0.688256	0.632983
21.3	0.919042	0.995678	0.590115	0.159549	0.691242	0.634962
21.4	0.918492	0.995371	0.591422	0.158588	0.692006	0.636862
21.5	0.918154	0.994116	0.591972	0.159842	0.695627	0.633796
21.6	0.918095	0.991185	0.592412	0.160386	0.693657	0.634537
21.7	0.91839	0.995542	0.594608	0.15961	0.691688	0.634708
21.8	0.922773	0.993612	0.593358	0.159663	0.692435	0.635141
21.9	0.918614	0.992366	0.592658	0.161	0.694211	0.634742
22	0.91839	0.993697	0.593399	0.161192	0.695302	0.638631
22.1	0.916499	0.991427	0.589059	0.161558	0.692698	0.639201
22.2	0.916515	0.99683	0.595239	0.160968	0.692244	0.637295
22.3	0.918219	0.99225	0.592222	0.161864	0.693575	0.637961
22.4	0.921151	0.989084	0.592347	0.162678	0.697785	0.636642
22.5	0.917495	0.995419	0.594226	0.161454	0.695379	0.639787
22.6	0.918293	0.994064	0.593745	0.161149	0.692197	0.638101
22.7	0.915646	0.989748	0.595225	0.164009	0.690827	0.640807
22.8	0.917187	0.991417	0.595698	0.162922	0.694066	0.63473
22.9	0.921308	0.990141	0.590185	0.163335	0.691077	0.638521
23	0.919797	0.990114	0.591475	0.16359	0.693655	0.640492
23.1	0.922995	0.988017	0.591929	0.163069	0.700047	0.642574
23.2	0.920066	0.989106	0.594016	0.164097	0.693237	0.64107
23.3	0.918468	0.990405	0.590832	0.163726	0.696562	0.641514
23.4	0.914284	0.992213	0.594616	0.1651	0.693685	0.640941
23.5	0.919911	0.989084	0.590551	0.164901	0.696297	0.640154
23.6	0.918614	0.988681	0.593519	0.16439	0.694137	0.638781
23.7	0.91655	0.989135	0.593428	0.164522	0.694897	0.64358
23.8	0.918026	0.987891	0.594482	0.165939	0.693824	0.641868
23.9	0.916923	0.988524	0.593346	0.167128	0.695729	0.640819
24	0.920941	0.984795	0.591441	0.16623	0.699493	0.638364
24.1	0.919327	0.98543	0.592788	0.166186	0.696981	0.641809
24.2	0.919186	0.988913	0.593652	0.164642	0.693777	0.642935
24.3	0.919502	0.989656	0.592972	0.166055	0.698773	0.645585
24.4	0.917991	0.98797	0.590698	0.165721	0.692704	0.642271
24.5	0.918716	0.984733	0.592226	0.16778	0.695033	0.643865
24.6	0.921639	0.986906	0.594678	0.168592	0.699015	0.641621
24.7	0.918071	0.984862	0.592518	0.168111	0.700408	0.644085
24.8	0.918097	0.986478	0.593572	0.167507	0.698537	0.646389
24.9	0.919095	0.984713	0.595842	0.167493	0.694211	0.643163
25	0.916851	0.985458	0.59583	0.16688	0.698645	0.644604
25.1	0.916835	0.984322	0.596418	0.167692	0.695687	0.641658
25.2	0.919412	0.988695	0.588778	0.168608	0.695338	0.644866
25.3	0.920705	0.983595	0.591158	0.169276	0.693911	0.642965
25.4	0.916228	0.9808	0.595415	0.166566	0.697513	0.645084
25.5	0.919009	0.980802	0.593715	0.167993	0.696977	0.646112
25.6	0.91713	0.978198	0.593994	0.169695	0.696937	0.647145
25.7	0.917116	0.979127	0.593006	0.169025	0.696242	0.643171
25.8	0.91573	0.979697	0.593214	0.169707	0.695701	0.645074
25.9	0.917407	0.982698	0.595337	0.169881	0.695102	0.645231
26	0.918227	0.979736	0.594183	0.170322	0.697419	0.644248
26.1	0.91508	0.97704	0.591994	0.170324	0.695385	0.645595
26.2	0.918445	0.976533	0.598026	0.171507	0.697486	0.642725
26.3	0.915416	0.977643	0.594948	0.170176	0.69407	0.647305
26.4	0.915408	0.977584	0.596481	0.170088	0.698891	0.644229
26.5	0.91871	0.981987	0.596286	0.169325	0.693881	0.646336
26.6	0.911617	0.975623	0.596762	0.169657	0.696945	0.641803
26.7	0.911491	0.973797	0.594991	0.171664	0.695369	0.647501
26.8	0.914054	0.974351	0.593871	0.17033	0.695393	0.64747
26.9	0.914254	0.975584	0.5929	0.169876	0.697321	0.647686
27	0.915357	0.977323	0.59175	0.172146	0.698353	0.645451
27.1	0.912336	0.975912	0.59606	0.171931	0.696711	0.646448
27.2	0.91168	0.973716	0.592265	0.170159	0.696468	0.645705
27.3	0.913437	0.976668	0.594091	0.171159	0.69111	0.644592
27.4	0.911821	0.9726	0.591889	0.171236	0.692594	0.644732
27.5	0.910041	0.970633	0.594158	0.171548	0.69293	0.645669
27.6	0.911122	0.968771	0.592428	0.170235	0.695827	0.645532
27.7	0.910312	0.969554	0.59211	0.171004	0.697861	0.645506
27.8	0.910296	0.972166	0.59301	0.173026	0.69691	0.646788
27.9	0.912849	0.972236	0.593191	0.171843	0.697743	0.644496
28	0.907725	0.972003	0.592947	0.173995	0.692934	0.646243
28.1	0.911792	0.969685	0.596351	0.173093	0.698044	0.646721
28.2	0.907187	0.971165	0.591072	0.174663	0.69472	0.646473
28.3	0.913855	0.966594	0.592157	0.172222	0.694259	0.647472
28.4	0.906373	0.972113	0.594301	0.173999	0.694178	0.648356
28.5	0.908407	0.968479	0.592078	0.172782	0.696059	0.646485
28.6	0.908765	0.969601	0.592096	0.174689	0.696	0.647594
28.7	0.909699	0.962006	0.595264	0.173521	0.692627	0.647493
28.8	0.909781	0.969365	0.594486	0.172537	0.698596	0.646395
28.9	0.909612	0.968811	0.593987	0.176354	0.69579	0.649174
29	0.910432	0.965963	0.59277	0.173799	0.696682	0.647132
29.1	0.907833	0.964082	0.59413	0.174056	0.696556	0.64782
29.2	0.907969	0.965872	0.593782	0.17521	0.692806	0.647753
29.3	0.909858	0.964644	0.596978	0.175184	0.696908	0.647971
29.4	0.90634	0.96375	0.591023	0.174001	0.695416	0.649425
29.5	0.905742	0.964284	0.592662	0.174186	0.693242	0.64675
29.6	0.908136	0.95917	0.591329	0.174685	0.693685	0.646076
29.7	0.90644	0.967574	0.594574	0.174972	0.695184	0.648407
29.8	0.908926	0.960043	0.591752	0.174773	0.692014	0.646247
29.9	0.908736	0.961087	0.593328	0.175033	0.693551	0.647145
30	0.904571	0.96178	0.593092	0.175591	0.690878	0.65009
30.1	0.905426	0.958852	0.5907	0.17555	0.692802	0.650693
30.2	0.904714	0.960446	0.591437	0.176648	0.691275	0.646518
30.3	0.903533	0.959721	0.591188	0.176318	0.695147	0.648759
30.4	0.903055	0.957244	0.589293	0.175188	0.690959	0.647546

## Sheet: primary data n=3
	PCP-pep86		PCP-DHFR-pep86		PCP-pep86-DHFR
time	-MTX	+MTX	-MTX	+MTX	-MTX	+MTX
0	0.010287	0.002339	0.002431	0.002032	0.001536	0.001105
0.1	0.018578	0.005447	0.003608	0.002085	0.00277	0.001778
0.2	0.029306	0.010189	0.005562	0.002274	0.00502	0.003023
0.3	0.042445	0.016924	0.008047	0.002459	0.008012	0.004459
0.4	0.056625	0.025835	0.010963	0.00289	0.012273	0.006259
0.5	0.073407	0.034814	0.014782	0.003395	0.017788	0.009381
0.6	0.090603	0.046214	0.018934	0.003615	0.022734	0.012922
0.7	0.108079	0.05736	0.02372	0.004239	0.029526	0.016441
0.8	0.1266	0.070121	0.028392	0.004829	0.035634	0.020458
0.9	0.146671	0.084647	0.033645	0.00551	0.042726	0.024877
1	0.164537	0.099786	0.039296	0.006215	0.050913	0.029843
1.1	0.18334	0.111607	0.045857	0.007057	0.05797	0.034448
1.2	0.201981	0.127125	0.051783	0.007904	0.06432	0.04026
1.3	0.221969	0.140427	0.058405	0.0088	0.073159	0.044506
1.4	0.238943	0.155192	0.065292	0.009571	0.080691	0.049683
1.5	0.256578	0.171925	0.071801	0.01107	0.087789	0.055554
1.6	0.275264	0.185181	0.078739	0.012036	0.095336	0.060538
1.7	0.294536	0.200051	0.087088	0.013113	0.102778	0.066652
1.8	0.311288	0.218161	0.093068	0.013757	0.109287	0.071072
1.9	0.330237	0.230497	0.100191	0.015727	0.117058	0.076811
2	0.344099	0.242272	0.109531	0.016556	0.122916	0.081594
2.1	0.3615	0.257209	0.114347	0.017627	0.131573	0.085709
2.2	0.373275	0.272531	0.122964	0.018756	0.137385	0.090629
2.3	0.391171	0.285875	0.129416	0.020675	0.144875	0.097717
2.4	0.404491	0.297219	0.138445	0.021665	0.152115	0.103522
2.5	0.42388	0.312556	0.145894	0.022978	0.158626	0.107392
2.6	0.435875	0.32805	0.151267	0.024453	0.165577	0.111404
2.7	0.449606	0.337166	0.161061	0.025062	0.172662	0.116597
2.8	0.462533	0.348935	0.16697	0.027376	0.177739	0.1238
2.9	0.474771	0.361567	0.175328	0.027944	0.185079	0.128206
3	0.487828	0.374413	0.181541	0.029352	0.191275	0.131077
3.1	0.49897	0.386943	0.189834	0.031393	0.198349	0.135316
3.2	0.517134	0.400613	0.196521	0.032655	0.201992	0.140645
3.3	0.524855	0.418507	0.200795	0.03482	0.209959	0.145889
3.4	0.536825	0.428296	0.211491	0.035745	0.213952	0.149423
3.5	0.547179	0.441357	0.219064	0.037005	0.220285	0.154109
3.6	0.558278	0.451465	0.224746	0.037902	0.226815	0.159965
3.7	0.567652	0.463222	0.23122	0.039599	0.231431	0.162271
3.8	0.578816	0.474144	0.237639	0.040931	0.239724	0.167305
3.9	0.59055	0.482168	0.24496	0.041999	0.241861	0.170168
4	0.603785	0.492961	0.251299	0.044278	0.249273	0.175491
4.1	0.61102	0.499901	0.257849	0.044458	0.25315	0.179045
4.2	0.61769	0.512664	0.264062	0.047122	0.259448	0.184809
4.3	0.629339	0.520391	0.270244	0.049274	0.265622	0.189164
4.4	0.637689	0.52811	0.27407	0.049398	0.27081	0.193274
4.5	0.646273	0.539017	0.279564	0.052329	0.27536	0.196097
4.6	0.652458	0.547323	0.288027	0.05306	0.27964	0.201944
4.7	0.663341	0.554452	0.292242	0.054016	0.283407	0.205274
4.8	0.671144	0.56631	0.299793	0.055456	0.290273	0.206201
4.9	0.67754	0.569426	0.304681	0.057589	0.292984	0.211075
5	0.685894	0.578146	0.310602	0.059304	0.298895	0.215998
5.1	0.694638	0.586683	0.316036	0.060396	0.303042	0.219397
5.2	0.700267	0.596016	0.320837	0.061373	0.306992	0.222134
5.3	0.704317	0.600934	0.325489	0.062931	0.311586	0.226726
5.4	0.714575	0.605291	0.332448	0.064054	0.315501	0.228312
5.5	0.721491	0.61455	0.336529	0.066474	0.321644	0.233914
5.6	0.728309	0.622092	0.341029	0.066298	0.326277	0.237023
5.7	0.733197	0.625072	0.347464	0.068239	0.331967	0.239811
5.8	0.738121	0.637965	0.353361	0.070095	0.331876	0.242807
5.9	0.745548	0.640002	0.357102	0.071642	0.338163	0.247895
6	0.751987	0.645708	0.360227	0.073063	0.341753	0.250269
6.1	0.75746	0.649914	0.367974	0.07532	0.346815	0.25369
6.2	0.769279	0.658109	0.371242	0.076214	0.347892	0.256265
6.3	0.773653	0.66039	0.374857	0.076882	0.351707	0.260617
6.4	0.781206	0.669375	0.382547	0.078691	0.358303	0.263265
6.5	0.787275	0.673871	0.382869	0.079964	0.362002	0.267156
6.6	0.788022	0.680822	0.386941	0.081089	0.36509	0.270956
6.7	0.790076	0.681126	0.392818	0.082954	0.368128	0.273008
6.8	0.797834	0.689295	0.394833	0.08385	0.37176	0.277242
6.9	0.805078	0.694966	0.400494	0.084764	0.374933	0.279925
7	0.808902	0.698901	0.40228	0.085735	0.379324	0.281812
7.1	0.816448	0.707688	0.407888	0.08844	0.384144	0.28631
7.2	0.818762	0.706726	0.411524	0.088997	0.385169	0.287187
7.3	0.824224	0.710399	0.416821	0.091008	0.388388	0.289749
7.4	0.824855	0.713984	0.417807	0.091828	0.395323	0.293407
7.5	0.832367	0.723082	0.426422	0.093042	0.396555	0.298094
7.6	0.834665	0.722433	0.428291	0.094613	0.400398	0.300483
7.7	0.835907	0.729795	0.430572	0.096998	0.405703	0.302838
7.8	0.842066	0.730872	0.434424	0.097969	0.405281	0.304677
7.9	0.847761	0.735817	0.438861	0.099616	0.410295	0.307808
8	0.852579	0.741525	0.463135	0.099921	0.413618	0.309149
8.1	0.848329	0.740484	0.465945	0.10038	0.417211	0.312948
8.2	0.856698	0.745106	0.466108	0.101288	0.420116	0.316404
8.3	0.866765	0.751974	0.470251	0.102339	0.424801	0.317477
8.4	0.870819	0.75251	0.474212	0.104817	0.426305	0.320079
8.5	0.872044	0.760041	0.477537	0.105879	0.426233	0.321311
8.6	0.878575	0.755889	0.478181	0.10569	0.431412	0.323707
8.7	0.878333	0.762814	0.480005	0.107777	0.431965	0.327025
8.8	0.882798	0.767172	0.485904	0.109755	0.437074	0.332962
8.9	0.882285	0.769755	0.488574	0.109681	0.440212	0.331473
9	0.889135	0.772937	0.489188	0.111491	0.445711	0.334128
9.1	0.887812	0.77256	0.492498	0.111191	0.446262	0.335956
9.2	0.890811	0.780053	0.495159	0.113433	0.445587	0.341414
9.3	0.898451	0.784736	0.49784	0.11446	0.449515	0.344413
9.4	0.900323	0.783889	0.500275	0.115321	0.453774	0.344632
9.5	0.901132	0.791817	0.504092	0.115789	0.457993	0.345986
9.6	0.907487	0.789789	0.506438	0.120509	0.458267	0.347011
9.7	0.911649	0.794474	0.507256	0.122557	0.462896	0.351152
9.8	0.911279	0.794398	0.509339	0.123826	0.462245	0.351666
9.9	0.914058	0.798587	0.509193	0.125314	0.467002	0.355478
10	0.916219	0.802882	0.516089	0.127299	0.466569	0.355883
10.1	0.920191	0.80297	0.515954	0.127693	0.469516	0.358525
10.2	0.926079	0.801827	0.519129	0.128742	0.473109	0.362174
10.3	0.922376	0.808564	0.523947	0.129455	0.472264	0.364553
10.4	0.926706	0.810597	0.523164	0.131446	0.4753	0.369268
10.5	0.926012	0.811676	0.527281	0.132804	0.478431	0.373997
10.6	0.931903	0.815511	0.52705	0.134141	0.480246	0.375462
10.7	0.934351	0.816892	0.52915	0.134008	0.481121	0.376378
10.8	0.927409	0.817776	0.52977	0.137255	0.483769	0.381091
10.9	0.936081	0.820992	0.532874	0.136064	0.489075	0.383935
11	0.935526	0.824372	0.533555	0.137313	0.488816	0.384508
11.1	0.942474	0.821373	0.536912	0.137925	0.490176	0.389078
11.2	0.938718	0.82447	0.539498	0.140538	0.494102	0.388214
11.3	0.937232	0.825986	0.537465	0.140869	0.493188	0.388185
11.4	0.947471	0.827995	0.541517	0.142449	0.494859	0.391693
11.5	0.948036	0.831488	0.54318	0.142997	0.501775	0.394622
11.6	0.950824	0.832624	0.546764	0.143245	0.500467	0.394625
11.7	0.949673	0.836408	0.546949	0.143557	0.501141	0.395428
11.8	0.953316	0.834378	0.547391	0.145069	0.503381	0.398542
11.9	0.956647	0.837898	0.550383	0.145528	0.505365	0.397092
12	0.955422	0.837459	0.551294	0.145657	0.507837	0.401151
12.1	0.954328	0.837522	0.550483	0.147578	0.507069	0.403118
12.2	0.956536	0.84194	0.554541	0.147961	0.512301	0.407133
12.3	0.9592	0.8414	0.555784	0.148725	0.512401	0.406891
12.4	0.959426	0.844076	0.557544	0.15163	0.513961	0.408075
12.5	0.958571	0.844409	0.555512	0.151539	0.513254	0.409104
12.6	0.961587	0.84331	0.559442	0.151602	0.516067	0.412612
12.7	0.965036	0.848951	0.561437	0.150183	0.517351	0.412915
12.8	0.966731	0.845854	0.565766	0.153129	0.520335	0.415108
12.9	0.967713	0.842529	0.563705	0.153464	0.521893	0.414947
13	0.968525	0.848387	0.566647	0.15418	0.520783	0.417493
13.1	0.96644	0.850818	0.56263	0.154102	0.523122	0.41841
13.2	0.967839	0.850263	0.56542	0.157386	0.525873	0.421539
13.3	0.969617	0.854054	0.568116	0.158563	0.525703	0.422775
13.4	0.968673	0.853562	0.56967	0.157688	0.529514	0.422794
13.5	0.975899	0.85534	0.569737	0.159723	0.52912	0.425203
13.6	0.977081	0.854648	0.569058	0.160478	0.531846	0.423639
13.7	0.976158	0.857442	0.573487	0.160245	0.52932	0.426483
13.8	0.978663	0.857949	0.572936	0.162102	0.535187	0.427014
13.9	0.977061	0.854515	0.571408	0.160498	0.533176	0.429086
14	0.980696	0.856104	0.57429	0.163577	0.536146	0.431501
14.1	0.975475	0.863481	0.574949	0.164917	0.536764	0.431993
14.2	0.984708	0.861259	0.578022	0.163727	0.538782	0.433088
14.3	0.977416	0.863607	0.575584	0.16517	0.54143	0.435518
14.4	0.981013	0.862071	0.575972	0.165995	0.542307	0.435166
14.5	0.983061	0.862957	0.578642	0.165816	0.543715	0.437281
14.6	0.980199	0.860861	0.58027	0.1671	0.543669	0.436896
14.7	0.985135	0.862706	0.579451	0.168774	0.544855	0.438839
14.8	0.985128	0.867226	0.578557	0.168203	0.54464	0.438284
14.9	0.984987	0.864251	0.581096	0.168288	0.544427	0.44164
15	0.989796	0.86391	0.584652	0.170382	0.547654	0.439013
15.1	0.981777	0.866641	0.581538	0.170319	0.552078	0.443648
15.2	0.985427	0.86846	0.582911	0.171052	0.549414	0.446062
15.3	0.984959	0.869056	0.587823	0.168882	0.551423	0.444247
15.4	0.986906	0.870458	0.58712	0.171583	0.551627	0.445404
15.5	0.984386	0.872893	0.588391	0.171076	0.550996	0.4471
15.6	0.991126	0.8676	0.587116	0.174366	0.551264	0.447274
15.7	0.989006	0.868784	0.587153	0.173837	0.552881	0.449979
15.8	0.991052	0.869404	0.589063	0.174434	0.555666	0.450057
15.9	0.98885	0.871091	0.589627	0.173768	0.55415	0.44975
16	0.992305	0.874192	0.58954	0.176375	0.557527	0.452213
16.1	0.991319	0.871879	0.594005	0.176148	0.559733	0.453685
16.2	0.991587	0.874035	0.59068	0.176081	0.55816	0.448997
16.3	0.992412	0.877693	0.589044	0.17772	0.56014	0.452768
16.4	0.986985	0.872007	0.595209	0.177713	0.55994	0.455436
16.5	0.99061	0.870673	0.59574	0.178638	0.559884	0.457523
16.6	0.996412	0.872264	0.596253	0.179896	0.561905	0.458326
16.7	0.991507	0.870408	0.59231	0.178888	0.56169	0.455351
16.8	0.995071	0.873319	0.596913	0.179188	0.561907	0.460232
16.9	0.993234	0.875909	0.593607	0.179828	0.563476	0.462948
17	0.992242	0.874446	0.596123	0.178932	0.565957	0.459586
17.1	0.995056	0.881852	0.596014	0.182263	0.565093	0.465364
17.2	0.996133	0.878627	0.595422	0.181813	0.56312	0.46233
17.3	0.997191	0.880873	0.600055	0.183412	0.566116	0.460827
17.4	0.995541	0.87721	0.600516	0.184048	0.56476	0.471185
17.5	0.99602	0.881021	0.600148	0.183536	0.567359	0.465714
17.6	0.999199	0.877765	0.600468	0.18427	0.567605	0.467525
17.7	0.99847	0.875907	0.599354	0.184938	0.570177	0.468632
17.8	0.9958	0.877282	0.601025	0.185947	0.57219	0.468843
17.9	0.996153	0.876616	0.600357	0.184772	0.569783	0.470745
18	0.990401	0.879393	0.601567	0.186428	0.570956	0.47305
18.1	0.99521	0.8804	0.597874	0.185473	0.568991	0.469163
18.2	0.996568	0.87694	0.596617	0.185238	0.571676	0.472432
18.3	0.996061	0.879073	0.599415	0.185756	0.573907	0.472423
18.4	0.995591	0.876836	0.59982	0.188709	0.575756	0.474519
18.5	0.995424	0.87891	0.599887	0.188032	0.575452	0.474292
18.6	0.996446	0.883806	0.600886	0.186685	0.575034	0.475598
18.7	0.99706	0.878866	0.600999	0.189075	0.575212	0.474588
18.8	0.997141	0.877957	0.601054	0.190067	0.574588	0.474118
18.9	0.998566	0.880218	0.601837	0.190833	0.576498	0.47656
19	0.996322	0.876244	0.60336	0.189775	0.577478	0.478488
19.1	0.994122	0.874255	0.600018	0.191031	0.575587	0.477665
19.2	0.996166	0.881717	0.604429	0.192609	0.575554	0.48249
19.3	0.998009	0.877937	0.607347	0.191344	0.579682	0.483813
19.4	0.996564	0.878557	0.603291	0.191725	0.577589	0.478932
19.5	0.997415	0.879438	0.603911	0.193712	0.57597	0.481846
19.6	0.997669	0.882613	0.606779	0.191649	0.579778	0.483058
19.7	0.994279	0.876814	0.603835	0.19327	0.580957	0.484407
19.8	0.996642	0.87911	0.606459	0.193766	0.581392	0.483815
19.9	0.996825	0.877197	0.602597	0.194308	0.579789	0.485839
20	0.992867	0.876705	0.606098	0.192591	0.58287	0.482651
20.1	0.995709	0.877003	0.601713	0.195932	0.580313	0.486006
20.2	0.998416	0.876984	0.606483	0.195897	0.581725	0.484827
20.3	0.997282	0.876475	0.603889	0.194395	0.581984	0.486836
20.4	1	0.880703	0.603887	0.195442	0.584365	0.48761
20.5	0.99367	0.879983	0.601485	0.196378	0.583749	0.487097
20.6	0.9935	0.878618	0.604927	0.19678	0.587268	0.487147
20.7	0.998921	0.873258	0.608751	0.198741	0.582792	0.489164
20.8	0.998357	0.879943	0.607206	0.197416	0.585403	0.487286
20.9	0.997343	0.878699	0.60647	0.198262	0.582206	0.48781
21	0.989341	0.878044	0.603822	0.198247	0.58438	0.491954
21.1	0.994407	0.875197	0.607765	0.195988	0.583656	0.491075
21.2	0.988332	0.876098	0.60561	0.199814	0.586752	0.491632
21.3	0.995942	0.881987	0.608472	0.199809	0.587018	0.492504
21.4	0.997117	0.877378	0.608914	0.198969	0.585116	0.491381
21.5	0.992003	0.877413	0.606011	0.200303	0.588617	0.494034
21.6	0.991365	0.878474	0.606738	0.200734	0.585405	0.493444
21.7	0.996775	0.883023	0.604984	0.199318	0.585862	0.491976
21.8	0.988793	0.884994	0.607317	0.199951	0.586458	0.494413
21.9	0.992586	0.877756	0.606102	0.200712	0.58537	0.493688
22	0.991091	0.878518	0.606614	0.202662	0.585449	0.493227
22.1	0.991787	0.878627	0.607286	0.202155	0.58754	0.494128
22.2	0.991726	0.878836	0.608455	0.202852	0.586702	0.495703
22.3	0.989629	0.877001	0.606159	0.203726	0.587938	0.495877
22.4	0.990625	0.881303	0.607895	0.200218	0.589688	0.498994
22.5	0.993528	0.878916	0.607193	0.204856	0.58924	0.497081
22.6	0.987228	0.876146	0.607173	0.203785	0.589372	0.493941
22.7	0.989072	0.8796	0.610922	0.203335	0.589601	0.497764
22.8	0.986219	0.881634	0.610237	0.204212	0.586998	0.498056
22.9	0.989589	0.880794	0.610546	0.203132	0.589895	0.497829
23	0.990469	0.878431	0.609449	0.201957	0.592005	0.49747
23.1	0.98945	0.882442	0.608929	0.205143	0.591202	0.498269
23.2	0.989896	0.879399	0.605933	0.205546	0.590852	0.499494
23.3	0.987483	0.879523	0.608975	0.204005	0.592258	0.49893
23.4	0.990427	0.876137	0.607473	0.203853	0.592127	0.500319
23.5	0.986972	0.874179	0.607895	0.206884	0.590321	0.49579
23.6	0.985318	0.879023	0.606144	0.206762	0.590565	0.501574
23.7	0.98493	0.876292	0.606318	0.206642	0.590993	0.502769
23.8	0.988088	0.881734	0.611473	0.207474	0.592319	0.499424
23.9	0.984885	0.880548	0.606725	0.207485	0.590143	0.500917
24	0.989048	0.875754	0.606564	0.206732	0.593957	0.502375
24.1	0.980752	0.878688	0.607806	0.206399	0.587903	0.500001
24.2	0.984042	0.875025	0.609884	0.208449	0.589877	0.504175
24.3	0.985154	0.874977	0.607484	0.20856	0.589716	0.502941
24.4	0.985394	0.876805	0.610278	0.20683	0.588935	0.501503
24.5	0.981311	0.874159	0.605952	0.207254	0.591683	0.503594
24.6	0.982136	0.879943	0.609897	0.209669	0.593857	0.504362
24.7	0.980689	0.874788	0.604483	0.209278	0.594656	0.506523
24.8	0.982312	0.875162	0.60687	0.208229	0.590306	0.504192
24.9	0.986047	0.873406	0.606729	0.209143	0.590748	0.504538
25	0.984306	0.874307	0.607471	0.208311	0.595215	0.503189
25.1	0.97828	0.876895	0.609417	0.208764	0.592034	0.503378
25.2	0.982578	0.874405	0.605497	0.207678	0.588737	0.506516
25.3	0.981009	0.873363	0.605911	0.210192	0.595411	0.503936
25.4	0.981673	0.873713	0.608248	0.209935	0.593011	0.504549
25.5	0.979118	0.870484	0.605748	0.210377	0.591207	0.506519
25.6	0.978722	0.872514	0.608259	0.209883	0.588669	0.507298
25.7	0.97976	0.870116	0.607395	0.210627	0.590066	0.506949
25.8	0.976918	0.87279	0.606901	0.21049	0.593605	0.504823
25.9	0.984547	0.871687	0.607116	0.21333	0.595309	0.504747
26	0.979993	0.867964	0.606453	0.211909	0.590745	0.508479
26.1	0.974866	0.872222	0.607793	0.21113	0.59315	0.508649
26.2	0.978319	0.872732	0.605349	0.211275	0.593278	0.5058
26.3	0.975693	0.869785	0.604098	0.211778	0.593265	0.503394
26.4	0.978979	0.870547	0.606746	0.211785	0.588582	0.506967
26.5	0.972246	0.870923	0.606749	0.212396	0.591403	0.508564
26.6	0.975695	0.871557	0.603593	0.213051	0.592055	0.50555
26.7	0.969238	0.867191	0.603432	0.212773	0.593509	0.503463
26.8	0.972067	0.868926	0.605053	0.211728	0.590056	0.508236
26.9	0.97727	0.868449	0.605702	0.21151	0.593994	0.506373
27	0.97126	0.868229	0.602285	0.213247	0.588728	0.507713
27.1	0.969003	0.865674	0.604779	0.21385	0.594184	0.50649
27.2	0.970372	0.868399	0.608596	0.213273	0.593093	0.51093
27.3	0.972104	0.866092	0.606242	0.212796	0.591246	0.506795
27.4	0.970603	0.865289	0.601798	0.213606	0.592497	0.509219
27.5	0.971441	0.866789	0.604403	0.213887	0.589438	0.506299
27.6	0.970107	0.871087	0.602673	0.213778	0.593372	0.50908
27.7	0.968009	0.867818	0.606633	0.212875	0.590882	0.508516
27.8	0.969323	0.867533	0.605943	0.213869	0.594377	0.509015
27.9	0.967959	0.869807	0.604794	0.213301	0.593818	0.50592
28	0.971623	0.862854	0.601724	0.215998	0.594593	0.510697
28.1	0.965219	0.862654	0.607105	0.213935	0.594517	0.510692
28.2	0.969887	0.864943	0.604692	0.214779	0.593798	0.510507
28.3	0.967967	0.866271	0.604625	0.215464	0.592414	0.511252
28.4	0.965876	0.862019	0.602884	0.216722	0.593405	0.513286
28.5	0.966435	0.861575	0.602581	0.216905	0.594388	0.510283
28.6	0.97054	0.863403	0.603528	0.214472	0.594138	0.512301
28.7	0.964525	0.860269	0.601154	0.216276	0.590077	0.507095
28.8	0.96143	0.861168	0.603571	0.215121	0.592869	0.512111
28.9	0.962643	0.856996	0.603217	0.216348	0.595483	0.511056
29	0.96271	0.862486	0.603376	0.216159	0.595472	0.511006
29.1	0.96172	0.857238	0.603948	0.216048	0.594212	0.5116
29.2	0.961163	0.861055	0.601517	0.215214	0.595962	0.510686
29.3	0.961766	0.856746	0.605021	0.215434	0.591202	0.511898
29.4	0.964462	0.85764	0.603639	0.214548	0.592565	0.512283
29.5	0.961385	0.85907	0.605743	0.216868	0.592471	0.51373
29.6	0.959413	0.858674	0.602694	0.218134	0.59673	0.512344
29.7	0.960832	0.861542	0.602795	0.216703	0.591949	0.510344
29.8	0.957498	0.85813	0.60257	0.216805	0.590824	0.515082
29.9	0.962273	0.860119	0.602396	0.217482	0.589327	0.509813
30	0.954558	0.853638	0.600999	0.216975	0.590974	0.514531
30.1	0.95371	0.857747	0.6022	0.217029	0.594673	0.515206
30.2	0.956813	0.855482	0.599739	0.217973	0.592086	0.510588
30.3	0.956708	0.857386	0.599894	0.21889	0.592841	0.512895
30.4	0.9552	0.855205	0.602999	0.218041	0.592961	0.508714

## Sheet: secondary data n=1-3
PCP-pep86 -MTX	PCP-pep86 +MTX	PCP-DHFR-pep86 -MTX	PCP-DHFR-pep86 +MTX	PCP-pep86-DHFR -MTX	PCP-pep86-DHFR +MTX
0.9989	0.9699	0.5449	0.1672	0.7542	0.6328
0.9169	1.003	0.6045	0.184	0.7035	0.6535
1	0.8879	0.6252	0.2246	0.8737	~ 0.6685
Excluded on the basis that Prism identified this parameter as an "ambiguous" fit to the model
