# Supplementary material for: Towards a molecular mechanism underlying mitochondrial protein import through the TOM and TIM23 complexes
Source: eLife. 2022 Jun 8;11:e75426. doi: 10.7554/eLife.75426 (PMC9255969; doi:10.7554/eLife.75426)
Supplement: Figure 2—source data 2. [file elife-75426-fig2-data2.xlsx]

## Sheet: primary data
	-MTX								+MTX
time	0.15625	0.3125	0.625	1.25	2.5	5	10	20	0.15625	0.3125	0.625	1.25	2.5	5	10	20
0	0.001044	0.000939	0.000584	0.000491	0.000646	0.000564	0.000406	0.000692	0.000758	0.000993	0.000742	0.000634	0.000703	0.000591	0.00056	0.000622
0.1	0.001125	0.001024	0.000588	0.000615	0.00063	0.000738	0.000858	0.001001	0.00102	0.00114	0.000819	0.000541	0.000584	0.000673	0.000816	0.000688
0.2	0.001264	0.001071	0.000843	0.00087	0.00085	0.001005	0.001175	0.001376	0.001017	0.001469	0.000854	0.000692	0.000769	0.00097	0.001028	0.001198
0.3	0.001616	0.001136	0.000843	0.000846	0.000846	0.001395	0.002238	0.002273	0.001133	0.001484	0.001075	0.000758	0.001036	0.001013	0.001519	0.00208
0.4	0.0016	0.001299	0.000897	0.00099	0.001148	0.001929	0.003092	0.004445	0.001241	0.001542	0.001272	0.000877	0.001063	0.001848	0.002474	0.003208
0.5	0.001921	0.001658	0.000966	0.001299	0.001581	0.002536	0.004418	0.006378	0.001511	0.001739	0.001206	0.001055	0.001457	0.002022	0.003069	0.00436
0.6	0.002184	0.001998	0.001306	0.001426	0.001913	0.003363	0.006308	0.009659	0.001542	0.001971	0.001303	0.001337	0.001801	0.002381	0.004604	0.005551
0.7	0.002578	0.001824	0.001496	0.001596	0.002408	0.004283	0.008102	0.01284	0.001678	0.002671	0.001708	0.001465	0.002068	0.003347	0.005357	0.007634
0.8	0.002346	0.002188	0.001623	0.00201	0.002787	0.006223	0.010228	0.016829	0.001886	0.002702	0.001821	0.001712	0.002412	0.003761	0.007309	0.010517
0.9	0.002536	0.00225	0.002022	0.001967	0.003452	0.007812	0.012987	0.021649	0.002253	0.00276	0.001805	0.00189	0.002775	0.004673	0.009215	0.012438
1	0.002822	0.002211	0.002168	0.002516	0.003575	0.008678	0.017127	0.026848	0.002404	0.002729	0.002153	0.00184	0.003023	0.005388	0.010622	0.015361
1.1	0.003251	0.002895	0.002149	0.002524	0.004565	0.010092	0.019152	0.032495	0.002362	0.003027	0.002226	0.002625	0.003815	0.006552	0.013003	0.016984
1.2	0.003834	0.00293	0.002435	0.003104	0.005052	0.011878	0.023737	0.038931	0.002489	0.003548	0.002338	0.002474	0.004062	0.007406	0.015399	0.020509
1.3	0.003343	0.003282	0.002648	0.003007	0.005844	0.013351	0.026616	0.044443	0.002536	0.003834	0.002396	0.003204	0.004673	0.008233	0.016675	0.024266
1.4	0.003672	0.003197	0.002856	0.003228	0.006258	0.015044	0.031081	0.050655	0.002686	0.00402	0.003023	0.002984	0.004955	0.009377	0.018924	0.026292
1.5	0.004062	0.003425	0.003061	0.0039	0.007576	0.017753	0.034343	0.059448	0.002798	0.004066	0.002965	0.0031	0.005566	0.010255	0.020826	0.029635
1.6	0.004171	0.00397	0.003568	0.004008	0.008032	0.01935	0.039496	0.065578	0.003069	0.004662	0.003119	0.003819	0.005562	0.01056	0.023996	0.03277
1.7	0.004491	0.003653	0.003564	0.004619	0.008774	0.020989	0.04379	0.073247	0.003003	0.004681	0.003266	0.003602	0.006579	0.01182	0.026694	0.036666
1.8	0.004905	0.004035	0.003637	0.005187	0.009741	0.024123	0.048111	0.080468	0.003336	0.004886	0.003386	0.004348	0.007135	0.013459	0.027846	0.039913
1.9	0.004932	0.004321	0.003861	0.005033	0.010023	0.024854	0.053932	0.089481	0.003548	0.005141	0.003881	0.004086	0.007719	0.014541	0.03069	0.043972
2	0.005585	0.00472	0.004294	0.005879	0.011001	0.027641	0.058014	0.096072	0.003823	0.005659	0.00385	0.00489	0.008353	0.016505	0.033292	0.047903
2.1	0.00535	0.004716	0.004573	0.006003	0.011863	0.029407	0.063167	0.102751	0.004163	0.005562	0.003977	0.004975	0.008461	0.016354	0.034733	0.051667
2.2	0.005902	0.005052	0.004685	0.006787	0.01298	0.031792	0.068269	0.112835	0.003803	0.0062	0.004186	0.00545	0.009203	0.018565	0.038695	0.055792
2.3	0.005195	0.005029	0.004696	0.007043	0.013764	0.033879	0.074623	0.116851	0.003974	0.006196	0.004144	0.005554	0.009532	0.020181	0.041904	0.059541
2.4	0.006138	0.005605	0.005191	0.007487	0.014943	0.036156	0.077147	0.127543	0.00426	0.006517	0.00487	0.006154	0.010653	0.020436	0.043875	0.063599
2.5	0.00678	0.005682	0.005334	0.007796	0.015461	0.039863	0.083598	0.137079	0.004294	0.006382	0.004681	0.005941	0.011283	0.022036	0.048888	0.065888
2.6	0.006757	0.005825	0.005551	0.008407	0.01608	0.041989	0.088295	0.145304	0.004557	0.006671	0.005083	0.006119	0.011472	0.022013	0.049066	0.069463
2.7	0.006513	0.005779	0.005752	0.008109	0.017587	0.043206	0.092195	0.152636	0.005106	0.006552	0.004967	0.007282	0.0125	0.024274	0.051683	0.074016
2.8	0.006455	0.005794	0.005968	0.008473	0.0186	0.045027	0.098155	0.161476	0.004971	0.00736	0.005705	0.007213	0.012326	0.025252	0.056313	0.07862
2.9	0.007348	0.006076	0.006614	0.008967	0.020038	0.047891	0.100954	0.168666	0.005149	0.00768	0.005265	0.007166	0.013219	0.027053	0.057608	0.082215
3	0.007159	0.006041	0.005941	0.009748	0.01967	0.050871	0.10805	0.174858	0.00494	0.00736	0.005701	0.007367	0.013961	0.027989	0.060979	0.084348
3.1	0.007027	0.006718	0.006776	0.010208	0.021383	0.053484	0.113431	0.182859	0.005118	0.00763	0.006181	0.007796	0.013834	0.028568	0.062386	0.091712
3.2	0.007804	0.007216	0.007004	0.010344	0.022531	0.056143	0.117296	0.191571	0.005249	0.007881	0.005852	0.008473	0.015469	0.030551	0.063507	0.091913
3.3	0.008179	0.007286	0.007715	0.010769	0.023961	0.058439	0.124864	0.200929	0.005956	0.008569	0.0063	0.008612	0.016323	0.032499	0.068887	0.098174
3.4	0.008194	0.007576	0.007595	0.011376	0.024761	0.060944	0.127956	0.208169	0.005752	0.008384	0.006675	0.00843	0.016474	0.033377	0.07063	0.101
3.5	0.008337	0.007634	0.007611	0.012288	0.026431	0.063464	0.133553	0.215737	0.005871	0.008167	0.006289	0.009064	0.017212	0.033299	0.07317	0.105031
3.6	0.00804	0.007599	0.007901	0.012524	0.026095	0.066127	0.138516	0.223796	0.006049	0.008863	0.006818	0.0093	0.01785	0.034768	0.075829	0.109334
3.7	0.008511	0.007947	0.008492	0.013041	0.02754	0.069718	0.142869	0.228721	0.006262	0.008778	0.007197	0.00947	0.018159	0.036237	0.078755	0.113601
3.8	0.008442	0.007866	0.008855	0.013641	0.030188	0.07121	0.147654	0.241461	0.006486	0.009547	0.007271	0.009389	0.019156	0.03718	0.082091	0.116388
3.9	0.009018	0.008488	0.008766	0.013985	0.030107	0.072915	0.153085	0.245759	0.006293	0.009814	0.00717	0.010108	0.019744	0.038641	0.083834	0.120968
4	0.008944	0.008751	0.008933	0.014406	0.030984	0.076911	0.159176	0.253973	0.006308	0.009636	0.007131	0.010042	0.019949	0.039832	0.085887	0.12326
4.1	0.008933	0.008426	0.009288	0.014719	0.032032	0.07775	0.162311	0.26093	0.006776	0.009849	0.007696	0.010228	0.020099	0.041262	0.088882	0.128119
4.2	0.0093	0.008739	0.009107	0.015368	0.033759	0.080533	0.169079	0.267764	0.006579	0.010115	0.00741	0.011298	0.021155	0.041703	0.090633	0.129
4.3	0.00954	0.008832	0.009617	0.016111	0.033539	0.083799	0.172744	0.279236	0.007236	0.010371	0.008202	0.011213	0.021557	0.043303	0.094522	0.134721
4.4	0.010088	0.008964	0.010077	0.015867	0.034625	0.086648	0.183431	0.284358	0.006834	0.010251	0.007893	0.011577	0.022082	0.045707	0.095674	0.136939
4.5	0.00976	0.00918	0.010444	0.016474	0.035851	0.086807	0.186388	0.293947	0.007302	0.010931	0.007924	0.011897	0.022894	0.046426	0.100656	0.142985
4.6	0.009945	0.009648	0.010224	0.01739	0.037451	0.091712	0.187787	0.301597	0.00712	0.010332	0.00804	0.011689	0.023532	0.04638	0.102152	0.145145
4.7	0.009868	0.009667	0.01068	0.017363	0.037911	0.091093	0.192147	0.306479	0.007015	0.011337	0.008368	0.011882	0.024317	0.047218	0.103988	0.148582
4.8	0.010162	0.009918	0.011488	0.018333	0.039507	0.095635	0.198973	0.313935	0.007236	0.011209	0.008434	0.012423	0.024208	0.049816	0.106678	0.152339
4.9	0.01066	0.010046	0.010811	0.01882	0.041073	0.09996	0.204106	0.321109	0.00751	0.011739	0.007854	0.012489	0.02524	0.050202	0.106067	0.158883
5	0.010688	0.010487	0.011291	0.019009	0.040814	0.102225	0.209816	0.326481	0.007557	0.011283	0.009532	0.013107	0.026585	0.051826	0.110934	0.159814
5.1	0.010803	0.010413	0.011658	0.019326	0.042522	0.102991	0.215246	0.332813	0.007959	0.011538	0.008527	0.013614	0.027018	0.05278	0.11495	0.163316
5.2	0.011542	0.010575	0.01204	0.020049	0.043593	0.106029	0.217844	0.343087	0.00797	0.01189	0.009945	0.012384	0.027003	0.05401	0.116407	0.166374
5.3	0.011217	0.010788	0.012098	0.020695	0.045433	0.107706	0.224952	0.344188	0.007684	0.01175	0.009234	0.013598	0.027401	0.05452	0.118069	0.170842
5.4	0.011406	0.010815	0.012149	0.021317	0.046658	0.113369	0.227461	0.358444	0.00775	0.012029	0.009829	0.014696	0.02853	0.057272	0.121343	0.172782
5.5	0.010823	0.011101	0.013289	0.021522	0.047489	0.111398	0.231144	0.365331	0.007974	0.012075	0.009636	0.014758	0.028901	0.058718	0.123612	0.177579
5.6	0.011279	0.0109	0.01257	0.021804	0.046028	0.116797	0.235771	0.370666	0.00867	0.01233	0.009621	0.014808	0.029531	0.058633	0.125529	0.181375
5.7	0.011847	0.011376	0.012663	0.021789	0.04924	0.118363	0.242238	0.374651	0.008461	0.012713	0.010251	0.014406	0.029944	0.060932	0.128443	0.184591
5.8	0.011642	0.011302	0.012895	0.023381	0.049139	0.119959	0.248453	0.385415	0.008171	0.01279	0.010154	0.014754	0.030312	0.060716	0.131072	0.186647
5.9	0.012168	0.010977	0.013563	0.023833	0.049599	0.124346	0.250617	0.391225	0.008612	0.013041	0.010324	0.015411	0.030957	0.06312	0.131644	0.191479
6	0.0117	0.011638	0.014116	0.024108	0.052549	0.124814	0.25783	0.396903	0.008446	0.013049	0.010904	0.01584	0.031197	0.065416	0.134512	0.195019
6.1	0.011739	0.012106	0.014209	0.023628	0.052112	0.128625	0.260853	0.400884	0.009219	0.012728	0.010935	0.01635	0.032086	0.065343	0.138458	0.198397
6.2	0.01218	0.012408	0.014193	0.024572	0.053577	0.132173	0.265437	0.4142	0.008616	0.013413	0.010807	0.016942	0.032727	0.066317	0.14048	0.19977
6.3	0.012396	0.012435	0.01446	0.024386	0.056031	0.135355	0.269179	0.417416	0.008577	0.013691	0.011043	0.016779	0.033655	0.067871	0.141485	0.203817
6.4	0.012976	0.012543	0.014178	0.025248	0.055162	0.135301	0.273968	0.421309	0.008782	0.01359	0.010865	0.017378	0.032905	0.069355	0.144569	0.206391
6.5	0.012783	0.012369	0.014325	0.026095	0.05658	0.138169	0.28016	0.43086	0.008635	0.014	0.010954	0.01734	0.033752	0.069745	0.144241	0.212823
6.6	0.012315	0.012473	0.014955	0.027235	0.058134	0.140778	0.288868	0.435336	0.009424	0.013617	0.011472	0.016942	0.034811	0.071241	0.148848	0.213128
6.7	0.012323	0.012968	0.015438	0.026412	0.060163	0.144732	0.288536	0.441149	0.009292	0.013861	0.011696	0.0178	0.035178	0.072513	0.151187	0.217295
6.8	0.013065	0.012164	0.015647	0.027076	0.059313	0.148187	0.294187	0.450147	0.009462	0.014707	0.011781	0.017943	0.034625	0.073676	0.153386	0.21978
6.9	0.013355	0.012469	0.015256	0.027648	0.060836	0.149188	0.297314	0.458044	0.009598	0.013942	0.011785	0.017722	0.035986	0.073468	0.15375	0.223023
7	0.013026	0.01376	0.015376	0.028572	0.061953	0.149849	0.301237	0.460607	0.009945	0.014533	0.011484	0.017877	0.036361	0.074337	0.156718	0.227236
7.1	0.0124	0.013285	0.015291	0.029148	0.063468	0.156417	0.309911	0.46906	0.00959	0.014622	0.011348	0.018797	0.037687	0.076761	0.160313	0.230159
7.2	0.013103	0.013729	0.015782	0.028885	0.065335	0.157978	0.313003	0.476748	0.009134	0.01458	0.012303	0.018832	0.037934	0.077816	0.162825	0.232292
7.3	0.013293	0.013942	0.016385	0.029484	0.063816	0.158233	0.315612	0.478136	0.009482	0.014773	0.011669	0.01855	0.038738	0.078798	0.162841	0.237228
7.4	0.013699	0.014275	0.017092	0.029732	0.066696	0.162048	0.320158	0.486914	0.009829	0.014537	0.012844	0.018178	0.03924	0.079768	0.167796	0.241105
7.5	0.013034	0.013559	0.01613	0.030126	0.06772	0.163633	0.325817	0.492364	0.010143	0.014901	0.012725	0.019435	0.040388	0.081295	0.167483	0.238674
7.6	0.013154	0.01359	0.01739	0.0311	0.068528	0.168399	0.328696	0.500694	0.009829	0.015249	0.012079	0.019833	0.039376	0.08201	0.169528	0.244344
7.7	0.013463	0.014452	0.016768	0.031185	0.068617	0.168921	0.333284	0.502936	0.010351	0.014997	0.012624	0.019272	0.039797	0.083741	0.171406	0.249265
7.8	0.013973	0.013529	0.017448	0.032117	0.070534	0.168917	0.3403	0.507667	0.0101	0.014993	0.012725	0.019883	0.04018	0.084584	0.172686	0.250726
7.9	0.013884	0.013764	0.017811	0.031831	0.07121	0.172535	0.343844	0.514899	0.010313	0.014692	0.012257	0.019728	0.041362	0.085643	0.176172	0.256821
8	0.013811	0.014267	0.018229	0.033037	0.072196	0.175967	0.346133	0.521566	0.009849	0.015024	0.012709	0.020498	0.04173	0.084916	0.177417	0.254908
8.1	0.014414	0.01446	0.018279	0.032998	0.072776	0.177243	0.35391	0.528957	0.01063	0.01514	0.013733	0.020478	0.042352	0.087611	0.180262	0.25851
8.2	0.014074	0.013691	0.018298	0.033187	0.074963	0.178368	0.357442	0.53438	0.009853	0.015399	0.01286	0.021085	0.042023	0.08836	0.179705	0.262391
8.3	0.014143	0.014626	0.019013	0.033524	0.075775	0.181827	0.359986	0.540715	0.010475	0.01492	0.012895	0.021139	0.043689	0.089099	0.184792	0.263578
8.4	0.014557	0.014649	0.018553	0.033527	0.077209	0.185862	0.364891	0.546505	0.010533	0.016312	0.013328	0.021537	0.044609	0.090274	0.185294	0.267327
8.5	0.014503	0.014762	0.018665	0.034076	0.077487	0.186987	0.369305	0.548461	0.010529	0.015504	0.013115	0.021336	0.044281	0.092686	0.189376	0.270338
8.6	0.014174	0.014696	0.019183	0.035673	0.079161	0.188927	0.368926	0.555179	0.010498	0.015794	0.013815	0.021611	0.045433	0.092462	0.190014	0.273651
8.7	0.014023	0.014765	0.019531	0.035568	0.079961	0.190477	0.378365	0.563814	0.01044	0.015948	0.013331	0.022492	0.044853	0.090807	0.191873	0.277157
8.8	0.014858	0.015434	0.019423	0.036071	0.079841	0.195541	0.378288	0.571316	0.010467	0.016377	0.014429	0.022453	0.045154	0.09395	0.194884	0.280488
8.9	0.014584	0.015388	0.019574	0.037393	0.08327	0.195962	0.386405	0.571676	0.010158	0.016478	0.014151	0.022519	0.046863	0.095604	0.198676	0.283341
9	0.013888	0.015422	0.019956	0.037254	0.083177	0.1981	0.38942	0.579012	0.011059	0.016385	0.014193	0.022813	0.046519	0.095446	0.197736	0.285803
9.1	0.015867	0.015488	0.01986	0.037084	0.083061	0.199341	0.38925	0.584574	0.011024	0.016733	0.014112	0.023169	0.047771	0.096648	0.202889	0.285973
9.2	0.01393	0.015855	0.020134	0.03737	0.08487	0.201455	0.399535	0.591551	0.010858	0.016292	0.014773	0.023002	0.048173	0.097676	0.203245	0.286402
9.3	0.014309	0.015631	0.020556	0.037795	0.08477	0.204273	0.398604	0.588494	0.010919	0.016196	0.014939	0.023269	0.047806	0.09899	0.204226	0.292482
9.4	0.014707	0.015786	0.020219	0.038947	0.087692	0.20653	0.403876	0.600047	0.010923	0.015979	0.014135	0.023196	0.048788	0.101715	0.207427	0.295146
9.5	0.0148	0.016087	0.021213	0.038375	0.087336	0.20973	0.404924	0.604341	0.010981	0.016033	0.0148	0.024027	0.048127	0.102442	0.21026	0.298079
9.6	0.01538	0.016567	0.02095	0.03936	0.088824	0.212684	0.413663	0.607859	0.010943	0.016609	0.014843	0.024309	0.04948	0.105132	0.209298	0.300584
9.7	0.014715	0.016145	0.020722	0.037849	0.087243	0.213232	0.413048	0.61036	0.011348	0.016945	0.015148	0.023176	0.049422	0.103702	0.211663	0.301218
9.8	0.014966	0.016818	0.021626	0.03914	0.092365	0.217507	0.422217	0.621171	0.010904	0.017243	0.015075	0.024174	0.051602	0.105317	0.216433	0.308624
9.9	0.01577	0.016582	0.021557	0.040184	0.091812	0.21748	0.4227	0.624074	0.011557	0.016992	0.015948	0.023513	0.050415	0.106423	0.21593	0.306475
10	0.014785	0.01642	0.021545	0.042105	0.093258	0.221697	0.427802	0.626961	0.011403	0.01773	0.015705	0.024931	0.052108	0.105414	0.217372	0.308635
10.1	0.015577	0.016408	0.022117	0.041405	0.092686	0.220975	0.433465	0.636891	0.011279	0.017498	0.01543	0.024282	0.05428	0.108232	0.216356	0.31431
10.2	0.015767	0.016632	0.021626	0.041915	0.093714	0.22145	0.434501	0.643655	0.011677	0.017923	0.015098	0.025743	0.051791	0.10669	0.221922	0.318411
10.3	0.014445	0.016485	0.022755	0.042213	0.096729	0.227395	0.434168	0.64507	0.011113	0.017197	0.015206	0.024568	0.053121	0.110509	0.223077	0.321198
10.4	0.01572	0.016346	0.022879	0.043527	0.095766	0.228299	0.440855	0.647053	0.01141	0.016737	0.01589	0.026118	0.051992	0.108808	0.22397	0.321406
10.5	0.015832	0.017568	0.022307	0.043879	0.096087	0.229861	0.442769	0.650682	0.011209	0.017943	0.015395	0.026361	0.053523	0.1103	0.227426	0.323772
10.6	0.015685	0.016439	0.022875	0.043527	0.097954	0.234105	0.447751	0.657385	0.01189	0.016984	0.015952	0.02485	0.055119	0.112708	0.227642	0.325554
10.7	0.014653	0.016926	0.022925	0.043736	0.097583	0.233011	0.45036	0.660489	0.012237	0.018464	0.015608	0.026937	0.053113	0.112113	0.232721	0.329272
10.8	0.015469	0.016945	0.023087	0.044582	0.098658	0.235755	0.455339	0.663276	0.011959	0.017587	0.016393	0.025855	0.054323	0.113346	0.231817	0.332987
10.9	0.015859	0.017815	0.023683	0.044439	0.101638	0.240301	0.45949	0.673735	0.011522	0.017776	0.015786	0.026597	0.054381	0.114845	0.235052	0.335213
11	0.016369	0.0178	0.024081	0.04556	0.10255	0.239822	0.461627	0.670334	0.012288	0.017773	0.015867	0.026713	0.055691	0.114525	0.235187	0.336535
11.1	0.014796	0.017235	0.023644	0.045854	0.101151	0.241379	0.467379	0.679838	0.011866	0.01766	0.016323	0.026211	0.0567	0.117992	0.236641	0.339075
11.2	0.015125	0.018252	0.023864	0.04454	0.102295	0.242937	0.467657	0.681303	0.011863	0.017197	0.016961	0.027532	0.055637	0.117269	0.240479	0.344552
11.3	0.015415	0.018148	0.024869	0.046785	0.103721	0.248716	0.471163	0.686842	0.012017	0.018441	0.016744	0.027687	0.057871	0.118289	0.24155	0.343199
11.4	0.016188	0.017498	0.024204	0.046584	0.105217	0.250134	0.475925	0.694921	0.011298	0.017313	0.016362	0.026767	0.056901	0.12142	0.241816	0.346179
11.5	0.016033	0.017834	0.024274	0.046809	0.106272	0.251901	0.481433	0.697959	0.011669	0.017653	0.016296	0.028769	0.058316	0.120369	0.243057	0.347605
11.6	0.016176	0.01841	0.024003	0.047083	0.106361	0.24911	0.478553	0.69908	0.012408	0.018055	0.016752	0.028182	0.058254	0.121455	0.245395	0.354354
11.7	0.01613	0.017463	0.024529	0.048556	0.108	0.250934	0.487212	0.704077	0.012222	0.018159	0.016938	0.029009	0.059232	0.121958	0.248175	0.352792
11.8	0.01562	0.017912	0.024591	0.047744	0.108808	0.253864	0.489492	0.706327	0.012257	0.018132	0.017235	0.028653	0.059997	0.122174	0.248426	0.353519
11.9	0.016543	0.018565	0.025024	0.048134	0.106353	0.257695	0.48771	0.712341	0.011646	0.018217	0.017344	0.028642	0.059692	0.124354	0.251638	0.355792
12	0.016103	0.01848	0.024931	0.049058	0.109059	0.263191	0.493624	0.712608	0.012102	0.017525	0.01749	0.02822	0.059583	0.124555	0.250865	0.355116
12.1	0.015778	0.018372	0.025503	0.048687	0.11156	0.260845	0.494838	0.717618	0.012106	0.018024	0.017313	0.028839	0.060113	0.127887	0.253814	0.35999
12.2	0.015913	0.018766	0.026311	0.049901	0.113589	0.260745	0.49875	0.71967	0.012481	0.018623	0.017042	0.028607	0.061149	0.126913	0.256396	0.360964
12.3	0.015264	0.018727	0.025762	0.050829	0.112955	0.266392	0.503218	0.723164	0.012203	0.01945	0.017529	0.02771	0.062668	0.128026	0.258711	0.366615
12.4	0.016176	0.018337	0.025437	0.049897	0.113856	0.267053	0.506987	0.729921	0.011588	0.018607	0.017274	0.02904	0.061064	0.129363	0.258823	0.36927
12.5	0.015952	0.017653	0.025596	0.049758	0.113284	0.268452	0.506499	0.735104	0.012009	0.018588	0.017402	0.028769	0.062707	0.129244	0.262287	0.367349
12.6	0.015948	0.018287	0.026485	0.051018	0.116098	0.269998	0.508486	0.739004	0.012651	0.018948	0.016574	0.03037	0.061613	0.131281	0.262306	0.372053
12.7	0.01584	0.018604	0.025924	0.051706	0.116867	0.271076	0.516619	0.740608	0.012446	0.01904	0.017541	0.029825	0.062258	0.13031	0.263725	0.373839
12.8	0.015983	0.01872	0.026999	0.051188	0.118649	0.270833	0.517728	0.742935	0.012609	0.017846	0.017378	0.029786	0.062931	0.130937	0.266813	0.376147
12.9	0.016037	0.01858	0.02696	0.052069	0.117547	0.276356	0.520971	0.746681	0.012195	0.017885	0.017966	0.030343	0.061203	0.131138	0.26783	0.376912
13	0.015774	0.018588	0.026705	0.051748	0.117107	0.277172	0.530615	0.751733	0.012477	0.019384	0.018287	0.030915	0.063429	0.132746	0.268842	0.380182
13.1	0.016408	0.018673	0.025982	0.053012	0.117992	0.280813	0.526046	0.752734	0.012643	0.018901	0.018325	0.030389	0.065273	0.135069	0.266685	0.382752
13.2	0.017429	0.019717	0.027092	0.053979	0.118614	0.27781	0.529297	0.756672	0.012582	0.018731	0.018364	0.029442	0.065895	0.135842	0.269778	0.385601
13.3	0.015848	0.018561	0.027181	0.052765	0.120516	0.284941	0.531168	0.764492	0.012512	0.01887	0.017715	0.030969	0.063974	0.133492	0.273291	0.386869
13.4	0.016176	0.018681	0.02708	0.054021	0.122251	0.284137	0.534272	0.768477	0.011913	0.019013	0.018171	0.03018	0.06479	0.133762	0.276221	0.384399
13.5	0.016849	0.01952	0.027803	0.054732	0.123546	0.282738	0.537658	0.772702	0.012779	0.019701	0.017846	0.032136	0.065374	0.136615	0.275425	0.38843
13.6	0.016733	0.01923	0.027575	0.054122	0.123504	0.285536	0.539088	0.774615	0.012241	0.018607	0.018148	0.031463	0.064616	0.13774	0.278962	0.388945
13.7	0.016829	0.018866	0.028483	0.053399	0.125923	0.284887	0.538933	0.774217	0.01235	0.019311	0.018781	0.031433	0.067179	0.140499	0.277775	0.391094
13.8	0.016482	0.019326	0.027645	0.055266	0.124961	0.290523	0.54177	0.780722	0.011519	0.019098	0.017908	0.032113	0.066089	0.139247	0.276685	0.398662
13.9	0.016346	0.019883	0.027614	0.055332	0.12595	0.293317	0.545875	0.783876	0.01291	0.018836	0.018383	0.032306	0.068381	0.138802	0.281497	0.399481
14	0.016265	0.019493	0.028665	0.054903	0.127956	0.293731	0.553308	0.782856	0.012071	0.01962	0.019075	0.031409	0.066255	0.140727	0.28057	0.397916
14.1	0.016215	0.019187	0.028912	0.056066	0.128521	0.293889	0.549791	0.791224	0.012276	0.019481	0.018851	0.031719	0.066437	0.14128	0.28222	0.399814
14.2	0.016284	0.019168	0.028978	0.057113	0.128702	0.297673	0.552496	0.794231	0.012551	0.019524	0.018553	0.032175	0.068794	0.142552	0.285834	0.400417
14.3	0.01664	0.01974	0.028197	0.057786	0.127396	0.299579	0.555013	0.792728	0.012477	0.018206	0.018808	0.03209	0.068562	0.143093	0.285927	0.40427
14.4	0.016737	0.019701	0.029187	0.05743	0.129696	0.298095	0.562739	0.805781	0.012663	0.019207	0.018406	0.032495	0.068829	0.144554	0.289595	0.409458
14.5	0.016165	0.019895	0.028193	0.057477	0.12815	0.302126	0.564216	0.800694	0.012342	0.019067	0.018673	0.032202	0.068435	0.145528	0.289715	0.411514
14.6	0.016806	0.019875	0.02851	0.05898	0.131153	0.300414	0.5649	0.804989	0.013212	0.019717	0.018998	0.033315	0.069196	0.145837	0.288524	0.411734
14.7	0.016652	0.019021	0.029291	0.057214	0.132351	0.302397	0.566145	0.811884	0.013277	0.01969	0.018932	0.033176	0.070105	0.145474	0.29409	0.410706
14.8	0.016296	0.020451	0.028816	0.058605	0.133492	0.307878	0.566717	0.804691	0.0124	0.018611	0.018635	0.033902	0.069993	0.148361	0.292776	0.414958
14.9	0.015531	0.020474	0.030118	0.059077	0.13203	0.308295	0.570945	0.810473	0.012616	0.019887	0.019284	0.032967	0.072014	0.149038	0.293279	0.411541
15	0.01715	0.019945	0.030111	0.058969	0.133457	0.310746	0.576654	0.818231	0.012609	0.018843	0.018673	0.033207	0.069521	0.149432	0.296413	0.415236
15.1	0.016748	0.020208	0.029446	0.059069	0.135096	0.311287	0.579519	0.819271	0.012149	0.019466	0.019326	0.033717	0.072064	0.148937	0.295779	0.416635
15.2	0.016605	0.020981	0.030443	0.059811	0.136603	0.311519	0.581447	0.821814	0.012926	0.020243	0.018774	0.034293	0.071202	0.148968	0.301052	0.41919
15.3	0.016431	0.02044	0.030211	0.060461	0.135509	0.3132	0.580555	0.818695	0.013177	0.020084	0.018967	0.033937	0.072316	0.149216	0.300797	0.4242
15.4	0.016451	0.020509	0.030601	0.060229	0.137117	0.316405	0.582278	0.822336	0.012705	0.019361	0.019125	0.034532	0.073761	0.151071	0.300167	0.423635
15.5	0.016984	0.020057	0.030663	0.060921	0.137813	0.315581	0.585637	0.832633	0.013699	0.018948	0.018306	0.035325	0.073955	0.152339	0.302122	0.425112
15.6	0.016277	0.020335	0.030976	0.060411	0.136429	0.320973	0.587373	0.835648	0.013339	0.019651	0.018797	0.034648	0.073595	0.152482	0.305586	0.425545
15.7	0.015929	0.020652	0.03047	0.061102	0.138787	0.321263	0.591138	0.833309	0.012156	0.019686	0.019071	0.034169	0.073359	0.154217	0.303305	0.428181
15.8	0.017139	0.020637	0.030833	0.063047	0.138567	0.318287	0.595219	0.829069	0.013556	0.020018	0.020559	0.034791	0.072992	0.15373	0.304272	0.430349
15.9	0.017351	0.021464	0.03098	0.060952	0.141064	0.321252	0.593867	0.836089	0.012721	0.019678	0.019075	0.035518	0.074492	0.154704	0.308717	0.431219
16	0.016416	0.020266	0.031328	0.062641	0.139204	0.322438	0.596831	0.84157	0.012288	0.019771	0.020018	0.034842	0.073576	0.155848	0.306409	0.434505
16.1	0.015998	0.021441	0.031691	0.061033	0.141953	0.324228	0.59365	0.840839	0.012636	0.019667	0.019315	0.035793	0.074484	0.158241	0.30748	0.43212
16.2	0.016961	0.021027	0.03052	0.062486	0.141829	0.32257	0.6046	0.847584	0.012883	0.020173	0.019612	0.03568	0.075311	0.157472	0.307743	0.434729
16.3	0.016783	0.020559	0.032055	0.063669	0.141632	0.32516	0.602235	0.850437	0.013007	0.02037	0.021275	0.035155	0.076127	0.158284	0.31189	0.436851
16.4	0.01669	0.020297	0.031862	0.063677	0.143634	0.326319	0.602258	0.846324	0.013594	0.019446	0.019926	0.035735	0.076896	0.158546	0.316068	0.440453
16.5	0.016536	0.020455	0.031777	0.063692	0.144167	0.32928	0.607681	0.855137	0.013285	0.019794	0.020331	0.035568	0.076695	0.158372	0.314383	0.435239
16.6	0.016849	0.021209	0.031301	0.062672	0.145056	0.333172	0.609583	0.859265	0.012868	0.019589	0.019848	0.035062	0.077174	0.16109	0.314441	0.442444
16.7	0.016717	0.021534	0.032391	0.06336	0.14414	0.334711	0.611763	0.856273	0.01281	0.019887	0.02037	0.036133	0.07792	0.160127	0.317274	0.441338
16.8	0.017313	0.021186	0.030385	0.063085	0.145729	0.335306	0.618388	0.860077	0.013474	0.020076	0.021139	0.035909	0.076227	0.161832	0.316613	0.443627
16.9	0.016945	0.02112	0.032376	0.065567	0.146684	0.335039	0.612076	0.857842	0.013625	0.020416	0.020996	0.03645	0.078036	0.162369	0.32095	0.447635
17	0.016702	0.020807	0.032565	0.065578	0.148759	0.336284	0.613552	0.863003	0.012972	0.020026	0.020641	0.036635	0.077124	0.162172	0.317989	0.451199
17.1	0.01659	0.021723	0.033667	0.065463	0.14651	0.337803	0.623734	0.86054	0.012883	0.019187	0.020664	0.036546	0.077696	0.16325	0.318418	0.451268
17.2	0.017088	0.020989	0.032507	0.065176	0.148585	0.33948	0.618763	0.866779	0.012585	0.020815	0.02042	0.037153	0.078767	0.165469	0.324684	0.451705
17.3	0.017007	0.020691	0.031699	0.065196	0.150936	0.338305	0.622261	0.871553	0.012713	0.019991	0.020903	0.036821	0.078732	0.162991	0.326265	0.454662
17.4	0.016899	0.020486	0.032364	0.066885	0.148632	0.343156	0.623026	0.875256	0.013733	0.019288	0.019539	0.037652	0.078898	0.166888	0.324012	0.453607
17.5	0.016725	0.02129	0.033458	0.067639	0.149726	0.341023	0.625724	0.869315	0.013401	0.020683	0.021495	0.036743	0.079347	0.166145	0.327185	0.457801
17.6	0.017278	0.021232	0.03345	0.06622	0.14956	0.344772	0.629543	0.878205	0.013057	0.019392	0.021267	0.038541	0.079246	0.164309	0.326454	0.454674
17.7	0.016207	0.021727	0.033002	0.066595	0.150367	0.345611	0.634672	0.878359	0.013227	0.020447	0.020223	0.036948	0.08138	0.168681	0.327142	0.460572
17.8	0.016111	0.02112	0.032851	0.067051	0.152551	0.347296	0.634649	0.881057	0.013389	0.021012	0.020358	0.03786	0.08058	0.16625	0.329156	0.462864
17.9	0.017231	0.021089	0.033214	0.067113	0.152006	0.34638	0.632403	0.877803	0.013266	0.021325	0.019632	0.036179	0.080947	0.164692	0.331344	0.462489
18	0.016725	0.020842	0.034262	0.067874	0.151902	0.353821	0.633803	0.887076	0.01308	0.019783	0.022322	0.038154	0.080839	0.1687	0.330428	0.461395
18.1	0.016339	0.02146	0.034273	0.067894	0.153007	0.346786	0.638302	0.885618	0.013567	0.020273	0.021858	0.037261	0.081855	0.167178	0.332187	0.465817
18.2	0.016362	0.021591	0.033806	0.067886	0.153579	0.350191	0.640752	0.89268	0.013644	0.020664	0.021213	0.037779	0.080997	0.169605	0.335936	0.469308
18.3	0.016841	0.021765	0.033976	0.06818	0.156424	0.351026	0.640575	0.886786	0.013196	0.019288	0.020297	0.038402	0.080479	0.171286	0.335619	0.469389
18.4	0.015944	0.022024	0.033473	0.068072	0.157742	0.354107	0.640366	0.891072	0.013099	0.020181	0.021124	0.039407	0.081967	0.171669	0.334865	0.470038
18.5	0.016822	0.02197	0.034683	0.067329	0.153939	0.355684	0.640992	0.893121	0.012991	0.020529	0.021862	0.03907	0.082014	0.172724	0.337849	0.471217
18.6	0.016961	0.02059	0.034629	0.069022	0.159385	0.356325	0.654764	0.894431	0.013096	0.020169	0.021847	0.039016	0.081975	0.173323	0.336748	0.470239
18.7	0.017819	0.021441	0.035522	0.068168	0.156853	0.356557	0.647865	0.894969	0.013498	0.020413	0.021302	0.039592	0.081229	0.174413	0.33737	0.47034
18.8		0.021591	0.034745	0.068381	0.155976	0.359174	0.652039	0.898544	0.012802	0.019763	0.021773	0.039932	0.083796	0.172705	0.336319	0.471476
18.9		0.021715	0.034262	0.069088	0.156366	0.357087	0.654772	0.898215	0.013219	0.020923	0.020652	0.038618	0.083741	0.173826	0.341684	0.473896
19		0.02228	0.035182	0.070777	0.158295	0.358822	0.654184	0.904346	0.013227	0.020378	0.021236	0.039182	0.082068	0.177034	0.344312	0.475442
19.1		0.022183	0.033933	0.070936	0.159729	0.356754	0.654706	0.905896	0.013242	0.021077	0.021677	0.038769	0.084356	0.175507	0.343701	0.479524
19.2		0.021247	0.035251	0.071373	0.158709	0.362212	0.657632	0.908984	0.013277	0.020784	0.021758	0.039356	0.085315	0.176883	0.344501	0.480386
19.3		0.021951	0.03425	0.071376	0.159424	0.362286	0.653543	0.910484	0.013142	0.020304	0.02136	0.040002	0.086231	0.176535	0.345819	0.480811
19.4		0.021657	0.034981	0.071349	0.160278	0.363507	0.663001	0.910066	0.013378	0.019783	0.022152	0.040064	0.085342	0.177946	0.348819	0.480482
19.5		0.022094	0.034753	0.07184	0.159107	0.363986	0.663318	0.91043	0.013053	0.020567	0.021228	0.0396	0.08475	0.174839	0.346063	0.4818
19.6		0.022129	0.034718	0.07167	0.160842	0.366684	0.660284	0.914048	0.013815	0.020811	0.021808	0.038827	0.087259	0.181591	0.347806	0.489415
19.7		0.022082	0.034996	0.072729	0.164681	0.369274	0.665858	0.918535	0.012837	0.020559	0.022222	0.040856	0.085639	0.18003	0.348552	0.487274
19.8		0.022063	0.036535	0.071079	0.161689	0.369738	0.667315	0.913054	0.013169	0.021244	0.021773	0.040775	0.086358	0.179651	0.352908	0.486211
19.9		0.022249	0.035773	0.070963	0.16572	0.367511	0.66767	0.915887	0.013026	0.020927	0.02122	0.041428	0.085245	0.181842	0.350883	0.487679
20		0.021993	0.034838	0.072787	0.162984	0.369603	0.670778	0.918048	0.013161	0.020119	0.021375	0.04062	0.087812	0.180919	0.354149	0.489662
20.1		0.022542	0.035893	0.072068	0.163258	0.370967	0.670519	0.915706	0.013865	0.020297	0.022283	0.040323	0.085952	0.18192	0.350392	0.491054
20.2		0.022241	0.035534	0.072644	0.164541	0.37329	0.67089	0.919799	0.013629	0.021004	0.021487	0.041034	0.089601	0.183512	0.352878	0.489902
20.3		0.021425	0.035588	0.072915	0.16448	0.373143	0.673588	0.924345	0.013285	0.020931	0.02226	0.040759	0.086996	0.183164	0.353709	0.489469
20.4		0.022739	0.035673	0.074047	0.164453	0.377202	0.674141	0.922938	0.013069	0.020757	0.022148	0.041904	0.088654	0.182747	0.354145	0.497196
20.5		0.022481	0.036689	0.072868	0.166088	0.373657	0.674029	0.925458	0.012956	0.020181	0.022148	0.041981	0.087533	0.184231	0.358358	0.493114
20.6		0.023103	0.036225	0.074183	0.165848	0.374689	0.673298	0.927963	0.013057	0.021132	0.022813	0.041304	0.088403	0.1842	0.355514	0.495495
20.7		0.022453	0.036268	0.072339	0.166354	0.378582	0.67871	0.926459	0.012864	0.020996	0.023107	0.042004	0.087665	0.18444	0.36016	0.498162
20.8		0.022836	0.036322	0.075404	0.167904	0.377758	0.67835	0.932779	0.013834	0.020451	0.022326	0.042031	0.088902	0.183454	0.35924	0.499627
20.9		0.02279	0.036287	0.075578	0.167143	0.37736	0.683313	0.929799	0.013069	0.020324	0.022337	0.042445	0.090595	0.186477	0.361965	0.497938
21		0.022341	0.037493	0.074971	0.169122	0.379672	0.686695	0.933486	0.013544	0.020946	0.0225	0.042228	0.08879	0.188251	0.357524	0.499418
21.1		0.02216	0.036113	0.074484	0.167007	0.381434	0.687739	0.936022	0.013679	0.020911	0.022886	0.042081	0.089512	0.189503	0.36137	0.5034
21.2		0.02301	0.036086	0.074813	0.167607	0.379749	0.68649	0.941275	0.013579	0.021	0.022013	0.043071	0.090127	0.186187	0.365273	0.502634
21.3		0.022229	0.038332	0.074221	0.169879	0.384198	0.685598	0.938851	0.013977	0.021066	0.022821	0.041687	0.089794	0.186566	0.363016	0.499094
21.4		0.022604	0.036167	0.074828	0.170958	0.384368	0.691705	0.937212	0.013335	0.020316	0.023636	0.042967	0.089369	0.186423	0.364319	0.502874
21.5		0.022612	0.037586	0.075331	0.169524	0.380452	0.690043	0.93901	0.013378	0.02107	0.022566	0.042383	0.090305	0.188406	0.365103	0.506461
21.6		0.023022	0.038011	0.076509	0.169818	0.381314	0.689262	0.947011	0.013467	0.021155	0.02243	0.04217	0.090711	0.190265	0.36721	0.503307
21.7		0.02342	0.03846	0.076834	0.171093	0.383089	0.691075	0.943466	0.01327	0.021027	0.023458	0.041451	0.091843	0.191239	0.367167	0.503914
21.8		0.021499	0.036712	0.074248	0.169914	0.386811	0.691113	0.94405	0.01361	0.02124	0.022763	0.04343	0.091194	0.190551	0.367937	0.506778
21.9		0.023192	0.037246	0.077151	0.169771	0.384341	0.691728	0.943544	0.013552	0.020826	0.023362	0.042603	0.090386	0.193106	0.370573	0.505417
22		0.023269	0.036635	0.076115	0.173405	0.389223	0.69615	0.940799	0.014232	0.020127	0.023037	0.043651	0.090722	0.191966	0.368064	0.50762
22.1		0.023122	0.037439	0.07717	0.171066	0.386819	0.695079	0.945758	0.013675	0.020308	0.023412	0.043013	0.091661	0.193454	0.373843	0.514145
22.2		0.022511	0.037516	0.077294	0.172465	0.389474	0.692683	0.946868	0.013799	0.021383	0.022832	0.04362	0.091716	0.192971	0.370445	0.512328
22.3		0.023033	0.038703	0.076587	0.176748	0.392029	0.69661	0.944518	0.014004	0.020772	0.023636	0.043921	0.093907	0.195471	0.372602	0.51423
22.4		0.02233	0.037687	0.076911	0.174073	0.391202	0.699659	0.950084	0.013668	0.021495	0.022523	0.042885	0.09383	0.193717	0.371044	0.515107
22.5		0.023447	0.037547	0.078473	0.175295	0.391766	0.700862	0.949608	0.013157	0.020351	0.024313	0.044246	0.093563	0.1912	0.373661	0.517604
22.6		0.022434	0.038835	0.078164	0.175291	0.392234	0.701963	0.953644	0.013807	0.02139	0.023733	0.043102	0.090838	0.196001	0.37617	0.518177
22.7		0.022983	0.038305	0.078187	0.176651	0.390889	0.701414	0.956206	0.013428	0.020718	0.023362	0.042824	0.092353	0.195421	0.371709	0.517577
22.8		0.023257	0.03892	0.078013	0.177799	0.390058	0.702075	0.95478	0.013038	0.021309	0.023733	0.043828	0.095105	0.195448	0.377716	0.518706
22.9		0.023165	0.038703	0.077944	0.178174	0.394105	0.707545	0.952658	0.013973	0.020938	0.022739	0.043226	0.09383	0.196639	0.378048	0.515092
23		0.022511	0.038208	0.078191	0.175012	0.395964	0.709222	0.953559	0.013227	0.020571	0.024158	0.044544	0.092809	0.19873	0.37593	0.514798
23.1		0.023895	0.038081	0.08027	0.176528	0.397243	0.708047	0.9557	0.013873	0.020343	0.023984	0.044165	0.0955	0.200473	0.374581	0.520233
23.2		0.023922	0.038456	0.080371	0.176385	0.399122	0.702369	0.957277	0.013529	0.020896	0.024027	0.044648	0.095326	0.198703	0.381836	0.517639
23.3		0.02279	0.038819	0.080081	0.178816	0.400177	0.708426	0.958904	0.013598	0.020517	0.024112	0.045293	0.096984	0.199012	0.382497	0.522587
23.4		0.023443	0.039325	0.078029	0.178665	0.397846	0.706942	0.961625	0.013459	0.020351	0.023594	0.045359	0.095716	0.198591	0.379865	0.526212
23.5		0.023254	0.039704	0.079331	0.180644	0.39991	0.709164	0.96263	0.013807	0.020942	0.023482	0.044296	0.095778	0.201571	0.377039	0.523039
23.6		0.023505	0.038823	0.079177	0.178866	0.399303	0.713965	0.962174	0.014128	0.021132	0.02354	0.046229	0.095979	0.202757	0.378122	0.529301
23.7		0.022554	0.039163	0.079892	0.180115	0.403277	0.713895	0.962286	0.013637	0.021166	0.024421	0.04529	0.096551	0.202657	0.383931	0.525579
23.8		0.02267	0.039287	0.080255	0.180513	0.399624	0.708461	0.958916	0.014155	0.021139	0.024487	0.044424	0.097769	0.202143	0.383232	0.529915
23.9		0.022944	0.038761	0.079095	0.182194	0.400506	0.710169	0.965251	0.013413	0.021166	0.022867	0.046229	0.096273	0.201169	0.388508	0.529498
24		0.023876	0.03885	0.080939	0.180687	0.405801	0.711762	0.963972	0.013602	0.020768	0.023826	0.045023	0.096996	0.201196	0.385597	0.528253
24.1		0.023725	0.04081	0.080073	0.178313	0.40146	0.715434	0.96125	0.013772	0.020965	0.024374	0.04626	0.096559	0.200307	0.386714	0.531032
24.2		0.022917	0.038985	0.080595	0.18226	0.408136	0.712589	0.960659	0.013915	0.021789	0.02386	0.045456	0.096965	0.203237	0.386231	0.526437
24.3		0.023029	0.039812	0.080661	0.182515	0.406246	0.717907	0.962298	0.013343	0.0217	0.023938	0.045417	0.099744	0.201188	0.387599	0.53036
24.4		0.024668	0.039325	0.081701	0.182098	0.405484	0.718395	0.968158	0.013702	0.020099	0.02422	0.044721	0.098542	0.205425	0.388376	0.53397
24.5		0.023945	0.040114	0.08281	0.183207	0.405967	0.720571	0.967342	0.013297	0.021089	0.024336	0.046453	0.09703	0.203407	0.390212	0.531581
24.6		0.022948	0.040126	0.080696	0.184281	0.406172	0.715345	0.967624	0.013219	0.021333	0.023984	0.045406	0.098294	0.205525	0.390665	0.534743
24.7		0.02323	0.040844	0.081252	0.183752	0.40504	0.71943	0.972862	0.013463	0.021112	0.024259	0.046221	0.098433	0.205119	0.391488	0.537043
24.8		0.023729	0.040156	0.082292	0.184154	0.405929	0.719025	0.975196	0.013876	0.021352	0.024243	0.047087	0.098155	0.206549	0.394607	0.534264
24.9		0.023868	0.04069	0.082079	0.18357	0.407401	0.723462	0.967713	0.013911	0.021317	0.024742	0.047195	0.098654	0.206859	0.398206	0.536428
25		0.024487	0.039488	0.080723	0.186005	0.411498	0.72098	0.976534	0.01407	0.021568	0.024347	0.045985	0.100977	0.206696	0.392133	0.536738
25.1		0.023895	0.039279	0.083258	0.185101	0.411178	0.724003	0.972336	0.013857	0.020544	0.023872	0.045742	0.099164	0.207029	0.390873	0.538133
25.2		0.022836	0.039685	0.082076	0.187946	0.412198	0.720926	0.975316	0.013196	0.020602	0.024123	0.046364	0.099717	0.209649	0.393641	0.541708
25.3		0.024127	0.040288	0.084348	0.187316	0.414135	0.727049	0.978119	0.013447	0.020776	0.024139	0.046901	0.100783	0.20975	0.399218	0.542021
25.4		0.023837	0.04137	0.084333	0.185255	0.410903	0.727474	0.978679	0.013096	0.021684	0.023918	0.047415	0.099782	0.20934	0.391584	0.544681
25.5		0.023837	0.039534	0.083378	0.188413	0.411112	0.725785	0.969031	0.013556	0.020853	0.024425	0.046055	0.10107	0.210426	0.394576	0.542771
25.6		0.023501	0.039646	0.083506	0.18742	0.415974	0.732642	0.969785	0.013815	0.021719	0.023362	0.047968	0.100826	0.209375	0.396756	0.542365
25.7		0.023528	0.040392	0.083962	0.188545	0.413845	0.728433	0.974508	0.014139	0.021591	0.024328	0.046851	0.100014	0.209692	0.393212	0.542663
25.8		0.024347	0.041486	0.08366	0.186415	0.419156	0.731803	0.976058	0.012914	0.02078	0.024637	0.046851	0.101247	0.210364	0.400343	0.546675
25.9		0.023273	0.040307	0.084572	0.186106	0.416121	0.732043	0.984156	0.014232	0.020973	0.024858	0.046867	0.099968	0.209939	0.400007	0.546331
26		0.024034	0.041536	0.082841	0.190787	0.416956	0.732607	0.976051	0.013443	0.021758	0.024201	0.048819	0.103265	0.209866	0.398917	0.546204
26.1		0.023242	0.041065	0.083691	0.190284	0.415484	0.730501	0.980805	0.013757	0.021673	0.025321	0.046662	0.102364	0.2122	0.400463	0.548724
26.2		0.024545	0.040323	0.085029	0.189202	0.420335	0.728985	0.976669	0.013757	0.021561	0.024765	0.047357	0.102248	0.211304	0.406033	0.547545
26.3		0.024289	0.040249	0.085921	0.188962	0.422731	0.733651	0.978868	0.014367	0.021186	0.025917	0.047512	0.10214	0.211988	0.400877	0.551712
26.4		0.024015	0.040779	0.084356	0.190721	0.420006	0.734934	0.983275	0.013672	0.021561	0.024954	0.047922	0.102426	0.21375	0.405527	0.55175
26.5		0.024664	0.0404	0.084592	0.18972	0.419461	0.730582	0.987237	0.014332	0.022156	0.0256	0.047678	0.103192	0.215985	0.401445	0.550231
26.6		0.023505	0.040524	0.084627	0.191981	0.424714	0.738146	0.980542	0.014224	0.021881	0.025561	0.048533	0.101843	0.211617	0.402585	0.553378
26.7		0.023934	0.04079	0.085504	0.190168	0.424826	0.736612	0.976545	0.01388	0.021182	0.024916	0.047771	0.102631	0.21554	0.406937	0.549914
26.8		0.023335	0.040609	0.085369	0.190845	0.423844	0.733233	0.977199	0.013869	0.021448	0.025754	0.048525	0.103029	0.215795	0.405639	0.555279
26.9		0.023694	0.041026	0.086068	0.193879	0.425328	0.734578	0.988845	0.014108	0.021669	0.025561	0.048131	0.103984	0.217067	0.407741	0.558743
27		0.024823	0.041158	0.086552	0.191734	0.42166	0.73517	0.983155	0.01359	0.021282	0.026207	0.046859	0.104614	0.213665	0.407467	0.557197
27.1		0.023961	0.041625	0.085767	0.192294	0.426078	0.737787	0.983182	0.01439	0.020996	0.024587	0.048718	0.105677	0.216417	0.40705	0.549914
27.2		0.024243	0.041865	0.08683	0.194667	0.428274	0.740833	0.988887	0.013436	0.021023	0.025584	0.050473	0.105001	0.216294	0.411008	0.555921
27.3		0.024058	0.041417	0.087	0.192062	0.425642	0.734064	0.98702	0.014209	0.0217	0.025855	0.04815	0.103934	0.218895	0.41243	0.553687
27.4		0.024034	0.041517	0.086609	0.193114	0.42214	0.741435	0.983066	0.014166	0.021437	0.025345	0.048691	0.104939	0.217964	0.407718	0.558797
27.5		0.024174	0.041927	0.086695	0.192232	0.427818	0.737427	0.984578	0.014066	0.022399	0.024355	0.048467	0.10558	0.217909	0.411232	0.56003
27.6		0.023973	0.040276	0.087112	0.193203	0.42742	0.741609	0.986595	0.014217		0.025623	0.050067	0.10546	0.219722	0.408294	0.555303
27.7		0.023992	0.041795	0.086621	0.195715	0.424463	0.740751	0.985397	0.013726		0.025534	0.048927	0.103551	0.218775	0.411603	0.559133
27.8		0.024069	0.040957	0.087228	0.193891	0.430009	0.738382	0.985486	0.013919		0.025608	0.049182	0.104394	0.220909	0.412635	0.556764
27.9		0.024726	0.041857	0.085933	0.194343	0.428146	0.740771	0.982966	0.013915		0.025519	0.049267	0.105812	0.219993	0.4156	0.562565
28		0.024804	0.041706	0.087151	0.19258	0.428038	0.744957	0.988261	0.013865		0.025955	0.049333	0.105646	0.220043	0.411038	0.557931
28.1		0.023911	0.042275	0.08821	0.19522	0.428738	0.743519	0.988536	0.013378		0.02577	0.049286	0.105789	0.222938	0.414057	0.563354
28.2		0.024483	0.043461	0.087073	0.197234	0.431134	0.742692	0.985467	0.014074		0.024997	0.049541	0.107787	0.219792	0.411174	0.562647
28.3		0.025182	0.042522	0.087529	0.196616	0.429337	0.742363	0.993626	0.014464		0.025321	0.049696	0.106925	0.221605	0.413346	0.564881
28.4		0.024688	0.042286	0.086884	0.195046	0.430635	0.745656	0.990766	0.013884		0.026098	0.049951	0.10606	0.222157	0.413872	0.564788
28.5		0.024939	0.042023	0.089215	0.195267	0.433283	0.748165	0.983039	0.014854		0.026786	0.049781	0.106786	0.221373	0.412128	0.564011
28.6		0.024645	0.042031	0.089122	0.197617	0.431459	0.741312	0.993483			0.025785	0.050674	0.108046	0.22215	0.416318	0.56618
28.7		0.024966	0.042866	0.087634	0.200172	0.432015	0.746112	0.987449			0.02587	0.050318	0.106605	0.221779	0.417714	0.567641
28.8		0.024819	0.042058	0.089412	0.196828	0.432634	0.748115	0.991195			0.024896	0.050326	0.108541	0.224824	0.414749	0.56904
28.9		0.024572	0.042437	0.089141	0.198065	0.433728	0.743658	0.986622			0.025302	0.05028	0.106968	0.225052	0.41691	0.569635
29		0.023775	0.042905	0.088206	0.199785	0.436147	0.745772	0.996784			0.026497	0.049773	0.107192	0.226997	0.415082	0.567308
29.1		0.024336	0.042487	0.08896	0.198367	0.433376	0.746325	0.988273			0.026118	0.05033	0.108147	0.224024	0.419125	0.568421
29.2		0.024521	0.042089	0.087823	0.197134	0.432197	0.747253	0.988853			0.026632	0.051072	0.107633	0.224813	0.418433	0.569824
29.3		0.024201	0.04287	0.088531	0.199043	0.433693	0.746356	0.989483			0.025542	0.050774	0.109403	0.224024	0.42023	0.570992
29.4		0.024266	0.043585	0.090664	0.199518	0.438729	0.74508	0.987991			0.026717	0.050496	0.108359	0.226575	0.419318	0.570331
29.5		0.025302	0.042808	0.087413	0.198131	0.435274	0.746561	0.992559			0.026156	0.051416	0.108591	0.224558	0.420153	0.570814
29.6		0.024243	0.042325	0.087812	0.200554	0.436948	0.748505	0.986417			0.026674	0.050338	0.109987	0.225482	0.42093	0.571517
29.7		0.024587	0.042769	0.090224	0.201428	0.437357	0.75101	0.989162			0.024966	0.051014	0.111537	0.227762	0.419755	0.574695
29.8		0.024293	0.042228	0.088905	0.199364	0.435571	0.751713	0.997078			0.025457	0.050566		0.227495	0.427416
29.9		0.023443	0.043369	0.090262	0.198989	0.434953	0.754075	0.98934			0.025229	0.050801		0.225331	0.422182
30		0.024854	0.044459	0.090668	0.202097	0.440264		0.997167			0.02594	0.052247		0.22886	0.423183
30.1		0.025743		0.091515	0.203105	0.435463		1			0.026153			0.230557	0.426848
30.2					0.202692	0.442943					0.026953				0.424478
30.3					0.203372										0.427172
30.4															0.43028

## Sheet: secondary data
PCP-pep86-DHFR (nM)	-MTX	+MTX
0.15625	0.0213269	0.0134516
0.3125	0.0247348	0.0208118
0.625	0.0531202	0.0387598
1.25	0.11225	0.0674315
2.5	0.240964	0.146858
5	0.497852	0.299503
10	0.818981	0.503424
20	1.06931	0.649977
