# Supplementary material for: Towards a molecular mechanism underlying mitochondrial protein import through the TOM and TIM23 complexes
Source: eLife. 2022 Jun 8;11:e75426. doi: 10.7554/eLife.75426 (PMC9255969; doi:10.7554/eLife.75426)
Supplement: Figure 3—figure supplement 1—source data 1. [file elife-75426-fig3-figsupp1-data1.xlsx]

## Sheet: L n=1
x correct	19	17.2667	15.5333	13.8	12.0666	10.3333	8.59996	6.86662
time	100	169.381	286.901	485.956	823.119	1394.21	2361.53	4000
0	0.0203274	0.0221248	0.0205185	0.0231877	0.0190129	0.0196299	0.0155356	0.0167596
0.1	0.0343407	0.0382069	0.036594	0.0412986	0.0339383	0.0375162	0.0293208	0.0306387
0.2	0.0513416	0.0576256	0.0563849	0.0624711	0.055949	0.0601842	0.0507515	0.0511639
0.3	0.0733155	0.080421	0.0813029	0.0874059	0.0811286	0.0832042	0.0738386	0.0774165
0.4	0.0980927	0.105899	0.106395	0.115439	0.105869	0.112663	0.100051	0.105034
0.5	0.122638	0.133278	0.135317	0.1459	0.135984	0.138774	0.126756	0.134834
0.6	0.149008	0.160041	0.16214	0.172501	0.16448	0.168568	0.158428	0.159762
0.7	0.17564	0.186776	0.193818	0.202426	0.197252	0.197812	0.183718	0.189439
0.8	0.200129	0.212885	0.220325	0.230308	0.225077	0.225355	0.214605	0.217177
0.9	0.227756	0.241297	0.252879	0.259904	0.256262	0.253355	0.242115	0.248603
1	0.255189	0.271774	0.278243	0.28955	0.280479	0.28172	0.266335	0.276643
1.1	0.277837	0.294288	0.304673	0.317519	0.309116	0.309448	0.293453	0.300777
1.2	0.303127	0.319565	0.331117	0.340469	0.334722	0.333149	0.319186	0.324498
1.3	0.326335	0.346294	0.359371	0.3682	0.361732	0.357889	0.341784	0.349908
1.4	0.350438	0.37099	0.384799	0.39443	0.387763	0.379719	0.365813	0.373851
1.5	0.374552	0.392451	0.401894	0.415186	0.407658	0.402685	0.388159	0.397162
1.6	0.395238	0.413094	0.430125	0.436791	0.438163	0.423683	0.411011	0.424673
1.7	0.413332	0.43662	0.447756	0.462715	0.456777	0.445215	0.432502	0.439538
1.8	0.431731	0.460093	0.469479	0.483569	0.472373	0.465109	0.448229	0.462034
1.9	0.450184	0.474049	0.484786	0.495845	0.491593	0.48486	0.470807	0.480125
2	0.472158	0.494383	0.506535	0.517427	0.516461	0.50497	0.489991	0.503226
2.1	0.487559	0.513782	0.522876	0.535226	0.53082	0.517333	0.50781	0.517108
2.2	0.50457	0.526732	0.541691	0.553159	0.547029	0.534686	0.524231	0.537077
2.3	0.51856	0.542606	0.558092	0.566039	0.567773	0.551409	0.537251	0.554249
2.4	0.533402	0.559473	0.57681	0.581129	0.582943	0.560862	0.557005	0.570596
2.5	0.549849	0.570844	0.586393	0.59764	0.594421	0.582584	0.570512	0.584301
2.6	0.565757	0.592644	0.60046	0.607918	0.608334	0.591172	0.583533	0.598458
2.7	0.580203	0.60263	0.615888	0.616579	0.623336	0.609078	0.596614	0.613783
2.8	0.593375	0.613363	0.623001	0.63474	0.634626	0.621294	0.610973	0.628342
2.9	0.60387	0.627115	0.639539	0.644797	0.648395	0.63239	0.622766	0.644495
3	0.62179	0.637299	0.650987	0.657801	0.659645	0.644314	0.635525	0.655658
3.1	0.623571	0.646587	0.660081	0.66774	0.670204	0.660379	0.650531	0.672817
3.2	0.639448	0.660426	0.674523	0.672786	0.680838	0.664407	0.656345	0.679728
3.3	0.650869	0.669259	0.679748	0.684838	0.688728	0.67503	0.670882	0.691997
3.4	0.659263	0.688124	0.686619	0.695525	0.702432	0.688805	0.680093	0.703653
3.5	0.671412	0.690934	0.70089	0.706872	0.714162	0.69816	0.685217	0.714179
3.6	0.678889	0.703874	0.708623	0.71822	0.719893	0.706715	0.696963	0.722321
3.7	0.686333	0.714994	0.716965	0.719316	0.729165	0.713683	0.703358	0.731941
3.8	0.695884	0.720845	0.720161	0.731358	0.736673	0.721797	0.713565	0.745552
3.9	0.704773	0.727092	0.730311	0.739952	0.74744	0.733752	0.723545	0.751159
4	0.713196	0.738601	0.740103	0.746045	0.751977	0.733745	0.732867	0.76098
4.1	0.725285	0.742339	0.744647	0.754301	0.758117	0.7441	0.740341	0.773619
4.2	0.731019	0.753922	0.754448	0.762094	0.769182	0.750257	0.747732	0.782223
4.3	0.73969	0.756738	0.762469	0.762684	0.777304	0.757577	0.7502	0.784027
4.4	0.740395	0.764793	0.766681	0.770453	0.780493	0.766791	0.760414	0.796501
4.5	0.75527	0.770104	0.769689	0.7773	0.786056	0.777814	0.770436	0.802118
4.6	0.758891	0.777237	0.782092	0.785653	0.792725	0.777351	0.776241	0.810746
4.7	0.762244	0.78401	0.783299	0.79126	0.798563	0.778793	0.779014	0.814512
4.8	0.770356	0.789074	0.790754	0.801944	0.80693	0.795063	0.792534	0.813884
4.9	0.779138	0.797977	0.792095	0.799868	0.807134	0.793413	0.791847	0.831697
5	0.782354	0.800773	0.796602	0.80578	0.814314	0.799522	0.795458	0.837454
5.1	0.787263	0.80414	0.802849	0.811497	0.823354	0.803979	0.805022	0.839668
5.2	0.79512	0.809126	0.808295	0.80971	0.824635	0.8126	0.804133	0.849117
5.3	0.798064	0.818717	0.815699	0.816396	0.829796	0.815551	0.814733	0.853624
5.4	0.802893	0.819344	0.816389	0.82158	0.832555	0.818666	0.817047	0.859462
5.5	0.805723	0.826526	0.825272	0.827083	0.839557	0.826811	0.824769	0.861823
5.6	0.80689	0.827703	0.827133	0.832773	0.839594	0.821141	0.827512	0.869394
5.7	0.820598	0.832827	0.834812	0.836951	0.843259	0.835	0.833581	0.877975
5.8	0.814706	0.841056	0.83834	0.837951	0.849	0.832844	0.843209	0.887294
5.9	0.82156	0.843185	0.836797	0.842199	0.852356	0.842401	0.848389	0.889695
6	0.825017	0.848037	0.845435	0.849446	0.853449	0.846384	0.84687	0.888511
6.1	0.830154	0.842494	0.849063	0.845613	0.857758	0.846874	0.84794	0.900408
6.2	0.832954	0.851327	0.853121	0.853483	0.858446	0.855126	0.85741	0.8979
6.3	0.841374	0.856581	0.85746	0.860005	0.862932	0.854395	0.857842	0.907474
6.4	0.844543	0.860377	0.853493	0.863003	0.873603	0.855773	0.862698	0.904134
6.5	0.847752	0.861635	0.860444	0.860867	0.871145	0.862423	0.865457	0.908708
6.6	0.853533	0.871483	0.860545	0.854623	0.875115	0.860736	0.865179	0.916403
6.7	0.848571	0.867721	0.867537	0.86764	0.874652	0.870417	0.872047	0.91474
6.8	0.857799	0.870119	0.867838	0.869029	0.883981	0.863422	0.868489	0.918177
6.9	0.858171	0.875085	0.869693	0.872486	0.882522	0.867795	0.877841	0.922526
7	0.862544	0.87483	0.870997	0.87152	0.887653	0.870564	0.886774	0.928328
7.1	0.867627	0.877194	0.867201	0.879223	0.895731	0.868955	0.884078	0.933475
7.2	0.867516	0.878944	0.877881	0.877311	0.893152	0.877626	0.891492	0.937445
7.3	0.866447	0.883384	0.875048	0.881909	0.89561	0.882194	0.888119	0.940829
7.4	0.873482	0.884014	0.876647	0.877797	0.890882	0.881345	0.893913	0.940218
7.5	0.874323	0.887512	0.874887	0.883491	0.896861	0.887193	0.895687	0.945262
7.6	0.879568	0.886955	0.882871	0.884494	0.897146	0.888598	0.898182	0.948964
7.7	0.878072	0.885423	0.887448	0.886663	0.902243	0.886445	0.902377	0.950231
7.8	0.882023	0.892186	0.880886	0.885024	0.900204	0.893122	0.905257	0.95338
7.9	0.880001	0.894175	0.884055	0.889091	0.898567	0.891878	0.901307	0.955422
8	0.89	0.894973	0.890567	0.892451	0.904027	0.894959	0.904955	0.960559
8.1	0.879726	0.899537	0.891086	0.889457	0.902216	0.893477	0.908818	0.959077
8.2	0.890754	0.8939	0.894158	0.896368	0.907226	0.898547	0.908369	0.961468
8.3	0.88603	0.90176	0.893618	0.894285	0.912983	0.897699	0.912282	0.970062
8.4	0.886251	0.899681	0.891576	0.899446	0.909834	0.90295	0.911387	0.967587
8.5	0.889799	0.90905	0.893501	0.895533	0.90917	0.903674	0.913241	0.965334
8.6	0.89121	0.909311	0.893122	0.901699	0.909774	0.902266	0.916326	0.971219
8.7	0.891972	0.906746	0.897665	0.902062	0.910317	0.90452	0.919589	0.970864
8.8	0.895231	0.912567	0.894175	0.901119	0.918905	0.910119	0.917765	0.972497
8.9	0.897763	0.909794	0.896525	0.905713	0.917262	0.905633	0.92204	0.970609
9	0.898755	0.90915	0.904241	0.900449	0.913372	0.912832	0.92707	0.975726
9.1	0.901005	0.909093	0.900948	0.904637	0.918804	0.91196	0.924847	0.973727
9.2	0.897582	0.908768	0.903175	0.90636	0.916051	0.914529	0.926792	0.982271
9.3	0.906035	0.911186	0.901837	0.901277	0.916675	0.908014	0.928361	0.979448
9.4	0.900811	0.91422	0.902783	0.906873	0.922449	0.914361	0.924592	0.981547
9.5	0.902829	0.915361	0.904845	0.908839	0.92764	0.918821	0.930678	0.986429
9.6	0.904389	0.908483	0.908953	0.909217	0.929391	0.917121	0.928452	0.982858
9.7	0.901964	0.914167	0.90629	0.910197	0.921624	0.913801	0.932871	0.984109
9.8	0.90185	0.911189	0.906226	0.91127	0.924874	0.914905	0.933629	0.983257
9.9	0.902199	0.918328	0.909596	0.912447	0.925239	0.92428	0.93322	0.97922
10	0.904234	0.914153	0.906256	0.914589	0.923657	0.917859	0.927496	0.984324
10.1	0.908299	0.916128	0.905884	0.909469	0.929313	0.921779	0.932922	0.98828
10.2	0.909073	0.914234	0.904784	0.907903	0.928619	0.917359	0.935661	0.984508
10.3	0.906273	0.92087	0.909308	0.910022	0.929166	0.918171	0.940114	0.987955
10.4	0.909154	0.913922	0.906595	0.909439	0.924542	0.917802	0.939457	0.989726
10.5	0.907021	0.918436	0.907752	0.914398	0.932901	0.920307	0.936298	0.985132
10.6	0.911689	0.913305	0.908493	0.91411	0.927013	0.917476	0.939326	0.990158
10.7	0.902699	0.920977	0.909405	0.916199	0.92881	0.921105	0.937844	0.988133
10.8	0.903896	0.916906	0.908976	0.915317	0.92984	0.924505	0.938662	0.991443
10.9	0.902793	0.91248	0.906937	0.909026	0.925987	0.929743	0.939719	0.991201
11	0.908832	0.920243	0.908748	0.917369	0.928395	0.924753	0.938736	0.990316
11.1	0.905925	0.916018	0.907363	0.913322	0.925692	0.924096	0.943253	0.989474
11.2	0.90799	0.913845	0.909305	0.912105	0.928106	0.921688	0.942669	0.991144
11.3	0.908034	0.916953	0.911236	0.91197	0.927261	0.927114	0.939769	0.998592
11.4	0.907242	0.912279	0.905965	0.912141	0.926695	0.92761	0.937955	0.999165
11.5	0.906374	0.91862	0.906696	0.914499	0.927094	0.920967	0.940433	0.994678
11.6	0.908393	0.919036	0.909761	0.915917	0.931942	0.924934	0.946385	1
11.7	0.902394	0.91307	0.908024	0.916853	0.926906	0.93048	0.94157	0.99501
11.8	0.901435	0.914599	0.912369	0.91532	0.932264	0.925843	0.939977	0.997173
11.9	0.906776	0.911196	0.910458	0.916011	0.928462	0.926114	0.938954	0.997187
12	0.90748	0.921624	0.908372	0.917118	0.929609	0.926235	0.941707	0.996952
12.1	0.911085	0.917959	0.910083	0.915169	0.930611	0.926939	0.940513	0.996345
12.2	0.903809	0.918298	0.9085	0.912296	0.934545	0.92537	0.945882	0.991312
12.3	0.912205	0.91302	0.909523	0.911223	0.926218	0.926986	0.945496	0.987422
12.4	0.907611	0.91644	0.904104	0.906555	0.926111	0.923046	0.946371	0.990658
12.5	0.91027	0.913178	0.903131	0.915743	0.925799	0.921497	0.94442	0.992123
12.6	0.904989	0.914264	0.900214	0.915776	0.930765	0.929196	0.940027	0.995671
12.7	0.906109	0.913899	0.909492	0.916591	0.92921	0.922154	0.94392	0.997847
12.8	0.904154	0.916162	0.908118	0.910019	0.926815	0.924669	0.938012	0.993263
12.9	0.908158	0.913144	0.907001	0.917654	0.928425	0.918218	0.943397	0.996757
13	0.906904	0.911695	0.906146	0.915367	0.927218	0.926416	0.943011	0.994625
13.1	0.900043	0.916102	0.901257	0.913892	0.929649	0.922369	0.942418	0.994279
13.2	0.908906	0.918868	0.902843	0.913523	0.929223	0.923023	0.944041	0.992784
13.3	0.902907	0.913654	0.903577	0.91356	0.92482	0.922704	0.937455	0.987593
13.4	0.897119	0.912732	0.909801	0.912118	0.926239	0.923697	0.941167	0.996409
13.5	0.900754	0.911535	0.900781	0.910602	0.925115	0.925075	0.937234	0.99438
13.6	0.900828	0.912597	0.905931	0.907782	0.924089	0.9226	0.941295	0.995061
13.7	0.901535	0.912735	0.910391	0.911303	0.926041	0.92197	0.934149	0.995413
13.8	0.897357	0.913396	0.902427	0.909372	0.922771	0.917822	0.940872	0.995144
13.9	0.899657	0.91083	0.90185	0.905408	0.928586	0.919177	0.940684	0.994021
14	0.902461	0.910938	0.899252	0.907413	0.923355	0.913691	0.941861	0.99548
14.1	0.896163	0.912024	0.904734	0.903034	0.918043	0.919113	0.941305	0.992405
14.2	0.898051	0.906904	0.90228	0.910032	0.92037	0.916625	0.936902	0.989142
14.3	0.895959	0.910394	0.90014	0.903272	0.924535	0.917795	0.940168	0.996623
14.4	0.901445	0.907333	0.896509	0.905361	0.921705	0.914817	0.943451	0.990926
14.5	0.895865	0.912671	0.899332	0.9068	0.922496	0.920964	0.937405	0.992375
14.6	0.8929	0.907024	0.904315	0.905868	0.919488	0.917017	0.9405	0.987771
14.7	0.895047	0.905616	0.897253	0.904573	0.916551	0.921453	0.940902	0.991563
14.8	0.89342	0.907306	0.897035	0.907487	0.911011	0.914968	0.940393	0.991275
14.9	0.893481	0.902119	0.900281	0.904922	0.916611	0.916953	0.941519	0.991325
15	0.889115	0.907252	0.901374	0.901575	0.917188	0.914827	0.935007	0.991288
15.1	0.889795	0.905525	0.895617	0.903138	0.916957	0.912255	0.932767	0.989736
15.2	0.889095	0.905499	0.899027	0.89896	0.915267	0.912205	0.938461	0.988827
15.3	0.886425	0.90685	0.892656	0.903584	0.915562	0.909945	0.933126	0.987627
15.4	0.889708	0.898578	0.895271	0.901599	0.910639	0.912678	0.933834	0.986882
15.5	0.891552	0.90182	0.892485	0.900804	0.914291	0.911682	0.934008	0.979163
15.6	0.894316	0.902266	0.894497	0.899386	0.907836	0.912128	0.936986	0.981963
15.7	0.887126	0.900187	0.893229	0.903037	0.912913	0.914693	0.934283	0.988421
15.8	0.885634	0.897961	0.896659	0.894741	0.911431	0.914576	0.933964	0.981332
15.9	0.89173	0.899919	0.888585	0.89673	0.908731	0.916316	0.935205	0.982634
16	0.889899	0.900023	0.893521	0.894674	0.905938	0.911615	0.936771	0.987305
16.1	0.888786	0.899288	0.892968	0.89346	0.906384	0.907742	0.927781	0.982379
16.2	0.88443	0.891636	0.892575	0.895023	0.902494	0.909747	0.930631	0.979481
16.3	0.884859	0.889655	0.889886	0.895006	0.905586	0.905428	0.928167	0.981446
16.4	0.881892	0.894906	0.886553	0.893994	0.903128	0.909439	0.929002	0.979968
16.5	0.87879	0.892263	0.883565	0.898091	0.906582	0.909476	0.927432	0.98091
16.6	0.880426	0.89614	0.886439	0.88996	0.901129	0.91136	0.93271	0.977319
16.7	0.877549	0.893102	0.88556	0.891827	0.903587	0.908916	0.928489	0.973781
16.8	0.882046	0.895694	0.881352	0.894259	0.902273	0.908151	0.927094	0.977765
16.9	0.881157	0.892123	0.884363	0.888977	0.904224	0.90075	0.927788	0.979076
17	0.879239	0.891767	0.879766	0.893987	0.899037	0.90397	0.921943	0.972242
17.1	0.879323	0.894171	0.877117	0.892267	0.904379	0.904084	0.922543	0.973177
17.2	0.873649	0.883833	0.880792	0.891566	0.898869	0.906075	0.922583	0.972409
17.3	0.873334	0.88493	0.878307	0.890694	0.899456	0.903047	0.925471	0.973238
17.4	0.876362	0.892015	0.877308	0.886502	0.900978	0.89723	0.924015	0.97024
17.5	0.872965	0.890607	0.878669	0.885419	0.894004	0.896827	0.922309	0.975394
17.6	0.867154	0.885661	0.877331	0.886513	0.89959	0.898326	0.920692	0.971437
17.7	0.872962	0.88726	0.879102	0.887166	0.899228	0.894718	0.92082	0.970465
17.8	0.869418	0.883994	0.873924	0.889437	0.892642	0.897528	0.925085	0.966799
17.9	0.872375	0.886244	0.873546	0.881248	0.896914	0.893836	0.918248	0.966099
18	0.868251	0.879893	0.873881	0.882026	0.894607	0.897474	0.920692	0.967098
18.1	0.869129	0.882874	0.876409	0.882069	0.894929	0.89219	0.917758	0.965971
18.2	0.862188	0.878988	0.875531	0.876875	0.89006	0.898534	0.923703	0.967406
18.3	0.866655	0.880929	0.874344	0.883525	0.889675	0.89675	0.915122	0.960998
18.4	0.868127	0.87942	0.868787	0.882133	0.892927	0.889289	0.915629	0.962081
18.5	0.865836	0.882579	0.868291	0.882126	0.886989	0.890479	0.9147	0.963661
18.6	0.864928	0.877871	0.874974	0.880698	0.889346	0.890899	0.910448	0.956847
18.7	0.859958	0.873945	0.866205	0.872543	0.888706	0.891197	0.912601	0.958614
18.8	0.862725	0.87648	0.871155	0.87436	0.888967	0.887954	0.913734	0.957323
18.9	0.856129	0.874394	0.864669	0.877724	0.89119	0.887599	0.914009	0.960304
19	0.857983	0.870216	0.864428	0.871014	0.883652	0.888753	0.906293	0.962061
19.1	0.858516	0.869401	0.864596	0.869622	0.884876	0.888089	0.910934	0.956723
19.2	0.856343	0.870306	0.863077	0.872754	0.883243	0.881694	0.905821	0.953869
19.3	0.854362	0.87494	0.858818	0.868251	0.883397	0.883119	0.905676	0.955003
19.4	0.855039	0.867131	0.863563	0.87312	0.883454	0.885094	0.90457	0.955579
19.5	0.855673	0.863425	0.855904	0.868207	0.88167	0.881701	0.90461	0.951549
19.6	0.855525	0.866413	0.862882	0.869223	0.882515	0.880973	0.903396	0.953038
19.7	0.855056	0.868345	0.86311	0.86807	0.879783	0.879068	0.908148	0.949866
19.8	0.84674	0.867104	0.855233	0.862946	0.880614	0.875645	0.904255	0.949171
19.9	0.850492	0.865172	0.858288	0.869602	0.879826	0.879052	0.90181	0.947471
20	0.853979	0.864036	0.854278	0.864797	0.877402	0.876359	0.901612	0.947713
20.1	0.853087	0.860092	0.85805	0.861772	0.875551	0.876922	0.901381	0.946945
20.2	0.846136	0.865897	0.854972	0.8614	0.873133	0.87937	0.903493	0.949835
20.3	0.850509	0.85977	0.854415	0.859241	0.876842	0.877861	0.898061	0.947119
20.4	0.843718	0.858902	0.859643	0.8597	0.874666	0.876899	0.897927	0.945818
20.5	0.847511	0.856424	0.851464	0.86028	0.875537	0.873224	0.897246	0.945137
20.6	0.847078	0.854985	0.850462	0.858597	0.870668	0.870189	0.899634	0.941167
20.7	0.840902	0.858064	0.854576	0.858704	0.871285	0.873059	0.894128	0.935933
20.8	0.845603	0.855039	0.846092	0.858339	0.867838	0.870719	0.895094	0.944215
20.9	0.839302	0.855659	0.849902	0.853268	0.873224	0.870739	0.893642	0.938163
21	0.840184	0.852712	0.843792	0.858416	0.867573	0.869096	0.892411	0.936925
21.1	0.839158	0.849493	0.846887	0.853466	0.868204	0.872365	0.893273	0.934343
21.2	0.839185	0.852075	0.846686	0.853372	0.86314	0.867781	0.88668	0.935068
21.3	0.837173	0.850764	0.846076	0.855331	0.866336	0.868254	0.888806	0.936057
21.4	0.83443	0.846485	0.842236	0.852705	0.862403	0.865561	0.889728	0.936617
21.5	0.839691	0.848896	0.843467	0.849419	0.863955	0.869773	0.889551	0.935765
21.6	0.832022	0.850884	0.845465	0.850643	0.863499	0.864384	0.888833	0.929568
21.7	0.833739	0.844325	0.839718	0.847088	0.858811	0.865716	0.885443	0.929347
21.8	0.833364	0.849	0.839708	0.857416	0.860216	0.867164	0.885074	0.931245
21.9	0.830154	0.843635	0.84001	0.850757	0.855629	0.8659	0.883481	0.929756
22	0.829313	0.840684	0.842414	0.850415	0.857795	0.859539	0.881416	0.92927
22.1	0.833551	0.842595	0.833139	0.846062	0.859519	0.863979	0.883062	0.929709
22.2	0.830678	0.841673	0.837438	0.844101	0.856877	0.858181	0.884004	0.929367
22.3	0.832656	0.839181	0.832961	0.842944	0.857678	0.858037	0.88265	0.922459
22.4	0.824511	0.836479	0.839	0.844275	0.857966	0.855917	0.881855	0.923479
22.5	0.827378	0.837562	0.831539	0.839899	0.851907	0.856997	0.880644	0.927318
22.6	0.824954	0.835543	0.832465	0.842847	0.852051	0.850975	0.875185	0.921011
22.7	0.819773	0.838182	0.833011	0.835087	0.851951	0.858157	0.876862	0.919891
22.8	0.819726	0.839332	0.829413	0.838809	0.851414	0.855968	0.876812	0.915766
22.9	0.822154	0.839735	0.829075	0.835761	0.850958	0.855723	0.874042	0.918576
23	0.820225	0.832951	0.832354	0.843366	0.846502	0.852319	0.877771	0.910458
23.1	0.821077	0.832854	0.827868	0.834886	0.84728	0.849633	0.869756	0.920089
23.2	0.814971	0.830191	0.828897	0.838041	0.844449	0.84955	0.870424	0.918707
23.3	0.821091	0.828843	0.822663	0.832934	0.843816	0.847001	0.862929	0.916729
23.4	0.818032	0.829497	0.823002	0.834769	0.841063	0.845204	0.872794	0.913805
23.5	0.818146	0.828106	0.818599	0.832622	0.844537	0.850522	0.869585	0.914837
23.6	0.818619	0.827391	0.826265	0.830366	0.843192	0.8445	0.872509	0.909392
23.7	0.812255	0.831804	0.822154	0.833256	0.840026	0.846854	0.868392	0.903514
23.8	0.81093	0.824498	0.818163	0.830289	0.842233	0.842957	0.868958	0.906464
23.9	0.811155	0.822385	0.817741	0.827505	0.837233	0.842115	0.86471	0.906347
24	0.809787	0.821802	0.818462	0.829712	0.832052	0.839721	0.865142	0.908124
24.1	0.810008	0.822895	0.813194	0.828565	0.833585	0.839399	0.864676	0.905029
24.2	0.810934	0.823465	0.815001	0.825517	0.836398	0.839148	0.862383	0.905754
24.3	0.807758	0.825728	0.819951	0.830017	0.832364	0.838427	0.864049	0.897501
24.4	0.804687	0.816269	0.813237	0.826872	0.836744	0.837636	0.866926	0.898484
24.5	0.806309	0.816306	0.81707	0.822536	0.834437	0.844262	0.863442	0.89891
24.6	0.805713	0.814391	0.813455	0.822559	0.830882	0.833732	0.862728	0.899691
24.7	0.802021	0.817764	0.81376	0.821768	0.835322	0.838125	0.858409	0.898038
24.8	0.802017	0.811953	0.810139	0.816527	0.828136	0.837696	0.85626	0.897927
24.9	0.804281	0.815739	0.804559	0.824585	0.829165	0.832837	0.855126	0.893323
25	0.797688	0.812734	0.805156	0.818666	0.82722	0.829651	0.859797	0.895077
25.1	0.798285	0.815571	0.806105	0.8181	0.830946	0.833095	0.856531	0.893085
25.2	0.795509	0.81374	0.805508	0.815685	0.830607	0.830714	0.851555	0.89004
25.3	0.796458	0.812741	0.80692	0.816329	0.822201	0.831036	0.853952	0.895493
25.4	0.794882	0.810444	0.799167	0.815977	0.826483	0.835412	0.854459	0.894604
25.5	0.793748	0.806353	0.805669	0.813479	0.823528	0.832609	0.852604	0.889504
25.6	0.792736	0.810873	0.7996	0.811259	0.826563	0.830423	0.851471	0.891781
25.7	0.793369	0.811031	0.802772	0.812033	0.818026	0.827452	0.851753	0.888421
25.8	0.791109	0.796337	0.801327	0.812265	0.824249	0.829926	0.848601	0.886023
25.9	0.790083	0.804324	0.800227	0.812037	0.824031	0.825956	0.84799	0.883874
26	0.791988	0.801796	0.796793	0.81265	0.819857	0.826707	0.846736	0.881476
26.1	0.786653	0.800425	0.796122	0.811631	0.814327	0.823351	0.848742	0.88222
26.2	0.783098	0.796719	0.795385	0.80807	0.816238	0.823663	0.845838	0.881724
26.3	0.782159	0.801873	0.797618	0.808456	0.815836	0.821211	0.840285	0.88054
26.4	0.785194	0.799063	0.793128	0.81144	0.814351	0.819572	0.848175	0.877201
26.5	0.788276	0.795136	0.79806	0.801632	0.818076	0.816557	0.839269	0.878894
26.6	0.780681	0.797648	0.789744	0.807788	0.813784	0.814652	0.8407	0.884916
26.7	0.786488	0.800884	0.793943	0.80075	0.811286	0.816678	0.836938	0.879233
26.8	0.77836	0.796759	0.795623	0.807704	0.810706	0.817134	0.838564	0.873032
26.9	0.780721	0.793061	0.786854	0.801028	0.810216	0.822626	0.84127	0.873073
27	0.775232	0.796079	0.791746	0.800807	0.808942	0.814227	0.837022	0.870253
27.1	0.771694	0.790804	0.79122	0.799784	0.807315	0.814599	0.839664	0.877556
27.2	0.77382	0.796458	0.786643	0.801578	0.80416	0.810246	0.837957	0.86756
27.3	0.775406	0.788608	0.787551	0.795928	0.804133	0.810944	0.838769	0.872395
27.4	0.77496	0.788977	0.791307	0.794389	0.811068	0.809317	0.827864	0.870977
27.5	0.772452	0.791263	0.783846	0.796555	0.801595	0.808861	0.835721	0.871272
27.6	0.774584	0.784939	0.785258	0.794462	0.80861	0.809981	0.830899	0.867731
27.7	0.773833	0.786938	0.785154	0.793627	0.801249	0.811494	0.831549	0.869109
27.8	0.770275	0.787457	0.781787	0.790807	0.801397	0.807242	0.833997	0.865732
27.9	0.767573	0.78388	0.775781	0.79524	0.802356	0.803231	0.827948	0.863938
28	0.769263	0.782709	0.771912	0.790656	0.802115	0.803147	0.829574	0.859502
28.1	0.76936	0.777884	0.782159	0.789114	0.797551	0.802654	0.825195	0.861269
28.2	0.770108	0.785529	0.77658	0.787977	0.799979	0.802064	0.827653	0.861829
28.3	0.766942	0.778457	0.774655	0.788269	0.798698	0.802792	0.824115	0.861055
28.4	0.764129	0.781807	0.773887	0.784332	0.797527	0.800435	0.820735	0.857738
28.5	0.762456	0.779842	0.77605	0.785476	0.796991	0.806041	0.825138	0.855995
28.6	0.764706	0.773763	0.773545	0.780553	0.792316	0.797755	0.821973	0.861658
28.7	0.76095	0.773183	0.770426	0.787488	0.793171	0.80423	0.82382	0.857735
28.8	0.758891	0.777522	0.773954	0.784027	0.794379	0.799053	0.819957	0.856182
28.9	0.761356	0.772281	0.768421	0.783283	0.785154	0.796112	0.820004	0.857031
29	0.75928	0.772663	0.768086	0.778431	0.787454	0.797001	0.817348	0.860833
29.1	0.758502	0.775007	0.770859	0.781043	0.791012	0.79296	0.815477	0.853309
29.2	0.756544	0.774658	0.768331	0.779205	0.785875	0.796008	0.816255	0.852507
29.3	0.753234	0.772931	0.766453	0.777193	0.786767	0.792112	0.812801	0.846438
29.4	0.756715	0.773565	0.7632	0.779329	0.788155	0.791401	0.81431	0.847819
29.5	0.752446	0.771288	0.765433	0.772039	0.787333	0.793842	0.819075	0.853114
29.6	0.752289	0.770584	0.764317	0.774457	0.78287	0.791917	0.814522	0.847253
29.7	0.7554	0.768213	0.765447	0.778944	0.783933	0.796085	0.80974	0.84682
29.8	0.748523	0.768988	0.760574	0.7733	0.77938	0.789999	0.811551	0.84562
29.9	0.750964	0.770674	0.762472	0.772103	0.781532	0.79176	0.811095	0.843024

## Sheet: L n=2
x correct	19	17.2667	15.5333	13.8	12.0666	10.3333	8.59996	6.86662
time	100	169.381	286.901	485.956	823.119	1394.21	2361.53	4000
0	0.0275354	0.0323233	0.0319712	0.0281977	0.0226053	0.0244436	0.0180597	0.0183763
0.1	0.046658	0.0516591	0.0537429	0.0478598	0.038116	0.0393598	0.0320196	0.0303913
0.2	0.0678967	0.0774855	0.079747	0.070281	0.0606244	0.0578395	0.0485156	0.04817
0.3	0.0918169	0.104578	0.108972	0.0969215	0.0821119	0.080532	0.0694507	0.0669501
0.4	0.119107	0.131497	0.141108	0.123652	0.108588	0.104055	0.0903534	0.0880919
0.5	0.14439	0.161878	0.17505	0.153746	0.134595	0.12762	0.113036	0.110752
0.6	0.174969	0.19224	0.207176	0.18133	0.163296	0.152328	0.137037	0.134285
0.7	0.202857	0.218868	0.240611	0.209848	0.188347	0.177909	0.16162	0.159248
0.8	0.230127	0.245557	0.272559	0.235988	0.213237	0.203558	0.18576	0.179431
0.9	0.258263	0.273461	0.300734	0.263781	0.240514	0.228657	0.209357	0.204507
1	0.285124	0.29846	0.336201	0.291213	0.2651	0.252597	0.232796	0.226945
1.1	0.31368	0.324021	0.368738	0.313993	0.293006	0.27809	0.255575	0.247986
1.2	0.336069	0.347735	0.394451	0.339797	0.313641	0.298757	0.277192	0.269548
1.3	0.357534	0.373674	0.418187	0.362499	0.338217	0.322193	0.299743	0.29165
1.4	0.378375	0.397329	0.44779	0.386374	0.36037	0.347066	0.319511	0.309593
1.5	0.400421	0.417635	0.470886	0.403061	0.382759	0.364916	0.340236	0.334069
1.6	0.420206	0.436828	0.496344	0.42679	0.400589	0.3865	0.36078	0.353159
1.7	0.442644	0.457233	0.510873	0.442521	0.421234	0.404066	0.381147	0.372799
1.8	0.458035	0.471923	0.535381	0.457576	0.438463	0.419854	0.399391	0.394742
1.9	0.477635	0.493518	0.554384	0.47792	0.457372	0.439193	0.416184	0.409509
2	0.493957	0.505248	0.573045	0.492422	0.474053	0.45777	0.434318	0.427795
2.1	0.508889	0.521234	0.58527	0.505969	0.491676	0.469274	0.451425	0.442857
2.2	0.529359	0.534738	0.601931	0.522956	0.500706	0.488953	0.462044	0.460083
2.3	0.542447	0.551263	0.619535	0.535598	0.514924	0.501927	0.482494	0.474676
2.4	0.551929	0.566079	0.634729	0.548837	0.531695	0.516023	0.493782	0.490755
2.5	0.566086	0.579396	0.650023	0.563417	0.542644	0.533834	0.502942	0.504027
2.6	0.583044	0.590736	0.66176	0.573681	0.555715	0.541074	0.520452	0.521932
2.7	0.594975	0.606945	0.680854	0.588003	0.564865	0.555043	0.53552	0.535
2.8	0.606919	0.613532	0.689848	0.597505	0.575659	0.567242	0.54402	0.545978
2.9	0.621202	0.626003	0.702332	0.610486	0.589295	0.576686	0.552704	0.558713
3	0.630484	0.637268	0.709937	0.620569	0.6009	0.591699	0.569084	0.574651
3.1	0.638774	0.64373	0.715765	0.625573	0.607652	0.598819	0.577684	0.587053
3.2	0.650692	0.656969	0.730436	0.635126	0.618162	0.613597	0.586414	0.595259
3.3	0.660542	0.666451	0.744551	0.643607	0.628132	0.618908	0.598364	0.611368
3.4	0.674053	0.672738	0.748712	0.656039	0.640606	0.629337	0.607229	0.620562
3.5	0.679487	0.683968	0.764206	0.656801	0.650563	0.643429	0.613629	0.632122
3.6	0.69137	0.690901	0.771808	0.668571	0.654536	0.646989	0.619981	0.638677
3.7	0.701802	0.700409	0.780466	0.679788	0.664277	0.658471	0.631673	0.65002
3.8	0.708144	0.709533	0.791076	0.686598	0.671491	0.660946	0.637488	0.659202
3.9	0.716023	0.715303	0.80135	0.694349	0.677436	0.67131	0.648524	0.667356
4	0.726391	0.721832	0.807533	0.696655	0.684162	0.680062	0.652226	0.683022
4.1	0.731683	0.733201	0.814127	0.705207	0.689218	0.688162	0.66229	0.684463
4.2	0.743607	0.737456	0.821361	0.710208	0.697544	0.694452	0.665931	0.694384
4.3	0.746964	0.747281	0.826582	0.716414	0.7029	0.699421	0.681006	0.702073
4.4	0.756921	0.750153	0.828207	0.721073	0.707685	0.707582	0.687005	0.714398
4.5	0.760539	0.756146	0.838341	0.725422	0.716414	0.716269	0.69051	0.719784
4.6	0.769214	0.760087	0.847064	0.731088	0.718304	0.720866	0.698901	0.726226
4.7	0.771265	0.767166	0.857949	0.743203	0.722494	0.724892	0.708199	0.733569
4.8	0.782573	0.771046	0.861031	0.74027	0.730772	0.730827	0.715209	0.740858
4.9	0.790362	0.780347	0.863851	0.747991	0.734283	0.730723	0.71688	0.748227
5	0.790798	0.786537	0.873417	0.756711	0.741426	0.742447	0.725121	0.758242
5.1	0.798985	0.794136	0.882224	0.756003	0.744305	0.740225	0.728807	0.760397
5.2	0.803417	0.792808	0.890576	0.760355	0.753732	0.745281	0.733834	0.772548
5.3	0.814916	0.796675	0.887145	0.766969	0.751345	0.750737	0.740545	0.775924
5.4	0.816421	0.802778	0.892931	0.771534	0.754792	0.760769	0.750023	0.781504
5.5	0.820182	0.806241	0.89675	0.776024	0.762992	0.760972	0.750153	0.782269
5.6	0.821694	0.813265	0.899877	0.777953	0.766962	0.77018	0.757383	0.791257
5.7	0.834597	0.814932	0.912335	0.779239	0.764697	0.768839	0.755541	0.794226
5.8	0.83187	0.821836	0.909611	0.781177	0.772277	0.775507	0.761961	0.797515
5.9	0.839895	0.824104	0.918098	0.787529	0.77353	0.777452	0.76788	0.803162
6	0.842881	0.829635	0.916919	0.792394	0.782143	0.782234	0.771847	0.811636
6.1	0.846722	0.828485	0.92267	0.794178	0.778819	0.785342	0.779575	0.816295
6.2	0.848576	0.832846	0.920896	0.798588	0.787768	0.787826	0.785432	0.816608
6.3	0.850786	0.834545	0.929086	0.80144	0.791105	0.794439	0.784576	0.826223
6.4	0.855035	0.844667	0.927483	0.803033	0.792326	0.79745	0.788863	0.831583
6.5	0.860162	0.845921	0.935321	0.807863	0.789719	0.794966	0.791406	0.834439
6.6	0.863968	0.848027	0.933622	0.805863	0.792695	0.803207	0.790595	0.840341
6.7	0.861496	0.848056	0.931011	0.812932	0.796135	0.807281	0.798303	0.842948
6.8	0.868449	0.851765	0.93724	0.813161	0.801789	0.805246	0.797428	0.846412
6.9	0.872833	0.855623	0.936575	0.823441	0.803947	0.809365	0.804345	0.849013
7	0.875766	0.861215	0.942257	0.817135	0.804726	0.817167	0.803469	0.84941
7.1	0.881103	0.862662	0.948693	0.822763	0.809391	0.812315	0.811077	0.854321
7.2	0.879152	0.862976	0.944781	0.821671	0.807288	0.815064	0.818288	0.859448
7.3	0.881946	0.865806	0.950241	0.824004	0.807637	0.816298	0.813698	0.862052
7.4	0.88539	0.862488	0.950767	0.828678	0.813006	0.819842	0.822747	0.862006
7.5	0.889141	0.86661	0.95214	0.821784	0.814437	0.823829	0.827638	0.86734
7.6	0.891306	0.87146	0.961193	0.826107	0.81614	0.82254	0.825525	0.869944
7.7	0.891635	0.870542	0.953003	0.833786	0.816873	0.828598	0.830019	0.866814
7.8	0.892062	0.878095	0.955652	0.835447	0.817901	0.830546	0.836794	0.877391
7.9	0.893622	0.86987	0.953756	0.840241	0.823464	0.829861	0.834074	0.879168
8	0.89956	0.87649	0.962314	0.833877	0.827548	0.838022	0.835999	0.88069
8.1	0.897402	0.877184	0.958637	0.842176	0.827031	0.83326	0.846163	0.883206
8.2	0.900423	0.87922	0.961054	0.834171	0.823984	0.837188	0.842225	0.89107
8.3	0.900268	0.880108	0.965767	0.83639	0.827034	0.83671	0.843646	0.886382
8.4	0.903011	0.885629	0.964158	0.84227	0.824718	0.839388	0.84268	0.890967
8.5	0.907375	0.885542	0.967683	0.844218	0.829977	0.834116	0.851242	0.895674
8.6	0.908984	0.885743	0.963522	0.841653	0.82843	0.839889	0.852192	0.895709
8.7	0.910677	0.887381	0.969935	0.843207	0.83061	0.84616	0.85245	0.89798
8.8	0.907337	0.891338	0.974293	0.844771	0.834532	0.844131	0.852266	0.901489
8.9	0.911129	0.88929	0.975001	0.844567	0.834284	0.846664	0.851209	0.901279
9	0.913145	0.889564	0.972962	0.849103	0.835928	0.844725	0.854272	0.906371
9.1	0.917975	0.889684	0.978897	0.843288	0.83827	0.845779	0.856673	0.910535
9.2	0.918983	0.890485	0.981553	0.847743	0.835137	0.850495	0.863767	0.904975
9.3	0.921603	0.892039	0.978684	0.853093	0.834339	0.847804	0.863541	0.909194
9.4	0.916803	0.898281	0.982157	0.855277	0.83975	0.84532	0.866529	0.911695
9.5	0.912667	0.890896	0.986605	0.853881	0.842083	0.849869	0.871159	0.910409
9.6	0.918622	0.898155	0.976319	0.848586	0.845178	0.853933	0.867802	0.914309
9.7	0.919862	0.89515	0.985627	0.851746	0.834035	0.849772	0.873114	0.914987
9.8	0.921717	0.898203	0.985859	0.857354	0.8426	0.854143	0.875107	0.920466
9.9	0.925684	0.896058	0.984195	0.852776	0.84491	0.857807	0.876919	0.917103
10	0.921914	0.89978	0.986693	0.854014	0.843175	0.852893	0.87805	0.915161
10.1	0.924243	0.897974	0.988101	0.853458	0.839198	0.857096	0.880173	0.919126
10.2	0.920305	0.900378	0.990379	0.858252	0.843246	0.853578	0.87849	0.924427
10.3	0.922673	0.897677	0.988528	0.857551	0.842997	0.856844	0.880418	0.923907
10.4	0.922986	0.900358	0.992569	0.855716	0.844974	0.858763	0.881022	0.925341
10.5	0.926349	0.900413	0.989988	0.856097	0.846076	0.856973	0.881691	0.922062
10.6	0.927005	0.902377	0.9832	0.857832	0.846115	0.856463	0.881727	0.923742
10.7	0.923481	0.896892	0.992085	0.855564	0.846312	0.858217	0.880263	0.926033
10.8	0.92592	0.90334	0.98973	0.856921	0.849381	0.85529	0.883281	0.924854
10.9	0.929496	0.901118	0.992863	0.862191	0.846706	0.859974	0.882828	0.926534
11	0.928327	0.899476	0.98784	0.861922	0.843911	0.861632	0.880076	0.928149
11.1	0.92842	0.902407	0.984948	0.858698	0.841915	0.858033	0.877627	0.933228
11.2	0.929128	0.904684	0.985452	0.859709	0.851268	0.859635	0.879342	0.931173
11.3	0.928388	0.904222	0.99937	0.863832	0.851904	0.856708	0.876616	0.937056
11.4	0.935059	0.899909	0.989481	0.862704	0.852418	0.864274	0.882224	0.936468
11.5	0.932572	0.902361	0.989665	0.863906	0.850502	0.862617	0.877627	0.931557
11.6	0.926892	0.897192	0.992695	0.859361	0.844948	0.865741	0.877533	0.935709
11.7	0.925962	0.902274	0.992453	0.862494	0.852628	0.86978	0.880292	0.932863
11.8	0.928272	0.900203	0.995681	0.865496	0.850321	0.863286	0.881895	0.93882
11.9	0.933841	0.899186	0.994482	0.860772	0.849927	0.863622	0.882654	0.936953
12	0.927784	0.904006	0.998398	0.863712	0.850512	0.864216	0.876855	0.938041
12.1	0.932766	0.902274	0.997079	0.861409	0.847097	0.863415	0.888023	0.938122
12.2	0.9235	0.900491	0.990734	0.860033	0.852731	0.865521	0.882289	0.939227
12.3	0.92916	0.897706	0.994488	0.855829	0.850027	0.863738	0.887012	0.938755
12.4	0.931431	0.901712	1	0.863948	0.847875	0.865069	0.884298	0.934956
12.5	0.930023	0.899173	0.992537	0.860062	0.851177	0.864232	0.889035	0.939101
12.6	0.930304	0.901118	0.996172	0.861519	0.84879	0.865748	0.890653	0.944083
12.7	0.93117	0.902381	0.998091	0.862132	0.845908	0.864494	0.88991	0.946948
12.8	0.929893	0.898908	0.998617	0.867363	0.848712	0.868219	0.884812	0.941595
12.9	0.926899	0.900549	0.995383	0.861745	0.853445	0.865198	0.888004	0.941847
13	0.930656	0.903192	0.997738	0.863712	0.854731	0.867008	0.886893	0.940639
13.1	0.930058	0.898972	0.995199	0.854372	0.8532	0.862688	0.888799	0.939495
13.2	0.929641	0.897812	0.994769	0.857706	0.852259	0.863296	0.886605	0.937495
13.3	0.929134	0.89904	0.994592	0.861338	0.852654	0.86587	0.893102	0.94112
13.4	0.929095	0.898885	0.994563	0.855461	0.845611	0.867137	0.890372	0.938998
13.5	0.930788	0.904529	0.993962	0.859842	0.848822	0.8683	0.887752	0.940209
13.6	0.926824	0.894243	0.99035	0.860175	0.851122	0.864814	0.893642	0.939728
13.7	0.930078	0.898979	0.992989	0.858543	0.848554	0.867686	0.887555	0.941582
13.8	0.927306	0.896872	0.990334	0.853768	0.847287	0.866319	0.894963	0.940209
13.9	0.927729	0.897396	0.991364	0.856097	0.852366	0.871521	0.888447	0.935825
14	0.931958	0.89621	0.992925	0.852582	0.852043	0.866316	0.88929	0.937024
14.1	0.923681	0.892404	0.994634	0.856479	0.847646	0.865308	0.898258	0.940051
14.2	0.926647	0.896843	0.996359	0.854595	0.853597	0.868591	0.899076	0.938561
14.3	0.923565	0.898746	0.98834	0.856301	0.853371	0.866513	0.89276	0.941007
14.4	0.920331	0.897476	0.985323	0.860682	0.848961	0.86978	0.895218	0.94051
14.5	0.928262	0.894501	0.987649	0.855406	0.848202	0.863247	0.896281	0.943966
14.6	0.92025	0.896585	0.985113	0.852456	0.849597	0.866213	0.895722	0.93933
14.7	0.919869	0.896895	0.988292	0.854062	0.848056	0.860801	0.892327	0.940115
14.8	0.923031	0.893823	0.982247	0.857315	0.844467	0.860811	0.893667	0.942539
14.9	0.92706	0.897312	0.98312	0.853254	0.84741	0.865114	0.889561	0.93547
15	0.91982	0.893225	0.98909	0.856288	0.843381	0.862549	0.893742	0.937466
15.1	0.925332	0.890925	0.982473	0.851943	0.84226	0.868226	0.887219	0.939334
15.2	0.923897	0.895095	0.97921	0.852557	0.849662	0.868167	0.887032	0.935247
15.3	0.921768	0.8938	0.987329	0.857151	0.843536	0.86504	0.888918	0.935166
15.4	0.919378	0.896123	0.983659	0.848796	0.844005	0.864058	0.884673	0.938403
15.5	0.918428	0.891377	0.98078	0.848974	0.848318	0.86314	0.886253	0.941993
15.6	0.916596	0.888392	0.986525	0.846024	0.844112	0.863073	0.886799	0.940073
15.7	0.921371	0.891264	0.982247	0.849203	0.844541	0.862785	0.888298	0.937751
15.8	0.919455	0.891513	0.983061	0.85129	0.846942	0.866187	0.892156	0.939162
15.9	0.918806	0.892575	0.981911	0.847459	0.843869	0.862078	0.890905	0.935211
16	0.918896	0.891487	0.979669	0.847397	0.843675	0.865173	0.889749	0.935751
16.1	0.912696	0.895906	0.981688	0.843113	0.84281	0.862417	0.893567	0.933648
16.2	0.917575	0.892511	0.981966	0.848641	0.843704	0.861196	0.88875	0.937873
16.3	0.916628	0.88665	0.979491	0.846961	0.844254	0.863231	0.891545	0.934927
16.4	0.91899	0.887158	0.980516	0.843866	0.84312	0.858388	0.889552	0.938549
16.5	0.917313	0.883423	0.981184	0.842887	0.839676	0.861677	0.887112	0.930158
16.6	0.917297	0.887087	0.983562	0.845294	0.843265	0.861868	0.888482	0.934562
16.7	0.913252	0.886434	0.97923	0.847452	0.838057	0.856708	0.885801	0.932824
16.8	0.917362	0.880399	0.981488	0.84092	0.837082	0.859328	0.885688	0.936872
16.9	0.914603	0.8835	0.980845	0.840726	0.836662	0.858317	0.887028	0.932594
17	0.913275	0.882877	0.976875	0.842564	0.83943	0.866223	0.887603	0.933383
17.1	0.912218	0.88552	0.977181	0.841776	0.834513	0.858575	0.883	0.932407
17.2	0.911705	0.880515	0.984034	0.840958	0.839201	0.858194	0.886906	0.93168
17.3	0.910855	0.886457	0.973566	0.841614	0.834229	0.855836	0.886728	0.931806
17.4	0.910574	0.882644	0.979782	0.843104	0.830588	0.857319	0.888098	0.927861
17.5	0.9064	0.87954	0.980076	0.842835	0.831302	0.857445	0.884231	0.932455
17.6	0.907068	0.880063	0.976144	0.83617	0.831683	0.855455	0.884011	0.936907
17.7	0.903944	0.879168	0.976626	0.839152	0.835217	0.854143	0.88079	0.927984
17.8	0.908416	0.876919	0.969809	0.838351	0.82884	0.85842	0.879181	0.932223
17.9	0.90963	0.879262	0.975666	0.831861	0.834213	0.853917	0.884421	0.921458
18	0.906952	0.883452	0.970226	0.841178	0.834122	0.852217	0.880331	0.925655
18.1	0.901987	0.874865	0.97534	0.837957	0.832058	0.851077	0.879924	0.928947
18.2	0.903166	0.874202	0.967706	0.838141	0.836177	0.852508	0.880124	0.920967
18.3	0.905049	0.874555	0.968672	0.838467	0.829984	0.856036	0.876748	0.92781
18.4	0.905295	0.8729	0.965331	0.832035	0.831602	0.853781	0.87513	0.924795
18.5	0.905137	0.876477	0.962462	0.833838	0.83137	0.850718	0.880131	0.925571
18.6	0.901544	0.876852	0.959768	0.83168	0.826443	0.84877	0.87679	0.92602
18.7	0.903334	0.874887	0.960592	0.835889	0.826262	0.851009	0.875924	0.927086
18.8	0.905815	0.877036	0.958172	0.829925	0.832077	0.84501	0.876955	0.926382
18.9	0.899289	0.876209	0.95635	0.833431	0.828727	0.846935	0.87794	0.931709
19	0.899631	0.871162	0.954961	0.827561	0.826323	0.844667	0.872568	0.927302
19.1	0.901696	0.872655	0.951927	0.832678	0.824375	0.848783	0.877146	0.925558
19.2	0.89432	0.869634	0.960104	0.831961	0.831179	0.844137	0.87428	0.922211
19.3	0.897005	0.86799	0.958647	0.824672	0.829673	0.845598	0.870158	0.91973
19.4	0.894236	0.873944	0.955129	0.828594	0.825651	0.843078	0.874254	0.925897
19.5	0.895674	0.865712	0.953022	0.827658	0.829761	0.846257	0.875572	0.921322
19.6	0.895199	0.861486	0.95297	0.835117	0.823697	0.844761	0.872122	0.918282
19.7	0.890091	0.867822	0.951775	0.822673	0.825577	0.84122	0.86421	0.920579
19.8	0.890967	0.865735	0.944299	0.823286	0.824382	0.847707	0.876299	0.919626
19.9	0.893516	0.862368	0.948531	0.830148	0.825835	0.840021	0.875446	0.918945
20	0.890191	0.861716	0.94848	0.825457	0.818986	0.839601	0.86873	0.914189
20.1	0.893047	0.861955	0.956269	0.826666	0.826882	0.844648	0.868665	0.921584
20.2	0.890207	0.866681	0.950134	0.82578	0.820401	0.841239	0.868762	0.913911
20.3	0.889235	0.859697	0.946399	0.819106	0.81867	0.840777	0.865941	0.912137
20.4	0.888857	0.862956	0.951165	0.823241	0.818828	0.838341	0.867515	0.912965
20.5	0.885058	0.85885	0.942025	0.823606	0.816431	0.839424	0.86317	0.911404
20.6	0.890311	0.860947	0.9493	0.818243	0.815975	0.837621	0.865315	0.915129
20.7	0.888166	0.854082	0.943979	0.820679	0.816605	0.837921	0.867605	0.914451
20.8	0.885513	0.856534	0.945556	0.822627	0.817665	0.83838	0.870445	0.911188
20.9	0.885917	0.856492	0.947662	0.8155	0.817552	0.837392	0.862646	0.911882
21	0.881556	0.858004	0.945443	0.820127	0.81435	0.833421	0.868804	0.903159
21.1	0.885381	0.856178	0.942332	0.819258	0.814925	0.834348	0.865467	0.909592
21.2	0.88455	0.850541	0.944609	0.815297	0.816214	0.83787	0.86399	0.910193
21.3	0.881824	0.85203	0.940823	0.814948	0.811039	0.832775	0.858388	0.902953
21.4	0.878955	0.849591	0.944341	0.817836	0.811801	0.831202	0.865618	0.909937
21.5	0.879462	0.851222	0.945394	0.819865	0.81047	0.834219	0.859383	0.905712
21.6	0.874005	0.848631	0.943614	0.817768	0.808318	0.833176	0.861528	0.902429
21.7	0.884218	0.849349	0.938035	0.814977	0.812034	0.832219	0.85624	0.9086
21.8	0.874328	0.848838	0.938028	0.81551	0.80944	0.832458	0.856957	0.908862
21.9	0.881291	0.847801	0.940135	0.812179	0.811061	0.828779	0.863725	0.899816
22	0.874648	0.849206	0.937324	0.811908	0.803101	0.83326	0.862349	0.906787
22.1	0.874836	0.84782	0.937773	0.812334	0.806629	0.834268	0.85296	0.904952
22.2	0.879517	0.8473	0.935735	0.810822	0.806254	0.834355	0.858004	0.903376
22.3	0.874845	0.845456	0.932323	0.809653	0.806916	0.828811	0.858071	0.902119
22.4	0.875417	0.844816	0.933602	0.811866	0.805236	0.829577	0.856934	0.898976
22.5	0.870552	0.846661	0.931867	0.809549	0.804148	0.825532	0.850198	0.901612
22.6	0.870109	0.848828	0.928401	0.810257	0.804881	0.825819	0.852088	0.902119
22.7	0.871395	0.845439	0.930346	0.804917	0.802703	0.828446	0.858391	0.899324
22.8	0.87177	0.841143	0.930675	0.807727	0.802487	0.824785	0.848408	0.897738
22.9	0.866203	0.837925	0.930365	0.802325	0.803886	0.826863	0.850638	0.901428
23	0.866969	0.846111	0.929519	0.805834	0.801524	0.821716	0.852088	0.897037
23.1	0.863134	0.836678	0.930947	0.80293	0.795522	0.823063	0.851255	0.895183
23.2	0.858953	0.835747	0.927428	0.808012	0.794863	0.825228	0.857448	0.895063
23.3	0.864804	0.839398	0.92716	0.802881	0.792494	0.826698	0.849675	0.887552
23.4	0.86272	0.835815	0.930142	0.804842	0.794688	0.822349	0.847704	0.89054
23.5	0.86189	0.836351	0.924608	0.802086	0.794042	0.819781	0.849416	0.890107
23.6	0.86462	0.834112	0.923274	0.800313	0.791771	0.81719	0.847103	0.88855
23.7	0.862898	0.835915	0.92255	0.79768	0.796623	0.818098	0.848822	0.890204
23.8	0.864426	0.833893	0.922941	0.798429	0.795089	0.818169	0.844932	0.889403
23.9	0.859163	0.828543	0.920292	0.794963	0.798119	0.816709	0.847051	0.887138
24	0.86201	0.831176	0.921119	0.796542	0.794504	0.816379	0.841311	0.885642
24.1	0.859092	0.831082	0.917798	0.793635	0.792313	0.814205	0.845562	0.881536
24.2	0.857823	0.831896	0.916399	0.793118	0.787526	0.814266	0.843346	0.887684
24.3	0.858504	0.827661	0.914447	0.796791	0.790052	0.810089	0.842997	0.88392
24.4	0.858246	0.830636	0.915048	0.79725	0.787387	0.813604	0.842412	0.886631
24.5	0.854082	0.825264	0.915368	0.791464	0.787022	0.815371	0.839663	0.884515
24.6	0.855228	0.830003	0.91068	0.791884	0.787561	0.812971	0.841718	0.887077
24.7	0.853581	0.826459	0.914254	0.795134	0.786905	0.810554	0.83954	0.88393
24.8	0.855522	0.824424	0.919087	0.792081	0.786366	0.804803	0.841601	0.884063
24.9	0.853645	0.823971	0.912577	0.792523	0.782405	0.810454	0.839702	0.880528
25	0.848108	0.825044	0.908829	0.797806	0.784699	0.806008	0.835605	0.879478
25.1	0.846053	0.824091	0.912625	0.790621	0.784398	0.809488	0.835547	0.880903
25.2	0.847959	0.82432	0.912923	0.791015	0.783432	0.807982	0.836103	0.884289
25.3	0.849274	0.824398	0.909446	0.787603	0.782185	0.805227	0.834145	0.876067
25.4	0.846302	0.819745	0.909543	0.78571	0.787244	0.804904	0.83651	0.875362
25.5	0.845788	0.821619	0.907479	0.787122	0.781972	0.804115	0.831263	0.877152
25.6	0.844412	0.818605	0.906913	0.787571	0.784137	0.803921	0.831473	0.872086
25.7	0.848395	0.81993	0.905172	0.786925	0.777184	0.804009	0.826559	0.871867
25.8	0.844593	0.819019	0.904206	0.783969	0.776719	0.804506	0.827809	0.873886
25.9	0.844687	0.818427	0.899166	0.785703	0.781491	0.803288	0.825735	0.873899
26	0.838031	0.819109	0.905137	0.784224	0.78433	0.803098	0.832733	0.873718
26.1	0.845552	0.815407	0.897774	0.786437	0.778496	0.80356	0.83053	0.870894
26.2	0.844868	0.815562	0.902623	0.778761	0.776131	0.80155	0.829654	0.87408
26.3	0.84509	0.82003	0.900378	0.785943	0.781536	0.800529	0.827813	0.868507
26.4	0.838774	0.811158	0.898736	0.780825	0.777804	0.795082	0.831318	0.864501
26.5	0.837857	0.813856	0.89685	0.777833	0.778354	0.792653	0.829851	0.864975
26.6	0.845394	0.816166	0.891157	0.77321	0.774916	0.8003	0.82422	0.869437
26.7	0.8368	0.812867	0.895005	0.77562	0.773669	0.795599	0.823729	0.867369
26.8	0.839821	0.816518	0.890314	0.77772	0.771782	0.795451	0.828921	0.863464
26.9	0.832998	0.812612	0.893015	0.774144	0.772994	0.79692	0.823054	0.860614
27	0.832248	0.80985	0.895984	0.777743	0.771789	0.79716	0.819235	0.863932
27.1	0.839298	0.810874	0.889516	0.775301	0.771068	0.792653	0.823164	0.86578
27.2	0.83492	0.808348	0.891542	0.779681	0.771408	0.791816	0.819232	0.862504
27.3	0.834426	0.807023	0.890317	0.772968	0.769169	0.788236	0.819949	0.858614
27.4	0.828329	0.804387	0.889361	0.771181	0.769162	0.791021	0.819523	0.86241
27.5	0.827351	0.803104	0.892928	0.773663	0.762387	0.790802	0.815723	0.858485
27.6	0.829547	0.807333	0.888886	0.772687	0.764025	0.787916	0.819946	0.854608
27.7	0.826834	0.802006	0.8855	0.7749	0.765295	0.787652	0.817765	0.855697
27.8	0.830565	0.80355	0.886272	0.769957	0.760591	0.786133	0.818889	0.862032
27.9	0.824853	0.800675	0.884983	0.763379	0.765201	0.787034	0.815723	0.852395
28	0.828307	0.801812	0.883801	0.764953	0.762297	0.787015	0.818676	0.852269
28.1	0.825367	0.804997	0.883206	0.767314	0.762168	0.787955	0.814289	0.853788
28.2	0.82045	0.804564	0.882761	0.764959	0.761541	0.783494	0.815171	0.852285
28.3	0.824653	0.802519	0.883303	0.7623	0.760329	0.782511	0.810573	0.854954
28.4	0.820198	0.803233	0.884667	0.763993	0.759221	0.782563	0.811578	0.851067
28.5	0.819626	0.79495	0.878635	0.762397	0.759654	0.780004	0.808467	0.849862
28.6	0.820014	0.797554	0.871796	0.765864	0.755422	0.782789	0.808606	0.847132
28.7	0.823299	0.796232	0.877611	0.761189	0.754233	0.786052	0.811892	0.846457
28.8	0.818075	0.796255	0.878835	0.759551	0.755319	0.77878	0.809349	0.849975
28.9	0.820249	0.795325	0.87345	0.761402	0.754262	0.783096	0.802316	0.845039
29	0.818285	0.795014	0.870481	0.756236	0.751797	0.778774	0.805905	0.847381
29.1	0.817213	0.796368	0.877323	0.758685	0.756078	0.778767	0.805175	0.843892
29.2	0.817936	0.793321	0.877139	0.75433	0.750379	0.780676	0.808377	0.842887
29.3	0.814308	0.79315	0.87112	0.756482	0.753816	0.778405	0.805517	0.848476
29.4	0.816734	0.792226	0.876202	0.757709	0.748628	0.773091	0.807133	0.840361
29.5	0.813413	0.791958	0.875601	0.757089	0.753383	0.772603	0.803521	0.840819
29.6	0.80985	0.789584	0.871298	0.75253	0.749012	0.773837	0.805663	0.84008
29.7	0.811695	0.789603	0.864895	0.749015	0.750262	0.775549	0.802103	0.838306
29.8	0.804131	0.787509	0.865512	0.754624	0.746211	0.777443	0.803669	0.839627
29.9	0.80923	0.787115	0.86672	0.749306	0.752379	0.771214	0.802057	0.839524

## Sheet: L n=3
x correct	19	18.1333	17.2667	16.4	15.5333	14.6667	13.8	12.9333
time	100	158.382	250.848	397.299	629.249	996.618	1578.46	2500
0	0.0150092	0.0177139	0.0206958	0.0230343	0.0185928	0.0212138	0.022213	0.0251635
0.1	0.0243867	0.0290192	0.0329925	0.0360555	0.0307168	0.0339054	0.0348811	0.0379755
0.2	0.0370469	0.0437746	0.0471516	0.0522471	0.0451427	0.048483	0.0485039	0.0514414
0.3	0.0507665	0.0591108	0.0644626	0.0688493	0.0614885	0.0637014	0.0644888	0.0677899
0.4	0.0666494	0.077769	0.0817188	0.0874473	0.0796235	0.079532	0.0835655	0.0848707
0.5	0.0826003	0.0946798	0.100398	0.108114	0.0978737	0.0993097	0.100754	0.103953
0.6	0.099791	0.114222	0.121384	0.128912	0.120398	0.117994	0.119673	0.122566
0.7	0.118099	0.134947	0.140461	0.149577	0.139587	0.139462	0.139632	0.14209
0.8	0.134635	0.155684	0.161073	0.170144	0.159836	0.160343	0.1597	0.161491
0.9	0.154021	0.177126	0.184651	0.191685	0.181499	0.181575	0.18039	0.182959
1	0.176385	0.19801	0.203338	0.214594	0.202023	0.199736	0.20224	0.203045
1.1	0.19169	0.214296	0.223885	0.235169	0.22478	0.224594	0.223108	0.220097
1.2	0.210759	0.23479	0.245606	0.256569	0.244704	0.243038	0.242151	0.244249
1.3	0.230291	0.255635	0.262321	0.27529	0.264798	0.265468	0.263992	0.261405
1.4	0.248486	0.274767	0.283943	0.293686	0.282726	0.283045	0.282093	0.282313
1.5	0.264445	0.291803	0.302276	0.3132	0.304278	0.303684	0.299483	0.30038
1.6	0.28152	0.312784	0.319234	0.332577	0.323796	0.319444	0.317362	0.320903
1.7	0.299135	0.328175	0.33546	0.350953	0.339527	0.343394	0.335722	0.336951
1.8	0.31214	0.343987	0.354037	0.366535	0.358335	0.355423	0.356007	0.357364
1.9	0.332713	0.357696	0.368696	0.382706	0.37546	0.375251	0.375476	0.375334
2	0.347126	0.377976	0.388683	0.400736	0.389491	0.393195	0.3915	0.39309
2.1	0.364882	0.389635	0.4006	0.417801	0.406776	0.405918	0.409365	0.408018
2.2	0.375442	0.406138	0.417134	0.43025	0.420278	0.424401	0.425701	0.428664
2.3	0.389305	0.4184	0.430038	0.445301	0.43812	0.435552	0.434882	0.439473
2.4	0.403177	0.432379	0.441445	0.459917	0.451537	0.450085	0.454602	0.455947
2.5	0.416784	0.447422	0.457022	0.4711	0.467263	0.464071	0.465936	0.472374
2.6	0.431338	0.458168	0.469394	0.488126	0.479659	0.477236	0.479721	0.486329
2.7	0.442057	0.471461	0.480127	0.495947	0.490318	0.490166	0.496154	0.50002
2.8	0.455248	0.484872	0.494456	0.509899	0.500629	0.504479	0.510067	0.514634
2.9	0.46534	0.49404	0.502651	0.521542	0.51472	0.515408	0.519946	0.527155
3	0.475929	0.507161	0.512029	0.532068	0.526065	0.531383	0.536368	0.542316
3.1	0.487799	0.517485	0.527067	0.542769	0.535309	0.540559	0.549075	0.554882
3.2	0.498272	0.525876	0.531762	0.5515	0.544582	0.551233	0.55697	0.568163
3.3	0.509792	0.537493	0.544728	0.567783	0.557663	0.563093	0.569593	0.578492
3.4	0.519185	0.547485	0.555309	0.573907	0.567671	0.574161	0.57601	0.587964
3.5	0.529162	0.558686	0.565411	0.583541	0.579711	0.584338	0.590506	0.603156
3.6	0.537239	0.570177	0.57201	0.589928	0.583057	0.593326	0.597864	0.611252
3.7	0.546614	0.576583	0.577885	0.598071	0.593692	0.603216	0.615047	0.622377
3.8	0.556732	0.582023	0.593185	0.608762	0.603242	0.613041	0.62184	0.634864
3.9	0.562395	0.590972	0.599384	0.615929	0.609298	0.621302	0.631511	0.644247
4	0.575955	0.602026	0.608924	0.626156	0.624014	0.627794	0.638851	0.651467
4.1	0.584692	0.609918	0.615212	0.632842	0.629191	0.640739	0.648529	0.661297
4.2	0.591765	0.617109	0.624888	0.638992	0.634184	0.646062	0.654414	0.671741
4.3	0.598401	0.623274	0.631294	0.647208	0.644969	0.652139	0.666633	0.681953
4.4	0.607025	0.635445	0.63646	0.65403	0.647653	0.664681	0.676873	0.686251
4.5	0.617702	0.643761	0.647064	0.663884	0.656646	0.674208	0.683324	0.6969
4.6	0.622403	0.649795	0.652712	0.667791	0.666698	0.677752	0.693486	0.704258
4.7	0.627647	0.650925	0.659217	0.675322	0.674791	0.685019	0.697684	0.712251
4.8	0.639099	0.660067	0.66313	0.683952	0.679942	0.691344	0.703954	0.724255
4.9	0.645898	0.667653	0.67019	0.691801	0.687797	0.698158	0.709853	0.730392
5	0.651569	0.677009	0.680567	0.697632	0.692032	0.70465	0.7207	0.741375
5.1	0.65595	0.682612	0.685032	0.705458	0.697993	0.712301	0.726656	0.746892
5.2	0.663839	0.686107	0.692364	0.709194	0.702398	0.716123	0.735335	0.755267
5.3	0.671425	0.692971	0.695469	0.712406	0.708916	0.722204	0.737535	0.761469
5.4	0.674365	0.699813	0.704496	0.720713	0.718566	0.731564	0.746894	0.768176
5.5	0.685785	0.703222	0.711116	0.727854	0.718139	0.73346	0.754276	0.771632
5.6	0.690305	0.70996	0.711514	0.734715	0.726306	0.741979	0.758273	0.778757
5.7	0.69228	0.71561	0.721414	0.737742	0.729311	0.747012	0.764438	0.78831
5.8	0.697365	0.720185	0.726649	0.740849	0.736709	0.755011	0.769345	0.792639
5.9	0.69905	0.729029	0.729133	0.746345	0.742597	0.761799	0.772681	0.794177
6	0.713852	0.735806	0.733395	0.755506	0.746549	0.761715	0.783847	0.804025
6.1	0.71769	0.739981	0.74199	0.756866	0.754682	0.770151	0.788624	0.807195
6.2	0.72121	0.743141	0.743117	0.759521	0.757847	0.769971	0.790491	0.813745
6.3	0.723232	0.75098	0.747831	0.761286	0.760664	0.779293	0.799722	0.826403
6.4	0.72826	0.752105	0.751247	0.770489	0.765997	0.782974	0.805631	0.82437
6.5	0.739356	0.756356	0.760679	0.775532	0.770052	0.788681	0.804274	0.829482
6.6	0.734281	0.760666	0.759479	0.780483	0.775202	0.790353	0.8121	0.830774
6.7	0.741093	0.766968	0.759842	0.780462	0.777889	0.79324	0.817193	0.838841
6.8	0.745097	0.76911	0.769403	0.786146	0.784789	0.802921	0.823267	0.844046
6.9	0.74645	0.77515	0.770481	0.788883	0.786416	0.806395	0.826152	0.849581
7	0.751872	0.777925	0.779411	0.797666	0.789903	0.808074	0.830685	0.854588
7.1	0.759858	0.782453	0.77849	0.79955	0.790486	0.817101	0.834598	0.858647
7.2	0.765181	0.787917	0.789126	0.801088	0.800334	0.818441	0.836777	0.859108
7.3	0.76668	0.79087	0.785908	0.80714	0.804441	0.819918	0.842997	0.86893
7.4	0.766356	0.796795	0.794778	0.810185	0.806139	0.820562	0.846066	0.875412
7.5	0.773991	0.802176	0.797206	0.809691	0.809751	0.831634	0.847295	0.880698
7.6	0.779259	0.803902	0.800083	0.816777	0.812273	0.829746	0.855673	0.879673
7.7	0.78329	0.809165	0.80137	0.821763	0.816272	0.83679	0.856811	0.88317
7.8	0.790434	0.807907	0.803839	0.825783	0.818367	0.838367	0.861305	0.89057
7.9	0.787936	0.809646	0.809748	0.827182	0.824151	0.841723	0.868367	0.891454
8	0.792521	0.814962	0.815071	0.830444	0.823803	0.844922	0.86673	0.891109
8.1	0.795785	0.816895	0.812197	0.832309	0.830013	0.846963	0.868302	0.895794
8.2	0.7977	0.821844	0.819924	0.836651	0.834051	0.848509	0.875778	0.897007
8.3	0.801313	0.824467	0.820342	0.839926	0.832534	0.855752	0.876013	0.90514
8.4	0.802858	0.826413	0.822942	0.840588	0.83606	0.859937	0.883874	0.907047
8.5	0.806604	0.828611	0.825249	0.842534	0.836419	0.86192	0.881376	0.913018
8.6	0.810031	0.831995	0.829767	0.843724	0.842793	0.869299	0.888417	0.912466
8.7	0.812571	0.83526	0.832435	0.848919	0.844614	0.867745	0.890413	0.919223
8.8	0.816662	0.841789	0.832657	0.850055	0.847057	0.866568	0.894998	0.915069
8.9	0.813549	0.838548	0.839081	0.850206	0.847065	0.865796	0.895046	0.924928
9	0.8203	0.839615	0.844619	0.856398	0.851561	0.872281	0.891326	0.924627
9.1	0.824423	0.842278	0.845176	0.857512	0.854705	0.871187	0.905153	0.927792
9.2	0.825882	0.849571	0.845422	0.859662	0.848608	0.879351	0.904036	0.931648
9.3	0.821885	0.848632	0.846259	0.860416	0.85736	0.878313	0.909814	0.934664
9.4	0.83068	0.849322	0.850701	0.865558	0.857904	0.883327	0.909207	0.937776
9.5	0.831744	0.85278	0.847277	0.870253	0.861062	0.881922	0.908532	0.936335
9.6	0.831862	0.854303	0.851726	0.866992	0.862822	0.882032	0.917447	0.944345
9.7	0.835009	0.857112	0.851347	0.873395	0.865487	0.888504	0.919249	0.94351
9.8	0.838862	0.85696	0.853128	0.870656	0.868498	0.893892	0.91706	0.941342
9.9	0.83962	0.865474	0.856944	0.876016	0.86787	0.891064	0.924044	0.946759
10	0.842124	0.857847	0.861067	0.873322	0.873845	0.897591	0.921418	0.946822
10.1	0.847541	0.864153	0.862749	0.87786	0.873528	0.900416	0.923555	0.949197
10.2	0.844454	0.8634	0.861995	0.880886	0.873615	0.899754	0.930677	0.950625
10.3	0.849688	0.872338	0.86706	0.883298	0.877329	0.900536	0.928381	0.952548
10.4	0.84695	0.870214	0.86781	0.880515	0.877818	0.904949	0.929063	0.956942
10.5	0.849204	0.867891	0.869759	0.88345	0.880183	0.901687	0.936304	0.953604
10.6	0.847164	0.866364	0.873071	0.883936	0.877693	0.90735	0.938608	0.954486
10.7	0.856842	0.875796	0.875582	0.887078	0.879129	0.906445	0.93272	0.960599
10.8	0.853295	0.874734	0.870465	0.890986	0.884779	0.907329	0.930698	0.958425
10.9	0.859223	0.874316	0.876408	0.891465	0.882521	0.9095	0.939262	0.964162
11	0.853944	0.881538	0.875608	0.889317	0.884679	0.913455	0.939275	0.96192
11.1	0.859246	0.881211	0.879783	0.891245	0.888728	0.916979	0.940235	0.971177
11.2	0.857248	0.887125	0.87746	0.896029	0.888854	0.914685	0.941755	0.966356
11.3	0.86125	0.883921	0.879484	0.896296	0.892312	0.920968	0.945357	0.963921
11.4	0.856827	0.882547	0.883915	0.893065	0.888524	0.922066	0.943913	0.970918
11.5	0.859738	0.887224	0.877669	0.893837	0.891376	0.923649	0.94876	0.969466
11.6	0.862963	0.886429	0.880507	0.897993	0.889586	0.923249	0.948648	0.97333
11.7	0.86595	0.88334	0.882717	0.897243	0.893405	0.918234	0.94978	0.974737
11.8	0.864637	0.886654	0.887541	0.90193	0.895056	0.920583	0.948786	0.978315
11.9	0.870633	0.885027	0.886042	0.898454	0.894909	0.918825	0.952754	0.973547
12	0.866665	0.889163	0.885854	0.900246	0.899552	0.923406	0.951564	0.982176
12.1	0.869482	0.893162	0.881828	0.903167	0.897656	0.929542	0.954713	0.975773
12.2	0.868537	0.885443	0.89329	0.902147	0.894088	0.923298	0.955179	0.978828
12.3	0.873573	0.893241	0.884695	0.902901	0.900005	0.930324	0.960772	0.979757
12.4	0.870701	0.890478	0.892354	0.904198	0.901156	0.932024	0.960125	0.979626
12.5	0.872775	0.895998	0.893544	0.909199	0.90543	0.929202	0.964494	0.986976
12.6	0.871841	0.894692	0.888354	0.907049	0.89973	0.930047	0.961169	0.980968
12.7	0.873217	0.891334	0.892822	0.905511	0.901198	0.930008	0.956594	0.986157
12.8	0.875255	0.896016	0.893199	0.908857	0.904125	0.932333	0.955192	0.985237
12.9	0.876191	0.894606	0.893573	0.90774	0.90667	0.935184	0.964026	0.98621
13	0.870285	0.891145	0.893926	0.911391	0.902712	0.936453	0.959665	0.984899
13.1	0.873196	0.896393	0.895885	0.910301	0.905464	0.930975	0.961407	0.989343
13.2	0.875103	0.892404	0.888268	0.912796	0.913515	0.928545	0.965072	0.984274
13.3	0.880716	0.89684	0.899526	0.908459	0.905846	0.933738	0.958553	0.988033
13.4	0.878195	0.896788	0.900578	0.911467	0.908373	0.934808	0.96554	0.98655
13.5	0.877376	0.897193	0.895472	0.914036	0.902663	0.935788	0.968739	0.989563
13.6	0.875838	0.89662	0.89888	0.914363	0.912786	0.937018	0.967015	0.98989
13.7	0.88085	0.902874	0.899406	0.910471	0.907907	0.936534	0.967476	0.99073
13.8	0.881682	0.898001	0.898252	0.91255	0.908362	0.939623	0.964954	0.992459
13.9	0.882173	0.898904	0.897878	0.916089	0.907687	0.941666	0.968046	0.994444
14	0.878061	0.897651	0.899738	0.916929	0.908783	0.941514	0.969971	0.993089
14.1	0.880536	0.902111	0.902377	0.916322	0.904705	0.942765	0.964324	0.993194
14.2	0.884836	0.904002	0.898218	0.91702	0.908713	0.944588	0.964884	0.990199
14.3	0.877839	0.898658	0.901093	0.915689	0.914868	0.943186	0.967481	0.99186
14.4	0.879076	0.902296	0.899029	0.913808	0.911768	0.940426	0.964638	0.994687
14.5	0.882796	0.900073	0.904878	0.920717	0.907185	0.9391	0.970756	0.997601
14.6	0.882451	0.901496	0.901125	0.919419	0.91333	0.942948	0.968344	0.995854
14.7	0.883735	0.898336	0.901143	0.917999	0.912626	0.944033	0.967201	0.992896
14.8	0.884059	0.899265	0.897316	0.920494	0.915289	0.94463	0.97152	0.993939
14.9	0.885639	0.89864	0.9009	0.915846	0.914991	0.942885	0.972229	0.993521
15	0.884282	0.901619	0.903649	0.91707	0.910714	0.94395	0.974672	0.99434
15.1	0.880818	0.8969	0.901928	0.91842	0.914018	0.948017	0.970309	0.989848
15.2	0.884237	0.900319	0.90747	0.918051	0.913834	0.944959	0.969312	0.996903
15.3	0.879283	0.901776	0.900944	0.923065	0.916304	0.947185	0.969241	0.994394
15.4	0.882673	0.900858	0.901431	0.916693	0.914978	0.94498	0.973008	0.993264
15.5	0.882532	0.89905	0.903107	0.916367	0.913793	0.945995	0.97372	0.993034
15.6	0.883565	0.900842	0.900999	0.920468	0.919192	0.945428	0.966937	1
15.7	0.88215	0.902281	0.904546	0.919291	0.915723	0.943981	0.971041	0.99232
15.8	0.881407	0.899631	0.904099	0.919678	0.919699	0.947494	0.972192	0.993965
15.9	0.884028	0.898972	0.899877	0.916918	0.915553	0.94678	0.976212	0.993756
16	0.883272	0.901028	0.898705	0.918909	0.91464	0.945169	0.975349	0.995786
16.1	0.883594	0.901614	0.904928	0.919252	0.912746	0.943555	0.967641	0.997133
16.2	0.881504	0.898341	0.901564	0.916973	0.913874	0.945624	0.970133	0.992951
16.3	0.882461	0.901449	0.900403	0.919317	0.914112	0.945843	0.970241	0.996137
16.4	0.882767	0.896005	0.896937	0.917823	0.911274	0.945124	0.969372	0.994923
16.5	0.881687	0.897706	0.902869	0.91713	0.915634	0.948313	0.967635	0.994151
16.6	0.877957	0.900696	0.90192	0.914941	0.914392	0.949809	0.968043	0.992179
16.7	0.885239	0.899581	0.906565	0.919474	0.916225	0.94328	0.970016	0.99283
16.8	0.87962	0.900722	0.900638	0.920099	0.913348	0.945019	0.96882	0.993722
16.9	0.88311	0.901676	0.903188	0.916479	0.916411	0.949432	0.973683	0.992987
17	0.882168	0.90159	0.898033	0.912108	0.911784	0.945354	0.972637	0.992626
17.1	0.879129	0.895951	0.900439	0.915302	0.91796	0.946769	0.973461	0.993905
17.2	0.881553	0.898289	0.899691	0.922061	0.912927	0.949027	0.971915	0.995239
17.3	0.883144	0.898354	0.895631	0.918022	0.916202	0.944653	0.971049	0.989425
17.4	0.881616	0.900086	0.899715	0.918158	0.913916	0.941752	0.967332	0.992427
17.5	0.880353	0.894381	0.900055	0.916463	0.91001	0.949108	0.972506	0.993066
17.6	0.878273	0.891546	0.900494	0.922681	0.915454	0.948022	0.969613	0.996165
17.7	0.878752	0.895393	0.900455	0.915752	0.909244	0.942032	0.968815	0.991899
17.8	0.88175	0.895731	0.901551	0.915854	0.913419	0.945318	0.969511	0.9904
17.9	0.881776	0.895982	0.905276	0.916869	0.910408	0.948676	0.972642	0.99176
18	0.875809	0.897018	0.897282	0.916829	0.912024	0.945302	0.966851	0.989207
18.1	0.878407	0.896691	0.901656	0.911386	0.911258	0.946147	0.969867	0.991601
18.2	0.877847	0.895265	0.897138	0.917698	0.914724	0.94583	0.967308	0.990853
18.3	0.877541	0.893732	0.899236	0.91232	0.917735	0.944423	0.967994	0.994899
18.4	0.879223	0.89299	0.895652	0.911928	0.912312	0.946772	0.967774	0.988689
18.5	0.872409	0.893819	0.895265	0.915987	0.914865	0.94051	0.969056	0.990123
18.6	0.878169	0.893863	0.895184	0.912568	0.913497	0.945373	0.969626	0.991622
18.7	0.875898	0.889189	0.893915	0.912508	0.911648	0.943981	0.964133	0.993183
18.8	0.874834	0.89097	0.893439	0.913115	0.912328	0.942503	0.96978	0.990507
18.9	0.871347	0.893837	0.894031	0.9134	0.913547	0.939877	0.970364	0.988436
19	0.875749	0.894857	0.888862	0.913079	0.912226	0.940887	0.966942	0.987319
19.1	0.870107	0.890724	0.889082	0.909016	0.910159	0.943293	0.967355	0.985569
19.2	0.874862	0.891198	0.89351	0.909432	0.908747	0.940246	0.969887	0.989103
19.3	0.870497	0.89	0.895286	0.913578	0.911768	0.940962	0.965025	0.982964
19.4	0.871446	0.886879	0.892953	0.906233	0.908538	0.94137	0.965273	0.984724
19.5	0.872427	0.889984	0.896618	0.90679	0.909398	0.943165	0.969587	0.989806
19.6	0.874985	0.887081	0.889518	0.906411	0.909733	0.941941	0.965817	0.990651
19.7	0.868472	0.889775	0.893445	0.907146	0.908132	0.941896	0.964099	0.982087
19.8	0.875239	0.891485	0.893942	0.908001	0.911261	0.938323	0.962979	0.989058
19.9	0.870502	0.883479	0.888043	0.906999	0.905038	0.939516	0.963992	0.984431
20	0.870005	0.888985	0.892765	0.902809	0.910065	0.935433	0.961698	0.985051
20.1	0.866343	0.88413	0.888927	0.898436	0.901342	0.94006	0.964214	0.98148
20.2	0.87097	0.886024	0.885966	0.90408	0.909215	0.940845	0.964766	0.978002
20.3	0.869286	0.888624	0.887672	0.905121	0.905435	0.935137	0.961174	0.986343
20.4	0.862084	0.885851	0.886291	0.904528	0.909362	0.940581	0.965067	0.979058
20.5	0.870829	0.883732	0.887073	0.900782	0.904282	0.934031	0.964831	0.982019
20.6	0.86301	0.884167	0.887609	0.902712	0.903356	0.932448	0.961211	0.979639
20.7	0.869647	0.887575	0.884261	0.902843	0.902733	0.938111	0.963262	0.9778
20.8	0.863719	0.880677	0.883633	0.907408	0.903039	0.939605	0.960526	0.975744
20.9	0.868373	0.881263	0.884946	0.898951	0.90204	0.935964	0.961054	0.977724
21	0.863484	0.880941	0.884245	0.898022	0.896489	0.931493	0.95826	0.978441
21.1	0.860246	0.881878	0.882145	0.899014	0.903005	0.933861	0.958666	0.975744
21.2	0.862432	0.877962	0.878224	0.898517	0.899351	0.933298	0.960345	0.97638
21.3	0.860847	0.877347	0.885098	0.902113	0.901977	0.930076	0.960526	0.978533
21.4	0.863455	0.876701	0.877546	0.898985	0.896257	0.935433	0.953267	0.973866
21.5	0.861255	0.875056	0.882322	0.899764	0.896238	0.929022	0.954988	0.974465
21.6	0.860235	0.877541	0.876168	0.895718	0.899097	0.927803	0.953952	0.976555
21.7	0.860201	0.876359	0.879531	0.898611	0.896589	0.926503	0.953076	0.972631
21.8	0.858977	0.873965	0.87939	0.893583	0.892812	0.93521	0.953254	0.974983
21.9	0.86013	0.873918	0.878401	0.898294	0.896984	0.930031	0.952417	0.970366
22	0.856733	0.878347	0.875885	0.893348	0.895456	0.929872	0.951656	0.972467
22.1	0.858765	0.871661	0.876432	0.891574	0.892621	0.922778	0.948849	0.966898
22.2	0.859615	0.870748	0.879678	0.891637	0.891763	0.928179	0.952537	0.97265
22.3	0.853842	0.870559	0.874656	0.893821	0.895757	0.927185	0.94774	0.967638
22.4	0.854569	0.871998	0.872445	0.89542	0.893604	0.924287	0.95384	0.966955
22.5	0.851878	0.865788	0.872558	0.891645	0.895221	0.924243	0.94706	0.970622
22.6	0.853748	0.869916	0.871399	0.88764	0.890614	0.926586	0.950505	0.965755
22.7	0.856162	0.869926	0.871666	0.893029	0.895093	0.926602	0.949275	0.96729
22.8	0.852817	0.867062	0.874949	0.893133	0.890716	0.922275	0.947421	0.963662
22.9	0.852139	0.868553	0.871577	0.889249	0.890939	0.921629	0.948645	0.964392
23	0.853528	0.864119	0.872628	0.889979	0.887298	0.9225	0.947243	0.963589
23.1	0.845294	0.866249	0.868553	0.888812	0.890002	0.920981	0.94446	0.963594
23.2	0.849623	0.862249	0.867933	0.888799	0.890206	0.91994	0.945195	0.964517
23.3	0.85018	0.861242	0.867538	0.884133	0.888608	0.920907	0.944096	0.961415
23.4	0.84866	0.86656	0.864572	0.885676	0.889134	0.919239	0.941734	0.958462
23.5	0.846272	0.861208	0.863269	0.884671	0.8812	0.915509	0.941172	0.963076
23.6	0.848195	0.86147	0.864826	0.886118	0.883957	0.921229	0.941431	0.960337
23.7	0.846076	0.858789	0.862806	0.885231	0.884214	0.918279	0.941653	0.960479
23.8	0.841954	0.857182	0.864159	0.882529	0.882757	0.914664	0.94255	0.957808
23.9	0.842945	0.858689	0.868226	0.883293	0.880178	0.915038	0.940212	0.959532
24	0.842644	0.857465	0.857431	0.878972	0.886427	0.913719	0.935598	0.95871
24.1	0.841454	0.856097	0.859788	0.88334	0.882969	0.920633	0.93712	0.955349
24.2	0.84266	0.855697	0.860081	0.881012	0.884216	0.917648	0.937656	0.956079
24.3	0.842393	0.858187	0.860047	0.879581	0.881844	0.914161	0.940471	0.953803
24.4	0.83934	0.855297	0.857653	0.879252	0.880219	0.912516	0.942589	0.953824
24.5	0.83565	0.854632	0.859427	0.882778	0.878252	0.910698	0.935752	0.955315
24.6	0.836039	0.853887	0.858082	0.879858	0.879673	0.910638	0.938041	0.955127
24.7	0.840541	0.852508	0.860285	0.874912	0.875315	0.914188	0.933293	0.951928
24.8	0.837015	0.852513	0.855634	0.875477	0.875106	0.913324	0.930303	0.947852
24.9	0.832152	0.85351	0.855315	0.876408	0.875501	0.90984	0.932728	0.951148
25	0.839636	0.844376	0.852249	0.8712	0.882516	0.907277	0.926531	0.945367
25.1	0.835997	0.849129	0.85352	0.870986	0.874679	0.906518	0.933722	0.947256
25.2	0.831491	0.845208	0.851674	0.869984	0.877737	0.902521	0.92667	0.945435
25.3	0.83193	0.847271	0.855875	0.86966	0.876191	0.903617	0.928472	0.94616
25.4	0.830677	0.845422	0.851546	0.867967	0.871402	0.902071	0.923672	0.943466
25.5	0.827444	0.846829	0.851679	0.867319	0.87408	0.901504	0.920696	0.943066
25.6	0.830122	0.84431	0.843965	0.86888	0.871561	0.906877	0.927724	0.940926
25.7	0.828148	0.843384	0.850149	0.864776	0.871331	0.9082	0.924593	0.945417
25.8	0.828145	0.841682	0.85051	0.868778	0.867049	0.896649	0.928789	0.938998
25.9	0.828367	0.845414	0.846413	0.867182	0.86865	0.900371	0.922602	0.93927
26	0.828616	0.84312	0.845171	0.866887	0.865932	0.894849	0.921554	0.940656
26.1	0.827643	0.842649	0.851368	0.862851	0.866832	0.897962	0.925469	0.938852
26.2	0.821237	0.837235	0.846249	0.861791	0.869126	0.897844	0.922469	0.935783
26.3	0.825014	0.841433	0.845767	0.864282	0.862254	0.899804	0.920369	0.936353
26.4	0.823008	0.839178	0.843651	0.859733	0.863411	0.894575	0.922647	0.935911
26.5	0.818726	0.839335	0.843628	0.861812	0.866427	0.896492	0.921488	0.93712
26.6	0.826413	0.836644	0.841893	0.860332	0.863212	0.9008	0.918985	0.937211
26.7	0.822178	0.831681	0.839142	0.86047	0.863792	0.894339	0.916463	0.931841
26.8	0.821582	0.832822	0.843599	0.861687	0.859597	0.893693	0.915556	0.936458
26.9	0.818475	0.834023	0.840975	0.860643	0.859524	0.890918	0.913277	0.928783
27	0.820664	0.833382	0.841103	0.861878	0.857763	0.897047	0.911807	0.935428
27.1	0.818718	0.833251	0.834402	0.856296	0.857279	0.89278	0.917141	0.931653
27.2	0.81623	0.831815	0.838244	0.858639	0.862199	0.88751	0.914784	0.930076
27.3	0.820653	0.826764	0.833549	0.856821	0.854936	0.887201	0.91623	0.928164
27.4	0.81442	0.83142	0.837883	0.854862	0.857897	0.888645	0.909696	0.923999
27.5	0.815942	0.829772	0.837494	0.853405	0.856345	0.890502	0.917368	0.929443
27.6	0.810763	0.827039	0.833094	0.855414	0.856761	0.889864	0.907478	0.926207
27.7	0.814255	0.831007	0.830287	0.853186	0.850928	0.887319	0.912192	0.927345
27.8	0.812223	0.825273	0.834559	0.851765	0.852006	0.886764	0.911156	0.922843
27.9	0.812586	0.824263	0.833463	0.849665	0.854967	0.88486	0.908164	0.926079
28	0.812157	0.820941	0.831161	0.849895	0.855158	0.885333	0.910319	0.922524
28.1	0.806999	0.825571	0.829767	0.850426	0.846479	0.886461	0.908857	0.922341
28.2	0.809233	0.821234	0.827567	0.851582	0.851789	0.883947	0.905372	0.923209
28.3	0.809544	0.823031	0.829905	0.845249	0.851062	0.885074	0.908697	0.917973
28.4	0.80791	0.824465	0.82646	0.847206	0.848781	0.886398	0.906291	0.921216
28.5	0.806876	0.819123	0.827653	0.844671	0.848053	0.882921	0.90497	0.919024
28.6	0.806633	0.818736	0.823029	0.84255	0.846602	0.877219	0.905284	0.918802
28.7	0.801449	0.81758	0.823871	0.839283	0.843651	0.876929	0.904203	0.913204
28.8	0.805888	0.825401	0.826225	0.844585	0.847488	0.876756	0.9038	0.909937
28.9	0.804946	0.815323	0.822369	0.842992	0.848265	0.877376	0.898762	0.914881
29	0.804988	0.817528	0.822916	0.84017	0.845265	0.87836	0.898477	0.914828
29.1	0.803633	0.816343	0.819641	0.841056	0.845202	0.871559	0.899317	0.910934
29.2	0.800091	0.818213	0.823086	0.841755	0.841896	0.874085	0.902336	0.912459
29.3	0.797373	0.812364	0.818922	0.839299	0.841875	0.874562	0.897596	0.911355
29.4	0.796513	0.810423	0.822142	0.839503	0.844682	0.877298	0.895532	0.910549
29.5	0.796078	0.814166	0.826162	0.840185	0.841514	0.872887	0.896858	0.90798
29.6	0.794938	0.81205	0.815597	0.840146	0.837784	0.874441	0.895244	0.907708
29.7	0.797951	0.811174	0.818796	0.835542	0.836492	0.869984	0.892116	0.903364
29.8	0.797682	0.812712	0.816649	0.840748	0.837611	0.867277	0.890083	0.908386
29.9	0.793476	0.804357	0.811449	0.833858	0.83442	0.867873	0.892864	0.904517

## Sheet: L n=4
x correct	19	18.1333	17.2667	16.4	15.5333	14.6667	13.8	12.9333
time	100	158.382	250.848	397.299	629.249	996.618	1578.46	2500
0	0.0249423	0.0283266	0.0323402	0.0360464	0.0318243	0.0336691	0.0364756	0.0380583
0.1	0.037689	0.042885	0.0488013	0.0520514	0.0479036	0.0471793	0.0506213	0.0533514
0.2	0.05246	0.0595855	0.0675054	0.0711105	0.0639582	0.0654192	0.0667419	0.0714138
0.3	0.0693172	0.078269	0.0877201	0.0909558	0.0848642	0.0832855	0.0881019	0.0893132
0.4	0.0887003	0.100578	0.108306	0.111946	0.104625	0.101585	0.106792	0.109745
0.5	0.109464	0.120494	0.129611	0.133956	0.125118	0.124216	0.126166	0.13063
0.6	0.129425	0.140009	0.152597	0.155341	0.149233	0.145797	0.147054	0.151274
0.7	0.148686	0.163808	0.175257	0.177477	0.170836	0.167617	0.169371	0.173226
0.8	0.171821	0.184978	0.197935	0.199704	0.19504	0.18595	0.188604	0.194735
0.9	0.191433	0.205762	0.220385	0.223251	0.216105	0.20842	0.210849	0.214502
1	0.210463	0.225521	0.241179	0.244483	0.238332	0.230651	0.232378	0.237149
1.1	0.230599	0.246864	0.262224	0.267512	0.256846	0.250859	0.24972	0.256904
1.2	0.249968	0.265674	0.28391	0.288577	0.280146	0.26956	0.270992	0.27912
1.3	0.268839	0.285476	0.303738	0.304242	0.301861	0.291085	0.2901	0.298181
1.4	0.285024	0.302579	0.322125	0.32742	0.319892	0.309353	0.308247	0.318033
1.5	0.303468	0.323159	0.340891	0.346233	0.338846	0.326446	0.327756	0.335674
1.6	0.32196	0.340705	0.356597	0.361149	0.357575	0.346803	0.345618	0.354552
1.7	0.336561	0.356669	0.373813	0.376983	0.374296	0.365026	0.362046	0.369925
1.8	0.352715	0.37197	0.391838	0.396002	0.389799	0.377998	0.378295	0.390464
1.9	0.367897	0.386673	0.40489	0.41327	0.406578	0.393891	0.394789	0.404828
2	0.381698	0.402851	0.42125	0.425357	0.423881	0.412942	0.411186	0.422276
2.1	0.393196	0.416745	0.433848	0.442641	0.438597	0.430464	0.428586	0.439688
2.2	0.409967	0.428107	0.451335	0.454498	0.454218	0.441211	0.443052	0.457404
2.3	0.420707	0.445027	0.463708	0.471678	0.468436	0.458079	0.455392	0.469721
2.4	0.436803	0.455012	0.47617	0.484459	0.48144	0.469973	0.473054	0.484643
2.5	0.451137	0.469348	0.491387	0.496998	0.494061	0.485198	0.484798	0.498595
2.6	0.461331	0.481114	0.502439	0.506841	0.506929	0.496735	0.495817	0.513492
2.7	0.470099	0.491721	0.513673	0.521721	0.519515	0.509216	0.514579	0.528952
2.8	0.484579	0.503706	0.529263	0.531139	0.533246	0.521552	0.524303	0.540947
2.9	0.496145	0.516971	0.535029	0.542163	0.545733	0.536069	0.537716	0.556443
3	0.506199	0.526304	0.54967	0.553713	0.554412	0.547126	0.548797	0.566055
3.1	0.515875	0.536542	0.554945	0.563797	0.566822	0.556959	0.560595	0.579874
3.2	0.525817	0.544654	0.568754	0.574363	0.576963	0.566389	0.572658	0.591897
3.3	0.53596	0.556579	0.580262	0.585083	0.589435	0.579297	0.58186	0.603647
3.4	0.54663	0.565875	0.587569	0.596366	0.596381	0.589761	0.592167	0.616569
3.5	0.553019	0.571125	0.596701	0.600611	0.606686	0.603021	0.604776	0.62627
3.6	0.563785	0.584099	0.605446	0.613878	0.61764	0.605785	0.613892	0.637869
3.7	0.573585	0.592567	0.614377	0.619691	0.627229	0.617355	0.621338	0.648674
3.8	0.580347	0.601629	0.622724	0.630834	0.63036	0.63057	0.634064	0.662943
3.9	0.589266	0.610774	0.632458	0.636666	0.642165	0.639132	0.642716	0.668234
4	0.600289	0.617937	0.639891	0.64712	0.648645	0.642679	0.655356	0.680552
4.1	0.605974	0.62597	0.648306	0.653205	0.660492	0.652281	0.661763	0.689049
4.2	0.613758	0.637013	0.655876	0.660741	0.664992	0.664202	0.6692	0.697954
4.3	0.62348	0.64135	0.664621	0.668131	0.671687	0.671315	0.675525	0.707492
4.4	0.628036	0.648913	0.668971	0.681784	0.678414	0.680909	0.683269	0.714665
4.5	0.636565	0.653888	0.677229	0.686309	0.688752	0.684512	0.693092	0.730457
4.6	0.643686	0.660453	0.683651	0.693078	0.695261	0.693172	0.700312	0.732543
4.7	0.648117	0.668608	0.686171	0.697485	0.702436	0.699784	0.707446	0.739079
4.8	0.65927	0.673441	0.697595	0.706844	0.708222	0.705775	0.714357	0.747205
4.9	0.66148	0.681094	0.703344	0.710653	0.71796	0.715525	0.721883	0.75768
5	0.670141	0.686109	0.708771	0.716982	0.724244	0.721745	0.732415	0.766565
5.1	0.675925	0.696076	0.715024	0.721959	0.729093	0.727731	0.739041	0.773769
5.2	0.678895	0.701324	0.721008	0.73166	0.736528	0.737554	0.745979	0.778468
5.3	0.687374	0.707	0.729809	0.736555	0.743581	0.742098	0.747717	0.785527
5.4	0.692407	0.709196	0.734066	0.740878	0.743705	0.748301	0.755542	0.788839
5.5	0.696406	0.718833	0.739004	0.748602	0.752902	0.751673	0.765707	0.801045
5.6	0.704392	0.720969	0.741994	0.754006	0.75588	0.760373	0.772376	0.806629
5.7	0.707015	0.728728	0.749937	0.756245	0.764539	0.761177	0.77437	0.812601
5.8	0.713672	0.73347	0.755024	0.762226	0.769518	0.770853	0.780628	0.818961
5.9	0.72152	0.737911	0.758356	0.769357	0.77613	0.7727	0.790323	0.825393
6	0.723532	0.74219	0.764498	0.772702	0.778474	0.781161	0.793039	0.833355
6.1	0.731623	0.745096	0.770269	0.774318	0.780018	0.782636	0.794772	0.838016
6.2	0.735069	0.753111	0.773204	0.781629	0.791949	0.788619	0.801784	0.841339
6.3	0.740861	0.757267	0.779023	0.786378	0.794607	0.793466	0.807399	0.845608
6.4	0.744367	0.762021	0.777874	0.786153	0.796797	0.795137	0.81417	0.85269
6.5	0.747265	0.766004	0.787956	0.793757	0.79984	0.804454	0.819258	0.856231
6.6	0.748373	0.774654	0.791483	0.798586	0.805494	0.80515	0.823196	0.863625
6.7	0.755542	0.770891	0.794747	0.800416	0.806196	0.812996	0.825278	0.866669
6.8	0.762611	0.7766	0.797347	0.804869	0.812116	0.815627	0.829471	0.872913
6.9	0.765317	0.779661	0.80088	0.808311	0.817168	0.819318	0.835338	0.876809
7	0.76639	0.786588	0.803132	0.813456	0.822001	0.822764	0.839684	0.882007
7.1	0.771885	0.792298	0.809343	0.818328	0.826807	0.826856	0.843206	0.88158
7.2	0.777744	0.79152	0.815208	0.820821	0.827197	0.82885	0.848866	0.88911
7.3	0.774853	0.794675	0.815249	0.819374	0.833448	0.837507	0.848701	0.895945
7.4	0.782867	0.800214	0.818099	0.824756	0.837488	0.838334	0.855594	0.895177
7.5	0.786572	0.804768	0.824923	0.830342	0.834888	0.838786	0.859686	0.9008
7.6	0.787541	0.809688	0.824898	0.832337	0.836504	0.8436	0.860633	0.902397
7.7	0.79094	0.809411	0.827449	0.835922	0.841852	0.847734	0.86248	0.907581
7.8	0.794223	0.814768	0.833185	0.837207	0.846931	0.852961	0.870674	0.905608
7.9	0.796262	0.813563	0.836337	0.83931	0.85002	0.857909	0.874174	0.911698
8	0.800094	0.820381	0.83814	0.849506	0.855955	0.858788	0.874186	0.918883
8.1	0.798198	0.821634	0.838838	0.843823	0.856481	0.861353	0.885247	0.92359
8.2	0.804058	0.821832	0.840895	0.847581	0.857007	0.862853	0.878749	0.925674
8.3	0.804357	0.826642	0.847195	0.854017	0.860449	0.866586	0.884727	0.929779
8.4	0.812447	0.826229	0.84841	0.852133	0.862364	0.869723	0.887837	0.929496
8.5	0.812185	0.83055	0.84839	0.858128	0.863854	0.871099	0.890398	0.933089
8.6	0.809793	0.831017	0.851328	0.85795	0.865895	0.876675	0.894368	0.937222
8.7	0.818769	0.83832	0.850798	0.862022	0.871657	0.876892	0.898865	0.940596
8.8	0.819688	0.83814	0.855691	0.864327	0.871634	0.881242	0.896219	0.942684
8.9	0.823163	0.841477	0.85717	0.862346	0.87527	0.881531	0.905695	0.943359
9	0.822979	0.841033	0.864236	0.865004	0.877604	0.884892	0.905623	0.943165
9.1	0.826326	0.847288	0.861628	0.867779	0.882802	0.886655	0.902705	0.947375
9.2	0.826778	0.844803	0.864684	0.868241	0.879583	0.888747	0.906048	0.951838
9.3	0.831586	0.850377	0.863596	0.874566	0.885138	0.892212	0.912003	0.953143
9.4	0.832744	0.849871	0.867961	0.874356	0.88359	0.895074	0.911859	0.957381
9.5	0.833239	0.853458	0.870387	0.873547	0.883309	0.897387	0.911797	0.958048
9.6	0.833103	0.853852	0.871522	0.878518	0.889275	0.89651	0.917767	0.961151
9.7	0.837554	0.855272	0.87046	0.882721	0.887276	0.898636	0.919546	0.961261
9.8	0.839118	0.855284	0.87377	0.883268	0.896357	0.901256	0.922882	0.964286
9.9	0.839157	0.856599	0.871745	0.879752	0.890922	0.903225	0.923611	0.962315
10	0.840594	0.862011	0.881153	0.884597	0.897354	0.905903	0.923867	0.967109
10.1	0.841619	0.863177	0.879048	0.887096	0.89534	0.906502	0.925363	0.966562
10.2	0.841103	0.86424	0.877274	0.887845	0.900061	0.909876	0.928145	0.971451
10.3	0.847847	0.859975	0.883283	0.891349	0.899277	0.908066	0.928869	0.970468
10.4	0.849279	0.867432	0.88801	0.886302	0.900144	0.909981	0.930425	0.969954
10.5	0.847956	0.864195	0.883324	0.892631	0.900334	0.914141	0.932001	0.973454
10.6	0.848202	0.867016	0.885154	0.895447	0.902257	0.91234	0.93021	0.973382
10.7	0.849102	0.863885	0.885773	0.89431	0.904341	0.915082	0.934938	0.972965
10.8	0.853171	0.870837	0.889674	0.895581	0.904211	0.91444	0.936003	0.981112
10.9	0.851343	0.864347	0.888623	0.896017	0.903078	0.916721	0.937734	0.978677
11	0.851784	0.872486	0.890961	0.895936	0.905984	0.919455	0.936477	0.983522
11.1	0.8558	0.872284	0.887618	0.893091	0.909785	0.9221	0.939428	0.983846
11.2	0.859694	0.872014	0.892451	0.899835	0.907977	0.926184	0.943411	0.982121
11.3	0.853955	0.876126	0.890447	0.901244	0.91294	0.925204	0.93792	0.984664
11.4	0.859368	0.874329	0.893464	0.903322	0.908677	0.923724	0.943586	0.983611
11.5	0.86158	0.878516	0.898272	0.903289	0.912775	0.924861	0.945747	0.984891
11.6	0.859496	0.875874	0.897129	0.900109	0.912468	0.928563	0.940256	0.983192
11.7	0.859797	0.879298	0.895745	0.899861	0.912897	0.926029	0.946646	0.983124
11.8	0.861776	0.878093	0.89767	0.903452	0.917674	0.926539	0.939075	0.986909
11.9	0.864828	0.878014	0.895394	0.904364	0.915565	0.925024	0.945899	0.989839
12	0.860389	0.879878	0.893503	0.907408	0.915881	0.930924	0.947996	0.990856
12.1	0.864358	0.876516	0.897069	0.904581	0.913766	0.930295	0.94902	0.988981
12.2	0.862577	0.881597	0.896964	0.907709	0.918097	0.931774	0.950353	0.989142
12.3	0.864104	0.880757	0.898875	0.907412	0.919376	0.933442	0.951302	0.989115
12.4	0.864989	0.881762	0.900191	0.903813	0.920885	0.936964	0.951302	0.988384
12.5	0.866613	0.880493	0.898489	0.906981	0.916774	0.935662	0.950344	0.996884
12.6	0.86235	0.884244	0.897773	0.908962	0.921939	0.936989	0.952786	0.990962
12.7	0.863534	0.881935	0.900427	0.909366	0.920088	0.934909	0.953258	0.992464
12.8	0.865833	0.884092	0.900771	0.914022	0.922049	0.935088	0.955361	0.990877
12.9	0.862802	0.883132	0.900437	0.91052	0.92474	0.935592	0.955446	0.993229
13	0.865373	0.883799	0.901262	0.911087	0.92455	0.932825	0.953902	0.994868
13.1	0.865109	0.883654	0.898877	0.90931	0.924358	0.936964	0.957827	0.997026
13.2	0.867998	0.885724	0.907715	0.909021	0.923182	0.939461	0.955848	0.994014
13.3	0.866006	0.886033	0.90325	0.913652	0.923805	0.939178	0.958155	0.995138
13.4	0.870497	0.887742	0.907346	0.913433	0.92513	0.940772	0.95636	0.997712
13.5	0.86702	0.884872	0.905606	0.912488	0.928332	0.940225	0.958597	0.99623
13.6	0.8652	0.882682	0.907319	0.910753	0.924393	0.943493	0.953685	0.994329
13.7	0.868047	0.88664	0.90209	0.913312	0.925538	0.939812	0.956638	0.995943
13.8	0.867796	0.882651	0.90444	0.914663	0.928609	0.941871	0.955685	0.996523
13.9	0.868588	0.886331	0.906166	0.910227	0.930338	0.941306	0.961469	0.996013
14	0.870326	0.889176	0.908629	0.917362	0.926506	0.93865	0.957567	0.99417
14.1	0.864692	0.884257	0.906974	0.913223	0.929183	0.943764	0.956834	0.998632
14.2	0.868695	0.886791	0.906161	0.911215	0.924746	0.941351	0.958819	0.993163
14.3	0.868689	0.885837	0.90522	0.914589	0.930833	0.944892	0.957515	0.995435
14.4	0.865767	0.882622	0.909577	0.919746	0.928343	0.945338	0.953753	1
14.5	0.866888	0.88405	0.905897	0.910765	0.927379	0.940216	0.952672	0.997229
14.6	0.87085	0.883858	0.907313	0.913303	0.927579	0.944665	0.957051	0.996843
14.7	0.869242	0.885598	0.909189	0.912713	0.928109	0.94183	0.958029	0.998968
14.8	0.863805	0.884424	0.902183	0.914711	0.929133	0.941543	0.958314	0.997458
14.9	0.866941	0.878891	0.907779	0.912575	0.931339	0.942237	0.96	0.996533
15	0.866454	0.883237	0.907944	0.914554	0.929381	0.939046	0.958345	0.998205
15.1	0.86528	0.883192	0.907567	0.915084	0.926752	0.941065	0.957682	0.99657
15.2	0.866134	0.880858	0.902437	0.912651	0.928118	0.943033	0.959278	0.998254
15.3	0.868002	0.88437	0.903689	0.913062	0.929637	0.942158	0.958062	0.996337
15.4	0.86573	0.889513	0.902657	0.91469	0.930427	0.941192	0.956477	0.999827
15.5	0.86412	0.884956	0.906719	0.910253	0.927647	0.943262	0.957881	0.995043
15.6	0.866126	0.879729	0.906731	0.913858	0.925951	0.942887	0.958015	0.99844
15.7	0.865689	0.882214	0.905965	0.913262	0.930668	0.942858	0.956087	0.998374
15.8	0.863668	0.884098	0.903083	0.916785	0.929379	0.94514	0.961186	0.994837
15.9	0.86508	0.882399	0.905561	0.911015	0.929806	0.943566	0.953442	0.991987
16	0.867222	0.878609	0.903109	0.912955	0.92766	0.940227	0.952614	0.995625
16.1	0.869025	0.880899	0.905423	0.912152	0.927127	0.940192	0.956496	0.995834
16.2	0.863204	0.883995	0.902201	0.912887	0.929975	0.942294	0.958138	0.994032
16.3	0.864118	0.879886	0.902517	0.91312	0.925126	0.940596	0.95567	0.993615
16.4	0.867703	0.879717	0.90384	0.913991	0.924923	0.945204	0.95476	0.996048
16.5	0.862566	0.878002	0.900941	0.913153	0.929812	0.940466	0.954484	0.993861
16.6	0.865579	0.879742	0.901275	0.914399	0.928169	0.935625	0.958939	0.995592
16.7	0.862657	0.878439	0.90346	0.914249	0.92761	0.938299	0.954709	0.996888
16.8	0.863794	0.880881	0.901584	0.913386	0.924337	0.943731	0.951457	0.991083
16.9	0.860247	0.878528	0.90267	0.912284	0.922651	0.940126	0.954478	0.99382
17	0.861776	0.877238	0.899482	0.911997	0.924484	0.936787	0.953566	0.988287
17.1	0.866776	0.876145	0.901896	0.91033	0.925324	0.941801	0.953937	0.989325
17.2	0.86235	0.878646	0.901038	0.912604	0.920468	0.936719	0.952724	0.989907
17.3	0.859756	0.874364	0.900383	0.910998	0.925569	0.939447	0.950462	0.992154
17.4	0.86254	0.881335	0.894465	0.911566	0.925716	0.936952	0.948312	0.990454
17.5	0.86047	0.873687	0.898565	0.910743	0.920107	0.936585	0.948923	0.988875
17.6	0.855825	0.87542	0.89268	0.908931	0.920963	0.937596	0.949482	0.989197
17.7	0.856731	0.876376	0.893623	0.910286	0.922585	0.938935	0.949641	0.984853
17.8	0.855474	0.874065	0.889801	0.907668	0.917492	0.938594	0.951919	0.989781
17.9	0.855699	0.869153	0.894104	0.909641	0.92061	0.934352	0.948867	0.988692
18	0.858928	0.873908	0.897045	0.908122	0.920538	0.936521	0.947519	0.987229
18.1	0.855519	0.870691	0.892327	0.904114	0.917878	0.937154	0.946572	0.985728
18.2	0.854892	0.870484	0.893489	0.905138	0.919923	0.931225	0.953642	0.984125
18.3	0.849968	0.869791	0.895637	0.906622	0.916989	0.931694	0.946566	0.981279
18.4	0.852509	0.872449	0.890342	0.905	0.917389	0.929141	0.945192	0.98747
18.5	0.854867	0.866337	0.896456	0.909215	0.918642	0.932418	0.944399	0.98462
18.6	0.851617	0.869153	0.891568	0.901483	0.915412	0.932247	0.944544	0.983277
18.7	0.847529	0.870957	0.893248	0.905575	0.914519	0.932505	0.942994	0.978097
18.8	0.849077	0.868829	0.892635	0.902156	0.913386	0.930223	0.942424	0.979162
18.9	0.85176	0.864684	0.8882	0.899919	0.913277	0.929174	0.943467	0.97612
19	0.851694	0.864475	0.887858	0.902212	0.914636	0.929795	0.94197	0.97791
19.1	0.851914	0.86657	0.888241	0.901749	0.913215	0.931438	0.943322	0.977672
19.2	0.847909	0.868266	0.889269	0.897224	0.913438	0.926527	0.940862	0.974086
19.3	0.848344	0.860522	0.884896	0.900681	0.909261	0.925223	0.943147	0.97878
19.4	0.848675	0.860072	0.883014	0.898345	0.91255	0.928881	0.938246	0.969614
19.5	0.848966	0.863243	0.884748	0.894789	0.91333	0.922278	0.935398	0.976861
19.6	0.844556	0.858633	0.884213	0.89541	0.909826	0.929079	0.938698	0.976052
19.7	0.846011	0.858623	0.879756	0.892662	0.907928	0.926376	0.935722	0.974849
19.8	0.843745	0.855251	0.882728	0.89313	0.907719	0.923584	0.940869	0.972697
19.9	0.843656	0.85936	0.884149	0.891409	0.904944	0.920701	0.933568	0.969829
20	0.842961	0.857443	0.88229	0.897946	0.904614	0.92521	0.930807	0.967598
20.1	0.840074	0.854603	0.879498	0.889383	0.901919	0.923326	0.936399	0.96813
20.2	0.841846	0.855164	0.878922	0.890949	0.907676	0.918264	0.934655	0.970838
20.3	0.840022	0.854205	0.875612	0.891869	0.90405	0.919828	0.932635	0.968401
20.4	0.836291	0.854118	0.877228	0.88883	0.90106	0.915747	0.928555	0.965056
20.5	0.836611	0.855621	0.876225	0.887814	0.90163	0.916508	0.934238	0.963607
20.6	0.838425	0.8534	0.871778	0.887942	0.89781	0.917899	0.929996	0.96155
20.7	0.838844	0.851824	0.873497	0.886163	0.904226	0.9171	0.931789	0.963669
20.8	0.83852	0.850274	0.878524	0.884319	0.9021	0.91729	0.92866	0.958083
20.9	0.835856	0.848136	0.873652	0.885061	0.900059	0.915889	0.926634	0.960495
21	0.834774	0.850881	0.871357	0.883016	0.900218	0.913483	0.920794	0.959723
21.1	0.835169	0.852199	0.871679	0.885187	0.901244	0.915146	0.926762	0.953875
21.2	0.832533	0.846555	0.869149	0.878572	0.896229	0.914469	0.927047	0.958351
21.3	0.833107	0.847802	0.871568	0.883093	0.89891	0.915557	0.92533	0.956471
21.4	0.832855	0.845542	0.869488	0.881923	0.899385	0.909484	0.919736	0.958365
21.5	0.828644	0.843615	0.868477	0.879684	0.8943	0.907666	0.924046	0.95884
21.6	0.827934	0.843912	0.869589	0.882478	0.896033	0.906869	0.921948	0.950342
21.7	0.827777	0.844349	0.867364	0.876004	0.894581	0.908832	0.922193	0.947509
21.8	0.827364	0.842762	0.863574	0.872835	0.889688	0.910074	0.919882	0.951512
21.9	0.826079	0.841442	0.86527	0.878951	0.889649	0.905788	0.922575	0.952418
22	0.82683	0.840319	0.86443	0.876704	0.889655	0.906155	0.918192	0.953398
22.1	0.823241	0.838689	0.862222	0.875175	0.889465	0.903797	0.919882	0.950569
22.2	0.82263	0.835274	0.859455	0.876694	0.889023	0.906463	0.91853	0.946393
22.3	0.819525	0.837102	0.862888	0.872536	0.889325	0.899329	0.914521	0.947325
22.4	0.822713	0.832682	0.859562	0.872509	0.888815	0.897577	0.915835	0.949548
22.5	0.820911	0.836273	0.859496	0.871359	0.883982	0.902119	0.913388	0.94612
22.6	0.820107	0.834461	0.860336	0.86625	0.882507	0.902422	0.912767	0.945095
22.7	0.815994	0.83585	0.857108	0.868413	0.883728	0.8969	0.906983	0.943993
22.8	0.819708	0.832451	0.858472	0.868305	0.883625	0.898794	0.91253	0.945505
22.9	0.817562	0.834145	0.854748	0.86722	0.881704	0.899473	0.909719	0.940388
23	0.81522	0.831972	0.851972	0.864395	0.882666	0.897521	0.908906	0.942769
23.1	0.815808	0.830635	0.850507	0.867364	0.884554	0.895214	0.909343	0.941595
23.2	0.814104	0.826846	0.853588	0.866264	0.879036	0.894023	0.90793	0.939401
23.3	0.816056	0.830121	0.85275	0.86729	0.880055	0.893458	0.905233	0.935926
23.4	0.811301	0.827552	0.84982	0.860856	0.877166	0.891343	0.901601	0.934519
23.5	0.810837	0.825074	0.848563	0.862306	0.875707	0.889562	0.901302	0.935747
23.6	0.810909	0.827927	0.851786	0.859795	0.874905	0.892719	0.90411	0.938609
23.7	0.813897	0.825189	0.850967	0.858235	0.875784	0.885532	0.901403	0.936502
23.8	0.807055	0.826074	0.845932	0.860753	0.874335	0.888586	0.902111	0.93363
23.9	0.806916	0.820901	0.843507	0.857626	0.870854	0.887789	0.901502	0.931572
24	0.807919	0.823022	0.844845	0.858392	0.872375	0.886756	0.896473	0.93156
24.1	0.80743	0.821826	0.845967	0.857193	0.866991	0.885321	0.899653	0.928361
24.2	0.806964	0.82081	0.841885	0.854492	0.872084	0.8834	0.895786	0.927709
24.3	0.804205	0.820606	0.845536	0.851291	0.869261	0.884851	0.893951	0.925639
24.4	0.805315	0.816297	0.840373	0.850431	0.86462	0.885697	0.897313	0.925637
24.5	0.803158	0.814789	0.840913	0.853697	0.86769	0.88195	0.897014	0.923004
24.6	0.802721	0.815352	0.837942	0.850012	0.863454	0.882428	0.893402	0.924746
24.7	0.799566	0.811695	0.841491	0.851066	0.863805	0.880148	0.890204	0.918739
24.8	0.80217	0.813274	0.836559	0.847286	0.858728	0.880881	0.888633	0.920223
24.9	0.797461	0.81307	0.83308	0.848208	0.860641	0.878549	0.888854	0.921126
25	0.797411	0.814409	0.834488	0.846925	0.861518	0.878188	0.887825	0.919731
25.1	0.797224	0.811402	0.834547	0.844407	0.862913	0.872397	0.884997	0.918539
25.2	0.794617	0.810022	0.832057	0.846454	0.861735	0.876454	0.885877	0.914715
25.3	0.79619	0.806951	0.829979	0.845596	0.856027	0.873664	0.885092	0.912862
25.4	0.794225	0.810428	0.83425	0.840982	0.858664	0.873068	0.889508	0.920057
25.5	0.793191	0.811549	0.828644	0.838695	0.855466	0.872498	0.881842	0.911913
25.6	0.792841	0.80768	0.825862	0.841039	0.855715	0.870266	0.884473	0.913939
25.7	0.788544	0.803179	0.828057	0.838274	0.853767	0.87178	0.8802	0.914641
25.8	0.792036	0.805078	0.825693	0.83741	0.850616	0.86911	0.87853	0.908173
25.9	0.789747	0.803501	0.82763	0.837374	0.853082	0.864733	0.880561	0.911064
26	0.785234	0.803652	0.824067	0.839151	0.850759	0.865718	0.877492	0.908235
26.1	0.787178	0.802143	0.822112	0.833429	0.850874	0.865625	0.876403	0.906783
26.2	0.785075	0.798722	0.816716	0.834048	0.851429	0.864252	0.870649	0.904174
26.3	0.781561	0.795263	0.81925	0.835243	0.845728	0.868959	0.87515	0.903609
26.4	0.78562	0.798208	0.815814	0.834993	0.847292	0.866529	0.873175	0.906564
26.5	0.78153	0.799395	0.817546	0.828697	0.848856	0.860276	0.871326	0.904304
26.6	0.784531	0.795206	0.815084	0.826762	0.842022	0.862703	0.875016	0.89989
26.7	0.780187	0.793051	0.818311	0.828053	0.843351	0.859069	0.872214	0.898757
26.8	0.777746	0.79067	0.816231	0.827529	0.843547	0.859137	0.871615	0.896725
26.9	0.781103	0.79204	0.816095	0.828679	0.842465	0.859327	0.867416	0.895974
27	0.777211	0.789207	0.80976	0.824294	0.83789	0.85014	0.863914	0.894517
27.1	0.778035	0.789392	0.808121	0.825202	0.837694	0.854711	0.866145	0.897133
27.2	0.774087	0.79184	0.811598	0.822548	0.839302	0.853679	0.867983	0.893359
27.3	0.776039	0.788877	0.809254	0.822727	0.836116	0.853916	0.863538	0.895189
27.4	0.773055	0.789675	0.812224	0.821396	0.837692	0.854698	0.86215	0.892125
27.5	0.774881	0.786978	0.80664	0.821332	0.839019	0.851079	0.86191	0.888962
27.6	0.770422	0.785263	0.806157	0.817271	0.833782	0.850554	0.862304	0.887309
27.7	0.769669	0.787083	0.80314	0.818784	0.8315	0.849721	0.859869	0.889828
27.8	0.772642	0.784095	0.804085	0.81653	0.829131	0.845294	0.85403	0.884579
27.9	0.768189	0.779479	0.802655	0.817022	0.829209	0.841939	0.859124	0.881683
28	0.768404	0.781784	0.803635	0.815686	0.827218	0.844283	0.855443	0.881677
28.1	0.764174	0.782857	0.803839	0.815827	0.828672	0.845984	0.853594	0.880992
28.2	0.765839	0.780612	0.799442	0.813765	0.826842	0.842026	0.853221	0.886452
28.3	0.76255	0.775944	0.797395	0.813161	0.823357	0.842754	0.852418	0.880468
28.4	0.759931	0.777286	0.795678	0.808953	0.825938	0.843542	0.847862	0.877746
28.5	0.763949	0.774857	0.798499	0.80605	0.825476	0.838869	0.849504	0.878287
28.6	0.756968	0.772647	0.792779	0.812894	0.822098	0.837954	0.847288	0.877399
28.7	0.761567	0.771809	0.795397	0.813827	0.822626	0.834834	0.846601	0.873421
28.8	0.761138	0.773604	0.790905	0.806671	0.817207	0.837835	0.847616	0.872375
28.9	0.757841	0.77067	0.792141	0.808959	0.818738	0.834145	0.844444	0.872203
29	0.755552	0.769846	0.791718	0.801634	0.818454	0.835266	0.845627	0.865779
29.1	0.755529	0.770779	0.790323	0.801945	0.816239	0.831663	0.846541	0.867381
29.2	0.756018	0.766902	0.78984	0.803107	0.817086	0.829232	0.841508	0.869921
29.3	0.755486	0.766047	0.788844	0.796431	0.814351	0.829304	0.839005	0.866101
29.4	0.752843	0.767492	0.791365	0.799496	0.813466	0.826033	0.839834	0.868741
29.5	0.752261	0.765276	0.784463	0.79841	0.814981	0.827872	0.837742	0.863435
29.6	0.750309	0.763724	0.785059	0.794463	0.811673	0.828934	0.839106	0.863893
29.7	0.749943	0.760226	0.785969	0.796109	0.810534	0.825942	0.838293	0.865755
29.8	0.747713	0.761697	0.783928	0.794	0.81244	0.82574	0.832302	0.86598
29.9	0.749782	0.758171	0.781442	0.794979	0.810598	0.821881	0.83637	0.861535

## Sheet: DL n=1
x correct	18.1333	16.4	14.6667	12.9333	11.2	9.46663	7.73329	5.99995
time	100	169.381	286.901	485.956	823.119	1394.21	2361.53	4000
0	0.00499035	0.00727221	0.00652883	0.00754694	0.00732716	0.00966073	0.00915652	0.0110376
0.1	0.00704273	0.00929873	0.0102005	0.0116969	0.011183	0.0134132	0.0127959	0.0155011
0.2	0.0100971	0.0137138	0.0150098	0.0176181	0.0175567	0.0208923	0.0205464	0.0248419
0.3	0.0145606	0.0203945	0.0220558	0.0253784	0.0267165	0.0313707	0.0309214	0.0366358
0.4	0.0200939	0.0277378	0.0321367	0.0357825	0.0367683	0.0443508	0.0439694	0.0527348
0.5	0.0260539	0.0360152	0.0428899	0.0503883	0.0513677	0.0601719	0.0610381	0.0720013
0.6	0.0346804	0.0465874	0.0555565	0.0635914	0.0656632	0.0771307	0.0789213	0.0946066
0.7	0.0424568	0.0586302	0.0698132	0.0781035	0.0831294	0.0964198	0.100495	0.115997
0.8	0.0522694	0.0717105	0.0868367	0.0964457	0.100088	0.1192	0.122923	0.141129
0.9	0.0625184	0.084293	0.101539	0.11407	0.119306	0.140457	0.143999	0.166298
1	0.0723504	0.0956829	0.118369	0.132264	0.139284	0.161682	0.166146	0.194947
1.1	0.0843059	0.111426	0.13537	0.149307	0.159837	0.182691	0.189982	0.21963
1.2	0.0969725	0.127067	0.15197	0.171159	0.178809	0.208056	0.215716	0.244931
1.3	0.105841	0.142393	0.168815	0.189856	0.201511	0.228761	0.239863	0.27529
1.4	0.119145	0.156986	0.188134	0.210616	0.220587	0.252216	0.263858	0.295866
1.5	0.132057	0.173172	0.208237	0.227333	0.241276	0.271483	0.286506	0.322537
1.6	0.145835	0.189433	0.224026	0.249873	0.2605	0.296962	0.310275	0.348859
1.7	0.158673	0.203767	0.238965	0.268855	0.276725	0.316412	0.332334	0.373614
1.8	0.172878	0.21805	0.258538	0.285772	0.297107	0.334017	0.351309	0.397903
1.9	0.187232	0.235645	0.278083	0.306263	0.317986	0.356891	0.375256	0.418698
2	0.200186	0.251024	0.293755	0.325679	0.335175	0.37373	0.395699	0.436956
2.1	0.212901	0.26765	0.312841	0.338811	0.353016	0.392457	0.414581	0.462984
2.2	0.228309	0.28074	0.328594	0.356009	0.369205	0.409991	0.431562	0.480367
2.3	0.240012	0.2934	0.338979	0.376222	0.387037	0.425796	0.454578	0.501886
2.4	0.252753	0.309295	0.359955	0.388711	0.404891	0.443	0.47195	0.52005
2.5	0.267992	0.321829	0.374309	0.405605	0.416093	0.458149	0.486459	0.537656
2.6	0.280326	0.339373	0.389115	0.42034	0.434972	0.476614	0.499281	0.554275
2.7	0.290507	0.350999	0.401271	0.43365	0.451119	0.495874	0.514866	0.569353
2.8	0.305148	0.36777	0.417344	0.450334	0.461107	0.506181	0.536178	0.588024
2.9	0.318607	0.381022	0.424481	0.462228	0.476039	0.51846	0.544627	0.598509
3	0.331532	0.392945	0.438256	0.478211	0.486776	0.530315	0.56232	0.616047
3.1	0.340689	0.403042	0.452706	0.488418	0.500422	0.545972	0.574136	0.626418
3.2	0.349212	0.414403	0.466385	0.503702	0.512167	0.560096	0.585694	0.644014
3.3	0.364748	0.424445	0.475047	0.516017	0.524414	0.570791	0.601224	0.655339
3.4	0.372117	0.439128	0.489659	0.525629	0.535267	0.577979	0.610953	0.663067
3.5	0.387942	0.45131	0.499294	0.533932	0.549197	0.588015	0.618432	0.679157
3.6	0.394677	0.460066	0.510758	0.548241	0.552439	0.602886	0.633203	0.689696
3.7	0.41034	0.469924	0.51899	0.56017	0.567446	0.614993	0.640207	0.701891
3.8	0.417855	0.48068	0.530348	0.568474	0.578577	0.618978	0.65245	0.715424
3.9	0.427509	0.49112	0.535115	0.577465	0.584456	0.633054	0.66276	0.725046
4	0.440693	0.504061	0.54721	0.58733	0.59764	0.643261	0.674729	0.73214
4.1	0.44505	0.509284	0.555076	0.59572	0.604699	0.650233	0.680617	0.744584
4.2	0.454927	0.518431	0.565125	0.606231	0.611548	0.661387	0.690779	0.748724
4.3	0.465725	0.526589	0.572501	0.611622	0.616897	0.662951	0.69936	0.761187
4.4	0.478292	0.540658	0.585326	0.622521	0.629269	0.674467	0.70362	0.766284
4.5	0.485677	0.545319	0.591706	0.630665	0.636942	0.681914	0.711536	0.775399
4.6	0.491414	0.555112	0.598008	0.637637	0.645158	0.691015	0.72321	0.78439
4.7	0.500422	0.560655	0.608642	0.643435	0.652139	0.69235	0.72831	0.790951
4.8	0.508774	0.568318	0.612954	0.648752	0.660042	0.702741	0.734293	0.800622
4.9	0.518408	0.572255	0.623432	0.658807	0.666134	0.710246	0.743362	0.810237
5	0.524129	0.584143	0.628729	0.663953	0.67245	0.715262	0.752118	0.817855
5.1	0.528858	0.591263	0.639483	0.673403	0.678158	0.720863	0.760424	0.823861
5.2	0.535881	0.597213	0.642479	0.680449	0.693329	0.730676	0.762412	0.827002
5.3	0.544763	0.602711	0.644628	0.684887	0.693756	0.733772	0.770392	0.831236
5.4	0.553056	0.612252	0.655252	0.691952	0.699105	0.738721	0.776184	0.844456
5.5	0.558645	0.619518	0.662059	0.69406	0.700301	0.745793	0.78439	0.847051
5.6	0.565203	0.624802	0.66065	0.703378	0.708691	0.749881	0.786019	0.855503
5.7	0.571583	0.633526	0.668035	0.707997	0.716875	0.758249	0.796898	0.858447
5.8	0.574359	0.631764	0.67957	0.715492	0.714939	0.76513	0.797147	0.866534
5.9	0.58507	0.643303	0.679638	0.719373	0.723724	0.764568	0.802587	0.86953
6	0.58752	0.645287	0.687469	0.724774	0.728572	0.770987	0.803498	0.879288
6.1	0.592013	0.651616	0.692609	0.729813	0.729774	0.774962	0.810224	0.878687
6.2	0.60243	0.65916	0.697431	0.738155	0.734432	0.779196	0.820945	0.883376
6.3	0.607317	0.661238	0.701248	0.736604	0.741087	0.783262	0.8207	0.886977
6.4	0.609162	0.667292	0.706051	0.744535	0.74609	0.789064	0.825044	0.895762
6.5	0.615604	0.671409	0.711655	0.745987	0.750618	0.792176	0.823014	0.904466
6.6	0.620575	0.677023	0.712379	0.756766	0.75322	0.800231	0.837154	0.901942
6.7	0.624282	0.679586	0.721361	0.756811	0.756009	0.804911	0.834038	0.906735
6.8	0.635148	0.686219	0.718921	0.763744	0.760867	0.805583	0.84016	0.913622
6.9	0.634861	0.689163	0.723682	0.763029	0.769603	0.810557	0.846392	0.91645
7	0.641499	0.694461	0.732211	0.773708	0.771333	0.810987	0.849346	0.922081
7.1	0.643061	0.699858	0.732092	0.772868	0.772118	0.818075	0.853919	0.919291
7.2	0.646264	0.701461	0.737593	0.772839	0.779891	0.819633	0.856915	0.926838
7.3	0.65084	0.704112	0.736539	0.776924	0.776607	0.822464	0.866191	0.9269
7.4	0.656988	0.708375	0.746862	0.779093	0.779374	0.82759	0.865926	0.930649
7.5	0.658167	0.712573	0.748327	0.786514	0.7908	0.825189	0.868373	0.935041
7.6	0.662521	0.716474	0.754872	0.788776	0.790114	0.834165	0.867995	0.940274
7.7	0.668474	0.718582	0.753501	0.791908	0.791194	0.832697	0.870846	0.936738
7.8	0.67031	0.726681	0.761623	0.794268	0.791352	0.837723	0.872232	0.942365
7.9	0.671765	0.726355	0.761384	0.799083	0.798521	0.83877	0.877656	0.946531
8	0.678817	0.729619	0.763527	0.799093	0.800114	0.841944	0.880002	0.947934
8.1	0.678711	0.735091	0.762451	0.80259	0.803718	0.842248	0.886896	0.951939
8.2	0.685184	0.740589	0.769868	0.808757	0.806071	0.848909	0.884407	0.949124
8.3	0.688669	0.741998	0.766911	0.808773	0.808266	0.84698	0.890212	0.959153
8.4	0.69087	0.743491	0.776326	0.808673	0.810974	0.852882	0.895345	0.95296
8.5	0.692874	0.747221	0.782008	0.815929	0.811727	0.854924	0.899104	0.959861
8.6	0.697062	0.750987	0.784009	0.816999	0.818537	0.858515	0.895674	0.957236
8.7	0.697993	0.751559	0.776924	0.820965	0.821058	0.856805	0.896748	0.962395
8.8	0.698064	0.753634	0.782092	0.820205	0.82175	0.860296	0.903713	0.961037
8.9	0.700656	0.757554	0.785046	0.82441	0.823137	0.862591	0.9007	0.965026
9	0.702845	0.756785	0.780696	0.824879	0.826049	0.861327	0.906861	0.968752
9.1	0.70736	0.76364	0.787403	0.827468	0.829688	0.865406	0.903144	0.9684
9.2	0.713436	0.760331	0.791352	0.830671	0.826928	0.86952	0.902711	0.972291
9.3	0.717363	0.765938	0.79375	0.824643	0.830515	0.86964	0.908147	0.973529
9.4	0.715094	0.770024	0.793847	0.829672	0.82951	0.870348	0.917546	0.971344
9.5	0.720401	0.767208	0.796915	0.830515	0.835063	0.871305	0.915671	0.978051
9.6	0.718921	0.772962	0.797787	0.830784	0.83026	0.868544	0.914278	0.978688
9.7	0.730702	0.775062	0.803524	0.832015	0.831812	0.872271	0.913361	0.976603
9.8	0.726697	0.778033	0.802273	0.836876	0.833935	0.872336	0.916159	0.979266
9.9	0.728323	0.776572	0.806653	0.835761	0.838735	0.878767	0.921628	0.975998
10	0.728737	0.779503	0.801032	0.840373	0.837322	0.877252	0.921871	0.983245
10.1	0.728566	0.781679	0.80707	0.839494	0.835335	0.87539	0.915998	0.983439
10.2	0.734118	0.787251	0.80323	0.845338	0.843761	0.876188	0.923238	0.982298
10.3	0.730065	0.787309	0.810806	0.845713	0.843993	0.885034	0.92071	0.984602
10.4	0.73831	0.786827	0.8124	0.847128	0.840729	0.882675	0.92486	0.984757
10.5	0.738052	0.788001	0.813282	0.845975	0.842881	0.886133	0.927023	0.985556
10.6	0.738181	0.790922	0.815625	0.845474	0.846169	0.885603	0.926218	0.987763
10.7	0.739125	0.788893	0.814746	0.850247	0.84994	0.888916	0.928435	0.984964
10.8	0.741727	0.792713	0.822367	0.848266	0.847675	0.887323	0.929204	0.986975
10.9	0.742703	0.79366	0.816456	0.854523	0.853958	0.887168	0.934027	0.990339
11	0.746623	0.795237	0.816805	0.852911	0.85283	0.893212	0.927701	0.996629
11.1	0.748456	0.790509	0.819588	0.852015	0.854139	0.893364	0.924114	0.994402
11.2	0.743081	0.799474	0.819352	0.855755	0.85167	0.885015	0.929039	0.993617
11.3	0.747393	0.796824	0.816847	0.853499	0.853961	0.888483	0.929738	0.991904
11.4	0.748359	0.798515	0.811407	0.852196	0.852006	0.891447	0.932795	0.992812
11.5	0.748226	0.80091	0.81985	0.855755	0.853237	0.886906	0.934621	0.992207
11.6	0.753437	0.801653	0.821411	0.857723	0.859291	0.894065	0.934049	0.996522
11.7	0.755579	0.803986	0.825202	0.857798	0.853046	0.892077	0.937779	0.997324
11.8	0.75449	0.807425	0.824533	0.856236	0.853951	0.892591	0.936771	0.996015
11.9	0.752195	0.808576	0.827002	0.855871	0.853299	0.894369	0.937882	0.991946
12	0.755162	0.805703	0.822173	0.857196	0.858205	0.897375	0.935775	0.997317
12.1	0.756497	0.807477	0.823728	0.859708	0.85869	0.894071	0.933319	0.996632
12.2	0.754956	0.807031	0.82601	0.861505	0.85997	0.891793	0.936732	0.997178
12.3	0.758091	0.811937	0.823285	0.856253	0.85539	0.894763	0.934912	0.999958
12.4	0.760195	0.808017	0.829737	0.855823	0.863082	0.899029	0.934515	0.999622
12.5	0.759684	0.806346	0.828841	0.857397	0.858357	0.895788	0.934366	0.998536
12.6	0.762761	0.808447	0.827264	0.856847	0.857565	0.897892	0.936428	0.996125
12.7	0.75863	0.804882	0.833376	0.858021	0.859252	0.897491	0.936292	0.999842
12.8	0.76598	0.811255	0.827439	0.862749	0.86517	0.897287	0.93848	0.994958
12.9	0.764506	0.81344	0.824769	0.855917	0.859627	0.896379	0.937262	0.993588
13	0.765175	0.809594	0.826062	0.863098	0.858987	0.896195	0.9404	0.998387
13.1	0.761252	0.808948	0.8311	0.861175	0.865335	0.894653	0.942013	0.99671
13.2	0.766239	0.810085	0.83017	0.856789	0.866424	0.898793	0.936683	0.998093
13.3	0.766698	0.812083	0.830276	0.855244	0.861366	0.898949	0.941619	0.997376
13.4	0.766152	0.814452	0.827988	0.8558	0.86188	0.900561	0.936981	0.99714
13.5	0.769458	0.812383	0.831462	0.856928	0.860128	0.894433	0.937485	0.995136
13.6	0.76908	0.808621	0.831249	0.855813	0.861007	0.898797	0.938008	0.992889
13.7	0.767241	0.812703	0.825435	0.856013	0.860257	0.896066	0.937343	1
13.8	0.766808	0.80652	0.830932	0.85901	0.858625	0.900128	0.935617	0.995488
13.9	0.770967	0.814003	0.82847	0.853021	0.858577	0.897213	0.938238	0.994531
14	0.769309	0.814148	0.831892	0.857012	0.859181	0.896605	0.937249	0.989832
14.1	0.763737	0.814239	0.830687	0.853961	0.860962	0.897116	0.932459	0.995469
14.2	0.76515	0.811857	0.825894	0.851915	0.858919	0.895077	0.936819	0.99308
14.3	0.769429	0.808447	0.826404	0.850299	0.856143	0.890619	0.934809	0.99329
14.4	0.771265	0.814067	0.83015	0.851789	0.863719	0.898771	0.935087	0.99499
14.5	0.768799	0.807833	0.830958	0.85518	0.855755	0.897122	0.935106	0.989648
14.6	0.767131	0.811553	0.826763	0.853101	0.861188	0.895927	0.938193	0.992686
14.7	0.770466	0.811123	0.821731	0.852167	0.859397	0.895086	0.932446	0.988772
14.8	0.766908	0.806562	0.825493	0.856072	0.859921	0.892106	0.935109	0.992637
14.9	0.765786	0.812629	0.831408	0.851615	0.859837	0.894517	0.931732	0.991984
15	0.769044	0.810412	0.826669	0.851508	0.859061	0.894925	0.9352	0.988675
15.1	0.767548	0.812713	0.829245	0.853984	0.859973	0.893638	0.938496	0.986849
15.2	0.764028	0.809988	0.827791	0.849562	0.860167	0.892394	0.935151	0.984987
15.3	0.770786	0.807005	0.826136	0.854048	0.855073	0.891444	0.930061	0.987928
15.4	0.77248	0.810292	0.831773	0.850587	0.85997	0.892985	0.929618	0.986393
15.5	0.774338	0.809736	0.827235	0.853344	0.860076	0.892413	0.927498	0.988882
15.6	0.771262	0.806272	0.828078	0.850558	0.856812	0.891104	0.930746	0.983629
15.7	0.768576	0.810102	0.820987	0.848732	0.856582	0.891373	0.93082	0.983413
15.8	0.768249	0.806233	0.824911	0.850251	0.855393	0.889676	0.930297	0.984069
15.9	0.771126	0.808683	0.830325	0.847894	0.857103	0.890975	0.937187	0.983238
16	0.771436	0.808275	0.824992	0.844326	0.856773	0.888874	0.930216	0.987644
16.1	0.774426	0.810851	0.82048	0.846692	0.850913	0.893952	0.928736	0.981254
16.2	0.76981	0.805816	0.820991	0.849543	0.851175	0.893829	0.934237	0.982543
16.3	0.768214	0.808476	0.825852	0.84943	0.854006	0.886515	0.930319	0.982401
16.4	0.768627	0.803851	0.825842	0.848829	0.850884	0.88964	0.927608	0.983562
16.5	0.765977	0.808466	0.827723	0.846631	0.847911	0.888056	0.930445	0.981205
16.6	0.771446	0.807674	0.826559	0.843906	0.848337	0.891557	0.92784	0.978012
16.7	0.766804	0.803786	0.827539	0.846476	0.850483	0.894091	0.927902	0.979105
16.8	0.767406	0.808919	0.821608	0.843382	0.85272	0.887122	0.926673	0.980165
16.9	0.763304	0.80354	0.822409	0.847093	0.85016	0.889672	0.925287	0.974269
17	0.767112	0.804019	0.819688	0.844549	0.845739	0.885859	0.927181	0.976887
17.1	0.76866	0.805186	0.818082	0.846078	0.846301	0.885474	0.926092	0.97519
17.2	0.768763	0.804407	0.817115	0.842313	0.853861	0.886421	0.924822	0.977718
17.3	0.771252	0.800625	0.819853	0.840829	0.846084	0.886237	0.92509	0.978351
17.4	0.767942	0.802833	0.823466	0.842419	0.850464	0.884624	0.9189	0.97107
17.5	0.767806	0.801443	0.8209	0.84228	0.8509	0.886269	0.923965	0.972702
17.6	0.766995	0.795615	0.812729	0.843612	0.847565	0.883864	0.915074	0.96849
17.7	0.76789	0.799565	0.817652	0.838483	0.850286	0.880694	0.919117	0.972227
17.8	0.766714	0.801178	0.817209	0.844275	0.845186	0.881861	0.920213	0.972036
17.9	0.770945	0.801058	0.817445	0.842794	0.844074	0.883774	0.912155	0.972928
18	0.76002	0.802778	0.814148	0.842839	0.841301	0.878835	0.917834	0.970468
18.1	0.762073	0.79791	0.821081	0.840868	0.84325	0.880716	0.913942	0.970714
18.2	0.76279	0.798505	0.81929	0.838841	0.839698	0.880988	0.917763	0.965969
18.3	0.769306	0.797157	0.816007	0.838263	0.842196	0.884407	0.912931	0.965611
18.4	0.76471	0.799232	0.815357	0.836181	0.838037	0.879104	0.912866	0.964958
18.5	0.764898	0.79685	0.817972	0.837503	0.836921	0.878102	0.915814	0.96435
18.6	0.757638	0.795538	0.810535	0.832807	0.84015	0.877158	0.908874	0.960562
18.7	0.766827	0.795179	0.811637	0.831976	0.841185	0.875089	0.904527	0.967437
18.8	0.765922	0.799277	0.80514	0.834339	0.83867	0.874055	0.910319	0.959162
18.9	0.756927	0.794038	0.807658	0.830894	0.841253	0.877361	0.912297	0.962773
19	0.761575	0.791284	0.811608	0.832885	0.833302	0.87654	0.911541	0.962181
19.1	0.763427	0.793472	0.807031	0.83346	0.833925	0.874281	0.909097	0.95914
19.2	0.759338	0.79291	0.812739	0.831168	0.832332	0.869078	0.907355	0.961606
19.3	0.763618	0.794339	0.811456	0.832232	0.836543	0.873722	0.904676	0.959402
19.4	0.761307	0.794313	0.80791	0.830648	0.83387	0.871149	0.903625	0.959647
19.5	0.759762	0.788679	0.807519	0.830667	0.834064	0.867329	0.904802	0.953632
19.6	0.756562	0.793647	0.805929	0.825179	0.831666	0.873609	0.904311	0.95828
19.7	0.756439	0.785344	0.806992	0.826769	0.830742	0.872575	0.900083	0.960255
19.8	0.757257	0.792913	0.801272	0.821378	0.829898	0.864242	0.903509	0.95563
19.9	0.75331	0.784377	0.803805	0.82494	0.832167	0.865551	0.899482	0.952944
20	0.758437	0.789064	0.806391	0.824607	0.827384	0.864514	0.903703	0.951955
20.1	0.749891	0.786514	0.801301	0.825942	0.824556	0.871518	0.90211	0.952007
20.2	0.752858	0.783495	0.802707	0.822112	0.827154	0.870842	0.897245	0.945775
20.3	0.757047	0.788295	0.802231	0.820764	0.830583	0.866505	0.895015	0.943739
20.4	0.753039	0.78483	0.801081	0.821065	0.83005	0.866857	0.899459	0.94508
20.5	0.74874	0.781992	0.798783	0.819733	0.830309	0.86367	0.897068	0.949363
20.6	0.752115	0.785172	0.799513	0.823651	0.823172	0.863131	0.894353	0.954301
20.7	0.750101	0.781352	0.800089	0.820764	0.825082	0.858706	0.892552	0.944314
20.8	0.748349	0.784277	0.799649	0.81495	0.824798	0.860383	0.897271	0.944864
20.9	0.750137	0.781659	0.798712	0.816065	0.825376	0.857743	0.892814	0.93903
21	0.749341	0.779701	0.795677	0.812063	0.821721	0.855477	0.8906	0.937811
21.1	0.75098	0.779759	0.797445	0.816718	0.819232	0.855555	0.893047	0.937688
21.2	0.750738	0.777228	0.793246	0.814465	0.818893	0.850118	0.8889	0.941564
21.3	0.749173	0.770812	0.789141	0.816433	0.819982	0.853825	0.891996	0.938225
21.4	0.744956	0.780722	0.791045	0.816249	0.820302	0.852578	0.89157	0.942304
21.5	0.75004	0.773139	0.789116	0.812749	0.819097	0.852591	0.884863	0.936506
21.6	0.744674	0.77813	0.788896	0.813508	0.815179	0.856304	0.88721	0.936344
21.7	0.742328	0.773433	0.789038	0.811314	0.815031	0.853502	0.886667	0.932608
21.8	0.743142	0.772781	0.791087	0.812965	0.81515	0.846307	0.886573	0.930685
21.9	0.737664	0.778534	0.790053	0.809391	0.811333	0.852649	0.88411	0.930387
22	0.744241	0.773172	0.78492	0.801724	0.817878	0.848774	0.880975	0.930445
22.1	0.740305	0.768653	0.787083	0.808301	0.809513	0.846149	0.883716	0.926796
22.2	0.741281	0.773401	0.786976	0.808107	0.811986	0.848221	0.883515	0.927494
22.3	0.738666	0.766795	0.782163	0.800577	0.809316	0.848366	0.875445	0.925484
22.4	0.742464	0.766019	0.780838	0.806113	0.809306	0.844785	0.878703	0.93328
22.5	0.744354	0.768825	0.78334	0.805832	0.806252	0.843318	0.875274	0.925966
22.6	0.740925	0.767121	0.780534	0.806262	0.805913	0.840871	0.878247	0.921538
22.7	0.736992	0.76662	0.781148	0.802076	0.806081	0.842264	0.869362	0.925836
22.8	0.730657	0.766866	0.784041	0.801459	0.807293	0.841156	0.872872	0.923959
22.9	0.739632	0.766113	0.781963	0.799365	0.806844	0.838369	0.877681	0.918512
23	0.733999	0.766097	0.780037	0.797548	0.804555	0.840655	0.87145	0.920148
23.1	0.736975	0.761753	0.781905	0.803259	0.806171	0.836437	0.873076	0.922517
23.2	0.734189	0.763117	0.780334	0.80079	0.804274	0.840221	0.871443	0.920481
23.3	0.732935	0.762189	0.775744	0.797021	0.800606	0.836954	0.873234	0.919964
23.4	0.732076	0.760205	0.776611	0.799038	0.804384	0.836547	0.869398	0.916237
23.5	0.73385	0.758149	0.774604	0.792435	0.801488	0.838919	0.864931	0.915768
23.6	0.730411	0.758162	0.772335	0.792251	0.796582	0.839449	0.866195	0.914692
23.7	0.731504	0.761662	0.774972	0.797057	0.796465	0.836527	0.869165	0.912556
23.8	0.729231	0.757286	0.769439	0.794012	0.799054	0.836113	0.864882	0.913574
23.9	0.724312	0.75895	0.770903	0.792112	0.79749	0.832274	0.866392	0.910658
24	0.729658	0.758892	0.770421	0.784203	0.799103	0.829484	0.863664	0.911667
24.1	0.731226	0.749196	0.768181	0.791769	0.798873	0.828793	0.864753	0.909052
24.2	0.727444	0.756707	0.765483	0.787981	0.793948	0.829953	0.857717	0.903545
24.3	0.722353	0.754228	0.768951	0.791556	0.795127	0.829956	0.865025	0.907465
24.4	0.727153	0.749545	0.764138	0.788611	0.794361	0.825777	0.858082	0.906085
24.5	0.723801	0.75481	0.76398	0.788156	0.790935	0.829494	0.858903	0.902943
24.6	0.719254	0.749519	0.763488	0.79045	0.787668	0.824517	0.857791	0.902009
24.7	0.727706	0.746727	0.762987	0.785825	0.789959	0.826727	0.858302	0.903532
24.8	0.721419	0.746361	0.76076	0.787306	0.785838	0.819917	0.858118	0.896114
24.9	0.725049	0.748588	0.76344	0.782522	0.784691	0.823725	0.852348	0.897265
25	0.720977	0.752224	0.76153	0.780754	0.786701	0.820971	0.854527	0.904314
25.1	0.723284	0.744416	0.755783	0.780748	0.786746	0.81602	0.853816	0.901573
25.2	0.720964	0.745712	0.760883	0.7776	0.787923	0.821149	0.854953	0.896192
25.3	0.717033	0.747053	0.758582	0.779678	0.781071	0.814517	0.844889	0.899039
25.4	0.721494	0.743032	0.756821	0.77939	0.778388	0.821844	0.850952	0.895542
25.5	0.716691	0.746714	0.753637	0.778989	0.77833	0.814921	0.844523	0.896334
25.6	0.712799	0.738976	0.753327	0.776963	0.781808	0.820557	0.849905	0.89442
25.7	0.712638	0.736898	0.755256	0.776381	0.781342	0.815428	0.852284	0.887704
25.8	0.712938	0.741911	0.753272	0.771119	0.779988	0.809067	0.847351	0.890119
25.9	0.711103	0.739387	0.75334	0.772095	0.775198	0.813078	0.845574	0.888632
26	0.709179	0.740557	0.752202	0.770644	0.778608	0.814856	0.843489	0.887061
26.1	0.714289	0.738029	0.750987	0.7696	0.772803	0.811663	0.84389	0.885875
26.2	0.707505	0.735838	0.751688	0.769442	0.775816	0.805072	0.842578	0.885083
26.3	0.711616	0.734241	0.746765	0.767073	0.774539	0.809003	0.842426	0.884866
26.4	0.711119	0.73641	0.74523	0.76918	0.771569	0.811533	0.843366	0.884165
26.5	0.709609	0.732457	0.747842	0.764141	0.775689	0.809261	0.842054	0.882824
26.6	0.706765	0.734939	0.740456	0.761937	0.771675	0.804352	0.83622	0.883373
26.7	0.707437	0.728772	0.741103	0.760919	0.77279	0.807687	0.835318	0.87955
26.8	0.70479	0.731756	0.742586	0.76151	0.769539	0.806272	0.839443	0.880128
26.9	0.707176	0.728844	0.743268	0.762871	0.771232	0.799959	0.834177	0.875707
27	0.705576	0.727421	0.741125	0.764839	0.767486	0.80057	0.830787	0.875028
27.1	0.704564	0.725098	0.742952	0.763495	0.771973	0.800292	0.83536	0.878561
27.2	0.705359	0.724988	0.740253	0.762512	0.76716	0.799746	0.83206	0.872565
27.3	0.700559	0.723223	0.737648	0.760874	0.768686	0.801145	0.833405	0.869899
27.4	0.698223	0.727092	0.737919	0.761006	0.764729	0.800334	0.831249	0.871557
27.5	0.698446	0.725385	0.73352	0.758967	0.763938	0.800263	0.831217	0.873687
27.6	0.700837	0.726471	0.736969	0.75895	0.767086	0.794158	0.826763	0.870729
27.7	0.700527	0.724991	0.734761	0.755857	0.76599	0.794552	0.822965	0.870891
27.8	0.696901	0.719697	0.733343	0.752897	0.759723	0.796688	0.827998	0.86718
27.9	0.697098	0.716843	0.730411	0.753084	0.759115	0.794536	0.822655	0.870661
28	0.697919	0.719147	0.736856	0.754907	0.759361	0.791811	0.826042	0.865642
28.1	0.695311	0.721109	0.73333	0.75695	0.75866	0.787235	0.82548	0.865797
28.2	0.693581	0.715899	0.731714	0.747994	0.754545	0.787855	0.819374	0.862694
28.3	0.694328	0.717079	0.726775	0.751701	0.758168	0.789503	0.822742	0.86209
28.4	0.691506	0.714092	0.729752	0.750466	0.757118	0.788308	0.822565	0.867251
28.5	0.688927	0.713805	0.726785	0.751833	0.7578	0.789154	0.818298	0.862571
28.6	0.695925	0.711901	0.723246	0.748711	0.755896	0.786375	0.817904	0.861447
28.7	0.690343	0.71234	0.727227	0.751905	0.74961	0.784484	0.820383	0.86433
28.8	0.68521	0.715731	0.723756	0.750091	0.749148	0.784865	0.817083	0.854999
28.9	0.690068	0.715576	0.720547	0.744274	0.746801	0.784497	0.813508	0.860503
29	0.687195	0.715388	0.720647	0.74493	0.751106	0.783744	0.815134	0.85378
29.1	0.683976	0.712783	0.71768	0.742392	0.749241	0.78547	0.814539	0.852374
29.2	0.69034	0.708636	0.720369	0.742328	0.748288	0.783498	0.81397	0.856217
29.3	0.689147	0.708452	0.724432	0.741433	0.746303	0.78109	0.813114	0.848483
29.4	0.682043	0.711309	0.72044	0.74269	0.746895	0.778695	0.812025	0.856786
29.5	0.683319	0.703691	0.722105	0.739774	0.749151	0.776759	0.810984	0.849708
29.6	0.677544	0.703397	0.71619	0.738608	0.750198	0.777629	0.805596	0.849549
29.7	0.682457	0.705065	0.713672	0.739532	0.743243	0.780182	0.804226	0.847936
29.8	0.677731	0.703856	0.717522	0.736988	0.745932	0.778721	0.80163	0.848635
29.9	0.67819	0.702195	0.720033	0.736445	0.741891	0.776879	0.802105	0.84409

## Sheet: DL n=2
x correct	18.1333	16.4	14.6667	12.9333	11.2	9.46663	7.73329	5.99995
time	100	169.381	286.901	485.956	823.119	1394.21	2361.53	4000
0	0.00652912	0.00730592	0.00946555	0.00989413	0.00778137	0.0107613	0.0107613	0.0128741
0.1	0.0088796	0.0110895	0.0141364	0.0158808	0.0129678	0.017488	0.0165505	0.0194032
0.2	0.0128707	0.0160784	0.0217939	0.0251287	0.0208061	0.0267694	0.024824	0.0274692
0.3	0.0181576	0.0233341	0.0329871	0.036841	0.0315842	0.0394828	0.0367807	0.0399783
0.4	0.0244022	0.0307103	0.0457574	0.0515198	0.044167	0.0532508	0.0516269	0.0554473
0.5	0.0312494	0.0395732	0.0589529	0.0670691	0.0580757	0.0725368	0.0662287	0.0736049
0.6	0.0392116	0.050214	0.0757646	0.082662	0.0771976	0.0906778	0.0884244	0.0920037
0.7	0.0484963	0.0614373	0.0914144	0.103498	0.0933731	0.113037	0.106525	0.112716
0.8	0.0593581	0.074519	0.1113	0.121934	0.112736	0.132873	0.129072	0.136957
0.9	0.0686026	0.0880828	0.129394	0.144953	0.132792	0.153233	0.15393	0.16138
1	0.0804689	0.100123	0.150304	0.16283	0.15467	0.177632	0.175761	0.184777
1.1	0.0914646	0.115971	0.169717	0.185983	0.175178	0.199326	0.198445	0.209689
1.2	0.10605	0.131413	0.188755	0.206484	0.195455	0.22353	0.220467	0.230665
1.3	0.117936	0.146714	0.209397	0.22425	0.217785	0.248502	0.244671	0.258754
1.4	0.131965	0.16151	0.227759	0.246643	0.234814	0.267235	0.265879	0.281921
1.5	0.142978	0.175285	0.244996	0.267657	0.255218	0.287398	0.288343	0.308767
1.6	0.158048	0.191822	0.266294	0.287459	0.275425	0.313388	0.311228	0.330812
1.7	0.171187	0.206424	0.290218	0.307645	0.295136	0.328971	0.333501	0.353249
1.8	0.182805	0.220396	0.30491	0.324246	0.31016	0.351474	0.351695	0.374879
1.9	0.198422	0.239558	0.322977	0.344229	0.329731	0.372431	0.367964	0.392752
2	0.210512	0.253229	0.33712	0.359045	0.349532	0.387766	0.390438	0.414813
2.1	0.226848	0.266023	0.357364	0.379188	0.364459	0.405525	0.407297	0.434598
2.2	0.238135	0.282637	0.373251	0.392671	0.378023	0.420686	0.425873	0.456496
2.3	0.251729	0.298217	0.391345	0.412306	0.392839	0.441861	0.440645	0.473719
2.4	0.264155	0.310548	0.406235	0.426569	0.411448	0.456238	0.461438	0.493739
2.5	0.276409	0.326155	0.420408	0.441663	0.426643	0.471366	0.473455	0.510497
2.6	0.290295	0.339126	0.433647	0.454865	0.435834	0.484916	0.490625	0.526568
2.7	0.307217	0.353898	0.450278	0.468322	0.451999	0.496237	0.503218	0.544428
2.8	0.316984	0.364248	0.460427	0.478554	0.465868	0.513487	0.515754	0.554751
2.9	0.329751	0.375605	0.475481	0.496799	0.475025	0.525788	0.532974	0.575657
3	0.341788	0.393438	0.488512	0.50158	0.488793	0.541478	0.546263	0.586877
3.1	0.35417	0.401343	0.498892	0.51654	0.500325	0.549963	0.55978	0.600066
3.2	0.364392	0.415128	0.512315	0.527077	0.512472	0.559301	0.566436	0.612696
3.3	0.377243	0.427081	0.519182	0.537099	0.523753	0.572179	0.578654	0.625701
3.4	0.390642	0.439919	0.536376	0.55092	0.532371	0.585039	0.593403	0.640319
3.5	0.403406	0.447536	0.542171	0.562716	0.539463	0.590892	0.601801	0.65623
3.6	0.410109	0.459489	0.551061	0.565244	0.551185	0.600274	0.612083	0.665572
3.7	0.420412	0.469203	0.561109	0.581731	0.562254	0.611805	0.621187	0.671304
3.8	0.434478	0.478732	0.572282	0.588511	0.566667	0.621401	0.629427	0.684811
3.9	0.443806	0.490032	0.576742	0.597026	0.576933	0.631831	0.644046	0.697012
4	0.453379	0.499377	0.591301	0.604613	0.587152	0.639251	0.649185	0.703712
4.1	0.46032	0.506003	0.599015	0.60984	0.593544	0.648459	0.657908	0.711112
4.2	0.464987	0.515586	0.606364	0.618505	0.604181	0.651372	0.667738	0.722934
4.3	0.479656	0.527533	0.610165	0.625316	0.60917	0.663777	0.672784	0.735772
4.4	0.489044	0.532957	0.623785	0.633619	0.616483	0.669925	0.680679	0.746074
4.5	0.496836	0.540216	0.628416	0.638645	0.620367	0.678161	0.691635	0.751639
4.6	0.505782	0.55011	0.63464	0.650083	0.627643	0.688618	0.699142	0.760452
4.7	0.513105	0.554995	0.645522	0.657435	0.638391	0.691708	0.704502	0.76839
4.8	0.524118	0.568271	0.652122	0.657613	0.64507	0.692977	0.713134	0.772458
4.9	0.533171	0.573702	0.650257	0.666161	0.650726	0.705667	0.71742	0.782225
5	0.541254	0.579351	0.666469	0.671883	0.654928	0.712039	0.725312	0.789354
5.1	0.540725	0.587969	0.6703	0.678044	0.661155	0.716422	0.731325	0.798337
5.2	0.554791	0.591438	0.675643	0.687369	0.667062	0.719703	0.739736	0.800242
5.3	0.556797	0.599156	0.681399	0.689482	0.673236	0.721793	0.745391	0.811375
5.4	0.566242	0.603967	0.68975	0.696928	0.680137	0.734138	0.747788	0.814479
5.5	0.570026	0.614266	0.696339	0.692837	0.681583	0.733367	0.754917	0.82583
5.6	0.577469	0.622302	0.698124	0.700046	0.689207	0.743821	0.756383	0.831197
5.7	0.582629	0.623464	0.704529	0.709819	0.695207	0.751739	0.765149	0.839585
5.8	0.593336	0.630358	0.707964	0.710254	0.696155	0.756122	0.768993	0.841436
5.9	0.600739	0.632735	0.714128	0.718414	0.699751	0.757569	0.778964	0.848591
6	0.606652	0.634938	0.717396	0.717128	0.706019	0.764543	0.780447	0.856677
6.1	0.610064	0.645583	0.721284	0.728231	0.712176	0.770731	0.789173	0.859584
6.2	0.61512	0.650488	0.721451	0.726607	0.71685	0.768233	0.793285	0.862771
6.3	0.626477	0.655725	0.726869	0.73248	0.723564	0.777056	0.792655	0.866063
6.4	0.629267	0.659675	0.738206	0.739237	0.719024	0.780786	0.797828	0.876215
6.5	0.632323	0.667651	0.738624	0.739301	0.723149	0.784854	0.799342	0.878632
6.6	0.638889	0.666697	0.744075	0.741142	0.729922	0.784737	0.805573	0.882744
6.7	0.635645	0.674033	0.744434	0.751056	0.732972	0.787218	0.808509	0.88637
6.8	0.649842	0.679849	0.751046	0.7527	0.732865	0.796449	0.813706	0.889785
6.9	0.653046	0.686267	0.752292	0.759086	0.744963	0.79592	0.816076	0.897536
7	0.652035	0.685601	0.757304	0.758985	0.744112	0.798809	0.817951	0.901029
7.1	0.661005	0.688879	0.760793	0.76161	0.744742	0.804421	0.823945	0.901417
7.2	0.662612	0.696677	0.762929	0.763679	0.747876	0.807351	0.819555	0.907782
7.3	0.668649	0.698197	0.765728	0.771575	0.755021	0.807103	0.830464	0.908412
7.4	0.675596	0.704388	0.770952	0.768802	0.753189	0.813358	0.83114	0.912567
7.5	0.673742	0.705587	0.776346	0.772328	0.755104	0.811473	0.83716	0.917438
7.6	0.681784	0.711011	0.776373	0.773001	0.75865	0.81537	0.836929	0.921808
7.7	0.687627	0.710392	0.779989	0.77655	0.760077	0.819431	0.844707	0.92889
7.8	0.690603	0.711895	0.785507	0.775465	0.763606	0.823767	0.847088	0.925762
7.9	0.689485	0.721511	0.787633	0.787238	0.763391	0.826292	0.848923	0.933554
8	0.691963	0.719961	0.785537	0.786655	0.768122	0.822927	0.846348	0.934829
8.1	0.702081	0.727254	0.789213	0.787529	0.774913	0.827497	0.853754	0.936393
8.2	0.703206	0.731549	0.791179	0.794979	0.772321	0.832235	0.855107	0.934019
8.3	0.703779	0.732617	0.79366	0.792719	0.776574	0.832396	0.85584	0.943317
8.4	0.711276	0.735728	0.801595	0.790281	0.779972	0.832379	0.855174	0.941071
8.5	0.715243	0.739846	0.799312	0.802566	0.78168	0.836772	0.863849	0.947198
8.6	0.717038	0.745341	0.807009	0.799697	0.78334	0.841383	0.860414	0.946408
8.7	0.716988	0.742492	0.80275	0.802027	0.785892	0.839725	0.86325	0.947452
8.8	0.723761	0.747959	0.804789	0.800671	0.789237	0.840164	0.86839	0.952545
8.9	0.721277	0.751672	0.806551	0.802231	0.789193	0.841751	0.867737	0.952301
9	0.727033	0.750072	0.808693	0.800293	0.794768	0.843927	0.874895	0.954417
9.1	0.731134	0.752041	0.808231	0.806517	0.798207	0.841781	0.870643	0.956583
9.2	0.734546	0.750176	0.815896	0.807836	0.798324	0.842916	0.870874	0.959724
9.3	0.738132	0.753049	0.815276	0.805874	0.794969	0.849057	0.873154	0.960497
9.4	0.741996	0.761212	0.817017	0.808107	0.799489	0.850838	0.877038	0.96332
9.5	0.745438	0.760217	0.815651	0.807411	0.796834	0.849465	0.881354	0.963276
9.6	0.745471	0.76304	0.81843	0.812989	0.802841	0.856095	0.877979	0.970917
9.7	0.743761	0.761295	0.822009	0.811134	0.806648	0.855562	0.880708	0.967552
9.8	0.750859	0.766847	0.823761	0.813867	0.810669	0.85431	0.879174	0.96415
9.9	0.751723	0.770781	0.819097	0.814888	0.809762	0.853051	0.886055	0.974707
10	0.757542	0.773788	0.827842	0.818591	0.804662	0.85435	0.883507	0.966561
10.1	0.761865	0.773403	0.829583	0.824172	0.805426	0.85437	0.883591	0.964944
10.2	0.754435	0.776503	0.829476	0.823138	0.811663	0.855706	0.891201	0.969772
10.3	0.761999	0.776018	0.830183	0.82283	0.81165	0.854849	0.885285	0.977888
10.4	0.76155	0.779349	0.82894	0.82514	0.811218	0.856021	0.88866	0.976616
10.5	0.763709	0.78019	0.8326	0.826962	0.813746	0.855502	0.888399	0.97907
10.6	0.765956	0.778197	0.833976	0.827953	0.815249	0.859095	0.890589	0.974248
10.7	0.764496	0.774752	0.836333	0.824343	0.814071	0.858626	0.895933	0.980968
10.8	0.767078	0.781254	0.835496	0.832041	0.812253	0.856627	0.898745	0.981611
10.9	0.766184	0.779165	0.840515	0.822374	0.814878	0.862731	0.897603	0.984893
11	0.769696	0.782895	0.833775	0.832982	0.814118	0.862885	0.897573	0.979274
11.1	0.775361	0.788406	0.837358	0.827718	0.817982	0.862755	0.898825	0.980446
11.2	0.774153	0.789461	0.837227	0.827758	0.819177	0.860692	0.895953	0.981364
11.3	0.776778	0.791373	0.84378	0.829255	0.818665	0.858479	0.897339	0.985458
11.4	0.777046	0.789438	0.838955	0.827132	0.82053	0.868925	0.897034	0.990966
11.5	0.78177	0.79232	0.842752	0.830173	0.818504	0.866253	0.901695	0.988067
11.6	0.780541	0.793121	0.841275	0.828642	0.823757	0.860936	0.899398	0.988395
11.7	0.782195	0.794738	0.83701	0.825311	0.819796	0.868212	0.898263	0.988988
11.8	0.784897	0.795431	0.840468	0.832436	0.81759	0.860953	0.899863	0.99025
11.9	0.787998	0.795575	0.841316	0.825462	0.824655	0.865982	0.899328	0.996926
12	0.783876	0.796302	0.842092	0.833246	0.823982	0.868835	0.905957	0.990913
12.1	0.788818	0.798508	0.846134	0.830635	0.823955	0.865155	0.904635	0.991063
12.2	0.791942	0.799887	0.842621	0.837987	0.825247	0.8624	0.901464	0.998453
12.3	0.786956	0.802148	0.844741	0.831375	0.8251	0.86914	0.906379	0.991917
12.4	0.786578	0.800929	0.841771	0.832054	0.823258	0.868658	0.903657	0.996645
12.5	0.790907	0.804197	0.842169	0.83417	0.825174	0.869702	0.906285	0.996113
12.6	0.794015	0.803574	0.843713	0.833588	0.825492	0.871028	0.903215	0.991475
12.7	0.797266	0.809343	0.847225	0.834438	0.818484	0.864576	0.906737	0.999541
12.8	0.792508	0.810736	0.845719	0.83336	0.826908	0.870405	0.901193	0.997703
12.9	0.799027	0.805864	0.844584	0.832426	0.828338	0.873385	0.903175	0.991941
13	0.802787	0.811975	0.847794	0.831137	0.82129	0.868714	0.906302	0.992795
13.1	0.79526	0.806949	0.845166	0.834646	0.821608	0.873094	0.901913	0.994385
13.2	0.801508	0.808677	0.851632	0.835041	0.823593	0.867807	0.90277	0.997532
13.3	0.798357	0.807535	0.844034	0.830628	0.825944	0.868812	0.906295	0.999384
13.4	0.805509	0.807779	0.842022	0.834214	0.825314	0.868909	0.908807	0.994439
13.5	0.803263	0.810585	0.847456	0.836792	0.82595	0.869913	0.907524	0.996337
13.6	0.800875	0.807953	0.85128	0.832362	0.823295	0.868092	0.906366	0.995627
13.7	0.804532	0.8123	0.853322	0.838326	0.825927	0.870506	0.909858	0.993454
13.8	0.8028	0.813599	0.848159	0.830464	0.826131	0.870412	0.908977	0.995493
13.9	0.804046	0.812819	0.846261	0.832309	0.826037	0.870506	0.909322	0.994676
14	0.80428	0.811734	0.849593	0.828673	0.823198	0.87213	0.903704	0.99617
14.1	0.805084	0.815855	0.849512	0.835228	0.826838	0.865252	0.905636	0.994469
14.2	0.801947	0.815139	0.84595	0.833859	0.82665	0.872528	0.903078	0.997492
14.3	0.811734	0.815688	0.845163	0.834817	0.825981	0.868895	0.90295	0.998724
14.4	0.809591	0.815648	0.847838	0.835105	0.821685	0.865822	0.90655	0.993072
14.5	0.809346	0.817941	0.84756	0.834134	0.828184	0.871648	0.909848	0.992882
14.6	0.813217	0.818444	0.854712	0.830846	0.829181	0.8714	0.90424	0.991137
14.7	0.811375	0.818139	0.849438	0.834636	0.829885	0.871504	0.906031	0.993431
14.8	0.806959	0.821778	0.847483	0.835878	0.828649	0.875823	0.908914	0.990518
14.9	0.815129	0.817958	0.849449	0.838891	0.823754	0.87005	0.905375	0.993046
15	0.811914	0.818541	0.852221	0.834254	0.827417	0.869916	0.904002	1
15.1	0.814252	0.814509	0.851578	0.831907	0.826489	0.871199	0.906185	0.993789
15.2	0.811941	0.811955	0.851695	0.829004	0.829202	0.872033	0.909004	0.995795
15.3	0.815122	0.818588	0.843077	0.838958	0.827869	0.866123	0.907601	0.990401
15.4	0.813666	0.82146	0.854856	0.833789	0.821136	0.871748	0.907685	0.992942
15.5	0.81692	0.815872	0.848005	0.831763	0.822843	0.872307	0.907079	0.990548
15.6	0.815467	0.818504	0.849646	0.833494	0.826496	0.869645	0.902535	0.989523
15.7	0.819073	0.818203	0.844332	0.830983	0.826553	0.86629	0.905981	0.991643
15.8	0.815189	0.821678	0.846944	0.83634	0.823191	0.868015	0.903858	0.988887
15.9	0.814908	0.816043	0.848889	0.829081	0.826101	0.867847	0.901045	0.988248
16	0.817891	0.817312	0.848082	0.831997	0.827199	0.86622	0.901521	0.9925
16.1	0.817098	0.814402	0.84817	0.832044	0.819542	0.868353	0.901584	0.992111
16.2	0.819043	0.814081	0.847938	0.834301	0.824745	0.871031	0.90572	0.989831
16.3	0.819759	0.817888	0.846472	0.828907	0.819431	0.868788	0.902817	0.986784
16.4	0.817479	0.812648	0.846171	0.826968	0.818062	0.864111	0.899562	0.988217
16.5	0.818424	0.819843	0.843361	0.829543	0.820235	0.864579	0.905097	0.987605
16.6	0.817104	0.813548	0.845397	0.828629	0.819853	0.861563	0.900068	0.986788
16.7	0.819793	0.816642	0.842056	0.828341	0.822401	0.860702	0.899174	0.986845
16.8	0.819304	0.813003	0.847409	0.820955	0.819401	0.864526	0.896666	0.989346
16.9	0.816696	0.813702	0.847949	0.824926	0.819451	0.860039	0.902234	0.985967
17	0.817978	0.814553	0.843077	0.828324	0.820667	0.869588	0.901156	0.984618
17.1	0.823205	0.81845	0.845598	0.826412	0.822917	0.86095	0.901089	0.981809
17.2	0.821835	0.815758	0.844533	0.824795	0.816636	0.866183	0.898986	0.989008
17.3	0.82288	0.815517	0.842916	0.833243	0.815983	0.867409	0.89312	0.984133
17.4	0.821866	0.817978	0.841912	0.82221	0.821189	0.868219	0.897824	0.983624
17.5	0.82139	0.815889	0.846485	0.821842	0.818728	0.85581	0.899676	0.982408
17.6	0.821651	0.818521	0.844932	0.821226	0.814871	0.857243	0.895651	0.979385
17.7	0.824146	0.818544	0.841965	0.819629	0.815574	0.857022	0.894091	0.981705
17.8	0.814884	0.819321	0.839662	0.818969	0.818601	0.863508	0.901317	0.981451
17.9	0.820168	0.820382	0.836484	0.827638	0.81609	0.858613	0.89755	0.981842
18	0.820499	0.820714	0.841108	0.821313	0.81763	0.854525	0.898648	0.983152
18.1	0.817955	0.818186	0.842568	0.823476	0.81771	0.851578	0.898032	0.981374
18.2	0.82745	0.818182	0.840405	0.822405	0.816364	0.856413	0.900714	0.977778
18.3	0.820041	0.816311	0.841804	0.821514	0.817777	0.855134	0.893234	0.984169
18.4	0.822602	0.815125	0.841245	0.818869	0.812792	0.857136	0.894302	0.985515
18.5	0.820938	0.812889	0.8379	0.814774	0.814851	0.857705	0.897483	0.974821
18.6	0.815835	0.821119	0.838905	0.812681	0.816411	0.856289	0.892407	0.975042
18.7	0.81992	0.814282	0.836816	0.81679	0.812229	0.853142	0.893843	0.977011
18.8	0.8251	0.815698	0.840579	0.814319	0.81023	0.855398	0.891844	0.97528
18.9	0.822344	0.813672	0.841011	0.821845	0.808412	0.853038	0.891332	0.975591
19	0.821568	0.811436	0.839531	0.817848	0.816391	0.852465	0.89309	0.974305
19.1	0.813877	0.815762	0.835975	0.815782	0.806805	0.852984	0.890857	0.971245
19.2	0.819609	0.814325	0.834582	0.817047	0.809186	0.849814	0.888409	0.972052
19.3	0.822873	0.811412	0.839986	0.816987	0.809788	0.851966	0.886333	0.974064
19.4	0.816632	0.813682	0.836454	0.812604	0.808968	0.852583	0.885168	0.970395
19.5	0.819944	0.807558	0.834492	0.817268	0.804913	0.852425	0.885	0.974302
19.6	0.819311	0.812075	0.834569	0.810947	0.805613	0.845839	0.891707	0.971841
19.7	0.816565	0.810257	0.837994	0.813692	0.809273	0.850734	0.887756	0.974091
19.8	0.818909	0.807147	0.831656	0.811231	0.812186	0.850607	0.884957	0.96946
19.9	0.82055	0.809484	0.831552	0.813254	0.810739	0.848317	0.884157	0.96722
20	0.817888	0.803222	0.830564	0.807083	0.803236	0.845032	0.887187	0.96405
20.1	0.818286	0.807445	0.830852	0.805824	0.806497	0.849047	0.883437	0.964063
20.2	0.820456	0.806922	0.833742	0.804923	0.805184	0.846777	0.885981	0.965901
20.3	0.816739	0.810451	0.837157	0.808402	0.805476	0.846994	0.878799	0.963142
20.4	0.817429	0.807455	0.830882	0.812671	0.802318	0.844496	0.887006	0.968577
20.5	0.817409	0.801053	0.833822	0.807157	0.804759	0.844011	0.883363	0.965965
20.6	0.820898	0.807033	0.825984	0.810964	0.799623	0.840003	0.877296	0.963464
20.7	0.819465	0.804525	0.828083	0.812577	0.79825	0.840974	0.876623	0.961083
20.8	0.819013	0.806688	0.826459	0.808198	0.801086	0.839146	0.877249	0.958602
20.9	0.813003	0.806768	0.82594	0.805037	0.802861	0.837659	0.876365	0.959787
21	0.819964	0.805338	0.823178	0.805034	0.801173	0.840458	0.873965	0.953693
21.1	0.817004	0.800483	0.827404	0.805379	0.798605	0.839739	0.876881	0.955264
21.2	0.81465	0.802429	0.824604	0.802385	0.800135	0.837793	0.874909	0.952773
21.3	0.812082	0.80042	0.822632	0.803095	0.795963	0.841068	0.870516	0.953138
21.4	0.817546	0.799754	0.827005	0.804769	0.7998	0.837006	0.875344	0.958006
21.5	0.810702	0.798682	0.822592	0.798893	0.791678	0.834003	0.87369	0.953097
21.6	0.810642	0.800899	0.824795	0.806253	0.792649	0.835938	0.876683	0.950369
21.7	0.814225	0.806778	0.81986	0.804702	0.795287	0.835366	0.874802	0.949147
21.8	0.812467	0.80423	0.819793	0.802482	0.794791	0.836297	0.871946	0.957189
21.9	0.8132	0.801619	0.824698	0.799502	0.792525	0.839809	0.87292	0.945135
22	0.817556	0.799717	0.82743	0.796663	0.800155	0.836243	0.87445	0.952843
22.1	0.81016	0.79813	0.819461	0.794818	0.793084	0.82892	0.86838	0.948484
22.2	0.812762	0.797296	0.81245	0.794815	0.793097	0.836481	0.868062	0.946525
22.3	0.808707	0.797808	0.821263	0.793576	0.791942	0.828348	0.867308	0.946853
22.4	0.808566	0.796335	0.819251	0.794607	0.789689	0.829279	0.86619	0.948842
22.5	0.808533	0.797239	0.814345	0.79586	0.788785	0.830933	0.869779	0.94239
22.6	0.811047	0.796814	0.817101	0.791356	0.792826	0.827655	0.869408	0.942262
22.7	0.808603	0.79675	0.815886	0.791252	0.789381	0.828137	0.865343	0.942286
22.8	0.809333	0.794527	0.816163	0.791426	0.785296	0.8295	0.867429	0.943967
22.9	0.81101	0.79298	0.814596	0.791704	0.786434	0.822706	0.863411	0.935867
23	0.808747	0.793897	0.811858	0.790395	0.78699	0.826282	0.862102	0.944064
23.1	0.809561	0.79077	0.813337	0.78764	0.786963	0.822994	0.866883	0.93576
23.2	0.810321	0.790673	0.813676	0.791028	0.787563	0.825565	0.860481	0.933102
23.3	0.806594	0.79001	0.814981	0.792009	0.785718	0.826737	0.865748	0.938516
23.4	0.80339	0.790402	0.816636	0.787723	0.780923	0.822669	0.861198	0.934484
23.5	0.805586	0.787733	0.81469	0.788212	0.785112	0.820004	0.855425	0.937173
23.6	0.806597	0.795411	0.810153	0.785225	0.783424	0.823399	0.857669	0.933008
23.7	0.80279	0.791122	0.811861	0.783571	0.781633	0.827494	0.857823	0.931769
23.8	0.807893	0.790462	0.811724	0.782701	0.780926	0.822599	0.849847	0.931953
23.9	0.805794	0.790603	0.808817	0.785246	0.779071	0.818377	0.853148	0.933801
24	0.798307	0.786083	0.807331	0.784027	0.77873	0.814375	0.857853	0.929429
24.1	0.805295	0.785426	0.808141	0.781502	0.778382	0.814841	0.851163	0.928769
24.2	0.801334	0.784331	0.801876	0.78018	0.779088	0.819083	0.85734	0.926385
24.3	0.802211	0.779349	0.808342	0.779939	0.782376	0.815048	0.855559	0.927463
24.4	0.806028	0.785935	0.804806	0.783766	0.780504	0.815296	0.852372	0.92891
24.5	0.801059	0.781653	0.803628	0.781753	0.775475	0.817844	0.851899	0.929365
24.6	0.803109	0.785634	0.804217	0.780695	0.776145	0.819244	0.848293	0.927607
24.7	0.800664	0.785108	0.804719	0.782085	0.772944	0.81024	0.851183	0.925879
24.8	0.800058	0.785373	0.803788	0.781506	0.775884	0.814151	0.849961	0.925648
24.9	0.799797	0.777002	0.797242	0.780394	0.776959	0.806099	0.845116	0.921587
25	0.798572	0.776115	0.803021	0.779661	0.770979	0.817439	0.849228	0.925113
25.1	0.798565	0.778361	0.798853	0.780417	0.775335	0.817054	0.840398	0.924282
25.2	0.797028	0.780468	0.8019	0.777431	0.770034	0.814027	0.840325	0.917901
25.3	0.791252	0.772288	0.801816	0.780735	0.7713	0.80801	0.840847	0.916822
25.4	0.800025	0.781526	0.795016	0.774916	0.768119	0.809919	0.845933	0.916317
25.5	0.795766	0.775445	0.79973	0.776426	0.771256	0.808817	0.844202	0.918423
25.6	0.799097	0.774792	0.795883	0.774119	0.769314	0.806072	0.84465	0.91786
25.7	0.793271	0.773677	0.798056	0.774655	0.766626	0.813967	0.839169	0.922072
25.8	0.790388	0.776848	0.795525	0.771377	0.767871	0.803597	0.842615	0.915473
25.9	0.795468	0.775586	0.797052	0.771605	0.76976	0.806417	0.83852	0.912557
26	0.796626	0.774213	0.796228	0.765544	0.767935	0.806905	0.842246	0.914552
26.1	0.792849	0.773838	0.79595	0.770188	0.764084	0.804599	0.840385	0.91263
26.2	0.79515	0.774963	0.793522	0.773416	0.758262	0.80637	0.840572	0.91339
26.3	0.791286	0.774364	0.794855	0.766311	0.764801	0.804046	0.8363	0.912038
26.4	0.791289	0.766639	0.790265	0.767647	0.766244	0.803721	0.835925	0.908833
26.5	0.794644	0.769294	0.788664	0.765939	0.759913	0.805991	0.835195	0.91256
26.6	0.789049	0.770433	0.789163	0.76904	0.760217	0.799107	0.836913	0.909942
26.7	0.787425	0.774749	0.787603	0.762775	0.757934	0.800969	0.83248	0.903925
26.8	0.789675	0.76902	0.788805	0.768082	0.758496	0.80044	0.833136	0.904712
26.9	0.788356	0.770279	0.786166	0.761895	0.760432	0.804532	0.830745	0.906212
27	0.78482	0.768521	0.793516	0.764459	0.75928	0.796918	0.825304	0.902291
27.1	0.79004	0.76755	0.792019	0.763137	0.758711	0.796509	0.832634	0.908335
27.2	0.787402	0.76377	0.780601	0.764141	0.755399	0.792736	0.827635	0.904256
27.3	0.786009	0.765216	0.786036	0.761031	0.758751	0.7959	0.827126	0.902425
27.4	0.786565	0.767958	0.783119	0.75939	0.753256	0.798555	0.825575	0.897935
27.5	0.782004	0.765963	0.786508	0.762363	0.754539	0.795464	0.826821	0.896143
27.6	0.782697	0.760914	0.781958	0.757495	0.752228	0.795411	0.826885	0.900677
27.7	0.786129	0.765367	0.78249	0.761603	0.753614	0.793516	0.83266	0.899254
27.8	0.782741	0.760663	0.783166	0.760602	0.749694	0.789136	0.827524	0.900349
27.9	0.782081	0.763137	0.776306	0.755804	0.747755	0.790693	0.822632	0.894687
28	0.780504	0.757247	0.782477	0.755821	0.750524	0.788811	0.821226	0.893177
28.1	0.782979	0.759561	0.781187	0.751133	0.746915	0.790717	0.820858	0.898025
28.2	0.777745	0.758148	0.775465	0.751498	0.753755	0.790583	0.820851	0.895571
28.3	0.782858	0.752489	0.782795	0.755563	0.751545	0.787278	0.821899	0.89079
28.4	0.774414	0.759866	0.770915	0.753189	0.747631	0.784991	0.824116	0.890773
28.5	0.779225	0.755479	0.775264	0.752319	0.74369	0.783531	0.818179	0.889018
28.6	0.774739	0.754368	0.777247	0.751398	0.742833	0.787157	0.816361	0.888201
28.7	0.781475	0.759802	0.78033	0.745719	0.74205	0.782473	0.819086	0.888459
28.8	0.775723	0.757837	0.770513	0.75272	0.748107	0.784064	0.814707	0.888208
28.9	0.776938	0.751505	0.774571	0.749958	0.747916	0.779965	0.818775	0.888583
29	0.774849	0.752771	0.776048	0.744608	0.745853	0.780829	0.818531	0.88948
29.1	0.770741	0.754046	0.76989	0.742361	0.740737	0.778941	0.810049	0.883035
29.2	0.769509	0.752399	0.770326	0.746345	0.74223	0.779379	0.809932	0.880664
29.3	0.773326	0.749463	0.770051	0.74281	0.747464	0.78408	0.812648	0.883273
29.4	0.771822	0.750139	0.766458	0.742415	0.737399	0.779215	0.813421	0.882975
29.5	0.76837	0.750789	0.771491	0.747651	0.735001	0.775385	0.809668	0.883996
29.6	0.771645	0.750735	0.765236	0.743044	0.738681	0.775291	0.810522	0.880966
29.7	0.768913	0.749195	0.768745	0.740918	0.740714	0.775412	0.809983	0.883725
29.8	0.770955	0.748913	0.769164	0.737888	0.737539	0.77803	0.808114	0.883199
29.9	0.77363	0.74373	0.767148	0.745629	0.736421	0.779463	0.807237	0.879024

## Sheet: DL n=3
x correct	18.1333	16.4	14.6667	12.9333	11.2	9.46663	7.73329	5.99995
time	100	158.382	250.848	397.299	629.249	996.618	1578.46	2500
0	0.00841176	0.0120414	0.0136541	0.0138841	0.0147958	0.01809	0.0156667	0.0211154
0.1	0.0141594	0.0195608	0.0224658	0.0235323	0.0239	0.0290133	0.0252697	0.0309442
0.2	0.0204918	0.0291466	0.0347265	0.037253	0.0385303	0.0442908	0.0387109	0.0450971
0.3	0.0276414	0.0399795	0.0494191	0.0511909	0.0556527	0.0621335	0.0546786	0.0632452
0.4	0.0369004	0.0533885	0.0654019	0.0699927	0.0755618	0.0834489	0.0753188	0.0834124
0.5	0.0459314	0.0679499	0.0834167	0.0885471	0.0958494	0.106906	0.097161	0.105599
0.6	0.057747	0.0820878	0.102328	0.109359	0.117692	0.130881	0.120455	0.130376
0.7	0.0685649	0.0973546	0.123235	0.129419	0.140972	0.155074	0.142809	0.155039
0.8	0.080359	0.113894	0.142327	0.151253	0.164988	0.181631	0.17008	0.179281
0.9	0.0914005	0.129032	0.161404	0.17148	0.18966	0.206923	0.19495	0.20628
1	0.104128	0.146311	0.183889	0.19338	0.213724	0.230244	0.218385	0.233493
1.1	0.116915	0.161815	0.204061	0.213214	0.235581	0.254856	0.243745	0.261085
1.2	0.130952	0.177853	0.222456	0.235258	0.258473	0.280773	0.267071	0.285959
1.3	0.1438	0.197117	0.243967	0.255838	0.280377	0.304079	0.293257	0.308197
1.4	0.155549	0.212287	0.261027	0.276851	0.302193	0.325911	0.315185	0.335572
1.5	0.169766	0.226552	0.279956	0.292132	0.324059	0.350439	0.338079	0.359102
1.6	0.180285	0.243509	0.298357	0.312936	0.343934	0.367309	0.359381	0.380035
1.7	0.19421	0.259681	0.317701	0.332974	0.362779	0.391596	0.37879	0.40562
1.8	0.206785	0.27235	0.332583	0.349589	0.384146	0.407295	0.399066	0.425738
1.9	0.219637	0.286587	0.350221	0.362983	0.398703	0.427381	0.419685	0.448614
2	0.235192	0.298949	0.364374	0.381267	0.41512	0.449053	0.43681	0.465859
2.1	0.246139	0.314418	0.381432	0.39365	0.43303	0.463092	0.457843	0.485633
2.2	0.257838	0.327717	0.394329	0.409319	0.445219	0.480051	0.473366	0.500018
2.3	0.2682	0.339006	0.408715	0.425899	0.463228	0.494094	0.486095	0.519545
2.4	0.281108	0.349606	0.421926	0.437915	0.475484	0.511911	0.505974	0.536153
2.5	0.29259	0.362775	0.433096	0.451694	0.492249	0.523217	0.51951	0.554002
2.6	0.302673	0.374489	0.446982	0.461922	0.503048	0.537895	0.53825	0.569392
2.7	0.31402	0.388001	0.458774	0.478462	0.518663	0.552394	0.54933	0.580893
2.8	0.325005	0.400434	0.471532	0.485883	0.528666	0.565323	0.558976	0.591976
2.9	0.334561	0.407134	0.480604	0.496163	0.539974	0.57506	0.574787	0.606987
3	0.346667	0.418917	0.489559	0.510019	0.55028	0.591199	0.589047	0.623505
3.1	0.356842	0.433595	0.50248	0.520826	0.56115	0.598811	0.600207	0.632916
3.2	0.36658	0.442768	0.512735	0.527483	0.572694	0.607221	0.608479	0.642842
3.3	0.376985	0.450487	0.522134	0.537891	0.580633	0.618744	0.617011	0.654275
3.4	0.383615	0.458323	0.526228	0.549014	0.592537	0.631312	0.63137	0.664478
3.5	0.393768	0.46838	0.541675	0.556806	0.600557	0.642225	0.639034	0.680433
3.6	0.403111	0.476116	0.549751	0.563403	0.608103	0.64969	0.647577	0.684905
3.7	0.410652	0.48375	0.553693	0.572118	0.618329	0.657461	0.662153	0.697854
3.8	0.421311	0.49109	0.563483	0.580532	0.625203	0.66394	0.664635	0.706758
3.9	0.42729	0.50139	0.567757	0.589137	0.632426	0.673105	0.677502	0.718941
4	0.435251	0.508617	0.580371	0.597715	0.641034	0.680989	0.685096	0.729329
4.1	0.444725	0.514324	0.584818	0.601951	0.648439	0.690659	0.691693	0.731522
4.2	0.452184	0.52329	0.592004	0.613964	0.654066	0.696583	0.696521	0.743291
4.3	0.45842	0.532035	0.59624	0.616798	0.661842	0.701275	0.708373	0.748997
4.4	0.463608	0.53493	0.605314	0.621094	0.666439	0.710489	0.709753	0.757624
4.5	0.472097	0.542696	0.613715	0.625651	0.6729	0.718275	0.722831	0.76646
4.6	0.482225	0.54535	0.614818	0.635907	0.68458	0.724502	0.726037	0.772093
4.7	0.485833	0.557825	0.625623	0.643192	0.685268	0.731118	0.735754	0.779948
4.8	0.492679	0.561948	0.62801	0.647555	0.690698	0.735475	0.740553	0.785429
4.9	0.50001	0.564906	0.633501	0.649119	0.69914	0.740521	0.751724	0.787424
5	0.5064	0.570318	0.640853	0.657092	0.70567	0.746568	0.754526	0.799975
5.1	0.513642	0.579528	0.644661	0.664342	0.709181	0.753661	0.759734	0.807041
5.2	0.516397	0.583777	0.649985	0.668021	0.711458	0.75928	0.764668	0.809095
5.3	0.523624	0.584428	0.655918	0.673821	0.720784	0.76647	0.77079	0.816689
5.4	0.527939	0.593795	0.659906	0.677422	0.723569	0.7675	0.774329	0.823052
5.5	0.535209	0.600542	0.665325	0.682004	0.726777	0.772792	0.784148	0.828823
5.6	0.539523	0.604626	0.668109	0.689251	0.734032	0.780311	0.787818	0.832855
5.7	0.544124	0.608853	0.674076	0.689083	0.738126	0.78241	0.791585	0.83871
5.8	0.552097	0.613637	0.677865	0.696357	0.74213	0.787263	0.794056	0.842649
5.9	0.555542	0.61682	0.681011	0.700064	0.745637	0.790717	0.798455	0.847449
6	0.560933	0.620978	0.686496	0.704894	0.751167	0.796896	0.802586	0.856439
6.1	0.565065	0.626135	0.690524	0.708295	0.757613	0.799535	0.811256	0.86106
6.2	0.570157	0.630401	0.695022	0.712303	0.756366	0.803216	0.818066	0.864016
6.3	0.573288	0.635718	0.700458	0.715587	0.761755	0.806286	0.820123	0.86762
6.4	0.576432	0.641894	0.704109	0.71869	0.764703	0.8104	0.826071	0.87526
6.5	0.584979	0.643681	0.703733	0.721345	0.768513	0.812997	0.824185	0.881317
6.6	0.587069	0.647871	0.708371	0.726891	0.770876	0.814924	0.825637	0.87658
6.7	0.591894	0.648753	0.712424	0.728841	0.775379	0.820104	0.8317	0.88702
6.8	0.595451	0.650434	0.716572	0.727843	0.776871	0.826817	0.840372	0.892262
6.9	0.597175	0.656442	0.71683	0.739194	0.781382	0.827217	0.840914	0.894064
7	0.599196	0.664015	0.723194	0.74182	0.781408	0.832395	0.840811	0.895378
7.1	0.605284	0.664172	0.729372	0.744615	0.790908	0.835953	0.846176	0.897917
7.2	0.609674	0.667254	0.72946	0.745961	0.791942	0.839583	0.846466	0.899553
7.3	0.609829	0.669597	0.734105	0.747406	0.793542	0.838282	0.854054	0.90137
7.4	0.61539	0.671993	0.738425	0.752315	0.799795	0.842445	0.856628	0.91041
7.5	0.616594	0.674777	0.739541	0.752967	0.798973	0.843666	0.860043	0.914919
7.6	0.624988	0.678626	0.737982	0.75616	0.803022	0.846819	0.862892	0.917243
7.7	0.624567	0.682957	0.743172	0.758461	0.801266	0.852629	0.863296	0.917654
7.8	0.627238	0.689186	0.744467	0.761572	0.809538	0.852156	0.86704	0.926098
7.9	0.632056	0.686193	0.746022	0.765144	0.810138	0.854964	0.871942	0.922763
8	0.635185	0.687518	0.746998	0.768339	0.814963	0.857682	0.87229	0.925079
8.1	0.636688	0.694674	0.751894	0.766402	0.812974	0.859249	0.874961	0.929418
8.2	0.641681	0.694287	0.755547	0.768053	0.821491	0.8554	0.877705	0.93085
8.3	0.644012	0.698695	0.753663	0.775282	0.820986	0.862257	0.882586	0.936179
8.4	0.64636	0.704324	0.762129	0.778428	0.818631	0.863193	0.880547	0.941079
8.5	0.647394	0.70415	0.761647	0.777363	0.820951	0.863775	0.88311	0.942601
8.6	0.649635	0.705509	0.766361	0.78149	0.822708	0.867764	0.885407	0.9435
8.7	0.658143	0.709532	0.761297	0.783526	0.82766	0.867586	0.892023	0.949779
8.8	0.660476	0.707147	0.76604	0.786164	0.827004	0.872224	0.89212	0.950387
8.9	0.658337	0.715176	0.766058	0.789272	0.83233	0.875193	0.892464	0.947418
9	0.660018	0.716428	0.771969	0.786162	0.831434	0.87555	0.891036	0.951194
9.1	0.662495	0.719161	0.773248	0.790325	0.829025	0.877363	0.897971	0.954557
9.2	0.664433	0.717862	0.772616	0.795759	0.831031	0.876847	0.900386	0.956524
9.3	0.668544	0.716486	0.774727	0.79526	0.836205	0.877974	0.90076	0.955146
9.4	0.668733	0.720788	0.774003	0.79683	0.839873	0.883508	0.902114	0.955391
9.5	0.668021	0.727403	0.778193	0.795653	0.837293	0.885424	0.901474	0.957778
9.6	0.672053	0.723683	0.776372	0.799442	0.837517	0.887424	0.908043	0.961195
9.7	0.675048	0.727828	0.779069	0.804884	0.840946	0.884938	0.9024	0.965467
9.8	0.673868	0.728293	0.783631	0.802169	0.843135	0.887415	0.908202	0.966104
9.9	0.678358	0.729856	0.781681	0.800433	0.8481	0.889067	0.906838	0.970299
10	0.677923	0.735715	0.783894	0.804986	0.844881	0.891017	0.91227	0.968729
10.1	0.68125	0.735722	0.78693	0.802893	0.847425	0.891232	0.915252	0.971247
10.2	0.679895	0.734922	0.787743	0.806583	0.849304	0.893872	0.917568	0.970821
10.3	0.685092	0.736145	0.789368	0.809701	0.848218	0.892819	0.915624	0.971686
10.4	0.68544	0.735401	0.790603	0.804998	0.852302	0.893457	0.918099	0.977242
10.5	0.68947	0.738825	0.789601	0.810965	0.85308	0.898055	0.91819	0.975429
10.6	0.688595	0.738313	0.793305	0.808325	0.850231	0.897057	0.920138	0.978661
10.7	0.691126	0.742861	0.794	0.811479	0.854198	0.899121	0.924408	0.975165
10.8	0.694441	0.74457	0.792914	0.814782	0.856028	0.89595	0.921516	0.981523
10.9	0.694547	0.746886	0.79643	0.814305	0.85574	0.896717	0.926042	0.981919
11	0.693181	0.745028	0.798148	0.815416	0.858015	0.899317	0.92258	0.981607
11.1	0.696957	0.744998	0.798429	0.817945	0.85634	0.903533	0.922505	0.982071
11.2	0.696841	0.748365	0.798042	0.817885	0.858118	0.901181	0.925315	0.984993
11.3	0.694813	0.750313	0.803412	0.817565	0.856673	0.902495	0.92478	0.983228
11.4	0.699821	0.748699	0.80436	0.818298	0.860322	0.902615	0.926098	0.982721
11.5	0.701638	0.750752	0.799657	0.817255	0.861483	0.903329	0.930194	0.98223
11.6	0.701346	0.751801	0.804766	0.816713	0.860698	0.90325	0.926279	0.986406
11.7	0.700759	0.753762	0.802149	0.82391	0.863367	0.904766	0.929364	0.98594
11.8	0.705799	0.756169	0.803048	0.822043	0.863724	0.906176	0.932831	0.986535
11.9	0.705018	0.753203	0.805545	0.824243	0.864367	0.905738	0.930166	0.990305
12	0.703776	0.755814	0.805106	0.824854	0.8647	0.908163	0.929349	0.987759
12.1	0.702634	0.753152	0.807325	0.828499	0.868908	0.90497	0.933916	0.989272
12.2	0.707242	0.757018	0.807762	0.825974	0.863887	0.907376	0.9352	0.989726
12.3	0.706175	0.75856	0.806269	0.822299	0.861002	0.906894	0.935052	0.989666
12.4	0.71248	0.759716	0.807811	0.824239	0.867551	0.906982	0.936043	0.992846
12.5	0.7069	0.757656	0.810995	0.826725	0.866493	0.913693	0.936495	0.989507
12.6	0.710813	0.762366	0.810082	0.825486	0.868446	0.912442	0.933149	0.992792
12.7	0.711222	0.760822	0.808415	0.828187	0.865078	0.912524	0.937346	0.990799
12.8	0.712312	0.760284	0.807665	0.831552	0.869078	0.906628	0.934592	0.991246
12.9	0.7148	0.760884	0.809664	0.829027	0.867747	0.913324	0.934811	0.996076
13	0.71523	0.763385	0.809675	0.83006	0.866556	0.910128	0.937421	0.993388
13.1	0.71761	0.757923	0.806912	0.830421	0.872396	0.909309	0.935441	0.993003
13.2	0.715348	0.762297	0.81049	0.830335	0.872583	0.913091	0.937441	0.995555
13.3	0.716787	0.760772	0.806499	0.829974	0.870744	0.910984	0.941752	0.994063
13.4	0.716484	0.762389	0.812101	0.829253	0.870781	0.913657	0.937737	1
13.5	0.717935	0.763159	0.809148	0.831133	0.868869	0.913192	0.940589	0.995076
13.6	0.718819	0.763664	0.815732	0.8321	0.867964	0.91282	0.939778	0.992091
13.7	0.723022	0.76377	0.809183	0.831124	0.869517	0.914803	0.935727	0.993792
13.8	0.719361	0.764221	0.811589	0.832459	0.871626	0.912242	0.941292	0.994485
13.9	0.719864	0.768808	0.813189	0.833709	0.869573	0.912246	0.938649	0.994044
14	0.720885	0.76669	0.812421	0.831074	0.873626	0.91531	0.939597	0.995203
14.1	0.720834	0.766731	0.811505	0.829961	0.870753	0.9127	0.940088	0.99119
14.2	0.724214	0.76776	0.810363	0.83585	0.872561	0.914098	0.943034	0.994179
14.3	0.723508	0.765509	0.813991	0.834268	0.870751	0.910894	0.940881	0.996033
14.4	0.720877	0.769081	0.812585	0.830195	0.873219	0.91024	0.942371	0.99582
14.5	0.721537	0.76549	0.815369	0.833038	0.868921	0.916663	0.940513	0.994394
14.6	0.724177	0.765002	0.813333	0.830836	0.875677	0.913874	0.945618	0.995622
14.7	0.72144	0.767857	0.811286	0.833227	0.874499	0.913074	0.940918	0.99728
14.8	0.725007	0.767285	0.814978	0.8323	0.87065	0.916405	0.946988	0.993121
14.9	0.725332	0.769483	0.812557	0.835095	0.873619	0.913771	0.943173	0.992797
15	0.725998	0.767049	0.818201	0.836706	0.87206	0.912455	0.938372	0.992001
15.1	0.72259	0.769096	0.814541	0.836635	0.872443	0.915078	0.942567	0.993994
15.2	0.72808	0.769221	0.813098	0.834218	0.869426	0.912468	0.942135	0.99373
15.3	0.724913	0.768818	0.814902	0.836891	0.87355	0.915988	0.941752	0.992844
15.4	0.729286	0.77085	0.810746	0.836115	0.8738	0.912018	0.939084	0.98969
15.5	0.728308	0.769509	0.814672	0.835758	0.872112	0.911358	0.939724	0.993182
15.6	0.728299	0.768008	0.814907	0.837985	0.868355	0.916203	0.942081	0.992498
15.7	0.72657	0.769823	0.811567	0.835908	0.874019	0.914614	0.942868	0.991597
15.8	0.728417	0.769949	0.812984	0.835612	0.876172	0.915338	0.942887	0.99218
15.9	0.726506	0.766118	0.810796	0.835424	0.87374	0.913336	0.942853	0.992459
16	0.729213	0.771366	0.812266	0.830543	0.871443	0.913498	0.940445	0.993543
16.1	0.72656	0.768563	0.816335	0.835594	0.872043	0.916284	0.940832	0.988012
16.2	0.725504	0.768173	0.813511	0.835846	0.873348	0.914867	0.937664	0.992459
16.3	0.725534	0.770412	0.808463	0.836383	0.872187	0.909255	0.94373	0.992921
16.4	0.723865	0.767507	0.810783	0.838308	0.86939	0.910294	0.942573	0.991573
16.5	0.726865	0.768528	0.809222	0.830307	0.872275	0.911502	0.941126	0.98743
16.6	0.725186	0.765535	0.814556	0.835068	0.873406	0.910158	0.938701	0.991137
16.7	0.725493	0.769726	0.807099	0.835833	0.871725	0.911317	0.940045	0.985316
16.8	0.728987	0.770216	0.809776	0.834367	0.868912	0.906131	0.938589	0.987245
16.9	0.724773	0.769165	0.813986	0.832866	0.87371	0.909152	0.937903	0.987806
17	0.726981	0.768928	0.813434	0.834018	0.86945	0.910492	0.937619	0.987004
17.1	0.727065	0.767126	0.811275	0.832691	0.870583	0.912511	0.936471	0.984424
17.2	0.726207	0.77127	0.813352	0.835138	0.869263	0.909711	0.937071	0.987088
17.3	0.72742	0.769934	0.810482	0.83602	0.867545	0.906851	0.935336	0.983914
17.4	0.725564	0.766008	0.810568	0.834053	0.867551	0.906056	0.934828	0.986602
17.5	0.725803	0.769777	0.809224	0.833844	0.869919	0.913736	0.937458	0.987406
17.6	0.726848	0.765907	0.812483	0.831982	0.870766	0.910128	0.936488	0.982209
17.7	0.727661	0.767782	0.807583	0.82941	0.864829	0.909844	0.936123	0.985355
17.8	0.7268	0.766442	0.81146	0.832124	0.867459	0.907914	0.93577	0.984557
17.9	0.72748	0.769433	0.806065	0.831388	0.867285	0.905656	0.934329	0.980106
18	0.726607	0.766343	0.807762	0.834104	0.863384	0.908262	0.935007	0.980766
18.1	0.726889	0.767758	0.805087	0.832171	0.867334	0.905821	0.936037	0.984667
18.2	0.725115	0.766148	0.806833	0.831664	0.86404	0.906239	0.932007	0.979596
18.3	0.725786	0.766195	0.809082	0.830036	0.865203	0.906168	0.934762	0.983041
18.4	0.72699	0.766511	0.805676	0.829156	0.864545	0.905482	0.929848	0.981108
18.5	0.725962	0.767038	0.805097	0.827542	0.868495	0.903626	0.930495	0.981347
18.6	0.723958	0.767623	0.802601	0.828688	0.862139	0.905193	0.933056	0.980418
18.7	0.727112	0.766574	0.80565	0.829137	0.86436	0.901243	0.930773	0.983138
18.8	0.725209	0.762925	0.806237	0.828879	0.861156	0.903712	0.931252	0.97954
18.9	0.727534	0.763372	0.800244	0.827	0.864375	0.903822	0.932153	0.977104
19	0.723358	0.766045	0.803549	0.829393	0.860688	0.903785	0.931304	0.978332
19.1	0.727512	0.761327	0.803467	0.827647	0.864685	0.900938	0.930356	0.976595
19.2	0.725906	0.763015	0.799917	0.827475	0.860913	0.899201	0.926423	0.975767
19.3	0.724913	0.767193	0.80261	0.824946	0.858856	0.900874	0.925038	0.973356
19.4	0.72064	0.761387	0.808239	0.825441	0.858436	0.901302	0.927674	0.974464
19.5	0.726061	0.762361	0.800939	0.822635	0.861664	0.898764	0.925864	0.972748
19.6	0.722068	0.761486	0.801281	0.824146	0.8554	0.898304	0.925898	0.97184
19.7	0.723902	0.763337	0.799788	0.821579	0.857746	0.900201	0.926259	0.967957
19.8	0.723904	0.761017	0.800492	0.824579	0.859991	0.89859	0.928362	0.971883
19.9	0.723048	0.759368	0.799298	0.823258	0.860462	0.893875	0.923838	0.969155
20	0.723908	0.757325	0.802758	0.822136	0.85351	0.892913	0.927006	0.968884
20.1	0.721954	0.75954	0.800885	0.82042	0.856325	0.894644	0.921858	0.968766
20.2	0.723594	0.758476	0.800283	0.820289	0.853385	0.894027	0.92358	0.967306
20.3	0.721827	0.760518	0.800246	0.818846	0.853125	0.895154	0.925042	0.96643
20.4	0.72399	0.757988	0.800689	0.81936	0.854424	0.896601	0.91986	0.966086
20.5	0.716813	0.754352	0.796589	0.821323	0.8538	0.892832	0.925911	0.965276
20.6	0.721029	0.756263	0.795039	0.820725	0.855458	0.892599	0.921275	0.96437
20.7	0.723253	0.755637	0.795963	0.817334	0.852248	0.893219	0.920837	0.960605
20.8	0.718445	0.754732	0.795419	0.816137	0.850268	0.896261	0.921335	0.960259
20.9	0.719315	0.754121	0.794148	0.815444	0.855101	0.889292	0.915964	0.959029
21	0.719859	0.759095	0.794069	0.816483	0.851758	0.887938	0.916244	0.959449
21.1	0.717587	0.753102	0.792235	0.813735	0.851478	0.890948	0.919994	0.960197
21.2	0.719595	0.754807	0.791409	0.817042	0.846834	0.88774	0.917286	0.961562
21.3	0.716477	0.752046	0.791777	0.816055	0.847947	0.884489	0.916276	0.959057
21.4	0.715103	0.750079	0.793742	0.81432	0.848599	0.886491	0.920144	0.957924
21.5	0.719429	0.750832	0.793484	0.813223	0.845986	0.885618	0.914818	0.957141
21.6	0.714282	0.74995	0.788153	0.814045	0.842606	0.885929	0.916214	0.953456
21.7	0.716939	0.749008	0.787446	0.814105	0.84546	0.883046	0.91098	0.95266
21.8	0.715768	0.753747	0.786579	0.814111	0.84238	0.886065	0.910965	0.952323
21.9	0.713807	0.75189	0.790108	0.806798	0.841882	0.885377	0.912005	0.954604
22	0.712863	0.750275	0.783917	0.81246	0.846285	0.88371	0.910341	0.949123
22.1	0.710618	0.747705	0.786121	0.810458	0.842757	0.883889	0.910993	0.947267
22.2	0.713622	0.748301	0.783518	0.808095	0.846408	0.881356	0.907023	0.951011
22.3	0.711046	0.747243	0.78756	0.807581	0.844393	0.877786	0.908679	0.951884
22.4	0.714265	0.745477	0.78238	0.807213	0.842555	0.877079	0.907942	0.947996
22.5	0.711383	0.747262	0.785302	0.804448	0.842142	0.878771	0.907838	0.948519
22.6	0.708551	0.748178	0.784102	0.806682	0.837972	0.872871	0.906099	0.945659
22.7	0.711375	0.744598	0.779509	0.806497	0.837641	0.874669	0.905864	0.946887
22.8	0.710781	0.742639	0.782735	0.806439	0.842462	0.876589	0.906905	0.943846
22.9	0.710431	0.743323	0.778297	0.806581	0.835046	0.872959	0.903112	0.943511
23	0.708732	0.742405	0.781258	0.806736	0.837523	0.87621	0.903779	0.946166
23.1	0.707511	0.737618	0.778998	0.803964	0.837736	0.874075	0.899842	0.941526
23.2	0.709242	0.743347	0.779651	0.802788	0.836758	0.875251	0.900538	0.941601
23.3	0.710115	0.738666	0.780806	0.802023	0.833233	0.87148	0.901145	0.9376
23.4	0.705844	0.738678	0.774805	0.799793	0.832782	0.866543	0.901652	0.935331
23.5	0.712411	0.741652	0.776609	0.7989	0.833771	0.872422	0.8999	0.937254
23.6	0.706754	0.740809	0.777204	0.797361	0.834633	0.867145	0.900906	0.939165
23.7	0.70475	0.737648	0.773138	0.799963	0.833545	0.873815	0.898883	0.936224
23.8	0.703855	0.739824	0.77113	0.798537	0.828028	0.869041	0.895515	0.935353
23.9	0.707244	0.739736	0.772579	0.794667	0.829328	0.868734	0.894627	0.934946
24	0.702077	0.737246	0.773065	0.798518	0.828825	0.865281	0.895481	0.934519
24.1	0.705709	0.737021	0.77419	0.794058	0.82904	0.866235	0.895218	0.932353
24.2	0.703197	0.735354	0.773463	0.794574	0.825484	0.867897	0.892303	0.930328
24.3	0.701769	0.734098	0.771592	0.79228	0.827877	0.866616	0.893571	0.932801
24.4	0.70381	0.734253	0.770263	0.790757	0.826381	0.860821	0.895565	0.932302
24.5	0.701309	0.733619	0.77405	0.793492	0.825546	0.864855	0.891238	0.927846
24.6	0.696738	0.734958	0.764696	0.792546	0.819919	0.862954	0.893107	0.92678
24.7	0.699598	0.732903	0.766898	0.793084	0.82133	0.859026	0.895031	0.929607
24.8	0.703064	0.731439	0.765952	0.79297	0.823076	0.857931	0.890623	0.925885
24.9	0.697514	0.726643	0.766363	0.787513	0.820833	0.860776	0.885078	0.921529
25	0.698174	0.731404	0.764191	0.790652	0.822136	0.859464	0.881317	0.925862
25.1	0.700851	0.728749	0.762862	0.789353	0.821932	0.85895	0.884646	0.922125
25.2	0.697484	0.730895	0.763714	0.789089	0.818541	0.856338	0.885899	0.920705
25.3	0.694177	0.727663	0.762138	0.786091	0.817147	0.860066	0.881685	0.918738
25.4	0.69843	0.723822	0.762488	0.786534	0.816474	0.851044	0.882627	0.922099
25.5	0.693854	0.726269	0.763086	0.787579	0.818304	0.855267	0.884951	0.921411
25.6	0.698968	0.723551	0.759665	0.788119	0.815816	0.852379	0.881956	0.921899
25.7	0.693964	0.724728	0.760822	0.780653	0.819248	0.851852	0.878887	0.918962
25.8	0.693538	0.723046	0.758603	0.779484	0.814184	0.848053	0.879793	0.917323
25.9	0.690455	0.725207	0.758216	0.787233	0.814436	0.849672	0.87678	0.914855
26	0.693048	0.721956	0.759224	0.782814	0.810581	0.850693	0.875696	0.91076
26.1	0.691911	0.720212	0.75467	0.779963	0.811284	0.846808	0.879717	0.912614
26.2	0.692437	0.721068	0.75582	0.777585	0.810047	0.84827	0.877051	0.912274
26.3	0.689287	0.719221	0.752034	0.778393	0.813836	0.847771	0.875858	0.91293
26.4	0.688522	0.722502	0.754601	0.774295	0.814483	0.846773	0.873307	0.904789
26.5	0.688548	0.718277	0.75459	0.777938	0.807531	0.842593	0.875909	0.907664
26.6	0.690457	0.714409	0.752653	0.773753	0.808901	0.845911	0.871491	0.911347
26.7	0.687468	0.713828	0.752059	0.778086	0.809432	0.84507	0.876849	0.907393
26.8	0.685604	0.717101	0.750167	0.775544	0.805912	0.839209	0.869942	0.903056
26.9	0.684232	0.715215	0.752956	0.774637	0.808628	0.842995	0.866143	0.903527
27	0.685092	0.713708	0.747946	0.773994	0.806732	0.842785	0.865584	0.905628
27.1	0.686842	0.718251	0.751694	0.771216	0.806009	0.837216	0.868011	0.898977
27.2	0.681742	0.714938	0.749808	0.768692	0.803435	0.840445	0.867482	0.901381
27.3	0.682647	0.715907	0.744443	0.770315	0.804297	0.837342	0.866076	0.89802
27.4	0.681069	0.712594	0.74482	0.766789	0.80213	0.836356	0.863872	0.901024
27.5	0.682596	0.714077	0.745164	0.772224	0.802205	0.838209	0.86605	0.89882
27.6	0.682174	0.710553	0.743929	0.768788	0.798485	0.8365	0.864233	0.897113
27.7	0.681837	0.70541	0.746658	0.766593	0.799064	0.835384	0.861389	0.897844
27.8	0.68065	0.708392	0.744002	0.765726	0.797718	0.833354	0.862072	0.894404
27.9	0.676648	0.709173	0.741104	0.765301	0.798589	0.835295	0.860978	0.894937
28	0.675734	0.705962	0.743239	0.763327	0.798771	0.828404	0.856469	0.893221
28.1	0.681482	0.706506	0.740029	0.762757	0.794886	0.828137	0.858931	0.895262
28.2	0.677611	0.703361	0.739263	0.759633	0.7942	0.83027	0.856336	0.894133
28.3	0.6767	0.703464	0.738119	0.763858	0.792342	0.829518	0.856198	0.889338
28.4	0.678712	0.707199	0.735401	0.765019	0.789373	0.830221	0.853865	0.895203
28.5	0.676119	0.705909	0.739517	0.761503	0.794056	0.823632	0.853256	0.888189
28.6	0.675721	0.705578	0.739274	0.75897	0.791293	0.828526	0.854407	0.889123
28.7	0.675797	0.705547	0.735318	0.761389	0.791869	0.826355	0.853585	0.88757
28.8	0.676857	0.701565	0.737139	0.758267	0.788532	0.821478	0.85176	0.888774
28.9	0.671485	0.702991	0.73627	0.755403	0.787519	0.823746	0.852745	0.883925
29	0.670071	0.695519	0.735313	0.75779	0.786564	0.820381	0.849466	0.880636
29.1	0.674749	0.698213	0.729202	0.753801	0.786033	0.823607	0.854035	0.883874
29.2	0.672797	0.69777	0.733417	0.757605	0.78899	0.823035	0.847567	0.880461
29.3	0.6711	0.693356	0.730353	0.754504	0.784309	0.822579	0.843223	0.879517
29.4	0.671184	0.694327	0.731387	0.754128	0.782522	0.819799	0.846616	0.87738
29.5	0.66998	0.697564	0.730821	0.753199	0.784967	0.817565	0.844013	0.88208
29.6	0.668576	0.694564	0.728981	0.756829	0.785474	0.816092	0.843772	0.878859
29.7	0.667271	0.696779	0.725912	0.753184	0.778735	0.814417	0.846361	0.872232
29.8	0.667847	0.695312	0.729022	0.751659	0.784649	0.818102	0.846636	0.875178
29.9	0.665067	0.692964	0.727299	0.750021	0.779918	0.813107	0.842391	0.87892

## Sheet: DL n=4
x correct	18.1333	16.4	14.6667	12.9333	11.2	9.46663	7.73329	5.99995
time	100	158.382	250.848	397.299	629.249	996.618	1578.46	2500
0	0.00565889	0.00873275	0.00995486	0.0117057	0.0117615	0.0136132	0.0130208	0.0185495
0.1	0.00859992	0.0141871	0.0163258	0.0199921	0.0189161	0.0223141	0.0207014	0.0271733
0.2	0.0125585	0.0209432	0.0250771	0.0307068	0.0297796	0.033159	0.0319076	0.039134
0.3	0.0177631	0.0293279	0.0358077	0.0444236	0.0440118	0.0476277	0.0455129	0.0540118
0.4	0.0239135	0.0392775	0.0490836	0.0616128	0.0585655	0.0642563	0.0615251	0.0733238
0.5	0.0304039	0.0504757	0.0648222	0.0787994	0.0788578	0.0847983	0.0808344	0.0934407
0.6	0.0380607	0.0632653	0.0812064	0.0975162	0.100404	0.104753	0.102808	0.114206
0.7	0.0467908	0.0754837	0.0967139	0.117027	0.119254	0.126539	0.125633	0.138502
0.8	0.0555979	0.0895141	0.114578	0.136541	0.139594	0.149368	0.146244	0.16106
0.9	0.0645087	0.10304	0.132716	0.160229	0.16219	0.170898	0.171884	0.187716
1	0.0745698	0.116974	0.151052	0.177641	0.184544	0.195853	0.191568	0.21346
1.1	0.0840252	0.131464	0.16774	0.198125	0.204892	0.216802	0.214472	0.237283
1.2	0.0950507	0.147617	0.185035	0.215891	0.226557	0.239748	0.238656	0.263909
1.3	0.103204	0.161762	0.202729	0.236395	0.246095	0.260471	0.261507	0.285883
1.4	0.11758	0.175325	0.221542	0.255317	0.2663	0.28135	0.279849	0.310227
1.5	0.124955	0.189275	0.238797	0.273803	0.284993	0.300203	0.303489	0.332432
1.6	0.136084	0.202875	0.254592	0.296526	0.304679	0.321244	0.324124	0.355686
1.7	0.147283	0.218393	0.270479	0.311598	0.321669	0.338495	0.345912	0.376746
1.8	0.160016	0.230662	0.284233	0.325846	0.342387	0.360492	0.362591	0.396266
1.9	0.169995	0.24241	0.298912	0.346746	0.357634	0.37723	0.383093	0.417929
2	0.17808	0.257684	0.315065	0.356693	0.373208	0.392698	0.403136	0.439735
2.1	0.18999	0.26948	0.329366	0.375941	0.387711	0.40998	0.418904	0.456508
2.2	0.200229	0.282634	0.341834	0.390253	0.405126	0.428128	0.433327	0.473981
2.3	0.214161	0.295365	0.356212	0.407092	0.418431	0.43985	0.453973	0.494916
2.4	0.223553	0.307286	0.371359	0.418585	0.432119	0.454148	0.469526	0.505852
2.5	0.22974	0.319592	0.378832	0.432355	0.445169	0.466717	0.478458	0.522135
2.6	0.242495	0.32905	0.393872	0.444387	0.460572	0.484799	0.4907	0.539744
2.7	0.252307	0.34249	0.404868	0.457961	0.472929	0.497552	0.507461	0.552515
2.8	0.26155	0.351608	0.417985	0.46723	0.485007	0.509914	0.518854	0.566734
2.9	0.273417	0.361685	0.429191	0.482129	0.495203	0.520286	0.534624	0.584999
3	0.27974	0.372477	0.443705	0.494544	0.50921	0.537175	0.546869	0.595203
3.1	0.289337	0.384292	0.452291	0.502092	0.521162	0.542674	0.558338	0.61019
3.2	0.300588	0.393014	0.458365	0.514972	0.532427	0.553466	0.569643	0.618219
3.3	0.309517	0.405822	0.472719	0.523275	0.543229	0.564919	0.583232	0.632454
3.4	0.314427	0.412161	0.482642	0.533987	0.551513	0.57298	0.591529	0.645326
3.5	0.327158	0.419905	0.491292	0.545347	0.560076	0.58697	0.600095	0.653246
3.6	0.335447	0.427735	0.498636	0.551893	0.567855	0.593604	0.61282	0.666288
3.7	0.342381	0.439215	0.508843	0.559802	0.583386	0.601925	0.619093	0.676859
3.8	0.34774	0.446279	0.516447	0.571471	0.584292	0.613973	0.62909	0.686896
3.9	0.360176	0.457305	0.527499	0.574287	0.595079	0.620488	0.643586	0.696115
4	0.368505	0.463854	0.531967	0.58823	0.601569	0.632029	0.648878	0.704274
4.1	0.375389	0.472368	0.538232	0.591981	0.607701	0.639635	0.655764	0.715074
4.2	0.383367	0.478673	0.547584	0.603317	0.622698	0.645222	0.663854	0.726211
4.3	0.3899	0.486109	0.556542	0.605966	0.624943	0.655089	0.676362	0.733591
4.4	0.398673	0.491346	0.560769	0.616859	0.633915	0.659805	0.682093	0.741012
4.5	0.403702	0.502451	0.570897	0.621022	0.64197	0.668102	0.690738	0.745432
4.6	0.412095	0.510485	0.575923	0.631404	0.64722	0.677539	0.696782	0.754627
4.7	0.417504	0.515822	0.582895	0.637815	0.65214	0.683769	0.705313	0.767417
4.8	0.426895	0.52057	0.590087	0.643184	0.659872	0.689226	0.707103	0.774489
4.9	0.433179	0.530217	0.594792	0.64899	0.667757	0.693267	0.71908	0.777595
5	0.440339	0.535408	0.597342	0.654207	0.673325	0.70344	0.719287	0.7864
5.1	0.443216	0.53565	0.605538	0.658004	0.680621	0.708822	0.728432	0.794048
5.2	0.449132	0.540565	0.614353	0.659829	0.68446	0.717284	0.73705	0.800775
5.3	0.455976	0.550315	0.617135	0.670942	0.688719	0.722149	0.744141	0.80534
5.4	0.464106	0.556758	0.622348	0.679747	0.696599	0.724048	0.746136	0.814503
5.5	0.469837	0.560251	0.629683	0.676035	0.701978	0.72951	0.754468	0.823613
5.6	0.476949	0.566864	0.634396	0.686867	0.705448	0.733968	0.759152	0.82441
5.7	0.480216	0.576317	0.638979	0.687172	0.707954	0.740799	0.761535	0.831137
5.8	0.486874	0.576548	0.646747	0.698796	0.70853	0.74777	0.76917	0.836235
5.9	0.489353	0.580559	0.65001	0.699763	0.719803	0.750201	0.775738	0.84297
6	0.496587	0.58667	0.653588	0.708299	0.725137	0.752935	0.783238	0.84733
6.1	0.503763	0.594069	0.658912	0.709574	0.729943	0.762282	0.782287	0.850937
6.2	0.504911	0.597754	0.664973	0.710818	0.730807	0.765852	0.78984	0.860805
6.3	0.514778	0.600969	0.670124	0.71853	0.737513	0.770924	0.790653	0.862404
6.4	0.518636	0.607767	0.671529	0.722722	0.738272	0.77103	0.796963	0.863855
6.5	0.524114	0.607743	0.674484	0.725525	0.74742	0.776761	0.80094	0.874962
6.6	0.525363	0.611309	0.678041	0.729933	0.748429	0.778156	0.80705	0.878145
6.7	0.530403	0.615815	0.682377	0.73493	0.750294	0.78383	0.812794	0.88259
6.8	0.535392	0.62362	0.688248	0.740031	0.754864	0.787375	0.815504	0.883281
6.9	0.538514	0.630371	0.692029	0.741551	0.76005	0.792956	0.815185	0.888028
7	0.544486	0.631479	0.692138	0.744298	0.761144	0.794906	0.819147	0.892476
7.1	0.546582	0.636606	0.700661	0.749245	0.766503	0.79849	0.824091	0.897975
7.2	0.551521	0.638772	0.704154	0.754407	0.767375	0.803955	0.830183	0.901033
7.3	0.558296	0.640103	0.707151	0.754091	0.77649	0.804697	0.830209	0.90059
7.4	0.562467	0.645477	0.708634	0.756997	0.776628	0.80975	0.834691	0.90394
7.5	0.562268	0.649457	0.715456	0.762305	0.779136	0.813544	0.837144	0.910677
7.6	0.567757	0.655855	0.712964	0.766647	0.78174	0.817949	0.839798	0.91513
7.7	0.57086	0.655058	0.716519	0.765722	0.782468	0.818785	0.843004	0.916458
7.8	0.576099	0.662993	0.722271	0.769032	0.78899	0.819187	0.850895	0.924774
7.9	0.57816	0.664914	0.724707	0.772146	0.788514	0.820993	0.848894	0.922221
8	0.582507	0.666537	0.723987	0.774856	0.791862	0.82483	0.852221	0.925709
8.1	0.582972	0.667789	0.726694	0.77763	0.794564	0.825759	0.855783	0.930797
8.2	0.588418	0.672082	0.734479	0.776296	0.794109	0.832428	0.860558	0.935311
8.3	0.590905	0.67303	0.735958	0.777935	0.797901	0.83484	0.862457	0.933663
8.4	0.590817	0.676293	0.73679	0.783735	0.801097	0.835839	0.860666	0.938738
8.5	0.597403	0.679648	0.736344	0.785804	0.804386	0.838836	0.864227	0.945127
8.6	0.6009	0.681947	0.739601	0.79103	0.8087	0.839636	0.867436	0.939787
8.7	0.603057	0.681572	0.744614	0.790935	0.80539	0.841628	0.871657	0.944551
8.8	0.605668	0.685698	0.744417	0.790023	0.808676	0.842651	0.871487	0.94522
8.9	0.60794	0.692313	0.750379	0.800791	0.80929	0.849946	0.875924	0.947123
9	0.610655	0.693264	0.748987	0.794388	0.814075	0.847622	0.876232	0.9497
9.1	0.610945	0.692239	0.752276	0.797643	0.812816	0.853222	0.877035	0.953958
9.2	0.616466	0.69904	0.752279	0.80179	0.817749	0.852635	0.879229	0.95869
9.3	0.620929	0.698522	0.753116	0.802627	0.81874	0.854753	0.884543	0.956432
9.4	0.621885	0.701851	0.758108	0.802321	0.823267	0.856304	0.883095	0.957944
9.5	0.624173	0.699128	0.758719	0.803647	0.820185	0.856203	0.888214	0.962075
9.6	0.625947	0.705318	0.764614	0.811936	0.823918	0.859745	0.887702	0.956567
9.7	0.626415	0.708737	0.762656	0.808443	0.82704	0.859001	0.887101	0.961429
9.8	0.632233	0.71027	0.765828	0.808312	0.830998	0.864808	0.890621	0.966222
9.9	0.631476	0.70718	0.76484	0.812786	0.827752	0.86496	0.896121	0.967914
10	0.6334	0.71425	0.772329	0.814303	0.830449	0.861594	0.892622	0.972816
10.1	0.634375	0.715387	0.76997	0.813132	0.832149	0.874096	0.895563	0.970824
10.2	0.639021	0.718286	0.772983	0.816907	0.832529	0.86835	0.894681	0.975191
10.3	0.639861	0.722154	0.776389	0.817449	0.832513	0.867927	0.896583	0.975274
10.4	0.641521	0.722574	0.776333	0.822391	0.837043	0.874471	0.896363	0.975481
10.5	0.648036	0.718703	0.771492	0.821859	0.841179	0.870419	0.900412	0.975446
10.6	0.645926	0.721798	0.776607	0.820627	0.84052	0.876155	0.90292	0.98026
10.7	0.649412	0.72666	0.774944	0.82407	0.834774	0.87217	0.905236	0.979495
10.8	0.64955	0.725629	0.784155	0.819877	0.837986	0.878174	0.901331	0.981477
10.9	0.653819	0.730031	0.780486	0.825608	0.840077	0.880794	0.906588	0.976761
11	0.651867	0.729301	0.780525	0.825557	0.840321	0.878573	0.906185	0.985098
11.1	0.653857	0.735337	0.781814	0.820512	0.84458	0.878039	0.907096	0.983313
11.2	0.658134	0.729253	0.781477	0.828382	0.835826	0.879588	0.911177	0.983706
11.3	0.657717	0.733246	0.788589	0.831928	0.839264	0.879984	0.912226	0.987604
11.4	0.65921	0.731904	0.789856	0.830645	0.846843	0.879994	0.912327	0.983642
11.5	0.662512	0.735948	0.787542	0.829107	0.850281	0.882059	0.913839	0.992221
11.6	0.66421	0.736014	0.790239	0.833982	0.846277	0.883403	0.916782	0.98648
11.7	0.663341	0.73691	0.791105	0.834447	0.849633	0.884035	0.915558	0.989091
11.8	0.664787	0.740541	0.786237	0.832144	0.851541	0.883509	0.914261	0.989075
11.9	0.664898	0.741681	0.79073	0.835188	0.851418	0.883568	0.916373	0.990048
12	0.666646	0.741947	0.794213	0.834856	0.847659	0.88607	0.916041	0.989803
12.1	0.665193	0.737279	0.790276	0.833445	0.848809	0.884298	0.919747	0.988371
12.2	0.670403	0.74476	0.787367	0.836849	0.851974	0.88466	0.922537	0.987999
12.3	0.670602	0.7459	0.79294	0.835066	0.85475	0.887595	0.921806	0.99029
12.4	0.670746	0.745958	0.792946	0.833631	0.852728	0.890762	0.918541	0.994562
12.5	0.674633	0.750847	0.790672	0.838607	0.852322	0.891966	0.921668	0.990691
12.6	0.679813	0.752045	0.79476	0.836017	0.851376	0.885805	0.92246	0.998526
12.7	0.678094	0.751264	0.796458	0.837638	0.853671	0.892625	0.921073	0.993448
12.8	0.675727	0.74777	0.79484	0.833512	0.857696	0.888823	0.922099	0.990093
12.9	0.680209	0.753219	0.795719	0.840542	0.855943	0.889423	0.92487	0.991716
13	0.678979	0.750937	0.798071	0.836517	0.854152	0.889248	0.925935	0.991366
13.1	0.684192	0.760326	0.797901	0.838708	0.854729	0.891416	0.928278	0.993658
13.2	0.678958	0.755507	0.796689	0.841206	0.85361	0.891575	0.923916	0.99208
13.3	0.677133	0.753137	0.796612	0.837986	0.856062	0.893451	0.922473	0.994708
13.4	0.681373	0.755919	0.800069	0.837898	0.856564	0.894527	0.923539	0.994572
13.5	0.68217	0.753166	0.802178	0.843249	0.854083	0.890183	0.928151	0.995101
13.6	0.682295	0.757401	0.797627	0.836942	0.853174	0.893204	0.927399	0.98966
13.7	0.687196	0.758326	0.802348	0.839976	0.853036	0.892521	0.926052	0.994556
13.8	0.68865	0.758403	0.79705	0.841703	0.85716	0.893135	0.927412	0.993496
13.9	0.686713	0.754388	0.800951	0.84497	0.855844	0.889907	0.921511	0.992282
14	0.68615	0.757948	0.801028	0.841238	0.85967	0.894192	0.924835	0.993961
14.1	0.689502	0.75827	0.799604	0.843475	0.856479	0.894787	0.930887	0.99335
14.2	0.688012	0.758692	0.801609	0.84127	0.860273	0.894102	0.927014	0.996211
14.3	0.691216	0.759054	0.80306	0.838639	0.857656	0.8964	0.926326	0.994089
14.4	0.691925	0.761235	0.80717	0.842678	0.858052	0.892842	0.925948	0.992699
14.5	0.692542	0.760278	0.798589	0.839652	0.855348	0.893717	0.925892	0.993215
14.6	0.693974	0.756198	0.800209	0.84162	0.860178	0.891397	0.922797	0.996339
14.7	0.685812	0.760632	0.801617	0.840587	0.858477	0.894718	0.929838	0.996623
14.8	0.692536	0.762321	0.803124	0.838055	0.856936	0.893645	0.929657	0.99737
14.9	0.69713	0.762335	0.800616	0.839928	0.859774	0.892566	0.922824	1
15	0.695382	0.763812	0.803095	0.841676	0.861426	0.889341	0.926461	0.997787
15.1	0.695937	0.765074	0.80649	0.8425	0.855496	0.893546	0.93026	0.994665
15.2	0.700616	0.761936	0.803158	0.842226	0.863892	0.895895	0.926612	0.99504
15.3	0.697608	0.76281	0.802547	0.841131	0.854713	0.89411	0.930951	0.992949
15.4	0.694239	0.766206	0.801352	0.840733	0.856756	0.897189	0.923299	0.98919
15.5	0.69874	0.764426	0.801046	0.845802	0.859123	0.895536	0.930736	0.986969
15.6	0.699633	0.763193	0.808073	0.841089	0.858469	0.892696	0.925542	0.995537
15.7	0.696049	0.764689	0.802707	0.838934	0.859612	0.893887	0.928284	0.995199
15.8	0.696362	0.760289	0.805488	0.83801	0.861788	0.891886	0.922638	0.993773
15.9	0.69692	0.7642	0.802648	0.839471	0.858073	0.897279	0.929213	0.991934
16	0.702404	0.762032	0.801184	0.842484	0.859628	0.895063	0.923578	0.99254
16.1	0.698232	0.762882	0.807157	0.842377	0.855937	0.888376	0.924075	0.990462
16.2	0.704	0.767321	0.805847	0.842263	0.859003	0.895417	0.927053	0.990622
16.3	0.701753	0.765828	0.803437	0.840991	0.864567	0.896036	0.924811	0.989224
16.4	0.702672	0.763955	0.804612	0.837927	0.859099	0.892516	0.927598	0.989652
16.5	0.700068	0.769476	0.799861	0.839123	0.854923	0.890082	0.92412	0.987875
16.6	0.699981	0.765494	0.806105	0.839171	0.857122	0.889827	0.926825	0.991565
16.7	0.703339	0.764999	0.807306	0.837701	0.855544	0.888326	0.923374	0.986876
16.8	0.705183	0.766498	0.801878	0.842085	0.857375	0.893015	0.922603	0.991188
16.9	0.706827	0.766583	0.804091	0.839277	0.858416	0.89221	0.926929	0.984766
17	0.703405	0.765714	0.803225	0.838026	0.857101	0.892486	0.927694	0.987205
17.1	0.701816	0.765964	0.804771	0.837903	0.859046	0.891727	0.921963	0.986095
17.2	0.703849	0.763708	0.803955	0.842587	0.852279	0.891758	0.925438	0.986177
17.3	0.703814	0.76586	0.806041	0.841437	0.860839	0.892006	0.923756	0.983943
17.4	0.704478	0.762454	0.803852	0.839253	0.854264	0.895148	0.923276	0.988196
17.5	0.707616	0.761275	0.803591	0.837051	0.854253	0.890483	0.92238	0.985592
17.6	0.707898	0.769715	0.806854	0.840898	0.854779	0.891825	0.923624	0.985707
17.7	0.707765	0.764319	0.805401	0.839349	0.856907	0.891562	0.923966	0.982075
17.8	0.701705	0.76352	0.80463	0.841115	0.857274	0.888459	0.925717	0.98272
17.9	0.699959	0.762675	0.806814	0.837173	0.856246	0.887561	0.920428	0.980197
18	0.706785	0.761171	0.807093	0.83657	0.855337	0.890515	0.919867	0.98632
18.1	0.704096	0.767239	0.802606	0.836854	0.854017	0.885728	0.921798	0.991552
18.2	0.705201	0.765749	0.802895	0.841517	0.85255	0.892053	0.919947	0.978871
18.3	0.707587	0.765661	0.807064	0.835759	0.854086	0.886843	0.92381	0.981931
18.4	0.708389	0.760812	0.800223	0.832547	0.850621	0.890964	0.921689	0.981267
18.5	0.705918	0.764075	0.79844	0.840488	0.854325	0.889176	0.919798	0.974984
18.6	0.706019	0.76619	0.800066	0.836307	0.851878	0.887088	0.921418	0.979413
18.7	0.707149	0.764495	0.800132	0.837005	0.855446	0.885948	0.917242	0.976456
18.8	0.70467	0.764736	0.80154	0.837069	0.853267	0.888137	0.922625	0.981629
18.9	0.706346	0.764835	0.797951	0.837024	0.851915	0.886572	0.920008	0.976355
19	0.708182	0.762919	0.797207	0.834853	0.852736	0.88378	0.914197	0.975367
19.1	0.7081	0.765116	0.798698	0.830316	0.851753	0.889431	0.916628	0.976947
19.2	0.703503	0.767069	0.79569	0.83332	0.851107	0.887933	0.920584	0.972112
19.3	0.703153	0.762066	0.795265	0.832542	0.846819	0.888448	0.914968	0.975632
19.4	0.706577	0.761445	0.797433	0.835374	0.850199	0.88928	0.920013	0.973074
19.5	0.703294	0.765701	0.796609	0.831493	0.849397	0.884742	0.913589	0.97564
19.6	0.707624	0.764046	0.797484	0.833081	0.847648	0.886921	0.91611	0.970422
19.7	0.701885	0.762223	0.795063	0.832988	0.848929	0.882085	0.914769	0.972356
19.8	0.705969	0.762914	0.796049	0.832922	0.847502	0.883289	0.911158	0.970677
19.9	0.703923	0.762608	0.795515	0.830377	0.853052	0.87971	0.91022	0.970284
20	0.705307	0.760225	0.799051	0.831615	0.845438	0.88301	0.912431	0.96792
20.1	0.700435	0.763126	0.797284	0.830988	0.84369	0.877056	0.916286	0.967566
20.2	0.702247	0.76009	0.794582	0.826551	0.847287	0.881299	0.915457	0.970874
20.3	0.704792	0.760475	0.797	0.826825	0.841384	0.877476	0.916493	0.969073
20.4	0.703395	0.760618	0.792784	0.828188	0.843299	0.878347	0.910709	0.966878
20.5	0.708389	0.763671	0.789314	0.825669	0.844941	0.880855	0.913167	0.966687
20.6	0.702093	0.759279	0.793241	0.825557	0.840945	0.876349	0.911033	0.961528
20.7	0.702765	0.759808	0.790927	0.828368	0.849006	0.877322	0.913714	0.968071
20.8	0.705711	0.760454	0.790531	0.825451	0.841296	0.872627	0.912	0.965324
20.9	0.706878	0.758445	0.792725	0.828119	0.841912	0.87386	0.907577	0.961687
21	0.701378	0.764	0.791564	0.82509	0.841857	0.874096	0.912149	0.96839
21.1	0.702494	0.758706	0.790881	0.82318	0.841833	0.876086	0.911923	0.965234
21.2	0.702056	0.758073	0.792584	0.826347	0.842784	0.87386	0.904649	0.96217
21.3	0.703522	0.753007	0.792794	0.823132	0.837462	0.870528	0.907117	0.962864
21.4	0.700531	0.758071	0.791965	0.825504	0.838634	0.876835	0.904848	0.958371
21.5	0.69908	0.756288	0.790828	0.821809	0.837109	0.873541	0.904678	0.95467
21.6	0.70111	0.755385	0.787074	0.819814	0.837138	0.872845	0.901721	0.961225
21.7	0.701506	0.755355	0.790536	0.818769	0.839928	0.874992	0.902351	0.964224
21.8	0.702988	0.755653	0.790812	0.821782	0.835714	0.87183	0.899599	0.957125
21.9	0.702582	0.75294	0.786588	0.819383	0.836971	0.870478	0.904062	0.955231
22	0.698134	0.757866	0.787104	0.816352	0.834147	0.870579	0.90144	0.951251
22.1	0.700254	0.756628	0.783937	0.820656	0.835042	0.870348	0.900114	0.95792
22.2	0.701049	0.756038	0.787117	0.819038	0.837197	0.87107	0.90165	0.95169
22.3	0.698679	0.751652	0.784008	0.819896	0.833111	0.8659	0.900669	0.950571
22.4	0.698913	0.754572	0.781267	0.815085	0.829957	0.867354	0.900332	0.9533
22.5	0.698501	0.752133	0.782576	0.817502	0.831336	0.868695	0.900143	0.951076
22.6	0.70001	0.750608	0.779489	0.816966	0.82327	0.866878	0.896535	0.949142
22.7	0.702568	0.750565	0.781833	0.815385	0.835518	0.860914	0.900207	0.9472
22.8	0.698836	0.753039	0.781811	0.810268	0.830249	0.864423	0.896713	0.945685
22.9	0.697839	0.749699	0.785318	0.81102	0.828137	0.863339	0.901161	0.953401
23	0.697802	0.750507	0.77709	0.815584	0.827417	0.866827	0.898283	0.942938
23.1	0.693809	0.748094	0.777895	0.81132	0.826639	0.859583	0.895406	0.948268
23.2	0.696205	0.748899	0.778156	0.814109	0.827654	0.859686	0.896705	0.946578
23.3	0.695658	0.752327	0.780799	0.811155	0.826062	0.864128	0.892468	0.942083
23.4	0.698108	0.742377	0.775047	0.806514	0.823196	0.863329	0.892959	0.943711
23.5	0.693992	0.745302	0.778472	0.809561	0.823052	0.858987	0.891735	0.9411
23.6	0.695929	0.748533	0.777414	0.809721	0.824072	0.860308	0.891325	0.942123
23.7	0.691819	0.747056	0.777699	0.807906	0.820781	0.858963	0.889498	0.941522
23.8	0.692983	0.745026	0.777364	0.805804	0.822662	0.858212	0.886992	0.943759
23.9	0.69399	0.744874	0.776745	0.806171	0.820302	0.859551	0.882808	0.940013
24	0.696046	0.744327	0.772204	0.809431	0.819822	0.856142	0.884237	0.940616
24.1	0.694029	0.743836	0.77616	0.806272	0.822117	0.857303	0.886546	0.933177
24.2	0.693384	0.7429	0.773642	0.805619	0.823073	0.854115	0.883828	0.939917
24.3	0.692138	0.740334	0.772531	0.799543	0.819641	0.855552	0.887359	0.935032
24.4	0.694396	0.747717	0.773878	0.806105	0.819771	0.85781	0.885938	0.937293
24.5	0.694556	0.744131	0.771429	0.806671	0.817037	0.851891	0.881068	0.933002
24.6	0.693918	0.739008	0.767558	0.802914	0.816519	0.853576	0.885263	0.930831
24.7	0.691131	0.740517	0.767866	0.799527	0.815844	0.853416	0.881551	0.932253
24.8	0.692255	0.739468	0.767531	0.799455	0.812972	0.851107	0.881623	0.931976
24.9	0.691152	0.736487	0.768243	0.799713	0.816208	0.848647	0.881509	0.93191
25	0.690717	0.740092	0.768892	0.799989	0.814266	0.849628	0.878568	0.92615
25.1	0.689277	0.737351	0.765509	0.796936	0.817027	0.851007	0.875515	0.932146
25.2	0.68947	0.741338	0.764529	0.797786	0.810696	0.846628	0.877773	0.926562
25.3	0.686888	0.736073	0.767521	0.797794	0.813469	0.846389	0.879025	0.928919
25.4	0.686229	0.737611	0.765238	0.796277	0.806227	0.847518	0.877638	0.923621
25.5	0.686731	0.735549	0.762343	0.796556	0.807712	0.843047	0.877818	0.926126
25.6	0.68413	0.739848	0.763068	0.789758	0.811192	0.841131	0.875534	0.92292
25.7	0.687066	0.735398	0.764646	0.797723	0.80602	0.844099	0.8756	0.924328
25.8	0.687908	0.737348	0.764131	0.788397	0.811089	0.84344	0.872824	0.925034
25.9	0.685074	0.734978	0.762736	0.791886	0.803334	0.842598	0.874604	0.921945
26	0.682627	0.732996	0.759835	0.792189	0.809062	0.840247	0.876137	0.921211
26.1	0.686516	0.730371	0.757345	0.79281	0.804197	0.841997	0.874094	0.915443
26.2	0.684428	0.730573	0.761689	0.792319	0.805233	0.842295	0.870473	0.921918
26.3	0.684287	0.732956	0.757922	0.790486	0.804904	0.843764	0.871785	0.919338
26.4	0.684343	0.731838	0.760674	0.786453	0.803506	0.841923	0.86844	0.914697
26.5	0.680159	0.73078	0.758344	0.787866	0.804779	0.837149	0.869242	0.914641
26.6	0.683883	0.730201	0.7553	0.784864	0.801291	0.83692	0.863727	0.913084
26.7	0.68137	0.730656	0.75971	0.788838	0.801137	0.839808	0.86674	0.913023
26.8	0.681588	0.72908	0.753581	0.787385	0.802773	0.833031	0.867555	0.907829
26.9	0.681471	0.728862	0.754152	0.785377	0.798918	0.832521	0.86449	0.904035
27	0.67921	0.725116	0.753995	0.779311	0.802975	0.836084	0.86069	0.911312
27.1	0.676094	0.727733	0.753995	0.78246	0.797662	0.833047	0.865475	0.900133
27.2	0.67984	0.725903	0.753509	0.783302	0.796046	0.830658	0.864102	0.903977
27.3	0.679425	0.725268	0.749152	0.778211	0.796123	0.833121	0.862003	0.906496
27.4	0.678402	0.724978	0.74705	0.779309	0.791038	0.830749	0.855566	0.905946
27.5	0.677672	0.724237	0.744481	0.778729	0.794497	0.828366	0.856814	0.902771
27.6	0.677866	0.723767	0.747877	0.777903	0.797491	0.830557	0.859415	0.901737
27.7	0.676734	0.722659	0.750161	0.778108	0.795355	0.830985	0.860409	0.903536
27.8	0.676049	0.724633	0.752661	0.77653	0.795124	0.827717	0.859099	0.901671
27.9	0.675711	0.723825	0.746662	0.777454	0.792029	0.823645	0.859644	0.902117
28	0.677465	0.722095	0.746081	0.771644	0.787356	0.825839	0.856623	0.897255
28.1	0.672175	0.71971	0.744455	0.775286	0.792255	0.823969	0.856517	0.899351
28.2	0.676221	0.717746	0.745879	0.778363	0.790063	0.824245	0.853979	0.902423
28.3	0.673145	0.718219	0.743868	0.777433	0.788743	0.822534	0.850148	0.898175
28.4	0.674606	0.720052	0.746418	0.768929	0.787199	0.818289	0.854019	0.899136
28.5	0.670892	0.718413	0.740212	0.770754	0.789357	0.823661	0.852029	0.894774
28.6	0.67006	0.714109	0.743201	0.772335	0.786918	0.819327	0.849588	0.887888
28.7	0.669189	0.714901	0.741346	0.771455	0.786219	0.822154	0.845767	0.89077
28.8	0.667467	0.714117	0.740233	0.77552	0.782669	0.813084	0.847008	0.894014
28.9	0.668947	0.714008	0.74073	0.767622	0.785161	0.817369	0.848416	0.887811
29	0.667263	0.710855	0.736354	0.770903	0.781641	0.81246	0.848674	0.888283
29.1	0.666737	0.715863	0.737653	0.771421	0.783116	0.812925	0.842292	0.886586
29.2	0.667016	0.712388	0.733966	0.771657	0.779202	0.815645	0.844909	0.889761
29.3	0.664388	0.709502	0.73501	0.767247	0.779752	0.814099	0.847585	0.890279
29.4	0.666197	0.710661	0.732943	0.765865	0.783124	0.806166	0.844248	0.884606
29.5	0.664757	0.711298	0.7329	0.767364	0.779633	0.812784	0.840704	0.882377
29.6	0.663514	0.707191	0.734513	0.762704	0.777218	0.813193	0.842271	0.883844
29.7	0.664401	0.706569	0.731777	0.76548	0.774598	0.812231	0.840589	0.884219
29.8	0.662481	0.708745	0.729564	0.761928	0.774279	0.808347	0.836477	0.884219
29.9	0.661391	0.709635	0.736338	0.761232	0.776617	0.811453	0.842497	0.882348

## Sheet: DDL n=1
x correct	19	17.2667	15.5333	13.8	12.0666	10.3333	8.59996	6.86662
time	100	169.381	286.901	485.956	823.119	1394.21	2361.53	4000
0	0.00517084	0.00612662	0.00741933	0.00751903	0.00863296	0.0102832	0.0102007	0.0139619
0.1	0.00636384	0.00779407	0.00893551	0.0100804	0.0111256	0.0130337	0.0146358	0.0193116
0.2	0.00807599	0.00968844	0.012126	0.0148593	0.0146496	0.0178882	0.0197035	0.0257545
0.3	0.00991536	0.0135184	0.0163376	0.0204564	0.0210787	0.0250841	0.0278758	0.0340539
0.4	0.012212	0.0175616	0.0218935	0.0264043	0.0292029	0.033387	0.037021	0.0481294
0.5	0.0148971	0.0211544	0.0281783	0.0351782	0.0380868	0.0449526	0.0498037	0.0613384
0.6	0.0187649	0.0273876	0.0353535	0.0446191	0.0484216	0.0566867	0.0636866	0.0792919
0.7	0.0230865	0.0329538	0.0442581	0.0546892	0.0615584	0.0697719	0.0786249	0.0973692
0.8	0.0269234	0.0391629	0.0529358	0.0663889	0.0754653	0.0845762	0.0962862	0.116753
0.9	0.0321768	0.0465032	0.0627824	0.077841	0.0891763	0.100367	0.113865	0.140393
1	0.0367563	0.053534	0.0731756	0.0912598	0.103087	0.116715	0.133314	0.159172
1.1	0.0425391	0.0626758	0.08306	0.104544	0.118135	0.134861	0.153368	0.182733
1.2	0.0476927	0.0672484	0.0960284	0.115629	0.133768	0.149731	0.173508	0.204977
1.3	0.0534687	0.0787246	0.108629	0.132571	0.149817	0.168107	0.189911	0.229466
1.4	0.0606542	0.0868212	0.120408	0.14849	0.1669	0.186559	0.211932	0.253918
1.5	0.0670318	0.0965853	0.13046	0.159821	0.184569	0.203052	0.229628	0.271655
1.6	0.0727699	0.105325	0.144333	0.175269	0.200587	0.22115	0.24962	0.294686
1.7	0.0796082	0.114563	0.157185	0.190076	0.218647	0.239808	0.269341	0.316776
1.8	0.0861405	0.123602	0.16854	0.204031	0.233657	0.254083	0.288522	0.338126
1.9	0.09236	0.13448	0.179673	0.217313	0.24895	0.272033	0.307015	0.359817
2	0.0993255	0.144147	0.19325	0.234053	0.270895	0.288694	0.326664	0.376233
2.1	0.107199	0.15178	0.206534	0.244927	0.283695	0.303649	0.34242	0.402108
2.2	0.113532	0.162273	0.21886	0.262939	0.29614	0.321132	0.361243	0.420928
2.3	0.120597	0.173636	0.22949	0.276918	0.313984	0.334155	0.379242	0.438834
2.4	0.129831	0.181175	0.242789	0.288976	0.327743	0.350066	0.394194	0.454851
2.5	0.136532	0.19238	0.252697	0.302391	0.343132	0.36374	0.411793	0.471254
2.6	0.145172	0.201553	0.268055	0.31693	0.355894	0.378647	0.424614	0.490566
2.7	0.14851	0.209491	0.27653	0.327702	0.371386	0.391904	0.441735	0.50153
2.8	0.158267	0.220452	0.2901	0.34264	0.384622	0.406361	0.456942	0.523482
2.9	0.164215	0.23048	0.301954	0.35337	0.401232	0.420822	0.469415	0.538867
3	0.173055	0.237993	0.309642	0.365397	0.41015	0.432428	0.480492	0.551932
3.1	0.180598	0.249228	0.322479	0.376312	0.425521	0.444668	0.494362	0.567726
3.2	0.188457	0.257294	0.334354	0.390333	0.440374	0.457578	0.510517	0.578927
3.3	0.193446	0.264723	0.343531	0.400874	0.448519	0.468263	0.5233	0.591782
3.4	0.201401	0.276141	0.357506	0.412075	0.461628	0.480052	0.535907	0.605421
3.5	0.207514	0.281367	0.364424	0.424401	0.476766	0.48873	0.545162	0.619459
3.6	0.21658	0.290791	0.376299	0.434808	0.487049	0.501588	0.555256	0.633978
3.7	0.220881	0.298337	0.383636	0.445854	0.496559	0.512384	0.571549	0.644491
3.8	0.227991	0.311402	0.393984	0.453191	0.504772	0.519202	0.578487	0.649985
3.9	0.23889	0.318082	0.408524	0.465066	0.519975	0.530279	0.592893	0.662902
4	0.244982	0.326646	0.415248	0.47188	0.525662	0.537908	0.594949	0.676575
4.1	0.250902	0.332188	0.422692	0.482277	0.533978	0.548765	0.611929	0.681811
4.2	0.257063	0.341344	0.433367	0.490126	0.546527	0.554737	0.614556	0.69556
4.3	0.265738	0.351693	0.440305	0.499907	0.556463	0.562029	0.626476	0.707136
4.4	0.266123	0.357874	0.450269	0.507767	0.562342	0.577783	0.635669	0.713871
4.5	0.278551	0.365723	0.457674	0.51807	0.57058	0.581891	0.643645	0.722043
4.6	0.285744	0.375023	0.467651	0.526146	0.579254	0.586718	0.655149	0.73199
4.7	0.292496	0.377347	0.475002	0.530674	0.589561	0.595427	0.65976	0.736628
4.8	0.299493	0.387954	0.482487	0.53995	0.597201	0.604593	0.669438	0.746106
4.9	0.305678	0.395954	0.492856	0.546826	0.608515	0.613181	0.676555	0.75477
5	0.312072	0.398285	0.495754	0.55613	0.612741	0.621363	0.683028	0.767567
5.1	0.315555	0.409125	0.501695	0.561717	0.619696	0.626232	0.690953	0.768777
5.2	0.323105	0.415475	0.512422	0.571556	0.625723	0.629776	0.696519	0.776196
5.3	0.329751	0.420636	0.519057	0.575654	0.631035	0.643254	0.705909	0.781969
5.4	0.33597	0.429987	0.531458	0.583002	0.644147	0.646396	0.710471	0.794377
5.5	0.346762	0.433535	0.530361	0.589108	0.64829	0.653399	0.719523	0.79962
5.6	0.34602	0.443547	0.541315	0.595863	0.651776	0.654434	0.722882	0.806926
5.7	0.356798	0.446411	0.545547	0.601058	0.65605	0.662706	0.732237	0.813757
5.8	0.358686	0.453328	0.55253	0.608619	0.665205	0.668613	0.737669	0.819155
5.9	0.36606	0.457574	0.555769	0.616832	0.668245	0.675826	0.739426	0.82174
6	0.372348	0.465155	0.565003	0.620758	0.677307	0.680794	0.747702	0.829851
6.1	0.375185	0.472059	0.569775	0.623206	0.680391	0.683953	0.753962	0.828812
6.2	0.384914	0.478715	0.570095	0.632303	0.686762	0.688474	0.75892	0.84035
6.3	0.387259	0.47789	0.579123	0.640269	0.695495	0.693006	0.763812	0.844163
6.4	0.394359	0.487069	0.586825	0.64281	0.702863	0.701443	0.769434	0.850269
6.5	0.399561	0.493468	0.588719	0.646241	0.701343	0.701982	0.773941	0.849967
6.6	0.403246	0.500942	0.594577	0.648675	0.706933	0.711475	0.778297	0.856826
6.7	0.409569	0.506329	0.60122	0.657604	0.714844	0.70835	0.781027	0.866084
6.8	0.413729	0.507492	0.599965	0.660045	0.721707	0.714284	0.786706	0.871877
6.9	0.420481	0.507993	0.608154	0.665298	0.724608	0.719812	0.793562	0.877791
7	0.423225	0.520023	0.613779	0.667096	0.723632	0.724725	0.797179	0.87449
7.1	0.431844	0.523186	0.62082	0.675784	0.735682	0.724498	0.797223	0.881346
7.2	0.432212	0.525122	0.619816	0.679683	0.740939	0.734087	0.801284	0.882724
7.3	0.441563	0.535807	0.629577	0.683864	0.743428	0.739357	0.808717	0.88707
7.4	0.443251	0.537217	0.633397	0.690197	0.748358	0.741162	0.807486	0.891333
7.5	0.451757	0.54312	0.635955	0.6857	0.749125	0.746485	0.814792	0.893922
7.6	0.454068	0.545279	0.647403	0.69435	0.752769	0.749685	0.820272	0.903195
7.7	0.456075	0.550852	0.642738	0.697289	0.759436	0.750497	0.822627	0.906547
7.8	0.459988	0.552014	0.652385	0.700755	0.764008	0.758061	0.822235	0.90732
7.9	0.467534	0.557137	0.652911	0.7076	0.763407	0.762049	0.825103	0.913227
8	0.467156	0.56302	0.658491	0.707274	0.766824	0.759704	0.833113	0.919336
8.1	0.473864	0.564013	0.65921	0.710571	0.768808	0.762166	0.83781	0.919625
8.2	0.478526	0.569779	0.661465	0.709085	0.77173	0.763898	0.83726	0.922101
8.3	0.481679	0.575692	0.664927	0.717832	0.77893	0.769963	0.843685	0.926518
8.4	0.490432	0.576786	0.67073	0.717601	0.782261	0.775849	0.847172	0.923737
8.5	0.48938	0.583363	0.674138	0.721858	0.779817	0.774247	0.84493	0.931524
8.6	0.4953	0.582331	0.676826	0.725585	0.782986	0.776172	0.848461	0.933003
8.7	0.498456	0.588042	0.680398	0.727355	0.786112	0.779882	0.849602	0.938232
8.8	0.50207	0.593288	0.682375	0.736174	0.788608	0.779717	0.853852	0.936513
8.9	0.505511	0.593852	0.686724	0.736497	0.791523	0.781807	0.859944	0.941835
9	0.513075	0.597397	0.687161	0.7321	0.795429	0.791138	0.861804	0.941409
9.1	0.518253	0.600491	0.691015	0.739749	0.793191	0.790248	0.863038	0.942939
9.2	0.513687	0.606497	0.695467	0.740918	0.800947	0.79437	0.861257	0.946191
9.3	0.516802	0.606528	0.696014	0.740385	0.804072	0.797729	0.869852	0.945806
9.4	0.520762	0.613157	0.702474	0.743177	0.806056	0.798887	0.868893	0.947126
9.5	0.525923	0.607969	0.704936	0.747733	0.808232	0.798334	0.868267	0.955512
9.6	0.53523	0.613205	0.705654	0.753196	0.809126	0.798643	0.876715	0.953572
9.7	0.533865	0.617936	0.711258	0.755014	0.811863	0.803742	0.876863	0.958981
9.8	0.539314	0.618792	0.707201	0.755692	0.81692	0.804849	0.879771	0.958417
9.9	0.539029	0.619607	0.70945	0.761499	0.816425	0.805251	0.878313	0.961717
10	0.543667	0.625675	0.715618	0.75749	0.8189	0.798846	0.880651	0.966252
10.1	0.545558	0.628226	0.7182	0.764875	0.82108	0.807235	0.879359	0.959981
10.2	0.548844	0.628869	0.718354	0.766628	0.821967	0.812344	0.881215	0.968782
10.3	0.552138	0.635284	0.72107	0.768268	0.823707	0.812609	0.877265	0.972245
10.4	0.558024	0.633954	0.722906	0.764851	0.824291	0.816315	0.888624	0.96431
10.5	0.560307	0.637007	0.723295	0.767897	0.828809	0.816301	0.888655	0.967775
10.6	0.560386	0.639193	0.725567	0.765696	0.826299	0.813179	0.887644	0.971406
10.7	0.565481	0.644288	0.729298	0.772504	0.831649	0.81956	0.887259	0.969841
10.8	0.565213	0.643676	0.729707	0.766752	0.837091	0.820544	0.889907	0.97539
10.9	0.570504	0.648063	0.731144	0.770259	0.83705	0.816109	0.890357	0.973723
11	0.574678	0.648961	0.734245	0.777688	0.835283	0.826684	0.891646	0.977618
11.1	0.575321	0.650896	0.735552	0.776877	0.837088	0.828245	0.891877	0.973946
11.2	0.577267	0.651354	0.736727	0.779985	0.839133	0.823628	0.894359	0.97386
11.3	0.581499	0.649459	0.738811	0.78037	0.846401	0.822748	0.896133	0.976033
11.4	0.578157	0.657174	0.73649	0.779026	0.845899	0.826395	0.894383	0.979097
11.5	0.586079	0.658075	0.741383	0.783512	0.844342	0.830033	0.899574	0.982909
11.6	0.585828	0.658721	0.740788	0.782533	0.844541	0.830817	0.905673	0.977849
11.7	0.587141	0.661802	0.739502	0.785596	0.843744	0.832268	0.897591	0.98535
11.8	0.589328	0.666192	0.747217	0.787693	0.848574	0.829809	0.898832	0.987241
11.9	0.59313	0.665109	0.744542	0.792778	0.845122	0.829916	0.897917	0.983449
12	0.595839	0.664882	0.748393	0.785252	0.857104	0.833471	0.897745	0.987341
12.1	0.592102	0.664573	0.746588	0.791894	0.851789	0.831143	0.901005	0.986801
12.2	0.597507	0.670913	0.752773	0.790024	0.850665	0.832494	0.905285	0.990827
12.3	0.598916	0.671146	0.750067	0.793847	0.854553	0.836654	0.909283	0.983704
12.4	0.605191	0.671452	0.7516	0.791571	0.852834	0.838566	0.905643	0.983607
12.5	0.601529	0.678755	0.749428	0.79142	0.855925	0.845157	0.908307	0.992202
12.6	0.605091	0.674052	0.755042	0.791963	0.857352	0.841698	0.912471	0.990535
12.7	0.606277	0.677277	0.753048	0.794012	0.857273	0.838006	0.913072	0.992247
12.8	0.607542	0.677442	0.755564	0.795979	0.859459	0.843795	0.912467	0.990184
12.9	0.61523	0.680446	0.761557	0.793892	0.863124	0.843775	0.910727	0.991566
13	0.610729	0.682124	0.755905	0.797536	0.862392	0.842712	0.914489	0.984818
13.1	0.61316	0.686453	0.759291	0.79798	0.864589	0.848444	0.908651	0.990872
13.2	0.616578	0.683726	0.760825	0.800957	0.859772	0.846006	0.910917	0.992777
13.3	0.614989	0.684823	0.763861	0.795807	0.860724	0.847044	0.912704	0.987984
13.4	0.616959	0.690059	0.76122	0.801301	0.862777	0.842891	0.913237	0.991941
13.5	0.616942	0.690049	0.761523	0.798571	0.862014	0.840907	0.916029	0.995396
13.6	0.621229	0.686295	0.76308	0.800125	0.863743	0.846756	0.913698	0.992636
13.7	0.621632	0.688966	0.76746	0.8027	0.867367	0.847013	0.913701	0.997796
13.8	0.625327	0.696358	0.765566	0.798509	0.868941	0.847065	0.912715	0.99791
13.9	0.626304	0.697396	0.76777	0.803536	0.867432	0.846391	0.913873	0.99673
14	0.628387	0.695454	0.767048	0.801693	0.867552	0.845346	0.916328	0.99912
14.1	0.629732	0.695505	0.769028	0.806468	0.867955	0.851627	0.911776	0.997005
14.2	0.632035	0.698201	0.771215	0.805629	0.868415	0.846446	0.915441	0.993698
14.3	0.632465	0.69905	0.775024	0.804677	0.870932	0.849186	0.91761	0.994743
14.4	0.634669	0.695343	0.771245	0.802955	0.87338	0.85237	0.915561	0.998529
14.5	0.634074	0.699648	0.774158	0.810498	0.868883	0.849891	0.914568	0.998728
14.6	0.633985	0.69918	0.776059	0.810921	0.871269	0.845367	0.919354	1
14.7	0.638182	0.702536	0.771311	0.807685	0.873211	0.846742	0.916758	0.995658
14.8	0.637997	0.704018	0.777427	0.808421	0.869619	0.847319	0.918772	0.993925
14.9	0.641847	0.703103	0.772163	0.811605	0.866328	0.851407	0.921275	0.991869
15	0.641163	0.708271	0.771545	0.811213	0.870224	0.84613	0.918085	0.995754
15.1	0.638134	0.708137	0.779913	0.810656	0.870884	0.849214	0.920254	0.999684
15.2	0.644065	0.709264	0.772542	0.812011	0.873349	0.848251	0.917136	0.98951
15.3	0.64817	0.708817	0.774769	0.806695	0.867415	0.853522	0.919673	0.992343
15.4	0.644787	0.70159	0.774398	0.810883	0.877567	0.849186	0.922379	0.997676
15.5	0.643749	0.706342	0.777362	0.81331	0.869495	0.849654	0.917102	0.995634
15.6	0.648644	0.711341	0.774068	0.812478	0.874298	0.84473	0.917744	0.992062
15.7	0.647149	0.70738	0.778582	0.811557	0.869945	0.850905	0.917277	0.992577
15.8	0.65081	0.709711	0.779029	0.811622	0.873466	0.850592	0.915173	0.993244
15.9	0.648538	0.711949	0.778517	0.813616	0.875333	0.8479	0.917373	0.994066
16	0.655631	0.711619	0.781047	0.813926	0.875838	0.855815	0.919041	0.991384
16.1	0.6508	0.711416	0.778624	0.811863	0.870598	0.842324	0.915493	0.996039
16.2	0.652072	0.711279	0.780707	0.811137	0.875645	0.84657	0.918521	0.993495
16.3	0.65221	0.714397	0.782051	0.815225	0.875343	0.846267	0.916452	0.997291
16.4	0.656325	0.716804	0.778225	0.815308	0.871901	0.850833	0.919278	0.992777
16.5	0.654217	0.717179	0.779108	0.815232	0.875955	0.851992	0.917645	0.990834
16.6	0.6544	0.715845	0.78244	0.812946	0.871895	0.846446	0.918838	0.986416
16.7	0.654059	0.71557	0.779418	0.815094	0.874356	0.844143	0.913963	0.993131
16.8	0.656377	0.714538	0.78322	0.813386	0.871214	0.847165	0.914619	0.993024
16.9	0.662331	0.716883	0.785149	0.813595	0.871922	0.846374	0.916655	0.990243
17	0.660293	0.713617	0.78201	0.815624	0.872593	0.846247	0.915125	0.987671
17.1	0.658749	0.716515	0.781821	0.815803	0.870653	0.852215	0.917239	0.988073
17.2	0.657896	0.717426	0.781783	0.815235	0.870726	0.850861	0.912887	0.990889
17.3	0.657105	0.718334	0.777877	0.813929	0.87087	0.847601	0.917762	0.98642
17.4	0.66129	0.715229	0.786332	0.81047	0.879345	0.849248	0.913839	0.992997
17.5	0.662077	0.717626	0.786125	0.811161	0.875202	0.849327	0.915114	0.989882
17.6	0.664435	0.721892	0.782763	0.811983	0.872788	0.847285	0.917335	0.991181
17.7	0.662847	0.717722	0.78244	0.813977	0.875652	0.853027	0.917923	0.990666
17.8	0.662472	0.722679	0.784575	0.815483	0.874566	0.844435	0.914609	0.981603
17.9	0.665952	0.721132	0.780123	0.811852	0.870358	0.844861	0.912261	0.980792
18	0.667052	0.721466	0.786167	0.813193	0.870585	0.847323	0.91562	0.98413
18.1	0.662355	0.721707	0.783674	0.816961	0.878551	0.842946	0.912948	0.985371
18.2	0.661482	0.724323	0.779514	0.809219	0.873277	0.847216	0.91126	0.984092
18.3	0.665371	0.724691	0.782756	0.811099	0.874624	0.845153	0.913887	0.983298
18.4	0.663854	0.720813	0.787195	0.814988	0.869615	0.8411	0.905997	0.979471
18.5	0.667172	0.723718	0.782533	0.814293	0.865376	0.844944	0.911302	0.983776
18.6	0.666447	0.723305	0.784434	0.816219	0.870416	0.840113	0.909242	0.98205
18.7	0.667169	0.723673	0.789278	0.812946	0.869935	0.845054	0.908551	0.979506
18.8	0.671862	0.722205	0.780587	0.813104	0.868632	0.845834	0.908506	0.975645
18.9	0.669022	0.720768	0.784076	0.819622	0.868828	0.841244	0.907052	0.977539
19	0.666663	0.725643	0.784939	0.816305	0.868013	0.845202	0.908121	0.978302
19.1	0.666632	0.719802	0.784864	0.816724	0.86682	0.835417	0.908307	0.977745
19.2	0.665446	0.726049	0.78585	0.812488	0.870798	0.840842	0.908056	0.974562
19.3	0.668087	0.726602	0.781591	0.809759	0.867459	0.845257	0.908393	0.977604
19.4	0.670349	0.721861	0.781078	0.80981	0.868054	0.840739	0.906646	0.970807
19.5	0.671827	0.724622	0.781305	0.814345	0.871888	0.839291	0.906591	0.972465
19.6	0.672559	0.72314	0.78212	0.81058	0.866555	0.841509	0.903208	0.975775
19.7	0.677032	0.724794	0.782502	0.810797	0.866277	0.840278	0.906746	0.971471
19.8	0.670029	0.728249	0.777712	0.810886	0.866707	0.839656	0.903934	0.97363
19.9	0.676572	0.72258	0.780123	0.812684	0.860215	0.837621	0.907619	0.970354
20	0.670803	0.724027	0.784956	0.806131	0.86694	0.835011	0.908073	0.972581
20.1	0.670906	0.725165	0.77938	0.80806	0.865359	0.838649	0.902246	0.972128
20.2	0.672783	0.723092	0.777303	0.808552	0.863839	0.833058	0.904116	0.967208
20.3	0.670015	0.724364	0.783213	0.809202	0.864726	0.837239	0.908149	0.969559
20.4	0.675578	0.722202	0.780054	0.804337	0.861666	0.836008	0.896222	0.966627
20.5	0.66819	0.724082	0.780026	0.808861	0.863767	0.8351	0.90272	0.967215
20.6	0.676066	0.719788	0.779896	0.810862	0.866748	0.836861	0.901297	0.970147
20.7	0.673873	0.720496	0.780126	0.808707	0.859906	0.833732	0.908001	0.967438
20.8	0.672663	0.722975	0.778885	0.806843	0.865352	0.834599	0.901744	0.963849
20.9	0.676465	0.72193	0.775533	0.80258	0.861127	0.831226	0.898364	0.964712
21	0.673608	0.722322	0.781707	0.806647	0.862371	0.833839	0.89657	0.964368
21.1	0.675578	0.72358	0.776994	0.802845	0.863595	0.832862	0.901641	0.959603
21.2	0.67607	0.720012	0.779737	0.803491	0.86277	0.829716	0.901293	0.958836
21.3	0.677053	0.723319	0.77467	0.805918	0.862849	0.832522	0.895504	0.964426
21.4	0.672126	0.719963	0.773896	0.805877	0.857826	0.829895	0.894376	0.957083
21.5	0.678483	0.723147	0.78081	0.803161	0.857854	0.832347	0.896583	0.959015
21.6	0.671628	0.72096	0.783196	0.805612	0.858706	0.829115	0.892647	0.955862
21.7	0.670748	0.72312	0.777836	0.804323	0.859253	0.828204	0.896301	0.954387
21.8	0.676073	0.719637	0.779074	0.801208	0.860511	0.828603	0.892382	0.957867
21.9	0.671948	0.719647	0.775426	0.798667	0.857805	0.827055	0.891505	0.952778
22	0.672807	0.720077	0.774577	0.80028	0.862058	0.827795	0.890041	0.9502
22.1	0.674818	0.718722	0.77502	0.800421	0.85302	0.829166	0.892344	0.953273
22.2	0.672016	0.717357	0.771741	0.80159	0.854952	0.82884	0.888284	0.954903
22.3	0.676678	0.721514	0.777977	0.79821	0.85403	0.830586	0.893602	0.951156
22.4	0.675186	0.717127	0.774684	0.801604	0.852586	0.829215	0.885747	0.953108
22.5	0.67915	0.721397	0.773432	0.799252	0.858596	0.825546	0.889924	0.951296
22.6	0.673911	0.719616	0.773631	0.7947	0.850909	0.824628	0.890484	0.951802
22.7	0.674227	0.719874	0.770073	0.796202	0.855615	0.823222	0.891533	0.944589
22.8	0.682076	0.721414	0.774219	0.799468	0.850589	0.823019	0.889363	0.949271
22.9	0.679322	0.719355	0.770675	0.798581	0.848107	0.821971	0.886517	0.945978
23	0.676108	0.718454	0.772961	0.797866	0.851558	0.823012	0.888806	0.948969
23.1	0.677194	0.718977	0.771957	0.797605	0.850792	0.820293	0.887961	0.954074
23.2	0.675767	0.720462	0.769606	0.796443	0.845463	0.82063	0.882106	0.947044
23.3	0.672807	0.71931	0.77479	0.795611	0.85293	0.821565	0.885128	0.945912
23.4	0.673962	0.719331	0.771043	0.798691	0.848935	0.817811	0.885272	0.944984
23.5	0.672659	0.717368	0.773243	0.792214	0.847261	0.818096	0.878159	0.941711
23.6	0.673213	0.719087	0.766563	0.792424	0.848426	0.816332	0.878877	0.940219
23.7	0.678456	0.719922	0.769764	0.791846	0.847753	0.820637	0.88312	0.936736
23.8	0.675946	0.716206	0.766996	0.794985	0.847904	0.812695	0.878681	0.93895
23.9	0.67806	0.715552	0.76766	0.789883	0.842001	0.812966	0.874432	0.935444
24	0.672958	0.713122	0.764249	0.790509	0.844198	0.812127	0.880799	0.937338
24.1	0.67661	0.711925	0.770231	0.791238	0.845951	0.812083	0.876677	0.935726
24.2	0.678703	0.711073	0.763434	0.784087	0.842076	0.814304	0.872854	0.934625
24.3	0.675685	0.713596	0.763149	0.787332	0.843094	0.814297	0.872885	0.937231
24.4	0.675279	0.716601	0.764723	0.790911	0.844263	0.811581	0.870317	0.931947
24.5	0.675967	0.713287	0.760801	0.786387	0.840904	0.813499	0.871063	0.936093
24.6	0.674134	0.712664	0.763276	0.786885	0.840361	0.808813	0.874229	0.933023
24.7	0.676324	0.716794	0.764686	0.792806	0.838085	0.805189	0.871953	0.937922
24.8	0.674825	0.707782	0.764056	0.789897	0.837971	0.812409	0.87689	0.933271
24.9	0.675963	0.71251	0.76679	0.786088	0.837143	0.807875	0.874253	0.933487
25	0.676334	0.710959	0.758556	0.780618	0.836599	0.802398	0.867226	0.932583
25.1	0.671851	0.713321	0.766546	0.78016	0.840154	0.805213	0.867411	0.932287
25.2	0.67421	0.713723	0.758466	0.7832	0.841812	0.808548	0.865472	0.928045
25.3	0.676142	0.710313	0.765002	0.781463	0.834385	0.807218	0.873356	0.926776
25.4	0.677342	0.711355	0.761227	0.783382	0.83912	0.802057	0.865912	0.927577
25.5	0.671432	0.708549	0.763365	0.782141	0.833241	0.802924	0.86749	0.921712
25.6	0.671226	0.710543	0.758284	0.778063	0.829029	0.804192	0.865098	0.916978
25.7	0.675695	0.708559	0.758312	0.780305	0.840388	0.800661	0.865699	0.923166
25.8	0.672563	0.707978	0.757129	0.778957	0.831834	0.80608	0.860429	0.91671
25.9	0.676726	0.701745	0.754392	0.779758	0.82906	0.801397	0.866445	0.91968
26	0.675303	0.707397	0.758342	0.780023	0.83191	0.801982	0.866239	0.920794
26.1	0.67355	0.70736	0.755922	0.776186	0.830648	0.794858	0.862186	0.922338
26.2	0.675874	0.707837	0.757926	0.773415	0.827107	0.802879	0.865483	0.913347
26.3	0.673612	0.704104	0.755475	0.778373	0.834358	0.800466	0.853023	0.913344
26.4	0.67071	0.705304	0.754258	0.778111	0.825594	0.794886	0.85872	0.916452
26.5	0.675461	0.703939	0.753698	0.774536	0.824852	0.791207	0.858383	0.911367
26.6	0.67181	0.70583	0.755743	0.775553	0.827554	0.79405	0.861556	0.915455
26.7	0.673405	0.704179	0.753887	0.772679	0.827282	0.800328	0.85685	0.913643
26.8	0.670246	0.708432	0.749809	0.775234	0.822534	0.791427	0.859026	0.916514
26.9	0.672147	0.707047	0.750139	0.775632	0.824542	0.791688	0.853381	0.90961
27	0.669988	0.697984	0.753519	0.771926	0.825563	0.792042	0.853319	0.908372
27.1	0.672927	0.706583	0.74787	0.771084	0.825453	0.795181	0.856241	0.907334
27.2	0.668809	0.701573	0.749407	0.774656	0.821524	0.79318	0.854261	0.908472
27.3	0.67017	0.704313	0.747691	0.771514	0.825501	0.789801	0.853006	0.90829
27.4	0.670094	0.703124	0.746522	0.764442	0.819354	0.787528	0.849564	0.9082
27.5	0.672498	0.703942	0.744274	0.7655	0.822263	0.785744	0.855175	0.905326
27.6	0.671353	0.699301	0.745295	0.768712	0.819839	0.785462	0.849434	0.908097
27.7	0.670614	0.702457	0.747488	0.76604	0.814441	0.788597	0.852043	0.901496
27.8	0.669256	0.704324	0.743098	0.764706	0.820513	0.786318	0.847863	0.904962
27.9	0.665721	0.700951	0.751119	0.766546	0.814486	0.783478	0.848069	0.905973
28	0.671198	0.701742	0.747774	0.765844	0.814878	0.781663	0.843579	0.904876
28.1	0.663596	0.705964	0.748912	0.765318	0.815669	0.785077	0.844053	0.896349
28.2	0.663937	0.700556	0.742679	0.763692	0.814049	0.781171	0.841818	0.90261
28.3	0.665652	0.700088	0.746436	0.762107	0.81603	0.78244	0.847031	0.900788
28.4	0.663411	0.699675	0.744937	0.759422	0.812794	0.780353	0.83991	0.899956
28.5	0.667402	0.698524	0.742637	0.762888	0.812413	0.782062	0.83924	0.89484
28.6	0.666165	0.697633	0.740767	0.759456	0.80883	0.776516	0.839701	0.892819
28.7	0.665556	0.692579	0.740795	0.761729	0.811467	0.783004	0.838769	0.892719
28.8	0.663899	0.696344	0.743335	0.759305	0.809487	0.782254	0.840134	0.894132
28.9	0.665109	0.695594	0.739973	0.757321	0.811368	0.775089	0.842657	0.889762
29	0.670373	0.692892	0.739495	0.76001	0.808328	0.776568	0.83783	0.890914
29.1	0.660832	0.696942	0.741884	0.759257	0.805076	0.778548	0.834935	0.891113
29.2	0.666368	0.692507	0.738945	0.760422	0.809095	0.775185	0.840787	0.890794
29.3	0.665542	0.693329	0.73998	0.752711	0.80982	0.773209	0.833935	0.884732
29.4	0.660925	0.691407	0.737975	0.751783	0.80336	0.777011	0.833045	0.886513
29.5	0.664191	0.694924	0.734403	0.755197	0.804474	0.769265	0.827936	0.8829
29.6	0.66329	0.692198	0.73724	0.755644	0.800355	0.773858	0.834468	0.885214
29.7	0.663762	0.69237	0.73342	0.75564	0.806499	0.770802	0.830989	0.886926
29.8	0.665663	0.692456	0.731914	0.752928	0.799544	0.773226	0.827578	0.885458
29.9	0.660794	0.686858	0.732681	0.749098	0.800954	0.772435	0.836115	0.880703

## Sheet: DDL n=2
x correct	19	18.1333	17.2667	16.4	15.5333	14.6667	13.8	12.9333
time	100	169.381	286.901	485.956	823.119	1394.21	2361.53	4000
0	0.00406551	0.00498278	0.00653888	0.00878949	0.010054	0.0108435	0.0142244	0.0216707
0.1	0.00505486	0.00598851	0.00842913	0.0109877	0.0132285	0.0154856	0.0188173	0.0283406
0.2	0.00589351	0.007846	0.0114103	0.0156363	0.0184963	0.0207763	0.0260179	0.03885
0.3	0.00646353	0.0102342	0.014968	0.0210024	0.0248255	0.0274626	0.0347091	0.0495658
0.4	0.00864534	0.0130024	0.0194922	0.0279573	0.0344209	0.0361866	0.0447239	0.0622111
0.5	0.0104897	0.0163079	0.0252972	0.0356854	0.0438164	0.046352	0.0562979	0.0764322
0.6	0.0130647	0.019846	0.0316657	0.0439704	0.0537787	0.0583356	0.069818	0.0939456
0.7	0.0152137	0.0246649	0.0380507	0.0537492	0.0651693	0.0698343	0.0824207	0.110794
0.8	0.0173267	0.0280785	0.0445633	0.0637312	0.0784993	0.0826566	0.0972151	0.12852
0.9	0.0204651	0.0329925	0.0519671	0.0729367	0.0914428	0.0972413	0.112691	0.146155
1	0.0237215	0.0394692	0.0600588	0.0834592	0.104072	0.110804	0.12683	0.167764
1.1	0.0262997	0.0438066	0.0701226	0.0942241	0.11712	0.125719	0.142764	0.186859
1.2	0.0304307	0.0506894	0.0767598	0.106106	0.131108	0.140461	0.159911	0.207649
1.3	0.033461	0.0571464	0.0867024	0.117972	0.145615	0.155662	0.177411	0.226391
1.4	0.0391154	0.0621914	0.0963273	0.131639	0.159682	0.168933	0.189103	0.247036
1.5	0.0423651	0.0702078	0.105608	0.141772	0.172022	0.185768	0.208599	0.271033
1.6	0.0475314	0.0764682	0.115351	0.156396	0.188691	0.199138	0.224248	0.290302
1.7	0.0496542	0.0825517	0.125425	0.168383	0.206057	0.214211	0.23899	0.311436
1.8	0.0554888	0.0910693	0.136268	0.180311	0.220543	0.227983	0.259383	0.328343
1.9	0.0612119	0.0972675	0.144022	0.192294	0.234204	0.244684	0.273011	0.349709
2	0.0664633	0.103	0.157408	0.203783	0.249732	0.259282	0.286584	0.370276
2.1	0.0710858	0.112593	0.164832	0.214846	0.264464	0.27366	0.30433	0.386413
2.2	0.0759637	0.118365	0.17557	0.231174	0.27537	0.288661	0.316625	0.405971
2.3	0.0802028	0.127836	0.185618	0.240314	0.289162	0.303881	0.332798	0.421283
2.4	0.0857622	0.13446	0.19598	0.252527	0.30335	0.316117	0.345794	0.441221
2.5	0.0908465	0.141189	0.206001	0.262535	0.31364	0.32908	0.361719	0.459556
2.6	0.0952659	0.149277	0.215485	0.273706	0.324277	0.340867	0.371484	0.468919
2.7	0.102247	0.156317	0.227786	0.283753	0.340179	0.353883	0.384048	0.485453
2.8	0.107734	0.163885	0.23841	0.29634	0.353008	0.365155	0.399697	0.502036
2.9	0.112887	0.171724	0.243531	0.307357	0.364916	0.376608	0.409748	0.515821
3	0.117998	0.179764	0.254345	0.31384	0.375403	0.389034	0.422043	0.523425
3.1	0.124632	0.186027	0.260366	0.324517	0.385702	0.401014	0.432022	0.540231
3.2	0.129507	0.193323	0.272097	0.336392	0.396402	0.411117	0.447281	0.553761
3.3	0.135466	0.201729	0.281919	0.347622	0.407045	0.425456	0.454855	0.567376
3.4	0.141244	0.20873	0.290187	0.354878	0.418249	0.4321	0.4683	0.576653
3.5	0.146601	0.213454	0.298515	0.36852	0.428159	0.441345	0.477813	0.592299
3.6	0.152599	0.224199	0.308861	0.373912	0.43894	0.452487	0.484329	0.600142
3.7	0.160281	0.229408	0.317054	0.379786	0.447166	0.462711	0.494806	0.611317
3.8	0.165919	0.237306	0.323465	0.389866	0.460519	0.472709	0.506072	0.62387
3.9	0.169578	0.243229	0.334354	0.399412	0.465954	0.478301	0.51553	0.635683
4	0.175832	0.251858	0.339675	0.409656	0.475101	0.488382	0.524624	0.642366
4.1	0.181873	0.259409	0.349368	0.416045	0.485387	0.495854	0.530419	0.650285
4.2	0.187446	0.265146	0.358328	0.423864	0.494524	0.502118	0.538986	0.661341
4.3	0.193562	0.272717	0.364195	0.430023	0.498845	0.510685	0.548064	0.672843
4.4	0.197647	0.278725	0.371576	0.436343	0.506724	0.521312	0.55477	0.682212
4.5	0.20608	0.286446	0.378855	0.446924	0.518649	0.528201	0.567349	0.6896
4.6	0.210663	0.291865	0.385555	0.454646	0.523549	0.53455	0.571389	0.701085
4.7	0.214879	0.297847	0.395199	0.461679	0.528028	0.540074	0.577482	0.705193
4.8	0.222306	0.302332	0.39976	0.467917	0.53646	0.548165	0.588378	0.71703
4.9	0.225005	0.311675	0.407812	0.473689	0.544395	0.556267	0.593377	0.723415
5	0.231311	0.31633	0.412687	0.481423	0.552211	0.561109	0.59891	0.729315
5.1	0.237382	0.320254	0.420991	0.48431	0.561102	0.56901	0.606511	0.740338
5.2	0.241428	0.330426	0.423448	0.489944	0.565849	0.576132	0.613859	0.744964
5.3	0.248163	0.337182	0.433355	0.495366	0.5732	0.582095	0.617184	0.751274
5.4	0.253676	0.341647	0.434144	0.502318	0.57305	0.592833	0.626111	0.759342
5.5	0.25859	0.346286	0.443219	0.509269	0.582026	0.592951	0.63129	0.76712
5.6	0.265074	0.350554	0.454626	0.513676	0.58808	0.601138	0.638311	0.770648
5.7	0.269447	0.361113	0.455275	0.519356	0.593901	0.606403	0.644863	0.779129
5.8	0.276432	0.363674	0.460785	0.524739	0.599759	0.614815	0.650632	0.783978
5.9	0.28054	0.368621	0.466888	0.529803	0.60694	0.617456	0.653534	0.790006
6	0.284658	0.375055	0.472795	0.534842	0.606865	0.621184	0.660289	0.798399
6.1	0.289604	0.381011	0.478433	0.539566	0.612745	0.629931	0.66884	0.805082
6.2	0.293368	0.386744	0.482704	0.548336	0.619054	0.631552	0.667981	0.808381
6.3	0.298911	0.388441	0.485659	0.549413	0.623028	0.639244	0.677538	0.813403
6.4	0.303911	0.393283	0.49173	0.556784	0.630406	0.639913	0.679175	0.819978
6.5	0.309132	0.400775	0.496909	0.559032	0.630088	0.646717	0.688617	0.821763
6.6	0.316513	0.406397	0.499844	0.564562	0.638127	0.656715	0.688332	0.827781
6.7	0.320189	0.409604	0.50238	0.567408	0.639608	0.658586	0.697888	0.832951
6.8	0.323354	0.413735	0.512716	0.571274	0.646049	0.661115	0.69893	0.837098
6.9	0.328772	0.419121	0.515504	0.578422	0.649996	0.663932	0.702723	0.836115
7	0.331865	0.423972	0.519448	0.580712	0.655411	0.67188	0.709917	0.842051
7.1	0.336792	0.426223	0.523507	0.584159	0.660591	0.675228	0.716007	0.847702
7.2	0.342387	0.434495	0.528542	0.585823	0.660535	0.675936	0.714347	0.852495
7.3	0.346892	0.437194	0.530213	0.594835	0.66885	0.683827	0.717338	0.856875
7.4	0.351914	0.434878	0.537784	0.594776	0.672981	0.68692	0.724129	0.858303
7.5	0.354295	0.446459	0.543277	0.600028	0.677023	0.686563	0.728813	0.866716
7.6	0.357316	0.447373	0.545142	0.602154	0.679772	0.691972	0.733275	0.870074
7.7	0.361997	0.451071	0.54712	0.608997	0.684895	0.697744	0.734808	0.873737
7.8	0.367324	0.456051	0.553597	0.61513	0.683719	0.698772	0.739713	0.882474
7.9	0.372657	0.459189	0.55286	0.616316	0.684709	0.703385	0.737465	0.882529
8	0.374636	0.462573	0.564224	0.618386	0.695487	0.707657	0.746992	0.891247
8.1	0.376513	0.4679	0.565967	0.626019	0.697793	0.709049	0.7494	0.890392
8.2	0.382656	0.469535	0.561584	0.623474	0.697878	0.714995	0.75014	0.894218
8.3	0.387448	0.472608	0.566252	0.62428	0.70693	0.714573	0.75816	0.897792
8.4	0.392621	0.477679	0.570842	0.633174	0.705842	0.721898	0.754268	0.907565
8.5	0.395363	0.482154	0.57875	0.63626	0.709741	0.723297	0.761488	0.910451
8.6	0.402049	0.487825	0.580064	0.637597	0.710874	0.726884	0.764934	0.909717
8.7	0.399635	0.490842	0.582665	0.637013	0.716689	0.727372	0.766481	0.912947
8.8	0.407173	0.492228	0.582933	0.645885	0.714543	0.730022	0.770412	0.925081
8.9	0.407016	0.493233	0.588522	0.648037	0.722019	0.735778	0.76978	0.922051
9	0.413522	0.498645	0.591297	0.651346	0.720833	0.73987	0.777861	0.92286
9.1	0.417332	0.499392	0.594753	0.65109	0.723339	0.740011	0.783296	0.928937
9.2	0.416981	0.504254	0.59875	0.653996	0.727477	0.744453	0.783051	0.931748
9.3	0.423494	0.509738	0.598727	0.657069	0.737704	0.747536	0.78478	0.933714
9.4	0.423802	0.510324	0.598154	0.660204	0.732515	0.74651	0.784076	0.934483
9.5	0.431645	0.51476	0.60578	0.665502	0.736604	0.751919	0.792911	0.936043
9.6	0.431091	0.513676	0.610131	0.666913	0.73813	0.755781	0.78614	0.940973
9.7	0.435301	0.521282	0.610534	0.673551	0.741704	0.753265	0.792505	0.94593
9.8	0.43727	0.523487	0.61302	0.673862	0.746504	0.760305	0.794929	0.949736
9.9	0.438744	0.52484	0.614959	0.676941	0.743791	0.762402	0.793534	0.947008
10	0.441325	0.527612	0.618753	0.680866	0.747067	0.758916	0.802392	0.95354
10.1	0.446868	0.529558	0.620516	0.678547	0.751018	0.765547	0.801432	0.954565
10.2	0.449257	0.53569	0.621849	0.683657	0.756482	0.766074	0.80421	0.954628
10.3	0.454433	0.537099	0.623317	0.68959	0.754196	0.76997	0.804666	0.956442
10.4	0.455153	0.535805	0.628561	0.690818	0.759509	0.767454	0.802618	0.958673
10.5	0.457263	0.541086	0.626462	0.697429	0.757514	0.768476	0.807997	0.959388
10.6	0.459104	0.541384	0.635195	0.694501	0.766717	0.7745	0.809203	0.960914
10.7	0.4643	0.543625	0.634137	0.694242	0.76441	0.774739	0.814566	0.964924
10.8	0.46467	0.5435	0.635998	0.696201	0.766032	0.776862	0.818847	0.963466
10.9	0.464749	0.546884	0.639438	0.707267	0.767916	0.776319	0.811798	0.963102
11	0.468267	0.549151	0.641652	0.704751	0.771198	0.780882	0.820004	0.964478
11.1	0.470111	0.556732	0.639113	0.701878	0.774166	0.783172	0.816518	0.96933
11.2	0.475101	0.557446	0.642583	0.709429	0.774677	0.782926	0.825154	0.969517
11.3	0.475347	0.559762	0.642891	0.711146	0.774907	0.783195	0.825868	0.975571
11.4	0.480297	0.561459	0.645367	0.710913	0.779247	0.783974	0.824292	0.974116
11.5	0.484889	0.561911	0.648932	0.713334	0.77719	0.787047	0.827529	0.972102
11.6	0.484932	0.563179	0.653469	0.710487	0.785645	0.784777	0.82843	0.973867
11.7	0.489561	0.567019	0.655077	0.717482	0.784125	0.787768	0.82424	0.976514
11.8	0.485574	0.57172	0.656473	0.719215	0.784505	0.796587	0.82956	0.980033
11.9	0.490134	0.572129	0.657433	0.718615	0.785822	0.793436	0.827866	0.979332
12	0.49151	0.574992	0.6629	0.721763	0.787087	0.795378	0.830232	0.979587
12.1	0.493889	0.572444	0.664355	0.718605	0.790644	0.794818	0.836105	0.982627
12.2	0.502446	0.574861	0.662877	0.72102	0.787277	0.795303	0.833245	0.980167
12.3	0.502239	0.582334	0.664162	0.728584	0.790176	0.796947	0.84039	0.985245
12.4	0.503589	0.580709	0.667244	0.729999	0.790196	0.799837	0.840816	0.982732
12.5	0.506069	0.584768	0.667824	0.733655	0.79088	0.800377	0.840328	0.991761
12.6	0.508447	0.582737	0.672116	0.727863	0.793488	0.801662	0.836839	0.991915
12.7	0.510563	0.587189	0.674252	0.73208	0.796197	0.801835	0.837046	0.992636
12.8	0.512536	0.58638	0.678049	0.735798	0.797757	0.805413	0.840908	0.988056
12.9	0.509676	0.587992	0.680352	0.734402	0.797734	0.806425	0.841619	0.99179
13	0.511399	0.589731	0.678324	0.741845	0.800119	0.80387	0.841639	0.989749
13.1	0.512771	0.590239	0.681574	0.74005	0.797639	0.806929	0.843224	0.984731
13.2	0.514865	0.592594	0.683785	0.73798	0.796633	0.807811	0.842127	0.994385
13.3	0.521797	0.59722	0.681351	0.740211	0.801816	0.804689	0.842058	0.994025
13.4	0.520863	0.601007	0.683657	0.743857	0.802602	0.811663	0.849393	0.991879
13.5	0.521436	0.596637	0.689131	0.74387	0.804603	0.808685	0.844764	0.98838
13.6	0.524565	0.600221	0.685266	0.742674	0.805455	0.807227	0.849265	0.983076
13.7	0.527097	0.602704	0.684194	0.742487	0.807381	0.810536	0.848793	0.994886
13.8	0.527684	0.602091	0.690773	0.747143	0.808485	0.809147	0.851512	0.989726
13.9	0.534367	0.60181	0.696427	0.748735	0.807034	0.811565	0.849517	0.990097
14	0.529119	0.606979	0.691772	0.750107	0.805973	0.815398	0.851493	0.988717
14.1	0.536044	0.604037	0.696401	0.751172	0.807499	0.812633	0.849563	0.994106
14.2	0.535012	0.607946	0.694239	0.751942	0.80325	0.811155	0.847958	0.990277
14.3	0.537522	0.61074	0.694861	0.751618	0.810562	0.813514	0.850048	0.990352
14.4	0.54048	0.604607	0.697705	0.748355	0.811129	0.811155	0.846159	0.98631
14.5	0.539857	0.611104	0.693465	0.750903	0.813589	0.812436	0.850716	0.996121
14.6	0.54104	0.618036	0.696597	0.755765	0.819634	0.817069	0.848885	0.989854
14.7	0.54216	0.613534	0.694206	0.758032	0.81508	0.809868	0.853707	0.990719
14.8	0.543029	0.61607	0.697872	0.755758	0.810153	0.810703	0.853196	0.995715
14.9	0.547471	0.616624	0.697708	0.752453	0.814756	0.814972	0.845891	0.990378
15	0.547756	0.619202	0.700433	0.756253	0.81356	0.810854	0.852197	0.99579
15.1	0.549001	0.616329	0.705125	0.761167	0.816096	0.814906	0.855188	0.995518
15.2	0.547687	0.621495	0.698854	0.754982	0.81792	0.8149	0.853635	0.992242
15.3	0.546829	0.620984	0.708171	0.762323	0.806451	0.812279	0.852977	0.994241
15.4	0.549233	0.622154	0.705098	0.762006	0.813917	0.812613	0.852702	0.991076
15.5	0.553682	0.617181	0.704322	0.758605	0.813527	0.815725	0.854438	0.990188
15.6	0.551739	0.621888	0.702442	0.763057	0.817567	0.815896	0.854706	0.994143
15.7	0.552965	0.627703	0.700807	0.76328	0.812571	0.81034	0.851562	0.991227
15.8	0.555169	0.623595	0.703192	0.760384	0.815201	0.81148	0.853376	0.992167
15.9	0.555582	0.626953	0.705616	0.762278	0.81128	0.812066	0.856023	0.994228
16	0.556385	0.623464	0.708646	0.765115	0.815837	0.812885	0.854589	0.995538
16.1	0.558072	0.626173	0.702635	0.762982	0.819188	0.818625	0.852033	0.993602
16.2	0.558734	0.628673	0.708646	0.759464	0.817092	0.814186	0.854209	0.992832
16.3	0.557816	0.628794	0.7067	0.761337	0.816777	0.813134	0.852371	0.997317
16.4	0.560028	0.628407	0.706769	0.764309	0.811909	0.816141	0.852859	0.995597
16.5	0.560798	0.628119	0.708843	0.761318	0.812443	0.81337	0.856833	0.998981
16.6	0.562753	0.629489	0.709888	0.759444	0.816813	0.81355	0.854837	0.997494
16.7	0.559415	0.630819	0.708106	0.760718	0.81776	0.819696	0.85753	1
16.8	0.56255	0.632221	0.710098	0.765639	0.82005	0.817324	0.850176	0.999427
16.9	0.569829	0.634874	0.711051	0.76691	0.818232	0.819781	0.852037	0.990624
17	0.565046	0.635497	0.714235	0.764882	0.818399	0.818448	0.859185	0.999541
17.1	0.568358	0.634753	0.712047	0.76404	0.815565	0.820597	0.856322	0.997835
17.2	0.567336	0.636122	0.716512	0.769465	0.822074	0.817504	0.852145	0.996731
17.3	0.568657	0.631392	0.711929	0.764486	0.817393	0.81968	0.857337	0.991912
17.4	0.569328	0.635814	0.711713	0.767228	0.81641	0.812712	0.852682	0.994729
17.5	0.567579	0.638982	0.715454	0.771093	0.817632	0.813439	0.853887	0.994614
17.6	0.569354	0.635421	0.715041	0.762785	0.812879	0.82059	0.854159	0.999876
17.7	0.572214	0.633705	0.715028	0.769629	0.814022	0.813262	0.856823	0.997687
17.8	0.571078	0.638029	0.714412	0.768518	0.826327	0.821763	0.856607	0.994044
17.9	0.572155	0.642786	0.715834	0.766664	0.819077	0.819834	0.856937	0.9966
18	0.573482	0.638416	0.710668	0.76957	0.815883	0.818464	0.849229	0.99027
18.1	0.570458	0.638065	0.715935	0.770301	0.819657	0.821557	0.852482	0.992174
18.2	0.574186	0.638524	0.715926	0.769334	0.817075	0.821979	0.852014	0.996216
18.3	0.572866	0.641593	0.712689	0.768843	0.81527	0.822474	0.85449	0.99543
18.4	0.575919	0.639179	0.715051	0.768043	0.820338	0.822572	0.852636	0.985346
18.5	0.576355	0.641351	0.712407	0.770052	0.813026	0.816531	0.85012	0.991338
18.6	0.579818	0.645184	0.714691	0.767948	0.820653	0.823352	0.853697	0.98914
18.7	0.5774	0.640843	0.714579	0.761252	0.814671	0.822638	0.851715	0.984328
18.8	0.575913	0.640008	0.717053	0.771539	0.816273	0.817501	0.851693	0.990457
18.9	0.578403	0.642114	0.717593	0.764672	0.818602	0.817855	0.854061	0.98535
19	0.575926	0.639031	0.71699	0.764735	0.812046	0.820548	0.848754	0.988963
19.1	0.576778	0.644581	0.713967	0.763185	0.814549	0.817403	0.848453	0.986827
19.2	0.576938	0.645646	0.711048	0.766628	0.819912	0.81718	0.849494	0.984629
19.3	0.580073	0.644139	0.712515	0.764263	0.820181	0.822605	0.85527	0.987027
19.4	0.581682	0.648211	0.713053	0.764423	0.819503	0.821632	0.842369	0.98593
19.5	0.579494	0.647346	0.715529	0.763375	0.815552	0.81814	0.848505	0.982143
19.6	0.577895	0.644863	0.714589	0.758425	0.81241	0.820082	0.848305	0.980842
19.7	0.580113	0.638855	0.713996	0.759657	0.813688	0.820446	0.848	0.98305
19.8	0.584355	0.643225	0.715103	0.765288	0.811313	0.814494	0.848803	0.982703
19.9	0.579851	0.647389	0.715454	0.762412	0.809563	0.8189	0.851136	0.978306
20	0.582855	0.645528	0.713161	0.762988	0.815385	0.818408	0.845766	0.979181
20.1	0.584774	0.64785	0.710425	0.76654	0.809973	0.817937	0.848233	0.977799
20.2	0.587844	0.646229	0.71433	0.763506	0.807365	0.816639	0.845511	0.978608
20.3	0.585695	0.642304	0.713688	0.76214	0.810743	0.812276	0.840132	0.976459
20.4	0.586743	0.645341	0.711975	0.763323	0.808315	0.813596	0.846195	0.978215
20.5	0.582943	0.645285	0.710258	0.762228	0.81336	0.819168	0.846212	0.977595
20.6	0.588214	0.64541	0.705302	0.760699	0.812672	0.818897	0.843958	0.974539
20.7	0.585521	0.647526	0.71072	0.757744	0.811981	0.812341	0.845648	0.974975
20.8	0.58406	0.64827	0.712951	0.760125	0.812528	0.80919	0.837668	0.976573
20.9	0.587887	0.644909	0.713302	0.75606	0.809455	0.814277	0.84251	0.971263
21	0.586727	0.64386	0.704715	0.758183	0.810946	0.815647	0.842942	0.97523
21.1	0.584771	0.64615	0.705786	0.758743	0.80935	0.806559	0.849213	0.974713
21.2	0.583533	0.647657	0.70765	0.753075	0.808947	0.816554	0.846615	0.978057
21.3	0.585489	0.64599	0.709967	0.758455	0.811385	0.81035	0.84176	0.970745
21.4	0.586118	0.645361	0.710157	0.759749	0.812096	0.812535	0.841855	0.972495
21.5	0.584309	0.642265	0.710478	0.76462	0.808286	0.811401	0.845023	0.972482
21.6	0.583975	0.646727	0.708548	0.759631	0.80482	0.809888	0.841625	0.964272
21.7	0.585983	0.645616	0.708853	0.759287	0.806094	0.813606	0.838857	0.968416
21.8	0.58616	0.646091	0.709524	0.759568	0.807336	0.81091	0.83982	0.967338
21.9	0.582642	0.647742	0.706465	0.760777	0.807473	0.810091	0.837249	0.968256
22	0.586684	0.646727	0.708302	0.75641	0.805875	0.808751	0.837193	0.968835
22.1	0.586914	0.644945	0.709269	0.754304	0.804237	0.80918	0.838494	0.969284
22.2	0.586462	0.647258	0.709455	0.756443	0.800908	0.803493	0.836014	0.971915
22.3	0.586422	0.647788	0.711415	0.75814	0.802431	0.808862	0.833478	0.969903
22.4	0.586465	0.64428	0.706543	0.752161	0.798369	0.809321	0.834238	0.966788
22.5	0.585299	0.647172	0.707578	0.755801	0.80325	0.804056	0.835162	0.963211
22.6	0.585623	0.642062	0.709043	0.755847	0.803034	0.807568	0.835057	0.958097
22.7	0.585102	0.643081	0.706805	0.756728	0.795418	0.804951	0.835044	0.958916
22.8	0.585548	0.645793	0.706091	0.752374	0.801036	0.804748	0.834222	0.96745
22.9	0.589967	0.642579	0.707709	0.754667	0.798543	0.806313	0.832187	0.962831
23	0.584896	0.643071	0.705246	0.748338	0.798356	0.810051	0.832744	0.958198
23.1	0.586249	0.647526	0.703942	0.752545	0.803902	0.800528	0.833193	0.959722
23.2	0.587762	0.643723	0.706658	0.751745	0.79739	0.802831	0.833082	0.953736
23.3	0.585905	0.645495	0.707375	0.752319	0.799087	0.799945	0.827178	0.95979
23.4	0.590003	0.641659	0.708053	0.755342	0.80078	0.795408	0.831768	0.960921
23.5	0.588034	0.645695	0.704558	0.753835	0.798454	0.79948	0.829164	0.954605
23.6	0.588653	0.643271	0.703935	0.747418	0.792253	0.796548	0.825232	0.956839
23.7	0.591382	0.643474	0.705714	0.749016	0.797422	0.797773	0.825439	0.959017
23.8	0.589741	0.646989	0.708505	0.751631	0.797966	0.799847	0.824721	0.951496
23.9	0.588231	0.646494	0.705528	0.74522	0.793334	0.795598	0.821265	0.953288
24	0.594789	0.64369	0.703162	0.745767	0.794035	0.797694	0.825861	0.956269
24.1	0.58788	0.644168	0.702736	0.750402	0.795038	0.798595	0.828839	0.950549
24.2	0.58767	0.644483	0.702121	0.749927	0.792466	0.795165	0.830428	0.951571
24.3	0.58789	0.642746	0.701049	0.748934	0.790893	0.793688	0.819748	0.949599
24.4	0.592041	0.643009	0.694209	0.750255	0.794775	0.793871	0.823529	0.950647
24.5	0.586838	0.641885	0.699755	0.745973	0.792544	0.794369	0.818638	0.944668
24.6	0.586439	0.638973	0.69927	0.751067	0.79378	0.793717	0.821026	0.945537
24.7	0.590734	0.64234	0.697134	0.743421	0.792643	0.793586	0.819476	0.945851
24.8	0.588106	0.645439	0.701252	0.742173	0.794694	0.796839	0.821658	0.94476
24.9	0.589014	0.641125	0.698107	0.746229	0.787948	0.792538	0.817743	0.943827
25	0.590062	0.642068	0.701452	0.744692	0.793088	0.792335	0.818186	0.941576
25.1	0.593705	0.639277	0.702304	0.741226	0.788197	0.786035	0.822929	0.942798
25.2	0.590557	0.64066	0.700135	0.741688	0.784328	0.781544	0.822526	0.945926
25.3	0.587595	0.639146	0.69779	0.745249	0.786048	0.788201	0.819116	0.9379
25.4	0.590272	0.6435	0.696342	0.741606	0.790281	0.784836	0.816708	0.94079
25.5	0.586324	0.645256	0.700637	0.743133	0.787637	0.777953	0.81795	0.944724
25.6	0.584198	0.641764	0.696443	0.742618	0.785619	0.779362	0.819604	0.939175
25.7	0.58769	0.638776	0.696886	0.742307	0.781475	0.783657	0.812954	0.939777
25.8	0.588758	0.640358	0.697112	0.739247	0.779382	0.779827	0.816056	0.939813
25.9	0.584679	0.64179	0.693167	0.738779	0.787195	0.78235	0.809432	0.930343
26	0.587562	0.641741	0.698432	0.735755	0.78213	0.775909	0.814936	0.933982
26.1	0.590055	0.641108	0.692489	0.738838	0.778877	0.786074	0.818153	0.932655
26.2	0.588001	0.636686	0.698271	0.740116	0.784296	0.781806	0.808865	0.927289
26.3	0.585502	0.640712	0.696119	0.734163	0.780237	0.780617	0.809494	0.933854
26.4	0.588604	0.640355	0.691788	0.736597	0.778022	0.77758	0.808459	0.9362
26.5	0.588771	0.634111	0.696712	0.734124	0.779477	0.773449	0.809042	0.928685
26.6	0.584401	0.637721	0.689105	0.738428	0.779156	0.778808	0.807568	0.930949
26.7	0.588679	0.637118	0.689672	0.736695	0.780708	0.776889	0.807473	0.926936
26.8	0.589128	0.637521	0.693885	0.740279	0.776679	0.777079	0.807234	0.926182
26.9	0.592024	0.636253	0.691772	0.734468	0.775313	0.777524	0.808754	0.92917
27	0.587346	0.633226	0.691094	0.731316	0.77868	0.77452	0.80668	0.925294
27.1	0.584971	0.634353	0.690799	0.734353	0.774448	0.776233	0.804033	0.927234
27.2	0.590285	0.63989	0.688905	0.731788	0.778019	0.772122	0.804142	0.926497
27.3	0.587438	0.634471	0.69166	0.73605	0.773809	0.776712	0.807047	0.92361
27.4	0.586013	0.634252	0.689374	0.730009	0.774097	0.775791	0.803886	0.925029
27.5	0.589263	0.634681	0.684191	0.730317	0.775201	0.774097	0.798241	0.925474
27.6	0.586347	0.632489	0.690209	0.73014	0.768266	0.777708	0.803133	0.92117
27.7	0.587363	0.637341	0.690094	0.730599	0.770818	0.776204	0.80291	0.919938
27.8	0.586344	0.633613	0.688073	0.72825	0.76901	0.770681	0.799126	0.923869
27.9	0.583084	0.632427	0.684827	0.729498	0.773655	0.771893	0.79757	0.920302
28	0.591005	0.634275	0.687054	0.727179	0.765563	0.765865	0.799074	0.921098
28.1	0.58334	0.633538	0.683519	0.731346	0.764643	0.769573	0.797449	0.916695
28.2	0.58884	0.62806	0.681488	0.732165	0.769419	0.764066	0.79321	0.916875
28.3	0.588093	0.634891	0.68427	0.726215	0.767506	0.766605	0.800744	0.912629
28.4	0.587408	0.634	0.682419	0.727955	0.763608	0.766802	0.795732	0.910077
28.5	0.585302	0.626366	0.683293	0.722533	0.766461	0.759719	0.792427	0.913036
28.6	0.587356	0.629243	0.682094	0.721924	0.763961	0.766425	0.791739	0.908613
28.7	0.586884	0.627821	0.681606	0.724584	0.766035	0.761645	0.791771	0.909596
28.8	0.585954	0.630419	0.683365	0.722822	0.759889	0.762255	0.790848	0.910261
28.9	0.589603	0.627752	0.677354	0.725125	0.764305	0.761537	0.791306	0.911702
29	0.586806	0.628679	0.67665	0.72025	0.758608	0.761979	0.79108	0.905481
29.1	0.582796	0.631778	0.676967	0.727277	0.759116	0.76253	0.787034	0.909399
29.2	0.58733	0.627677	0.675683	0.717983	0.75891	0.758258	0.790281	0.907217
29.3	0.587281	0.627035	0.680027	0.715057	0.762618	0.759611	0.78804	0.905239
29.4	0.581947	0.626537	0.674425	0.720486	0.759047	0.756735	0.786982	0.903224
29.5	0.587251	0.626498	0.67528	0.723791	0.761183	0.757993	0.78518	0.901927
29.6	0.586019	0.623975	0.674779	0.714284	0.760777	0.758687	0.781658	0.898615
29.7	0.581164	0.627877	0.681911	0.715126	0.753704	0.757868	0.784391	0.902205
29.8	0.584696	0.625849	0.674743	0.716168	0.753963	0.758789	0.782445	0.897088
29.9	0.582986	0.623867	0.675274	0.716541	0.753747	0.752735	0.782946	0.904888

[truncated: 6 more sheets: DDL n=3, DDL n=4, DDDL n=1, DDDL n=2, DDDL n=3, DDDL n=4]
