# Supplementary material for: Towards a molecular mechanism underlying mitochondrial protein import through the TOM and TIM23 complexes
Source: eLife. 2022 Jun 8;11:e75426. doi: 10.7554/eLife.75426 (PMC9255969; doi:10.7554/eLife.75426)
Supplement: Figure 3—figure supplement 1—source data 2. [file elife-75426-fig3-figsupp1-data2.xlsx]

## Sheet: LDDD n=1
x correct	19	17.2667	15.5333	13.8	12.0666	10.3333	8.59996	6.86662
time	18	38.82	83.58	180	388	703.7	1693	3035
0	0.0034513	0.00368334	0.00401998	0.00466219	0.00503641	0.00668852	0.0101741	0.0140389
0.1	0.00354771	0.00395134	0.00418829	0.00549233	0.00667381	0.00903677	0.013663	0.018652
0.2	0.00384512	0.00402651	0.00476514	0.00612474	0.008071	0.0111987	0.0183595	0.024633
0.3	0.00364903	0.00431249	0.00535997	0.00764449	0.00999111	0.0147628	0.0240692	0.0328935
0.4	0.00395624	0.0046148	0.00617704	0.00845339	0.0123655	0.0185295	0.0300501	0.0414515
0.5	0.00384349	0.00489097	0.00664113	0.00998294	0.0151713	0.0234139	0.0380116	0.0505014
0.6	0.00410005	0.00540572	0.00707908	0.0121057	0.0182582	0.028568	0.0465288	0.0607637
0.7	0.00442688	0.00553319	0.0082818	0.0141696	0.021716	0.0341485	0.0542991	0.0713644
0.8	0.00451675	0.0058976	0.00919529	0.0156991	0.0256331	0.0396785	0.0645451	0.0822379
0.9	0.00492529	0.00641072	0.0102019	0.0186161	0.0296449	0.0462314	0.0741538	0.0971559
1	0.00501843	0.00715098	0.0116743	0.0205623	0.0339933	0.0530669	0.0847267	0.109157
1.1	0.00516224	0.00749905	0.0122446	0.0228436	0.0388026	0.0597604	0.0953077	0.123426
1.2	0.00569333	0.00741571	0.0138885	0.0265596	0.0435089	0.0681827	0.107876	0.136738
1.3	0.00594499	0.00842234	0.0153413	0.0283327	0.0483002	0.0763518	0.119039	0.15348
1.4	0.00600709	0.00904331	0.0169297	0.0319915	0.0543955	0.0852022	0.130636	0.16727
1.5	0.00606101	0.00975743	0.0178742	0.0345979	0.06045	0.0937308	0.14433	0.181781
1.6	0.00628979	0.00985384	0.0196652	0.0373057	0.0653115	0.10198	0.156606	0.197905
1.7	0.00686501	0.0112167	0.0211523	0.0413126	0.0716683	0.111822	0.170529	0.215896
1.8	0.00721798	0.0116416	0.0231933	0.0450172	0.0781493	0.119519	0.182997	0.231065
1.9	0.00748271	0.0122315	0.0246804	0.0491319	0.0842234	0.130234	0.198458	0.24808
2	0.00779647	0.0132921	0.0262132	0.0525604	0.09109	0.139622	0.211434	0.264246
2.1	0.00798602	0.0140879	0.0281807	0.0566326	0.097437	0.150473	0.224556	0.278748
2.2	0.00868707	0.0147612	0.0294422	0.0598437	0.105389	0.160193	0.237938	0.296862
2.3	0.00911358	0.0160162	0.0321778	0.0642869	0.112487	0.169466	0.252909	0.313637
2.4	0.00914626	0.016642	0.0338348	0.0685814	0.118658	0.182559	0.26707	0.329741
2.5	0.0096316	0.0176438	0.037443	0.072992	0.126678	0.190431	0.283431	0.346736
2.6	0.0103408	0.0181422	0.0377845	0.0775316	0.133837	0.20125	0.293868	0.361781
2.7	0.0105108	0.0195492	0.0408763	0.0813522	0.142433	0.212881	0.306994	0.381303
2.8	0.0116203	0.0200443	0.0425676	0.0857382	0.148046	0.225411	0.324102	0.394621
2.9	0.0116579	0.0221638	0.0450875	0.0907256	0.156625	0.233775	0.338121	0.415463
3	0.0115566	0.0223811	0.0476432	0.0954973	0.165206	0.246735	0.352924	0.428734
3.1	0.0123426	0.0237898	0.0500814	0.099282	0.172977	0.256814	0.362546	0.443644
3.2	0.0129358	0.0244777	0.0523773	0.105552	0.180883	0.267008	0.379567	0.460753
3.3	0.0131515	0.0256298	0.0545328	0.109106	0.188436	0.277826	0.391961	0.477029
3.4	0.0140242	0.0262361	0.0565852	0.11485	0.196294	0.289038	0.405212	0.491614
3.5	0.0148134	0.0280222	0.0599548	0.118287	0.205406	0.300733	0.416028	0.504002
3.6	0.0152612	0.028983	0.0616396	0.123031	0.213335	0.311272	0.429981	0.517737
3.7	0.0153331	0.0294635	0.0642379	0.128365	0.221015	0.322982	0.444449	0.53006
3.8	0.0161502	0.0317251	0.0679588	0.133875	0.230055	0.328855	0.456524	0.547294
3.9	0.0165505	0.0319833	0.0699639	0.140894	0.238772	0.340838	0.469888	0.559383
4	0.0169395	0.0334835	0.0728972	0.143766	0.245135	0.351921	0.480758	0.574669
4.1	0.0179052	0.0349722	0.0759269	0.148885	0.253927	0.362272	0.48985	0.585792
4.2	0.0179477	0.0362402	0.0776346	0.15681	0.261517	0.37306	0.504505	0.597824
4.3	0.0187566	0.0377698	0.0806495	0.160655	0.270005	0.383496	0.516681	0.613087
4.4	0.0192992	0.039149	0.0836237	0.165621	0.278965	0.389041	0.525014	0.6215
4.5	0.019858	0.0396425	0.0870227	0.171307	0.28406	0.403653	0.536928	0.633573
4.6	0.0204921	0.0413126	0.0888349	0.175537	0.292489	0.411842	0.549701	0.644157
4.7	0.0209202	0.0425889	0.0918156	0.181665	0.301987	0.420256	0.559875	0.658305
4.8	0.0221311	0.044004	0.0944874	0.188344	0.311246	0.430624	0.568595	0.667295
4.9	0.0227129	0.0453849	0.0972082	0.192956	0.317823	0.438976	0.579187	0.680928
5	0.0233012	0.0471579	0.100748	0.19874	0.327234	0.450649	0.58456	0.690594
5.1	0.0234531	0.0478344	0.104782	0.202556	0.332839	0.457981	0.596068	0.697051
5.2	0.0241885	0.0490045	0.107291	0.20913	0.341273	0.468914	0.608817	0.708498
5.3	0.0254795	0.0506533	0.10876	0.213515	0.34856	0.473246	0.614997	0.714768
5.4	0.0256559	0.0528447	0.111911	0.218647	0.356663	0.484665	0.623613	0.729513
5.5	0.0266953	0.0532336	0.115623	0.225233	0.362842	0.492182	0.632777	0.73845
5.6	0.0271937	0.0556816	0.117911	0.228862	0.37013	0.500753	0.64167	0.743648
5.7	0.0272492	0.0557322	0.121846	0.234468	0.377933	0.507177	0.649138	0.752646
5.8	0.0283376	0.0580151	0.124387	0.239089	0.382452	0.519108	0.657928	0.762616
5.9	0.0289798	0.0597996	0.129043	0.24583	0.391771	0.52503	0.66846	0.771312
6	0.029318	0.059579	0.131056	0.249714	0.401215	0.531114	0.676081	0.776022
6.1	0.0307463	0.0610987	0.1349	0.255249	0.403434	0.537209	0.680296	0.784015
6.2	0.0313084	0.0631839	0.135501	0.259462	0.413258	0.548738	0.686821	0.793604
6.3	0.0324948	0.0653034	0.14025	0.26641	0.417435	0.554549	0.697752	0.79837
6.4	0.0323363	0.0662299	0.143667	0.272061	0.42665	0.561017	0.702834	0.80424
6.5	0.0334835	0.0674735	0.145043	0.276922	0.436596	0.567822	0.709029	0.811986
6.6	0.0344705	0.069758	0.149543	0.282246	0.438293	0.576211	0.716191	0.819067
6.7	0.0348267	0.070544	0.152218	0.289607	0.447685	0.584174	0.719612	0.823587
6.8	0.03525	0.0717075	0.156897	0.292471	0.453729	0.589721	0.73102	0.828795
6.9	0.0356274	0.0741016	0.158698	0.296869	0.458848	0.595174	0.730993	0.838361
7	0.0364429	0.0758648	0.161887	0.301596	0.464675	0.600813	0.740872	0.843549
7.1	0.0370704	0.0772865	0.163855	0.308484	0.468169	0.606175	0.748892	0.849968
7.2	0.0378433	0.07803	0.166251	0.31137	0.478117	0.613984	0.750959	0.858783
7.3	0.0388696	0.0791984	0.169818	0.317142	0.480908	0.620127	0.754309	0.860688
7.4	0.039064	0.0809633	0.174676	0.322258	0.488022	0.623417	0.761861	0.865837
7.5	0.0402619	0.0835142	0.175346	0.32734	0.495351	0.629043	0.768649	0.870956
7.6	0.0406475	0.0857203	0.182064	0.331735	0.499279	0.63666	0.772618	0.873217
7.7	0.0414041	0.0859082	0.182375	0.335689	0.504378	0.641093	0.777587	0.876221
7.8	0.0425889	0.087441	0.186643	0.340958	0.511702	0.650725	0.783067	0.886501
7.9	0.0430562	0.0889885	0.189751	0.347342	0.516639	0.64709	0.78439	0.891201
8	0.0442998	0.0896438	0.193722	0.352388	0.520647	0.659082	0.79228	0.89643
8.1	0.0452427	0.0914757	0.194913	0.356565	0.528658	0.664043	0.795612	0.896579
8.2	0.0459699	0.0938615	0.199611	0.359458	0.532277	0.66663	0.796774	0.900176
8.3	0.0463425	0.0949106	0.201504	0.365159	0.53673	0.671342	0.806448	0.910395
8.4	0.0458179	0.0974566	0.203876	0.370086	0.541597	0.678085	0.80794	0.91292
8.5	0.0479423	0.0997281	0.207594	0.375168	0.547132	0.684134	0.81038	0.915046
8.6	0.0488002	0.100164	0.211348	0.379788	0.551564	0.683664	0.814944	0.918135
8.7	0.0492725	0.101916	0.21509	0.384097	0.560558	0.693691	0.819029	0.922673
8.8	0.0501304	0.103532	0.21852	0.389049	0.561079	0.69565	0.821552	0.927931
8.9	0.0513936	0.103874	0.220824	0.393528	0.567209	0.700097	0.825584	0.927345
9	0.0514442	0.106663	0.223816	0.39809	0.572484	0.701817	0.832486	0.929003
9.1	0.0516207	0.107152	0.227364	0.401663	0.576683	0.706687	0.836176	0.93562
9.2	0.052647	0.109479	0.230998	0.404712	0.579651	0.712091	0.83757	0.939941
9.3	0.053518	0.111344	0.235173	0.409454	0.581918	0.714835	0.839593	0.937535
9.4	0.054304	0.113419	0.23569	0.414811	0.588802	0.717209	0.8435	0.939959
9.5	0.0560051	0.114921	0.24085	0.417267	0.592963	0.720793	0.844098	0.944624
9.6	0.0556979	0.116663	0.241555	0.420931	0.599016	0.725292	0.84855	0.947061
9.7	0.0569039	0.118209	0.244312	0.427052	0.602238	0.726045	0.852678	0.947128
9.8	0.0576883	0.118132	0.247943	0.429065	0.602571	0.73274	0.850908	0.954854
9.9	0.0579285	0.120331	0.252291	0.432909	0.609981	0.735525	0.858646	0.95412
10	0.059262	0.1218	0.255754	0.439043	0.611296	0.737326	0.858698	0.960554
10.1	0.05953	0.123207	0.258632	0.441596	0.61647	0.743993	0.864045	0.957552
10.2	0.0606216	0.125222	0.261254	0.446417	0.622305	0.745691	0.860057	0.963993
10.3	0.0618749	0.127052	0.261491	0.450634	0.623211	0.746215	0.86447	0.967201
10.4	0.0623096	0.128205	0.264297	0.455279	0.627391	0.755283	0.8693	0.965855
10.5	0.063027	0.130205	0.269387	0.458094	0.630241	0.753288	0.872691	0.96778
10.6	0.0647396	0.132806	0.273327	0.459424	0.63112	0.755066	0.874508	0.969563
10.7	0.064635	0.132125	0.275602	0.463685	0.636816	0.756713	0.874286	0.972246
10.8	0.0647984	0.135068	0.278194	0.471509	0.641286	0.760998	0.879007	0.973233
10.9	0.0663819	0.137209	0.280465	0.470925	0.640462	0.765168	0.882963	0.978325
11	0.0663361	0.138903	0.285109	0.47729	0.649131	0.768123	0.883888	0.97621
11.1	0.0675862	0.139372	0.285147	0.478197	0.647527	0.769564	0.882623	0.980253
11.2	0.0684474	0.141433	0.289386	0.482232	0.652844	0.77237	0.885182	0.980091
11.3	0.0680536	0.142577	0.29396	0.489867	0.652841	0.773592	0.883772	0.982476
11.4	0.070745	0.144211	0.296021	0.489664	0.660105	0.77888	0.887209	0.977254
11.5	0.0704509	0.145494	0.298052	0.494403	0.658217	0.779434	0.890532	0.982627
11.6	0.0706421	0.148821	0.300766	0.497495	0.664165	0.780748	0.891969	0.986961
11.7	0.0719576	0.149321	0.303034	0.497542	0.668542	0.785835	0.894012	0.985678
11.8	0.0728727	0.151442	0.305165	0.503897	0.667648	0.78385	0.897293	0.986224
11.9	0.0728188	0.153079	0.309139	0.507597	0.673122	0.782831	0.895691	0.989097
12	0.0743875	0.153919	0.310203	0.50796	0.674173	0.787603	0.900734	0.99004
12.1	0.0751	0.154857	0.314084	0.511565	0.677417	0.789481	0.898494	0.987826
12.2	0.0760592	0.157652	0.318573	0.514923	0.679163	0.792228	0.901378	0.991123
12.3	0.07661	0.157774	0.319993	0.51706	0.680155	0.794904	0.898708	0.990641
12.4	0.0771361	0.159737	0.32411	0.516738	0.678817	0.792113	0.903189	0.989582
12.5	0.0789991	0.162298	0.32533	0.522919	0.687355	0.797385	0.904174	0.991717
12.6	0.0787229	0.164162	0.32828	0.526066	0.68819	0.798303	0.904194	0.990654
12.7	0.0789419	0.165141	0.329965	0.529259	0.686481	0.802454	0.905349	0.994338
12.8	0.0819716	0.166968	0.333504	0.533928	0.692501	0.800697	0.907753	0.992284
12.9	0.083037	0.169725	0.333261	0.53456	0.69288	0.805342	0.910891	0.995629
13	0.0830256	0.169385	0.339557	0.534874	0.697546	0.804659	0.90841	0.995367
13.1	0.0825435	0.172542	0.342814	0.539678	0.699237	0.807659	0.908846	0.999518
13.2	0.0841237	0.174441	0.34578	0.540092	0.696255	0.806278	0.910541	0.995591
13.3	0.084815	0.172663	0.345744	0.543122	0.704749	0.808487	0.909482	0.997305
13.4	0.084864	0.175379	0.349097	0.546664	0.702667	0.812334	0.907928	0.994004
13.5	0.0862906	0.176446	0.353872	0.550403	0.704213	0.811453	0.91092	0.99491
13.6	0.0876306	0.179002	0.349903	0.552377	0.708196	0.810283	0.912386	0.996599
13.7	0.0883888	0.181208	0.354398	0.552722	0.708124	0.814423	0.912753	0.997753
13.8	0.08875	0.180852	0.358423	0.55703	0.70908	0.811783	0.912796	0.997008
13.9	0.08925	0.183478	0.359103	0.558092	0.713008	0.814831	0.912801	0.996389
14	0.0896455	0.185108	0.363118	0.559553	0.713598	0.818055	0.915228	0.996291
14.1	0.0908139	0.187267	0.365159	0.560622	0.717178	0.813842	0.915935	1
14.2	0.0921849	0.188503	0.368109	0.568441	0.716286	0.819562	0.914768	0.99558
14.3	0.0932062	0.189202	0.370111	0.569882	0.718061	0.819926	0.918123	0.999392
14.4	0.0930216	0.190879	0.371964	0.570019	0.722417	0.821397	0.917388	0.995977
14.5	0.0941034	0.192818	0.377579	0.575662	0.722934	0.821461	0.915304	0.994356
14.6	0.0944041	0.19317	0.376865	0.573737	0.723076	0.823288	0.914198	0.997256
14.7	0.0944531	0.197078	0.3785	0.577584	0.723153	0.824097	0.91509	0.995152
14.8	0.0963683	0.196565	0.381615	0.581674	0.722862	0.824718	0.916233	0.994638
14.9	0.0968781	0.199986	0.380656	0.581205	0.726594	0.827138	0.915598	0.997045
15	0.096937	0.199258	0.386836	0.582743	0.72474	0.821482	0.918824	0.997197
15.1	0.0984518	0.201384	0.384983	0.585197	0.730506	0.825806	0.917499	0.99505
15.2	0.0985335	0.204028	0.390124	0.589324	0.732431	0.826491	0.917991	0.99707
15.3	0.100687	0.202723	0.39133	0.588286	0.729841	0.824948	0.918246	0.994367
15.4	0.0994437	0.205502	0.393745	0.588564	0.734177	0.8245	0.916432	0.994107
15.5	0.100859	0.206857	0.394861	0.591258	0.732168	0.828703	0.914092	0.990257
15.6	0.10146	0.209236	0.396888	0.592907	0.737087	0.830803	0.916726	0.998251
15.7	0.102908	0.210398	0.40012	0.596558	0.735139	0.828233	0.917099	0.991408
15.8	0.102748	0.211706	0.399788	0.599501	0.737471	0.828901	0.915313	0.991177
15.9	0.104059	0.212912	0.402963	0.602714	0.735613	0.825381	0.917128	0.98905
16	0.104874	0.21432	0.405436	0.599751	0.738692	0.826059	0.916022	0.990221
16.1	0.1056	0.216216	0.407988	0.603889	0.737747	0.831493	0.91336	0.990064
16.2	0.106183	0.215682	0.409683	0.60632	0.741035	0.83207	0.916195	0.986925
16.3	0.108008	0.218945	0.412075	0.607966	0.741086	0.833732	0.915384	0.990547
16.4	0.10615	0.219821	0.413257	0.607203	0.743748	0.82896	0.914365	0.99011
16.5	0.106962	0.221192	0.415737	0.60731	0.740787	0.83266	0.918751	0.987429
16.6	0.10962	0.220958	0.415906	0.611616	0.745212	0.828747	0.915051	0.987764
16.7	0.109933	0.223898	0.418447	0.610206	0.742369	0.831292	0.914329	0.987089
16.8	0.110146	0.224849	0.423699	0.613695	0.744186	0.827945	0.913219	0.982601
16.9	0.111951	0.226926	0.422215	0.614532	0.745544	0.830643	0.917144	0.984878
17	0.111783	0.22815	0.424624	0.616037	0.743205	0.828077	0.91225	0.983624
17.1	0.11269	0.228374	0.424516	0.616364	0.74865	0.831622	0.9106	0.983842
17.2	0.112577	0.23215	0.427322	0.61857	0.748761	0.832022	0.909211	0.982131
17.3	0.113322	0.232789	0.429387	0.620823	0.745598	0.83189	0.908398	0.982624
17.4	0.115885	0.234423	0.429948	0.621179	0.749743	0.837526	0.909689	0.978637
17.5	0.114702	0.234412	0.433572	0.623039	0.752373	0.831499	0.910292	0.978867
17.6	0.11604	0.235283	0.437065	0.622967	0.751927	0.833307	0.910073	0.977212
17.7	0.117184	0.238595	0.434956	0.62342	0.750878	0.833555	0.910198	0.976769
17.8	0.118091	0.239592	0.440539	0.625356	0.751033	0.833655	0.907784	0.978173
17.9	0.116975	0.240264	0.440526	0.627206	0.750685	0.831168	0.909113	0.974558
18	0.118045	0.241246	0.440055	0.627458	0.749851	0.834537	0.908732	0.976486
18.1	0.119179	0.242452	0.442312	0.629638	0.748719	0.832996	0.907947	0.973988
18.2	0.119656	0.24363	0.44334	0.630172	0.753685	0.833839	0.90792	0.974962
18.3	0.120815	0.24564	0.446819	0.630729	0.752289	0.833289	0.904941	0.974641
18.4	0.120643	0.24684	0.445052	0.630489	0.753801	0.830225	0.90924	0.972014
18.5	0.122212	0.248278	0.448435	0.635128	0.751012	0.829963	0.905905	0.970058
18.6	0.124676	0.24851	0.44959	0.63507	0.751619	0.833235	0.906256	0.971854
18.7	0.122972	0.251534	0.450466	0.63649	0.752657	0.828198	0.902885	0.968415
18.8	0.124129	0.249877	0.452099	0.636063	0.754291	0.828457	0.902097	0.966945
18.9	0.123289	0.253924	0.454292	0.638978	0.751976	0.829623	0.900777	0.968071
19	0.125271	0.253249	0.45663	0.639067	0.756767	0.827211	0.899255	0.96837
19.1	0.126605	0.254548	0.455153	0.638116	0.757623	0.827618	0.899989	0.968594
19.2	0.126925	0.257174	0.457941	0.637424	0.755739	0.831101	0.895048	0.963969
19.3	0.127535	0.259073	0.459176	0.640459	0.752928	0.828274	0.899305	0.960469
19.4	0.127868	0.258689	0.459939	0.640997	0.754277	0.828935	0.896808	0.959738
19.5	0.129422	0.259097	0.462691	0.642299	0.754909	0.830792	0.89587	0.961371
19.6	0.129071	0.259731	0.46317	0.640387	0.756723	0.829082	0.898863	0.960733
19.7	0.129458	0.261784	0.465281	0.640173	0.756607	0.827564	0.898272	0.960764
19.8	0.13201	0.262228	0.467647	0.642189	0.755112	0.826378	0.897612	0.957127
19.9	0.130682	0.264972	0.465932	0.645788	0.756625	0.827916	0.896871	0.955872
20	0.130894	0.265774	0.467798	0.645456	0.75408	0.825304	0.890686	0.955132
20.1	0.131324	0.265851	0.471759	0.643757	0.756213	0.830195	0.894481	0.949958
20.2	0.133721	0.268033	0.469754	0.64552	0.759704	0.824239	0.89366	0.951579
20.3	0.134885	0.269276	0.471842	0.645641	0.755133	0.827148	0.890555	0.949621
20.4	0.134896	0.270515	0.476101	0.645123	0.749335	0.826566	0.892181	0.947119
20.5	0.134373	0.27042	0.474996	0.649081	0.75568	0.823048	0.891021	0.948092
20.6	0.135681	0.271115	0.477022	0.650558	0.756175	0.823209	0.88822	0.949236
20.7	0.137024	0.272956	0.478861	0.651731	0.755043	0.821346	0.88641	0.946482
20.8	0.136344	0.274082	0.477091	0.652385	0.75462	0.825353	0.886749	0.941853
20.9	0.138795	0.275502	0.480678	0.652993	0.754025	0.821493	0.885387	0.943648
21	0.13708	0.276149	0.480694	0.651609	0.755688	0.821979	0.885931	0.944928
21.1	0.138438	0.277439	0.481941	0.651189	0.753314	0.822242	0.884723	0.944037
21.2	0.139846	0.278011	0.482858	0.650641	0.754316	0.819211	0.881831	0.941398
21.3	0.139812	0.27996	0.485986	0.651202	0.753796	0.821959	0.884496	0.940217
21.4	0.140681	0.279602	0.486154	0.65307	0.753386	0.817794	0.87946	0.935411
21.5	0.141655	0.282475	0.485876	0.654952	0.75822	0.819305	0.874997	0.936774
21.6	0.142953	0.283196	0.487543	0.653225	0.756102	0.822791	0.88101	0.936261
21.7	0.143423	0.282791	0.488577	0.653846	0.755751	0.819693	0.877595	0.935023
21.8	0.143018	0.286059	0.489131	0.654727	0.757533	0.817691	0.876114	0.933898
21.9	0.143399	0.285284	0.488494	0.656085	0.753221	0.817563	0.879214	0.930182
22	0.144861	0.284907	0.490756	0.655867	0.751566	0.815269	0.875525	0.931053
22.1	0.143297	0.287621	0.492985	0.655344	0.754009	0.815231	0.876213	0.929797
22.2	0.144461	0.290154	0.492498	0.659041	0.751894	0.816648	0.873797	0.925011
22.3	0.14736	0.288288	0.49353	0.656867	0.755955	0.813753	0.872452	0.928574
22.4	0.147898	0.290816	0.494503	0.656895	0.751767	0.812042	0.87214	0.924889
22.5	0.147314	0.291726	0.498765	0.658568	0.752891	0.811654	0.868017	0.921936
22.6	0.147448	0.294192	0.495232	0.656706	0.751799	0.812329	0.869408	0.923227
22.7	0.1492	0.292708	0.497706	0.656684	0.752448	0.813217	0.869766	0.918339
22.8	0.149398	0.294939	0.499812	0.657882	0.755623	0.808667	0.866906	0.920395
22.9	0.148865	0.297089	0.496165	0.656339	0.750762	0.809422	0.865352	0.915527
23	0.149883	0.297128	0.499503	0.658106	0.748663	0.813996	0.867842	0.91696
23.1	0.152014	0.296424	0.501273	0.657563	0.746273	0.808069	0.864256	0.916035
23.2	0.150476	0.298305	0.502868	0.658903	0.749322	0.809785	0.863167	0.912685
23.3	0.150707	0.298689	0.502495	0.657376	0.749757	0.807185	0.861763	0.915571
23.4	0.153766	0.29949	0.504125	0.658985	0.745813	0.807894	0.858997	0.913082
23.5	0.153027	0.302732	0.504048	0.658938	0.747541	0.804454	0.862594	0.91109
23.6	0.153006	0.301617	0.505108	0.66042	0.748108	0.804592	0.861911	0.9104
23.7	0.152934	0.301899	0.504866	0.659618	0.748364	0.802268	0.856693	0.907573
23.8	0.153798	0.30485	0.505134	0.658444	0.747451	0.805322	0.857909	0.907196
23.9	0.155568	0.305052	0.506751	0.662061	0.746395	0.800492	0.855528	0.905612
24	0.155117	0.306106	0.509066	0.659294	0.747274	0.802104	0.85543	0.905045
24.1	0.157184	0.306554	0.506919	0.658969	0.744668	0.804342	0.855385	0.903883
24.2	0.156813	0.307151	0.509364	0.660384	0.747077	0.801987	0.852812	0.902547
24.3	0.158408	0.308504	0.509509	0.660243	0.745722	0.797625	0.849489	0.900733
24.4	0.157474	0.308348	0.508674	0.660186	0.744066	0.799302	0.851432	0.897785

## Sheet: LDDD n=2
x correct	19	18.1333	17.2667	16.4	15.5333	14.6667	13.8	12.9333
time	100	169.381	286.901	485.956	823.119	1394.21	2361.53	4000
0	0.00359626	0.00369659	0.00412104	0.00467668	0.00490049	0.005842	0.00756295	0.00958489
0.1	0.00400142	0.00380463	0.00488505	0.00578412	0.0062433	0.00860093	0.0100363	0.0135014
0.2	0.00428696	0.00488891	0.00542526	0.00830767	0.00853148	0.0106576	0.013949	0.0175067
0.3	0.00453777	0.00501624	0.0072697	0.011001	0.0108042	0.0152185	0.0196444	0.0246028
0.4	0.00511657	0.00580341	0.00950385	0.0138526	0.0141728	0.0197254	0.0247031	0.0325902
0.5	0.00590759	0.00708062	0.0117612	0.017252	0.0193627	0.0260112	0.0330262	0.0413647
0.6	0.00667161	0.00922989	0.0145973	0.0223609	0.0241359	0.0327021	0.0415615	0.0518757
0.7	0.00773659	0.0111901	0.0179967	0.0278826	0.0295997	0.0417853	0.0506139	0.0638375
0.8	0.00924147	0.0131194	0.0215969	0.033277	0.0359047	0.0497997	0.0612638	0.0738739
0.9	0.0106229	0.0153613	0.0254208	0.0382624	0.0437494	0.0609667	0.0708062	0.0875759
1	0.0115026	0.0176688	0.0298235	0.0446523	0.0503399	0.0683946	0.0829571	0.100722
1.1	0.0131233	0.0197447	0.0343073	0.0504094	0.0571466	0.0778444	0.0948263	0.115408
1.2	0.0147362	0.0230593	0.0397171	0.0582695	0.0645398	0.0873791	0.106344	0.127281
1.3	0.0172675	0.0251931	0.0446446	0.0657668	0.0734648	0.0994181	0.119923	0.140351
1.4	0.0190617	0.0296113	0.0488582	0.0729632	0.083096	0.109582	0.130033	0.157097
1.5	0.0201692	0.0316294	0.0537934	0.0814638	0.0916777	0.121474	0.14358	0.172235
1.6	0.0224959	0.0341336	0.0618001	0.0890731	0.100823	0.132321	0.155708	0.18584
1.7	0.0247147	0.0378418	0.0667083	0.0979904	0.109354	0.143742	0.167982	0.200218
1.8	0.0278324	0.0425956	0.072068	0.106425	0.120004	0.15638	0.183548	0.218211
1.9	0.0301322	0.0471527	0.0784193	0.11552	0.130746	0.168662	0.194858	0.234834
2	0.0336243	0.0500776	0.0846742	0.123627	0.137638	0.17984	0.212959	0.246969
2.1	0.0341992	0.0550089	0.0913497	0.131939	0.148801	0.19135	0.222961	0.262211
2.2	0.0366996	0.0588444	0.0975158	0.14147	0.157618	0.204566	0.239499	0.274365
2.3	0.0394277	0.0620587	0.104249	0.148234	0.166393	0.217528	0.249469	0.291868
2.4	0.0416734	0.0669167	0.111905	0.159906	0.180357	0.22773	0.263766	0.305713
2.5	0.0463077	0.0718751	0.118437	0.168681	0.189583	0.240903	0.2779	0.319276
2.6	0.0475656	0.07529	0.125676	0.177401	0.19955	0.250369	0.291644	0.335895
2.7	0.0505213	0.0796001	0.131368	0.188001	0.212257	0.267412	0.301959	0.347649
2.8	0.0546925	0.08386	0.139093	0.195861	0.224211	0.275955	0.319496	0.361197
2.9	0.0588135	0.0899914	0.148261	0.206882	0.230377	0.288646	0.330748	0.377835
3	0.0612676	0.0950849	0.151776	0.217014	0.239306	0.301249	0.337952	0.393613
3.1	0.0643121	0.0991171	0.160925	0.224203	0.252931	0.313901	0.354054	0.402546
3.2	0.069093	0.10484	0.166917	0.233599	0.260802	0.322564	0.367116	0.418687
3.3	0.0705516	0.107984	0.173516	0.241949	0.272598	0.334475	0.37748	0.434009
3.4	0.0744642	0.114062	0.182823	0.251287	0.282642	0.352318	0.388558	0.447677
3.5	0.0762122	0.11902	0.188958	0.259529	0.291772	0.359595	0.405725	0.458188
3.6	0.0809699	0.124222	0.198408	0.271259	0.301604	0.370951	0.414299	0.469104
3.7	0.0837057	0.129469	0.205994	0.28047	0.313658	0.378414	0.423923	0.482146
3.8	0.0899721	0.134794	0.210331	0.287496	0.322602	0.390248	0.437606	0.494486
3.9	0.0914269	0.140223	0.219418	0.296722	0.33453	0.402793	0.450301	0.506784
4	0.0968753	0.143596	0.225156	0.303923	0.342598	0.413269	0.458392	0.519614
4.1	0.0998966	0.151587	0.234787	0.320847	0.354027	0.424533	0.470111	0.532401
4.2	0.103277	0.154967	0.240197	0.328965	0.364187	0.434889	0.480707	0.54635
4.3	0.107722	0.161743	0.249921	0.337373	0.373888	0.442888	0.493653	0.55644
4.4	0.111654	0.166015	0.255782	0.344246	0.382215	0.456694	0.504545	0.564852
4.5	0.115146	0.170815	0.264765	0.350666	0.38801	0.467734	0.514528	0.575089
4.6	0.119765	0.176144	0.271695	0.363149	0.399656	0.472044	0.52539	0.584454
4.7	0.122192	0.180454	0.277931	0.368053	0.40872	0.481668	0.536163	0.595884
4.8	0.127293	0.185343	0.284085	0.378275	0.421677	0.492406	0.539918	0.605758
4.9	0.130804	0.192203	0.293007	0.385649	0.42721	0.503751	0.55242	0.616736
5	0.134702	0.199376	0.296788	0.397672	0.436791	0.513409	0.557517	0.627737
5.1	0.141805	0.201985	0.307164	0.401504	0.440121	0.521107	0.57027	0.63836
5.2	0.142056	0.208197	0.312358	0.413605	0.44929	0.532656	0.577841	0.646119
5.3	0.145236	0.210956	0.318883	0.422584	0.459388	0.538698	0.588286	0.649959
5.4	0.150557	0.219121	0.325018	0.430043	0.46873	0.547149	0.59948	0.663641
5.5	0.153952	0.223682	0.335232	0.437131	0.476285	0.557702	0.604087	0.673365
5.6	0.158911	0.228166	0.341857	0.445848	0.488173	0.563259	0.61466	0.679377
5.7	0.163622	0.233591	0.348124	0.454055	0.492279	0.568915	0.625792	0.691331
5.8	0.166196	0.237056	0.354	0.458134	0.503168	0.576374	0.631754	0.698508
5.9	0.167469	0.244993	0.361864	0.465129	0.508558	0.583497	0.642253	0.703764
6	0.17487	0.251048	0.367837	0.474406	0.516121	0.594533	0.646984	0.716
6.1	0.175939	0.253845	0.376249	0.479622	0.522643	0.602003	0.654076	0.722301
6.2	0.181966	0.261713	0.379826	0.492094	0.532752	0.608467	0.662025	0.728725
6.3	0.184683	0.268064	0.387111	0.494818	0.536495	0.619178	0.667558	0.73263
6.4	0.189819	0.271263	0.394458	0.501424	0.546551	0.625962	0.680928	0.740517
6.5	0.195626	0.274639	0.400238	0.50984	0.55127	0.632687	0.684744	0.752514
6.6	0.198794	0.282916	0.406725	0.51653	0.560573	0.63163	0.685836	0.755416
6.7	0.202139	0.283078	0.411425	0.526019	0.567978	0.643314	0.693697	0.761825
6.8	0.207175	0.288905	0.416966	0.530518	0.57316	0.652008	0.702012	0.762157
6.9	0.208807	0.296873	0.426608	0.539061	0.580279	0.659212	0.708656	0.770163
7	0.2138	0.299069	0.431501	0.543336	0.587753	0.664587	0.714082	0.782499
7.1	0.21833	0.305088	0.434237	0.547241	0.596833	0.668233	0.7255	0.788681
7.2	0.222239	0.312535	0.440835	0.559361	0.599241	0.675499	0.728965	0.794002
7.3	0.226754	0.315275	0.453333	0.563108	0.608663	0.685146	0.73253	0.801746
7.4	0.230161	0.318779	0.45475	0.570702	0.61138	0.686334	0.738553	0.804463
7.5	0.23243	0.324732	0.457547	0.579218	0.617913	0.689776	0.748123	0.808013
7.6	0.236319	0.330389	0.466279	0.576459	0.622261	0.694839	0.746645	0.818153
7.7	0.242601	0.335016	0.469389	0.586411	0.629759	0.701626	0.757777	0.823911
7.8	0.244916	0.343624	0.47608	0.596208	0.634339	0.707534	0.76142	0.825257
7.9	0.248254	0.344338	0.480518	0.598457	0.646498	0.713596	0.768242	0.831674
8	0.253158	0.346144	0.485993	0.606603	0.647316	0.717917	0.768836	0.835957
8.1	0.25594	0.35407	0.4905	0.609358	0.65494	0.7269	0.784653	0.838215
8.2	0.262535	0.361598	0.496929	0.613066	0.655276	0.725345	0.779648	0.841676
8.3	0.26693	0.362076	0.502223	0.617693	0.66417	0.733116	0.787539	0.849991
8.4	0.266297	0.36847	0.512637	0.630519	0.666613	0.744646	0.792582	0.859059
8.5	0.273297	0.370677	0.515149	0.628235	0.67516	0.74546	0.796101	0.859781
8.6	0.277946	0.378402	0.520269	0.639201	0.676194	0.745283	0.799794	0.8598
8.7	0.276935	0.381408	0.524935	0.638039	0.686381	0.753834	0.805123	0.870176
8.8	0.281963	0.385259	0.529511	0.644194	0.688233	0.755331	0.813423	0.872884
8.9	0.285938	0.392193	0.535044	0.655334	0.690583	0.761204	0.815479	0.874953
9	0.292663	0.396168	0.541264	0.658436	0.701611	0.766417	0.819377	0.878294
9.1	0.295974	0.40152	0.544282	0.65817	0.700596	0.766532	0.820229	0.882207
9.2	0.299674	0.407037	0.547951	0.663178	0.706611	0.770958	0.825292	0.884958
9.3	0.299991	0.408438	0.553203	0.674835	0.706858	0.778911	0.829513	0.882651
9.4	0.303969	0.409164	0.559446	0.669549	0.712735	0.778984	0.837848	0.894697
9.5	0.308132	0.419119	0.55715	0.68175	0.716258	0.784745	0.84504	0.895651
9.6	0.311366	0.418239	0.565802	0.680203	0.72134	0.789426	0.844114	0.905224
9.7	0.318404	0.426126	0.569305	0.691308	0.727703	0.799887	0.840985	0.90473
9.8	0.321414	0.427851	0.577736	0.692076	0.731967	0.795881	0.848143	0.902951
9.9	0.322074	0.433531	0.577258	0.691979	0.73789	0.803764	0.849366	0.899745
10	0.325172	0.437058	0.583042	0.698886	0.738958	0.808669	0.856346	0.908978
10.1	0.333067	0.440006	0.585643	0.70359	0.742813	0.81044	0.859202	0.91396
10.2	0.330466	0.440083	0.5892	0.714765	0.744924	0.807318	0.859364	0.909982
10.3	0.337076	0.450166	0.594599	0.711199	0.752178	0.810506	0.865503	0.923298
10.4	0.338998	0.452569	0.597373	0.716513	0.752086	0.823463	0.863666	0.926882
10.5	0.345515	0.457119	0.602173	0.718751	0.75704	0.818088	0.866371	0.92177
10.6	0.341409	0.462814	0.604118	0.722586	0.752124	0.817903	0.873618	0.927851
10.7	0.346646	0.46462	0.609096	0.728548	0.763959	0.826909	0.876801	0.929364
10.8	0.351558	0.470088	0.611978	0.730774	0.766513	0.829718	0.879791	0.934858
10.9	0.354201	0.473175	0.618387	0.73694	0.77026	0.826122	0.882894	0.936668
11	0.359372	0.473865	0.617901	0.735358	0.770117	0.829378	0.886232	0.935541
11.1	0.358044	0.478372	0.625009	0.739626	0.776021	0.841873	0.882041	0.939454
11.2	0.362918	0.481965	0.630465	0.745908	0.773671	0.838701	0.893247	0.945041
11.3	0.365754	0.485391	0.632541	0.745896	0.774624	0.841954	0.89031	0.948722
11.4	0.371866	0.487463	0.634906	0.750666	0.785965	0.841386	0.894261	0.945805
11.5	0.375493	0.493112	0.635261	0.755991	0.787767	0.847942	0.89462	0.948213
11.6	0.378514	0.493298	0.641651	0.754976	0.789499	0.847564	0.893474	0.949942
11.7	0.382824	0.500876	0.642446	0.761138	0.790614	0.854355	0.897086	0.949101
11.8	0.38392	0.502713	0.647312	0.759286	0.79428	0.85199	0.902469	0.951404
11.9	0.386255	0.506425	0.650538	0.765417	0.795133	0.852642	0.9015	0.955375
12	0.389998	0.506174	0.649137	0.765714	0.801951	0.860954	0.905154	0.951794
12.1	0.396279	0.511495	0.65844	0.770877	0.801905	0.859557	0.907188	0.958867
12.2	0.399613	0.512668	0.663746	0.776083	0.800396	0.865588	0.902585	0.957779
12.3	0.401527	0.517484	0.667782	0.773034	0.809587	0.860973	0.915777	0.958099
12.4	0.404533	0.522133	0.668766	0.773571	0.809032	0.865603	0.912046	0.957636
12.5	0.402862	0.523785	0.671197	0.77876	0.806037	0.866853	0.915824	0.964832
12.6	0.409553	0.527099	0.675488	0.782318	0.814356	0.86017	0.914909	0.9632
12.7	0.408724	0.528955	0.67729	0.782681	0.814117	0.86771	0.914735	0.96156
12.8	0.410908	0.531012	0.677938	0.787693	0.814847	0.865939	0.915484	0.96276
12.9	0.413879	0.530989	0.68165	0.789885	0.814766	0.873799	0.917085	0.968517
13	0.418525	0.539069	0.684347	0.790579	0.82124	0.872526	0.917818	0.973719
13.1	0.417135	0.536827	0.685427	0.796896	0.820696	0.873861	0.920319	0.974487
13.2	0.422595	0.541731	0.686242	0.793362	0.826129	0.879344	0.925729	0.970153
13.3	0.428268	0.547616	0.690409	0.794338	0.823347	0.880154	0.925165	0.975567
13.4	0.432319	0.555615	0.691945	0.801804	0.82721	0.882736	0.928874	0.973379
13.5	0.432254	0.549314	0.695626	0.798343	0.823544	0.879622	0.923815	0.974656
13.6	0.435939	0.554052	0.697231	0.800944	0.828796	0.880343	0.923039	0.97924
13.7	0.438528	0.557417	0.695792	0.803498	0.828182	0.88938	0.929784	0.980197
13.8	0.442714	0.560095	0.702676	0.808707	0.835969	0.885896	0.929425	0.982134
13.9	0.442495	0.561881	0.704485	0.807793	0.837466	0.885846	0.930066	0.982451
14	0.443004	0.566295	0.703887	0.811381	0.837285	0.888717	0.938057	0.976879
14.1	0.444447	0.564567	0.712874	0.813326	0.840881	0.883824	0.93717	0.984276
14.2	0.449915	0.571084	0.708367	0.819014	0.838843	0.896912	0.934094	0.977427
14.3	0.45478	0.570359	0.716007	0.813199	0.84146	0.89354	0.940241	0.978835
14.4	0.453048	0.575907	0.717728	0.815337	0.843377	0.891109	0.934469	0.984658
14.5	0.457578	0.575228	0.712434	0.822209	0.840445	0.893833	0.929533	0.983948
14.6	0.455193	0.58325	0.716355	0.818705	0.842428	0.894782	0.939766	0.984998
14.7	0.462359	0.584103	0.720433	0.818416	0.846534	0.893914	0.944127	0.978168
14.8	0.462309	0.586318	0.720094	0.824636	0.848286	0.893555	0.93999	0.982578
14.9	0.465423	0.582517	0.728	0.823683	0.847097	0.896631	0.945759	0.983331
15	0.468185	0.591168	0.721996	0.826639	0.850161	0.898186	0.942294	0.981583
15.1	0.467479	0.592013	0.722806	0.828035	0.851373	0.898919	0.946558	0.985376
15.2	0.476979	0.593136	0.730693	0.829336	0.850007	0.900482	0.947164	0.991094
15.3	0.479063	0.593657	0.729262	0.834506	0.85138	0.90446	0.94621	0.982756
15.4	0.476698	0.597643	0.734479	0.830293	0.85297	0.903476	0.944073	0.989547
15.5	0.482262	0.60176	0.737936	0.838319	0.856609	0.902635	0.942707	0.989485
15.6	0.482057	0.602119	0.739433	0.838346	0.857982	0.90823	0.943093	0.988513
15.7	0.485762	0.603894	0.738214	0.834769	0.861494	0.905691	0.945416	0.986661
15.8	0.483875	0.604218	0.737955	0.832288	0.858584	0.901998	0.942556	0.992746
15.9	0.484106	0.608166	0.742192	0.835625	0.859279	0.907473	0.946129	0.992379
16	0.491168	0.604627	0.747945	0.839951	0.865692	0.906258	0.941943	0.992877
16.1	0.490083	0.608918	0.743512	0.837717	0.86279	0.90941	0.947526	0.990816
16.2	0.491573	0.616431	0.741243	0.840213	0.868652	0.910201	0.945705	0.988459
16.3	0.497801	0.614467	0.746572	0.839214	0.864141	0.90201	0.948244	1
16.4	0.500174	0.616473	0.745858	0.839986	0.864646	0.904657	0.948888	0.986819
16.5	0.499398	0.622396	0.746857	0.842258	0.864071	0.912613	0.952458	0.987432
16.6	0.499576	0.621439	0.745838	0.843756	0.87055	0.907223	0.949043	0.985569
16.7	0.504966	0.624171	0.747718	0.84636	0.869612	0.907335	0.954441	0.98891
16.8	0.504839	0.623222	0.753455	0.846781	0.86722	0.90943	0.94682	0.988636
16.9	0.50656	0.629207	0.755875	0.844612	0.865893	0.910144	0.95196	0.986093
17	0.508991	0.629566	0.75449	0.849763	0.864689	0.91193	0.949517	0.990176
17.1	0.51163	0.631078	0.751086	0.845982	0.869875	0.908048	0.947248	0.989007
17.2	0.511831	0.6318	0.755697	0.853726	0.872398	0.911151	0.951886	0.99028
17.3	0.516554	0.629458	0.751542	0.849887	0.872059	0.912532	0.946739	0.98778
17.4	0.522372	0.632016	0.760756	0.85172	0.877758	0.912582	0.948703	0.989504
17.5	0.520983	0.631719	0.757206	0.850211	0.873942	0.917483	0.944995	0.989431
17.6	0.521709	0.636689	0.761952	0.848108	0.870936	0.915179	0.94623	0.985573
17.7	0.522353	0.63648	0.760285	0.852434	0.874285	0.918841	0.952681	0.98602
17.8	0.524869	0.639556	0.759101	0.858418	0.874933	0.911116	0.951327	0.988459
17.9	0.525876	0.635064	0.762234	0.856485	0.873953	0.914909	0.954908	0.985314
18	0.532683	0.644375	0.765811	0.857473	0.872931	0.911101	0.94743	0.985823
18.1	0.530931	0.644113	0.762334	0.853263	0.873494	0.910896	0.951358	0.989921
18.2	0.533269	0.644302	0.768134	0.855814	0.875331	0.912841	0.951983	0.988509
18.3	0.532532	0.644256	0.76845	0.860409	0.877372	0.915642	0.949371	0.983929
18.4	0.53766	0.646856	0.764885	0.854799	0.879938	0.911845	0.94907	0.9869
18.5	0.540277	0.649241	0.775766	0.857164	0.876153	0.917641	0.949348	0.981104
18.6	0.538814	0.646401	0.768844	0.859252	0.880339	0.915797	0.950895	0.986375
18.7	0.540516	0.650742	0.775805	0.860475	0.873162	0.911367	0.953364	0.987911
18.8	0.543556	0.654933	0.770017	0.864882	0.874768	0.915117	0.953881	0.984863
18.9	0.544984	0.656711	0.76808	0.862447	0.875694	0.913088	0.949243	0.985916
19	0.545239	0.6544	0.770229	0.863045	0.880741	0.908604	0.95164	0.984959
19.1	0.547843	0.655214	0.770719	0.864002	0.882624	0.914454	0.94883	0.983396
19.2	0.545397	0.658602	0.774489	0.866815	0.879305	0.913528	0.947924	0.989968
19.3	0.54946	0.662781	0.775832	0.860132	0.875844	0.912891	0.953932	0.984338
19.4	0.550625	0.661643	0.77119	0.862119	0.877723	0.915704	0.948908	0.975054
19.5	0.552979	0.661048	0.77271	0.863786	0.881979	0.908276	0.947152	0.979966
19.6	0.553365	0.66375	0.772259	0.855798	0.877106	0.914905	0.947901	0.977728
19.7	0.553342	0.663009	0.774555	0.860309	0.875898	0.912887	0.948348	0.98291
19.8	0.55896	0.661226	0.775573	0.865785	0.876577	0.91472	0.950223	0.976636
19.9	0.556965	0.664429	0.77741	0.86646	0.878059	0.910788	0.944486	0.980795
20	0.556626	0.666952	0.771282	0.864708	0.877114	0.907828	0.944601	0.984982
20.1	0.559091	0.667091	0.776596	0.868277	0.884954	0.914701	0.948811	0.980309
20.2	0.558482	0.676614	0.781492	0.867467	0.88115	0.908222	0.943772	0.977956
20.3	0.564193	0.668611	0.78351	0.867397	0.879066	0.914141	0.946261	0.977489
20.4	0.565894	0.670506	0.784653	0.86423	0.878896	0.911085	0.945088	0.976844
20.5	0.562097	0.672868	0.778911	0.863925	0.872699	0.914265	0.944617	0.975158
20.6	0.564513	0.673736	0.776762	0.864731	0.878715	0.906721	0.940125	0.978608
20.7	0.566164	0.67122	0.778286	0.862049	0.87775	0.91489	0.944007	0.976867
20.8	0.566616	0.674893	0.784703	0.861664	0.874964	0.920095	0.944543	0.975575
20.9	0.568437	0.677764	0.78894	0.867525	0.876562	0.905347	0.938821	0.974251
21	0.571177	0.675904	0.784722	0.868964	0.872456	0.910695	0.942375	0.970531
21.1	0.568016	0.677506	0.784977	0.860757	0.879849	0.91129	0.939662	0.966912
21.2	0.572983	0.680504	0.779891	0.863601	0.877341	0.909194	0.939462	0.975467
21.3	0.574792	0.682487	0.784938	0.864615	0.883828	0.910066	0.937636	0.970821
21.4	0.579473	0.679913	0.790024	0.867212	0.885406	0.914585	0.94246	0.970342
21.5	0.576799	0.679906	0.785953	0.86494	0.874926	0.906034	0.941198	0.972742
21.6	0.579619	0.68175	0.787022	0.866784	0.875817	0.9038	0.941468	0.974903
21.7	0.579905	0.682526	0.781396	0.861505	0.87398	0.905452	0.943351	0.964832
21.8	0.576984	0.677027	0.786393	0.863157	0.879047	0.909758	0.937559	0.970335
21.9	0.584119	0.684166	0.786277	0.861038	0.877627	0.906084	0.93458	0.967992
22	0.584512	0.685578	0.787986	0.864959	0.879714	0.908812	0.937822	0.964273
22.1	0.582772	0.68447	0.786609	0.869794	0.881262	0.904738	0.938374	0.965851
22.2	0.583497	0.685061	0.787755	0.868015	0.879795	0.907813	0.934542	0.967136
22.3	0.582992	0.682341	0.787188	0.858303	0.87978	0.904965	0.933797	0.966623
22.4	0.59057	0.689332	0.789314	0.86962	0.874713	0.908731	0.933222	0.962486
22.5	0.584809	0.68726	0.789542	0.871329	0.876407	0.910591	0.940145	0.955016
22.6	0.585346	0.68518	0.790626	0.863168	0.874833	0.902114	0.937397	0.956768
22.7	0.587151	0.6854	0.791116	0.867448	0.867625	0.9051	0.928252	0.961332
22.8	0.589224	0.691204	0.793084	0.871823	0.874972	0.905675	0.934276	0.960997
22.9	0.595216	0.687557	0.790421	0.865669	0.876967	0.900439	0.933851	0.960923
23	0.590767	0.687669	0.791625	0.868351	0.873189	0.899868	0.927681	0.965504
23.1	0.590289	0.690914	0.789966	0.862952	0.87182	0.904012	0.93007	0.963104
23.2	0.592897	0.688252	0.79178	0.863574	0.87077	0.901724	0.931235	0.957497
23.3	0.60095	0.688611	0.793794	0.862798	0.871847	0.899555	0.929788	0.954607
23.4	0.597226	0.69059	0.788727	0.86546	0.872229	0.905251	0.928345	0.954684
23.5	0.595154	0.692651	0.792436	0.864071	0.874227	0.902399	0.923695	0.954653
23.6	0.599715	0.689193	0.786663	0.860741	0.877631	0.902615	0.926362	0.959874
23.7	0.594595	0.693068	0.790549	0.863296	0.874868	0.897916	0.928874	0.9536
23.8	0.598203	0.692049	0.789704	0.859514	0.874733	0.898815	0.923591	0.953816
23.9	0.596524	0.693307	0.789777	0.86193	0.874987	0.895562	0.925069	0.957018
24	0.597543	0.699488	0.789268	0.862235	0.873224	0.899382	0.926084	0.955251
24.1	0.601795	0.69678	0.793913	0.860606	0.871202	0.896156	0.929726	0.955718
24.2	0.604473	0.692354	0.79068	0.866954	0.872989	0.897121	0.923792	0.953515
24.3	0.600491	0.695715	0.792293	0.858712	0.876377	0.903611	0.92422	0.953993
24.4	0.600016	0.697285	0.797151	0.863292	0.870427	0.898456	0.918976	0.9538
24.5	0.604076	0.697142	0.787778	0.861119	0.872414	0.898031	0.917872	0.943961
24.6	0.606881	0.694426	0.792181	0.859877	0.86832	0.895118	0.919968	0.947951
24.7	0.606742	0.698049	0.793068	0.858955	0.871843	0.889002	0.924197	0.949618
24.8	0.606642	0.695228	0.792628	0.855331	0.870886	0.890584	0.920979	0.941144
24.9	0.604319	0.701155	0.790035	0.861366	0.872761	0.892695	0.920832	0.947588
25	0.606603	0.69869	0.792439	0.854467	0.866934	0.89403	0.924421	0.946727
25.1	0.610631	0.694445	0.788233	0.856887	0.868042	0.890623	0.916919	0.939558
25.2	0.607197	0.699677	0.787273	0.859954	0.870685	0.893034	0.912567	0.940311
25.3	0.60876	0.697625	0.790136	0.858229	0.864592	0.887123	0.914504	0.941665
25.4	0.608567	0.700368	0.788808	0.85713	0.864203	0.88776	0.91085	0.942522
25.5	0.607988	0.704427	0.786729	0.854826	0.866707	0.887613	0.918714	0.942784
25.6	0.609061	0.695394	0.790232	0.85909	0.863296	0.891703	0.911	0.939238
25.7	0.607479	0.701391	0.790992	0.856084	0.861976	0.88656	0.910475	0.93367
25.8	0.609771	0.705404	0.787338	0.859537	0.860977	0.888848	0.916784	0.939577
25.9	0.612252	0.6984	0.789067	0.853966	0.86477	0.883554	0.91178	0.936718
26	0.614722	0.699623	0.78833	0.855517	0.86918	0.88715	0.908029	0.936587
26.1	0.614	0.702544	0.79105	0.853371	0.866066	0.884163	0.90708	0.931532
26.2	0.616477	0.701545	0.789391	0.856887	0.863242	0.888963	0.912798	0.936151
26.3	0.614891	0.706357	0.786107	0.855432	0.861058	0.886733	0.909287	0.935916
26.4	0.615594	0.703524	0.78691	0.854814	0.863099	0.880528	0.908257	0.939851
26.5	0.614718	0.706893	0.783943	0.858499	0.861586	0.883156	0.906682	0.935236
26.6	0.617754	0.704281	0.785008	0.850767	0.861224	0.881049	0.90326	0.929842
26.7	0.619761	0.702467	0.782932	0.854108	0.860502	0.883843	0.904907	0.926057
26.8	0.619356	0.704346	0.786347	0.85427	0.864804	0.881073	0.905058	0.932169
26.9	0.617612	0.706449	0.79036	0.852229	0.862358	0.872572	0.906929	0.931046
27	0.617712	0.701973	0.785363	0.857851	0.853661	0.876049	0.902708	0.929962
27.1	0.620347	0.699546	0.786439	0.849598	0.857527	0.874031	0.9062	0.931112
27.2	0.61706	0.699322	0.784923	0.845419	0.860116	0.876419	0.904402	0.924251
27.3	0.623307	0.70261	0.785748	0.845125	0.85799	0.874127	0.900887	0.930625
27.4	0.617971	0.698524	0.786188	0.851126	0.858496	0.878071	0.904865	0.925532
27.5	0.620841	0.704871	0.779544	0.847838	0.855594	0.868706	0.900721	0.926138
27.6	0.619668	0.706546	0.788592	0.849331	0.852619	0.872869	0.89768	0.930201
27.7	0.619348	0.705303	0.788237	0.846464	0.855054	0.873903	0.899988	0.921681
27.8	0.624214	0.703193	0.783009	0.843038	0.850836	0.869697	0.898842	0.920697
27.9	0.622393	0.708001	0.784051	0.846129	0.854471	0.872603	0.894593	0.914635
28	0.623508	0.7042	0.782858	0.848124	0.84976	0.869558	0.894474	0.919493
28.1	0.620112	0.706453	0.788816	0.842108	0.850821	0.866884	0.894775	0.920547
28.2	0.624889	0.704782	0.774967	0.847853	0.852206	0.86989	0.890866	0.91247
28.3	0.626267	0.7065	0.783973	0.844006	0.849706	0.867698	0.890075	0.917533
28.4	0.625302	0.704346	0.780524	0.847417	0.84242	0.862678	0.892309	0.917707
28.5	0.622852	0.700526	0.783028	0.845646	0.846889	0.869705	0.889782	0.912316
28.6	0.623593	0.704404	0.782372	0.843578	0.847946	0.866745	0.889724	0.916456
28.7	0.621243	0.700414	0.783287	0.843354	0.84477	0.865854	0.885969	0.913211
28.8	0.62389	0.705346	0.780497	0.844446	0.84697	0.864368	0.88441	0.911772
28.9	0.624943	0.703887	0.787767	0.842447	0.849972	0.864322	0.889345	0.908195
29	0.627316	0.705303	0.779598	0.839642	0.840518	0.86384	0.882589	0.913798
29.1	0.624515	0.705218	0.778556	0.842556	0.844107	0.858932	0.889322	0.909553
29.2	0.627498	0.70136	0.781434	0.838917	0.844149	0.860552	0.888697	0.905695
29.3	0.62837	0.702016	0.776696	0.837346	0.837848	0.859939	0.883094	0.908029
29.4	0.628821	0.702691	0.780273	0.836825	0.845407	0.861714	0.883781	0.907709
29.5	0.625966	0.702602	0.779443	0.839253	0.841386	0.855127	0.882323	0.90872
29.6	0.627077	0.705817	0.782002	0.837956	0.840549	0.859846	0.877476	0.904039
29.7	0.624322	0.704215	0.776214	0.840364	0.840159	0.856547	0.882666	0.906497
29.8	0.627652	0.702764	0.77565	0.834692	0.838735	0.86039	0.876944	0.907983
29.9	0.624048	0.699373	0.775963	0.835247	0.83681	0.86039	0.87966	0.901597

## Sheet: LDDD n=3
x correct	19	17.2667	15.5333	13.8	12.0666	10.3333	8.59996	6.86662
time	100	169.381	286.901	485.956	823.119	1394.21	2361.53	4000
0	0.00338063	0.00356466	0.00395793	0.00482767	0.00497136	0.00524867	0.005589	0.00643605
0.1	0.00369071	0.00400835	0.00427053	0.00569992	0.00557135	0.00632513	0.00700327	0.00861417
0.2	0.00373608	0.00432095	0.00485792	0.00706629	0.0076688	0.00833434	0.00928979	0.011473
0.3	0.00413944	0.00487556	0.00589656	0.00825619	0.0095318	0.0108755	0.0120553	0.0159426
0.4	0.00477977	0.00545035	0.00720747	0.0109814	0.0115713	0.0142813	0.0170569	0.0225829
0.5	0.00520581	0.00680663	0.00877047	0.0128393	0.0154637	0.0193611	0.0227417	0.0300298
0.6	0.00588648	0.00774443	0.0106209	0.0167317	0.0206821	0.0248896	0.029987	0.0396978
0.7	0.00637302	0.00916626	0.0130889	0.0197367	0.0249879	0.0321273	0.0372424	0.0496758
0.8	0.00710915	0.0101318	0.0148057	0.0238635	0.0299214	0.0391255	0.0469179	0.0616
0.9	0.00800914	0.0124334	0.0169737	0.0275341	0.0360928	0.046212	0.0560085	0.0725158
1	0.00919399	0.0131292	0.020067	0.0335088	0.0424608	0.0540699	0.0671512	0.086835
1.1	0.0103057	0.0150149	0.0226686	0.0380339	0.0496329	0.0630874	0.0776435	0.0999213
1.2	0.0119645	0.0171855	0.0269543	0.0426826	0.0571026	0.0724377	0.0893812	0.113608
1.3	0.0126402	0.0188619	0.0304307	0.0496077	0.0651067	0.0831165	0.102223	0.129508
1.4	0.0134822	0.0214358	0.0340508	0.055406	0.0745704	0.0941987	0.113305	0.143022
1.5	0.0152847	0.0235787	0.0377692	0.0621294	0.0814098	0.105099	0.127619	0.15742
1.6	0.0163586	0.0254946	0.0417221	0.0689209	0.090566	0.11542	0.138959	0.177038
1.7	0.0180779	0.0290416	0.0458338	0.0753267	0.0999113	0.126934	0.15321	0.191108
1.8	0.0194191	0.0313836	0.0496808	0.0814174	0.110583	0.138631	0.167002	0.208341
1.9	0.0212795	0.0346155	0.0553682	0.0905711	0.120354	0.149055	0.180169	0.22298
2	0.0239064	0.0372928	0.0584942	0.0967197	0.128976	0.159878	0.195479	0.242203
2.1	0.0252123	0.0405423	0.0645798	0.104457	0.140701	0.173309	0.210217	0.257911
2.2	0.0266946	0.0429171	0.0699091	0.111825	0.150275	0.183638	0.222955	0.272553
2.3	0.028908	0.046396	0.0750418	0.122106	0.162915	0.197733	0.237927	0.288515
2.4	0.0319937	0.0503565	0.0792115	0.128865	0.17336	0.210481	0.249939	0.307234
2.5	0.0332517	0.0521413	0.08564	0.138986	0.181666	0.221899	0.265786	0.322677
2.6	0.0337332	0.0549446	0.0931172	0.147921	0.193258	0.233838	0.279069	0.338196
2.7	0.0361936	0.0595782	0.098081	0.155428	0.204232	0.245525	0.294215	0.352846
2.8	0.0396549	0.0620084	0.102571	0.165368	0.214109	0.26086	0.309195	0.370321
2.9	0.0412684	0.0661731	0.109662	0.172699	0.226873	0.269598	0.321749	0.386735
3	0.0436834	0.069889	0.115776	0.182239	0.239677	0.283942	0.334264	0.400744
3.1	0.045491	0.0740965	0.122081	0.19145	0.249382	0.295637	0.347738	0.415736
3.2	0.0493808	0.0773939	0.127375	0.200322	0.261781	0.308829	0.366973	0.429201
3.3	0.0514733	0.0812586	0.134902	0.208278	0.271469	0.320549	0.375116	0.448164
3.4	0.0533463	0.0839812	0.139226	0.216297	0.281	0.338736	0.387398	0.465168
3.5	0.0562455	0.0893232	0.146441	0.226989	0.294092	0.345396	0.400011	0.472932
3.6	0.058648	0.0928172	0.155042	0.236241	0.303737	0.36053	0.412913	0.489777
3.7	0.0623563	0.0974054	0.157533	0.243289	0.315596	0.369703	0.429277	0.502032
3.8	0.0631227	0.102246	0.166609	0.254374	0.329824	0.378429	0.441138	0.514533
3.9	0.0652453	0.106415	0.172619	0.262882	0.338862	0.389087	0.454776	0.531918
4	0.0685831	0.111452	0.176897	0.27042	0.348575	0.402995	0.467169	0.544435
4.1	0.0720999	0.114775	0.185398	0.281426	0.356446	0.413256	0.477757	0.553717
4.2	0.0755107	0.118045	0.191113	0.287459	0.369537	0.421673	0.487652	0.567234
4.3	0.0785031	0.123994	0.195855	0.295975	0.377975	0.435589	0.497567	0.580235
4.4	0.0802149	0.126235	0.203652	0.307082	0.390368	0.443021	0.511554	0.5887
4.5	0.0834291	0.130652	0.210708	0.313123	0.398695	0.456223	0.520619	0.599049
4.6	0.0866207	0.136208	0.219761	0.320925	0.407735	0.463274	0.529495	0.612625
4.7	0.0888795	0.141727	0.224218	0.330923	0.418429	0.472216	0.543265	0.622222
4.8	0.0922475	0.144321	0.228998	0.339953	0.427676	0.484988	0.551514	0.633377
4.9	0.0957517	0.150074	0.236535	0.350242	0.43538	0.494035	0.561711	0.647172
5	0.0991978	0.154321	0.243418	0.357996	0.447322	0.50362	0.571732	0.652418
5.1	0.102437	0.159744	0.249907	0.364402	0.457943	0.513588	0.581571	0.660407
5.2	0.103824	0.16257	0.256416	0.370934	0.464169	0.517049	0.59496	0.674958
5.3	0.107489	0.166127	0.261508	0.381618	0.47231	0.529654	0.601338	0.682403
5.4	0.110933	0.172478	0.268385	0.388159	0.480969	0.539244	0.610913	0.688917
5.5	0.113353	0.176814	0.27709	0.395417	0.490725	0.547891	0.616051	0.69736
5.6	0.118266	0.182145	0.282846	0.407634	0.501089	0.559409	0.62204	0.709548
5.7	0.120898	0.185947	0.287752	0.41231	0.508634	0.564242	0.632006	0.71728
5.8	0.124365	0.190235	0.293734	0.423688	0.516636	0.571611	0.640073	0.725574
5.9	0.12653	0.194473	0.301816	0.430182	0.524484	0.582143	0.649577	0.731098
6	0.129092	0.198834	0.308255	0.437777	0.530284	0.589618	0.660599	0.743675
6.1	0.133468	0.205631	0.315442	0.441995	0.539294	0.596384	0.661998	0.747885
6.2	0.136927	0.210345	0.321518	0.450816	0.545758	0.604318	0.67011	0.758697
6.3	0.140307	0.212798	0.326199	0.456685	0.55351	0.615375	0.678997	0.766447
6.4	0.144616	0.218695	0.333744	0.465621	0.561688	0.616144	0.69047	0.770685
6.5	0.145972	0.223663	0.338075	0.470774	0.568787	0.626956	0.696628	0.778306
6.6	0.149937	0.229051	0.343528	0.478947	0.578612	0.631421	0.69888	0.785236
6.7	0.153114	0.232691	0.352899	0.487267	0.583913	0.638127	0.709896	0.792501
6.8	0.15621	0.237925	0.358697	0.49009	0.588978	0.643184	0.71365	0.792541
6.9	0.158421	0.24219	0.360772	0.501046	0.594842	0.651853	0.718536	0.807208
7	0.164418	0.244456	0.369421	0.509048	0.605016	0.656976	0.726149	0.808356
7.1	0.165736	0.250817	0.374627	0.513192	0.612786	0.659888	0.728899	0.813821
7.2	0.169367	0.257732	0.375988	0.521922	0.617258	0.672425	0.740758	0.81786
7.3	0.17337	0.257918	0.385505	0.525999	0.621493	0.676559	0.744774	0.828201
7.4	0.177885	0.263588	0.391628	0.528232	0.62412	0.679413	0.746604	0.83387
7.5	0.179874	0.267609	0.398901	0.537174	0.634333	0.691009	0.756774	0.837095
7.6	0.182952	0.273869	0.402479	0.546015	0.640638	0.695572	0.761221	0.842616
7.7	0.186915	0.277461	0.410132	0.550268	0.645241	0.695633	0.765761	0.850713
7.8	0.188471	0.280398	0.413828	0.556334	0.648374	0.702021	0.770637	0.852238
7.9	0.190734	0.286373	0.419709	0.561862	0.656648	0.708152	0.777476	0.856705
8	0.198048	0.289156	0.42277	0.566892	0.661864	0.712163	0.776952	0.859461
8.1	0.200095	0.296111	0.430151	0.569531	0.667768	0.720091	0.783726	0.867079
8.2	0.205981	0.298957	0.435975	0.572168	0.673078	0.721077	0.788624	0.873336
8.3	0.207247	0.307206	0.440492	0.584506	0.680454	0.727558	0.79209	0.880536
8.4	0.21118	0.309608	0.445998	0.58318	0.682559	0.729268	0.795904	0.881456
8.5	0.213158	0.312351	0.448318	0.592033	0.69047	0.740798	0.804665	0.885709
8.6	0.218521	0.317786	0.455533	0.598999	0.689839	0.740294	0.806729	0.882056
8.7	0.219804	0.320174	0.463983	0.603466	0.697738	0.745581	0.810299	0.893597
8.8	0.222206	0.326368	0.463595	0.606945	0.698945	0.750663	0.81404	0.89785
8.9	0.227936	0.328891	0.472047	0.611309	0.708507	0.754326	0.818127	0.90089
9	0.228075	0.334001	0.472242	0.61687	0.711172	0.756474	0.820739	0.906618
9.1	0.235406	0.338895	0.483379	0.622129	0.717026	0.762721	0.826862	0.905557
9.2	0.238209	0.339542	0.489725	0.627955	0.719179	0.766046	0.83294	0.909086
9.3	0.241199	0.343079	0.493672	0.635339	0.725496	0.768822	0.835406	0.909986
9.4	0.242677	0.350242	0.49493	0.634865	0.729268	0.771514	0.833641	0.918928
9.5	0.245987	0.353811	0.501258	0.638913	0.730523	0.777153	0.843218	0.923536
9.6	0.249914	0.360154	0.507074	0.64188	0.735517	0.778953	0.846853	0.925601
9.7	0.251578	0.358553	0.512774	0.647167	0.739001	0.783665	0.851915	0.924323
9.8	0.254946	0.365244	0.516908	0.651906	0.744814	0.785631	0.853264	0.931914
9.9	0.261468	0.372076	0.523836	0.65721	0.746546	0.788493	0.849198	0.932587
10	0.263076	0.373634	0.526947	0.661781	0.746158	0.790041	0.861051	0.933371
10.1	0.266502	0.376439	0.529992	0.661035	0.753822	0.795615	0.857991	0.937709
10.2	0.268943	0.381307	0.536315	0.666294	0.756378	0.800044	0.865917	0.938178
10.3	0.271426	0.385396	0.539511	0.671976	0.762577	0.798778	0.862698	0.940845
10.4	0.27731	0.388906	0.54272	0.676012	0.767077	0.805774	0.867341	0.945365
10.5	0.277126	0.392579	0.547772	0.681883	0.767289	0.807236	0.871085	0.943578
10.6	0.281807	0.399539	0.552898	0.682761	0.77168	0.808676	0.871975	0.946364
10.7	0.288021	0.397636	0.555812	0.686522	0.774474	0.808943	0.872113	0.952343
10.8	0.287114	0.404384	0.563476	0.690202	0.776687	0.815497	0.881466	0.955684
10.9	0.291228	0.407039	0.564171	0.696679	0.778764	0.818886	0.880201	0.958858
11	0.293396	0.41256	0.56635	0.699671	0.781865	0.815992	0.881242	0.95457
11.1	0.298133	0.416538	0.571722	0.701577	0.787958	0.823615	0.883672	0.961769
11.2	0.301118	0.419475	0.578148	0.707196	0.787716	0.822067	0.885235	0.959392
11.3	0.303195	0.420763	0.579441	0.708706	0.794367	0.822541	0.888086	0.966458
11.4	0.306805	0.423826	0.581629	0.7145	0.795718	0.823812	0.88975	0.965206
11.5	0.306634	0.430532	0.584097	0.714293	0.794614	0.829017	0.890728	0.962243
11.6	0.314711	0.432503	0.588806	0.714084	0.797737	0.830185	0.895243	0.96577
11.7	0.312071	0.436144	0.592492	0.718498	0.8026	0.837924	0.893509	0.968001
11.8	0.318003	0.438108	0.594196	0.725552	0.803752	0.83444	0.891331	0.969925
11.9	0.317461	0.439935	0.59642	0.727218	0.808613	0.838022	0.899285	0.970013
12	0.322899	0.447168	0.599508	0.728743	0.811119	0.837846	0.901538	0.972635
12.1	0.326345	0.450092	0.605082	0.733959	0.806251	0.838585	0.903648	0.973984
12.2	0.328259	0.452205	0.608601	0.733899	0.813188	0.846173	0.904518	0.974929
12.3	0.333863	0.452694	0.612072	0.739745	0.81526	0.843957	0.906709	0.974261
12.4	0.33561	0.4546	0.615246	0.742402	0.818205	0.841136	0.90506	0.978564
12.5	0.340528	0.45791	0.61625	0.740877	0.821026	0.848626	0.905809	0.977044
12.6	0.344325	0.464598	0.621977	0.74548	0.820764	0.844332	0.908584	0.981226
12.7	0.342043	0.466501	0.621503	0.745956	0.825967	0.850695	0.911579	0.980939
12.8	0.348051	0.46877	0.629152	0.743312	0.829713	0.847403	0.914209	0.979444
12.9	0.350791	0.471175	0.628534	0.750736	0.829204	0.851656	0.914751	0.981325
13	0.354099	0.473522	0.62676	0.747638	0.827361	0.852243	0.915739	0.983165
13.1	0.357815	0.479008	0.63106	0.749995	0.832078	0.852936	0.91616	0.984877
13.2	0.356476	0.480377	0.638812	0.752766	0.830901	0.857411	0.917947	0.990803
13.3	0.36086	0.478925	0.642075	0.754273	0.828392	0.856052	0.915923	0.98375
13.4	0.365347	0.483679	0.639796	0.759794	0.833099	0.855667	0.917597	0.99041
13.5	0.367886	0.490672	0.641785	0.761576	0.841035	0.861062	0.913846	0.985121
13.6	0.368345	0.49037	0.643501	0.759214	0.835373	0.861281	0.920567	0.988227
13.7	0.37227	0.49218	0.645559	0.767327	0.838214	0.860699	0.925818	0.991386
13.8	0.376722	0.495714	0.650316	0.765028	0.838731	0.863043	0.926388	0.991472
13.9	0.375943	0.497096	0.653943	0.768945	0.846354	0.863303	0.924535	0.99035
14	0.37766	0.500224	0.65721	0.768073	0.844595	0.861114	0.923045	0.994953
14.1	0.381244	0.500154	0.659787	0.773985	0.843029	0.86778	0.922825	0.991109
14.2	0.384398	0.505768	0.661952	0.774648	0.846899	0.864838	0.921913	0.989558
14.3	0.385518	0.510036	0.660561	0.778948	0.845984	0.863363	0.9294	0.996277
14.4	0.391265	0.510041	0.663984	0.779788	0.847189	0.872277	0.920085	0.99311
14.5	0.388712	0.512207	0.667241	0.780983	0.844942	0.86985	0.926123	0.997799
14.6	0.393151	0.517095	0.66822	0.784305	0.844171	0.86924	0.9222	0.99124
14.7	0.396675	0.515073	0.669795	0.782087	0.849465	0.867029	0.924235	0.990004
14.8	0.399703	0.518534	0.670186	0.782105	0.850731	0.870155	0.922967	0.992639
14.9	0.404042	0.522429	0.673531	0.790802	0.850514	0.86721	0.93029	0.997398
15	0.400346	0.526957	0.677179	0.79025	0.85577	0.876003	0.929907	0.996095
15.1	0.408037	0.525643	0.678568	0.787449	0.853637	0.87259	0.926967	0.995263
15.2	0.407301	0.528212	0.678863	0.793028	0.858193	0.877234	0.931374	0.994585
15.3	0.412096	0.530468	0.679793	0.788417	0.857948	0.877145	0.928702	0.993077
15.4	0.413233	0.533068	0.68144	0.790557	0.855866	0.875013	0.924323	0.990892
15.5	0.414352	0.534706	0.682614	0.7915	0.857905	0.877082	0.930421	0.991746
15.6	0.414809	0.535266	0.684011	0.793958	0.859055	0.871907	0.926377	0.997537
15.7	0.419919	0.539289	0.68957	0.792713	0.860729	0.874851	0.929561	0.9937
15.8	0.419513	0.541445	0.690744	0.793187	0.861848	0.87683	0.931298	0.99643
15.9	0.42182	0.54241	0.689323	0.796245	0.862844	0.877375	0.924799	0.993546
16	0.425157	0.542047	0.689623	0.794364	0.858745	0.878449	0.930492	1
16.1	0.426209	0.547382	0.693455	0.799217	0.86297	0.881058	0.927976	0.990292
16.2	0.429602	0.548246	0.694423	0.796767	0.858843	0.880846	0.929907	0.992049
16.3	0.43153	0.549547	0.697922	0.801695	0.860184	0.88373	0.925765	0.993203
16.4	0.432652	0.554718	0.69744	0.797089	0.857729	0.881643	0.931977	0.993093
16.5	0.437374	0.55674	0.697954	0.799857	0.862327	0.879528	0.931611	0.992258
16.6	0.435584	0.555096	0.701224	0.803808	0.866996	0.882676	0.922712	0.991005
16.7	0.441276	0.557176	0.698975	0.800356	0.862103	0.884728	0.929309	0.992672
16.8	0.440573	0.556551	0.704668	0.800503	0.86299	0.881711	0.92635	0.987231
16.9	0.445401	0.563715	0.70609	0.801254	0.860935	0.881076	0.928296	0.990637
17	0.445522	0.56643	0.700289	0.809689	0.861177	0.878229	0.925346	0.988058
17.1	0.447725	0.566234	0.704489	0.801892	0.862385	0.876944	0.926773	0.989253
17.2	0.448819	0.567096	0.707396	0.807584	0.86714	0.875534	0.92607	0.990869
17.3	0.453249	0.570204	0.709047	0.808572	0.866192	0.881492	0.924131	0.987065
17.4	0.455031	0.569874	0.710822	0.810582	0.863174	0.882737	0.927603	0.985144
17.5	0.451244	0.573665	0.712352	0.809351	0.864084	0.876906	0.926254	0.989049
17.6	0.457653	0.571238	0.715828	0.816092	0.865685	0.883685	0.921638	0.987322
17.7	0.458235	0.571069	0.716627	0.813675	0.856367	0.878502	0.927499	0.98797
17.8	0.460877	0.576796	0.718818	0.819735	0.86383	0.880445	0.924981	0.984385
17.9	0.460943	0.575082	0.712052	0.81669	0.865133	0.882144	0.922493	0.985774
18	0.463088	0.578821	0.717737	0.818661	0.870074	0.878789	0.92396	0.988068
18.1	0.464646	0.580616	0.720152	0.821472	0.861074	0.880465	0.923592	0.982015
18.2	0.467205	0.584458	0.720121	0.820981	0.863804	0.878789	0.921978	0.982487
18.3	0.4651	0.584218	0.719138	0.817305	0.867528	0.88015	0.91616	0.983503
18.4	0.471387	0.588166	0.718442	0.82481	0.865372	0.879737	0.92734	0.981529
18.5	0.471934	0.584881	0.72082	0.820802	0.864155	0.88191	0.923932	0.981163
18.6	0.473477	0.585968	0.721402	0.823665	0.862511	0.876114	0.917637	0.979005
18.7	0.475345	0.588733	0.723835	0.82783	0.866214	0.8768	0.923128	0.979048
18.8	0.477972	0.591733	0.725272	0.824835	0.863711	0.875189	0.918663	0.980281
18.9	0.478383	0.591237	0.721979	0.825591	0.865009	0.87925	0.917168	0.977697
19	0.479699	0.588786	0.724301	0.826456	0.863444	0.880682	0.913324	0.975133
19.1	0.479643	0.595565	0.731451	0.826716	0.863033	0.877123	0.916077	0.97721
19.2	0.482088	0.593453	0.724475	0.825339	0.866772	0.874589	0.917216	0.972095
19.3	0.483488	0.601618	0.729714	0.826844	0.863436	0.882823	0.915996	0.974024
19.4	0.484171	0.597181	0.731589	0.824167	0.866734	0.876094	0.916906	0.974193
19.5	0.487231	0.598742	0.728962	0.824149	0.864674	0.875451	0.915293	0.972509
19.6	0.490869	0.599735	0.725196	0.822445	0.8672	0.872136	0.914824	0.975473
19.7	0.492298	0.60423	0.730677	0.827263	0.864009	0.870162	0.911544	0.971173
19.8	0.490304	0.599304	0.72862	0.825604	0.866625	0.871357	0.91255	0.97351
19.9	0.493993	0.604078	0.730866	0.825649	0.863225	0.878323	0.913687	0.96911
20	0.492722	0.606667	0.730873	0.830739	0.862632	0.873707	0.913072	0.96909
20.1	0.492929	0.603562	0.7341	0.827006	0.866096	0.873409	0.909187	0.967747
20.2	0.496914	0.605183	0.733404	0.830291	0.866129	0.869396	0.915026	0.968021
20.3	0.499985	0.608856	0.736893	0.8248	0.86715	0.873404	0.914763	0.963519
20.4	0.496763	0.610093	0.733208	0.829862	0.866371	0.874725	0.91168	0.966209
20.5	0.503852	0.605969	0.735777	0.828329	0.863351	0.873434	0.911345	0.962327
20.6	0.501924	0.612589	0.737549	0.827517	0.863192	0.870694	0.909321	0.961232
20.7	0.503925	0.612713	0.736268	0.826726	0.863275	0.871647	0.907616	0.961124
20.8	0.506678	0.613179	0.734125	0.830316	0.864992	0.872577	0.905274	0.962773
20.9	0.508607	0.614142	0.7392	0.832673	0.864621	0.870329	0.906144	0.958865
21	0.507611	0.614924	0.739777	0.827457	0.860272	0.869396	0.907722	0.953274
21.1	0.508423	0.617283	0.736241	0.826559	0.860968	0.872633	0.907858	0.956322
21.2	0.509507	0.61512	0.736137	0.828274	0.861122	0.867432	0.900222	0.954774
21.3	0.507949	0.618761	0.7392	0.827412	0.864367	0.869378	0.901153	0.954017
21.4	0.510341	0.616598	0.739813	0.827263	0.857676	0.868856	0.901846	0.957857
21.5	0.511609	0.619701	0.741464	0.827054	0.857305	0.867382	0.904218	0.954968
21.6	0.51197	0.61814	0.741328	0.828319	0.857857	0.868708	0.903898	0.953337
21.7	0.51377	0.625845	0.742548	0.826358	0.860699	0.861568	0.902655	0.951209
21.8	0.517826	0.621115	0.740977	0.826668	0.856133	0.863404	0.904879	0.95071
21.9	0.51834	0.624229	0.740047	0.825665	0.854177	0.86721	0.900472	0.948565
22	0.518892	0.625393	0.743118	0.831059	0.858772	0.860716	0.896751	0.947027
22.1	0.51864	0.622817	0.738257	0.828838	0.858256	0.860469	0.898881	0.949502
22.2	0.519442	0.623616	0.740955	0.822453	0.855886	0.861911	0.895659	0.943699
22.3	0.521554	0.625076	0.742377	0.824112	0.855367	0.8615	0.89327	0.945698
22.4	0.52071	0.625245	0.741114	0.825697	0.855294	0.858334	0.899022	0.94503
22.5	0.521721	0.627511	0.740798	0.825841	0.854494	0.859889	0.895992	0.941866
22.6	0.520763	0.62292	0.746254	0.824286	0.848142	0.860847	0.893161	0.942779
22.7	0.52641	0.626926	0.742452	0.825486	0.853158	0.859851	0.890837	0.940008
22.8	0.527496	0.625295	0.746695	0.826393	0.849213	0.856335	0.893504	0.93993
22.9	0.52615	0.627584	0.743405	0.827069	0.848426	0.85786	0.890166	0.937392
23	0.527905	0.627198	0.744164	0.825175	0.851227	0.857391	0.889579	0.939055
23.1	0.529785	0.626974	0.744497	0.822221	0.849642	0.856264	0.891114	0.943591
23.2	0.532337	0.630415	0.745314	0.817338	0.849157	0.852548	0.891275	0.937515
23.3	0.528759	0.630405	0.74489	0.819891	0.850857	0.853504	0.887857	0.935884
23.4	0.531462	0.62978	0.744792	0.820744	0.849662	0.856917	0.88372	0.937124
23.5	0.532725	0.630443	0.747366	0.819327	0.847577	0.852563	0.888364	0.934908
23.6	0.5327	0.633218	0.750759	0.816559	0.850703	0.852102	0.886024	0.936154
23.7	0.533814	0.631993	0.745455	0.818865	0.846644	0.853113	0.881837	0.935334
23.8	0.536884	0.632061	0.744461	0.816851	0.845563	0.855263	0.882041	0.928384
23.9	0.534951	0.628376	0.740579	0.820612	0.847116	0.850524	0.880518	0.926493
24	0.53601	0.633395	0.743294	0.81759	0.852175	0.848013	0.878789	0.928014
24.1	0.535654	0.636319	0.746619	0.821318	0.84885	0.845348	0.882323	0.928669
24.2	0.536557	0.633718	0.748132	0.813027	0.848104	0.846579	0.876666	0.92521
24.3	0.540489	0.632984	0.747103	0.817323	0.843667	0.846911	0.881991	0.927729
24.4	0.541069	0.63699	0.745487	0.81607	0.846463	0.843422	0.876606	0.925735
24.5	0.537073	0.632691	0.745064	0.819188	0.848613	0.845661	0.876051	0.921779
24.6	0.540608	0.633375	0.748987	0.813521	0.842326	0.843006	0.875187	0.916891
24.7	0.538372	0.636526	0.742886	0.816602	0.840342	0.845489	0.872325	0.91737
24.8	0.54091	0.636501	0.743294	0.812104	0.844532	0.843803	0.875744	0.918396
24.9	0.542055	0.638674	0.748213	0.812924	0.843405	0.84255	0.875857	0.919677
25	0.54602	0.640738	0.744961	0.814176	0.840072	0.842348	0.871304	0.917357
25.1	0.543179	0.637802	0.744184	0.811048	0.838569	0.839192	0.872688	0.911978
25.2	0.546441	0.636559	0.74607	0.812845	0.840153	0.840997	0.868183	0.920637
25.3	0.545957	0.639032	0.748213	0.812578	0.836091	0.839227	0.870984	0.914801
25.4	0.542486	0.641066	0.744282	0.811388	0.841284	0.841201	0.872638	0.913039
25.5	0.54264	0.641217	0.749435	0.809278	0.83919	0.840579	0.86713	0.908189
25.6	0.54928	0.639433	0.744716	0.806119	0.839205	0.836633	0.869477	0.912154
25.7	0.54656	0.638351	0.746556	0.809707	0.835335	0.835958	0.867994	0.908743
25.8	0.550004	0.640804	0.744945	0.808792	0.833006	0.83409	0.86805	0.909157
25.9	0.551282	0.639992	0.742966	0.810405	0.834546	0.834927	0.863787	0.906474
26	0.546348	0.641891	0.743403	0.809034	0.833943	0.83509	0.863449	0.903016
26.1	0.549769	0.638263	0.744325	0.811519	0.831153	0.833359	0.861064	0.908264
26.2	0.549507	0.640882	0.742238	0.806994	0.830215	0.828523	0.86452	0.904195
26.3	0.549275	0.641043	0.743014	0.804667	0.82812	0.825919	0.860207	0.90358
26.4	0.551231	0.645465	0.743042	0.810123	0.828362	0.828881	0.856632	0.90053
26.5	0.551022	0.644149	0.74399	0.810246	0.830217	0.826186	0.856975	0.899315
26.6	0.555469	0.643983	0.744262	0.809142	0.826771	0.830691	0.857908	0.900928
26.7	0.552547	0.643093	0.743894	0.803795	0.824202	0.826239	0.861346	0.899237
26.8	0.553298	0.641888	0.742344	0.804408	0.824845	0.820953	0.85577	0.89541
26.9	0.557113	0.645735	0.742908	0.802711	0.824767	0.823459	0.860159	0.895438
27	0.553961	0.643595	0.740375	0.802227	0.8251	0.825831	0.85483	0.897243
27.1	0.555121	0.646285	0.740922	0.802371	0.823353	0.823728	0.851237	0.895017
27.2	0.556727	0.642009	0.741893	0.794467	0.823887	0.825349	0.848021	0.890723
27.3	0.554337	0.642054	0.741008	0.802535	0.822813	0.818813	0.850206	0.888812
27.4	0.556011	0.641873	0.743269	0.799144	0.820945	0.822319	0.846546	0.88858
27.5	0.558124	0.64452	0.739667	0.79834	0.818298	0.820083	0.848318	0.890017
27.6	0.553422	0.642299	0.741199	0.798103	0.819894	0.81824	0.845953	0.887847
27.7	0.557113	0.641883	0.735812	0.797397	0.817232	0.813345	0.845298	0.88517
27.8	0.555217	0.644258	0.735177	0.799315	0.819715	0.81577	0.838171	0.886753
27.9	0.557622	0.644636	0.740632	0.792599	0.819072	0.814126	0.842653	0.887696
28	0.556677	0.646506	0.73623	0.798486	0.816496	0.815634	0.837816	0.879228
28.1	0.560027	0.642107	0.740209	0.802109	0.818364	0.81276	0.842104	0.880892
28.2	0.557178	0.64125	0.741048	0.795211	0.812934	0.812591	0.840263	0.88132
28.3	0.562992	0.644684	0.738255	0.794561	0.810334	0.811537	0.839409	0.878411
28.4	0.558219	0.643968	0.740587	0.796648	0.813423	0.803939	0.838012	0.879152
28.5	0.558421	0.645624	0.738126	0.794972	0.810425	0.81584	0.837274	0.875648
28.6	0.556979	0.645372	0.734322	0.792975	0.809107	0.808761	0.831438	0.873185
28.7	0.564608	0.643136	0.737201	0.794896	0.809951	0.805164	0.838032	0.875701
28.8	0.559656	0.645236	0.73826	0.789287	0.806914	0.809561	0.833943	0.873379
28.9	0.558638	0.645069	0.733803	0.790653	0.80708	0.809649	0.831112	0.871024
29	0.56188	0.648606	0.731405	0.789315	0.806535	0.805408	0.828145	0.867122
29.1	0.56161	0.64784	0.733233	0.786859	0.808759	0.803467	0.825846	0.869424
29.2	0.564308	0.644051	0.73557	0.785432	0.806311	0.804158	0.826655	0.870233
29.3	0.563493	0.640819	0.733813	0.785062	0.807566	0.800656	0.827676	0.866759
29.4	0.566735	0.643446	0.735066	0.78518	0.802018	0.799789	0.830606	0.866736
29.5	0.5628	0.645054	0.731204	0.785059	0.803203	0.802051	0.822246	0.865584
29.6	0.562772	0.646065	0.7359	0.784767	0.805124	0.796774	0.823534	0.863726
29.7	0.563075	0.643128	0.734962	0.78369	0.798337	0.792453	0.819024	0.864853
29.8	0.564996	0.643643	0.739949	0.784991	0.79778	0.795264	0.824117	0.861596
29.9	0.568119	0.644051	0.734052	0.780179	0.795524	0.797546	0.82274	0.86052

## Sheet: LDDD n=4
x correct	19	17.2667	15.5333	13.8	12.0666	10.3333	8.59996	6.86662
time	100	158.382	250.848	397.299	629.249	996.618	1578.46	2500
0	0.00194489	0.00296061	0.00301544	0.00372241	0.00465734	0.00597316	0.00711586	0.0104054
0.1	0.00263165	0.00365892	0.00361564	0.00529217	0.00651854	0.00890781	0.0100592	0.0138624
0.2	0.00349156	0.00481893	0.00507286	0.00702352	0.00813447	0.0115395	0.0135392	0.0193421
0.3	0.00413793	0.00629635	0.00647814	0.00909248	0.0111239	0.0149964	0.0179714	0.0243111
0.4	0.00543644	0.00757466	0.0083682	0.0117213	0.0144452	0.0190247	0.0217342	0.0300736
0.5	0.00628192	0.00922811	0.010264	0.0144914	0.0187477	0.0246804	0.0282961	0.0366816
0.6	0.00752561	0.0113779	0.0125927	0.0172616	0.0227875	0.0293637	0.0326966	0.0449805
0.7	0.00917328	0.0133026	0.0150628	0.02174	0.0270351	0.0356024	0.0403665	0.0541567
0.8	0.0104083	0.0159717	0.0180234	0.0260251	0.0329563	0.0424354	0.0481835	0.0620747
0.9	0.0124196	0.0176627	0.0210965	0.0309075	0.0384908	0.049482	0.057377	0.0713028
1	0.0137498	0.0201154	0.0243601	0.0342577	0.0459587	0.057957	0.0657077	0.0824066
1.1	0.0153109	0.0235724	0.0282528	0.03942	0.0519983	0.0640427	0.0746905	0.0925667
1.2	0.0174261	0.0258116	0.0316376	0.044894	0.0598096	0.0741682	0.0862127	0.104386
1.3	0.0195066	0.0293522	0.0350772	0.0502381	0.0661723	0.082926	0.0944683	0.117112
1.4	0.0219305	0.0322609	0.0389439	0.0558794	0.0735911	0.0918309	0.102837	0.127465
1.5	0.0244351	0.0357409	0.0432578	0.0624441	0.0799625	0.100946	0.117818	0.14279
1.6	0.0259212	0.0391228	0.0475083	0.0677045	0.0881085	0.11115	0.12623	0.15491
1.7	0.0286106	0.0433444	0.0526244	0.075888	0.0960035	0.121668	0.140193	0.167849
1.8	0.0322811	0.0456529	0.0567941	0.0803463	0.105376	0.132852	0.151678	0.182949
1.9	0.0348579	0.0498139	0.0605107	0.0872601	0.113646	0.141806	0.162646	0.195781
2	0.0373885	0.0530861	0.0668475	0.094578	0.121746	0.151828	0.1768	0.211992
2.1	0.0393132	0.0582946	0.0718165	0.102202	0.13186	0.163264	0.18986	0.225148
2.2	0.0430183	0.06159	0.0770625	0.108472	0.142929	0.173906	0.203402	0.241627
2.3	0.0461723	0.0680566	0.0831857	0.116462	0.152844	0.185615	0.216341	0.255014
2.4	0.0504314	0.0711845	0.0885673	0.123665	0.161333	0.198543	0.229811	0.267895
2.5	0.0513375	0.0758823	0.0950801	0.130749	0.169546	0.206348	0.240877	0.284923
2.6	0.0553571	0.0783956	0.100447	0.137824	0.18026	0.218499	0.254275	0.295242
2.7	0.0584793	0.0836993	0.103896	0.146426	0.189395	0.229508	0.267439	0.317449
2.8	0.0613678	0.0878719	0.111187	0.154237	0.202095	0.239472	0.279628	0.328582
2.9	0.0658058	0.0922233	0.117403	0.162568	0.209421	0.25233	0.294396	0.342811
3	0.0683076	0.0989525	0.123362	0.169921	0.220095	0.265064	0.304083	0.36041
3.1	0.0735911	0.101209	0.128259	0.178543	0.228787	0.275698	0.317966	0.373259
3.2	0.0764132	0.108414	0.133715	0.182101	0.236938	0.286406	0.328966	0.384761
3.3	0.0812235	0.114217	0.141489	0.192523	0.250278	0.29611	0.345405	0.397894
3.4	0.0827298	0.119501	0.147961	0.199002	0.260802	0.309041	0.359371	0.414797
3.5	0.0872861	0.123881	0.15246	0.210631	0.268455	0.324888	0.372489	0.430628
3.6	0.0907979	0.130677	0.159988	0.218909	0.283258	0.332246	0.383945	0.443593
3.7	0.0943183	0.133135	0.165636	0.225243	0.288792	0.342176	0.395343	0.453958
3.8	0.0987534	0.139071	0.17416	0.232515	0.300395	0.353337	0.412183	0.468437
3.9	0.102236	0.14436	0.177288	0.242733	0.307999	0.365428	0.422675	0.479045
4	0.105806	0.149684	0.185814	0.248974	0.318231	0.376364	0.431115	0.495986
4.1	0.10956	0.15437	0.191848	0.256422	0.329251	0.386192	0.440762	0.508937
4.2	0.113493	0.16026	0.196399	0.262969	0.336993	0.397051	0.456494	0.524346
4.3	0.117478	0.166542	0.206138	0.272532	0.349921	0.408244	0.46799	0.533551
4.4	0.122003	0.170971	0.211646	0.282228	0.358932	0.413828	0.475963	0.544923
4.5	0.12378	0.175891	0.221388	0.291147	0.364975	0.42758	0.48756	0.555328
4.6	0.129785	0.179939	0.223569	0.297065	0.373427	0.437117	0.500254	0.570544
4.7	0.133049	0.186553	0.232437	0.305601	0.382793	0.446628	0.513758	0.58329
4.8	0.136563	0.192916	0.240479	0.31003	0.393461	0.458615	0.517348	0.59362
4.9	0.138924	0.197351	0.244132	0.318681	0.40404	0.464452	0.533447	0.6023
5	0.14462	0.201821	0.247938	0.330717	0.411366	0.475822	0.545933	0.615646
5.1	0.149667	0.208631	0.25873	0.334431	0.417083	0.483823	0.551698	0.631173
5.2	0.153556	0.212414	0.264955	0.346028	0.425082	0.493352	0.560228	0.63798
5.3	0.157368	0.217588	0.271387	0.353649	0.43802	0.505064	0.571283	0.649009
5.4	0.166608	0.22593	0.278886	0.355851	0.441838	0.510691	0.582635	0.659016
5.5	0.166709	0.231519	0.282984	0.367021	0.450417	0.520369	0.588674	0.665058
5.6	0.170126	0.233978	0.290019	0.370483	0.459896	0.52943	0.599215	0.676491
5.7	0.172148	0.240401	0.294991	0.381443	0.468758	0.537097	0.610027	0.686796
5.8	0.179544	0.246715	0.303393	0.389719	0.478849	0.543722	0.617732	0.694099
5.9	0.181841	0.252633	0.308922	0.392229	0.487286	0.556407	0.622597	0.708005
6	0.18932	0.259662	0.315862	0.403994	0.491323	0.562557	0.632379	0.712448
6.1	0.192258	0.262854	0.320392	0.409162	0.501639	0.568406	0.644248	0.720603
6.2	0.194558	0.268435	0.325921	0.413975	0.504894	0.575963	0.648541	0.725875
6.3	0.200404	0.270183	0.334792	0.424089	0.515005	0.582756	0.660035	0.74118
6.4	0.204389	0.275842	0.337951	0.426995	0.522568	0.591577	0.664201	0.74552
6.5	0.206155	0.283939	0.344628	0.432399	0.530922	0.595074	0.672835	0.749658
6.6	0.212059	0.289061	0.350654	0.437718	0.535917	0.605211	0.683041	0.765367
6.7	0.215423	0.290206	0.357642	0.450048	0.545748	0.611877	0.688065	0.768576
6.8	0.220418	0.298485	0.361867	0.450351	0.548515	0.616615	0.69512	0.778358
6.9	0.22447	0.301281	0.36786	0.459931	0.55555	0.627517	0.699382	0.786934
7	0.227756	0.307713	0.373026	0.468738	0.559873	0.628772	0.708313	0.792679
7.1	0.232881	0.314887	0.381449	0.470786	0.564386	0.638433	0.715348	0.7904
7.2	0.23663	0.317019	0.384669	0.474737	0.57912	0.64301	0.719518	0.805203
7.3	0.242156	0.32599	0.389072	0.479307	0.580289	0.653326	0.72988	0.805552
7.4	0.246051	0.327142	0.39504	0.493874	0.587321	0.654125	0.731236	0.817236
7.5	0.250316	0.333326	0.403414	0.495239	0.589768	0.661333	0.73858	0.822704
7.6	0.251765	0.33918	0.407653	0.498055	0.596656	0.665255	0.747785	0.827932
7.7	0.256035	0.341388	0.411782	0.504271	0.604138	0.672783	0.748683	0.833112
7.8	0.262239	0.348293	0.416742	0.512082	0.608455	0.673343	0.757466	0.834734
7.9	0.266891	0.353106	0.421832	0.516852	0.613008	0.681532	0.762764	0.845884
8	0.266224	0.357068	0.427168	0.520271	0.619068	0.687693	0.765232	0.848299
8.1	0.27272	0.360147	0.43317	0.528019	0.622513	0.695646	0.773505	0.855181
8.2	0.275686	0.368446	0.432238	0.532119	0.630665	0.697622	0.772734	0.859994
8.3	0.280719	0.372414	0.441451	0.53783	0.635014	0.697241	0.781613	0.864126
8.4	0.283486	0.374186	0.447563	0.540791	0.638248	0.70402	0.787604	0.864856
8.5	0.286242	0.37839	0.453404	0.550166	0.640695	0.711502	0.794252	0.872754
8.6	0.289488	0.384025	0.454907	0.554263	0.64636	0.71757	0.793799	0.878222
8.7	0.293984	0.388911	0.462476	0.557374	0.654509	0.721385	0.798759	0.885659
8.8	0.297062	0.395045	0.465408	0.559273	0.658569	0.722444	0.803841	0.881803
8.9	0.304432	0.397937	0.470757	0.559807	0.657547	0.729257	0.808865	0.89596
9	0.303044	0.397743	0.475374	0.569266	0.664149	0.73027	0.810042	0.89439
9.1	0.30739	0.405387	0.482736	0.574212	0.670218	0.737498	0.814399	0.895311
9.2	0.310951	0.408235	0.484828	0.577865	0.671845	0.739654	0.819351	0.904152
9.3	0.314442	0.412402	0.487029	0.57927	0.676898	0.744366	0.82185	0.902981
9.4	0.320779	0.416347	0.494477	0.585627	0.679351	0.743044	0.827174	0.907254
9.5	0.323373	0.42273	0.496961	0.587889	0.683771	0.746654	0.825021	0.910936
9.6	0.324282	0.425194	0.501544	0.594679	0.682525	0.752815	0.836093	0.915726
9.7	0.328885	0.431043	0.508902	0.596878	0.692925	0.759423	0.840955	0.91961
9.8	0.33274	0.433986	0.510781	0.599489	0.694073	0.763249	0.840667	0.922418
9.9	0.334849	0.434347	0.512662	0.601977	0.69742	0.763933	0.847058	0.922652
10	0.341939	0.437784	0.519256	0.607765	0.7023	0.766221	0.847272	0.92969
10.1	0.34069	0.443714	0.520658	0.60651	0.70797	0.76799	0.849773	0.930893
10.2	0.347139	0.448712	0.522441	0.616003	0.709087	0.772751	0.85059	0.933565
10.3	0.351219	0.450599	0.526063	0.61757	0.712347	0.780009	0.85495	0.932838
10.4	0.354263	0.457758	0.532495	0.624395	0.712694	0.782291	0.860788	0.939509
10.5	0.358312	0.4574	0.534757	0.620087	0.719079	0.78387	0.863448	0.940903
10.6	0.357844	0.462242	0.542366	0.626282	0.717899	0.780802	0.863281	0.939521
10.7	0.361648	0.461985	0.541376	0.631187	0.722525	0.787878	0.864216	0.946097
10.8	0.364926	0.467526	0.545595	0.632434	0.724897	0.790674	0.869069	0.946429
10.9	0.370351	0.472108	0.550097	0.642046	0.726276	0.791952	0.870483	0.952454
11	0.370521	0.47308	0.550261	0.637285	0.729092	0.797135	0.873092	0.954454
11.1	0.37437	0.479166	0.555634	0.641899	0.734203	0.795908	0.87697	0.954803
11.2	0.377671	0.479596	0.559137	0.641977	0.735874	0.799253	0.877764	0.959345
11.3	0.38309	0.482332	0.561359	0.649566	0.74017	0.799374	0.878315	0.954737
11.4	0.381734	0.486213	0.566801	0.651808	0.745217	0.802626	0.881907	0.959726
11.5	0.386974	0.491597	0.571998	0.652858	0.74314	0.802591	0.8861	0.959362
11.6	0.387116	0.492925	0.566331	0.65794	0.749577	0.811834	0.890512	0.966807
11.7	0.392457	0.495288	0.575568	0.661333	0.748752	0.808847	0.890515	0.965084
11.8	0.391159	0.499403	0.576771	0.663673	0.748342	0.817034	0.894336	0.9632
11.9	0.393124	0.497622	0.577204	0.659913	0.750348	0.809303	0.894893	0.968267
12	0.401824	0.503541	0.584499	0.663644	0.750864	0.818156	0.893712	0.969958
12.1	0.405647	0.509372	0.582421	0.667961	0.756748	0.819218	0.897155	0.972803
12.2	0.405477	0.508201	0.588126	0.673614	0.754766	0.819388	0.904646	0.970405
12.3	0.404282	0.514584	0.589828	0.67405	0.761475	0.824556	0.899178	0.978326
12.4	0.41014	0.518494	0.591513	0.675513	0.762005	0.823572	0.897752	0.973689
12.5	0.410856	0.516211	0.597054	0.679342	0.757997	0.825861	0.8983	0.975271
12.6	0.414451	0.519382	0.598456	0.678029	0.767044	0.825376	0.909987	0.980667
12.7	0.417417	0.52492	0.603261	0.68159	0.769433	0.828299	0.906135	0.977498
12.8	0.419492	0.525725	0.606983	0.683344	0.770908	0.830192	0.909748	0.984057
12.9	0.422744	0.529214	0.604608	0.684911	0.769918	0.83308	0.905849	0.984265
13	0.425382	0.529067	0.608582	0.690001	0.773871	0.830206	0.909491	0.984173
13.1	0.42604	0.531179	0.612746	0.693135	0.775533	0.83261	0.911167	0.984929
13.2	0.427393	0.531736	0.612824	0.685682	0.774786	0.83304	0.910016	0.983004
13.3	0.42952	0.536243	0.613617	0.692968	0.778384	0.834038	0.914353	0.986213
13.4	0.432119	0.538006	0.614748	0.695354	0.776927	0.835992	0.908435	0.985555
13.5	0.436393	0.544048	0.618514	0.694979	0.781275	0.837117	0.917238	0.990108
13.6	0.441659	0.545786	0.62047	0.698494	0.782577	0.838326	0.914376	0.99016
13.7	0.439478	0.544784	0.622193	0.704972	0.780473	0.837735	0.914266	0.987748
13.8	0.441899	0.548963	0.621457	0.701697	0.780958	0.838514	0.917798	0.986394
13.9	0.444227	0.54986	0.626617	0.703108	0.785999	0.848134	0.915715	0.993401
14	0.446868	0.55053	0.62681	0.706573	0.787944	0.841232	0.919432	0.986911
14.1	0.447312	0.554936	0.632596	0.704461	0.787976	0.848074	0.91927	0.99072
14.2	0.449009	0.552694	0.627811	0.707188	0.788103	0.844568	0.921812	0.991153
14.3	0.450648	0.557513	0.63177	0.705939	0.787817	0.845517	0.922943	0.995724
14.4	0.456869	0.561578	0.63729	0.709084	0.792979	0.846475	0.921348	0.991759
14.5	0.456586	0.557556	0.638044	0.712492	0.795138	0.848914	0.927096	0.996647
14.6	0.457781	0.562897	0.638373	0.711739	0.794647	0.851075	0.923261	0.989647
14.7	0.461102	0.56685	0.641203	0.714962	0.797412	0.845232	0.923769	0.994307
14.8	0.461223	0.565162	0.639853	0.716832	0.795871	0.848244	0.929906	0.994641
14.9	0.464112	0.572264	0.643766	0.716474	0.795585	0.848212	0.928085	0.99766
15	0.467456	0.57581	0.644796	0.720242	0.79244	0.850521	0.923402	0.996664
15.1	0.465959	0.573773	0.648241	0.717472	0.798549	0.849318	0.927578	0.992134
15.2	0.469202	0.573831	0.645211	0.723656	0.795977	0.851072	0.928657	0.994266
15.3	0.474734	0.574696	0.649872	0.716006	0.79811	0.850198	0.928893	0.992622
15.4	0.471819	0.574197	0.652376	0.718116	0.803064	0.851554	0.930564	0.996353
15.5	0.474379	0.583379	0.649667	0.72567	0.803668	0.85609	0.926611	1
15.6	0.474613	0.581114	0.656863	0.729006	0.801059	0.857741	0.924643	0.992633
15.7	0.478906	0.581327	0.655605	0.725006	0.799521	0.858214	0.931185	0.991661
15.8	0.477925	0.584499	0.657042	0.725009	0.803408	0.855406	0.927984	0.993764
15.9	0.481195	0.581163	0.662259	0.7258	0.805982	0.856416	0.921027	0.99989
16	0.480392	0.588844	0.660903	0.731568	0.803015	0.855605	0.925855	0.996064
16.1	0.485387	0.58739	0.658528	0.726943	0.802092	0.856785	0.925575	0.996618
16.2	0.487572	0.58653	0.661994	0.727984	0.805838	0.850137	0.927823	0.994549
16.3	0.490749	0.587872	0.664077	0.729133	0.807	0.855686	0.926697	0.992425
16.4	0.487707	0.587595	0.66503	0.730873	0.802144	0.855876	0.932469	0.993406
16.5	0.493228	0.591594	0.665889	0.730296	0.803269	0.855109	0.929381	0.99285
16.6	0.49145	0.596076	0.665307	0.734367	0.807211	0.85435	0.933401	0.992532
16.7	0.491303	0.596174	0.666738	0.732962	0.807352	0.852627	0.922343	0.991958
16.8	0.494047	0.597986	0.669828	0.730827	0.80711	0.856451	0.934197	0.99362
16.9	0.495031	0.597262	0.673588	0.73783	0.80621	0.85652	0.92999	0.994745
17	0.495963	0.595014	0.671283	0.733095	0.806322	0.854419	0.928764	0.99493
17.1	0.500182	0.598543	0.673158	0.732875	0.803168	0.858341	0.922308	0.996015
17.2	0.501316	0.601076	0.674304	0.734287	0.807	0.859371	0.932795	0.995726
17.3	0.498987	0.603082	0.673565	0.735879	0.808815	0.858849	0.928155	0.993758
17.4	0.505021	0.607505	0.675245	0.739942	0.807081	0.858987	0.929768	0.997541
17.5	0.506542	0.608077	0.676532	0.736436	0.811909	0.856811	0.93156	0.989006
17.6	0.506772	0.603581	0.675037	0.740845	0.809808	0.854047	0.930362	0.991652
17.7	0.507938	0.603881	0.679495	0.742104	0.809381	0.86155	0.929652	0.989433
17.8	0.506366	0.607327	0.675747	0.737377	0.813054	0.856246	0.927725	0.993138
17.9	0.509551	0.60593	0.678981	0.738722	0.80911	0.856702	0.926787	0.995989
18	0.50928	0.611086	0.68045	0.738485	0.805076	0.857316	0.928209	0.989023
18.1	0.509522	0.612503	0.683165	0.741166	0.809251	0.853949	0.928342	0.992342
18.2	0.516119	0.614125	0.68348	0.739818	0.805662	0.858823	0.926796	0.990997
18.3	0.51261	0.61014	0.68129	0.741094	0.805067	0.858756	0.927286	0.988683
18.4	0.514867	0.612526	0.680352	0.740352	0.810388	0.859501	0.9264	0.989193
18.5	0.514416	0.613805	0.684276	0.74251	0.805399	0.855764	0.929459	0.988723
18.6	0.518029	0.612919	0.685644	0.743754	0.806458	0.85525	0.926138	0.985786
18.7	0.515781	0.616454	0.682086	0.745148	0.808267	0.858124	0.923264	0.982092
18.8	0.520147	0.613432	0.685685	0.742525	0.813222	0.857132	0.927751	0.984779
18.9	0.52043	0.615545	0.682395	0.743731	0.814641	0.856104	0.923076	0.985586
19	0.520707	0.613366	0.687699	0.744614	0.81222	0.858759	0.923561	0.987754
19.1	0.520534	0.617114	0.686951	0.746299	0.813026	0.860794	0.921345	0.984487
19.2	0.52305	0.618843	0.683388	0.746657	0.811248	0.856768	0.926703	0.982762
19.3	0.521172	0.61684	0.682811	0.744034	0.813271	0.857109	0.924871	0.985335
19.4	0.52097	0.622043	0.688498	0.747006	0.809419	0.855851	0.923264	0.980802
19.5	0.524496	0.62273	0.689393	0.745457	0.811522	0.859403	0.926135	0.982055
19.6	0.523953	0.622554	0.688083	0.746282	0.815675	0.858979	0.919345	0.986343
19.7	0.52636	0.623806	0.687716	0.746074	0.808853	0.852593	0.917769	0.981855
19.8	0.527863	0.622857	0.69272	0.74797	0.810619	0.855879	0.923385	0.981301
19.9	0.527067	0.623186	0.693421	0.747168	0.813888	0.856491	0.923541	0.978912
20	0.528639	0.626651	0.692622	0.745604	0.810325	0.856592	0.919928	0.983734
20.1	0.529658	0.623861	0.693776	0.744421	0.810224	0.851112	0.914734	0.979876
20.2	0.533101	0.623999	0.69147	0.744931	0.806458	0.855458	0.921728	0.981544
20.3	0.531156	0.627494	0.688885	0.743936	0.810045	0.856154	0.917758	0.976884
20.4	0.530763	0.623737	0.696237	0.742352	0.811257	0.857383	0.918191	0.980658
20.5	0.532757	0.629453	0.693057	0.74406	0.810186	0.856612	0.919284	0.974792
20.6	0.534708	0.627136	0.690544	0.742992	0.808573	0.854128	0.920874	0.975931
20.7	0.534067	0.623673	0.695095	0.750053	0.8081	0.849823	0.918474	0.974665
20.8	0.536488	0.627289	0.692844	0.744805	0.809309	0.850798	0.912653	0.977899
20.9	0.53482	0.631144	0.695002	0.744718	0.803506	0.853793	0.911704	0.973305
21	0.540139	0.625067	0.69538	0.745673	0.806458	0.853075	0.918078	0.974532
21.1	0.535048	0.628709	0.69613	0.745869	0.806631	0.854474	0.914996	0.96651
21.2	0.539795	0.625638	0.6965	0.743532	0.807162	0.848285	0.916081	0.971369
21.3	0.537464	0.627609	0.698644	0.744862	0.807777	0.846507	0.91624	0.97218
21.4	0.540078	0.629987	0.6971	0.741959	0.803792	0.84913	0.920216	0.977461
21.5	0.537019	0.63463	0.695721	0.743947	0.810466	0.85141	0.910731	0.967771
21.6	0.53725	0.633554	0.695155	0.744686	0.807676	0.850752	0.912573	0.972134
21.7	0.539307	0.632826	0.694682	0.743901	0.808844	0.846293	0.907999	0.96367
21.8	0.541198	0.630933	0.700312	0.742317	0.806934	0.846553	0.910974	0.967984
21.9	0.541033	0.631912	0.692114	0.74769	0.804164	0.845258	0.913277	0.967531
22	0.543356	0.631851	0.695092	0.741457	0.804196	0.850694	0.909938	0.964931
22.1	0.545252	0.634434	0.69504	0.742358	0.804744	0.84995	0.91143	0.966351
22.2	0.541734	0.632018	0.697146	0.74743	0.802773	0.846253	0.908795	0.960392
22.3	0.543777	0.633989	0.691389	0.744634	0.80376	0.84492	0.910423	0.964637
22.4	0.541818	0.636517	0.696849	0.740704	0.805581	0.845001	0.909517	0.962736
22.5	0.541997	0.632691	0.696589	0.745165	0.803489	0.846048	0.908435	0.963292
22.6	0.54348	0.635651	0.696696	0.745959	0.800173	0.848781	0.905728	0.961339
22.7	0.546019	0.63388	0.695836	0.741414	0.800306	0.844732	0.903812	0.961449
22.8	0.54451	0.632633	0.699576	0.74288	0.802355	0.846409	0.906888	0.956454
22.9	0.544325	0.632974	0.692627	0.744403	0.802585	0.846218	0.908054	0.959593
23	0.548729	0.635799	0.699899	0.743463	0.799059	0.841887	0.903893	0.956503
23.1	0.546836	0.636647	0.696266	0.744216	0.800141	0.837389	0.903745	0.9533
23.2	0.546293	0.634895	0.694102	0.743431	0.79575	0.842712	0.903448	0.952492
23.3	0.551104	0.632336	0.694549	0.742802	0.79605	0.839328	0.899149	0.951629
23.4	0.547742	0.635204	0.694569	0.744865	0.795943	0.84135	0.90365	0.949188
23.5	0.552177	0.638032	0.699766	0.741515	0.799962	0.840609	0.898038	0.959129
23.6	0.54825	0.632815	0.700678	0.745448	0.800869	0.839247	0.897487	0.950146
23.7	0.549297	0.638875	0.69454	0.739489	0.800144	0.836451	0.896102	0.949635
23.8	0.548455	0.638629	0.697683	0.744796	0.7957	0.835859	0.896638	0.948386
23.9	0.549583	0.635095	0.698416	0.740517	0.796162	0.836177	0.899235	0.947263
24	0.551309	0.634766	0.69779	0.744934	0.798445	0.836384	0.894887	0.951721
24.1	0.551586	0.634907	0.696295	0.743085	0.800075	0.837544	0.896292	0.953329
24.2	0.551286	0.639186	0.692134	0.742205	0.795415	0.839215	0.893124	0.946132
24.3	0.554004	0.638497	0.698364	0.739596	0.794122	0.836315	0.891701	0.944986
24.4	0.55272	0.639804	0.69555	0.740517	0.794745	0.838355	0.890388	0.938563
24.5	0.549889	0.637161	0.695002	0.73551	0.795487	0.832832	0.894053	0.947145
24.6	0.555181	0.638886	0.697798	0.741547	0.79396	0.833288	0.895372	0.942144
24.7	0.553831	0.637348	0.694474	0.737166	0.79465	0.832278	0.890475	0.942251
24.8	0.554633	0.637484	0.696912	0.74215	0.794737	0.833138	0.891721	0.943258
24.9	0.551464	0.635891	0.698456	0.740453	0.793213	0.82844	0.893262	0.944545
25	0.556162	0.63403	0.696119	0.739105	0.790815	0.829289	0.889447	0.943327
25.1	0.555773	0.640257	0.696154	0.73916	0.79016	0.833724	0.890757	0.937974
25.2	0.554059	0.639198	0.698929	0.735969	0.791675	0.828031	0.891505	0.935317
25.3	0.5557	0.635432	0.694996	0.737351	0.789182	0.828772	0.891387	0.935776
25.4	0.556064	0.635819	0.695677	0.73624	0.793245	0.830408	0.883991	0.936644
25.5	0.555135	0.640583	0.696592	0.734298	0.788031	0.827953	0.883939	0.936817
25.6	0.552215	0.635934	0.696292	0.737135	0.788963	0.826943	0.880286	0.930801
25.7	0.553441	0.636705	0.696223	0.737547	0.791591	0.830255	0.88582	0.932376
25.8	0.556964	0.640762	0.693228	0.738277	0.788068	0.827373	0.885442	0.933026
25.9	0.558015	0.63708	0.69089	0.735859	0.789393	0.827122	0.882793	0.928749
26	0.559281	0.642412	0.692267	0.738433	0.784184	0.821752	0.881861	0.933271
26.1	0.553424	0.635744	0.694797	0.734662	0.784008	0.820906	0.876898	0.926738
26.2	0.556791	0.637288	0.696376	0.737521	0.781815	0.824242	0.879105	0.926077
26.3	0.553147	0.636217	0.695095	0.733585	0.786646	0.824946	0.880009	0.927687
26.4	0.556278	0.63667	0.695695	0.734255	0.786319	0.818321	0.881613	0.928207
26.5	0.558433	0.637775	0.688487	0.736211	0.784626	0.82129	0.879639	0.925183
26.6	0.557847	0.637813	0.690224	0.727243	0.78335	0.820014	0.877221	0.923165
26.7	0.55938	0.636249	0.690879	0.736318	0.781873	0.817357	0.879374	0.923082
26.8	0.557888	0.636104	0.694893	0.733101	0.780372	0.821853	0.873305	0.922182
26.9	0.557882	0.639833	0.697821	0.7322	0.784502	0.820257	0.876976	0.924779
27	0.558644	0.6377	0.68896	0.732832	0.784718	0.820488	0.873233	0.927266
27.1	0.556734	0.634936	0.694933	0.731652	0.779688	0.817591	0.868596	0.920909
27.2	0.557709	0.641942	0.691366	0.733868	0.781304	0.818875	0.872163	0.912607
27.3	0.557169	0.638866	0.693291	0.73379	0.778736	0.819518	0.870255	0.917671
27.4	0.559221	0.635995	0.694388	0.732039	0.777868	0.816439	0.870483	0.922484
27.5	0.559885	0.633588	0.68814	0.734682	0.779711	0.817798	0.871557	0.915028
27.6	0.560211	0.638488	0.692979	0.726749	0.775198	0.811211	0.869101	0.913577
27.7	0.555744	0.638575	0.695827	0.726371	0.773323	0.815975	0.869401	0.910835
27.8	0.563114	0.639443	0.691932	0.730022	0.774771	0.810154	0.869961	0.9151
27.9	0.558485	0.637236	0.691837	0.726455	0.77433	0.809606	0.871851	0.911609
28	0.557143	0.63695	0.692313	0.731796	0.77119	0.811438	0.862938	0.912027
28.1	0.556633	0.633981	0.688787	0.726008	0.771317	0.807595	0.865999	0.908504
28.2	0.556514	0.63555	0.691943	0.72853	0.774999	0.810824	0.863994	0.906917
28.3	0.557533	0.634298	0.691603	0.729303	0.779238	0.811583	0.861982	0.909035
28.4	0.558445	0.639068	0.689898	0.726016	0.776731	0.808432	0.8577	0.90872
28.5	0.560069	0.639166	0.688143	0.728619	0.773513	0.809615	0.860909	0.907419
28.6	0.556996	0.636024	0.686995	0.722358	0.774685	0.809554	0.862496	0.903699
28.7	0.557833	0.634696	0.6881	0.728789	0.774682	0.807569	0.858373	0.902187
28.8	0.557478	0.637383	0.685549	0.724308	0.769641	0.80638	0.860511	0.898398
28.9	0.552249	0.634388	0.686706	0.72314	0.771063	0.806735	0.86015	0.899838
29	0.55723	0.635677	0.684308	0.725284	0.768383	0.807771	0.857487	0.900378
29.1	0.558295	0.634033	0.688111	0.719668	0.762568	0.807266	0.85005	0.89796
29.2	0.559807	0.633392	0.685087	0.722311	0.76466	0.804591	0.856234	0.899218
29.3	0.557256	0.633629	0.685102	0.724144	0.765376	0.800283	0.849514	0.896139
29.4	0.560641	0.632137	0.68348	0.718462	0.765754	0.797917	0.855519	0.892552
29.5	0.56071	0.632777	0.684274	0.717677	0.768435	0.798765	0.853467	0.897842
29.6	0.557966	0.635724	0.688172	0.722782	0.764213	0.800153	0.850478	0.897478
29.7	0.559114	0.634757	0.689802	0.718736	0.766622	0.794979	0.852226	0.895083
29.8	0.557738	0.630755	0.687237	0.718306	0.763673	0.798502	0.845488	0.89012
29.9	0.555464	0.635894	0.680075	0.720993	0.770172	0.796364	0.849058	0.888844

## Sheet: LDDD n=5
x correct	19	17.2667	15.5333	13.8	12.0666	10.3333	8.59996	6.86662
time	100	158.382	250.848	397.299	629.249	996.618	1578.46	2500
0	0.00350387	0.00444204	0.00540612	0.00670711	0.00680041	0.00906549	0.00972894	0.0117063
0.1	0.00430468	0.00577672	0.00694813	0.00882188	0.00896701	0.0118955	0.0134868	0.0169025
0.2	0.00570675	0.00772562	0.00901106	0.0125279	0.0122558	0.0168092	0.0179755	0.0224979
0.3	0.00636502	0.00948792	0.0118178	0.0150988	0.0171876	0.0220236	0.0236123	0.0296766
0.4	0.00829837	0.0122791	0.0145856	0.0197792	0.0212228	0.0274012	0.0302805	0.036179
0.5	0.010097	0.0145053	0.0178096	0.0241073	0.025867	0.0337429	0.0378143	0.0462112
0.6	0.0111362	0.0173509	0.0212798	0.0291894	0.031978	0.0412923	0.0451642	0.0546547
0.7	0.0137045	0.0197404	0.0256208	0.0364719	0.0381383	0.0501841	0.054323	0.0646765
0.8	0.0153398	0.023208	0.0301768	0.0414322	0.0453041	0.0574873	0.0643914	0.0762066
0.9	0.0182502	0.0267066	0.0346629	0.0484763	0.0532163	0.06718	0.0748019	0.0871432
1	0.0203831	0.03055	0.0397295	0.0530297	0.060999	0.0768571	0.0844998	0.0979892
1.1	0.0226611	0.0343338	0.0445655	0.0615328	0.0688023	0.0854535	0.0963435	0.108651
1.2	0.0259965	0.0381512	0.0484141	0.0680015	0.0774843	0.0951565	0.10757	0.124076
1.3	0.0281657	0.0426114	0.0538824	0.0766213	0.085044	0.105855	0.119204	0.137566
1.4	0.0313223	0.046263	0.0607139	0.0834294	0.093402	0.117019	0.130623	0.148147
1.5	0.0334164	0.0507206	0.0662625	0.0925494	0.102807	0.127539	0.142664	0.162575
1.6	0.0374619	0.055497	0.0724047	0.0997437	0.112259	0.136581	0.153774	0.174981
1.7	0.0409165	0.0600193	0.0784069	0.107524	0.121736	0.149754	0.166633	0.189585
1.8	0.0433656	0.0654203	0.0837197	0.116942	0.13046	0.159128	0.179104	0.202784
1.9	0.0476392	0.0680845	0.0913572	0.12334	0.138172	0.169964	0.191039	0.216571
2	0.0506532	0.0734128	0.0975071	0.13117	0.148886	0.181774	0.20225	0.229752
2.1	0.0544603	0.0789071	0.102011	0.139898	0.158148	0.190761	0.216032	0.243809
2.2	0.0575081	0.0832169	0.111079	0.150799	0.168092	0.207584	0.228677	0.258167
2.3	0.0622248	0.0885557	0.117675	0.159068	0.179408	0.21909	0.239258	0.272035
2.4	0.0656354	0.0949466	0.122845	0.166092	0.187747	0.228182	0.251742	0.285672
2.5	0.0698468	0.0995701	0.129718	0.176093	0.197673	0.240565	0.266455	0.298321
2.6	0.0734206	0.105927	0.138994	0.186682	0.20572	0.250638	0.280602	0.313018
2.7	0.0785261	0.110761	0.143444	0.19398	0.217442	0.26208	0.290215	0.325155
2.8	0.0819393	0.115449	0.150762	0.202271	0.227829	0.272771	0.303201	0.338416
2.9	0.0848756	0.12058	0.157775	0.213526	0.237188	0.284531	0.317606	0.353634
3	0.0883561	0.126261	0.165602	0.220871	0.248135	0.293677	0.330439	0.367176
3.1	0.0931014	0.132188	0.172519	0.231025	0.255757	0.30754	0.337831	0.376562
3.2	0.0972609	0.136197	0.1775	0.237823	0.265921	0.314099	0.351779	0.394636
3.3	0.102177	0.144055	0.185855	0.246898	0.276093	0.329097	0.367448	0.406236
3.4	0.106254	0.149023	0.192661	0.257674	0.288424	0.337678	0.376342	0.415584
3.5	0.109418	0.15501	0.197681	0.262599	0.297764	0.349283	0.386449	0.429232
3.6	0.113819	0.159719	0.208185	0.273022	0.306096	0.361539	0.397347	0.441996
3.7	0.119274	0.166403	0.211367	0.279133	0.313265	0.371916	0.407662	0.454358
3.8	0.122161	0.170878	0.219637	0.291894	0.325995	0.379126	0.416901	0.46872
3.9	0.126956	0.175932	0.226018	0.297907	0.335965	0.391148	0.427374	0.481798
4	0.130659	0.183093	0.232797	0.308307	0.342998	0.401183	0.443224	0.490594
4.1	0.134728	0.188377	0.240925	0.316058	0.349975	0.411098	0.447306	0.505648
4.2	0.141352	0.192257	0.245445	0.324619	0.360362	0.421693	0.462024	0.516256
4.3	0.145385	0.197852	0.254943	0.331841	0.368658	0.432049	0.47225	0.528688
4.4	0.148596	0.204912	0.261378	0.339075	0.378444	0.442726	0.4864	0.53511
4.5	0.152203	0.209618	0.269153	0.352437	0.387103	0.448648	0.493618	0.54678
4.6	0.160766	0.216898	0.274219	0.357351	0.39707	0.459126	0.505462	0.557502
4.7	0.162614	0.221907	0.282168	0.364698	0.40472	0.465484	0.513263	0.56821
4.8	0.167141	0.228146	0.288891	0.372626	0.413304	0.478509	0.522437	0.577758
4.9	0.172651	0.234697	0.297088	0.382614	0.423974	0.482915	0.530266	0.590677
5	0.177863	0.239764	0.30139	0.387434	0.427685	0.494209	0.537808	0.599556
5.1	0.179345	0.245331	0.306604	0.395857	0.43829	0.503878	0.551085	0.6073
5.2	0.184661	0.251646	0.316976	0.403692	0.444732	0.515245	0.555498	0.617334
5.3	0.187794	0.256625	0.323292	0.413413	0.453868	0.521048	0.565909	0.630686
5.4	0.194486	0.259574	0.32947	0.420003	0.46129	0.527511	0.576814	0.639171
5.5	0.196867	0.264397	0.333832	0.426622	0.46729	0.534042	0.581347	0.646065
5.6	0.202867	0.272602	0.341905	0.433596	0.470871	0.54261	0.589876	0.653887
5.7	0.207138	0.2792	0.347184	0.441441	0.483379	0.552147	0.601414	0.664712
5.8	0.213153	0.286022	0.350833	0.445585	0.491376	0.558414	0.609925	0.673445
5.9	0.21329	0.29	0.358486	0.455262	0.499579	0.565004	0.614427	0.678808
6	0.22091	0.293618	0.365755	0.467476	0.503948	0.573878	0.624555	0.690975
6.1	0.225323	0.300457	0.372115	0.466292	0.511614	0.58772	0.630904	0.696384
6.2	0.228174	0.305337	0.379431	0.472857	0.518505	0.590327	0.640661	0.704198
6.3	0.234892	0.309331	0.383549	0.482757	0.527973	0.599113	0.644989	0.709386
6.4	0.238046	0.316066	0.389178	0.489091	0.534066	0.603226	0.654065	0.717874
6.5	0.242594	0.322115	0.396108	0.49524	0.539593	0.610855	0.659173	0.726672
6.6	0.248285	0.32494	0.405806	0.500719	0.546961	0.617428	0.665523	0.731599
6.7	0.252312	0.332018	0.406698	0.507478	0.553391	0.621686	0.676369	0.738804
6.8	0.255878	0.336035	0.409992	0.513553	0.559767	0.628134	0.682856	0.746304
6.9	0.26009	0.337833	0.417663	0.522051	0.562112	0.635722	0.686753	0.752047
7	0.262819	0.346062	0.425106	0.52302	0.573901	0.643831	0.695391	0.763167
7.1	0.268266	0.353168	0.427571	0.530598	0.578354	0.651549	0.700409	0.764777
7.2	0.271537	0.354422	0.433612	0.537191	0.583047	0.657271	0.704571	0.771958
7.3	0.275235	0.360748	0.442491	0.543255	0.591672	0.660835	0.714816	0.778883
7.4	0.27953	0.36399	0.441057	0.548115	0.591996	0.664121	0.718817	0.785367
7.5	0.283718	0.369985	0.45109	0.552409	0.601468	0.670284	0.721484	0.790556
7.6	0.289479	0.37613	0.455591	0.557958	0.606473	0.673899	0.728823	0.799393
7.7	0.290959	0.381375	0.459523	0.565188	0.608401	0.681467	0.732851	0.798561
7.8	0.297575	0.384508	0.466279	0.566419	0.616233	0.687178	0.740408	0.806372
7.9	0.301201	0.391293	0.471654	0.575892	0.618907	0.691561	0.742719	0.816249
8	0.305925	0.393595	0.476672	0.578566	0.623689	0.699657	0.749774	0.816316
8.1	0.308714	0.400377	0.479696	0.584089	0.635509	0.706201	0.752096	0.826413
8.2	0.311808	0.402251	0.482941	0.58801	0.632552	0.704814	0.756385	0.828759
8.3	0.315587	0.407789	0.486825	0.592929	0.640369	0.710112	0.763281	0.831143
8.4	0.321732	0.411228	0.492224	0.597146	0.646176	0.716609	0.764798	0.836964
8.5	0.324111	0.416437	0.498312	0.601914	0.651634	0.721372	0.773277	0.841906
8.6	0.327386	0.421457	0.502082	0.607033	0.658362	0.724376	0.777592	0.845858
8.7	0.33285	0.425166	0.50738	0.613258	0.661037	0.727564	0.77994	0.854968
8.8	0.335801	0.429846	0.512203	0.616474	0.664271	0.733364	0.78567	0.860755
8.9	0.341008	0.43341	0.521501	0.619768	0.667381	0.741758	0.79322	0.861201
9	0.343156	0.437367	0.518277	0.620703	0.670418	0.738583	0.794326	0.865277
9.1	0.347977	0.43829	0.524842	0.628989	0.678738	0.748455	0.79739	0.870414
9.2	0.349076	0.446943	0.531023	0.632187	0.678206	0.751487	0.800958	0.870717
9.3	0.354433	0.451473	0.533042	0.638785	0.682682	0.751728	0.805828	0.878818
9.4	0.360595	0.454295	0.538163	0.641149	0.684584	0.755185	0.80849	0.88227
9.5	0.359808	0.459761	0.544585	0.646596	0.691447	0.759604	0.813416	0.883709
9.6	0.367279	0.459917	0.54529	0.647835	0.697091	0.764124	0.815941	0.891315
9.7	0.369513	0.466486	0.547296	0.657758	0.699468	0.770108	0.815645	0.893264
9.8	0.369239	0.470558	0.552663	0.655879	0.701684	0.772536	0.824444	0.898149
9.9	0.376573	0.473616	0.5578	0.659287	0.706947	0.773798	0.82597	0.902389
10	0.379729	0.475873	0.561557	0.666624	0.710143	0.780215	0.828046	0.903721
10.1	0.380486	0.4801	0.562415	0.664377	0.713561	0.778064	0.829863	0.910276
10.2	0.3869	0.482199	0.569786	0.670157	0.715119	0.784486	0.83714	0.91181
10.3	0.390982	0.489933	0.570631	0.674588	0.71587	0.787814	0.840273	0.911491
10.4	0.390697	0.487131	0.5764	0.67717	0.720279	0.787088	0.840333	0.910991
10.5	0.395813	0.491607	0.576643	0.679287	0.72351	0.79102	0.8532	0.918335
10.6	0.398063	0.499281	0.578849	0.685515	0.73036	0.796739	0.846576	0.92391
10.7	0.400716	0.496225	0.585346	0.687793	0.732985	0.798299	0.850088	0.918649
10.8	0.402616	0.502354	0.584097	0.689446	0.735582	0.800868	0.856523	0.9288
10.9	0.406501	0.505244	0.589977	0.69216	0.736497	0.80291	0.852739	0.927357
11	0.410603	0.51143	0.59316	0.693163	0.738021	0.80752	0.857181	0.933245
11.1	0.415157	0.512387	0.5941	0.694536	0.738969	0.811882	0.859666	0.93382
11.2	0.417743	0.51346	0.599527	0.699012	0.745638	0.807344	0.862766	0.938216
11.3	0.418163	0.51928	0.597892	0.70285	0.748965	0.811203	0.867952	0.941569
11.4	0.421032	0.524396	0.604376	0.704695	0.750538	0.81572	0.868151	0.943238
11.5	0.425637	0.522999	0.604078	0.706178	0.754242	0.813854	0.869434	0.942712
11.6	0.426684	0.527112	0.61049	0.713279	0.758508	0.821038	0.873462	0.945065
11.7	0.432718	0.532964	0.613696	0.711786	0.759575	0.821297	0.873868	0.947001
11.8	0.432096	0.53624	0.617552	0.718426	0.75922	0.822878	0.882094	0.950231
11.9	0.435014	0.53688	0.619003	0.719758	0.76325	0.828116	0.879399	0.949463
12	0.438533	0.539723	0.62033	0.719226	0.762595	0.825535	0.882592	0.95546
12.1	0.442848	0.539117	0.62314	0.716858	0.768133	0.829915	0.884393	0.957972
12.2	0.445792	0.540949	0.620048	0.724034	0.768918	0.832561	0.882957	0.957158
12.3	0.44565	0.545694	0.626859	0.726281	0.772116	0.835417	0.890017	0.955556
12.4	0.447669	0.550346	0.632488	0.731311	0.771937	0.83934	0.891541	0.964593
12.5	0.452126	0.549841	0.631777	0.730534	0.774112	0.837327	0.894741	0.966135
12.6	0.457685	0.552655	0.634719	0.735326	0.777121	0.838091	0.890828	0.964461
12.7	0.454264	0.555711	0.637557	0.735681	0.778525	0.84033	0.896097	0.964033
12.8	0.459043	0.555462	0.639609	0.735743	0.780954	0.84245	0.892655	0.966449
12.9	0.461267	0.55994	0.642268	0.737622	0.780073	0.842463	0.898333	0.967628
13	0.460622	0.561138	0.641107	0.738464	0.778054	0.841994	0.899707	0.97545
13.1	0.466108	0.568135	0.643948	0.740846	0.784958	0.847509	0.900873	0.968932
13.2	0.468713	0.569993	0.646405	0.742717	0.783763	0.847553	0.896509	0.973827
13.3	0.466917	0.56885	0.648226	0.744902	0.791204	0.847004	0.905471	0.973861
13.4	0.473157	0.571162	0.655361	0.748069	0.788612	0.853783	0.902832	0.977152
13.5	0.479732	0.576252	0.656126	0.750041	0.791222	0.854869	0.905326	0.980262
13.6	0.475604	0.572357	0.651658	0.751738	0.791823	0.853998	0.904398	0.975911
13.7	0.479999	0.581059	0.653086	0.756095	0.793295	0.853203	0.907868	0.976678
13.8	0.482518	0.579771	0.658658	0.749655	0.793751	0.855642	0.907223	0.977865
13.9	0.485123	0.584387	0.659653	0.756994	0.797729	0.858101	0.91032	0.98148
14	0.486831	0.581728	0.662286	0.756937	0.795438	0.861455	0.912776	0.984214
14.1	0.485747	0.58667	0.665533	0.754802	0.793686	0.857085	0.90827	0.980353
14.2	0.486382	0.587404	0.661104	0.757772	0.799401	0.859143	0.913492	0.987819
14.3	0.490811	0.588373	0.668045	0.76205	0.802288	0.864103	0.914731	0.987192
14.4	0.489368	0.590034	0.667461	0.763937	0.799258	0.865917	0.914658	0.992215
14.5	0.491661	0.590905	0.666871	0.759775	0.80743	0.860024	0.916451	0.984137
14.6	0.495725	0.594463	0.670406	0.764321	0.803545	0.866008	0.917755	0.983338
14.7	0.498374	0.597042	0.669322	0.767788	0.801596	0.86379	0.917519	0.983248
14.8	0.502987	0.600844	0.675672	0.76528	0.807717	0.865249	0.918758	0.986303
14.9	0.501953	0.601354	0.675555	0.772093	0.806266	0.864754	0.913012	0.989945
15	0.502896	0.600986	0.679207	0.765067	0.80519	0.870129	0.918118	0.986231
15.1	0.504215	0.601588	0.676999	0.767257	0.809208	0.867236	0.917501	0.987368
15.2	0.508541	0.60576	0.675716	0.772155	0.812292	0.869719	0.919281	0.990214
15.3	0.509326	0.602915	0.681671	0.767843	0.807979	0.869986	0.920131	0.991925
15.4	0.509961	0.606092	0.683182	0.773132	0.810122	0.870328	0.922832	0.990945
15.5	0.513273	0.610301	0.679787	0.774503	0.811973	0.874884	0.922487	0.997828
15.6	0.513778	0.611788	0.680544	0.774376	0.813878	0.868037	0.921362	0.988314
15.7	0.516183	0.611822	0.682604	0.771046	0.820294	0.871945	0.921388	0.993648
15.8	0.517658	0.616961	0.682926	0.775174	0.814945	0.871847	0.923169	0.994511
15.9	0.517417	0.616816	0.686248	0.77639	0.817983	0.880726	0.91825	0.996729
16	0.52132	0.613496	0.689291	0.780827	0.814733	0.872174	0.926232	0.990634
16.1	0.523385	0.61765	0.689998	0.777579	0.817254	0.873537	0.926434	0.999378
16.2	0.522022	0.615624	0.689431	0.780474	0.818517	0.87595	0.920494	0.995809
16.3	0.520501	0.619304	0.692608	0.779878	0.819761	0.875887	0.922695	0.998919
16.4	0.526578	0.619081	0.694806	0.775986	0.819742	0.870517	0.922057	0.991554
16.5	0.528183	0.623873	0.696376	0.784712	0.817185	0.875903	0.922943	0.998611
16.6	0.528424	0.621919	0.696628	0.777794	0.818428	0.877782	0.928181	0.993461
16.7	0.530696	0.625148	0.694365	0.778725	0.816127	0.878588	0.924884	1
16.8	0.530953	0.624513	0.697037	0.781384	0.819387	0.880265	0.927349	0.995807
16.9	0.534773	0.63044	0.699165	0.78183	0.821824	0.87661	0.92808	0.995275
17	0.5373	0.625524	0.694248	0.784846	0.822326	0.874827	0.923617	0.996719
17.1	0.534454	0.628496	0.698965	0.784048	0.822329	0.878152	0.927271	0.997421
17.2	0.533734	0.630668	0.70101	0.779977	0.820784	0.880161	0.928233	0.994151
17.3	0.535908	0.629613	0.700896	0.782827	0.8203	0.877284	0.930928	0.999199
17.4	0.540184	0.628033	0.697745	0.787801	0.822365	0.880094	0.927691	0.997688
17.5	0.541353	0.631658	0.700865	0.784385	0.823067	0.880122	0.928215	0.997071
17.6	0.543414	0.6349	0.702124	0.785087	0.819323	0.880467	0.923402	0.999368
17.7	0.544803	0.633747	0.703583	0.789081	0.824584	0.879824	0.924926	0.998878
17.8	0.544857	0.635001	0.707883	0.788848	0.822293	0.877878	0.931612	0.994918
17.9	0.545108	0.634403	0.703083	0.787751	0.825498	0.878295	0.926266	0.995833
18	0.547786	0.637881	0.702744	0.792927	0.824068	0.880428	0.925387	0.995402
18.1	0.548711	0.633397	0.702961	0.78531	0.827569	0.877536	0.92822	0.996841
18.2	0.544085	0.639739	0.704656	0.783239	0.82716	0.882701	0.927474	0.996514
18.3	0.550815	0.638407	0.704332	0.789918	0.827147	0.879653	0.926424	0.995291
18.4	0.54855	0.640195	0.703285	0.789576	0.825079	0.878717	0.926346	0.997364
18.5	0.55195	0.640827	0.709376	0.789392	0.828077	0.87631	0.930127	0.998059
18.6	0.550652	0.645228	0.708414	0.791045	0.824493	0.879881	0.928502	0.997336
18.7	0.553262	0.641359	0.706823	0.787907	0.821497	0.881908	0.930021	0.998702
18.8	0.554332	0.64317	0.705913	0.790618	0.824094	0.876605	0.933771	0.995459
18.9	0.553604	0.646472	0.707852	0.790224	0.83071	0.879238	0.927295	0.994996
19	0.557009	0.641776	0.709578	0.791388	0.822998	0.878606	0.925872	0.995218
19.1	0.559186	0.6436	0.714191	0.788135	0.82752	0.877157	0.926717	0.996149
19.2	0.555967	0.646482	0.710534	0.7928	0.827354	0.879228	0.926673	0.997004
19.3	0.557071	0.646443	0.711097	0.792051	0.823861	0.879536	0.928565	0.990033
19.4	0.557893	0.647353	0.710363	0.79188	0.824454	0.878995	0.926395	0.998958
19.5	0.559759	0.64337	0.711612	0.7952	0.826566	0.882755	0.926121	0.994332
19.6	0.560715	0.650992	0.711581	0.792779	0.826647	0.874773	0.924618	0.995465
19.7	0.561316	0.647441	0.714196	0.795049	0.829329	0.881439	0.927142	0.993381
19.8	0.558562	0.648649	0.710964	0.792473	0.827375	0.880524	0.922415	0.992464
19.9	0.566489	0.646643	0.714175	0.789211	0.829204	0.882234	0.925214	0.993241
20	0.560865	0.650541	0.712182	0.793883	0.826828	0.879617	0.923677	0.98898
20.1	0.568322	0.648807	0.713709	0.793616	0.828445	0.875141	0.924099	0.992567
20.2	0.564058	0.647291	0.714183	0.793422	0.828176	0.880798	0.924172	0.988268
20.3	0.566673	0.648566	0.714647	0.792893	0.823902	0.875449	0.923713	0.99264
20.4	0.569952	0.649315	0.712203	0.790302	0.825322	0.879207	0.925488	0.991512
20.5	0.567531	0.653112	0.716425	0.793489	0.822922	0.878412	0.922847	0.992375
20.6	0.569107	0.654078	0.714437	0.795964	0.826398	0.879707	0.927186	0.990976
20.7	0.569711	0.6537	0.718021	0.78855	0.826989	0.878585	0.919484	0.989154
20.8	0.571297	0.651067	0.713714	0.793549	0.828831	0.877784	0.923495	0.990665
20.9	0.569234	0.654229	0.714626	0.788861	0.829484	0.878287	0.920839	0.994019
21	0.572948	0.652702	0.717596	0.793295	0.829873	0.880842	0.92441	0.992204
21.1	0.569483	0.653964	0.716923	0.791209	0.827657	0.876551	0.923843	0.988467
21.2	0.570328	0.655452	0.717008	0.79047	0.826284	0.878435	0.917288	0.987482
21.3	0.572248	0.662322	0.714844	0.790157	0.820556	0.872648	0.922762	0.989994
21.4	0.573728	0.655721	0.71621	0.792632	0.824159	0.874407	0.920007	0.984849
21.5	0.573772	0.656556	0.713584	0.788249	0.824317	0.877217	0.920468	0.981923
21.6	0.57484	0.658155	0.718402	0.790543	0.821818	0.87257	0.920212	0.982001
21.7	0.573984	0.655664	0.71663	0.791711	0.82315	0.874141	0.915137	0.983867
21.8	0.575443	0.656872	0.716243	0.788858	0.827276	0.875118	0.917509	0.983157
21.9	0.57648	0.656305	0.715515	0.792701	0.824843	0.872378	0.922425	0.984385
22	0.577068	0.655703	0.717863	0.79139	0.823741	0.874882	0.915801	0.980317
22.1	0.576799	0.659798	0.717887	0.789851	0.820484	0.873941	0.918678	0.982206
22.2	0.577226	0.658634	0.715984	0.789586	0.822554	0.87391	0.9123	0.980511
22.3	0.575837	0.660205	0.717656	0.789822	0.822653	0.873223	0.913235	0.976836
22.4	0.57866	0.657953	0.719649	0.793839	0.820587	0.866057	0.913904	0.982203
22.5	0.579771	0.656882	0.718594	0.790071	0.819361	0.874234	0.917796	0.977707
22.6	0.57938	0.658443	0.717096	0.788861	0.823811	0.873537	0.908705	0.977505
22.7	0.578608	0.66043	0.717493	0.791147	0.826701	0.868931	0.916651	0.975753
22.8	0.581067	0.656628	0.718931	0.792839	0.825483	0.870714	0.916446	0.979109
22.9	0.579655	0.657479	0.714505	0.790543	0.823301	0.870567	0.916174	0.976059
23	0.576783	0.659464	0.716394	0.787355	0.820631	0.868322	0.916008	0.972568
23.1	0.580554	0.658507	0.714411	0.792619	0.820377	0.86897	0.909643	0.976403
23.2	0.576921	0.657134	0.717643	0.791297	0.817254	0.867542	0.912325	0.972311
23.3	0.57994	0.661153	0.718739	0.785968	0.818786	0.867524	0.909319	0.973379
23.4	0.58321	0.659306	0.716793	0.78864	0.821862	0.866094	0.9138	0.970901
23.5	0.583029	0.659889	0.714642	0.78891	0.818141	0.866298	0.911268	0.968971
23.6	0.581262	0.654568	0.713947	0.788195	0.81607	0.867584	0.90977	0.969932
23.7	0.583091	0.657466	0.717037	0.787114	0.81855	0.866042	0.912297	0.966871
23.8	0.579847	0.659635	0.720517	0.789778	0.812963	0.866265	0.909599	0.97109
23.9	0.579924	0.661944	0.712815	0.787451	0.818086	0.864466	0.909744	0.969637
24	0.585165	0.663841	0.71629	0.784693	0.818361	0.866311	0.903887	0.971381
24.1	0.587341	0.661413	0.712525	0.784245	0.818872	0.862074	0.904587	0.966926
24.2	0.580813	0.658181	0.717913	0.788052	0.820105	0.864057	0.904361	0.969712
24.3	0.584356	0.659609	0.710998	0.78326	0.815881	0.861514	0.900458	0.967828
24.4	0.587894	0.65893	0.716469	0.786197	0.814585	0.863909	0.901778	0.966623
24.5	0.584314	0.658111	0.714852	0.786173	0.816697	0.861182	0.900736	0.961022
24.6	0.582311	0.659254	0.715445	0.785279	0.816925	0.859068	0.904794	0.963505
24.7	0.585009	0.662664	0.715137	0.78439	0.813756	0.861662	0.90276	0.96138
24.8	0.58469	0.659736	0.712874	0.787759	0.812022	0.860374	0.90037	0.962769
24.9	0.58574	0.660705	0.712442	0.780853	0.813533	0.85617	0.899655	0.959449
25	0.586033	0.661146	0.710827	0.784608	0.812312	0.861353	0.90212	0.958187
25.1	0.586543	0.659383	0.716101	0.784473	0.813209	0.85907	0.89816	0.957873
25.2	0.584154	0.656359	0.715139	0.781073	0.814443	0.857176	0.90283	0.956119
25.3	0.586914	0.655006	0.713654	0.783672	0.814567	0.856642	0.902177	0.960159
25.4	0.588274	0.659114	0.711304	0.77872	0.810428	0.86004	0.900383	0.957567
25.5	0.587321	0.663286	0.716015	0.77964	0.810711	0.856243	0.89505	0.953154
25.6	0.585157	0.660163	0.71071	0.777704	0.813364	0.858741	0.900746	0.953201
25.7	0.584812	0.661563	0.714315	0.780422	0.813494	0.85743	0.894638	0.955168
25.8	0.587155	0.655918	0.709645	0.784149	0.808329	0.855841	0.892878	0.954927
25.9	0.588891	0.661692	0.712978	0.780003	0.811918	0.854561	0.891199	0.94923
26	0.587562	0.6593	0.714743	0.780586	0.806543	0.854159	0.897522	0.953307
26.1	0.585911	0.663071	0.713623	0.778779	0.813445	0.853519	0.891878	0.951837
26.2	0.588215	0.660544	0.709433	0.776224	0.811338	0.85497	0.8925	0.95241
26.3	0.585082	0.657927	0.710231	0.781456	0.808287	0.854908	0.891637	0.952467
26.4	0.588269	0.658761	0.710892	0.773713	0.804232	0.848647	0.886741	0.950723
26.5	0.588915	0.661003	0.707502	0.778181	0.806961	0.846791	0.886878	0.946778
26.6	0.588272	0.657367	0.709269	0.776058	0.805118	0.849261	0.886619	0.947032
26.7	0.588386	0.659186	0.706888	0.774195	0.800062	0.848476	0.891289	0.950808
26.8	0.585672	0.661063	0.705722	0.775387	0.807025	0.847079	0.885951	0.94349
26.9	0.587671	0.656978	0.712066	0.77519	0.806502	0.846452	0.889683	0.945317
27	0.585488	0.657605	0.710234	0.773332	0.802462	0.846628	0.888682	0.941253
27.1	0.58703	0.656172	0.709474	0.775755	0.802477	0.843534	0.886124	0.942518
27.2	0.586064	0.65659	0.707984	0.770896	0.803094	0.845996	0.882784	0.939867
27.3	0.590988	0.660088	0.705841	0.768752	0.799095	0.845599	0.885391	0.943987
27.4	0.589912	0.655965	0.703166	0.768447	0.801772	0.846071	0.884419	0.938441
27.5	0.586554	0.659166	0.706286	0.770797	0.798673	0.842038	0.880744	0.939356
27.6	0.584429	0.656683	0.705569	0.770152	0.802879	0.841805	0.887565	0.936829
27.7	0.586955	0.660817	0.7071	0.769066	0.801591	0.844749	0.880555	0.941953
27.8	0.586222	0.6593	0.70376	0.767052	0.801816	0.84415	0.881949	0.935277
27.9	0.585781	0.655226	0.706693	0.77222	0.799481	0.84146	0.880394	0.932996
28	0.590882	0.660721	0.705058	0.770551	0.799764	0.840618	0.875934	0.936422
28.1	0.587085	0.657053	0.698299	0.769068	0.79783	0.839597	0.879762	0.934445
28.2	0.587769	0.656556	0.704076	0.770551	0.792909	0.837054	0.8829	0.932623
28.3	0.58545	0.657388	0.703314	0.768143	0.795977	0.837065	0.87447	0.931742
28.4	0.585973	0.657955	0.703526	0.764414	0.797924	0.839698	0.876196	0.931011
28.5	0.588482	0.654589	0.70675	0.767247	0.797455	0.837386	0.877116	0.931257
28.6	0.588731	0.65334	0.703773	0.768726	0.793736	0.840312	0.870051	0.929148
28.7	0.587785	0.657362	0.701412	0.768078	0.790607	0.837161	0.877396	0.930254
28.8	0.584965	0.656893	0.701977	0.76523	0.789636	0.832418	0.871961	0.925125
28.9	0.587155	0.648154	0.704148	0.761542	0.788482	0.833597	0.868089	0.929044
29	0.587012	0.654659	0.700144	0.766866	0.792779	0.83233	0.867296	0.924791
29.1	0.58568	0.654156	0.704851	0.764619	0.788539	0.833519	0.870911	0.922599
29.2	0.583159	0.654615	0.700346	0.761537	0.789467	0.832405	0.865433	0.925081
29.3	0.585976	0.653358	0.703443	0.761296	0.790377	0.834696	0.870178	0.926222
29.4	0.584815	0.655983	0.699224	0.763336	0.784753	0.827478	0.865026	0.923558
29.5	0.58618	0.650878	0.696812	0.762991	0.786593	0.827186	0.865824	0.91755
29.6	0.589223	0.65228	0.700777	0.759967	0.788482	0.825581	0.870017	0.919839
29.7	0.585424	0.652782	0.696024	0.760843	0.786456	0.829578	0.864601	0.918449
29.8	0.58835	0.650919	0.698232	0.761491	0.784333	0.83142	0.862626	0.916713
29.9	0.584607	0.651082	0.696249	0.762571	0.790649	0.82555	0.859223	0.920945

## Sheet: LDDD n=6
x correct	19	17.2667	15.5333	13.8	12.0666	10.3333	8.59996	6.86662
time	100	158.382	250.848	397.299	629.249	996.618	1578.46	2500
0	0.00265052	0.00306382	0.00365682	0.00455829	0.00446245	0.00569936	0.00639419	0.010051
0.1	0.00349209	0.00415098	0.0040791	0.00537591	0.00614261	0.00746038	0.00915851	0.0138576
0.2	0.00405514	0.00524713	0.00569337	0.00736455	0.00778983	0.0100899	0.0110154	0.0174904
0.3	0.00471103	0.00572033	0.00755622	0.00884704	0.010048	0.0128393	0.0151184	0.0229292
0.4	0.00536093	0.00764308	0.00901176	0.0122523	0.0127345	0.0161936	0.0191975	0.0276283
0.5	0.00650201	0.00909562	0.0111681	0.0152592	0.0168435	0.0208388	0.0241871	0.0337739
0.6	0.00796653	0.0107338	0.0138096	0.0181942	0.0206531	0.0253252	0.0287154	0.040216
0.7	0.00920643	0.0128033	0.0163523	0.021854	0.0262506	0.0305184	0.0358464	0.0477932
0.8	0.0107488	0.0152622	0.0192874	0.0256965	0.0301021	0.0377542	0.0431391	0.0552835
0.9	0.012399	0.0173557	0.0221356	0.0310934	0.0359842	0.0435134	0.0507642	0.0634866
1	0.0133065	0.0194731	0.0250706	0.0356128	0.043169	0.0500693	0.0580029	0.0742295
1.1	0.0153221	0.022462	0.0297427	0.040827	0.0494464	0.0586199	0.0668889	0.0839331
1.2	0.0175533	0.0258133	0.0341752	0.0459603	0.0553434	0.0660503	0.0765086	0.0944782
1.3	0.0191856	0.0288442	0.0379848	0.0521628	0.0629416	0.0730704	0.0842026	0.103466
1.4	0.0213749	0.0313929	0.0435913	0.0576166	0.0698299	0.0823727	0.0939062	0.113897
1.5	0.0238427	0.0354181	0.0470654	0.0642024	0.0767782	0.0901625	0.104754	0.123245
1.6	0.0264363	0.038458	0.0519591	0.0705787	0.084553	0.100534	0.11449	0.135368
1.7	0.0280326	0.0415158	0.0571104	0.0777455	0.0934719	0.109231	0.127626	0.146947
1.8	0.0299763	0.0466431	0.0617556	0.0841966	0.101795	0.116581	0.133355	0.159645
1.9	0.0326837	0.0494614	0.0664337	0.0918966	0.109866	0.126979	0.144236	0.16901
2	0.0356248	0.0527588	0.071552	0.0966316	0.119776	0.13609	0.154311	0.181343
2.1	0.0383052	0.0566612	0.0785182	0.103244	0.126871	0.144682	0.165985	0.196282
2.2	0.0415038	0.0622767	0.0827441	0.113059	0.1355	0.15639	0.178675	0.207929
2.3	0.0445257	0.0646247	0.0889256	0.118803	0.143532	0.164772	0.189193	0.21828
2.4	0.04673	0.0694166	0.0941548	0.125167	0.154727	0.175485	0.199681	0.229984
2.5	0.0494674	0.0736904	0.0996715	0.135868	0.163877	0.184722	0.211841	0.243228
2.6	0.0521179	0.0783325	0.104999	0.139792	0.171077	0.19609	0.223554	0.251548
2.7	0.0554393	0.0815581	0.109764	0.151421	0.178926	0.205267	0.234027	0.268514
2.8	0.0580508	0.0877965	0.117219	0.156509	0.189466	0.216965	0.246184	0.281716
2.9	0.0614501	0.0920883	0.125326	0.164742	0.199544	0.227507	0.258499	0.292875
3	0.0664516	0.097003	0.129609	0.172565	0.207127	0.234309	0.267025	0.306091
3.1	0.0684043	0.102505	0.134742	0.181236	0.218534	0.244902	0.280003	0.31823
3.2	0.071546	0.106377	0.142412	0.187531	0.227495	0.25867	0.288559	0.330015
3.3	0.0747446	0.110019	0.149378	0.197441	0.234285	0.263312	0.303543	0.344253
3.4	0.0782906	0.115907	0.155949	0.206618	0.242985	0.27572	0.311551	0.356263
3.5	0.0817587	0.120199	0.16184	0.214093	0.252539	0.287511	0.321291	0.36924
3.6	0.0854785	0.125251	0.167201	0.221368	0.264513	0.296142	0.332698	0.379881
3.7	0.0888687	0.129228	0.172721	0.229334	0.274986	0.307544	0.343172	0.393169
3.8	0.0918217	0.134464	0.18005	0.235986	0.282324	0.317212	0.354669	0.403669
3.9	0.0969041	0.140154	0.185354	0.246088	0.291877	0.324921	0.366697	0.416602
4	0.100181	0.143829	0.189499	0.254144	0.303273	0.335855	0.374897	0.427482
4.1	0.10328	0.149962	0.200385	0.263111	0.311785	0.345861	0.389908	0.436814
4.2	0.106901	0.154973	0.207816	0.271146	0.318041	0.355002	0.396832	0.450822
4.3	0.110253	0.160648	0.212616	0.279164	0.328146	0.364412	0.410213	0.463817
4.4	0.1142	0.16645	0.219604	0.287762	0.336065	0.374481	0.419192	0.471654
4.5	0.11753	0.170618	0.225977	0.293902	0.346346	0.38511	0.426416	0.482835
4.6	0.121594	0.174212	0.234066	0.302854	0.355412	0.391531	0.438929	0.494847
4.7	0.126803	0.180918	0.240068	0.309787	0.361057	0.402268	0.446147	0.508142
4.8	0.130876	0.185051	0.246001	0.321183	0.371615	0.414981	0.458746	0.518345
4.9	0.133703	0.190373	0.250802	0.324331	0.381103	0.419036	0.470741	0.525728
5	0.138126	0.197181	0.260494	0.333531	0.387793	0.427527	0.476728	0.536938
5.1	0.141097	0.204961	0.269065	0.341027	0.395715	0.43812	0.483934	0.547253
5.2	0.14518	0.206477	0.273174	0.35248	0.408821	0.446509	0.492496	0.559253
5.3	0.14815	0.211889	0.276747	0.357011	0.413032	0.455886	0.505758	0.564093
5.4	0.151511	0.218301	0.283144	0.363253	0.421699	0.461798	0.513844	0.57734
5.5	0.156959	0.223934	0.290712	0.371276	0.42797	0.472852	0.520265	0.58521
5.6	0.162086	0.229241	0.296708	0.381351	0.43759	0.480037	0.532553	0.594312
5.7	0.166039	0.234839	0.304411	0.387095	0.444586	0.488163	0.539619	0.606199
5.8	0.170076	0.235965	0.312572	0.398093	0.453909	0.49574	0.548714	0.615923
5.9	0.174823	0.245908	0.317128	0.402136	0.460966	0.501553	0.557145	0.625082
6	0.176195	0.249888	0.323672	0.406679	0.465131	0.510876	0.562925	0.633656
6.1	0.180151	0.255309	0.329084	0.414047	0.472457	0.519537	0.575114	0.640695
6.2	0.18423	0.259655	0.334696	0.421142	0.485862	0.526357	0.57704	0.651027
6.3	0.191221	0.266373	0.343843	0.43275	0.491741	0.532841	0.587406	0.65643
6.4	0.193401	0.268616	0.346418	0.437554	0.496869	0.543368	0.593839	0.661189
6.5	0.20011	0.275639	0.356301	0.444143	0.503251	0.546318	0.603512	0.67038
6.6	0.201547	0.278999	0.363909	0.449597	0.510571	0.55695	0.607499	0.679114
6.7	0.203419	0.286247	0.363016	0.45848	0.516845	0.561595	0.614995	0.689794
6.8	0.207962	0.291189	0.372363	0.462927	0.521568	0.570874	0.627664	0.699365
6.9	0.213485	0.29719	0.377494	0.469857	0.530607	0.577355	0.634345	0.702947
7	0.216025	0.301027	0.38207	0.477168	0.538382	0.581817	0.63734	0.711022
7.1	0.221472	0.307125	0.390384	0.484524	0.543072	0.588035	0.643953	0.71844
7.2	0.227277	0.309877	0.396404	0.484248	0.55052	0.596528	0.651042	0.721468
7.3	0.230355	0.315163	0.399159	0.496956	0.556615	0.600356	0.658371	0.732268
7.4	0.232113	0.31923	0.405628	0.501436	0.560904	0.607199	0.664115	0.740273
7.5	0.235534	0.322731	0.412678	0.505554	0.571338	0.617059	0.669485	0.746527
7.6	0.240934	0.335094	0.417668	0.513757	0.572503	0.615184	0.674409	0.74892
7.7	0.244318	0.334627	0.424667	0.521583	0.582557	0.624501	0.688332	0.759004
7.8	0.249727	0.341917	0.432097	0.521658	0.586205	0.634576	0.68699	0.764263
7.9	0.254638	0.345265	0.438069	0.534087	0.589939	0.640719	0.695673	0.769225
8	0.257061	0.350192	0.44042	0.538471	0.591925	0.643884	0.697622	0.777566
8.1	0.260089	0.354819	0.447953	0.546129	0.601407	0.648595	0.708015	0.782232
8.2	0.265489	0.360036	0.450145	0.548771	0.608502	0.654498	0.712995	0.789064
8.3	0.269652	0.362663	0.454481	0.55483	0.613528	0.66006	0.715945	0.795069
8.4	0.272252	0.365637	0.459282	0.558085	0.617607	0.664388	0.72502	0.798561
8.5	0.273827	0.373696	0.467944	0.563695	0.623689	0.669991	0.726655	0.80706
8.6	0.279496	0.376832	0.472706	0.567376	0.634166	0.674037	0.735586	0.813377
8.7	0.285325	0.385993	0.475512	0.572179	0.632048	0.6792	0.736293	0.815416
8.8	0.287738	0.386994	0.48338	0.582506	0.638397	0.685993	0.743076	0.820454
8.9	0.29153	0.392681	0.488384	0.586962	0.645118	0.685942	0.748237	0.823727
9	0.294327	0.394574	0.493919	0.591485	0.651632	0.696424	0.751804	0.831116
9.1	0.297855	0.398551	0.498205	0.591886	0.652162	0.702244	0.753481	0.836162
9.2	0.302638	0.404514	0.497306	0.596067	0.658709	0.70239	0.76134	0.842487
9.3	0.305394	0.408611	0.507567	0.603195	0.660195	0.709815	0.766311	0.845455
9.4	0.309766	0.413442	0.511652	0.608846	0.668943	0.714056	0.774999	0.84872
9.5	0.315439	0.419537	0.515551	0.609359	0.672192	0.717563	0.770471	0.849576
9.6	0.31705	0.421726	0.520109	0.622096	0.677784	0.717652	0.778387	0.861631
9.7	0.319413	0.426167	0.525324	0.622761	0.681962	0.726014	0.784934	0.865698
9.8	0.321698	0.430549	0.530406	0.626615	0.682058	0.729312	0.784245	0.860637
9.9	0.330368	0.433044	0.533754	0.632114	0.686871	0.735119	0.795377	0.868543
10	0.33177	0.440771	0.537013	0.632563	0.690911	0.738536	0.79352	0.875575
10.1	0.335636	0.443418	0.546785	0.637897	0.696562	0.738476	0.798405	0.880846
10.2	0.338029	0.449651	0.546369	0.640015	0.702534	0.746646	0.800361	0.882796
10.3	0.339841	0.449393	0.551173	0.645897	0.706493	0.749986	0.805784	0.888151
10.4	0.347754	0.452918	0.553761	0.653639	0.709905	0.75334	0.807441	0.884899
10.5	0.347451	0.45871	0.558552	0.653309	0.707733	0.756889	0.813002	0.89285
10.6	0.34897	0.461762	0.562494	0.660716	0.711788	0.759986	0.809807	0.895722
10.7	0.355304	0.466407	0.566309	0.660105	0.716194	0.758722	0.816851	0.901119
10.8	0.360473	0.467027	0.571898	0.664981	0.72089	0.76915	0.821526	0.902158
10.9	0.360485	0.47364	0.569912	0.672426	0.722214	0.77069	0.822514	0.909924
11	0.362845	0.477746	0.576474	0.673465	0.731327	0.773319	0.828483	0.910122
11.1	0.368566	0.478824	0.580919	0.681207	0.736811	0.775931	0.834009	0.916004
11.2	0.369931	0.485955	0.589844	0.678404	0.737611	0.779773	0.829504	0.915917
11.3	0.370623	0.489864	0.589038	0.682453	0.742717	0.781013	0.836542	0.916795
11.4	0.378808	0.493011	0.593369	0.686838	0.742513	0.782508	0.841215	0.925977
11.5	0.382393	0.495803	0.59209	0.691995	0.748452	0.786806	0.843449	0.919799
11.6	0.382462	0.49901	0.597238	0.691018	0.748324	0.786698	0.843745	0.926043
11.7	0.385664	0.502206	0.601733	0.695514	0.75384	0.791448	0.8453	0.927621
11.8	0.393265	0.504653	0.608655	0.696712	0.757395	0.799193	0.846569	0.928577
11.9	0.391321	0.508381	0.607358	0.700584	0.762553	0.793382	0.855294	0.9361
12	0.395688	0.511023	0.610308	0.705975	0.763721	0.804143	0.854782	0.93592
12.1	0.395131	0.515039	0.614791	0.707721	0.767129	0.805467	0.857609	0.935932
12.2	0.398979	0.516626	0.62188	0.70989	0.773265	0.805766	0.860376	0.948271
12.3	0.405975	0.518858	0.621994	0.711022	0.771415	0.806039	0.861993	0.944881
12.4	0.408117	0.524234	0.625968	0.717928	0.772753	0.811343	0.867423	0.946735
12.5	0.40924	0.526204	0.627927	0.720626	0.779567	0.809124	0.866438	0.949389
12.6	0.41175	0.52893	0.629685	0.724562	0.778468	0.812373	0.869337	0.952941
12.7	0.418198	0.533593	0.633474	0.725257	0.78019	0.814961	0.86899	0.950706
12.8	0.419129	0.536267	0.636214	0.729123	0.784958	0.819091	0.871245	0.955157
12.9	0.422148	0.537846	0.638637	0.730782	0.786671	0.82155	0.874327	0.954279
13	0.421723	0.54076	0.642198	0.734433	0.788432	0.826464	0.878136	0.96059
13.1	0.420091	0.541086	0.641479	0.739468	0.790759	0.8281	0.877567	0.956469
13.2	0.425341	0.54784	0.646283	0.734709	0.795898	0.826629	0.878936	0.963222
13.3	0.431142	0.548223	0.644366	0.737701	0.791028	0.828977	0.883539	0.962638
13.4	0.431672	0.555249	0.653303	0.737491	0.792957	0.834179	0.887516	0.96259
13.5	0.435266	0.556839	0.653845	0.741462	0.7993	0.834739	0.887882	0.959266
13.6	0.438471	0.556708	0.655711	0.74656	0.799187	0.832814	0.890403	0.968233
13.7	0.442645	0.560104	0.660794	0.747335	0.802661	0.838765	0.889981	0.964202
13.8	0.443754	0.561467	0.660243	0.749123	0.802283	0.834488	0.89058	0.97091
13.9	0.443915	0.565725	0.661372	0.74656	0.801798	0.838962	0.88999	0.976109
14	0.444592	0.567316	0.667499	0.754862	0.81208	0.843724	0.893641	0.975187
14.1	0.445566	0.568654	0.673666	0.756182	0.809196	0.84353	0.895585	0.971779
14.2	0.451046	0.575276	0.672657	0.761034	0.814443	0.844596	0.894812	0.977538
14.3	0.455089	0.573788	0.674687	0.761346	0.810448	0.844698	0.896082	0.974899
14.4	0.457437	0.580787	0.673965	0.758063	0.813682	0.845258	0.906211	0.974241
14.5	0.458018	0.579784	0.677116	0.760363	0.821631	0.850837	0.904378	0.97991
14.6	0.461379	0.583174	0.677766	0.765574	0.818426	0.847788	0.903132	0.979008
14.7	0.461705	0.58377	0.685026	0.768093	0.819298	0.850693	0.900823	0.983618
14.8	0.469771	0.584432	0.681009	0.76423	0.82388	0.852745	0.907522	0.980311
14.9	0.46691	0.587319	0.689216	0.771678	0.821307	0.854626	0.906926	0.975247
15	0.467482	0.591158	0.685535	0.769821	0.825871	0.849025	0.908639	0.982887
15.1	0.470142	0.592198	0.689641	0.771151	0.829426	0.853473	0.904357	0.984915
15.2	0.474922	0.593321	0.689371	0.770807	0.82524	0.854506	0.907049	0.983552
15.3	0.473661	0.594588	0.692944	0.776108	0.832613	0.858411	0.912057	0.986035
15.4	0.478932	0.601287	0.697598	0.771421	0.82942	0.859073	0.913363	0.987832
15.5	0.481628	0.598748	0.697047	0.778812	0.831825	0.861182	0.913048	0.988317
15.6	0.47992	0.60191	0.698102	0.781424	0.833257	0.860487	0.914141	0.984585
15.7	0.482104	0.602803	0.697526	0.781894	0.836114	0.857896	0.91073	0.990287
15.8	0.486021	0.603471	0.696634	0.78101	0.836036	0.863928	0.912087	0.985196
15.9	0.486246	0.607526	0.703157	0.783026	0.839948	0.864072	0.915153	0.989605
16	0.49001	0.608433	0.707709	0.780801	0.835764	0.866348	0.915752	0.990284
16.1	0.490136	0.612941	0.70298	0.787108	0.838001	0.862727	0.91813	0.989137
16.2	0.494632	0.610158	0.709084	0.790798	0.845665	0.868831	0.918834	0.989308
16.3	0.494395	0.610251	0.709288	0.786156	0.84202	0.869538	0.919544	0.991312
16.4	0.494341	0.613429	0.706796	0.787387	0.843479	0.865644	0.919373	0.993181
16.5	0.496396	0.612791	0.709246	0.791091	0.840708	0.868891	0.920988	0.993049
16.6	0.500514	0.618796	0.71455	0.792148	0.84527	0.870781	0.921293	0.9915
16.7	0.504865	0.618298	0.712612	0.794077	0.842652	0.869175	0.926055	0.994211
16.8	0.507465	0.624639	0.716098	0.789651	0.846054	0.867264	0.921982	0.994474
16.9	0.507776	0.623635	0.717167	0.796413	0.84819	0.873141	0.918696	0.993058
17	0.508274	0.623027	0.717455	0.793299	0.847944	0.867471	0.92403	0.990407
17.1	0.508417	0.627074	0.718949	0.796536	0.846971	0.870092	0.923878	0.994082
17.2	0.507408	0.627589	0.723972	0.797938	0.849007	0.870825	0.917555	0.997077
17.3	0.515932	0.626984	0.717895	0.801499	0.851589	0.874045	0.920017	0.997694
17.4	0.518322	0.630961	0.724852	0.798956	0.849954	0.874228	0.924027	0.993929
17.5	0.515264	0.63068	0.723136	0.79597	0.847456	0.870161	0.923285	0.997796
17.6	0.515288	0.633932	0.723795	0.799968	0.851248	0.878217	0.920703	0.999724
17.7	0.521448	0.634055	0.727518	0.807677	0.852026	0.876465	0.925845	0.998071
17.8	0.518127	0.637008	0.727302	0.805332	0.852407	0.874353	0.92232	0.994411
17.9	0.524605	0.63675	0.727805	0.802098	0.852218	0.878418	0.92725	0.99655
18	0.517082	0.639913	0.725221	0.805164	0.85208	0.876854	0.927798	1
18.1	0.522341	0.643426	0.728299	0.802202	0.852329	0.873662	0.924255	0.999748
18.2	0.525153	0.643971	0.73163	0.807036	0.853083	0.878819	0.924917	0.994256
18.3	0.52645	0.640677	0.731094	0.805284	0.853131	0.879175	0.926954	0.992591
18.4	0.531382	0.643486	0.731759	0.803667	0.855437	0.876962	0.923719	0.997616
18.5	0.528516	0.644558	0.734945	0.804949	0.854662	0.87807	0.932632	0.996532
18.6	0.530319	0.644944	0.735712	0.805401	0.858582	0.878975	0.925908	0.997125
18.7	0.532748	0.649098	0.735436	0.811403	0.85943	0.879253	0.926286	0.994747
18.8	0.535114	0.653333	0.738114	0.810495	0.85698	0.880879	0.926055	0.999482
18.9	0.534279	0.648562	0.734607	0.808186	0.856558	0.875725	0.925483	0.996661
19	0.536102	0.651725	0.738401	0.809193	0.855135	0.879274	0.923836	0.993258
19.1	0.536375	0.652584	0.737155	0.809375	0.858609	0.875992	0.929694	0.990785
19.2	0.534884	0.654316	0.739366	0.810792	0.858259	0.884443	0.928756	0.989074
19.3	0.538672	0.652884	0.742627	0.80812	0.85264	0.883955	0.929155	0.996292
19.4	0.540017	0.655663	0.740911	0.811385	0.854994	0.876591	0.922877	0.989826
19.5	0.539373	0.655439	0.742531	0.809783	0.856099	0.875821	0.924737	0.992752
19.6	0.540667	0.654211	0.741369	0.815284	0.857624	0.885827	0.929598	0.999539
19.7	0.544371	0.653803	0.742277	0.811876	0.860798	0.879975	0.921048	0.995079
19.8	0.546067	0.656403	0.747692	0.811235	0.856647	0.881931	0.924315	0.997029
19.9	0.543105	0.658188	0.74591	0.810672	0.857166	0.882425	0.925642	0.993432
20	0.548136	0.658745	0.746401	0.812188	0.854099	0.878573	0.925956	0.993809
20.1	0.549376	0.661926	0.745988	0.814239	0.85509	0.88014	0.928283	0.988305
20.2	0.547307	0.656208	0.745311	0.814161	0.857097	0.880981	0.926085	0.995942
20.3	0.547085	0.658703	0.748273	0.815233	0.859996	0.876067	0.923045	0.992908
20.4	0.551047	0.661432	0.747994	0.818594	0.858142	0.881949	0.92704	0.99
20.5	0.551134	0.663181	0.746533	0.814667	0.857261	0.883132	0.924393	0.992216
20.6	0.548373	0.662471	0.749129	0.817207	0.860577	0.881784	0.924204	0.991216
20.7	0.553443	0.664885	0.749782	0.816683	0.85842	0.88176	0.925597	0.99209
20.8	0.55453	0.660886	0.747925	0.810097	0.860032	0.880981	0.922195	0.993163
20.9	0.553302	0.668245	0.750516	0.816144	0.858567	0.881436	0.924114	0.989715
21	0.557798	0.666068	0.748991	0.817096	0.862065	0.879448	0.922985	0.991509
21.1	0.556252	0.663049	0.750159	0.815719	0.856387	0.877312	0.925777	0.987433
21.2	0.55229	0.668733	0.752882	0.815506	0.861856	0.881035	0.925222	0.99032
21.3	0.557909	0.670458	0.755074	0.818441	0.859915	0.880343	0.92805	0.988428
21.4	0.557283	0.673507	0.750827	0.812203	0.858687	0.878669	0.917394	0.992013
21.5	0.565528	0.671518	0.753286	0.816057	0.856989	0.877333	0.924408	0.991632
21.6	0.562608	0.667017	0.754598	0.813676	0.859244	0.876408	0.923512	0.994199
21.7	0.562302	0.671099	0.75184	0.81612	0.853572	0.878807	0.918175	0.99168
21.8	0.562671	0.67519	0.751244	0.819921	0.854147	0.880265	0.922192	0.987739
21.9	0.565105	0.674448	0.754421	0.817237	0.858858	0.877321	0.920574	0.986954
22	0.5658	0.670368	0.757662	0.818312	0.862919	0.87627	0.923066	0.988101
22.1	0.559804	0.669802	0.750905	0.817569	0.86019	0.876061	0.923198	0.986415
22.2	0.565878	0.673109	0.754496	0.817758	0.864063	0.876684	0.915639	0.981476
22.3	0.565609	0.668907	0.755425	0.816776	0.855518	0.881209	0.91861	0.988395
22.4	0.566339	0.673965	0.754751	0.823664	0.857785	0.881035	0.919059	0.982698
22.5	0.566249	0.673315	0.754823	0.820313	0.855027	0.875345	0.91672	0.983887
22.6	0.566657	0.672561	0.756227	0.820442	0.860975	0.879643	0.920239	0.983094
22.7	0.568669	0.676766	0.751834	0.812149	0.855497	0.877175	0.921401	0.982117
22.8	0.569014	0.673564	0.751136	0.820118	0.857294	0.876618	0.917286	0.983336
22.9	0.5702	0.677628	0.758938	0.816515	0.858058	0.877061	0.91855	0.982755
23	0.570793	0.673447	0.755595	0.816114	0.853718	0.877753	0.919086	0.981602
23.1	0.572817	0.678311	0.757371	0.814605	0.859783	0.873245	0.919376	0.984247
23.2	0.574378	0.675855	0.760291	0.815446	0.857642	0.874039	0.915034	0.982123
23.3	0.572081	0.676939	0.759204	0.814449	0.855806	0.871341	0.917076	0.982923
23.4	0.571961	0.675801	0.755925	0.812062	0.854102	0.877429	0.914429	0.974615
23.5	0.575111	0.67749	0.754068	0.81317	0.855629	0.873862	0.917618	0.979068
23.6	0.573392	0.678443	0.753819	0.813167	0.858771	0.875602	0.917576	0.977259
23.7	0.576561	0.677359	0.758084	0.817668	0.853796	0.874548	0.913503	0.977622
23.8	0.57639	0.676562	0.761043	0.818741	0.855857	0.874869	0.915291	0.977391
23.9	0.574707	0.679674	0.761804	0.810388	0.852538	0.877369	0.915705	0.975858
24	0.576085	0.679197	0.756137	0.818986	0.855554	0.872488	0.912	0.976319
24.1	0.572674	0.682079	0.75936	0.814784	0.857492	0.869795	0.907717	0.972375
24.2	0.576935	0.679221	0.759567	0.814548	0.855261	0.87521	0.914758	0.972441
24.3	0.576573	0.678092	0.757707	0.815236	0.853215	0.865944	0.910445	0.976017
24.4	0.574336	0.67566	0.760148	0.810909	0.852976	0.867085	0.912171	0.968874
24.5	0.577513	0.676661	0.753804	0.816959	0.85176	0.871179	0.908313	0.970368
24.6	0.578577	0.679796	0.759072	0.813547	0.855351	0.866489	0.906217	0.971608
24.7	0.578649	0.683004	0.755386	0.815964	0.854779	0.87418	0.912557	0.969464
24.8	0.579514	0.67755	0.759528	0.817264	0.84975	0.868609	0.913521	0.96761
24.9	0.580895	0.679701	0.754203	0.812523	0.849379	0.870789	0.911958	0.97109
25	0.58288	0.682869	0.757057	0.812834	0.853796	0.865929	0.90931	0.96448
25.1	0.579951	0.683573	0.755535	0.812385	0.852365	0.873823	0.908987	0.963297
25.2	0.584516	0.680054	0.758417	0.818681	0.853212	0.870694	0.905881	0.968742
25.3	0.581476	0.684298	0.757659	0.808492	0.847755	0.865306	0.904512	0.965998
25.4	0.580793	0.680967	0.757425	0.810903	0.84774	0.867133	0.904875	0.965013
25.5	0.583357	0.681773	0.750507	0.809669	0.853	0.865635	0.904791	0.965094
25.6	0.583941	0.678916	0.754352	0.812676	0.848759	0.865734	0.901847	0.963318
25.7	0.586807	0.680557	0.753127	0.806976	0.844527	0.862727	0.903096	0.964699
25.8	0.582925	0.680437	0.756203	0.812247	0.849651	0.865881	0.901604	0.963848
25.9	0.582401	0.681749	0.754835	0.81237	0.847627	0.86503	0.90191	0.956352
26	0.582314	0.679449	0.755532	0.810687	0.845836	0.861331	0.897998	0.957888
26.1	0.584252	0.683645	0.755496	0.811274	0.843461	0.859364	0.90096	0.961689
26.2	0.585567	0.682411	0.755122	0.808678	0.847177	0.863107	0.903018	0.956532
26.3	0.582581	0.683139	0.756907	0.807881	0.845554	0.858843	0.898337	0.958921
26.4	0.583626	0.676688	0.759908	0.810175	0.846009	0.85825	0.899463	0.958239
26.5	0.586402	0.685589	0.75576	0.809744	0.844419	0.860918	0.898553	0.958832
26.6	0.586106	0.682285	0.754068	0.802074	0.845557	0.858762	0.898532	0.953441
26.7	0.588047	0.682863	0.757623	0.805698	0.843533	0.860062	0.89601	0.956424
26.8	0.585824	0.681276	0.753768	0.804191	0.848378	0.856441	0.896124	0.952632
26.9	0.584812	0.68156	0.754266	0.806398	0.845662	0.859918	0.898577	0.953012
27	0.588595	0.680985	0.757183	0.805572	0.840481	0.857136	0.892697	0.951994
27.1	0.583063	0.683085	0.749947	0.807429	0.840517	0.853245	0.893147	0.946136
27.2	0.588646	0.684678	0.753807	0.805263	0.841505	0.856842	0.894752	0.956319
27.3	0.586046	0.682809	0.753391	0.805856	0.837052	0.855812	0.894815	0.950473
27.4	0.589969	0.68248	0.754577	0.808384	0.842511	0.855842	0.893275	0.948724
27.5	0.58825	0.686104	0.753744	0.803961	0.841511	0.852682	0.890751	0.948915
27.6	0.586022	0.687005	0.752933	0.804724	0.836977	0.85314	0.89244	0.947831
27.7	0.587873	0.685541	0.754541	0.805668	0.841831	0.85465	0.888325	0.943611
27.8	0.583818	0.678428	0.752768	0.806806	0.838522	0.851565	0.893737	0.944645
27.9	0.584578	0.681668	0.756107	0.803826	0.835288	0.849136	0.890763	0.944699
28	0.592856	0.680479	0.750746	0.800645	0.838462	0.848067	0.889104	0.945627
28.1	0.584968	0.680147	0.752316	0.805281	0.832538	0.850436	0.88739	0.945864
28.2	0.587469	0.682124	0.749018	0.800226	0.834305	0.84845	0.886567	0.936741
28.3	0.592263	0.681198	0.752295	0.801684	0.836378	0.845659	0.886423	0.942452
28.4	0.588214	0.681794	0.750815	0.80267	0.836366	0.848468	0.886965	0.939475
28.5	0.587517	0.682153	0.75502	0.802002	0.838273	0.854251	0.884102	0.938996
28.6	0.590796	0.68204	0.750609	0.800313	0.831774	0.850798	0.882904	0.939937
28.7	0.590964	0.681596	0.752181	0.798004	0.8337	0.846525	0.877723	0.942479
28.8	0.589322	0.682555	0.749749	0.799112	0.832877	0.844347	0.881727	0.935226
28.9	0.588166	0.682291	0.750423	0.796761	0.8306	0.84754	0.881802	0.9371
29	0.588697	0.682417	0.749	0.797584	0.831205	0.849037	0.883808	0.935471
29.1	0.589616	0.679638	0.743064	0.800151	0.832023	0.84692	0.884096	0.935606
29.2	0.589089	0.679174	0.749177	0.799492	0.828381	0.844407	0.880763	0.930275
29.3	0.590982	0.678227	0.748797	0.798537	0.830571	0.842017	0.877447	0.925821
29.4	0.589472	0.677997	0.748659	0.797674	0.825889	0.844174	0.884806	0.929625
29.5	0.587187	0.681441	0.74951	0.796671	0.826479	0.843005	0.872928	0.926106
29.6	0.587433	0.680039	0.746997	0.794601	0.8276	0.843068	0.876624	0.929346
29.7	0.589212	0.678473	0.748629	0.791112	0.825907	0.845171	0.875854	0.929071
29.8	0.592815	0.680078	0.748138	0.796644	0.830894	0.835593	0.870769	0.918978
29.9	0.591922	0.681285	0.746584	0.793478	0.823032	0.840026	0.873069	0.932743

## Sheet: DLDD n=1
x correct	19	17.2667	15.5333	13.8	12.0666	10.3333	8.59996	6.86662
time	18	38.82	83.58	180	388	703.7	1693	3035
0	0.00326435	0.00375154	0.00364799	0.0039858	0.00491435	0.00637253	0.00878472	0.0129233
0.1	0.00332037	0.00367685	0.00361235	0.00463935	0.0058429	0.00789352	0.0112105	0.0160943
0.2	0.00329321	0.00410463	0.0042642	0.00503318	0.0066	0.00958765	0.0137704	0.0202991
0.3	0.00352747	0.0041267	0.00441867	0.00573765	0.00796991	0.0115721	0.0169448	0.0256531
0.4	0.00360725	0.00420139	0.00508071	0.00628596	0.0094145	0.014519	0.0203907	0.031423
0.5	0.0037091	0.00448318	0.00494321	0.00697515	0.0105247	0.0165679	0.024711	0.0372336
0.6	0.0035767	0.00440509	0.00567654	0.00748441	0.0126432	0.0196931	0.0294471	0.0463664
0.7	0.00363102	0.00471574	0.00589722	0.00841296	0.0140742	0.023358	0.0343461	0.0549355
0.8	0.00383812	0.00468518	0.00663904	0.00972346	0.0163795	0.0266886	0.0395728	0.0620397
0.9	0.00376003	0.00526744	0.00695478	0.0108863	0.0184674	0.0309952	0.0458944	0.0726119
1	0.00403673	0.00550509	0.00754383	0.0117944	0.0210086	0.0351813	0.0520904	0.0809858
1.1	0.00441867	0.00554244	0.0081821	0.0129556	0.023139	0.0400091	0.0597412	0.0905802
1.2	0.00414197	0.00616373	0.00881358	0.013879	0.0265545	0.0440305	0.065141	0.100681
1.3	0.00459012	0.00607716	0.00950447	0.0150333	0.0289904	0.0490637	0.073206	0.11366
1.4	0.00462917	0.0063233	0.0103498	0.0167495	0.0312532	0.0544076	0.0802168	0.126395
1.5	0.00487022	0.00713812	0.0107844	0.018739	0.0352272	0.0595205	0.0887554	0.137548
1.6	0.00519954	0.00703117	0.0118165	0.0195589	0.0387207	0.0658642	0.0984805	0.1505
1.7	0.0051588	0.00737407	0.0124853	0.0211852	0.0415029	0.0720092	0.106987	0.161332
1.8	0.00555093	0.00765247	0.0134971	0.0233665	0.0454565	0.0786126	0.114801	0.174192
1.9	0.00558997	0.00798858	0.0143373	0.0250539	0.0487208	0.0833046	0.124896	0.18654
2	0.00584969	0.00838241	0.0152914	0.0270434	0.0522076	0.0905259	0.133409	0.200409
2.1	0.00597191	0.00855216	0.016152	0.02796	0.0560355	0.0971259	0.140917	0.21467
2.2	0.00614676	0.00932454	0.0170873	0.0299971	0.0604525	0.102488	0.15143	0.226936
2.3	0.0062537	0.00954012	0.0180057	0.0317846	0.0638288	0.111002	0.163603	0.240747
2.4	0.00672562	0.00997469	0.0191549	0.0343852	0.0674751	0.117868	0.172226	0.253241
2.5	0.00682747	0.0100833	0.019581	0.0368008	0.0740038	0.125004	0.182367	0.267533
2.6	0.00695818	0.0104992	0.0211122	0.0389176	0.0769083	0.132003	0.192368	0.28087
2.7	0.00718565	0.0111528	0.0219932	0.0404606	0.0812404	0.140489	0.201521	0.295813
2.8	0.00763549	0.0120117	0.022898	0.0415114	0.0855199	0.147617	0.21415	0.312487
2.9	0.00781713	0.0122426	0.024587	0.0450609	0.0902204	0.154124	0.223344	0.320852
3	0.00825679	0.0121051	0.0255614	0.0468349	0.0949938	0.163936	0.234775	0.337191
3.1	0.00833488	0.0130914	0.0259841	0.0497122	0.100383	0.170838	0.244881	0.352443
3.2	0.00854367	0.0134275	0.0282231	0.0521651	0.106362	0.181564	0.256768	0.365816
3.3	0.00882716	0.0136838	0.0292501	0.0534179	0.110188	0.18592	0.266093	0.379369
3.4	0.00913441	0.0141744	0.0306693	0.056341	0.113918	0.194461	0.276394	0.393387
3.5	0.00925494	0.0154407	0.0314773	0.0596818	0.121131	0.203325	0.287265	0.406424
3.6	0.00924984	0.0154645	0.0330153	0.0621805	0.125916	0.210387	0.297794	0.421217
3.7	0.00989151	0.0159076	0.0342799	0.0652412	0.13053	0.218437	0.309462	0.432448
3.8	0.0103498	0.0168548	0.0356227	0.0666671	0.135062	0.227415	0.320681	0.449202
3.9	0.0106045	0.0173657	0.036833	0.0686855	0.14128	0.236059	0.328717	0.463509
4	0.0106656	0.017583	0.0390636	0.0718157	0.147408	0.244022	0.34218	0.478731
4.1	0.0107216	0.0185981	0.0402807	0.0750835	0.151966	0.251345	0.35291	0.48675
4.2	0.0112869	0.0187713	0.0415623	0.0780711	0.158252	0.261518	0.363501	0.499614
4.3	0.0116332	0.0195165	0.042608	0.081383	0.163953	0.270104	0.3739	0.514734
4.4	0.0119455	0.0204009	0.0442427	0.0837477	0.170094	0.277714	0.38364	0.526204
4.5	0.0123122	0.0202515	0.0458367	0.0864688	0.174647	0.286487	0.394284	0.539889
4.6	0.0128079	0.0210579	0.0474579	0.0893444	0.181709	0.2949	0.40719	0.550764
4.7	0.0133562	0.0220781	0.0486258	0.0920214	0.186328	0.302201	0.417277	0.561723
4.8	0.0130506	0.0227367	0.0496188	0.0953961	0.192138	0.311431	0.426866	0.574758
4.9	0.0137619	0.023061	0.0520802	0.0990254	0.197886	0.318883	0.436897	0.586351
5	0.0139469	0.0240761	0.0532108	0.100643	0.202549	0.327297	0.446683	0.596376
5.1	0.0143866	0.0239284	0.0544755	0.104578	0.208908	0.336242	0.455313	0.609295
5.2	0.0147023	0.0252949	0.0570099	0.108056	0.216289	0.342769	0.463405	0.617477
5.3	0.0151403	0.0258755	0.0591572	0.110574	0.219672	0.352363	0.47321	0.630964
5.4	0.0155171	0.0266258	0.0599245	0.113697	0.226999	0.360077	0.484564	0.638514
5.5	0.015692	0.0271282	0.0617426	0.116856	0.233526	0.367789	0.497144	0.652952
5.6	0.0162301	0.0283182	0.0639613	0.121207	0.236994	0.376826	0.504757	0.660192
5.7	0.0170381	0.0285491	0.0652361	0.122511	0.242978	0.385351	0.511245	0.669055
5.8	0.0171094	0.0292179	0.0667011	0.125953	0.250287	0.393516	0.523383	0.679684
5.9	0.0175711	0.0299733	0.069412	0.128505	0.255687	0.402653	0.531018	0.689459
6	0.0176272	0.0300989	0.070366	0.132231	0.262759	0.407518	0.5402	0.698622
6.1	0.0177477	0.0320035	0.0731211	0.136655	0.266755	0.41569	0.54937	0.705497
6.2	0.0182807	0.032141	0.0734505	0.139345	0.27453	0.42307	0.558494	0.713615
6.3	0.0184708	0.0327827	0.0760392	0.143816	0.278353	0.430529	0.567793	0.727416
6.4	0.0194877	0.0340406	0.0768846	0.14685	0.286754	0.438501	0.574042	0.737764
6.5	0.0198645	0.0349233	0.0797381	0.149412	0.290359	0.444466	0.583954	0.740373
6.6	0.0199103	0.035166	0.0812099	0.154087	0.296879	0.454078	0.591238	0.75064
6.7	0.020058	0.0356006	0.0829091	0.154859	0.302507	0.460577	0.599116	0.755394
6.8	0.0209849	0.0367651	0.084717	0.160483	0.30781	0.466188	0.6081	0.766303
6.9	0.0212752	0.0374356	0.0870324	0.163414	0.313953	0.478296	0.613235	0.775663
7	0.0222139	0.0377819	0.0889116	0.166477	0.320188	0.483255	0.623471	0.781002
7.1	0.0218998	0.0391892	0.0902815	0.171006	0.326916	0.488979	0.631913	0.788788
7.2	0.0224498	0.0391094	0.0916072	0.172398	0.329587	0.498405	0.636562	0.793899
7.3	0.0232477	0.0403028	0.0929177	0.176704	0.338404	0.504613	0.643653	0.804394
7.4	0.0228386	0.0420495	0.0952858	0.179785	0.341964	0.512136	0.651889	0.810096
7.5	0.0238011	0.0422923	0.0979119	0.184518	0.349486	0.516739	0.659421	0.817164
7.6	0.0237603	0.0423958	0.0986842	0.186204	0.355003	0.527009	0.666048	0.822869
7.7	0.0240472	0.0438693	0.101071	0.190395	0.359764	0.529988	0.67292	0.828711
7.8	0.0252525	0.0448606	0.102874	0.19188	0.365494	0.535932	0.678311	0.835457
7.9	0.0254205	0.0452867	0.104807	0.198236	0.372936	0.543801	0.682652	0.840649
8	0.0256819	0.0459725	0.107126	0.200049	0.374217	0.547936	0.693195	0.846847
8.1	0.0265375	0.0464631	0.109571	0.20312	0.382438	0.555099	0.694832	0.853119
8.2	0.0267378	0.0478772	0.111497	0.207252	0.387595	0.561917	0.699892	0.854663
8.3	0.0273031	0.0493625	0.112643	0.209511	0.391201	0.567411	0.710169	0.861201
8.4	0.0278191	0.0496816	0.116726	0.213874	0.396981	0.572984	0.71575	0.865057
8.5	0.0286272	0.0505762	0.117102	0.218223	0.403697	0.578136	0.719225	0.87221
8.6	0.0287969	0.050987	0.11851	0.219199	0.41158	0.579697	0.723286	0.878852
8.7	0.0290057	0.0517645	0.120272	0.225593	0.413439	0.58659	0.732062	0.878739
8.8	0.0294386	0.053642	0.123185	0.227763	0.420319	0.59344	0.73746	0.886288
8.9	0.0300853	0.0536454	0.124378	0.231297	0.424064	0.598658	0.740729	0.887148
9	0.0301193	0.0536012	0.12615	0.234247	0.425669	0.605105	0.744902	0.896512
9.1	0.0315758	0.0550272	0.12973	0.237537	0.433495	0.612169	0.748876	0.897753
9.2	0.0317336	0.0559829	0.130642	0.240134	0.440117	0.613956	0.755401	0.902782
9.3	0.0314094	0.0572017	0.133013	0.245874	0.441657	0.621483	0.759759	0.907697
9.4	0.0320969	0.0576583	0.13328	0.248564	0.448858	0.626871	0.764761	0.911346
9.5	0.0323159	0.0587464	0.136711	0.252616	0.45504	0.629266	0.767998	0.913215
9.6	0.0328421	0.0595901	0.137775	0.255855	0.459218	0.635253	0.778657	0.919843
9.7	0.033971	0.0602284	0.14027	0.257154	0.462669	0.641751	0.77568	0.926276
9.8	0.0342731	0.0613505	0.14227	0.261354	0.469435	0.64561	0.781253	0.922698
9.9	0.0348741	0.0623062	0.144804	0.265694	0.471341	0.650346	0.786809	0.92953
10	0.0346313	0.0628782	0.146091	0.267823	0.478666	0.649973	0.790316	0.931685
10.1	0.0353273	0.0640359	0.148935	0.272029	0.478901	0.658408	0.792473	0.938329
10.2	0.0354971	0.0644009	0.151333	0.276869	0.485826	0.662504	0.797451	0.936775
10.3	0.0364256	0.0659355	0.152448	0.279273	0.49104	0.666174	0.800674	0.937465
10.4	0.0364952	0.0666739	0.154895	0.282922	0.49613	0.670083	0.806044	0.939678
10.5	0.0367363	0.0682798	0.156539	0.284557	0.500619	0.674663	0.807539	0.946489
10.6	0.037473	0.0685684	0.158456	0.290478	0.500946	0.676906	0.810854	0.949184
10.7	0.0380264	0.069631	0.160967	0.294168	0.509251	0.682725	0.814528	0.952052
10.8	0.037585	0.0691693	0.162168	0.294255	0.514617	0.686767	0.818614	0.954808
10.9	0.0387478	0.0709466	0.164559	0.298176	0.5162	0.690365	0.821652	0.956898
11	0.0399497	0.0720975	0.165991	0.30133	0.520758	0.693294	0.822674	0.96116
11.1	0.0402298	0.0718565	0.168417	0.303322	0.525002	0.698738	0.828342	0.956603
11.2	0.0398682	0.0737883	0.169919	0.309231	0.530195	0.696359	0.829398	0.96059
11.3	0.0398156	0.0740395	0.171045	0.30993	0.533106	0.705806	0.830685	0.962391
11.4	0.0408579	0.0751412	0.173995	0.313001	0.534532	0.705349	0.836356	0.964881
11.5	0.0421972	0.0765569	0.175666	0.315995	0.54157	0.709274	0.839144	0.971196
11.6	0.0417355	0.0770339	0.17984	0.319805	0.545632	0.715261	0.84131	0.968944
11.7	0.0427608	0.0782239	0.180296	0.323643	0.546958	0.717757	0.843209	0.969964
11.8	0.043669	0.0791185	0.181688	0.32553	0.549776	0.720766	0.842668	0.973077
11.9	0.0433074	0.0798332	0.18547	0.327988	0.55494	0.723143	0.848699	0.975656
12	0.0437725	0.0807532	0.186501	0.330794	0.559727	0.724346	0.851266	0.977942
12.1	0.0442852	0.0824592	0.187721	0.335143	0.562251	0.72776	0.852532	0.975708
12.2	0.0440221	0.0822878	0.19111	0.33908	0.566374	0.732902	0.854863	0.978418
12.3	0.0453529	0.0825034	0.190266	0.340603	0.568014	0.733949	0.858462	0.979008
12.4	0.0461864	0.0839208	0.194198	0.344833	0.571029	0.737215	0.860195	0.981225
12.5	0.0465072	0.0848511	0.196751	0.348165	0.577697	0.738611	0.861814	0.984391
12.6	0.0465819	0.0856676	0.198625	0.350131	0.577763	0.743975	0.865389	0.98642
12.7	0.0472694	0.0870579	0.198638	0.35336	0.581498	0.744041	0.864189	0.985985
12.8	0.0480724	0.0876825	0.201539	0.357055	0.585275	0.745034	0.866319	0.988015
12.9	0.0483253	0.0896042	0.205046	0.358741	0.589608	0.751448	0.868686	0.98561
13	0.0492267	0.0900099	0.20625	0.363591	0.590761	0.752201	0.872208	0.988917
13.1	0.0484322	0.089998	0.206589	0.364915	0.59279	0.754505	0.871589	0.988508
13.2	0.0491367	0.0909707	0.207336	0.366909	0.599659	0.758963	0.871434	0.988533
13.3	0.0500975	0.0917702	0.210845	0.371735	0.598352	0.759893	0.876841	0.991876
13.4	0.0497597	0.0934202	0.213335	0.374073	0.603467	0.76004	0.878754	0.98792
13.5	0.0511704	0.0945355	0.213152	0.37675	0.605557	0.762648	0.884398	0.995552
13.6	0.050802	0.0934304	0.217579	0.37659	0.60876	0.760791	0.878959	0.989781
13.7	0.0514793	0.0947069	0.219659	0.381924	0.610704	0.766466	0.878002	0.993076
13.8	0.0523858	0.0965352	0.220134	0.381496	0.615333	0.769907	0.884553	0.993313
13.9	0.0530886	0.0986316	0.221098	0.38829	0.619707	0.767605	0.881551	0.993826
14	0.0526693	0.0981037	0.223247	0.390447	0.619483	0.772163	0.884059	0.991954
14.1	0.053625	0.0996926	0.22551	0.39396	0.623194	0.772746	0.882894	0.996347
14.2	0.0540782	0.0988065	0.227953	0.394048	0.628563	0.775079	0.885364	0.996204
14.3	0.0539577	0.100066	0.229924	0.395781	0.625632	0.778177	0.88999	0.999913
14.4	0.0550984	0.103008	0.231545	0.400738	0.62994	0.777491	0.888216	0.995373
14.5	0.0555093	0.101619	0.233285	0.404053	0.63077	0.783035	0.889004	0.997749
14.6	0.0556773	0.102729	0.236458	0.402118	0.634574	0.781341	0.892339	1
14.7	0.0567926	0.104434	0.236575	0.405333	0.637326	0.783643	0.892222	0.998591
14.8	0.0563241	0.106902	0.239866	0.409078	0.641373	0.78204	0.892222	0.994522
14.9	0.0564836	0.106946	0.24088	0.411799	0.640991	0.784682	0.892971	0.999302
15	0.0576125	0.108128	0.243024	0.416386	0.646072	0.785962	0.893334	0.996384
15.1	0.0593151	0.10938	0.24373	0.418453	0.64781	0.790654	0.897123	0.995681
15.2	0.0594866	0.108623	0.243901	0.42028	0.644851	0.792346	0.893689	0.99908
15.3	0.059838	0.109698	0.24814	0.42092	0.649973	0.794801	0.896447	0.997815
15.4	0.0594238	0.110937	0.249294	0.425381	0.655106	0.789498	0.897608	0.995527
15.5	0.0603608	0.111733	0.250533	0.427202	0.654481	0.791616	0.896598	0.999874
15.6	0.0605849	0.112857	0.252706	0.43146	0.656788	0.792241	0.895558	0.995391
15.7	0.0603659	0.113056	0.255344	0.431015	0.658784	0.796081	0.895349	0.994957
15.8	0.060977	0.113451	0.254446	0.434637	0.661804	0.795955	0.900209	0.998834
15.9	0.061364	0.114604	0.257335	0.434359	0.663468	0.795787	0.898622	0.991407
16	0.0610839	0.116111	0.260257	0.43957	0.664731	0.798505	0.898713	0.994636
16.1	0.062537	0.116809	0.261971	0.439922	0.665008	0.799644	0.897853	0.994566
16.2	0.062279	0.117411	0.263859	0.442298	0.66622	0.802492	0.899637	0.99314
16.3	0.0627832	0.118863	0.266139	0.443234	0.668051	0.802373	0.899552	0.992774
16.4	0.0641887	0.118493	0.266663	0.447805	0.670559	0.800432	0.900784	0.997508
16.5	0.0644128	0.118971	0.268157	0.447955	0.668247	0.805648	0.904193	0.993079
16.6	0.0652989	0.119684	0.270339	0.449316	0.671825	0.805239	0.901523	0.996865
16.7	0.0650731	0.122295	0.271489	0.452604	0.673112	0.801289	0.903018	0.992405
16.8	0.0650103	0.122701	0.270235	0.457279	0.67589	0.805663	0.898769	0.990959
16.9	0.0661596	0.123062	0.273397	0.457274	0.676824	0.807519	0.907775	0.993351
17	0.0664176	0.12367	0.277159	0.457481	0.678269	0.809396	0.90208	0.988073
17.1	0.06591	0.124381	0.278638	0.460214	0.680737	0.80484	0.899263	0.989901
17.2	0.0658234	0.124806	0.280286	0.462039	0.680854	0.805427	0.900131	0.988693
17.3	0.0670304	0.12613	0.279697	0.461786	0.684005	0.806137	0.903395	0.993492
17.4	0.0688807	0.12577	0.282405	0.464911	0.682217	0.808004	0.900168	0.988304
17.5	0.0680336	0.128209	0.281177	0.466784	0.68585	0.81243	0.900674	0.991006
17.6	0.0692066	0.128605	0.286642	0.472068	0.688318	0.812032	0.905709	0.983675
17.7	0.0697261	0.128335	0.287945	0.472292	0.68722	0.808858	0.902893	0.986948
17.8	0.069979	0.130021	0.289288	0.473355	0.690496	0.811869	0.900885	0.984576
17.9	0.0703966	0.130435	0.290755	0.477461	0.690931	0.8118	0.90017	0.985765
18	0.0704951	0.131569	0.290223	0.47611	0.690338	0.80869	0.900667	0.984288
18.1	0.0702863	0.132854	0.291519	0.481963	0.69164	0.807155	0.904511	0.982458
18.2	0.0716782	0.132302	0.29482	0.481757	0.69357	0.810685	0.900094	0.984019
18.3	0.0715322	0.133618	0.29564	0.482681	0.696157	0.808031	0.899426	0.984062
18.4	0.0719295	0.134799	0.297754	0.484003	0.693603	0.813866	0.901592	0.981293
18.5	0.0722011	0.134794	0.299025	0.485725	0.695227	0.811211	0.901574	0.98147
18.6	0.0740259	0.136008	0.302281	0.486168	0.695682	0.811713	0.902008	0.979423
18.7	0.0733893	0.136514	0.300093	0.487156	0.695789	0.813419	0.901051	0.973658
18.8	0.0740395	0.137441	0.301296	0.489636	0.699984	0.809296	0.898245	0.978234
18.9	0.0742211	0.138989	0.307036	0.492922	0.700267	0.811211	0.89807	0.977007
19	0.0752363	0.139491	0.303585	0.495412	0.699298	0.817011	0.897484	0.977762
19.1	0.0747355	0.140323	0.308311	0.493521	0.700729	0.811959	0.896104	0.976389
19.2	0.0751123	0.140423	0.30857	0.496001	0.700493	0.814745	0.896108	0.970264
19.3	0.0751395	0.140131	0.310823	0.497556	0.702863	0.813718	0.900335	0.975004
19.4	0.0765315	0.141615	0.312257	0.500291	0.702874	0.814076	0.895379	0.973661
19.5	0.0760613	0.14427	0.312193	0.500982	0.70481	0.814494	0.896537	0.967767
19.6	0.0775687	0.14246	0.31489	0.502552	0.705136	0.811016	0.895987	0.969158
19.7	0.0773785	0.1443	0.315466	0.503909	0.705378	0.812051	0.896537	0.971758
19.8	0.0788775	0.145733	0.316496	0.502885	0.703421	0.811438	0.896554	0.96894
19.9	0.0780694	0.145942	0.317454	0.505947	0.708301	0.81348	0.895318	0.964978
20	0.0782579	0.146395	0.318258	0.507954	0.707763	0.814092	0.888493	0.966934
20.1	0.0779998	0.147682	0.320658	0.510902	0.706988	0.80941	0.889737	0.962512
20.2	0.0800097	0.148456	0.324581	0.512345	0.708242	0.814115	0.890567	0.965167
20.3	0.0793697	0.14869	0.324646	0.513018	0.7087	0.813732	0.892068	0.965306
20.4	0.0801913	0.150664	0.324203	0.513985	0.70637	0.813117	0.887197	0.961546
20.5	0.081052	0.150271	0.324256	0.515111	0.711318	0.809024	0.888937	0.961831
20.6	0.0806174	0.151642	0.324658	0.51609	0.709503	0.815064	0.887126	0.959753
20.7	0.0813083	0.152779	0.326347	0.517195	0.710814	0.811983	0.886985	0.957563
20.8	0.0801387	0.152262	0.328642	0.519157	0.715394	0.81428	0.888321	0.955691
20.9	0.0824491	0.152375	0.332278	0.518742	0.710693	0.811019	0.887233	0.960093
21	0.0826494	0.153299	0.331207	0.520313	0.713944	0.809956	0.887264	0.958585
21.1	0.0821333	0.154642	0.331843	0.523255	0.711364	0.809298	0.887238	0.957496
21.2	0.082337	0.155587	0.333196	0.52545	0.713713	0.81201	0.885659	0.954594
21.3	0.0829838	0.155913	0.334186	0.522176	0.713024	0.80729	0.883315	0.950904
21.4	0.0835711	0.15575	0.335458	0.52518	0.710077	0.812598	0.88386	0.952951
21.5	0.0839548	0.158023	0.339024	0.5245	0.712065	0.807958	0.87946	0.950225
21.6	0.0844538	0.157921	0.336855	0.527798	0.715981	0.809546	0.884807	0.948533
21.7	0.0848748	0.158429	0.341969	0.528876	0.713969	0.810778	0.881531	0.948202
21.8	0.0853434	0.158896	0.340375	0.52882	0.714243	0.810085	0.883461	0.948022
21.9	0.0853535	0.159614	0.342772	0.529407	0.717726	0.808269	0.882191	0.943635
22	0.0863941	0.160995	0.344016	0.536143	0.714888	0.807821	0.883106	0.944233
22.1	0.0863211	0.162264	0.342005	0.532651	0.712639	0.806745	0.87861	0.943859
22.2	0.0863602	0.162544	0.345772	0.533016	0.716251	0.805555	0.877275	0.945993
22.3	0.0868813	0.16162	0.346828	0.534016	0.713722	0.804249	0.875077	0.943499
22.4	0.0875722	0.162644	0.345896	0.533366	0.716714	0.806646	0.877126	0.940405
22.5	0.0872191	0.163527	0.348289	0.534737	0.715767	0.805991	0.875839	0.938145
22.6	0.0878693	0.164963	0.351122	0.538761	0.716504	0.805361	0.875169	0.937972
22.7	0.0882003	0.162469	0.349423	0.537993	0.714725	0.807668	0.874123	0.936417
22.8	0.0881748	0.165976	0.350506	0.540872	0.717056	0.804419	0.876272	0.935925
22.9	0.0886705	0.166672	0.353986	0.539613	0.716227	0.805998	0.871107	0.936178
23	0.0897162	0.168154	0.352613	0.541962	0.715969	0.801684	0.87012	0.935322
23.1	0.0896059	0.167927	0.352927	0.54084	0.716998	0.807907	0.869922	0.930038
23.2	0.0917498	0.168258	0.356427	0.542753	0.716669	0.800061	0.871988	0.933046
23.3	0.09075	0.167721	0.355302	0.543947	0.714908	0.800919	0.864544	0.929091
23.4	0.0905989	0.169651	0.356965	0.546727	0.719588	0.802	0.871076	0.927819
23.5	0.0901049	0.169602	0.358103	0.544398	0.716735	0.800664	0.86719	0.928057
23.6	0.0904801	0.170901	0.35803	0.547664	0.716708	0.799523	0.863921	0.922815
23.7	0.0923372	0.170379	0.359147	0.547476	0.718424	0.800085	0.865968	0.923438
23.8	0.0921012	0.16994	0.36365	0.545756	0.716672	0.800644	0.864476	0.922465
23.9	0.0916836	0.172703	0.361596	0.5481	0.718135	0.7988	0.866258	0.918955
24	0.0919688	0.17167	0.36417	0.547561	0.716709	0.800654	0.863418	0.921549
24.1	0.0931724	0.1724	0.363558	0.550535	0.717273	0.797972	0.866155	0.921126
24.2	0.0926988	0.175009	0.362346	0.549747	0.718928	0.797615	0.861424	0.914575
24.3	0.0934219	0.174362	0.366168	0.549654	0.717597	0.797592	0.861879	0.915056
24.4	0.0936867	0.176355	0.366473	0.547732	0.716446	0.798097	0.859538	0.915977

## Sheet: DLDD n=2
x correct	19	17.2667	15.5333	13.8	12.0666	10.3333	8.59996	6.86662
time	100	169.381	286.901	485.956	823.119	1394.21	2361.53	4000
0	0.00448014	0.00426516	0.00512507	0.00601938	0.00632035	0.00696529	0.00797568	0.00931284
0.1	0.00414048	0.00464782	0.00537875	0.00619996	0.00661702	0.0078295	0.00937304	0.0113336
0.2	0.00440275	0.00546904	0.00602798	0.00677181	0.00767471	0.00992768	0.0118797	0.0147045
0.3	0.00439415	0.0058818	0.00744684	0.00763172	0.00955792	0.011927	0.0143906	0.0188063
0.4	0.00501329	0.00666002	0.00871521	0.00902047	0.0117249	0.0152591	0.0182688	0.0233466
0.5	0.00571411	0.00710717	0.00936874	0.0114454	0.01464	0.0188106	0.0219449	0.0285233
0.6	0.00607098	0.00772631	0.0107231	0.0131051	0.0174347	0.022233	0.0275	0.0360604
0.7	0.0068707	0.00905917	0.0133888	0.0155386	0.0206594	0.0270141	0.0331883	0.0429053
0.8	0.00730925	0.0104866	0.0146529	0.0170349	0.0241463	0.0324316	0.039543	0.0502403
0.9	0.00763172	0.0116733	0.0174261	0.0213344	0.0281449	0.0386831	0.0474929	0.0603443
1	0.00853032	0.0127568	0.0190513	0.0242194	0.0324961	0.0437781	0.0561608	0.0690294
1.1	0.00932144	0.0144379	0.021644	0.0272936	0.0375953	0.0502532	0.063986	0.0794644
1.2	0.0106758	0.0149367	0.0251911	0.0315029	0.0438512	0.0557997	0.0698291	0.0899425
1.3	0.0116303	0.0174863	0.0273796	0.0361507	0.0485162	0.0635432	0.0785787	0.101276
1.4	0.0122408	0.018974	0.0303807	0.0395086	0.0533446	0.0700269	0.0888977	0.11282
1.5	0.0126579	0.0217988	0.0345212	0.0429784	0.0603185	0.0784498	0.0970238	0.122275
1.6	0.0148937	0.0236175	0.037591	0.047695	0.0669355	0.0876379	0.10883	0.136872
1.7	0.0153021	0.025419	0.0417401	0.0517452	0.0726281	0.0957383	0.115998	0.148773
1.8	0.0170306	0.0266186	0.0461472	0.0575324	0.0786389	0.10325	0.126166	0.160434
1.9	0.0175637	0.0294004	0.0494793	0.0612171	0.0853419	0.112227	0.139379	0.171965
2	0.0197866	0.0315158	0.0535381	0.067804	0.0923674	0.120332	0.149349	0.185969
2.1	0.019692	0.0350672	0.0575195	0.0737804	0.098189	0.129864	0.16021	0.198923
2.2	0.0222158	0.0366881	0.0619652	0.0787593	0.105081	0.138141	0.173943	0.211521
2.3	0.0241291	0.0400289	0.0662132	0.0829815	0.115198	0.148313	0.181635	0.22816
2.4	0.0246193	0.0415165	0.070818	0.0883	0.121665	0.157837	0.192741	0.238699
2.5	0.0256082	0.044466	0.0745329	0.0941904	0.128707	0.165726	0.205536	0.258167
2.6	0.0280331	0.0464524	0.0785744	0.101663	0.137401	0.173719	0.215954	0.268727
2.7	0.0294735	0.050537	0.085329	0.104075	0.144629	0.184236	0.22878	0.281243
2.8	0.0304538	0.052618	0.0877454	0.111629	0.150265	0.191717	0.239245	0.296111
2.9	0.0324961	0.0550129	0.0933477	0.11792	0.161324	0.202698	0.250845	0.309706
3	0.0331797	0.059192	0.0997197	0.12378	0.169424	0.211035	0.261723	0.324531
3.1	0.0362238	0.0620684	0.10193	0.128303	0.172563	0.222326	0.271603	0.335314
3.2	0.0381457	0.064373	0.106934	0.13652	0.18136	0.232137	0.284356	0.349644
3.3	0.0398225	0.0683587	0.114222	0.140634	0.190651	0.241459	0.29651	0.363872
3.4	0.0406308	0.071708	0.119575	0.14772	0.1983	0.251829	0.307965	0.375506
3.5	0.0435545	0.0738363	0.121471	0.154814	0.207798	0.260115	0.318236	0.390026
3.6	0.0455237	0.0766482	0.127168	0.160068	0.215266	0.268581	0.328727	0.40117
3.7	0.0464782	0.0820528	0.133114	0.165228	0.222107	0.278457	0.337881	0.417169
3.8	0.0490666	0.0838242	0.136627	0.173771	0.229661	0.290276	0.348307	0.424809
3.9	0.0499609	0.0859267	0.145574	0.175985	0.237374	0.297766	0.363897	0.438336
4	0.0532715	0.0891084	0.147234	0.185565	0.244894	0.302504	0.373743	0.452206
4.1	0.0557782	0.0942334	0.154113	0.191459	0.252698	0.315291	0.381345	0.460517
4.2	0.058603	0.0971184	0.158387	0.196154	0.261843	0.325408	0.393371	0.474667
4.3	0.0575625	0.0991263	0.166144	0.202363	0.270391	0.331603	0.404034	0.48751
4.4	0.0604518	0.102527	0.168328	0.209419	0.274557	0.342404	0.413544	0.498108
4.5	0.0632981	0.107042	0.175048	0.219957	0.287383	0.351614	0.426503	0.51151
4.6	0.0643773	0.110615	0.177972	0.224196	0.291106	0.364293	0.437304	0.52317
4.7	0.0659552	0.115374	0.185586	0.228904	0.296902	0.367316	0.445262	0.532466
4.8	0.0707879	0.11672	0.191378	0.234666	0.310303	0.379724	0.454296	0.543821
4.9	0.0715662	0.120465	0.193687	0.242835	0.313163	0.389071	0.463424	0.561832
5	0.0739438	0.124962	0.201224	0.244473	0.322605	0.392356	0.469404	0.560783
5.1	0.0765493	0.128071	0.207858	0.252337	0.330778	0.404851	0.483614	0.575414
5.2	0.07765	0.13219	0.2134	0.257698	0.33402	0.414323	0.49248	0.587513
5.3	0.0811026	0.134366	0.216031	0.268998	0.343272	0.423386	0.500692	0.596594
5.4	0.0811284	0.138171	0.218542	0.274011	0.350676	0.429874	0.509687	0.604677
5.5	0.0851657	0.142474	0.225955	0.279734	0.358059	0.438791	0.514468	0.617245
5.6	0.0852173	0.144968	0.229983	0.285246	0.368511	0.445787	0.523067	0.624128
5.7	0.0893878	0.149797	0.235947	0.293006	0.376779	0.454687	0.538386	0.631296
5.8	0.0890869	0.151908	0.241025	0.295737	0.379432	0.463123	0.542514	0.643979
5.9	0.0932101	0.153984	0.24547	0.302564	0.389557	0.467723	0.552562	0.65441
6	0.0951449	0.159217	0.253713	0.312397	0.395555	0.477174	0.563599	0.65754
6.1	0.095562	0.163228	0.261577	0.314711	0.402572	0.487076	0.572349	0.666384
6.2	0.0996294	0.164768	0.264677	0.320657	0.407534	0.494901	0.580849	0.676832
6.3	0.10128	0.170052	0.268869	0.326719	0.418485	0.499914	0.582586	0.687594
6.4	0.103843	0.171836	0.27598	0.333611	0.424078	0.50973	0.58974	0.69422
6.5	0.107433	0.175495	0.274419	0.339209	0.433847	0.516196	0.598705	0.704044
6.6	0.110456	0.178797	0.284115	0.346553	0.436956	0.525514	0.615774	0.715111
6.7	0.109699	0.181394	0.290809	0.346231	0.440645	0.531249	0.617713	0.72064
6.8	0.111892	0.186515	0.294537	0.357315	0.44957	0.536688	0.623896	0.724725
6.9	0.116497	0.192293	0.297405	0.361086	0.457989	0.540996	0.627284	0.733526
7	0.11792	0.193665	0.300746	0.366649	0.460397	0.55451	0.63538	0.73854
7.1	0.119433	0.196507	0.307044	0.369775	0.470152	0.556926	0.637973	0.748927
7.2	0.122112	0.200966	0.312793	0.379995	0.473394	0.564244	0.654294	0.754585
7.3	0.124992	0.206314	0.31665	0.386311	0.479663	0.568741	0.653752	0.760665
7.4	0.127	0.206598	0.322725	0.390374	0.488297	0.574842	0.667008	0.763451
7.5	0.128858	0.21113	0.327192	0.397563	0.491968	0.581133	0.666948	0.769475
7.6	0.130943	0.213009	0.33215	0.399399	0.496513	0.585871	0.677103	0.780516
7.7	0.132577	0.218955	0.336213	0.403939	0.50341	0.593997	0.682555	0.781969
7.8	0.134138	0.220107	0.340736	0.410479	0.515233	0.596994	0.687766	0.788032
7.9	0.139022	0.22374	0.344223	0.414821	0.517856	0.604458	0.695058	0.797942
8	0.140449	0.224768	0.352293	0.420265	0.525243	0.609329	0.697195	0.801395
8.1	0.139779	0.229197	0.352822	0.425162	0.525716	0.613758	0.702909	0.806365
8.2	0.142896	0.231647	0.360522	0.435674	0.534177	0.614768	0.71061	0.810372
8.3	0.146249	0.237271	0.361739	0.435537	0.537496	0.626291	0.717442	0.816095
8.4	0.145953	0.239855	0.366284	0.441044	0.542776	0.63047	0.721053	0.822708
8.5	0.149616	0.242396	0.373219	0.451299	0.55092	0.634632	0.729915	0.830172
8.6	0.151319	0.248854	0.373748	0.453702	0.552063	0.645054	0.734747	0.830447
8.7	0.152097	0.252272	0.382317	0.45685	0.562296	0.642539	0.73553	0.835942
8.8	0.15714	0.250333	0.390172	0.462091	0.565732	0.64827	0.740268	0.840022
8.9	0.157334	0.258257	0.391686	0.465668	0.568737	0.65647	0.748742	0.846699
9	0.159625	0.258541	0.393057	0.470673	0.579219	0.660339	0.749929	0.853144
9.1	0.162605	0.26045	0.399708	0.476443	0.581941	0.666535	0.752161	0.859065
9.2	0.165275	0.2665	0.401222	0.481817	0.585909	0.674687	0.761362	0.859714
9.3	0.167773	0.267415	0.404296	0.489114	0.585394	0.672971	0.766663	0.873726
9.4	0.169441	0.269819	0.412358	0.49245	0.592969	0.67875	0.770412	0.865785
9.5	0.16908	0.275597	0.418566	0.49788	0.596701	0.684653	0.772837	0.876409
9.6	0.172997	0.276715	0.420948	0.499015	0.604961	0.69038	0.77948	0.876534
9.7	0.174076	0.281445	0.424422	0.504717	0.606513	0.692835	0.775911	0.880735
9.8	0.177279	0.286983	0.426753	0.508681	0.608762	0.697474	0.787795	0.882794
9.9	0.177572	0.285194	0.430528	0.513806	0.614755	0.699783	0.79102	0.88598
10	0.181953	0.290293	0.438938	0.519541	0.617546	0.703133	0.78657	0.890335
10.1	0.184485	0.293505	0.440494	0.52695	0.621613	0.704079	0.795014	0.890834
10.2	0.18774	0.294945	0.444338	0.527719	0.623341	0.706628	0.797581	0.897008
10.3	0.183118	0.299813	0.448414	0.530179	0.633914	0.71779	0.80124	0.908755
10.4	0.188523	0.304787	0.449816	0.532801	0.632478	0.718555	0.81223	0.901811
10.5	0.190952	0.306094	0.457361	0.537342	0.64293	0.725211	0.800445	0.905865
10.6	0.194091	0.310467	0.459017	0.542725	0.64256	0.729846	0.81416	0.911825
10.7	0.194409	0.312238	0.46237	0.544741	0.65005	0.729768	0.817871	0.911249
10.8	0.196486	0.315252	0.466764	0.55052	0.648481	0.731544	0.818946	0.911816
10.9	0.198382	0.317024	0.470484	0.551823	0.657768	0.741455	0.824191	0.922526
11	0.203799	0.318516	0.474667	0.558186	0.659277	0.742744	0.825193	0.921438
11.1	0.199697	0.323499	0.476039	0.562885	0.65693	0.744954	0.827536	0.927423
11.2	0.205846	0.32662	0.479917	0.562735	0.662601	0.747577	0.829338	0.920966
11.3	0.208782	0.328396	0.485743	0.570087	0.670589	0.751954	0.834527	0.929053
11.4	0.208774	0.331264	0.490932	0.575337	0.67316	0.75143	0.837386	0.930403
11.5	0.211233	0.335538	0.492519	0.571558	0.678711	0.754779	0.836294	0.937467
11.6	0.214965	0.335387	0.495838	0.580294	0.676011	0.763112	0.850577	0.935593
11.7	0.213641	0.342443	0.500791	0.584074	0.678294	0.760592	0.842808	0.93444
11.8	0.2161	0.339196	0.50187	0.589138	0.682744	0.766646	0.845771	0.941947
11.9	0.215361	0.345293	0.502937	0.592888	0.689417	0.769346	0.845543	0.943259
12	0.218805	0.351102	0.509042	0.593042	0.688372	0.771427	0.847606	0.947739
12.1	0.224424	0.346291	0.51412	0.598847	0.687138	0.777395	0.848931	0.949214
12.2	0.226711	0.354232	0.515865	0.604617	0.695935	0.774394	0.856734	0.951226
12.3	0.224962	0.355634	0.519851	0.61049	0.69956	0.774265	0.854305	0.943998
12.4	0.226625	0.356034	0.523622	0.60856	0.702686	0.779673	0.853501	0.953629
12.5	0.225637	0.361034	0.527642	0.61172	0.701194	0.783801	0.857345	0.956716
12.6	0.231824	0.365144	0.532831	0.615125	0.707583	0.778809	0.861447	0.958673
12.7	0.233543	0.364401	0.528665	0.616647	0.711818	0.78562	0.868519	0.953973
12.8	0.237727	0.370317	0.536219	0.619657	0.708576	0.785525	0.87134	0.958832
12.9	0.237013	0.368773	0.54091	0.620581	0.714122	0.79142	0.871753	0.960031
13	0.237701	0.372024	0.542875	0.62614	0.718228	0.793449	0.868614	0.967319
13.1	0.239907	0.376839	0.546603	0.628673	0.720215	0.794236	0.875618	0.963131
13.2	0.241154	0.376508	0.545846	0.634495	0.719553	0.796592	0.878172	0.963905
13.3	0.24504	0.383194	0.549522	0.635569	0.720236	0.797474	0.875717	0.967388
13.4	0.248158	0.386517	0.555696	0.637508	0.722347	0.804809	0.882007	0.96243
13.5	0.247715	0.382325	0.553968	0.63673	0.729717	0.800634	0.876573	0.968858
13.6	0.249602	0.388383	0.561608	0.648262	0.727627	0.803777	0.876904	0.9752
13.7	0.25063	0.392541	0.557158	0.642737	0.735612	0.809164	0.883964	0.968777
13.8	0.251013	0.393332	0.558285	0.650201	0.732361	0.810377	0.885159	0.973042
13.9	0.254125	0.396652	0.565977	0.651142	0.740066	0.813988	0.886272	0.975209
14	0.256537	0.394996	0.566609	0.653989	0.736024	0.812449	0.884819	0.973291
14.1	0.258773	0.398036	0.570392	0.655068	0.744202	0.807371	0.89307	0.979607
14.2	0.260411	0.400422	0.573058	0.658181	0.744254	0.815519	0.892356	0.973695
14.3	0.264032	0.406321	0.579022	0.664321	0.745832	0.822484	0.89126	0.972702
14.4	0.26251	0.409198	0.582711	0.664389	0.751167	0.824148	0.899201	0.975656
14.5	0.264681	0.408759	0.582607	0.66334	0.746485	0.822596	0.891922	0.979375
14.6	0.264582	0.413992	0.585909	0.668035	0.74578	0.822415	0.894618	0.983778
14.7	0.266164	0.414632	0.587045	0.669454	0.749108	0.823421	0.89451	0.982793
14.8	0.268864	0.415548	0.586546	0.674235	0.759177	0.824849	0.900899	0.980037
14.9	0.271487	0.41652	0.590291	0.674472	0.759771	0.827618	0.893861	0.986074
15	0.274007	0.421451	0.593438	0.681618	0.760945	0.82248	0.904485	0.983
15.1	0.270163	0.4187	0.595179	0.684881	0.762888	0.823353	0.89921	0.988649
15.2	0.273564	0.423261	0.59766	0.681936	0.757509	0.830649	0.898204	0.985102
15.3	0.276092	0.427148	0.59834	0.685363	0.763584	0.829166	0.898646	0.986938
15.4	0.280254	0.429388	0.603869	0.683097	0.769471	0.828809	0.902017	0.983313
15.5	0.281784	0.428791	0.606212	0.686089	0.765635	0.834377	0.901222	0.987359
15.6	0.279226	0.430713	0.608779	0.6898	0.768168	0.833762	0.904636	0.988438
15.7	0.283702	0.435223	0.613672	0.692422	0.768671	0.836815	0.909258	0.992772
15.8	0.286621	0.437007	0.613784	0.695376	0.765416	0.829811	0.902912	0.987656
15.9	0.282937	0.441401	0.617447	0.698386	0.769776	0.83979	0.906446	0.991749
16	0.2866	0.44092	0.616969	0.69256	0.769096	0.834338	0.907271	0.983804
16.1	0.290487	0.442476	0.617963	0.697608	0.771126	0.837821	0.91001	0.98923
16.2	0.290263	0.446883	0.622383	0.700639	0.780043	0.844408	0.907207	0.98932
16.3	0.288741	0.446526	0.621222	0.700828	0.781913	0.840224	0.911184	0.988249
16.4	0.295874	0.451062	0.623109	0.702982	0.774058	0.840925	0.913695	0.990584
16.5	0.293101	0.449742	0.622946	0.704848	0.782911	0.848647	0.910363	0.991311
16.6	0.297895	0.449656	0.627865	0.709543	0.782812	0.848144	0.909374	0.992351
16.7	0.296528	0.455151	0.632014	0.70711	0.781939	0.842434	0.907667	0.993336
16.8	0.301558	0.455328	0.632684	0.708653	0.783354	0.846536	0.91612	0.994776
16.9	0.299322	0.46191	0.631197	0.71033	0.784463	0.846854	0.916507	0.9957
17	0.303588	0.458836	0.636704	0.713718	0.784626	0.845392	0.911171	0.991693
17.1	0.304981	0.458815	0.636661	0.710412	0.783371	0.848389	0.913325	0.989582
17.2	0.305987	0.462048	0.642212	0.71837	0.782623	0.84292	0.908897	0.993275
17.3	0.309044	0.467315	0.636382	0.720976	0.784682	0.84565	0.917044	0.994488
17.4	0.304379	0.469185	0.641451	0.720481	0.784712	0.851519	0.914374	0.995146
17.5	0.31017	0.465664	0.642092	0.720993	0.789077	0.841793	0.910913	0.994905
17.6	0.309723	0.469396	0.643382	0.719965	0.788144	0.851498	0.919121	0.995976
17.7	0.312746	0.473033	0.642217	0.723302	0.792306	0.851381	0.91127	0.994217
17.8	0.31352	0.470742	0.647475	0.719329	0.798385	0.847379	0.916825	0.994019
17.9	0.315072	0.477015	0.649074	0.726716	0.787069	0.852362	0.919499	0.993981
18	0.313799	0.48327	0.647238	0.72666	0.792753	0.850341	0.917036	0.993589
18.1	0.320438	0.485227	0.652617	0.731591	0.78976	0.854727	0.916378	0.995817
18.2	0.319066	0.479805	0.655094	0.728767	0.791519	0.84863	0.916348	1
18.3	0.318722	0.48487	0.654178	0.729691	0.795436	0.847443	0.920832	0.998809
18.4	0.32085	0.485076	0.658559	0.735925	0.793922	0.854305	0.921284	0.992282
18.5	0.320463	0.487841	0.657372	0.731978	0.796528	0.852035	0.920282	0.990967
18.6	0.325232	0.485171	0.662932	0.734739	0.797684	0.856872	0.910475	0.989414
18.7	0.325425	0.493366	0.664011	0.732585	0.79605	0.846798	0.918377	0.993533
18.8	0.326543	0.489354	0.663418	0.736931	0.795087	0.853557	0.917036	0.998276
18.9	0.329497	0.491457	0.66509	0.737327	0.801395	0.856528	0.918235	0.991392
19	0.329522	0.488052	0.669188	0.741549	0.801171	0.856085	0.921172	0.992278
19.1	0.327536	0.494776	0.667795	0.73774	0.800217	0.852319	0.921185	0.992373
19.2	0.33215	0.496724	0.672021	0.741953	0.803811	0.852744	0.916141	0.995761
19.3	0.33218	0.496363	0.665464	0.736845	0.799503	0.857074	0.920462	0.992265
19.4	0.329686	0.499983	0.673062	0.743699	0.799662	0.861395	0.924409	0.992545
19.5	0.334832	0.501544	0.671595	0.748067	0.8036	0.858188	0.916933	0.991427
19.6	0.33819	0.502606	0.678535	0.7448	0.802775	0.855715	0.916898	0.995404
19.7	0.33847	0.501879	0.668715	0.745139	0.802358	0.854047	0.916984	0.989298
19.8	0.340581	0.50267	0.673083	0.749594	0.80225	0.85523	0.918192	0.990347
19.9	0.337498	0.502472	0.677421	0.749349	0.799537	0.85348	0.917268	0.987213
20	0.340628	0.507941	0.679206	0.747431	0.800629	0.852753	0.920738	0.992347
20.1	0.34203	0.508797	0.677125	0.749448	0.805299	0.85661	0.917126	0.98318
20.2	0.345345	0.508328	0.683707	0.749392	0.804581	0.858287	0.916163	0.99021
20.3	0.343208	0.508161	0.680981	0.751688	0.802328	0.858648	0.919327	0.993306
20.4	0.346097	0.509038	0.679971	0.751739	0.810011	0.85839	0.912715	0.985467
20.5	0.346992	0.514425	0.684468	0.753661	0.804899	0.859697	0.917242	0.991667
20.6	0.348518	0.515018	0.683879	0.750875	0.80686	0.858613	0.911541	0.993693
20.7	0.347078	0.516807	0.686941	0.751597	0.811963	0.852783	0.917062	0.986233
20.8	0.348105	0.520745	0.686919	0.753063	0.808489	0.856107	0.915737	0.985747
20.9	0.353484	0.521102	0.683608	0.753128	0.806068	0.854262	0.919095	0.980691
21	0.351682	0.519636	0.686764	0.756752	0.811847	0.850835	0.916748	0.988017
21.1	0.350801	0.519735	0.68811	0.757556	0.808179	0.859314	0.916043	0.983331
21.2	0.351442	0.521524	0.687211	0.755325	0.804976	0.857796	0.915024	0.987024
21.3	0.355483	0.524391	0.68974	0.756718	0.808562	0.857732	0.913626	0.985296
21.4	0.35308	0.525286	0.688604	0.758907	0.803777	0.857792	0.916382	0.986147
21.5	0.356098	0.525127	0.689284	0.75425	0.807216	0.86391	0.908703	0.984633
21.6	0.359005	0.527371	0.69526	0.76171	0.806864	0.854004	0.919499	0.981413
21.7	0.357212	0.530617	0.69977	0.757251	0.805196	0.855311	0.912203	0.980394
21.8	0.357723	0.526674	0.694534	0.757483	0.81106	0.85728	0.916748	0.981245
21.9	0.356352	0.530523	0.69839	0.7583	0.807281	0.851558	0.911657	0.9806
22	0.364886	0.534848	0.69443	0.759891	0.806073	0.851648	0.916748	0.981336
22.1	0.365256	0.531645	0.699491	0.762372	0.81143	0.855449	0.909567	0.976266
22.2	0.364534	0.532806	0.701194	0.762346	0.803261	0.849984	0.911115	0.980656
22.3	0.369152	0.537647	0.698175	0.762282	0.804779	0.857237	0.908789	0.977139
22.4	0.366193	0.537312	0.702802	0.762922	0.807535	0.853751	0.91489	0.975716
22.5	0.366202	0.537084	0.699345	0.762428	0.805196	0.85412	0.910006	0.979672
22.6	0.364985	0.536048	0.699547	0.764797	0.808386	0.85747	0.909688	0.973945
22.7	0.369207	0.538408	0.702041	0.762123	0.810273	0.854451	0.909787	0.972178
22.8	0.36907	0.537995	0.703833	0.760497	0.805681	0.85357	0.915174	0.975772
22.9	0.368072	0.541117	0.702346	0.76478	0.810953	0.853097	0.912285	0.980742
23	0.369612	0.54266	0.704504	0.762247	0.809899	0.853501	0.909434	0.973025
23.1	0.372707	0.541508	0.705515	0.766874	0.809487	0.855281	0.906166	0.971386
23.2	0.370867	0.543499	0.704973	0.764152	0.810768	0.854916	0.906824	0.971085
23.3	0.370992	0.54668	0.704745	0.761675	0.8071	0.85262	0.904898	0.969052
23.4	0.375889	0.542634	0.702905	0.763898	0.80842	0.849829	0.907022	0.973068
23.5	0.375167	0.544913	0.702096	0.763103	0.810652	0.856201	0.910982	0.972337
23.6	0.375167	0.548336	0.704298	0.767084	0.804409	0.854193	0.909739	0.972182
23.7	0.378464	0.548882	0.709741	0.766951	0.807698	0.856558	0.906454	0.968691
23.8	0.378843	0.549325	0.70659	0.771599	0.807793	0.851278	0.903281	0.967022
23.9	0.380115	0.553327	0.709251	0.763309	0.812599	0.852886	0.902942	0.971197
24	0.380575	0.549067	0.707849	0.765231	0.806812	0.853415	0.910728	0.971576
24.1	0.377523	0.549772	0.71067	0.76634	0.807853	0.846673	0.899003	0.970152
24.2	0.384277	0.5507	0.711349	0.765515	0.805518	0.853501	0.901519	0.969202
24.3	0.380072	0.552119	0.711169	0.76696	0.808235	0.855599	0.907891	0.963144
24.4	0.381736	0.550227	0.708959	0.767777	0.808506	0.846944	0.905818	0.964215
24.5	0.383688	0.555537	0.71334	0.767114	0.805041	0.846338	0.89718	0.962714
24.6	0.381405	0.555129	0.711736	0.767441	0.808076	0.850259	0.897511	0.965049
24.7	0.386272	0.554884	0.707256	0.770111	0.813713	0.847701	0.897008	0.963609
24.8	0.389467	0.55583	0.714698	0.763597	0.801739	0.846579	0.896424	0.963824
24.9	0.388878	0.551934	0.713086	0.769686	0.804379	0.847396	0.902877	0.958587
25	0.386986	0.559239	0.707862	0.767304	0.807999	0.843406	0.89439	0.956196
25.1	0.387691	0.557605	0.712751	0.767381	0.807909	0.847232	0.89663	0.954562
25.2	0.391354	0.560426	0.710764	0.770877	0.804396	0.847869	0.901828	0.953586
25.3	0.390073	0.562236	0.714501	0.775378	0.806077	0.841097	0.900753	0.956592
25.4	0.390976	0.56424	0.714277	0.773383	0.806915	0.848557	0.900336	0.955586
25.5	0.389261	0.56086	0.714479	0.770864	0.803897	0.848789	0.900448	0.959511
25.6	0.391651	0.56577	0.716543	0.768344	0.805286	0.847456	0.895718	0.958892
25.7	0.390159	0.560215	0.718667	0.76723	0.808541	0.846213	0.892133	0.959468
25.8	0.394889	0.564489	0.712218	0.772528	0.808799	0.84593	0.894824	0.956003
25.9	0.394614	0.562116	0.714514	0.770511	0.805402	0.84605	0.890396	0.958084
26	0.394687	0.563032	0.716521	0.770644	0.808799	0.847645	0.89172	0.949923
26.1	0.393543	0.563698	0.716195	0.766319	0.808661	0.842959	0.890804	0.949364
26.2	0.39528	0.564373	0.721797	0.770485	0.803334	0.84301	0.890163	0.947464
26.3	0.396664	0.569907	0.715644	0.764169	0.807315	0.836664	0.893259	0.945026
26.4	0.39737	0.563483	0.719097	0.771225	0.806649	0.84203	0.892292	0.944742
26.5	0.39973	0.56605	0.714823	0.772803	0.804667	0.844485	0.889686	0.948775
26.6	0.402228	0.566011	0.716582	0.770404	0.805703	0.840555	0.885271	0.944041
26.7	0.403256	0.567305	0.71843	0.771177	0.803747	0.845164	0.885778	0.947584
26.8	0.400603	0.568556	0.719114	0.766134	0.805282	0.845736	0.885735	0.948367
26.9	0.40053	0.571566	0.715872	0.772798	0.805273	0.837885	0.882962	0.946754
27	0.400818	0.566785	0.71693	0.770326	0.799211	0.83494	0.885812	0.951565
27.1	0.39976	0.568509	0.719871	0.765941	0.804822	0.835727	0.881126	0.940279
27.2	0.409451	0.574563	0.717295	0.768022	0.805436	0.834192	0.879217	0.938684
27.3	0.402628	0.569137	0.721677	0.773366	0.804155	0.840207	0.879832	0.940718
27.4	0.407405	0.571721	0.722433	0.77049	0.805462	0.834888	0.881973	0.940107
27.5	0.407516	0.566776	0.721333	0.770937	0.79958	0.835473	0.882257	0.941676
27.6	0.409103	0.568109	0.719303	0.764264	0.802384	0.831393	0.88509	0.944592
27.7	0.407087	0.570732	0.721376	0.772953	0.804594	0.838491	0.880825	0.93714
27.8	0.408484	0.574769	0.715511	0.769385	0.79605	0.832433	0.876654	0.935137
27.9	0.408114	0.570259	0.714299	0.772467	0.797714	0.838388	0.881225	0.940185
28	0.407413	0.573591	0.716435	0.771896	0.800625	0.833779	0.879268	0.940034
28.1	0.412693	0.572319	0.720546	0.769819	0.800242	0.830692	0.871723	0.934015
28.2	0.410625	0.577405	0.717467	0.762187	0.797878	0.83264	0.873185	0.931899
28.3	0.410978	0.57501	0.721423	0.766491	0.795418	0.836084	0.879711	0.936547
28.4	0.410273	0.579052	0.722635	0.771156	0.801558	0.832549	0.875906	0.934015
28.5	0.407581	0.576971	0.718482	0.770846	0.796584	0.825382	0.877321	0.930235
28.6	0.408918	0.571484	0.721771	0.766194	0.796558	0.836135	0.875756	0.931143
28.7	0.414796	0.580634	0.718379	0.768611	0.798153	0.829866	0.872643	0.928653
28.8	0.415806	0.576971	0.720692	0.769428	0.79157	0.827532	0.876693	0.927393
28.9	0.41449	0.578015	0.718087	0.770795	0.78648	0.82776	0.869328	0.923158
29	0.410728	0.57897	0.719742	0.771104	0.797181	0.827893	0.876865	0.928859
29.1	0.415062	0.579043	0.723237	0.768327	0.794967	0.829527	0.873649	0.927333
29.2	0.417216	0.578746	0.72012	0.764909	0.795934	0.823077	0.869083	0.925398
29.3	0.415793	0.580591	0.719106	0.768654	0.796575	0.82951	0.867832	0.925282
29.4	0.416644	0.574537	0.718392	0.762273	0.792052	0.828731	0.867182	0.92097
29.5	0.41796	0.576382	0.716951	0.764156	0.79194	0.831255	0.866959	0.923666
29.6	0.420333	0.579813	0.718151	0.770614	0.795302	0.823817	0.868012	0.920742
29.7	0.416184	0.579727	0.718779	0.76631	0.789571	0.82285	0.865149	0.922217
29.8	0.415466	0.577551	0.719535	0.769299	0.79455	0.828069	0.864009	0.918734
29.9	0.419697	0.583798	0.71779	0.763632	0.789528	0.824943	0.862934	0.91956

## Sheet: DLDD n=3
x correct	18.1333	16.4	14.6667	12.9333	11.2	9.46663	7.73329	5.99995
time	100	169.381	286.901	485.956	823.119	1394.21	2361.53	4000
0	0.00326456	0.00433988	0.00457913	0.00544608	0.00556184	0.00705135	0.00675808	0.00905536
0.1	0.00373019	0.00472319	0.00497016	0.00618955	0.00679409	0.00802377	0.00840708	0.0117745
0.2	0.00388454	0.00495215	0.00549753	0.00706678	0.00808294	0.00968049	0.0108407	0.0147175
0.3	0.00409807	0.00544608	0.00597602	0.00786942	0.00918142	0.0113578	0.0123328	0.0175139
0.4	0.00437076	0.00597345	0.00732404	0.00884441	0.0109899	0.0135547	0.0150623	0.0214267
0.5	0.00433988	0.00626672	0.00756586	0.0111674	0.0128267	0.0168579	0.0181853	0.0260393
0.6	0.00514766	0.00680696	0.00837621	0.0125	0.0151471	0.0200787	0.0215605	0.0323035
0.7	0.00493929	0.00743208	0.009858	0.0138532	0.0171615	0.0231246	0.0258129	0.0389561
0.8	0.00556956	0.00790543	0.0106452	0.016045	0.0209097	0.0271095	0.0311947	0.0451122
0.9	0.0059966	0.00922	0.0124588	0.0188053	0.0242488	0.0323729	0.0364247	0.0531925
1	0.00653427	0.0099326	0.0134416	0.0210589	0.0273436	0.0369598	0.041737	0.0619855
1.1	0.00729059	0.0113707	0.0153375	0.0237832	0.0315137	0.0430541	0.0488166	0.0711952
1.2	0.0076739	0.0124743	0.017092	0.0269448	0.0356915	0.0477259	0.0550834	0.0805516
1.3	0.00870549	0.013758	0.0183603	0.029592	0.0409112	0.0533906	0.0614144	0.0893008
1.4	0.00913254	0.0145812	0.0201225	0.0333736	0.0450247	0.059647	0.0697829	0.100679
1.5	0.0095107	0.0153401	0.0218178	0.0356478	0.0504373	0.0667421	0.0765873	0.114157
1.6	0.010743	0.0178766	0.0240019	0.0395915	0.0557934	0.0737806	0.0870241	0.123688
1.7	0.0110362	0.018458	0.0259313	0.044415	0.0614195	0.080621	0.0952948	0.135746
1.8	0.0117154	0.0196414	0.0279173	0.0479497	0.0665106	0.0874743	0.103411	0.148956
1.9	0.0130274	0.0216145	0.0307676	0.0531771	0.0726641	0.0964396	0.11321	0.162166
2	0.013794	0.0224172	0.0329492	0.054965	0.0776369	0.103437	0.123099	0.17401
2.1	0.0148796	0.0251055	0.0365533	0.0599841	0.0843615	0.111998	0.132152	0.190152
2.2	0.0152835	0.0258901	0.0385007	0.0650391	0.0925911	0.12136	0.14053	0.19975
2.3	0.0159549	0.0281334	0.0405819	0.0680361	0.0976024	0.129139	0.152529	0.213547
2.4	0.0177969	0.0304126	0.0431339	0.0737652	0.105374	0.137274	0.160571	0.228051
2.5	0.0181056	0.0318121	0.0465322	0.0777681	0.109678	0.145786	0.171861	0.242419
2.6	0.0189802	0.0327254	0.0502804	0.0833762	0.117043	0.155088	0.181804	0.256817
2.7	0.0200247	0.0362832	0.0518059	0.0876621	0.126243	0.163861	0.19387	0.26943
2.8	0.0215554	0.0365199	0.0550705	0.0932471	0.132849	0.172703	0.205294	0.287166
2.9	0.0225175	0.0391593	0.0589396	0.0989298	0.140348	0.18325	0.21568	0.2985
3	0.023351	0.0413794	0.0622865	0.104453	0.14558	0.192136	0.226266	0.313743
3.1	0.0247582	0.0432033	0.0648282	0.108296	0.155307	0.201142	0.235535	0.326734
3.2	0.0258901	0.0449707	0.0669454	0.112762	0.163035	0.213668	0.251021	0.338683
3.3	0.027624	0.0468924	0.0700427	0.119852	0.169436	0.222271	0.258114	0.356081
3.4	0.0288588	0.0501183	0.0736906	0.125129	0.17935	0.230034	0.27058	0.368381
3.5	0.029381	0.0521764	0.0784035	0.130763	0.186108	0.241006	0.281341	0.38262
3.6	0.03023	0.054556	0.0812924	0.137389	0.192851	0.248685	0.293705	0.397281
3.7	0.0322186	0.0569587	0.0854728	0.142048	0.199928	0.258778	0.300394	0.410074
3.8	0.0330572	0.0594335	0.0891078	0.15063	0.209745	0.269806	0.315736	0.42723
3.9	0.0351281	0.0614195	0.0931673	0.155341	0.219394	0.279525	0.323768	0.440474
4	0.0356272	0.0635676	0.0963933	0.160375	0.226333	0.287786	0.337657	0.449143
4.1	0.0373379	0.0663562	0.0999383	0.16739	0.233186	0.298598	0.346393	0.463851
4.2	0.0385187	0.067339	0.103851	0.171422	0.242138	0.305737	0.356056	0.478975
4.3	0.039396	0.0712441	0.106974	0.178208	0.251209	0.314743	0.367028	0.48778
4.4	0.0417113	0.0740507	0.112137	0.184999	0.257545	0.325432	0.379494	0.500373
4.5	0.0432651	0.0760264	0.113665	0.189018	0.266554	0.335061	0.388107	0.515703
4.6	0.0443018	0.0768857	0.120267	0.197924	0.274632	0.34514	0.400911	0.527398
4.7	0.0452485	0.0822391	0.121463	0.203298	0.28299	0.354829	0.411983	0.538856
4.8	0.0465348	0.0835666	0.128012	0.210321	0.29184	0.363027	0.423459	0.550018
4.9	0.0488475	0.08688	0.129829	0.216696	0.296427	0.370861	0.432435	0.563732
5	0.0502573	0.089769	0.135571	0.221288	0.306938	0.381385	0.442884	0.572608
5.1	0.0513017	0.0921486	0.139411	0.22784	0.315736	0.390757	0.452413	0.586139
5.2	0.055212	0.0931262	0.144425	0.232237	0.321499	0.400358	0.465538	0.597945
5.3	0.0542113	0.0959225	0.147631	0.239329	0.330999	0.409346	0.473382	0.608309
5.4	0.0563259	0.0993208	0.151026	0.246025	0.339921	0.418445	0.477449	0.616176
5.5	0.0583814	0.103524	0.155665	0.250592	0.344441	0.423446	0.488707	0.625406
5.6	0.0590759	0.106948	0.159578	0.257661	0.350939	0.435702	0.501255	0.636775
5.7	0.0621398	0.109032	0.16205	0.263318	0.362343	0.445012	0.509243	0.647201
5.8	0.0636113	0.110856	0.167545	0.272777	0.36987	0.45115	0.515335	0.658235
5.9	0.0649851	0.114167	0.17199	0.276654	0.371998	0.462641	0.523529	0.666485
6	0.0657285	0.118036	0.173986	0.283026	0.382476	0.466842	0.536113	0.670856
6.1	0.0681442	0.119117	0.179129	0.289836	0.391114	0.473763	0.540253	0.681004
6.2	0.0687359	0.122075	0.182342	0.295467	0.39777	0.486288	0.554394	0.691349
6.3	0.0713496	0.126279	0.187325	0.300242	0.406035	0.492059	0.560792	0.694256
6.4	0.0721676	0.129829	0.18997	0.307563	0.411574	0.498829	0.57005	0.706133
6.5	0.0754965	0.131627	0.193816	0.313027	0.419366	0.508564	0.57696	0.713143
6.6	0.0754631	0.132159	0.200612	0.322361	0.42783	0.513537	0.582821	0.722049
6.7	0.0785733	0.137032	0.202225	0.324064	0.431676	0.521908	0.59406	0.730423
6.8	0.0805413	0.139332	0.207262	0.335782	0.438087	0.526816	0.599642	0.73822
6.9	0.081331	0.143206	0.210246	0.336854	0.448765	0.53988	0.602771	0.750069
7	0.0832553	0.146332	0.217177	0.343473	0.454723	0.547307	0.615265	0.752259
7.1	0.0843203	0.146946	0.217949	0.349699	0.459621	0.550761	0.621301	0.759048
7.2	0.0868903	0.152233	0.222865	0.354818	0.465749	0.55754	0.627228	0.766354
7.3	0.0893831	0.155492	0.228939	0.359287	0.471566	0.567676	0.63438	0.775679
7.4	0.0901909	0.157255	0.229595	0.366315	0.480667	0.568288	0.644001	0.782836
7.5	0.0916418	0.161525	0.237703	0.371149	0.481208	0.58095	0.650198	0.789972
7.6	0.093476	0.164754	0.241081	0.377421	0.49236	0.585517	0.656784	0.795565
7.7	0.0961232	0.164741	0.244778	0.381964	0.497098	0.593445	0.660766	0.801747
7.8	0.0962827	0.169207	0.247821	0.389036	0.507767	0.600831	0.663496	0.802989
7.9	0.0978674	0.170997	0.25426	0.393895	0.513038	0.602382	0.666593	0.809107
8	0.101042	0.176245	0.255251	0.400767	0.517269	0.607409	0.676999	0.82056
8.1	0.102575	0.178257	0.263112	0.405299	0.523611	0.618144	0.682646	0.824786
8.2	0.103139	0.180107	0.262657	0.408973	0.526526	0.621954	0.691174	0.828813
8.3	0.106061	0.183106	0.268839	0.413794	0.536965	0.621774	0.692236	0.834061
8.4	0.107746	0.186579	0.27251	0.422276	0.543414	0.632193	0.699159	0.840538
8.5	0.110223	0.189967	0.277457	0.427318	0.542131	0.636849	0.708317	0.847173
8.6	0.111538	0.19149	0.281413	0.431408	0.550216	0.641359	0.711504	0.856375
8.7	0.113573	0.1953	0.285946	0.440577	0.552699	0.651541	0.714571	0.857273
8.8	0.115533	0.197901	0.288928	0.444533	0.561342	0.649004	0.721962	0.863879
8.9	0.118118	0.202115	0.292977	0.447965	0.566788	0.654674	0.72667	0.866084
9	0.119659	0.202182	0.297551	0.451227	0.572839	0.665085	0.730575	0.869099
9.1	0.120002	0.209068	0.30106	0.458636	0.576183	0.668882	0.734693	0.874779
9.2	0.122582	0.209719	0.306861	0.467149	0.579788	0.671913	0.742089	0.876515
9.3	0.125687	0.212623	0.308623	0.469047	0.588408	0.677146	0.745393	0.883232
9.4	0.127001	0.215008	0.314702	0.47464	0.588951	0.681604	0.748233	0.889566
9.5	0.127452	0.219508	0.315327	0.481182	0.598626	0.687184	0.751263	0.890327
9.6	0.12918	0.222847	0.321136	0.485043	0.600116	0.685123	0.755752	0.899442
9.7	0.132211	0.225455	0.3266	0.492336	0.608747	0.694248	0.761538	0.898521
9.8	0.132646	0.227228	0.328504	0.496326	0.608742	0.698176	0.766601	0.902341
9.9	0.134565	0.231022	0.335877	0.504404	0.614167	0.703313	0.770768	0.909464
10	0.136967	0.234009	0.338179	0.508168	0.618563	0.706817	0.774115	0.909207
10.1	0.140404	0.233587	0.342177	0.513346	0.619778	0.71089	0.784169	0.913977
10.2	0.140582	0.240111	0.346681	0.517781	0.628589	0.712232	0.783266	0.918458
10.3	0.141824	0.242442	0.348572	0.520753	0.62996	0.717591	0.783981	0.919039
10.4	0.144137	0.245694	0.354204	0.524359	0.637685	0.722487	0.787178	0.923608
10.5	0.144662	0.247728	0.355588	0.5288	0.640636	0.728126	0.791562	0.932723
10.6	0.146854	0.251469	0.359022	0.532484	0.644667	0.725352	0.793407	0.926814
10.7	0.148866	0.253427	0.361757	0.535241	0.647919	0.731678	0.797343	0.930109
10.8	0.152647	0.258358	0.366583	0.542434	0.651271	0.734616	0.799385	0.933603
10.9	0.152892	0.259122	0.372541	0.543106	0.657172	0.742339	0.800797	0.936085
11	0.154476	0.262657	0.37454	0.548462	0.65835	0.743435	0.804589	0.943641
11.1	0.155554	0.263344	0.377261	0.555055	0.660974	0.747173	0.81144	0.944605
11.2	0.159282	0.268283	0.38137	0.558651	0.665633	0.747929	0.809297	0.948642
11.3	0.160429	0.270807	0.38537	0.562834	0.669024	0.751953	0.814162	0.948855
11.4	0.162019	0.274051	0.386319	0.56568	0.67208	0.751515	0.815001	0.948045
11.5	0.164108	0.275584	0.392195	0.569595	0.674421	0.75744	0.814671	0.95176
11.6	0.16694	0.276721	0.398264	0.574179	0.677508	0.759441	0.82313	0.957237
11.7	0.167077	0.279983	0.395995	0.577629	0.67918	0.761085	0.827215	0.95895
11.8	0.169724	0.282733	0.403095	0.580989	0.68776	0.76463	0.829613	0.957285
11.9	0.171561	0.286311	0.404569	0.587652	0.68796	0.767326	0.831272	0.95948
12	0.174979	0.288923	0.407291	0.592005	0.690744	0.772067	0.83166	0.961139
12.1	0.173775	0.291518	0.409639	0.589833	0.694649	0.775643	0.834462	0.962832
12.2	0.176886	0.290996	0.41799	0.600746	0.697463	0.773575	0.83217	0.967617
12.3	0.177632	0.295938	0.419526	0.60134	0.696416	0.777127	0.8375	0.967336
12.4	0.179916	0.301181	0.421859	0.605096	0.702742	0.780873	0.841981	0.968257
12.5	0.182566	0.300551	0.422641	0.604471	0.704458	0.781269	0.843404	0.972541
12.6	0.183564	0.304721	0.42978	0.606184	0.703787	0.781249	0.844256	0.974892
12.7	0.186373	0.306748	0.431439	0.610069	0.713748	0.78625	0.84229	0.972
12.8	0.187914	0.309889	0.435928	0.612436	0.711059	0.789751	0.850087	0.976068
12.9	0.189293	0.315973	0.434886	0.613676	0.716948	0.793983	0.85062	0.98085
13	0.191652	0.313758	0.441531	0.617275	0.717066	0.791598	0.847911	0.980557
13.1	0.192239	0.31577	0.443684	0.621069	0.721316	0.794631	0.852305	0.980685
13.2	0.194479	0.319258	0.444729	0.621908	0.720125	0.793852	0.847844	0.983523
13.3	0.196887	0.322878	0.449738	0.623053	0.723757	0.802287	0.856313	0.985987
13.4	0.19973	0.324594	0.448742	0.623902	0.723752	0.79857	0.856534	0.986996
13.5	0.197952	0.328159	0.454641	0.625628	0.729793	0.803638	0.855423	0.983803
13.6	0.202508	0.32738	0.453311	0.629697	0.726845	0.804739	0.858582	0.985632
13.7	0.202861	0.332656	0.459158	0.630575	0.730119	0.805024	0.855629	0.986492
13.8	0.204723	0.332556	0.461484	0.638015	0.732828	0.803084	0.854556	0.986471
13.9	0.206159	0.337112	0.463318	0.638727	0.738717	0.808528	0.859457	0.990247
14	0.205415	0.335465	0.465716	0.640613	0.735406	0.803645	0.859503	0.992578
14.1	0.210607	0.340073	0.471123	0.642802	0.736885	0.811386	0.865314	0.993281
14.2	0.211296	0.34069	0.472628	0.645773	0.735995	0.809593	0.864399	0.990831
14.3	0.212994	0.343684	0.475867	0.646527	0.738215	0.810553	0.866161	0.989478
14.4	0.214905	0.348619	0.478169	0.651718	0.739558	0.814002	0.865474	0.992123
14.5	0.216639	0.351212	0.480153	0.649537	0.740492	0.813735	0.863277	0.988447
14.6	0.216567	0.351484	0.480189	0.653939	0.743383	0.815278	0.866639	0.991498
14.7	0.219135	0.353823	0.485442	0.65824	0.744593	0.813313	0.870218	0.992218
14.8	0.220243	0.356076	0.487245	0.65976	0.745285	0.815497	0.870372	0.989327
14.9	0.223462	0.359971	0.489862	0.659271	0.743561	0.818116	0.87216	0.992601
15	0.224107	0.359565	0.494556	0.662678	0.749136	0.819958	0.875316	0.996838
15.1	0.226518	0.363439	0.496169	0.66782	0.751158	0.820832	0.867738	0.991053
15.2	0.227511	0.367218	0.499673	0.668124	0.74902	0.824774	0.869083	0.997916
15.3	0.227683	0.365806	0.499964	0.668988	0.753367	0.820369	0.87129	0.99556
15.4	0.229993	0.37109	0.502318	0.669343	0.752948	0.820881	0.874347	0.999699
15.5	0.232046	0.370735	0.503347	0.674208	0.754512	0.825345	0.871123	0.997222
15.6	0.233708	0.373094	0.505865	0.67386	0.754147	0.825764	0.872775	0.996442
15.7	0.233796	0.374655	0.507255	0.675342	0.755765	0.827277	0.876806	0.997183
15.8	0.239059	0.377889	0.513285	0.671771	0.760213	0.824506	0.874653	0.997108
15.9	0.239545	0.382098	0.512798	0.674213	0.760864	0.822811	0.876055	1
16	0.24053	0.379978	0.514198	0.681563	0.763256	0.826893	0.875581	0.995982
16.1	0.241742	0.384333	0.514355	0.682044	0.764159	0.827781	0.87581	0.998518
16.2	0.243908	0.387644	0.51878	0.682386	0.763686	0.830588	0.877562	0.995809
16.3	0.245228	0.388331	0.5211	0.681907	0.766266	0.830305	0.881874	0.995552
16.4	0.248194	0.388858	0.521568	0.685172	0.763889	0.830454	0.880091	0.997003
16.5	0.246882	0.38999	0.525026	0.689087	0.768656	0.827084	0.875075	0.998593
16.6	0.247716	0.392702	0.525432	0.688606	0.768131	0.829396	0.878879	0.992944
16.7	0.251978	0.396064	0.525957	0.688434	0.770125	0.830104	0.879373	0.995544
16.8	0.255868	0.40025	0.533006	0.690183	0.770941	0.829378	0.882712	0.994629
16.9	0.254613	0.399141	0.531887	0.69283	0.773197	0.831792	0.87978	0.994958
17	0.25631	0.402791	0.532929	0.700697	0.774709	0.831128	0.884436	0.993795
17.1	0.257653	0.403298	0.536445	0.694183	0.774174	0.832774	0.878221	0.992691
17.2	0.257445	0.404883	0.534094	0.697597	0.773683	0.831961	0.88288	0.997175
17.3	0.25868	0.407548	0.540775	0.699681	0.776376	0.840021	0.878434	0.990849
17.4	0.261695	0.408597	0.543093	0.697906	0.777701	0.83873	0.877344	0.995992
17.5	0.263287	0.411967	0.5436	0.70125	0.775921	0.840461	0.885506	0.996766
17.6	0.263555	0.413313	0.542715	0.700329	0.777799	0.833348	0.881884	0.994575
17.7	0.263689	0.412608	0.545174	0.698701	0.781128	0.837456	0.881223	0.992745
17.8	0.268247	0.414098	0.550774	0.70753	0.778689	0.837456	0.885563	0.993654
17.9	0.270426	0.421123	0.54646	0.70638	0.779541	0.83509	0.883379	0.989772
18	0.27083	0.418774	0.551636	0.704638	0.781527	0.841176	0.880665	0.989885
18.1	0.271743	0.421056	0.550751	0.706709	0.779088	0.834922	0.882453	0.994747
18.2	0.273107	0.422644	0.552462	0.70469	0.780855	0.837045	0.87978	0.989669
18.3	0.276482	0.42278	0.556408	0.707077	0.779278	0.841138	0.882815	0.994245
18.4	0.273518	0.425718	0.558592	0.709989	0.77935	0.835776	0.883482	0.987865
18.5	0.27554	0.431027	0.55923	0.710864	0.78113	0.841099	0.882072	0.987855
18.6	0.276739	0.430544	0.561643	0.710023	0.781779	0.836314	0.880444	0.992699
18.7	0.279095	0.434174	0.558384	0.712564	0.782149	0.836072	0.880297	0.984662
18.8	0.280513	0.433011	0.55896	0.711746	0.783127	0.830081	0.880004	0.987544
18.9	0.282507	0.432399	0.563825	0.71125	0.783765	0.835455	0.878334	0.987855
19	0.283484	0.43459	0.565878	0.713771	0.779561	0.836834	0.882409	0.984801
19.1	0.286209	0.440044	0.563544	0.717468	0.783374	0.833636	0.883762	0.982965
19.2	0.285154	0.441377	0.566361	0.715826	0.782051	0.832821	0.88067	0.988689
19.3	0.289267	0.439463	0.570503	0.715821	0.782905	0.839689	0.878643	0.981779
19.4	0.288905	0.44221	0.571946	0.72137	0.782391	0.832849	0.882772	0.985244
19.5	0.289697	0.443661	0.570423	0.719857	0.783587	0.831933	0.882026	0.983075
19.6	0.2905	0.445966	0.576171	0.721465	0.779191	0.83715	0.878681	0.981493
19.7	0.29345	0.447361	0.574889	0.721905	0.779273	0.840826	0.878355	0.983152
19.8	0.294996	0.446746	0.575512	0.720354	0.778234	0.837819	0.877274	0.978339
19.9	0.292771	0.450998	0.574388	0.723269	0.782862	0.83758	0.880014	0.982921
20	0.299802	0.451724	0.574395	0.725018	0.786036	0.83893	0.877266	0.976574
20.1	0.296861	0.452109	0.57872	0.727675	0.781115	0.838213	0.87545	0.979646
20.2	0.298891	0.454646	0.580058	0.725291	0.782864	0.84097	0.874449	0.977369
20.3	0.299833	0.457	0.579003	0.729376	0.784572	0.836769	0.875296	0.974622
20.4	0.30123	0.452544	0.578679	0.723572	0.782604	0.837659	0.874645	0.977531
20.5	0.301245	0.457424	0.580428	0.727688	0.786877	0.834416	0.876448	0.980191
20.6	0.302184	0.457934	0.583165	0.733276	0.780943	0.835802	0.878059	0.977148
20.7	0.304955	0.462544	0.582517	0.727099	0.785326	0.834907	0.871308	0.976785
20.8	0.30595	0.463099	0.583111	0.727398	0.78323	0.83635	0.869248	0.972759
20.9	0.308482	0.460859	0.586345	0.727055	0.781689	0.833639	0.871609	0.973608
21	0.305068	0.464098	0.587804	0.728334	0.788408	0.833934	0.870655	0.96942
21.1	0.306447	0.465497	0.589072	0.727961	0.779903	0.838755	0.872644	0.969114
21.2	0.308888	0.463565	0.590883	0.727645	0.780552	0.836507	0.867897	0.975944
21.3	0.30727	0.468175	0.589774	0.730469	0.783585	0.834104	0.871908	0.971005
21.4	0.314224	0.468082	0.591086	0.729911	0.784238	0.834037	0.868296	0.969484
21.5	0.312029	0.469821	0.593697	0.726659	0.787487	0.837302	0.871519	0.967712
21.6	0.314823	0.470254	0.59148	0.726793	0.779052	0.830438	0.873374	0.968453
21.7	0.31588	0.473181	0.592051	0.732571	0.780582	0.833945	0.870678	0.970423
21.8	0.316529	0.474215	0.593803	0.731583	0.78228	0.83069	0.871164	0.96967
21.9	0.318543	0.475473	0.596203	0.73219	0.783561	0.833199	0.869531	0.965759
22	0.320969	0.475352	0.598603	0.731254	0.780672	0.830683	0.867599	0.966179
22.1	0.319466	0.47375	0.594333	0.730305	0.784233	0.82775	0.865348	0.963709
22.2	0.321054	0.478136	0.596386	0.728872	0.784349	0.823953	0.867434	0.961237
22.3	0.321527	0.4805	0.598426	0.729751	0.782445	0.834027	0.863959	0.960555
22.4	0.325113	0.480034	0.599925	0.72926	0.786191	0.823619	0.867133	0.96756
22.5	0.324722	0.478931	0.596242	0.731015	0.780415	0.826739	0.864128	0.961818
22.6	0.324406	0.482026	0.604469	0.727899	0.779559	0.824676	0.86198	0.958142
22.7	0.3242	0.482733	0.602169	0.728105	0.779085	0.826225	0.867758	0.956848
22.8	0.32659	0.482234	0.59797	0.730835	0.781413	0.82633	0.862672	0.956938
22.9	0.327436	0.48723	0.605636	0.729867	0.78076	0.826134	0.863791	0.957383
23	0.329034	0.483651	0.601675	0.729476	0.78325	0.822397	0.860318	0.953391
23.1	0.330706	0.486826	0.602984	0.730086	0.783765	0.820845	0.860411	0.95656
23.2	0.330724	0.486299	0.605014	0.730335	0.78131	0.821025	0.862227	0.952315
23.3	0.329607	0.488568	0.606256	0.73254	0.777655	0.821928	0.859943	0.956928
23.4	0.331591	0.49103	0.605788	0.729893	0.779114	0.818563	0.858909	0.95337
23.5	0.331887	0.491475	0.605009	0.730374	0.781411	0.822235	0.856439	0.95132
23.6	0.33457	0.489774	0.604523	0.728869	0.77667	0.816948	0.859899	0.952369
23.7	0.334374	0.49416	0.605824	0.729427	0.78536	0.82386	0.859325	0.948387
23.8	0.335568	0.49547	0.606789	0.734331	0.777354	0.815844	0.856053	0.950779
23.9	0.33847	0.496144	0.612042	0.731563	0.777462	0.817161	0.853813	0.944425
24	0.337073	0.497638	0.607612	0.73049	0.778347	0.822029	0.855189	0.945267
24.1	0.340188	0.495475	0.613339	0.727992	0.778496	0.819009	0.852158	0.944137
24.2	0.340494	0.494292	0.610375	0.731609	0.77943	0.818211	0.854139	0.945215
24.3	0.33902	0.49885	0.611764	0.733775	0.777025	0.817848	0.849828	0.942882
24.4	0.3414	0.496602	0.614483	0.727457	0.774897	0.818587	0.850334	0.937734
24.5	0.340569	0.497517	0.61161	0.730649	0.774995	0.813827	0.854206	0.94301
24.6	0.342084	0.497978	0.61303	0.73218	0.775497	0.813609	0.847646	0.939705
24.7	0.343697	0.502529	0.609783	0.727079	0.770611	0.813411	0.848505	0.938436
24.8	0.344412	0.499599	0.613827	0.732154	0.767743	0.816696	0.845035	0.933235
24.9	0.345712	0.503581	0.613786	0.731238	0.776664	0.811278	0.849691	0.93385
25	0.344551	0.500815	0.613995	0.732224	0.770009	0.812106	0.849884	0.934318
25.1	0.34726	0.50575	0.613413	0.729332	0.772227	0.811715	0.850738	0.934377
25.2	0.344796	0.507237	0.608991	0.730945	0.778164	0.812858	0.840888	0.934979
25.3	0.34964	0.503668	0.612852	0.733289	0.771182	0.810522	0.842874	0.928975
25.4	0.347824	0.505657	0.615307	0.731858	0.771033	0.807417	0.844595	0.931948
25.5	0.34901	0.508116	0.615443	0.733294	0.769875	0.807756	0.841333	0.924403
25.6	0.351492	0.505819	0.616287	0.725159	0.772826	0.807939	0.841096	0.924161
25.7	0.351708	0.506496	0.61321	0.730384	0.768471	0.80959	0.840628	0.926315
25.8	0.352146	0.507067	0.616786	0.728442	0.769986	0.807821	0.836378	0.924591
25.9	0.352287	0.50771	0.617082	0.728612	0.768389	0.805459	0.838753	0.924064
26	0.353915	0.505999	0.619225	0.730878	0.773914	0.803617	0.836463	0.921442
26.1	0.35311	0.507216	0.616287	0.732615	0.773235	0.806534	0.837196	0.919225
26.2	0.356694	0.509346	0.617637	0.728005	0.766614	0.806241	0.833441	0.919701
26.3	0.354281	0.508937	0.617028	0.724959	0.76649	0.801212	0.832159	0.9194
26.4	0.356331	0.508423	0.620555	0.728247	0.766014	0.802308	0.83094	0.92215
26.5	0.358433	0.510298	0.621105	0.726137	0.763634	0.800139	0.833003	0.921329
26.6	0.357496	0.510493	0.617745	0.726294	0.765664	0.798817	0.834845	0.915124
26.7	0.355958	0.511641	0.616853	0.727073	0.768774	0.803473	0.828367	0.910874
26.8	0.358754	0.513701	0.62082	0.730917	0.764249	0.798858	0.828599	0.909567
26.9	0.359858	0.514903	0.617676	0.729438	0.76233	0.801068	0.832707	0.908559
27	0.358152	0.5133	0.623114	0.723814	0.763755	0.802611	0.831004	0.909724
27.1	0.362719	0.513915	0.620128	0.726271	0.760892	0.797554	0.829553	0.914494
27.2	0.361083	0.514242	0.619721	0.728059	0.76091	0.795637	0.824722	0.908348
27.3	0.36304	0.517033	0.618955	0.730454	0.7561	0.796957	0.828458	0.90763
27.4	0.359683	0.515749	0.620915	0.727493	0.762973	0.797348	0.829535	0.906295
27.5	0.365232	0.516269	0.622111	0.728571	0.760156	0.795935	0.82642	0.903985
27.6	0.364512	0.516945	0.621486	0.723894	0.754785	0.791457	0.822371	0.907023
27.7	0.36019	0.516873	0.61739	0.723721	0.759161	0.791876	0.817424	0.900085
27.8	0.36622	0.516894	0.615584	0.724269	0.757679	0.788969	0.82109	0.901371
27.9	0.365693	0.518448	0.616868	0.726083	0.758471	0.795853	0.822734	0.899825
28	0.365664	0.51765	0.613889	0.725005	0.754291	0.793021	0.817524	0.894801
28.1	0.368291	0.519935	0.615855	0.726047	0.754541	0.787178	0.820413	0.900134
28.2	0.367653	0.517295	0.615098	0.726353	0.755243	0.788418	0.816022	0.899277
28.3	0.367218	0.522569	0.616781	0.723675	0.755176	0.793468	0.817709	0.897633
28.4	0.367383	0.521416	0.615945	0.72454	0.755387	0.782983	0.818049	0.893674
28.5	0.368363	0.522394	0.614653	0.723292	0.754093	0.787112	0.818654	0.894194
28.6	0.368486	0.521332	0.616806	0.722548	0.749995	0.787973	0.808669	0.892326
28.7	0.37304	0.519122	0.616541	0.718214	0.75205	0.783695	0.809369	0.890464
28.8	0.372875	0.521285	0.614332	0.72066	0.750978	0.784771	0.810126	0.888346
28.9	0.372793	0.524681	0.613141	0.719513	0.753162	0.78243	0.807921	0.886991
29	0.372927	0.522296	0.61357	0.714393	0.755052	0.779129	0.809099	0.883528
29.1	0.372358	0.522847	0.616758	0.716559	0.751592	0.785329	0.811407	0.884084
29.2	0.373474	0.523899	0.619109	0.722919	0.750486	0.781246	0.8056	0.884963
29.3	0.372036	0.521563	0.620385	0.719145	0.748274	0.781138	0.807056	0.874699
29.4	0.374282	0.519999	0.616642	0.717625	0.746712	0.776971	0.812786	0.882499
29.5	0.376508	0.523168	0.614784	0.717586	0.746923	0.780919	0.805518	0.88255
29.6	0.376662	0.525334	0.616464	0.718085	0.74584	0.78005	0.804168	0.877804
29.7	0.375484	0.521982	0.615546	0.713964	0.746898	0.783104	0.803864	0.878512
29.8	0.375504	0.522217	0.614823	0.716266	0.746329	0.775988	0.805431	0.878676
29.9	0.375548	0.523348	0.615386	0.714823	0.746445	0.776243	0.800664	0.873711

## Sheet: DLDD n=4
x correct	19	17.2667	15.5333	13.8	12.0666	10.3333	8.59996	6.86662
time	100	158.382	250.848	397.299	629.249	996.618	1578.46	2500
0	0.00279623	0.00348472	0.00388634	0.00551093	0.00704493	0.00865141	0.0106565	0.01518
0.1	0.0032824	0.00405544	0.00532975	0.00690603	0.00884467	0.0114567	0.014117	0.0206909
0.2	0.00375045	0.00494021	0.00614205	0.00833434	0.0104481	0.0137366	0.0181362	0.0265129
0.3	0.00414301	0.00594577	0.00746467	0.00973548	0.0131266	0.0167864	0.0220498	0.0323016
0.4	0.0048466	0.00664633	0.00863933	0.0114174	0.0143465	0.0192415	0.0259512	0.0376646
0.5	0.0054143	0.0077455	0.0100344	0.0134769	0.0181091	0.0228409	0.0307857	0.0441056
0.6	0.00607561	0.00847023	0.0112423	0.015642	0.0206577	0.026845	0.0354904	0.0502899
0.7	0.00687281	0.00978379	0.0131719	0.0175384	0.0235445	0.030215	0.0422213	0.0581803
0.8	0.00805955	0.0115262	0.0141019	0.0197971	0.0268179	0.03466	0.0482184	0.0654155
0.9	0.00894734	0.0125891	0.016877	0.0226658	0.029762	0.0389691	0.0523493	0.0740005
1	0.0101462	0.0147361	0.0192656	0.0255435	0.0340923	0.0435047	0.0582347	0.0825432
1.1	0.0106565	0.0162912	0.0198937	0.0279049	0.0372086	0.0494051	0.0655997	0.0923783
1.2	0.0119731	0.0172122	0.0221434	0.0318607	0.0415871	0.0535814	0.0735505	0.101093
1.3	0.0133017	0.0186526	0.0251208	0.0337511	0.0464549	0.0601039	0.0795295	0.113087
1.4	0.0142076	0.0205309	0.027461	0.0374472	0.0504771	0.0641986	0.0870516	0.121096
1.5	0.0156148	0.0226899	0.0294601	0.0406299	0.05629	0.071467	0.0939938	0.131719
1.6	0.0163124	0.0241364	0.0335216	0.0443471	0.0605689	0.0762381	0.104457	0.144909
1.7	0.0185167	0.0263619	0.0340138	0.0483603	0.064875	0.0832649	0.11361	0.154288
1.8	0.0192717	0.0281012	0.037891	0.0509361	0.0706396	0.0907356	0.122491	0.164265
1.9	0.0205309	0.0295869	0.0399897	0.0545718	0.0750695	0.0991575	0.128799	0.179276
2	0.0221434	0.0324254	0.0422032	0.0599952	0.0815074	0.103261	0.140038	0.187954
2.1	0.0236985	0.0344275	0.0461227	0.0629756	0.086967	0.110448	0.148439	0.203237
2.2	0.0246558	0.0375498	0.0490639	0.0667864	0.0922183	0.119015	0.157652	0.214054
2.3	0.0267544	0.0390476	0.0521047	0.0716572	0.0966481	0.124275	0.167019	0.225374
2.4	0.0287927	0.0411312	0.0550429	0.0754318	0.105928	0.131012	0.17891	0.237933
2.5	0.0305955	0.0435952	0.0582105	0.080212	0.109935	0.140573	0.187039	0.252322
2.6	0.0304324	0.0458057	0.0615745	0.0847778	0.1181	0.146567	0.195621	0.262794
2.7	0.0326821	0.048922	0.0654336	0.0872811	0.122587	0.155121	0.206646	0.278642
2.8	0.035427	0.0504016	0.0692354	0.0941871	0.128648	0.160998	0.215862	0.286125
2.9	0.0366711	0.0532915	0.0707453	0.0982486	0.135898	0.170413	0.227065	0.300876
3	0.0385644	0.0556921	0.07577	0.102881	0.142058	0.179925	0.237224	0.312523
3.1	0.0398387	0.0600072	0.0786387	0.105852	0.148587	0.186571	0.245208	0.328914
3.2	0.0420552	0.0621875	0.0814742	0.112281	0.154922	0.195316	0.25767	0.339054
3.3	0.0439757	0.0650894	0.0852579	0.117433	0.16136	0.202663	0.263854	0.35427
3.4	0.0467599	0.0674387	0.0886309	0.120649	0.168079	0.212988	0.279342	0.361762
3.5	0.0470316	0.0692052	0.0924115	0.127431	0.174786	0.216693	0.28642	0.37558
3.6	0.0499154	0.0723789	0.0965243	0.133244	0.182265	0.225894	0.297171	0.390847
3.7	0.0510569	0.076075	0.101389	0.137598	0.188105	0.233274	0.306776	0.404222
3.8	0.0521047	0.0773131	0.105855	0.142116	0.196228	0.2448	0.313984	0.415929
3.9	0.0553267	0.0810515	0.107136	0.148487	0.202147	0.249456	0.324562	0.426141
4	0.0581803	0.0841013	0.111719	0.152561	0.207419	0.25876	0.336885	0.439576
4.1	0.0597747	0.0864325	0.113794	0.155819	0.214241	0.265289	0.348004	0.450486
4.2	0.0597355	0.0904276	0.117777	0.161695	0.221986	0.274423	0.356124	0.461285
4.3	0.0641231	0.0915781	0.123837	0.167508	0.228992	0.284283	0.369661	0.472482
4.4	0.0670341	0.0951383	0.12606	0.173149	0.234204	0.29246	0.375673	0.484953
4.5	0.067333	0.0983452	0.13055	0.179013	0.241904	0.300915	0.388199	0.499903
4.6	0.0696884	0.1008	0.134675	0.184458	0.249786	0.308999	0.399774	0.508156
4.7	0.072243	0.104339	0.139199	0.189359	0.256918	0.319311	0.407773	0.518943
4.8	0.0736593	0.107785	0.144172	0.193973	0.267004	0.325118	0.41505	0.531323
4.9	0.0764645	0.110644	0.147578	0.20154	0.270851	0.334077	0.422436	0.538658
5	0.0791551	0.113549	0.15196	0.204237	0.278941	0.337849	0.434437	0.552615
5.1	0.0813987	0.116234	0.155297	0.209883	0.285841	0.348541	0.441029	0.563018
5.2	0.0828421	0.120286	0.161807	0.216946	0.290343	0.356767	0.454442	0.570751
5.3	0.0848623	0.124112	0.163767	0.222373	0.296186	0.365159	0.45963	0.584077
5.4	0.0876072	0.128304	0.166312	0.22814	0.304925	0.37019	0.470824	0.596917
5.5	0.090032	0.127769	0.17118	0.232244	0.309554	0.383253	0.479931	0.606151
5.6	0.0910496	0.134038	0.175987	0.236825	0.317638	0.387562	0.489211	0.621857
5.7	0.0935892	0.136526	0.179934	0.243906	0.323309	0.395993	0.498285	0.625927
5.8	0.0967901	0.138728	0.185554	0.247617	0.331978	0.403394	0.507878	0.635282
5.9	0.0972189	0.144903	0.190041	0.252428	0.338631	0.411904	0.51621	0.645631
6	0.101718	0.144347	0.194833	0.257631	0.343943	0.416931	0.524601	0.655402
6.1	0.101383	0.149647	0.196835	0.265213	0.351966	0.424988	0.530656	0.662656
6.2	0.105287	0.150051	0.199318	0.268882	0.356616	0.435068	0.537477	0.672599
6.3	0.107857	0.15745	0.205055	0.274589	0.364655	0.4371	0.545401	0.677068
6.4	0.10911	0.158516	0.209675	0.282797	0.372959	0.445957	0.553769	0.688573
6.5	0.112921	0.161744	0.2155	0.283917	0.379001	0.453901	0.562806	0.702229
6.6	0.113658	0.166134	0.215126	0.291385	0.38139	0.461958	0.570489	0.705641
6.7	0.116632	0.167695	0.221533	0.295806	0.390672	0.467997	0.579901	0.712435
6.8	0.119272	0.171663	0.226963	0.300036	0.399019	0.475199	0.586191	0.722844
6.9	0.122346	0.17519	0.228415	0.308519	0.400957	0.479385	0.595839	0.729729
7	0.123816	0.179599	0.235656	0.309877	0.411191	0.486499	0.602177	0.738401
7.1	0.124801	0.179514	0.238208	0.315687	0.416808	0.497373	0.610355	0.746796
7.2	0.130052	0.185406	0.242925	0.31791	0.416327	0.500547	0.612462	0.751314
7.3	0.129747	0.187758	0.247171	0.324049	0.428467	0.509201	0.623871	0.756831
7.4	0.132368	0.18963	0.25003	0.334533	0.431233	0.514597	0.628331	0.763567
7.5	0.136562	0.192955	0.255529	0.336185	0.440705	0.521672	0.637462	0.772482
7.6	0.136629	0.196947	0.258579	0.340138	0.443417	0.527008	0.639413	0.779101
7.7	0.138108	0.201184	0.261804	0.349321	0.449254	0.536257	0.649378	0.786771
7.8	0.143242	0.202727	0.267535	0.350583	0.455955	0.540307	0.656743	0.794951
7.9	0.144389	0.206296	0.272672	0.356045	0.462187	0.542254	0.658301	0.800414
8	0.147358	0.210762	0.27741	0.362052	0.467889	0.550583	0.667979	0.806661
8.1	0.149453	0.213136	0.279557	0.366829	0.472648	0.553497	0.671014	0.810185
8.2	0.151253	0.215775	0.282419	0.368746	0.476794	0.565358	0.683135	0.816167
8.3	0.151754	0.219543	0.28594	0.374583	0.482003	0.568296	0.685823	0.823596
8.4	0.157906	0.220742	0.291463	0.380481	0.487936	0.572608	0.692233	0.827081
8.5	0.158522	0.226957	0.295501	0.383754	0.495027	0.579717	0.70022	0.836052
8.6	0.159986	0.228666	0.297904	0.38995	0.499257	0.586155	0.698943	0.842566
8.7	0.163897	0.231613	0.305182	0.393015	0.504406	0.588256	0.708775	0.848098
8.8	0.164398	0.236514	0.309509	0.401392	0.510297	0.593348	0.708887	0.848475
8.9	0.163903	0.238435	0.309808	0.402618	0.514289	0.598218	0.716959	0.857018
9	0.170419	0.240615	0.314712	0.406948	0.520323	0.606079	0.722714	0.856251
9.1	0.171083	0.244199	0.318577	0.412544	0.528415	0.613275	0.726123	0.861602
9.2	0.173801	0.248064	0.320685	0.418638	0.527537	0.61396	0.72965	0.874019
9.3	0.176881	0.251181	0.325649	0.419389	0.53444	0.619417	0.735913	0.869939
9.4	0.180127	0.254379	0.332296	0.42959	0.54031	0.62378	0.739881	0.878198
9.5	0.182401	0.257933	0.333138	0.426471	0.5415	0.630281	0.741702	0.88283
9.6	0.183694	0.257604	0.337698	0.433642	0.54746	0.631112	0.752766	0.886481
9.7	0.185865	0.264356	0.340316	0.43594	0.552316	0.634956	0.755768	0.88678
9.8	0.187154	0.266327	0.344229	0.442264	0.55369	0.64028	0.756966	0.893212
9.9	0.188758	0.26813	0.347768	0.44846	0.559603	0.647177	0.766412	0.896301
10	0.192478	0.272645	0.347928	0.44747	0.563208	0.652162	0.768351	0.902219
10.1	0.194347	0.274432	0.352213	0.453648	0.569996	0.658368	0.769691	0.902766
10.2	0.200196	0.278965	0.358509	0.456734	0.574592	0.655982	0.773575	0.909892
10.3	0.198252	0.280511	0.359859	0.463181	0.5775	0.665412	0.779439	0.910243
10.4	0.199568	0.286248	0.365458	0.465114	0.579771	0.667828	0.783002	0.916198
10.5	0.202823	0.286472	0.367529	0.47012	0.583023	0.669389	0.787384	0.915352
10.6	0.206067	0.289005	0.37503	0.472642	0.587852	0.676289	0.791732	0.918363
10.7	0.207712	0.292846	0.377621	0.479273	0.589322	0.677093	0.791512	0.925208
10.8	0.21078	0.294713	0.377467	0.476875	0.597602	0.684953	0.796796	0.925211
10.9	0.210829	0.29926	0.385853	0.481423	0.596887	0.683923	0.79978	0.926975
11	0.213516	0.298714	0.384527	0.486753	0.605306	0.69034	0.801839	0.93379
11.1	0.217297	0.305822	0.388764	0.490464	0.603189	0.691638	0.804865	0.936991
11.2	0.216814	0.307909	0.392399	0.495422	0.610711	0.696959	0.806021	0.93777
11.3	0.220304	0.309705	0.39307	0.50055	0.612628	0.702902	0.812477	0.93938
11.4	0.222542	0.312837	0.399499	0.501039	0.618233	0.705022	0.81595	0.938652
11.5	0.22529	0.315875	0.399212	0.503107	0.617653	0.703889	0.816838	0.946286
11.6	0.225133	0.320057	0.402238	0.504472	0.626066	0.709213	0.82352	0.944414
11.7	0.228657	0.318562	0.404019	0.510895	0.627694	0.716578	0.82539	0.953418
11.8	0.22952	0.320135	0.41149	0.514576	0.632154	0.71502	0.824891	0.949946
11.9	0.23286	0.324656	0.412091	0.519196	0.629982	0.718909	0.824819	0.95838
12	0.234292	0.326166	0.416077	0.517907	0.63594	0.718758	0.829502	0.951594
12.1	0.236034	0.331088	0.419456	0.521971	0.639549	0.721947	0.836125	0.959956
12.2	0.238601	0.330363	0.420981	0.527032	0.638966	0.72985	0.832462	0.961312
12.3	0.240515	0.3353	0.421884	0.530632	0.641937	0.727274	0.833694	0.962616
12.4	0.244075	0.336245	0.42468	0.533959	0.646558	0.730294	0.841796	0.964763
12.5	0.245866	0.340095	0.42795	0.537266	0.653231	0.732477	0.842946	0.96601
12.6	0.247971	0.345135	0.432939	0.540349	0.652657	0.737423	0.846515	0.966367
12.7	0.249885	0.344845	0.435509	0.54134	0.655143	0.738755	0.847717	0.966756
12.8	0.251314	0.347811	0.438281	0.544954	0.65729	0.740416	0.846509	0.968052
12.9	0.252633	0.349638	0.442439	0.54548	0.660309	0.743136	0.847309	0.969996
13	0.25382	0.350658	0.443776	0.549058	0.667683	0.741974	0.855182	0.973052
13.1	0.257078	0.352917	0.444697	0.548886	0.664208	0.747977	0.853319	0.974991
13.2	0.258926	0.354496	0.450601	0.554427	0.666545	0.752099	0.859763	0.974906
13.3	0.259246	0.356782	0.450257	0.55818	0.667629	0.75452	0.861457	0.979092
13.4	0.259086	0.362055	0.454798	0.564848	0.673665	0.756598	0.857558	0.9766
13.5	0.265965	0.364072	0.45536	0.561215	0.677947	0.758362	0.866098	0.980254
13.6	0.2673	0.366554	0.459769	0.568311	0.675637	0.756356	0.8611	0.983525
13.7	0.265334	0.368888	0.460566	0.568076	0.679998	0.755366	0.862885	0.982105
13.8	0.267309	0.370733	0.463619	0.571911	0.679992	0.764135	0.868009	0.978427
13.9	0.272862	0.371364	0.466412	0.571585	0.685895	0.764957	0.86303	0.985952
14	0.272702	0.37522	0.468686	0.575039	0.682637	0.767206	0.86759	0.985937
14.1	0.273046	0.377724	0.471542	0.576027	0.690391	0.76524	0.870018	0.986103
14.2	0.277866	0.380946	0.472838	0.580804	0.687124	0.769172	0.871609	0.98703
14.3	0.277386	0.382063	0.473702	0.579835	0.690518	0.773224	0.872346	0.988163
14.4	0.27946	0.383506	0.480535	0.581852	0.693897	0.772367	0.872959	0.987677
14.5	0.280541	0.386882	0.480481	0.584476	0.695129	0.775003	0.873789	0.992858
14.6	0.283546	0.389796	0.485493	0.5863	0.696419	0.776815	0.874124	0.991219
14.7	0.282869	0.387906	0.486064	0.590905	0.696518	0.777663	0.876984	0.988169
14.8	0.288833	0.389081	0.489803	0.588235	0.704074	0.775513	0.874758	0.989102
14.9	0.288468	0.391548	0.490856	0.590585	0.69942	0.779279	0.876966	0.990494
15	0.287305	0.396512	0.491838	0.595129	0.703926	0.781039	0.878122	0.989078
15.1	0.291445	0.397113	0.49089	0.596201	0.702047	0.782903	0.880629	0.987767
15.2	0.293396	0.399064	0.493468	0.597442	0.701015	0.787411	0.882498	0.992861
15.3	0.29487	0.397409	0.494851	0.601567	0.711094	0.785729	0.879877	0.995703
15.4	0.29512	0.405858	0.494549	0.60237	0.707404	0.788105	0.88225	0.991877
15.5	0.29878	0.404862	0.497497	0.601836	0.708667	0.78578	0.884104	0.995063
15.6	0.299061	0.406221	0.502105	0.610279	0.711925	0.787867	0.881658	0.990666
15.7	0.300387	0.410403	0.502488	0.606369	0.71332	0.78139	0.887378	0.996464
15.8	0.300193	0.408153	0.503992	0.606474	0.712867	0.788673	0.88366	0.993505
15.9	0.302657	0.412637	0.507456	0.610971	0.715183	0.788359	0.884808	0.992892
16	0.304714	0.412112	0.512674	0.610765	0.715286	0.793885	0.890062	0.995268
16.1	0.306347	0.413549	0.511318	0.613507	0.723391	0.793782	0.889078	0.994722
16.2	0.308473	0.417369	0.512082	0.617976	0.717475	0.794513	0.889205	0.996165
16.3	0.305605	0.416971	0.51393	0.620054	0.720024	0.794371	0.886671	0.995966
16.4	0.309778	0.41983	0.513099	0.619703	0.724662	0.794719	0.887631	0.990515
16.5	0.311001	0.421687	0.514594	0.617276	0.725075	0.793852	0.888371	0.997249
16.6	0.314757	0.424318	0.516992	0.624752	0.723699	0.795869	0.890243	0.999321
16.7	0.317351	0.427222	0.521376	0.622134	0.72128	0.796035	0.89323	0.992617
16.8	0.316629	0.428708	0.519933	0.62401	0.725927	0.801048	0.896035	0.992339
16.9	0.319432	0.423119	0.523312	0.62574	0.729499	0.794975	0.885786	0.992677
17	0.318242	0.429294	0.523584	0.627244	0.731393	0.80237	0.893927	0.998828
17.1	0.317883	0.429723	0.523025	0.627678	0.728385	0.802056	0.891808	1
17.2	0.324553	0.434965	0.52882	0.627854	0.729348	0.80132	0.891726	0.999985
17.3	0.318284	0.43713	0.531184	0.628252	0.732447	0.802419	0.891747	0.996434
17.4	0.323994	0.435964	0.529732	0.63338	0.72965	0.805007	0.888561	0.994921
17.5	0.324767	0.436122	0.530414	0.63299	0.731683	0.804804	0.890817	0.994972
17.6	0.327944	0.435255	0.536263	0.633398	0.734926	0.804128	0.890844	0.995341
17.7	0.327171	0.43797	0.53472	0.635403	0.733452	0.803264	0.892107	0.998448
17.8	0.330602	0.439265	0.53559	0.630894	0.73328	0.801389	0.891276	0.997285
17.9	0.329545	0.442738	0.538797	0.635602	0.731692	0.807845	0.891548	0.991599
18	0.33245	0.44387	0.538567	0.63787	0.737166	0.803907	0.896699	0.995673
18.1	0.335101	0.450048	0.539491	0.639751	0.73915	0.801664	0.892393	0.993921
18.2	0.332441	0.447557	0.541968	0.642526	0.736309	0.803862	0.894658	0.995156
18.3	0.334113	0.443713	0.540702	0.639893	0.73447	0.802835	0.892692	0.996573
18.4	0.33639	0.44795	0.541415	0.63996	0.739202	0.806876	0.897394	0.991934
18.5	0.33742	0.44878	0.545383	0.641702	0.742578	0.806861	0.891904	0.992786
18.6	0.343435	0.453847	0.5482	0.640467	0.739555	0.809119	0.892191	0.997258
18.7	0.341962	0.454699	0.549535	0.642994	0.741421	0.808358	0.894187	0.992961
18.8	0.340367	0.456042	0.547364	0.644577	0.741161	0.802609	0.894963	0.990274
18.9	0.342801	0.458235	0.549653	0.646461	0.742279	0.804068	0.894015	0.990252
19	0.342348	0.456927	0.546929	0.646742	0.741953	0.811227	0.8923	0.9905
19.1	0.342351	0.458941	0.55273	0.648976	0.738302	0.807317	0.89056	0.991629
19.2	0.344803	0.462435	0.552238	0.648994	0.741681	0.809624	0.89015	0.990298
19.3	0.345495	0.460424	0.552443	0.647738	0.739793	0.808201	0.892481	0.985113
19.4	0.349496	0.462033	0.551377	0.649565	0.748874	0.81319	0.89634	0.986587
19.5	0.350936	0.461692	0.55729	0.645809	0.746561	0.809056	0.894818	0.987293
19.6	0.351718	0.468169	0.558295	0.650151	0.743737	0.811837	0.89262	0.986454
19.7	0.350018	0.46438	0.560279	0.653633	0.74522	0.809666	0.895555	0.98739
19.8	0.353213	0.464824	0.558528	0.653995	0.741959	0.813214	0.890923	0.988217
19.9	0.350909	0.466714	0.564365	0.651936	0.745884	0.809479	0.891841	0.990926
20	0.354768	0.466361	0.556202	0.655928	0.74673	0.814362	0.891974	0.988154
20.1	0.351253	0.46788	0.560083	0.653029	0.745718	0.812879	0.887592	0.987761
20.2	0.355931	0.473025	0.567481	0.652669	0.743577	0.810771	0.891161	0.98505
20.3	0.354499	0.472844	0.562731	0.658117	0.746126	0.81165	0.890802	0.983494
20.4	0.359449	0.472608	0.563269	0.654228	0.746564	0.807169	0.90051	0.980224
20.5	0.358253	0.474402	0.565479	0.659521	0.746696	0.803615	0.890162	0.98145
20.6	0.360928	0.471201	0.565838	0.658192	0.751975	0.810617	0.884956	0.980109
20.7	0.360454	0.475981	0.570778	0.659575	0.749366	0.808715	0.888981	0.978829
20.8	0.361955	0.475858	0.565376	0.658561	0.744106	0.812659	0.887492	0.981716
20.9	0.363534	0.473532	0.56993	0.661707	0.74275	0.810454	0.884859	0.975435
21	0.363915	0.477829	0.5664	0.657317	0.746615	0.811819	0.883407	0.973895
21.1	0.364298	0.478892	0.568782	0.657401	0.748104	0.813567	0.891451	0.973158
21.2	0.362737	0.480762	0.572249	0.660696	0.749532	0.811475	0.888111	0.973131
21.3	0.368484	0.477376	0.576199	0.659636	0.749263	0.810505	0.888441	0.978264
21.4	0.367777	0.478442	0.571558	0.659443	0.746944	0.812209	0.885028	0.979838
21.5	0.370102	0.482317	0.572213	0.661417	0.746533	0.808673	0.888308	0.977431
21.6	0.371718	0.482806	0.575459	0.65838	0.750643	0.811762	0.890416	0.978587
21.7	0.370546	0.482912	0.57503	0.661242	0.748466	0.815337	0.883386	0.974879
21.8	0.370576	0.484678	0.574302	0.662828	0.745606	0.809947	0.883509	0.978017
21.9	0.374931	0.486149	0.57532	0.664177	0.748916	0.806317	0.885614	0.972098
22	0.37176	0.485134	0.576135	0.664283	0.75244	0.812468	0.884461	0.973656
22.1	0.372533	0.485364	0.580287	0.662438	0.746699	0.805369	0.885047	0.972155
22.2	0.37693	0.488181	0.576389	0.66335	0.74547	0.811852	0.886976	0.968752
22.3	0.378319	0.488504	0.574707	0.664032	0.747796	0.80741	0.883017	0.969163
22.4	0.376854	0.48941	0.577929	0.669459	0.75109	0.807287	0.883691	0.968532
22.5	0.37676	0.489981	0.579122	0.664787	0.747442	0.802585	0.881444	0.969432
22.6	0.378609	0.488577	0.57821	0.660952	0.748605	0.807546	0.879442	0.964576
22.7	0.379046	0.489963	0.582407	0.664066	0.745945	0.808911	0.881879	0.973076
22.8	0.379949	0.490757	0.579765	0.664286	0.745667	0.807896	0.883437	0.963368
22.9	0.381417	0.491176	0.579194	0.667333	0.747953	0.80546	0.876308	0.970196
23	0.381776	0.494154	0.580897	0.66364	0.750033	0.807749	0.877748	0.966192
23.1	0.38334	0.492034	0.578261	0.665515	0.750012	0.806513	0.884189	0.970739
23.2	0.37898	0.495018	0.582519	0.665249	0.747895	0.803892	0.877968	0.963359
23.3	0.382791	0.493952	0.582694	0.66496	0.74737	0.808576	0.876341	0.965065
23.4	0.384017	0.495486	0.580979	0.662734	0.749616	0.804771	0.877467	0.962085
23.5	0.387121	0.494797	0.584865	0.665406	0.74727	0.806595	0.878325	0.960539
23.6	0.388151	0.494048	0.584017	0.662547	0.750399	0.805725	0.873418	0.957598
23.7	0.387755	0.495812	0.583407	0.666569	0.750577	0.805852	0.877996	0.958383
23.8	0.384494	0.498804	0.584204	0.663238	0.750858	0.805713	0.877198	0.958938
23.9	0.389815	0.499022	0.586481	0.664944	0.74695	0.807293	0.873273	0.956423
24	0.391702	0.495609	0.585632	0.669202	0.745096	0.806828	0.873614	0.961626
24.1	0.391189	0.500187	0.587607	0.670694	0.744942	0.805227	0.875006	0.958111
24.2	0.388284	0.498777	0.584168	0.665011	0.747146	0.805375	0.87067	0.954508
24.3	0.388646	0.502763	0.590379	0.663356	0.748656	0.802455	0.870268	0.951658
24.4	0.391448	0.501262	0.585074	0.66601	0.748889	0.803418	0.872904	0.953436
24.5	0.388444	0.505025	0.584138	0.668133	0.743043	0.802485	0.870887	0.952911
24.6	0.388299	0.506465	0.585475	0.665727	0.748052	0.802494	0.871718	0.946811
24.7	0.39134	0.504025	0.587547	0.663966	0.749239	0.799626	0.870504	0.950154
24.8	0.393278	0.503288	0.58713	0.672059	0.741907	0.801812	0.868559	0.946712
24.9	0.396404	0.501003	0.58858	0.667683	0.739963	0.802159	0.868804	0.953261
25	0.391333	0.502881	0.584322	0.665805	0.744897	0.798197	0.868106	0.945703
25.1	0.392638	0.505185	0.589978	0.665011	0.746763	0.802968	0.867164	0.946932
25.2	0.395785	0.501253	0.588987	0.665971	0.743215	0.800435	0.867686	0.946681
25.3	0.395002	0.50549	0.590071	0.671552	0.740449	0.800522	0.870014	0.94548
25.4	0.396452	0.506057	0.587961	0.666415	0.743176	0.797817	0.861801	0.943227
25.5	0.395241	0.506828	0.591913	0.669661	0.743015	0.794993	0.865147	0.941874
25.6	0.397315	0.506861	0.59015	0.665434	0.746032	0.798179	0.863202	0.943326
25.7	0.395606	0.505007	0.593426	0.663676	0.74268	0.797424	0.864404	0.935623
25.8	0.399502	0.509053	0.590243	0.66678	0.743864	0.799604	0.864727	0.938084
25.9	0.397264	0.510533	0.591475	0.67108	0.742632	0.794565	0.858214	0.937136
26	0.397639	0.507362	0.594386	0.668653	0.744631	0.800972	0.856459	0.938691
26.1	0.399846	0.511203	0.591705	0.666083	0.742149	0.797349	0.859171	0.931396
26.2	0.399417	0.506163	0.590216	0.663721	0.74268	0.792904	0.858201	0.936656
26.3	0.399179	0.507274	0.59175	0.664709	0.74127	0.793785	0.859403	0.934817
26.4	0.401507	0.506347	0.588788	0.668668	0.73633	0.794106	0.858111	0.933256
26.5	0.402035	0.507308	0.59313	0.664969	0.738284	0.79368	0.855318	0.93835
26.6	0.398107	0.508887	0.59089	0.665455	0.735723	0.793194	0.854327	0.938368
26.7	0.398952	0.510551	0.591457	0.664479	0.736288	0.788664	0.849242	0.932543
26.8	0.405118	0.508014	0.59082	0.664229	0.735509	0.788066	0.855423	0.925024
26.9	0.403461	0.50745	0.593363	0.666783	0.740147	0.789582	0.854336	0.926854
27	0.405278	0.510403	0.590473	0.667276	0.736309	0.790234	0.856423	0.927657
27.1	0.407226	0.508011	0.589661	0.666364	0.736227	0.788604	0.851875	0.923466
27.2	0.404605	0.512954	0.590784	0.663184	0.736279	0.791439	0.849946	0.930653
27.3	0.403817	0.512743	0.590452	0.668299	0.732341	0.785234	0.84605	0.924266
27.4	0.407712	0.511013	0.59195	0.664193	0.732126	0.79108	0.852823	0.923357
27.5	0.406245	0.51264	0.591992	0.663187	0.734575	0.789516	0.847448	0.925211
27.6	0.406341	0.509071	0.593459	0.662791	0.734763	0.781278	0.848484	0.919039
27.7	0.405907	0.50908	0.591599	0.664132	0.736122	0.787064	0.846126	0.924161
27.8	0.40729	0.514633	0.593317	0.666817	0.739507	0.786173	0.84647	0.921014
27.9	0.407283	0.511176	0.591427	0.665926	0.73261	0.78347	0.844592	0.917578
28	0.411568	0.509811	0.591101	0.665606	0.733265	0.789461	0.84605	0.919417
28.1	0.411596	0.51082	0.587414	0.661155	0.731806	0.780816	0.84499	0.917819
28.2	0.407546	0.514941	0.59403	0.664827	0.734995	0.781927	0.843308	0.916687
28.3	0.409705	0.511762	0.593339	0.664685	0.732815	0.783506	0.844308	0.917967
28.4	0.409122	0.514917	0.590751	0.661176	0.734319	0.781314	0.838516	0.910276
28.5	0.409261	0.515591	0.588951	0.660291	0.727839	0.780245	0.8415	0.912426
28.6	0.409805	0.513269	0.58963	0.664313	0.731082	0.778041	0.835527	0.912767
28.7	0.409186	0.511813	0.591654	0.66059	0.73068	0.778053	0.837526	0.914594
28.8	0.409542	0.517605	0.592889	0.664585	0.730037	0.777256	0.835282	0.909711
28.9	0.410789	0.51431	0.594797	0.664135	0.731737	0.778388	0.840068	0.909243
29	0.410777	0.517076	0.592345	0.664286	0.727989	0.776866	0.836949	0.905239
29.1	0.410213	0.513601	0.592209	0.666074	0.731369	0.776126	0.836248	0.91004
29.2	0.413371	0.513099	0.591826	0.658428	0.727183	0.774224	0.8346	0.910708
29.3	0.413486	0.513963	0.592988	0.659032	0.73116	0.776154	0.832646	0.909322
29.4	0.413975	0.515585	0.589633	0.655466	0.727458	0.773538	0.832033	0.902996
29.5	0.4129	0.511934	0.591044	0.657836	0.728648	0.771844	0.830801	0.905106
29.6	0.412954	0.51242	0.590563	0.66043	0.730348	0.774028	0.82956	0.900839
29.7	0.413465	0.517991	0.591968	0.656097	0.729412	0.774197	0.830759	0.906139
29.8	0.412209	0.515376	0.59271	0.663371	0.724704	0.777014	0.833186	0.902751
29.9	0.415108	0.514969	0.591288	0.656378	0.722699	0.774958	0.826776	0.902826

[truncated: 14 more sheets: DLDD n=5, DLDD n=6, DDLD n=1, DDLD n=2, DDLD n=3, DDLD n=4, DDLD n=5, DDLD n=6, DDDL n=1, DDDL n=2, DDDL n=3, DDDL n=4, DDDL n=5, DDDL n=6]
