# Supplementary material for: Towards a molecular mechanism underlying mitochondrial protein import through the TOM and TIM23 complexes
Source: eLife. 2022 Jun 8;11:e75426. doi: 10.7554/eLife.75426 (PMC9255969; doi:10.7554/eLife.75426)
Supplement: Figure 3—figure supplement 1—source data 3. [file elife-75426-fig3-figsupp1-data3.xlsx]

## Sheet: L
conc	A	k1	k2
100	0.949426	2.38674	0.389833
169.381	0.949766	2.53059	0.410833
286.901	0.938125	2.86405	0.430926
485.956	0.93409	3.31181	0.430924
823.119	0.948073	3.20782	0.42534
1394.21	0.937027	3.92173	0.401786
2361.53	0.959261	4.17101	0.375887
4000	1.00656	3.99566	0.363726
100	0.973479	3.81008	0.370701
169.381	0.936826	4.77377	0.395176
286.901	1.02079	4.58163	0.420891
485.956	0.878645	4.91586	0.415572
823.119	0.860212	3.792	0.414378
1394.21	0.865058	3.37348	0.391186
2361.53	0.903167	4.52092	0.332316
4000	0.946618	3.22552	0.32065
100	0.917914	2.20755	0.267415
158.382	0.940565	3.07115	0.270915
250.848	0.93621	3.72811	0.273223
397.299	0.945659	3.93153	0.279672
629.249	0.939952	3.40686	0.282433
996.618	0.96629	3.15803	0.272145
1578.46	0.991592	2.77859	0.266553
2500	1.00605	2.25095	0.270209
100	0.904969	3.33954	0.281371
158.382	0.916369	3.93353	0.288017
250.848	0.93098	4.68725	0.294101
397.299	0.931203	4.55817	0.295444
629.249	0.944545	4.10414	0.29288
996.618	0.955153	3.62116	0.278623
1578.46	0.96377	3.02332	0.276153
2500	0.991787	2.33805	0.284134

## Sheet: DL
conc	A	k1	k2
100	0.79614	0.593227	0.342453
169.381	0.846606	0.905522	0.308625
286.901	0.861832	1.14212	0.327578
485.956	0.887973	1.22749	0.34371
823.119	0.889208	1.46061	0.338189
1394.21	0.921455	1.70936	0.350686
2361.53	0.96309	1.81446	0.351871
4000	1.01446	1.88195	0.372997
100	0.843841	0.78059	0.275877
169.381	0.842187	1.00373	0.294305
286.901	0.877318	1.53695	0.332804
485.956	0.858217	1.74524	0.354361
823.119	0.851665	1.84651	0.33905
1394.21	0.885738	1.8578	0.36861
2361.53	0.924512	2.03285	0.344985
4000	1.01034	1.90913	0.340959
100	0.747284	1.18151	0.264306
158.382	0.789519	2.00298	0.282471
250.848	0.837694	2.89753	0.31635
397.299	0.854019	3.35849	0.318316
629.249	0.88904	3.51253	0.339964
996.618	0.922769	3.54795	0.352217
1578.46	0.950308	3.4698	0.334718
2500	0.999515	3.53566	0.33348
100	0.725968	0.866643	0.236307
158.382	0.790285	1.56198	0.252521
250.848	0.831347	2.10783	0.284001
397.299	0.866798	2.58568	0.305862
629.249	0.880049	2.71947	0.314518
996.618	0.912412	2.9445	0.314489
1578.46	0.94313	2.88819	0.312246
2500	1.00508	2.75373	0.321393

## Sheet: DDL
conc	A	k1	k2
100	0.687199	0.347572	0.24144
169.381	0.745104	0.618649	0.225323
286.901	0.801355	0.744593	0.266849
485.956	0.833354	0.935675	0.282556
823.119	0.898234	1.11578	0.282533
1394.21	0.872488	1.36019	0.291891
2361.53	0.938172	1.42845	0.306733
4000	1.01252	1.63545	0.319724
100	0.609478	0.253501	0.253442
169.381	0.647179	0.307311	0.293493
286.901	0.748391	0.867031	0.20374
485.956	0.803243	1.31994	0.208356
823.119	0.850341	1.41129	0.239264
1394.21	0.843306	1.34696	0.255402
2361.53	0.877983	1.55359	0.257729
4000	1.01438	1.69858	0.27955
100	0.578373	0.43129	0.155569
158.382	0.680969	0.527831	0.204167
250.848	0.738858	0.764776	0.208449
397.299	0.79331	1.01887	0.233401
629.249	0.825354	1.21439	0.239277
996.618	0.867589	1.42693	0.248722
1578.46	0.893505	1.51668	0.251595
2500	0.995256	1.63322	0.274719
100	0.644265	0.364509	0.148831
158.382	0.679389	0.425604	0.173412
250.848	0.766679	0.671457	0.190762
397.299	0.806962	0.880382	0.206605
629.249	0.863439	1.13762	0.213148
996.618	0.904003	1.41745	0.219743
1578.46	0.939872	1.46652	0.235192
2500	1.00833	1.63137	0.239735

## Sheet: DDDL len
conc	A	k1	k2
100	0.614423	0.204389	0.204431
169.381	0.678655	0.242999	0.243285
286.901	0.764669	0.351034	0.235399
485.956	0.83928	0.471241	0.235632
823.119	0.841296	0.531123	0.254006
1394.21	0.892459	0.593628	0.260772
2361.53	0.929707	0.613765	0.270422
4000	1.00215	0.658712	0.279054
100	0.598062	0.166021	0.166205
169.381	0.695936	0.195806	0.190186
286.901	0.792216	0.233447	0.233234
485.956	0.868418	0.270974	0.255334
823.119	0.908342	0.26992	0.269764
1394.21	0.95955	0.261117	0.261314
2361.53	1.00155	0.257498	0.257663
4000	1.01602	0.255217	0.255091
100	0.445277	0.200724	0.0982487
158.382	0.543665	0.153091	0.15304
250.848	0.621784	0.174315	0.174366
397.299	0.71719	0.201616	0.201619
629.249	0.790356	0.229989	0.229991
996.618	0.846383	0.29147	0.229782
1578.46	0.901954	0.334812	0.24877
2500	0.987404	0.455276	0.249836
100	0.479533	0.28647	0.0784805
158.382	0.531335	0.232681	0.105819
250.848	0.639768	0.256724	0.146357
397.299	0.708615	0.28538	0.17677
629.249	0.775725	0.39897	0.170211
996.618	0.832767	0.468474	0.196218
1578.46	0.898956	0.54631	0.221778
2500	0.965351	0.699361	0.240379

## Sheet: LDDD
conc	A	k1	k2
18	0.263352	0.135064	0.0542805
38.82	0.434552	0.100044	0.100044
83.58	0.597459	0.142876	0.142876
180	0.704928	0.209433	0.209433
388	0.791805	0.279983	0.279983
703.7	0.854244	0.346723	0.346723
1693	0.924359	0.411956	0.411955
3035	0.997903	0.50361	0.410304
100	0.668851	0.161489	0.161442
169.381	0.738572	0.196844	0.196983
286.901	0.816916	0.246469	0.246694
485.956	0.883982	0.287431	0.287198
823.119	0.894115	0.311589	0.311381
1394.21	0.91679	0.362116	0.33625
2361.53	0.966789	0.578315	0.263875
4000	1.01057	0.704027	0.267897
100	0.627372	0.145592	0.145591
169.381	0.69094	0.18365	0.18365
286.901	0.795582	0.226971	0.226971
485.956	0.860205	0.279323	0.279324
823.119	0.898464	0.330082	0.330082
1394.21	0.899244	0.36915	0.369154
2361.53	0.957944	0.544514	0.302306
4000	1.00685	0.587683	0.338393
100	0.591637	0.194373	0.194372
158.382	0.675631	0.221181	0.221183
250.848	0.736328	0.244249	0.244249
397.299	0.77956	0.282856	0.282858
629.249	0.838925	0.324739	0.324739
996.618	0.877045	0.356085	0.356085
1578.46	0.952293	0.371214	0.371214
2500	1.00827	0.400924	0.400924
100	0.609997	0.207224	0.207224
158.382	0.680429	0.235661	0.235661
250.848	0.730622	0.267543	0.267543
397.299	0.800351	0.346954	0.269706
629.249	0.833163	0.397839	0.269776
996.618	0.876487	0.466868	0.279454
1578.46	0.949839	0.374135	0.374135
2500	1.00028	0.635809	0.258812
100	0.629488	0.176978	0.176978
158.382	0.7177	0.208141	0.208141
250.848	0.796113	0.229507	0.229507
397.299	0.847321	0.263699	0.263698
629.249	0.880505	0.285136	0.285136
996.618	0.893074	0.308479	0.308479
1578.46	0.949278	0.447935	0.245801
2500	1.00377	0.399163	0.293237

## Sheet: DLDD
conc	A	k1	k2
18	0.148963	0.0833927	0.0833926
38.82	0.283219	0.0834836	0.0834836
83.58	0.510411	0.103569	0.103569
180	0.661585	0.138743	0.138743
388	0.78863	0.20465	0.20465
703.7	0.879583	0.260095	0.260095
1693	0.951949	0.312519	0.312519
3035	1.02296	0.382577	0.382577
100	0.481884	0.206803	0.0835426
169.381	0.615563	0.153592	0.153592
286.901	0.751595	0.190596	0.190596
485.956	0.802334	0.216203	0.216203
823.119	0.836511	0.258876	0.258876
1394.21	0.87786	0.294502	0.294502
2361.53	1.03254	0.374927	0.374925
4000	1.00638	0.425059	0.315664
100	0.455799	0.10817	0.108169
169.381	0.587313	0.136989	0.136989
286.901	0.677845	0.169678	0.169678
485.956	0.787178	0.221146	0.221146
823.119	0.844293	0.258861	0.258861
1394.21	0.887405	0.29558	0.295579
2361.53	0.92696	0.32515	0.32515
4000	1.031	0.367499	0.367499
100	0.450065	0.141662	0.141661
158.382	0.549976	0.164407	0.164407
250.848	0.630613	0.184734	0.184734
397.299	0.707573	0.212623	0.212623
629.249	0.788293	0.245032	0.245032
996.618	0.846554	0.269824	0.269824
1578.46	0.917429	0.310168	0.310168
2500	1.01129	0.349351	0.349351
100	0.389793	0.169057	0.119985
158.382	0.499768	0.160192	0.160192
250.848	0.580652	0.177963	0.177963
397.299	0.690292	0.208829	0.208829
629.249	0.757574	0.234521	0.23452
996.618	0.842452	0.274069	0.274071
1578.46	0.904519	0.313552	0.313552
2500	0.977583	0.38819	0.330721
100	0.366038	0.236035	0.0801243
158.382	0.491308	0.194511	0.128163
250.848	0.600048	0.182816	0.182816
397.299	0.680645	0.206955	0.206956
629.249	0.781638	0.239918	0.239918
996.618	0.853146	0.267013	0.267013
1578.46	0.94405	0.295767	0.295767
2500	1.0034	0.320974	0.320974

## Sheet: DDLD
conc	A	k1	k2
18	0.116402	0.102247	0.102247
38.82	0.225009	0.103859	0.103859
83.58	0.393376	0.111316	0.111316
180	0.577416	0.150183	0.150183
388	0.707624	0.202122	0.202122
703.7	0.824969	0.255728	0.255728
1693	0.911298	0.325742	0.325742
3035	0.999075	0.464398	0.318265
100	0.600266	0.273447	0.0932364
169.381	0.708298	0.245068	0.133647
286.901	0.806719	0.260587	0.181307
485.956	0.869062	0.249854	0.249854
823.119	0.916243	0.283653	0.283653
1394.21	0.922029	0.375724	0.26488
2361.53	0.979276	0.425098	0.291216
4000	1.00295	0.527399	0.293897
100	0.450112	0.115814	0.115814
169.381	0.569129	0.141369	0.141369
286.901	0.777817	0.174706	0.174706
485.956	0.789606	0.21941	0.21941
823.119	0.862152	0.248794	0.248793
1394.21	0.920355	0.282259	0.282259
2361.53	0.967107	0.317907	0.317906
4000	1.01226	0.36534	0.36534
100	0.334661	0.220674	0.0813004
158.382	0.410021	0.135608	0.135608
250.848	0.495061	0.145576	0.145576
397.299	0.593435	0.169381	0.169381
629.249	0.706353	0.191477	0.191477
996.618	0.791481	0.215233	0.215233
1578.46	0.891677	0.24116	0.24116
2500	1.00507	0.282438	0.282439
100	0.343882	0.236084	0.0751516
158.382	0.42628	0.17943	0.106609
250.848	0.527174	0.152554	0.152554
397.299	0.619924	0.174259	0.174259
629.249	0.717583	0.199447	0.199447
996.618	0.806357	0.22241	0.22241
1578.46	0.908516	0.251545	0.251545
2500	0.993315	0.279201	0.279201
100	0.364981	0.2045	0.0798342
158.382	0.435987	0.12984	0.12984
250.848	0.547127	0.144786	0.144786
397.299	0.633252	0.16475	0.16475
629.249	0.740874	0.187601	0.187601
996.618	0.782686	0.2149	0.2149
1578.46	0.897603	0.24	0.24
2500	1.0096	0.270638	0.270637

## Sheet: DDDL seq
conc	A	k1	k2
18	0.10908	0.141829	0.0763528
38.82	0.247238	0.154746	0.0706841
83.58	0.393551	0.116986	0.116985
180	0.573573	0.153196	0.153195
388	0.698519	0.210982	0.210982
703.7	0.784335	0.267211	0.267211
1693	0.898234	0.687753	0.206939
3035	1.0067	1.03265	0.22634
100	0.503834	0.227035	0.107407
169.381	0.587683	0.208797	0.162152
286.901	0.716284	0.28363	0.169264
485.956	0.764435	0.358689	0.197671
823.119	0.809985	0.424778	0.223755
1394.21	0.874089	0.620568	0.225271
2361.53	0.938985	0.745223	0.242641
4000	1.01363	0.931555	0.256332
100	0.502257	0.145636	0.145636
169.381	0.66576	0.174819	0.174819
286.901	0.745908	0.20881	0.20881
485.956	0.782321	0.249692	0.249692
823.119	0.821269	0.333737	0.25708
1394.21	0.889644	0.407422	0.258682
2361.53	0.964871	0.556215	0.258258
4000	1.00432	0.743319	0.260247
100	0.444224	0.221438	0.0980202
158.382	0.494103	0.152041	0.152041
250.848	0.602028	0.178795	0.178794
397.299	0.673572	0.197617	0.197617
629.249	0.747115	0.31067	0.175858
996.618	0.787096	0.352743	0.187501
1578.46	0.876929	0.497101	0.182987
2500	0.988465	0.713566	0.189034
100	0.437008	0.214688	0.111636
158.382	0.527786	0.190356	0.154581
250.848	0.606902	0.247462	0.154874
397.299	0.672342	0.248551	0.206267
629.249	0.732241	0.36223	0.179954
996.618	0.829147	0.536955	0.183973
1578.46	0.898183	0.642128	0.19895
2500	0.963187	0.799564	0.228328
100	0.444804	0.255392	0.078087
158.382	0.52079	0.188732	0.114053
250.848	0.605932	0.163182	0.163181
397.299	0.681537	0.187815	0.187815
629.249	0.783465	0.211491	0.211491
996.618	0.843139	0.234984	0.234984
1578.46	0.90422	0.266319	0.266319
2500	0.988326	0.402523	0.224023
