# Supplementary material for: Towards a molecular mechanism underlying mitochondrial protein import through the TOM and TIM23 complexes
Source: eLife. 2022 Jun 8;11:e75426. doi: 10.7554/eLife.75426 (PMC9255969; doi:10.7554/eLife.75426)
Supplement: Figure 3—source data 1. [file elife-75426-fig3-data1.xlsx]

## Sheet: length variants
time	L						DL						DDL						DDDL
0	0.0323495	0.0384959	0.0311225	0.0397494	0.0556448	0.0432721	0.013069	0.0203388	0.0129715	0.0189329	0.0260292	0.0157552	0.0110165	0.0147776	0.0141687	0.0147624	0.0114024	0.0127167	0.0114104	0.0167764	0.00940258	0.0116056	0.0143507	0.00980988
0.1	0.0466749	0.0549761	0.0468813	0.0575113	0.0815777	0.0643565	0.0184658	0.026696	0.019521	0.0301822	0.0385985	0.0230475	0.013767	0.018273	0.01703	0.0212861	0.0157962	0.0158476	0.0123939	0.0181159	0.0105504	0.0144393	0.0174553	0.0111093
0.2	0.0641051	0.0747122	0.0649706	0.0792282	0.109753	0.0890842	0.0264318	0.0334292	0.0273849	0.0452401	0.0544676	0.0323757	0.0172281	0.0225412	0.0215348	0.0305164	0.0212943	0.0205271	0.01404	0.0195841	0.0121857	0.0179386	0.0212031	0.0135148
0.3	0.0837753	0.0952056	0.0832019	0.100036	0.141877	0.115335	0.0349916	0.0419141	0.0371352	0.0623667	0.0739361	0.0446443	0.0218643	0.0275538	0.0264017	0.0409453	0.029053	0.0274049	0.0160091	0.0231233	0.0138416	0.0216562	0.0262949	0.0148702
0.4	0.103698	0.11676	0.105582	0.126021	0.172672	0.143158	0.0456518	0.0531344	0.0499812	0.0810676	0.0947955	0.0585092	0.0275153	0.033066	0.0320358	0.0537965	0.039234	0.0366659	0.0178136	0.0247306	0.0161866	0.0257742	0.0311444	0.0180011
0.5	0.12367	0.141053	0.124848	0.150676	0.203718	0.171478	0.0573706	0.0644449	0.0613791	0.106267	0.118809	0.0772216	0.0340769	0.0406905	0.0409015	0.0683408	0.050764	0.0470723	0.020712	0.0279633	0.0187723	0.0308782	0.0368222	0.021244
0.6	0.146476	0.164671	0.147372	0.175428	0.238795	0.201852	0.0718481	0.0787795	0.0770535	0.127446	0.141697	0.094139	0.0412865	0.0482712	0.0479962	0.0851166	0.0624113	0.0575319	0.0245002	0.0320821	0.0224728	0.0359822	0.0443804	0.0254474
0.7	0.171376	0.186599	0.170487	0.201639	0.270083	0.230503	0.0860131	0.0925267	0.0896033	0.150143	0.166744	0.111698	0.0506235	0.0566247	0.059032	0.103707	0.0743997	0.0700162	0.0270235	0.0364224	0.0255522	0.0430472	0.0508109	0.0287519
0.8	0.193111	0.211755	0.192357	0.228112	0.300644	0.257899	0.099553	0.107382	0.106707	0.176602	0.192149	0.131617	0.0602732	0.0670826	0.0690023	0.121557	0.0898912	0.0828141	0.0309596	0.0400002	0.029841	0.0492753	0.0583665	0.0332298
0.9	0.214428	0.236125	0.214634	0.250428	0.329585	0.289244	0.11551	0.122437	0.123116	0.19712	0.217995	0.152295	0.0687184	0.0768193	0.0800012	0.140167	0.104284	0.0977795	0.0346436	0.0445929	0.0332927	0.0566082	0.066904	0.0384554
1	0.238886	0.260765	0.236852	0.27568	0.3585	0.314079	0.132519	0.136058	0.13979	0.221008	0.240436	0.172859	0.0803976	0.0869165	0.091183	0.161019	0.120043	0.112403	0.0396966	0.0500305	0.0392539	0.0647503	0.0759624	0.0437118
1.1	0.259181	0.283175	0.259847	0.301885	0.38517	0.342164	0.14856	0.152188	0.157227	0.249	0.263097	0.192806	0.0916558	0.0958908	0.103398	0.179359	0.133574	0.128761	0.0436827	0.0546851	0.04294	0.073268	0.0835258	0.0496039
1.2	0.280668	0.306422	0.283308	0.326124	0.411069	0.364229	0.163802	0.168223	0.175045	0.272576	0.287397	0.214375	0.102149	0.110323	0.11438	0.19954	0.149175	0.143401	0.0487982	0.0601922	0.0478028	0.0816228	0.0944178	0.0541014
1.3	0.303122	0.329607	0.303931	0.346587	0.435178	0.391269	0.182007	0.185958	0.192116	0.295641	0.311327	0.234051	0.11416	0.1221	0.126494	0.219401	0.168479	0.158274	0.055514	0.0661115	0.0538833	0.0909498	0.104372	0.0610044
1.4	0.324514	0.348413	0.323446	0.371709	0.459072	0.41446	0.198548	0.201328	0.207548	0.318225	0.334799	0.256491	0.125804	0.13297	0.137445	0.239494	0.182041	0.174954	0.060642	0.0708253	0.0597211	0.100119	0.113329	0.0672381
1.5	0.346215	0.368551	0.345754	0.392769	0.482312	0.43688	0.213661	0.217259	0.225901	0.342654	0.356127	0.275758	0.139266	0.145257	0.152233	0.257007	0.197496	0.190507	0.066268	0.0786739	0.0646785	0.109427	0.124054	0.0749057
1.6	0.363302	0.390858	0.365464	0.412795	0.502728	0.460711	0.232195	0.234303	0.24435	0.362672	0.375512	0.295027	0.149312	0.158347	0.165453	0.278464	0.216089	0.20445	0.0726608	0.085116	0.0708454	0.122532	0.13455	0.0826629
1.7	0.383751	0.409886	0.384893	0.435208	0.521441	0.47729	0.247308	0.250949	0.261884	0.387582	0.394176	0.314342	0.16311	0.172818	0.179332	0.297527	0.233703	0.222547	0.0785014	0.0929749	0.0781519	0.130163	0.145898	0.0884457
1.8	0.403136	0.429539	0.405496	0.454279	0.541207	0.497036	0.26458	0.267588	0.277161	0.405087	0.416817	0.334555	0.175169	0.182596	0.192721	0.318117	0.247515	0.238856	0.0852026	0.0988556	0.0861537	0.141473	0.155212	0.0977571
1.9	0.421933	0.449208	0.424817	0.478811	0.5586	0.513877	0.279139	0.282088	0.292276	0.420954	0.435629	0.348681	0.187346	0.195934	0.205088	0.332418	0.262795	0.253522	0.0923434	0.106498	0.092337	0.152775	0.166989	0.104697
2	0.43874	0.468411	0.442349	0.495639	0.576779	0.534545	0.294752	0.300018	0.309168	0.442411	0.452766	0.367942	0.200573	0.208143	0.217965	0.35329	0.279894	0.268986	0.0988717	0.112283	0.0993165	0.166579	0.180616	0.11277
2.1	0.454208	0.486458	0.457921	0.51492	0.5955	0.550644	0.30978	0.313268	0.323759	0.464076	0.469641	0.384064	0.213079	0.222869	0.232765	0.373325	0.293924	0.283322	0.106967	0.120106	0.105465	0.175288	0.190497	0.119917
2.2	0.473576	0.504344	0.478748	0.531544	0.611317	0.569163	0.323747	0.327083	0.340455	0.480261	0.486252	0.3992	0.227121	0.234275	0.244502	0.389198	0.310238	0.300074	0.113941	0.127347	0.11459	0.1862	0.199975	0.128467
2.3	0.489416	0.51966	0.49477	0.549311	0.62541	0.584148	0.341602	0.34116	0.355449	0.499265	0.502489	0.418207	0.239907	0.246116	0.257009	0.4024	0.325475	0.313591	0.122172	0.136684	0.123126	0.199092	0.212495	0.135748
2.4	0.505787	0.533843	0.510911	0.566775	0.641438	0.599951	0.352656	0.358245	0.369379	0.512719	0.515672	0.429688	0.251069	0.258823	0.270571	0.421871	0.340013	0.326462	0.131532	0.142459	0.129861	0.209149	0.222782	0.144787
2.5	0.518023	0.549318	0.524977	0.582993	0.65552	0.616446	0.366675	0.370941	0.385127	0.526523	0.531344	0.445343	0.262715	0.271197	0.281388	0.437719	0.354853	0.34157	0.137483	0.150764	0.136647	0.224444	0.234172	0.153696
2.6	0.535101	0.566767	0.538936	0.60121	0.671564	0.629667	0.379315	0.383651	0.397434	0.546497	0.545252	0.462095	0.27512	0.283623	0.295358	0.452108	0.366646	0.352327	0.14468	0.158365	0.145225	0.234832	0.246723	0.161554
2.7	0.551804	0.583283	0.557906	0.616735	0.681899	0.641339	0.392103	0.395445	0.410881	0.560627	0.561707	0.474142	0.284434	0.295225	0.305591	0.464868	0.379997	0.366099	0.152783	0.166301	0.152949	0.246175	0.257568	0.169003
2.8	0.564781	0.594921	0.570754	0.625684	0.694853	0.655837	0.40673	0.411467	0.423754	0.572091	0.571635	0.485596	0.297321	0.309067	0.321134	0.480863	0.390014	0.383537	0.16225	0.176538	0.162154	0.259609	0.267535	0.178219
2.9	0.580667	0.610162	0.587852	0.644481	0.70718	0.668438	0.417582	0.428424	0.440062	0.585161	0.587614	0.500937	0.309013	0.316558	0.333272	0.497169	0.407193	0.394652	0.167873	0.182614	0.16931	0.270858	0.279232	0.187219
3	0.592574	0.623186	0.600881	0.655405	0.718778	0.679587	0.429432	0.440144	0.451947	0.601382	0.598417	0.515544	0.320688	0.331397	0.344392	0.506847	0.420169	0.405655	0.176596	0.191269	0.179414	0.28061	0.290926	0.194447
3.1	0.604044	0.633234	0.612388	0.67212	0.733707	0.692651	0.440497	0.449566	0.461097	0.613133	0.611932	0.528386	0.330294	0.341956	0.357224	0.519839	0.428873	0.417512	0.184168	0.200583	0.187132	0.294588	0.298667	0.20435
3.2	0.616111	0.648686	0.624985	0.682328	0.744367	0.701926	0.451868	0.464177	0.47537	0.626352	0.618162	0.537608	0.342409	0.35307	0.368966	0.536645	0.442015	0.428442	0.194178	0.207502	0.196306	0.305608	0.309418	0.212504
3.3	0.629361	0.655922	0.638709	0.692458	0.750376	0.714279	0.466058	0.477306	0.49036	0.639557	0.633794	0.550541	0.353861	0.364685	0.380193	0.544536	0.453764	0.438837	0.201832	0.215178	0.205563	0.316772	0.321771	0.219973
3.4	0.639928	0.671699	0.651187	0.708176	0.763198	0.725528	0.47726	0.483217	0.49995	0.65354	0.644285	0.561978	0.361793	0.374718	0.387565	0.557031	0.467359	0.450428	0.208351	0.222225	0.213855	0.32767	0.33116	0.230791
3.5	0.654285	0.683146	0.662653	0.719707	0.775538	0.733366	0.489137	0.496194	0.511428	0.660285	0.653432	0.569544	0.374177	0.385348	0.400355	0.569832	0.476939	0.460336	0.219162	0.232518	0.221963	0.340375	0.343097	0.238896
3.6	0.665287	0.691108	0.675604	0.723701	0.780942	0.743294	0.496965	0.507824	0.519207	0.671131	0.660893	0.580539	0.387023	0.39381	0.410472	0.584918	0.488096	0.474879	0.224838	0.238793	0.229229	0.351799	0.350902	0.246255
3.7	0.676343	0.698678	0.68261	0.740433	0.785213	0.75293	0.507921	0.52007	0.530661	0.67993	0.670348	0.59006	0.392361	0.407985	0.421413	0.590848	0.495222	0.480096	0.233598	0.248316	0.239323	0.360855	0.36394	0.258205
3.8	0.68455	0.711648	0.691891	0.747998	0.800223	0.762995	0.516298	0.528289	0.540847	0.689478	0.678065	0.599705	0.405186	0.415797	0.431931	0.600691	0.508711	0.491522	0.244295	0.25523	0.24494	0.371074	0.372322	0.2655
3.9	0.69485	0.722304	0.70326	0.762111	0.809065	0.771883	0.527212	0.540205	0.550229	0.702484	0.688196	0.607392	0.412738	0.426345	0.442041	0.615934	0.517175	0.501298	0.250357	0.267671	0.254756	0.383538	0.382088	0.271224
4	0.706	0.732847	0.713086	0.770634	0.81392	0.779173	0.536103	0.547587	0.561917	0.711775	0.698994	0.620935	0.421302	0.435793	0.451355	0.622165	0.525601	0.512494	0.257064	0.273387	0.264019	0.394454	0.392647	0.281812
4.1	0.715633	0.741558	0.725587	0.779097	0.820473	0.784908	0.547664	0.555578	0.570554	0.719332	0.708772	0.627334	0.433702	0.447354	0.46036	0.631036	0.533748	0.519882	0.265103	0.282637	0.272983	0.401632	0.399169	0.290843
4.2	0.723732	0.751352	0.73349	0.786181	0.832211	0.796919	0.5557	0.565932	0.578745	0.733299	0.716345	0.634864	0.439938	0.455122	0.470228	0.642598	0.545054	0.532201	0.276103	0.288309	0.280457	0.415284	0.412983	0.297646
4.3	0.734097	0.759494	0.744954	0.79685	0.837824	0.807099	0.566311	0.573088	0.58763	0.736682	0.723898	0.644033	0.447592	0.464656	0.476782	0.650499	0.550937	0.538132	0.28494	0.300227	0.289635	0.425337	0.420755	0.304333
4.4	0.743461	0.765331	0.755562	0.805351	0.838332	0.810691	0.574646	0.585189	0.598061	0.751839	0.727253	0.654111	0.460021	0.473115	0.487178	0.6572	0.560483	0.543649	0.287649	0.305162	0.295911	0.435747	0.429125	0.311107
4.5	0.750973	0.776935	0.765662	0.813079	0.852117	0.819717	0.583037	0.593816	0.607346	0.749461	0.735192	0.662221	0.468468	0.48016	0.496776	0.666944	0.569864	0.552605	0.299463	0.31349	0.306747	0.446935	0.439567	0.321525
4.6	0.758941	0.784158	0.769825	0.818335	0.857529	0.826186	0.587608	0.603292	0.614089	0.761194	0.742901	0.661569	0.473788	0.491053	0.504965	0.673915	0.574729	0.557942	0.308069	0.322951	0.311036	0.454219	0.449503	0.329596
4.7	0.767596	0.787993	0.778641	0.828833	0.861173	0.830409	0.59581	0.610695	0.623039	0.765881	0.749602	0.67948	0.482771	0.50029	0.513801	0.681963	0.586874	0.567455	0.314952	0.329955	0.319114	0.462521	0.45696	0.332909
4.8	0.776579	0.796949	0.78524	0.835274	0.866398	0.841236	0.603703	0.618503	0.633451	0.777536	0.758905	0.688064	0.490689	0.506948	0.52262	0.688774	0.593099	0.576977	0.323068	0.336598	0.327525	0.472939	0.465127	0.343668
4.9	0.779417	0.806593	0.792781	0.839171	0.872531	0.847649	0.6096	0.627789	0.641077	0.781491	0.765391	0.689288	0.496338	0.513738	0.529815	0.698598	0.603728	0.583252	0.328965	0.345809	0.336302	0.482362	0.47193	0.349675
5	0.792011	0.811732	0.801799	0.845692	0.881269	0.850886	0.616834	0.630996	0.646106	0.787286	0.771066	0.700181	0.508561	0.524856	0.534242	0.706505	0.606228	0.592354	0.336545	0.354296	0.344722	0.491515	0.48239	0.361123
5.1	0.795076	0.815647	0.80768	0.855243	0.88639	0.861676	0.626155	0.64227	0.65099	0.793804	0.775405	0.705508	0.513168	0.530414	0.54551	0.713769	0.617544	0.600447	0.344588	0.360494	0.351072	0.498315	0.491034	0.366074
5.2	0.808149	0.826319	0.813935	0.85753	0.890849	0.866554	0.635231	0.649047	0.6601	0.799148	0.78363	0.709101	0.520711	0.538904	0.550867	0.717034	0.617031	0.610702	0.351562	0.36748	0.358584	0.506772	0.499241	0.375234
5.3	0.811587	0.83179	0.825568	0.86639	0.896756	0.874135	0.64122	0.655623	0.66458	0.80713	0.788112	0.716821	0.525847	0.544198	0.560697	0.724311	0.628762	0.610201	0.358605	0.375766	0.364068	0.516925	0.505588	0.379121
5.4	0.821383	0.834981	0.831449	0.87143	0.897602	0.877392	0.648015	0.663523	0.67561	0.81646	0.796178	0.719756	0.534872	0.552386	0.564231	0.730976	0.634002	0.617406	0.366834	0.381402	0.374468	0.52673	0.509669	0.389315
5.5	0.8225	0.844002	0.835999	0.880127	0.899511	0.877879	0.655654	0.670141	0.67921	0.826858	0.798957	0.727995	0.541988	0.560284	0.573839	0.737386	0.641685	0.623802	0.375794	0.390175	0.380361	0.529641	0.517381	0.39256
5.6	0.832677	0.849983	0.844309	0.883022	0.907739	0.883354	0.661936	0.677363	0.689059	0.826933	0.808542	0.732899	0.550137	0.565054	0.58001	0.742565	0.648637	0.63117	0.383803	0.397813	0.391597	0.54089	0.527374	0.400486
5.7	0.836248	0.854143	0.846354	0.889686	0.912562	0.889899	0.668364	0.68065	0.697416	0.835147	0.810245	0.741773	0.555425	0.569817	0.586441	0.748072	0.653544	0.63357	0.3886	0.403812	0.395501	0.543696	0.533206	0.406949
5.8	0.843078	0.864063	0.849242	0.891573	0.920292	0.896261	0.674059	0.691773	0.700775	0.837484	0.813857	0.74326	0.56315	0.579801	0.594749	0.751787	0.657901	0.643613	0.395972	0.408672	0.405595	0.552968	0.542699	0.416333
5.9	0.849709	0.86823	0.861024	0.902565	0.921027	0.902702	0.679975	0.695039	0.704626	0.842858	0.823872	0.74857	0.567865	0.590434	0.60041	0.758112	0.664589	0.650443	0.403732	0.416815	0.412716	0.559751	0.547551	0.421962
6	0.851932	0.871242	0.865451	0.903841	0.926066	0.900109	0.686232	0.700979	0.710143	0.846706	0.825682	0.756195	0.572339	0.595176	0.606529	0.765969	0.668986	0.653565	0.408872	0.424516	0.417365	0.570594	0.554292	0.42898
6.1	0.857081	0.876489	0.872309	0.908879	0.926689	0.907298	0.692048	0.708418	0.71798	0.855234	0.829643	0.762253	0.581424	0.598932	0.611302	0.77001	0.672002	0.654621	0.415994	0.432767	0.422851	0.575389	0.561517	0.434497
6.2	0.865503	0.878572	0.874311	0.905554	0.932549	0.909527	0.69678	0.71547	0.721205	0.862578	0.833894	0.763597	0.588019	0.605858	0.616082	0.77436	0.681505	0.664619	0.423035	0.438184	0.428528	0.581098	0.565238	0.440072
6.3	0.867197	0.883915	0.882646	0.917643	0.933179	0.911381	0.703177	0.722811	0.729606	0.858043	0.840587	0.771964	0.588125	0.609892	0.619606	0.779903	0.687081	0.673538	0.431008	0.444546	0.437493	0.587937	0.572833	0.449135
6.4	0.875701	0.891297	0.887706	0.915118	0.936245	0.917805	0.709596	0.724128	0.733523	0.866373	0.845624	0.774513	0.597058	0.620772	0.628249	0.783491	0.690215	0.674048	0.436975	0.448897	0.441103	0.593814	0.580334	0.447891
6.5	0.879666	0.894723	0.887305	0.923072	0.940605	0.919138	0.71656	0.73303	0.743265	0.872935	0.848997	0.781136	0.60423	0.624203	0.635223	0.79131	0.695309	0.682113	0.442383	0.460918	0.449794	0.605569	0.5841	0.459883
6.6	0.886667	0.899926	0.896216	0.927591	0.939579	0.925509	0.719475	0.733916	0.74512	0.875935	0.855524	0.783707	0.610118	0.629504	0.641803	0.797231	0.696497	0.68894	0.451692	0.465096	0.455228	0.608654	0.593732	0.462602
6.7	0.886428	0.904305	0.895738	0.93009	0.947676	0.929805	0.725289	0.742542	0.749508	0.88034	0.855928	0.788313	0.613477	0.636539	0.646174	0.798041	0.703878	0.690948	0.456183	0.468375	0.463158	0.613459	0.595927	0.471684
6.8	0.891347	0.908576	0.9022	0.936567	0.947692	0.932445	0.73099	0.745608	0.756434	0.881895	0.858303	0.793581	0.619289	0.640516	0.65355	0.802371	0.709321	0.69318	0.462142	0.477056	0.472499	0.616669	0.602899	0.477394
6.9	0.898053	0.91366	0.906357	0.941088	0.952523	0.934574	0.736664	0.750296	0.761155	0.890432	0.868966	0.79166	0.625421	0.647731	0.656908	0.804012	0.713624	0.704976	0.4682	0.481958	0.475346	0.62562	0.609145	0.482684
7	0.901583	0.91042	0.909959	0.937849	0.952202	0.938239	0.740323	0.755841	0.759947	0.884538	0.868994	0.802005	0.630218	0.65399	0.661801	0.808467	0.720036	0.704161	0.471056	0.487555	0.482735	0.629059	0.615362	0.485938
7.1	0.905212	0.918163	0.913764	0.943776	0.959985	0.940628	0.747343	0.763685	0.770619	0.899602	0.869049	0.804556	0.633664	0.656587	0.666645	0.814587	0.721622	0.712847	0.478264	0.493472	0.482955	0.634784	0.620313	0.491429
7.2	0.907059	0.920669	0.915875	0.944463	0.956945	0.944437	0.748587	0.766392	0.769955	0.899908	0.871544	0.811756	0.644662	0.660548	0.67091	0.816286	0.726967	0.714872	0.486238	0.501186	0.492795	0.640208	0.623157	0.498453
7.3	0.91576	0.924901	0.921799	0.951183	0.962094	0.951205	0.75349	0.76795	0.777491	0.899439	0.874901	0.810795	0.645183	0.664353	0.675367	0.818598	0.727659	0.712153	0.488864	0.504051	0.498606	0.647072	0.630869	0.501239
7.4	0.914712	0.931372	0.925061	0.95223	0.962842	0.95043	0.758939	0.771093	0.780951	0.905545	0.878699	0.812422	0.650194	0.672137	0.680063	0.827563	0.733811	0.722335	0.49565	0.514117	0.504288	0.651063	0.633239	0.506756
7.5	0.925543	0.933412	0.927159	0.95265	0.964167	0.955476	0.761979	0.779238	0.783798	0.908147	0.881741	0.816698	0.655222	0.676639	0.687355	0.827554	0.737377	0.725508	0.502304	0.516955	0.508813	0.655686	0.641467	0.514734
7.6	0.92377	0.935506	0.933289	0.957787	0.965931	0.957224	0.76709	0.782553	0.79043	0.905598	0.88217	0.820062	0.658292	0.68191	0.68961	0.830098	0.747094	0.72655	0.506715	0.525157	0.516295	0.662287	0.642732	0.515566
7.7	0.931348	0.937304	0.931479	0.952451	0.968314	0.957358	0.771385	0.786824	0.795032	0.91311	0.886937	0.822576	0.665589	0.684192	0.69562	0.835675	0.745023	0.733212	0.510857	0.529662	0.522071	0.665168	0.648514	0.524259
7.8	0.927837	0.942139	0.936132	0.96365	0.970353	0.956666	0.77685	0.791769	0.800756	0.916121	0.893612	0.828253	0.667391	0.688416	0.698453	0.838285	0.748029	0.734635	0.5182	0.534968	0.525701	0.668107	0.651577	0.529395
7.9	0.932469	0.938677	0.938386	0.962377	0.971997	0.964586	0.776763	0.794837	0.800668	0.922111	0.893703	0.837842	0.676314	0.695855	0.704003	0.846985	0.752933	0.740796	0.521982	0.540612	0.533179	0.673086	0.658508	0.533044
8	0.935745	0.946173	0.942136	0.965788	0.969798	0.965443	0.782547	0.79859	0.805292	0.920554	0.894643	0.834039	0.677714	0.696654	0.706601	0.844811	0.755421	0.74822	0.529071	0.545715	0.53879	0.676296	0.660982	0.534867
8.1	0.938249	0.947133	0.946617	0.974798	0.975765	0.963849	0.786048	0.801933	0.810354	0.926566	0.896896	0.839813	0.680789	0.704629	0.714072	0.847449	0.756744	0.746584	0.531725	0.549609	0.541456	0.686299	0.666569	0.540271
8.2	0.942615	0.948362	0.951662	0.97245	0.975125	0.968481	0.788217	0.810851	0.810887	0.92009	0.900399	0.840351	0.687647	0.706818	0.714261	0.848876	0.764867	0.749068	0.536378	0.554604	0.547958	0.686802	0.672348	0.546592
8.3	0.939318	0.953645	0.951088	0.965183	0.978865	0.971203	0.790832	0.809998	0.811494	0.924592	0.902988	0.841642	0.690166	0.709185	0.717003	0.852713	0.764086	0.757248	0.543957	0.559359	0.554882	0.693988	0.678518	0.550689
8.4	0.945474	0.958897	0.952615	0.973618	0.979188	0.966286	0.79999	0.810483	0.818603	0.931875	0.907908	0.844868	0.691841	0.71375	0.725883	0.852616	0.77061	0.757248	0.547791	0.567097	0.557494	0.695124	0.68144	0.553747
8.5	0.950829	0.962359	0.955151	0.976863	0.97813	0.974623	0.798387	0.817172	0.823595	0.930278	0.909432	0.8499	0.697734	0.721673	0.728679	0.86157	0.771571	0.765257	0.551587	0.570092	0.561292	0.702473	0.683214	0.561583
8.6	0.949158	0.960149	0.95467	0.97664	0.980453	0.973981	0.807103	0.818857	0.825479	0.940489	0.91077	0.851138	0.701793	0.721717	0.73221	0.859444	0.774993	0.765056	0.554867	0.574847	0.566189	0.705732	0.690655	0.563719
8.7	0.953692	0.961718	0.957299	0.974505	0.985949	0.974043	0.805584	0.82134	0.825335	0.935026	0.91612	0.855504	0.701268	0.727391	0.731801	0.866569	0.780616	0.765854	0.559985	0.584391	0.571013	0.706768	0.693655	0.567382
8.8	0.955832	0.96272	0.959759	0.977736	0.98392	0.979134	0.810856	0.824335	0.828073	0.938172	0.912682	0.85465	0.709719	0.729068	0.737343	0.865812	0.782606	0.771791	0.565719	0.58452	0.573465	0.708522	0.691316	0.568444
8.9	0.959209	0.958859	0.962371	0.985674	0.977958	0.982119	0.81519	0.826247	0.835882	0.94891	0.917977	0.857285	0.711209	0.731389	0.742148	0.869281	0.781166	0.774535	0.571157	0.590836	0.580235	0.709309	0.700291	0.577411
9	0.960235	0.964477	0.961493	0.980214	0.984186	0.973575	0.816795	0.829057	0.83641	0.939934	0.917459	0.85929	0.715623	0.737419	0.743983	0.875534	0.787427	0.775975	0.576031	0.593169	0.585429	0.716816	0.70475	0.578433
9.1	0.964112	0.968634	0.963591	0.984362	0.986813	0.978846	0.819426	0.831878	0.836587	0.94361	0.917248	0.865252	0.719857	0.742151	0.744557	0.877111	0.791876	0.778596	0.578511	0.600827	0.587062	0.71931	0.70824	0.578951
9.2	0.962262	0.971962	0.972206	0.985765	0.988611	0.98077	0.820368	0.835329	0.839734	0.943207	0.921394	0.867616	0.720894	0.742759	0.747786	0.879166	0.788807	0.784076	0.583866	0.601896	0.59262	0.724303	0.708542	0.585753
9.3	0.964621	0.975761	0.972008	0.981943	0.9836	0.984082	0.824921	0.840151	0.842217	0.946035	0.921457	0.871813	0.726506	0.746898	0.753394	0.878956	0.791323	0.784625	0.58566	0.609101	0.599355	0.724353	0.714788	0.586761
9.4	0.969638	0.976495	0.969647	0.981744	0.989033	0.98625	0.831124	0.840566	0.845502	0.950346	0.927106	0.871248	0.730315	0.755035	0.75455	0.876432	0.797113	0.784866	0.594441	0.614523	0.600663	0.730984	0.713319	0.592785
9.5	0.974177	0.976467	0.97589	0.983699	0.989986	0.982761	0.828538	0.846179	0.848902	0.948518	0.928317	0.874972	0.73398	0.749901	0.762072	0.885287	0.803301	0.787339	0.592874	0.617333	0.603938	0.734633	0.719445	0.597829
9.6	0.974914	0.977686	0.971523	0.987118	0.99029	0.98681	0.830497	0.849131	0.855528	0.958292	0.926556	0.880671	0.736055	0.760653	0.762276	0.882417	0.805724	0.791797	0.60055	0.62156	0.607624	0.73363	0.717208	0.599856
9.7	0.975229	0.977325	0.976764	0.989582	0.988788	0.985634	0.83386	0.852966	0.85327	0.951526	0.929551	0.881752	0.741179	0.760532	0.763565	0.885533	0.801853	0.794763	0.602413	0.626856	0.613616	0.739894	0.724667	0.602416
9.8	0.977281	0.981003	0.978009	0.986566	0.991233	0.984038	0.838044	0.853484	0.856223	0.95922	0.928431	0.881609	0.740812	0.767505	0.761698	0.887516	0.806846	0.79616	0.605228	0.629288	0.615377	0.738458	0.729167	0.607633
9.9	0.980149	0.982088	0.978895	0.990828	0.991072	0.984981	0.839986	0.858339	0.861292	0.9594	0.932705	0.886322	0.747128	0.771842	0.773416	0.886969	0.804463	0.800383	0.612683	0.638386	0.623594	0.747307	0.727672	0.610724
10	0.980747	0.985313	0.976606	0.990759	0.987954	0.991187	0.845493	0.861327	0.858579	0.957406	0.927491	0.884707	0.749412	0.770081	0.773332	0.8917	0.808776	0.804783	0.611858	0.637708	0.621776	0.74974	0.729152	0.61248
10.1	0.977267	0.983844	0.979381	0.993841	0.997695	0.988056	0.841632	0.862388	0.861526	0.953763	0.935763	0.888269	0.749931	0.772837	0.775883	0.889134	0.815631	0.806533	0.616974	0.643944	0.62732	0.752464	0.734264	0.618851
10.2	0.979398	0.983079	0.977577	0.992457	0.992684	0.993089	0.846133	0.861059	0.862664	0.95916	0.930893	0.888963	0.74927	0.775954	0.777919	0.8903	0.813803	0.806662	0.622006	0.646865	0.632752	0.756612	0.736309	0.621733
10.3	0.978009	0.988594	0.982133	0.996727	0.992244	0.990862	0.849152	0.863331	0.868037	0.954677	0.937401	0.892447	0.755738	0.780209	0.783928	0.891534	0.812967	0.805738	0.627457	0.648416	0.637761	0.754458	0.738747	0.620375
10.4	0.978884	0.989233	0.983262	0.994446	0.995729	0.995046	0.850944	0.865848	0.866885	0.957232	0.940144	0.899577	0.756023	0.783532	0.784707	0.900469	0.818108	0.812072	0.626088	0.649297	0.636235	0.756629	0.742146	0.625836
10.5	0.984222	0.983422	0.979465	0.993802	0.99303	0.99254	0.853751	0.867262	0.86593	0.958859	0.936099	0.89087	0.758824	0.783745	0.795159	0.893821	0.819303	0.813867	0.631685	0.657576	0.641655	0.760879	0.743526	0.627412
10.6	0.984672	0.99025	0.983639	0.993076	0.994494	0.991845	0.858185	0.875912	0.873348	0.960052	0.939745	0.898726	0.765152	0.789636	0.78763	0.896588	0.821822	0.813909	0.633193	0.661213	0.647135	0.756598	0.747065	0.630969
10.7	0.984868	0.993056	0.984562	0.993266	0.992624	0.994452	0.855506	0.874801	0.872957	0.964021	0.943587	0.898132	0.762925	0.788415	0.789206	0.899754	0.82146	0.811604	0.638792	0.66145	0.649159	0.764782	0.753564	0.633016
10.8	0.987452	0.990766	0.984885	0.993062	1	0.99296	0.860448	0.874629	0.874259	0.965379	0.938245	0.895858	0.76559	0.790141	0.787275	0.900002	0.825505	0.818065	0.640959	0.665558	0.651539	0.768033	0.750839	0.634058
10.9	0.988908	0.991005	0.986979	0.994777	0.992028	0.994923	0.864174	0.877084	0.872721	0.959171	0.943149	0.895953	0.771897	0.792503	0.792012	0.902582	0.829406	0.820482	0.642516	0.669463	0.654851	0.768441	0.755168	0.635581
11	0.987554	0.990753	0.985831	0.994471	0.992913	0.998415	0.864236	0.874448	0.879054	0.964172	0.942821	0.899605	0.771682	0.798845	0.794626	0.905587	0.830156	0.816945	0.647848	0.66807	0.655858	0.775575	0.759861	0.643145
11.1	0.990521	0.990068	0.991871	0.991712	0.99084	0.994125	0.869585	0.87833	0.879241	0.964902	0.944449	0.900196	0.772574	0.798016	0.801474	0.904084	0.830706	0.81597	0.650321	0.676459	0.660834	0.773882	0.760012	0.643058
11.2	0.992192	0.992932	0.988841	0.996012	0.994239	0.993117	0.868618	0.880615	0.885999	0.963283	0.945566	0.901266	0.772739	0.802601	0.799643	0.901187	0.831883	0.821988	0.654007	0.675717	0.662498	0.774205	0.760244	0.644568
11.3	0.993443	0.993269	0.985757	0.995482	0.991598	0.992677	0.871465	0.886511	0.885386	0.960684	0.944636	0.904704	0.782249	0.800741	0.80249	0.907042	0.829609	0.824716	0.658183	0.682131	0.667861	0.782643	0.764724	0.647152
11.4	0.98779	0.991443	0.993076	0.99718	0.991455	0.997656	0.871467	0.885179	0.883287	0.963454	0.942738	0.900557	0.781434	0.802817	0.804473	0.901541	0.833316	0.825766	0.661236	0.683141	0.669132	0.781737	0.76339	0.651
11.5	0.989454	0.994714	0.990558	1	0.989197	0.998712	0.873767	0.884417	0.885655	0.968064	0.949715	0.902649	0.787229	0.802907	0.804091	0.914378	0.835235	0.829412	0.666047	0.688141	0.673942	0.783751	0.770308	0.653176
11.6	0.993424	0.992991	0.991943	0.991642	0.995874	0.999345	0.874467	0.884247	0.883697	0.96718	0.945741	0.909252	0.78532	0.80817	0.806191	0.904711	0.837574	0.831011	0.667562	0.68829	0.67432	0.787225	0.771975	0.654095
11.7	0.993076	0.994477	0.993276	0.991322	0.995382	0.996382	0.876664	0.889064	0.888473	0.965194	0.947975	0.9117	0.787819	0.806348	0.807522	0.907037	0.838103	0.829709	0.66906	0.693308	0.680376	0.791108	0.773884	0.65939
11.8	0.993518	0.997772	0.992821	0.989394	0.996474	0.994366	0.882608	0.89259	0.889662	0.966622	0.948431	0.90713	0.789381	0.811217	0.812319	0.905485	0.837561	0.833742	0.671223	0.699134	0.681125	0.792277	0.776887	0.660631
11.9	0.992351	0.992048	0.991062	0.9922	0.995432	0.996219	0.880714	0.890694	0.887496	0.965946	0.946324	0.908387	0.788344	0.814182	0.812876	0.905885	0.837704	0.832221	0.673548	0.699513	0.683338	0.791536	0.778741	0.666526
12	0.997295	0.995369	0.992434	0.995763	0.995122	0.995256	0.879304	0.890741	0.891699	0.962734	0.950635	0.908622	0.792763	0.816005	0.814894	0.906855	0.841897	0.834529	0.677853	0.697174	0.684953	0.789523	0.780932	0.666013
12.1	0.996376	0.998176	0.991659	0.995073	0.999349	0.993887	0.883363	0.898489	0.886165	0.967956	0.947158	0.902851	0.792036	0.816974	0.817907	0.912574	0.841923	0.83671	0.680404	0.702099	0.688999	0.794964	0.780051	0.667811
12.2	0.99378	0.995394	0.993241	0.996937	0.996132	0.992626	0.884186	0.895818	0.887605	0.965186	0.948491	0.908653	0.795443	0.822373	0.813569	0.908956	0.844616	0.837794	0.682769	0.709015	0.690138	0.795864	0.783765	0.668903
12.3	0.998016	0.994364	0.993823	0.996128	0.99563	1	0.883544	0.896472	0.893893	0.964603	0.952929	0.908379	0.793118	0.822648	0.82067	0.909401	0.843358	0.841751	0.687678	0.705798	0.691282	0.799375	0.784372	0.674308
12.4	0.997366	0.993321	0.993502	0.99243	0.993333	0.998824	0.886505	0.893523	0.888504	0.966807	0.94971	0.909353	0.799796	0.819993	0.820261	0.910279	0.846525	0.837021	0.686751	0.710128	0.693619	0.797469	0.78925	0.672488
12.5	0.995462	0.992811	0.995479	0.9903	0.995609	0.993506	0.8825	0.89946	0.896781	0.966608	0.951965	0.90907	0.801202	0.822847	0.821267	0.911232	0.848523	0.841202	0.690985	0.710728	0.699971	0.800217	0.790573	0.676008
12.6	0.996176	1	0.998052	0.990126	0.994838	0.98711	0.886215	0.900549	0.89875	0.967385	0.950705	0.910591	0.801811	0.826311	0.824599	0.908045	0.851807	0.838348	0.692929	0.714775	0.700292	0.803661	0.786755	0.677767
12.7	0.998223	0.993504	0.993991	0.986837	0.990983	0.997174	0.887455	0.899833	0.898483	0.969061	0.951955	0.907267	0.802088	0.822337	0.823449	0.909324	0.848396	0.843482	0.695902	0.711637	0.700827	0.806012	0.785122	0.680388
12.8	1	0.994403	0.992124	0.990339	0.9954	0.99709	0.889351	0.901783	0.897261	0.969583	0.955099	0.912767	0.804359	0.824511	0.82934	0.913931	0.853498	0.842714	0.694979	0.717812	0.705928	0.803653	0.791589	0.680811
12.9	0.996956	0.993197	0.993249	0.991463	0.994971	0.994746	0.888737	0.904266	0.897152	0.965904	0.954307	0.918673	0.80623	0.830126	0.826386	0.911141	0.841866	0.840312	0.699328	0.722134	0.710472	0.810041	0.792894	0.681362
13	0.996312	0.991149	0.997964	0.990637	0.99433	0.995917	0.890045	0.902028	0.899096	0.968719	0.951299	0.914156	0.806714	0.829116	0.831157	0.916228	0.846726	0.839813	0.702081	0.728272	0.707533	0.809182	0.79585	0.681463
13.1	0.999575	0.997731	0.992823	0.983614	0.992215	0.995242	0.892435	0.907278	0.902399	0.968163	0.954151	0.915164	0.808697	0.829294	0.82817	0.912022	0.849638	0.844675	0.704214	0.724766	0.709978	0.808688	0.792113	0.687047
13.2	0.998443	0.991309	0.991836	0.985392	0.995934	0.993724	0.895138	0.910832	0.902845	0.964877	0.952945	0.916617	0.815113	0.833142	0.831798	0.915563	0.851953	0.842994	0.703987	0.724607	0.712593	0.815363	0.796517	0.68791
13.3	0.997587	0.995637	0.992747	0.989027	0.993437	0.991938	0.89376	0.907836	0.900243	0.965877	0.951395	0.914161	0.812398	0.830842	0.830865	0.912751	0.850979	0.848256	0.706896	0.730196	0.717433	0.812814	0.802356	0.687756
13.4	0.999125	0.992203	0.994981	0.988718	0.988564	0.990862	0.898515	0.902005	0.902405	0.967183	0.959534	0.918194	0.813069	0.83308	0.834314	0.912	0.851646	0.844613	0.71112	0.731113	0.71827	0.813344	0.799207	0.693362
13.5	0.997445	0.992012	0.992745	0.986516	0.990249	0.990204	0.898826	0.904135	0.901212	0.969851	0.953268	0.920552	0.813417	0.82949	0.835133	0.913091	0.858662	0.843815	0.712022	0.733663	0.71992	0.811566	0.801728	0.691668
13.6	0.994245	0.996275	0.988419	0.991319	0.990168	0.990187	0.900593	0.910348	0.902765	0.967017	0.954659	0.917785	0.812859	0.835965	0.834767	0.912726	0.855626	0.844375	0.714637	0.732339	0.721615	0.819197	0.802663	0.693093
13.7	0.995745	0.989385	0.998667	0.983804	0.986097	0.997015	0.895554	0.90865	0.904137	0.967978	0.949926	0.918765	0.81603	0.83391	0.833364	0.913254	0.856204	0.843378	0.715458	0.7343	0.72332	0.81675	0.80427	0.694555
13.8	0.996902	0.991389	1	0.985726	0.987965	0.993374	0.896811	0.909024	0.905129	0.973883	0.955198	0.921989	0.815932	0.838961	0.836046	0.912467	0.857157	0.850743	0.718067	0.740391	0.719743	0.817313	0.801666	0.698596
13.9	0.995672	0.994282	0.990651	0.987138	0.986816	0.988658	0.902639	0.908048	0.904273	0.964081	0.956641	0.921017	0.81623	0.839863	0.839778	0.914447	0.858363	0.8441	0.72232	0.737244	0.725299	0.823453	0.805708	0.694606
14	0.997239	0.992172	0.993765	0.98561	0.983686	0.989647	0.900695	0.913583	0.902862	0.967233	0.953346	0.919799	0.819264	0.840746	0.838249	0.91197	0.855925	0.851317	0.720234	0.743946	0.728014	0.821476	0.803632	0.700814
14.1	0.994161	0.994006	0.990318	0.98571	0.985613	0.99487	0.903054	0.907339	0.90814	0.963686	0.950218	0.924025	0.821025	0.837495	0.837902	0.916999	0.853763	0.849895	0.719973	0.741463	0.729781	0.822826	0.805757	0.702987
14.2	0.997493	0.994186	0.989032	0.980435	0.983988	0.989308	0.899047	0.91468	0.908574	0.962524	0.952031	0.919398	0.822289	0.841444	0.840707	0.912088	0.858063	0.848038	0.726731	0.744866	0.730838	0.824041	0.80818	0.702371
14.3	0.994451	0.992767	0.995898	0.987563	0.984191	0.991851	0.905189	0.910325	0.904666	0.964794	0.952479	0.927735	0.82371	0.839837	0.837667	0.911721	0.856063	0.853871	0.726414	0.747931	0.732967	0.824196	0.810149	0.704849
14.4	0.994916	0.990117	0.99141	0.983417	0.984579	0.988737	0.901408	0.913295	0.906318	0.966067	0.95695	0.924299	0.822254	0.840416	0.842567	0.918073	0.858717	0.85004	0.728623	0.744108	0.74035	0.829899	0.808401	0.703208
14.5	0.990221	0.989349	0.986708	0.983009	0.983248	0.988678	0.902741	0.909248	0.911294	0.964885	0.949447	0.924736	0.825398	0.841867	0.839621	0.91411	0.859373	0.851645	0.732551	0.748833	0.739581	0.823754	0.810755	0.707182
14.6	0.990392	0.989184	0.989923	0.976065	0.980076	0.988485	0.902983	0.91415	0.898077	0.96222	0.950668	0.925439	0.823758	0.843544	0.842752	0.911359	0.858378	0.85076	0.731652	0.749157	0.739373	0.825179	0.814589	0.709501
14.7	0.994032	0.984743	0.987919	0.982572	0.980167	0.986628	0.903627	0.909454	0.905917	0.962374	0.95495	0.927083	0.826238	0.839677	0.845739	0.912707	0.855511	0.854434	0.726675	0.753683	0.738071	0.823762	0.813006	0.707353
14.8	0.992294	0.98795	0.988493	0.978007	0.980972	0.989395	0.902481	0.907873	0.905917	0.962908	0.953617	0.927458	0.824965	0.848927	0.845798	0.911895	0.859985	0.853174	0.731565	0.754304	0.745275	0.830667	0.812331	0.708582
14.9	0.993274	0.988118	0.987763	0.985196	0.981112	0.983956	0.903183	0.912965	0.908675	0.956934	0.954273	0.924559	0.825473	0.850048	0.846776	0.916372	0.854917	0.851074	0.735505	0.75298	0.743384	0.831272	0.812011	0.71131
15	0.991978	0.985207	0.989341	0.981064	0.9836	0.986228	0.903818	0.912926	0.90749	0.962631	0.952296	0.923142	0.822525	0.84834	0.847724	0.910227	0.859691	0.851849	0.741106	0.752148	0.742152	0.829007	0.816037	0.708521
15.1	0.990148	0.988803	0.990544	0.978482	0.978229	0.98301	0.90266	0.912118	0.905316	0.960651	0.955166	0.928259	0.831745	0.852214	0.848615	0.911456	0.856365	0.85069	0.736947	0.755908	0.744672	0.82614	0.820179	0.716989
15.2	0.990082	0.988293	0.99147	0.976714	0.977354	0.981274	0.903102	0.912087	0.907803	0.953531	0.953218	0.926822	0.825838	0.848378	0.846687	0.91358	0.861384	0.854157	0.738114	0.756037	0.747309	0.828223	0.81486	0.712775
15.3	0.986396	0.988071	0.985019	0.978976	0.97856	0.979845	0.904946	0.912648	0.903273	0.959309	0.954427	0.922669	0.82728	0.845519	0.849337	0.907305	0.861277	0.85253	0.738141	0.758304	0.743446	0.82898	0.817717	0.717832
15.4	0.991405	0.988677	0.987411	0.97503	0.974489	0.981313	0.903358	0.915505	0.904454	0.957199	0.953346	0.927486	0.827005	0.85133	0.848341	0.912003	0.861038	0.85202	0.740796	0.761606	0.747957	0.832598	0.817277	0.718516
15.5	0.986116	0.985519	0.986072	0.976764	0.97072	0.984959	0.904039	0.91033	0.904674	0.956975	0.957247	0.92373	0.828603	0.84708	0.84724	0.912867	0.858931	0.855899	0.744253	0.761887	0.752964	0.836823	0.816076	0.719078
15.6	0.985941	0.983461	0.989332	0.968208	0.974177	0.984458	0.902085	0.915688	0.909286	0.958486	0.950562	0.92424	0.832968	0.847933	0.849392	0.910818	0.858751	0.856753	0.744742	0.762837	0.752497	0.832913	0.823254	0.717003
15.7	0.985247	0.984189	0.982406	0.972903	0.977151	0.98199	0.904362	0.9173	0.907484	0.951167	0.94691	0.927119	0.829561	0.851815	0.849497	0.909721	0.856219	0.853644	0.747059	0.765995	0.748574	0.83323	0.820473	0.723047
15.8	0.985933	0.984094	0.98363	0.973022	0.971036	0.983377	0.901591	0.913527	0.907461	0.952473	0.952442	0.927169	0.834723	0.85235	0.848146	0.90955	0.859381	0.856288	0.74594	0.763842	0.75312	0.834744	0.82145	0.716771
15.9	0.986931	0.984383	0.980695	0.970561	0.972624	0.983105	0.904841	0.911329	0.903999	0.955616	0.950895	0.925156	0.828422	0.849599	0.852307	0.905678	0.864994	0.858458	0.750308	0.76861	0.754303	0.835887	0.82139	0.726827
16	0.988865	0.982407	0.983579	0.971699	0.970653	0.978118	0.906271	0.91346	0.908778	0.95402	0.951314	0.923624	0.832179	0.852379	0.847074	0.904529	0.862744	0.85197	0.750416	0.765078	0.755782	0.835539	0.821507	0.723147
16.1	0.985433	0.97784	0.981516	0.969194	0.968788	0.978574	0.902235	0.910757	0.904674	0.956801	0.949593	0.929432	0.831068	0.854429	0.850711	0.91179	0.862968	0.857593	0.750914	0.768865	0.756125	0.840519	0.81904	0.72422
16.2	0.981059	0.978314	0.982682	0.967697	0.969916	0.977521	0.902339	0.913501	0.905339	0.95041	0.946574	0.924982	0.834169	0.850666	0.85336	0.907388	0.858725	0.854815	0.75475	0.773798	0.756829	0.835478	0.823231	0.725172
16.3	0.984278	0.980622	0.977266	0.973511	0.970848	0.9753	0.903625	0.912525	0.903362	0.948662	0.948528	0.924226	0.834583	0.856348	0.849773	0.910406	0.862522	0.854795	0.750693	0.769285	0.755516	0.837486	0.823885	0.725469
16.4	0.981868	0.97639	0.976894	0.968511	0.971762	0.973385	0.901897	0.914013	0.905851	0.955202	0.950931	0.925173	0.834737	0.853314	0.851673	0.910975	0.857779	0.857825	0.754779	0.777069	0.757464	0.834545	0.821864	0.725013
16.5	0.979492	0.973616	0.977379	0.968014	0.963571	0.980117	0.903695	0.912179	0.904082	0.946394	0.948356	0.927539	0.830672	0.855176	0.851863	0.902737	0.861309	0.854426	0.753092	0.773998	0.759472	0.843864	0.825174	0.727564
16.6	0.981549	0.976457	0.976867	0.96631	0.968441	0.9756	0.903416	0.910958	0.906556	0.950926	0.946496	0.929205	0.834862	0.853947	0.851823	0.90501	0.857665	0.859032	0.754227	0.776631	0.761321	0.840174	0.826635	0.727536
16.7	0.979459	0.974002	0.975199	0.967277	0.962662	0.977389	0.902247	0.915724	0.905705	0.954152	0.944254	0.929505	0.831706	0.851274	0.851737	0.906352	0.855576	0.858187	0.752681	0.776136	0.761953	0.837166	0.825622	0.726239
16.8	0.980078	0.973564	0.97467	0.961996	0.966228	0.976166	0.900947	0.913733	0.903989	0.953796	0.946342	0.927402	0.834387	0.850424	0.852225	0.906349	0.861736	0.857968	0.756528	0.771121	0.764327	0.83629	0.828127	0.728208
16.9	0.982309	0.975511	0.974086	0.966034	0.962779	0.971889	0.903525	0.911283	0.906727	0.946239	0.949765	0.931006	0.834821	0.853576	0.853889	0.903413	0.857527	0.856901	0.759068	0.773602	0.765139	0.839174	0.826453	0.7286
17	0.979863	0.977018	0.975016	0.959345	0.961935	0.973945	0.900957	0.911754	0.903572	0.947474	0.945139	0.924081	0.83217	0.852706	0.853512	0.90873	0.859332	0.861382	0.757678	0.781216	0.763677	0.838146	0.831018	0.73184
17.1	0.977698	0.975076	0.969859	0.964529	0.958974	0.972847	0.903868	0.908107	0.901642	0.945126	0.94398	0.924635	0.834931	0.853185	0.851505	0.902087	0.86166	0.861595	0.759466	0.771394	0.769442	0.837125	0.833258	0.734554
17.2	0.980384	0.968907	0.97286	0.957834	0.959263	0.977154	0.899407	0.911674	0.903541	0.948178	0.94105	0.925733	0.834254	0.857306	0.852838	0.904427	0.859775	0.85985	0.761012	0.777605	0.765446	0.837381	0.827453	0.729392
17.3	0.977102	0.975604	0.968851	0.955669	0.963126	0.971371	0.899797	0.910508	0.900562	0.945811	0.941628	0.924159	0.834764	0.850702	0.855308	0.903049	0.859933	0.859794	0.764312	0.777854	0.770646	0.838163	0.833258	0.734506
17.4	0.978111	0.971328	0.970566	0.952597	0.960334	0.970262	0.901191	0.913029	0.903304	0.945353	0.943517	0.92736	0.833233	0.851457	0.850997	0.905402	0.862108	0.856884	0.761714	0.776036	0.770121	0.841127	0.830622	0.730048
17.5	0.976398	0.967467	0.969711	0.957254	0.959203	0.97243	0.905119	0.910662	0.899686	0.947924	0.94049	0.924615	0.834371	0.851325	0.851484	0.901889	0.858009	0.854302	0.765917	0.778838	0.770465	0.836832	0.828271	0.732789
17.6	0.973756	0.966447	0.966689	0.953641	0.957156	0.971859	0.899872	0.914905	0.904401	0.939873	0.943001	0.919477	0.834404	0.851392	0.850009	0.900107	0.858506	0.856823	0.764192	0.778457	0.770014	0.837442	0.828325	0.733167
17.7	0.976915	0.96501	0.969519	0.955801	0.955419	0.969375	0.897849	0.908962	0.902942	0.939591	0.9416	0.923924	0.835575	0.85303	0.850486	0.905979	0.858058	0.855171	0.761024	0.779397	0.77223	0.839544	0.829815	0.734503
17.8	0.970655	0.966548	0.965525	0.956398	0.954505	0.96644	0.899934	0.913527	0.901763	0.941782	0.940745	0.92244	0.835767	0.856637	0.851266	0.896757	0.858326	0.858486	0.766171	0.780446	0.774204	0.841963	0.829667	0.734447
17.9	0.97141	0.963037	0.969324	0.953865	0.953671	0.964681	0.898436	0.910065	0.901076	0.937865	0.938016	0.925397	0.833677	0.855513	0.849299	0.897638	0.854394	0.854512	0.7653	0.787241	0.775157	0.837359	0.829419	0.738586
18	0.971112	0.962962	0.9647	0.953641	0.953914	0.968098	0.894875	0.903733	0.901011	0.937291	0.936544	0.927623	0.834981	0.85335	0.851447	0.897348	0.857717	0.858968	0.766529	0.77975	0.773233	0.838271	0.829755	0.731997
18.1	0.966815	0.958588	0.967119	0.952639	0.953356	0.96721	0.898405	0.909145	0.898112	0.938605	0.936552	0.921641	0.831126	0.850099	0.852708	0.895583	0.857941	0.857388	0.769226	0.781208	0.775764	0.842886	0.82887	0.735954
18.2	0.969132	0.965164	0.958278	0.952227	0.95209	0.960164	0.898705	0.904217	0.897006	0.938128	0.938253	0.926018	0.839482	0.851377	0.85061	0.900828	0.857339	0.858531	0.77156	0.784503	0.776276	0.839599	0.827041	0.736514
18.3	0.966917	0.966004	0.963377	0.951923	0.950145	0.963922	0.896465	0.905704	0.897999	0.935432	0.939964	0.925251	0.834206	0.852278	0.849764	0.900118	0.85555	0.852731	0.766821	0.784984	0.775632	0.834059	0.829518	0.736368
18.4	0.967128	0.960943	0.957523	0.954967	0.949559	0.961155	0.895396	0.909014	0.895868	0.934592	0.936333	0.924652	0.835185	0.857152	0.852438	0.898599	0.851747	0.851415	0.766709	0.785412	0.779228	0.833567	0.830701	0.732316
18.5	0.968017	0.964209	0.958584	0.941945	0.950494	0.959173	0.896544	0.902216	0.898077	0.933109	0.933505	0.918891	0.835388	0.855086	0.853132	0.888579	0.859194	0.854868	0.768907	0.78584	0.778501	0.833614	0.831125	0.739491
18.6	0.967465	0.955577	0.95748	0.948758	0.952312	0.959061	0.898382	0.904313	0.894605	0.933322	0.934885	0.921692	0.837477	0.853808	0.84825	0.898284	0.857769	0.853972	0.772053	0.782434	0.782381	0.834923	0.830643	0.741247
18.7	0.961497	0.953246	0.957212	0.947698	0.946879	0.962906	0.895617	0.907929	0.896843	0.933071	0.932484	0.918076	0.835423	0.855367	0.851408	0.894371	0.856383	0.854389	0.770849	0.784279	0.778524	0.836785	0.832295	0.738785
18.8	0.964748	0.956909	0.956807	0.942039	0.94765	0.960111	0.8969	0.902306	0.895932	0.936418	0.933797	0.916405	0.83685	0.854421	0.850715	0.893357	0.854831	0.855507	0.768805	0.7862	0.779672	0.835912	0.831276	0.74023
18.9	0.964142	0.956564	0.955542	0.941517	0.94328	0.95663	0.896778	0.905444	0.893869	0.932985	0.933101	0.917528	0.837511	0.853664	0.848781	0.888372	0.85468	0.859172	0.771114	0.787854	0.77897	0.833896	0.836277	0.741238
19	0.963112	0.953929	0.951597	0.938931	0.944879	0.951973	0.896473	0.902268	0.894097	0.930452	0.928895	0.916727	0.835663	0.852981	0.851081	0.892048	0.850966	0.855395	0.775294	0.787674	0.783584	0.833324	0.834613	0.739152
19.1	0.961091	0.952875	0.954869	0.936343	0.94092	0.955146	0.892941	0.905565	0.892783	0.929278	0.937828	0.920779	0.835744	0.853677	0.848991	0.887786	0.857686	0.852449	0.770243	0.78697	0.781165	0.835299	0.830448	0.742426
19.2	0.962931	0.953941	0.947606	0.940597	0.945035	0.954191	0.893377	0.904485	0.893902	0.929963	0.928062	0.916071	0.835202	0.854808	0.849606	0.889452	0.852386	0.853502	0.772489	0.788825	0.786734	0.838992	0.84016	0.742216
19.3	0.960889	0.949763	0.955244	0.936241	0.937235	0.95351	0.896398	0.898409	0.891248	0.928425	0.928733	0.918152	0.833743	0.847575	0.847004	0.887181	0.852268	0.852339	0.773268	0.7889	0.785534	0.833208	0.833274	0.739225
19.4	0.963519	0.949336	0.94919	0.939752	0.933856	0.947584	0.89559	0.903581	0.890892	0.927798	0.929731	0.915069	0.836254	0.853296	0.846315	0.891338	0.849773	0.856935	0.776642	0.79009	0.782659	0.833368	0.832555	0.742644
19.5	0.9557	0.947955	0.949161	0.934866	0.935789	0.951502	0.894371	0.895622	0.887611	0.928331	0.928189	0.916693	0.834421	0.849254	0.850519	0.886527	0.8513	0.849911	0.776723	0.794121	0.785421	0.832369	0.836582	0.743364
19.6	0.956646	0.94328	0.948478	0.931698	0.936539	0.951869	0.891964	0.898824	0.891627	0.926475	0.927843	0.915615	0.833571	0.850843	0.847565	0.889457	0.853183	0.851648	0.776194	0.786862	0.787153	0.833628	0.831722	0.739958
19.7	0.954517	0.945812	0.948256	0.934026	0.935789	0.948024	0.891893	0.899465	0.887229	0.924042	0.925994	0.915032	0.835367	0.85073	0.851821	0.884837	0.851396	0.850875	0.773547	0.788665	0.783963	0.829397	0.834527	0.742669
19.8	0.959495	0.943151	0.943513	0.933303	0.933541	0.952838	0.893131	0.898198	0.889082	0.919319	0.930075	0.915704	0.832706	0.852608	0.848816	0.888325	0.852281	0.849797	0.776958	0.789927	0.785843	0.833893	0.829753	0.741773
19.9	0.953506	0.945413	0.945483	0.935573	0.935289	0.948553	0.890024	0.899076	0.885334	0.918673	0.925043	0.912056	0.830999	0.84801	0.846072	0.887775	0.847554	0.848085	0.773341	0.789976	0.786522	0.832623	0.831787	0.74461
20	0.95379	0.941979	0.946215	0.935791	0.933018	0.945638	0.891495	0.895583	0.886778	0.916817	0.927103	0.90657	0.835433	0.849666	0.844904	0.885494	0.849526	0.849668	0.774114	0.790327	0.784847	0.832415	0.828953	0.745145
20.1	0.955655	0.939398	0.93982	0.931726	0.928254	0.947598	0.886686	0.900294	0.884701	0.91854	0.920941	0.908488	0.834477	0.848834	0.845716	0.882111	0.8502	0.847495	0.776183	0.79171	0.788375	0.836255	0.829484	0.745867
20.2	0.950568	0.938082	0.941242	0.933234	0.932304	0.948055	0.888968	0.895697	0.881438	0.917781	0.925173	0.912109	0.834419	0.848729	0.840858	0.883381	0.846163	0.856106	0.775704	0.789572	0.78789	0.830913	0.83099	0.73965
20.3	0.952169	0.938494	0.938905	0.929154	0.927199	0.948682	0.88923	0.897028	0.884795	0.918656	0.923504	0.907894	0.83201	0.847235	0.844564	0.880964	0.846937	0.847189	0.775458	0.792534	0.78544	0.832206	0.832873	0.7441
20.4	0.949041	0.937034	0.940098	0.927271	0.92945	0.94461	0.889643	0.892721	0.879809	0.915831	0.922556	0.907617	0.834681	0.851238	0.84563	0.882409	0.845559	0.847523	0.776617	0.791486	0.788108	0.829584	0.833401	0.741504
20.5	0.949189	0.938054	0.938971	0.929102	0.927913	0.94041	0.886747	0.892461	0.882298	0.919532	0.919587	0.907676	0.834542	0.850795	0.842376	0.877504	0.845679	0.852073	0.776865	0.792145	0.792185	0.831026	0.832352	0.745881
20.6	0.951112	0.937466	0.93215	0.927577	0.925652	0.94193	0.885961	0.895818	0.883329	0.911058	0.920019	0.906119	0.834233	0.848839	0.844073	0.878981	0.845385	0.850558	0.776813	0.7895	0.786129	0.830742	0.83393	0.749116
20.7	0.945459	0.935519	0.937185	0.923213	0.928262	0.945941	0.886634	0.898126	0.880628	0.910757	0.913726	0.90932	0.831016	0.847706	0.842791	0.874098	0.848062	0.847455	0.775089	0.792063	0.788437	0.827137	0.830576	0.745002
20.8	0.945592	0.933597	0.936967	0.923216	0.920347	0.936346	0.884415	0.893407	0.879005	0.909133	0.920298	0.903212	0.83126	0.847956	0.843733	0.87857	0.844804	0.848436	0.77691	0.787694	0.787589	0.830239	0.830649	0.743943
20.9	0.947189	0.9291	0.929875	0.923387	0.922345	0.943308	0.885861	0.892034	0.879778	0.911373	0.920449	0.906721	0.831862	0.846562	0.843157	0.876772	0.848669	0.846612	0.779023	0.791651	0.789788	0.831753	0.832175	0.741123
21	0.949306	0.927637	0.928066	0.921404	0.918969	0.937621	0.881337	0.888425	0.877408	0.911478	0.919073	0.904581	0.83196	0.848327	0.847491	0.876747	0.844708	0.845193	0.77939	0.792068	0.785205	0.825464	0.82999	0.746341
21.1	0.947084	0.934427	0.929926	0.918803	0.920337	0.938363	0.884967	0.892412	0.879515	0.911704	0.916857	0.907065	0.82873	0.84573	0.84023	0.874891	0.842853	0.848099	0.783705	0.791164	0.783051	0.828665	0.827411	0.745982
21.2	0.941973	0.928345	0.927381	0.919048	0.916245	0.937528	0.878343	0.884726	0.874008	0.910387	0.915539	0.902383	0.832041	0.846534	0.844568	0.868271	0.841567	0.846271	0.778002	0.791828	0.788869	0.827229	0.832448	0.748595
21.3	0.937987	0.923031	0.924962	0.918667	0.912812	0.938377	0.881842	0.888804	0.87509	0.906943	0.915599	0.90781	0.829895	0.848569	0.84159	0.87172	0.843911	0.84538	0.777767	0.786252	0.790654	0.826204	0.827343	0.74571
21.4	0.937589	0.928492	0.925748	0.916819	0.917589	0.934593	0.880598	0.88663	0.88188	0.901331	0.915195	0.902599	0.828943	0.842408	0.841024	0.869701	0.839142	0.844033	0.779563	0.792841	0.787686	0.829825	0.830719	0.751303
21.5	0.940487	0.926352	0.926956	0.912315	0.918685	0.932591	0.878481	0.881323	0.875537	0.903526	0.914042	0.900218	0.828805	0.848675	0.840331	0.867699	0.842556	0.843874	0.777713	0.789162	0.791703	0.824329	0.827854	0.744613
21.6	0.938654	0.92527	0.926433	0.910716	0.912763	0.933896	0.878739	0.887536	0.870112	0.904628	0.911711	0.900453	0.827494	0.842786	0.840142	0.872552	0.840801	0.846638	0.779321	0.790893	0.787359	0.821661	0.830341	0.747279
21.7	0.932984	0.919108	0.924991	0.912972	0.910794	0.931216	0.881931	0.886733	0.86996	0.904971	0.908721	0.901352	0.826876	0.841612	0.838903	0.866481	0.839027	0.844971	0.77814	0.790981	0.78811	0.823807	0.826403	0.746167
21.8	0.93409	0.918467	0.919678	0.911053	0.908984	0.926957	0.879589	0.883902	0.870369	0.899737	0.907517	0.900582	0.82638	0.844229	0.837276	0.869442	0.840733	0.845201	0.780411	0.792377	0.789128	0.823354	0.828474	0.740829
21.9	0.93557	0.923065	0.918259	0.911177	0.905918	0.93384	0.875649	0.883299	0.868646	0.899917	0.911307	0.897899	0.826192	0.841635	0.834863	0.86639	0.840939	0.84354	0.774777	0.794847	0.78789	0.824326	0.828536	0.743621
22	0.934876	0.916138	0.920468	0.912649	0.909351	0.927996	0.880525	0.88061	0.870139	0.899306	0.908611	0.893732	0.824217	0.841877	0.834724	0.867956	0.83859	0.840564	0.777417	0.791391	0.78963	0.823061	0.826656	0.744638
22.1	0.935464	0.912179	0.915681	0.909975	0.908919	0.927203	0.877324	0.880079	0.869312	0.902099	0.906132	0.8963	0.82364	0.84214	0.835269	0.867365	0.838066	0.841356	0.778017	0.793227	0.786036	0.825386	0.826145	0.746836
22.2	0.932321	0.919961	0.914087	0.907023	0.907442	0.927842	0.87507	0.882513	0.867016	0.89489	0.905921	0.896552	0.830628	0.840391	0.835982	0.862465	0.836308	0.84081	0.780582	0.792797	0.790942	0.822235	0.824299	0.74468
22.3	0.930102	0.917326	0.917362	0.909945	0.901342	0.925125	0.871934	0.878804	0.86742	0.894039	0.906827	0.895595	0.827405	0.837439	0.836721	0.86294	0.835042	0.841656	0.780442	0.7912	0.789241	0.821376	0.824124	0.742538
22.4	0.932034	0.913604	0.914768	0.906308	0.907192	0.926388	0.870487	0.884149	0.868164	0.89418	0.903228	0.89704	0.826342	0.838631	0.83178	0.861352	0.835902	0.836052	0.781995	0.793369	0.790035	0.819854	0.825023	0.744327
22.5	0.929448	0.910889	0.910228	0.902049	0.906892	0.922047	0.868998	0.878155	0.863783	0.892617	0.903983	0.894855	0.82673	0.834853	0.831552	0.861675	0.834883	0.84027	0.778921	0.790061	0.785158	0.822232	0.825072	0.745274
22.6	0.930079	0.911242	0.911726	0.902913	0.900024	0.928225	0.873565	0.878766	0.860097	0.8931	0.902467	0.891971	0.821493	0.836032	0.834847	0.865404	0.832995	0.837772	0.779544	0.791349	0.784216	0.821213	0.826197	0.745853
22.7	0.929717	0.91414	0.911577	0.901425	0.902457	0.925912	0.871106	0.871685	0.861777	0.894128	0.903673	0.896499	0.823852	0.841632	0.830677	0.861206	0.834597	0.836495	0.780703	0.792006	0.788042	0.82176	0.826638	0.743131
22.8	0.928423	0.910685	0.908319	0.894536	0.902235	0.925024	0.871673	0.874335	0.860434	0.892103	0.900313	0.889798	0.8238	0.834726	0.830361	0.858698	0.831935	0.837477	0.779021	0.792485	0.786131	0.817822	0.823343	0.744232
22.9	0.925439	0.907919	0.909391	0.901372	0.896714	0.919219	0.87079	0.875968	0.861927	0.892678	0.900472	0.890498	0.822706	0.832947	0.832451	0.858286	0.833388	0.837094	0.779832	0.791661	0.789307	0.817457	0.822705	0.745212
23	0.92567	0.908576	0.905904	0.899944	0.901241	0.91748	0.868614	0.874237	0.863838	0.890258	0.903837	0.892786	0.82107	0.836372	0.82709	0.858121	0.832568	0.840656	0.779784	0.789041	0.785421	0.822354	0.819408	0.74853
23.1	0.923703	0.908547	0.905518	0.89758	0.897144	0.920866	0.870494	0.875463	0.861249	0.889648	0.898271	0.891055	0.81907	0.841125	0.827765	0.85384	0.831589	0.835845	0.78328	0.787542	0.784255	0.818134	0.819077	0.74713
23.2	0.922978	0.898749	0.905349	0.901648	0.89567	0.91776	0.867297	0.872586	0.859072	0.887532	0.899787	0.887823	0.820333	0.835025	0.825922	0.855604	0.829422	0.837618	0.777023	0.789608	0.784627	0.816305	0.82551	0.744781
23.3	0.920146	0.904493	0.900815	0.888767	0.894599	0.914786	0.868806	0.869194	0.858854	0.88806	0.895607	0.886247	0.817701	0.837519	0.826257	0.85355	0.827935	0.833588	0.780317	0.789708	0.784341	0.816305	0.822538	0.743215
23.4	0.919042	0.902553	0.90215	0.893456	0.892226	0.918525	0.863615	0.866935	0.857729	0.884066	0.899959	0.882589	0.817503	0.832086	0.824677	0.85084	0.829875	0.832151	0.778094	0.788269	0.788486	0.813538	0.821861	0.744419
23.5	0.916558	0.904836	0.901595	0.889399	0.89101	0.913621	0.861492	0.873786	0.858575	0.886102	0.896823	0.880036	0.819628	0.832818	0.82925	0.851683	0.831216	0.834601	0.780847	0.786208	0.785407	0.817808	0.821145	0.74156
23.6	0.91824	0.89836	0.897878	0.895072	0.891495	0.916265	0.865009	0.870064	0.856892	0.883177	0.893833	0.883189	0.820218	0.827862	0.823749	0.855279	0.831972	0.835632	0.777809	0.78865	0.783677	0.815971	0.817472	0.741991
23.7	0.920407	0.894048	0.898151	0.895282	0.886624	0.918469	0.866118	0.871164	0.847934	0.882655	0.892328	0.881461	0.821981	0.828758	0.827193	0.850644	0.828021	0.831146	0.776917	0.78933	0.785341	0.817871	0.822608	0.744798
23.8	0.915039	0.89453	0.898522	0.890407	0.890174	0.911339	0.864505	0.864562	0.853899	0.880373	0.894776	0.882704	0.819426	0.825992	0.825695	0.846178	0.826859	0.830485	0.777423	0.785804	0.778921	0.812292	0.818809	0.742868
23.9	0.915245	0.894012	0.901529	0.888891	0.888867	0.914836	0.864245	0.863854	0.850651	0.876628	0.892232	0.881948	0.818018	0.825842	0.821271	0.848459	0.822965	0.827973	0.77461	0.78593	0.785238	0.811033	0.821285	0.744994
24	0.911372	0.891678	0.895475	0.882865	0.890502	0.909695	0.859365	0.865958	0.852031	0.878114	0.88977	0.885676	0.819112	0.8283	0.820386	0.846584	0.818999	0.83065	0.77676	0.784	0.786766	0.81498	0.821265	0.745747
24.1	0.910959	0.895148	0.894521	0.889106	0.891849	0.912467	0.854983	0.86857	0.848654	0.876581	0.889661	0.876975	0.813915	0.825819	0.820991	0.848934	0.822731	0.829233	0.778786	0.783581	0.785761	0.809972	0.817592	0.740869
24.2	0.908938	0.88996	0.891474	0.890962	0.879162	0.908376	0.861701	0.865863	0.850225	0.879487	0.893609	0.878655	0.814382	0.82805	0.822344	0.84301	0.819027	0.823615	0.778707	0.788851	0.783996	0.809732	0.820048	0.74305
24.3	0.908823	0.888822	0.890575	0.885527	0.88471	0.908398	0.857719	0.862193	0.848263	0.874339	0.887848	0.87439	0.815363	0.82671	0.819942	0.844444	0.824971	0.828474	0.777738	0.787014	0.780885	0.811317	0.814725	0.739457
24.4	0.903354	0.893231	0.889218	0.882204	0.884564	0.906208	0.859994	0.860902	0.843075	0.871836	0.8877	0.877574	0.811856	0.824706	0.816472	0.842988	0.82426	0.828567	0.7762	0.785002	0.780458	0.813706	0.818702	0.740026
24.5	0.904577	0.888471	0.889514	0.881837	0.883668	0.906931	0.858694	0.859794	0.845558	0.874546	0.883569	0.877871	0.809927	0.825281	0.817739	0.842259	0.819658	0.8241	0.775002	0.787058	0.781056	0.806141	0.812131	0.737869
24.6	0.904619	0.885455	0.888383	0.881282	0.880204	0.910678	0.85602	0.859243	0.844338	0.867249	0.889734	0.873244	0.814575	0.824506	0.817683	0.841988	0.823372	0.827525	0.770889	0.783838	0.781799	0.809196	0.8179	0.739939
24.7	0.905746	0.881759	0.889993	0.880721	0.879371	0.903833	0.854372	0.856709	0.845875	0.865879	0.881986	0.873359	0.811931	0.822757	0.814995	0.843159	0.823411	0.824817	0.777173	0.781115	0.778724	0.811281	0.815675	0.747077
24.8	0.902347	0.882416	0.885556	0.876783	0.87518	0.90529	0.851628	0.853548	0.845525	0.870284	0.883113	0.870164	0.812381	0.818836	0.813401	0.837555	0.818225	0.825097	0.775802	0.783887	0.779497	0.806451	0.816149	0.746553
24.9	0.903493	0.882913	0.885772	0.875601	0.877904	0.906007	0.853647	0.858004	0.843711	0.86869	0.883163	0.868383	0.807037	0.81889	0.816025	0.840779	0.81685	0.825044	0.773606	0.779433	0.7788	0.805387	0.812706	0.741952
25	0.902018	0.880272	0.882565	0.879092	0.875701	0.906233	0.850701	0.855189	0.840596	0.866903	0.886356	0.869537	0.810133	0.819045	0.813664	0.838058	0.816306	0.827738	0.773404	0.782633	0.779919	0.80826	0.811381	0.744053
25.1	0.895234	0.877163	0.881451	0.87646	0.874084	0.898277	0.851663	0.854076	0.84066	0.868144	0.883996	0.869184	0.811039	0.819289	0.812389	0.839177	0.821168	0.826531	0.772876	0.780577	0.779217	0.807851	0.809393	0.742829
25.2	0.899013	0.876149	0.880515	0.872251	0.871075	0.901212	0.849027	0.852242	0.839436	0.863161	0.877592	0.869055	0.809266	0.820387	0.811989	0.836846	0.818509	0.823095	0.775533	0.785178	0.777216	0.803893	0.810102	0.74221
25.3	0.89913	0.879538	0.875944	0.870419	0.876269	0.897919	0.848646	0.851688	0.835012	0.867384	0.8768	0.871651	0.807297	0.819514	0.809492	0.834418	0.814071	0.825354	0.772143	0.78253	0.778152	0.802045	0.815269	0.746066
25.4	0.900862	0.877805	0.872972	0.873162	0.873039	0.900087	0.849025	0.855513	0.838225	0.865086	0.87961	0.868419	0.807783	0.816335	0.810805	0.836451	0.816834	0.821955	0.77455	0.780005	0.777956	0.804597	0.813639	0.739348
25.5	0.899964	0.877096	0.871089	0.871226	0.869211	0.894693	0.845537	0.84886	0.834927	0.86112	0.877415	0.864751	0.803503	0.814133	0.808256	0.834785	0.815066	0.821117	0.774731	0.781535	0.778617	0.802587	0.809552	0.739757
25.6	0.896511	0.876182	0.874535	0.868481	0.872651	0.895883	0.84704	0.850849	0.832115	0.862885	0.878092	0.865235	0.806807	0.812955	0.809418	0.837028	0.814722	0.818409	0.770749	0.780827	0.780291	0.802402	0.807698	0.738936
25.7	0.894275	0.873014	0.872036	0.870049	0.86422	0.896264	0.845856	0.847675	0.83503	0.86149	0.874854	0.868419	0.80457	0.810799	0.807269	0.831529	0.81224	0.821938	0.770686	0.77941	0.775636	0.804399	0.809044	0.737206
25.8	0.892748	0.867195	0.870991	0.86911	0.871883	0.889481	0.842503	0.847405	0.833814	0.86141	0.874935	0.861385	0.804653	0.812234	0.806152	0.830601	0.815589	0.816631	0.772581	0.775585	0.777751	0.798626	0.807052	0.739118
25.9	0.894373	0.870041	0.873007	0.866619	0.863728	0.89238	0.842024	0.848172	0.831074	0.857013	0.870721	0.864779	0.80503	0.810856	0.805039	0.830222	0.806489	0.819812	0.770247	0.783297	0.779781	0.800336	0.807917	0.738603
26	0.889164	0.869186	0.872219	0.868135	0.868205	0.889924	0.842728	0.841189	0.832646	0.851503	0.874485	0.863169	0.80986	0.811665	0.80574	0.827604	0.809781	0.820003	0.771941	0.779562	0.77591	0.798557	0.811091	0.737847
26.1	0.891591	0.872153	0.866595	0.864327	0.866971	0.8921	0.844906	0.846851	0.827306	0.85442	0.866088	0.85985	0.802873	0.810998	0.806954	0.827784	0.810151	0.815032	0.771668	0.777326	0.777216	0.797748	0.809461	0.738872
26.2	0.889051	0.864694	0.868417	0.86207	0.863666	0.890859	0.842364	0.845602	0.826759	0.858137	0.867364	0.858971	0.802823	0.808484	0.802011	0.827102	0.808755	0.81364	0.768972	0.776852	0.776086	0.795514	0.806672	0.737164
26.3	0.88697	0.869871	0.864696	0.861587	0.860902	0.892475	0.838178	0.844084	0.829075	0.857576	0.87138	0.860416	0.800954	0.810336	0.802893	0.826999	0.811089	0.819852	0.769157	0.777133	0.773692	0.79418	0.811552	0.739017
26.4	0.890756	0.864094	0.865618	0.86025	0.859511	0.887025	0.83823	0.840391	0.826728	0.856251	0.869718	0.858587	0.799579	0.808579	0.803916	0.826182	0.806383	0.818342	0.767098	0.776275	0.772567	0.795445	0.806672	0.738765
26.5	0.88739	0.863347	0.862711	0.861258	0.861043	0.887636	0.838459	0.838977	0.822235	0.852729	0.865366	0.860167	0.799919	0.806681	0.799586	0.822986	0.805257	0.815228	0.770307	0.773754	0.774346	0.799516	0.804838	0.734167
26.6	0.883071	0.864472	0.859819	0.860117	0.859506	0.884942	0.836852	0.839932	0.823482	0.84791	0.864736	0.856478	0.798043	0.80598	0.800995	0.823928	0.803846	0.815108	0.767494	0.777836	0.775358	0.792707	0.805859	0.736161
26.7	0.887447	0.86396	0.863304	0.856737	0.859428	0.886244	0.837548	0.84139	0.824027	0.850335	0.864996	0.856627	0.795066	0.806864	0.797459	0.82371	0.806922	0.812206	0.768501	0.775255	0.769987	0.793155	0.809386	0.737035
26.8	0.876659	0.858244	0.863509	0.855961	0.857774	0.88497	0.832762	0.837256	0.827244	0.848553	0.864827	0.856876	0.795026	0.809934	0.800355	0.821337	0.802895	0.81473	0.768903	0.776283	0.771835	0.791625	0.805903	0.736374
26.9	0.883127	0.859653	0.859198	0.854301	0.852982	0.883105	0.834014	0.835095	0.821779	0.850056	0.867656	0.854081	0.796781	0.802541	0.797335	0.821056	0.805367	0.810403	0.765867	0.773707	0.771193	0.790012	0.798488	0.735713
27	0.878695	0.859411	0.859105	0.855698	0.85319	0.877804	0.834946	0.837101	0.821999	0.845267	0.861785	0.85391	0.797087	0.805568	0.795418	0.822914	0.800666	0.808325	0.764783	0.777824	0.771185	0.78962	0.802189	0.734724
27.1	0.879618	0.855166	0.855226	0.854398	0.850979	0.881189	0.835156	0.83393	0.8195	0.848191	0.863353	0.851222	0.79622	0.806008	0.7957	0.815565	0.800496	0.810112	0.764415	0.770454	0.769862	0.788752	0.800681	0.737038
27.2	0.87806	0.852204	0.856005	0.854152	0.853959	0.878834	0.83021	0.834368	0.821151	0.843132	0.860556	0.851163	0.792086	0.802639	0.795533	0.818821	0.800978	0.813159	0.765227	0.772224	0.768453	0.792633	0.802033	0.73492
27.3	0.874549	0.849674	0.853064	0.854414	0.850273	0.879727	0.829072	0.833214	0.8169	0.843579	0.864608	0.853283	0.793259	0.803051	0.795319	0.820048	0.799046	0.808961	0.764139	0.770673	0.770331	0.787507	0.803557	0.730557
27.4	0.874703	0.854388	0.850585	0.851992	0.848286	0.880716	0.828315	0.82925	0.813687	0.843016	0.859207	0.852261	0.791267	0.800099	0.795398	0.817073	0.800163	0.808535	0.76172	0.77134	0.768237	0.786836	0.803354	0.736211
27.5	0.873665	0.853319	0.852064	0.851191	0.845637	0.872788	0.82839	0.830162	0.815795	0.840193	0.859256	0.846943	0.79234	0.799504	0.791142	0.814899	0.794686	0.803315	0.763587	0.774843	0.768231	0.788305	0.800486	0.730725
27.6	0.87398	0.845496	0.850396	0.848899	0.84989	0.875684	0.824827	0.828941	0.811658	0.834882	0.856847	0.84724	0.788652	0.798685	0.790037	0.814347	0.794123	0.804869	0.759226	0.773846	0.766357	0.784587	0.80095	0.7289
27.7	0.874282	0.850163	0.846411	0.84309	0.846437	0.876888	0.827519	0.829	0.815826	0.835354	0.855823	0.844694	0.787896	0.798332	0.789949	0.813425	0.798369	0.803945	0.765356	0.770807	0.76646	0.787827	0.798329	0.730801
27.8	0.868102	0.844448	0.851322	0.843549	0.845632	0.873936	0.828057	0.822782	0.811745	0.839066	0.854737	0.848217	0.787144	0.793727	0.789743	0.807804	0.796071	0.803774	0.758455	0.76862	0.765046	0.785767	0.797413	0.72872
27.9	0.86857	0.849841	0.847596	0.847415	0.845715	0.876123	0.8247	0.827246	0.81079	0.838467	0.857084	0.849662	0.79025	0.792995	0.78589	0.815731	0.792886	0.805191	0.762912	0.768131	0.767863	0.781292	0.795103	0.733111
28	0.865895	0.842704	0.84851	0.84164	0.843431	0.872768	0.822135	0.826553	0.809782	0.83663	0.852516	0.843095	0.788633	0.790257	0.786503	0.813342	0.791131	0.802481	0.757307	0.772069	0.762992	0.784634	0.795728	0.732047
28.1	0.866937	0.842598	0.843225	0.839022	0.84314	0.867274	0.824406	0.826566	0.807166	0.836393	0.85262	0.845655	0.787862	0.792395	0.789334	0.807431	0.792706	0.799579	0.761843	0.769112	0.763125	0.782254	0.791657	0.728793
28.2	0.865657	0.841908	0.844556	0.84058	0.841908	0.873802	0.817989	0.82484	0.806407	0.834271	0.853448	0.842955	0.787756	0.792812	0.789753	0.807928	0.79237	0.801688	0.762379	0.765776	0.765483	0.779536	0.796683	0.728684
28.3	0.863063	0.838214	0.845416	0.842176	0.837347	0.871911	0.821022	0.822563	0.807699	0.832269	0.852021	0.844697	0.786312	0.793675	0.784171	0.807	0.791029	0.801075	0.757642	0.767767	0.759151	0.781163	0.794084	0.727695
28.4	0.865943	0.841315	0.838901	0.842474	0.841142	0.866781	0.823012	0.820897	0.79987	0.828488	0.849018	0.842723	0.786248	0.792217	0.784888	0.804075	0.78905	0.800109	0.758891	0.767036	0.761733	0.780312	0.794714	0.728468
28.5	0.86492	0.83953	0.837494	0.841651	0.839874	0.868131	0.819641	0.81853	0.798882	0.829927	0.848026	0.843907	0.783678	0.792686	0.788038	0.80302	0.791613	0.798378	0.758918	0.76921	0.758976	0.779238	0.792839	0.73212
28.6	0.862023	0.843574	0.83913	0.838417	0.836886	0.864625	0.817803	0.822035	0.799629	0.831098	0.848643	0.843664	0.780955	0.794067	0.780281	0.803841	0.792675	0.798725	0.757024	0.771059	0.75924	0.782375	0.792269	0.724492
28.7	0.861413	0.836761	0.841074	0.836224	0.836188	0.866607	0.820099	0.817249	0.801764	0.825955	0.84833	0.838326	0.779471	0.786156	0.781988	0.805487	0.790209	0.801075	0.756707	0.760607	0.755718	0.775434	0.795743	0.73135
28.8	0.858477	0.831545	0.836877	0.83905	0.832453	0.862558	0.814994	0.8165	0.801542	0.826718	0.846817	0.837791	0.782189	0.784402	0.779505	0.802496	0.788711	0.795309	0.754031	0.769001	0.761478	0.777895	0.793329	0.72925
28.9	0.857783	0.829121	0.838469	0.833763	0.829711	0.864594	0.813365	0.814138	0.801114	0.829974	0.847674	0.839578	0.78098	0.790455	0.782037	0.802131	0.78188	0.80166	0.757638	0.766379	0.759511	0.775271	0.788599	0.728009
29	0.857062	0.831172	0.83403	0.833722	0.836556	0.864692	0.812931	0.815449	0.801316	0.826237	0.842632	0.839029	0.780519	0.786643	0.780314	0.80017	0.788078	0.791853	0.752937	0.763262	0.757372	0.776423	0.789344	0.726799
29.1	0.855906	0.828714	0.836334	0.829543	0.828336	0.863762	0.813609	0.815034	0.797448	0.82065	0.846104	0.834968	0.776992	0.786437	0.779038	0.798369	0.782549	0.796505	0.754884	0.765936	0.758822	0.777511	0.790065	0.729434
29.2	0.85596	0.832511	0.83329	0.831109	0.832743	0.865398	0.817203	0.814352	0.801861	0.826704	0.839759	0.838488	0.775614	0.784688	0.773669	0.797753	0.782648	0.791397	0.756899	0.762247	0.754091	0.772592	0.787987	0.725508
29.3	0.851424	0.830809	0.83098	0.835967	0.829727	0.86423	0.807747	0.808973	0.801929	0.826298	0.843681	0.83946	0.775879	0.783501	0.773474	0.798543	0.783218	0.799921	0.754969	0.762052	0.755272	0.771275	0.791667	0.727054
29.4	0.853349	0.829768	0.827473	0.828333	0.82862	0.861135	0.812683	0.809875	0.795601	0.827737	0.841587	0.83722	0.776975	0.785054	0.777039	0.798665	0.782997	0.792923	0.752627	0.76071	0.753908	0.772893	0.787182	0.724648
29.5	0.850086	0.829191	0.829894	0.832799	0.829661	0.857537	0.807628	0.808422	0.79469	0.821343	0.838574	0.836783	0.777015	0.783836	0.774605	0.793729	0.779147	0.795793	0.757497	0.760341	0.753046	0.777702	0.784127	0.726838
29.6	0.85083	0.821064	0.827974	0.826886	0.829185	0.857464	0.806218	0.808301	0.790403	0.819785	0.837983	0.834722	0.775221	0.781054	0.769056	0.792973	0.776902	0.79355	0.756517	0.760022	0.749794	0.768883	0.783328	0.722912
29.7	0.847188	0.825072	0.822435	0.821539	0.826135	0.854535	0.807524	0.809555	0.79172	0.816073	0.834191	0.830395	0.776304	0.777007	0.770084	0.792492	0.780632	0.789372	0.753959	0.753075	0.755708	0.773534	0.78631	0.720784
29.8	0.850659	0.824145	0.822059	0.828728	0.821476	0.856697	0.804665	0.805596	0.790819	0.815667	0.834284	0.836702	0.773022	0.778109	0.771425	0.792749	0.779236	0.794894	0.753836	0.754249	0.752003	0.77054	0.785937	0.72597
29.9	0.84775	0.822324	0.822293	0.819316	0.825869	0.853628	0.805484	0.804656	0.790352	0.815968	0.832771	0.836705	0.769476	0.784155	0.769685	0.791222	0.7784	0.789688	0.747362	0.757433	0.753601	0.772012	0.785739	0.722347

## Sheet: position variants
time	LDDD						DLDD						DDLD						DDDL
0	0.0188075	0.0140847	0.00737232	0.00415668	0.00750352	0.00718588	0.0152944	0.0201791	0.00824037	0.00448258	0.00848541	0.00828365	0.0113395	0.0125469	0.00800999	0.0048803	0.00819111	0.0079504	0.0145005	0.0128483	0.0091722	0.00542716	0.008363	0.00821364
0.1	0.0207516	0.0150249	0.00903026	0.00539125	0.009061	0.00866171	0.0165571	0.0227266	0.00868057	0.0054244	0.00890474	0.00882133	0.0118917	0.013773	0.00869703	0.00587459	0.00906882	0.00902016	0.0156173	0.0141465	0.00975639	0.00654573	0.0106602	0.00917418
0.2	0.0240668	0.0167636	0.0104455	0.00735773	0.0119103	0.0101403	0.0154819	0.0254081	0.00966588	0.00610935	0.0107982	0.0099359	0.0126939	0.0142186	0.00941493	0.00653468	0.0110612	0.0102804	0.0177302	0.015625	0.0109577	0.00773612	0.0124546	0.0109693
0.3	0.0265255	0.0191591	0.0134672	0.0104925	0.0157806	0.0133496	0.0189471	0.0275409	0.0106059	0.00758421	0.012439	0.0117226	0.013917	0.0152309	0.0100032	0.00810621	0.0122333	0.0113333	0.0180782	0.0167636	0.0118998	0.00977717	0.0140668	0.0123415
0.4	0.0295927	0.0215417	0.0169827	0.0144697	0.0202056	0.0168613	0.0211017	0.0295114	0.0118093	0.00967222	0.0150201	0.0136017	0.0156403	0.0166193	0.0117537	0.00999812	0.0141085	0.0135961	0.0203161	0.0176548	0.013422	0.0115862	0.0160488	0.0153827
0.5	0.0321182	0.0244962	0.0199509	0.018944	0.0255396	0.0221009	0.0219831	0.0334988	0.0139095	0.0118486	0.0181637	0.0161808	0.0159382	0.0179253	0.0135516	0.0113294	0.0167547	0.0155731	0.0221268	0.020192	0.0153638	0.0143343	0.0193852	0.0167101
0.6	0.0358751	0.0280406	0.0248939	0.0238077	0.0312538	0.0265816	0.0234062	0.0361261	0.0154543	0.0153728	0.0220235	0.0183456	0.0180511	0.0202281	0.0147529	0.0138482	0.0199347	0.0178863	0.0234271	0.0218534	0.0178034	0.0175658	0.0235472	0.019869
0.7	0.0402342	0.0340938	0.0298143	0.0292928	0.038424	0.0320732	0.022729	0.0386582	0.0178157	0.0173393	0.0256542	0.021104	0.0199494	0.0224587	0.0167626	0.0169609	0.0230471	0.019981	0.0267339	0.0253926	0.0206071	0.0210375	0.0273757	0.0235095
0.8	0.045631	0.0380967	0.0349465	0.0363468	0.0461541	0.0391779	0.0273778	0.0410357	0.0199283	0.0215816	0.0295062	0.0245569	0.0224602	0.0244267	0.0196156	0.0203249	0.0265189	0.0237084	0.0269402	0.0268686	0.0230632	0.0249732	0.0323555	0.0271837
0.9	0.0515362	0.0449742	0.0406938	0.0432515	0.0534727	0.0466802	0.0296469	0.0446857	0.0231619	0.024639	0.0336161	0.0279174	0.0253212	0.0274997	0.0222753	0.0236088	0.030746	0.0277354	0.0314952	0.0306757	0.0264305	0.0298038	0.037765	0.0316588
1	0.0567246	0.0496107	0.0459268	0.0514544	0.0621118	0.054261	0.0312264	0.0487632	0.0253547	0.0284146	0.0381219	0.0313255	0.0273986	0.0299802	0.0248199	0.0279229	0.0359627	0.0311211	0.0361147	0.032605	0.0297649	0.0347062	0.0440236	0.0351173
1.1	0.0626069	0.0564933	0.0532251	0.0576798	0.0714931	0.0608336	0.0340539	0.0527583	0.0287899	0.0335683	0.044034	0.0362347	0.0306096	0.0332927	0.0279403	0.0322122	0.0400075	0.0355234	0.0377108	0.0369942	0.0333708	0.0391114	0.04867	0.0409898
1.2	0.069729	0.0624564	0.0602025	0.0664378	0.0814162	0.0700414	0.0349687	0.0565319	0.032007	0.0376421	0.0499098	0.0408862	0.0334559	0.0376691	0.0316142	0.0364296	0.046365	0.0396288	0.04247	0.0414993	0.0374005	0.0457428	0.057158	0.0466382
1.3	0.0752946	0.0696275	0.0671593	0.0755134	0.0906335	0.0785827	0.0404217	0.0619154	0.0351769	0.0429892	0.0547046	0.0453948	0.0363293	0.0415534	0.0352448	0.0404896	0.0512537	0.0449132	0.0448204	0.0460251	0.0417902	0.0515925	0.0636823	0.0513905
1.4	0.082698	0.0767523	0.0740934	0.0829319	0.098611	0.087446	0.0442141	0.065738	0.0391983	0.0487947	0.060635	0.0507689	0.0401134	0.0452498	0.0395727	0.0474386	0.0568195	0.05015	0.0477272	0.0488714	0.0466694	0.0602207	0.0712431	0.0573134
1.5	0.0899305	0.0831481	0.083315	0.093488	0.108969	0.0981296	0.0467708	0.0694884	0.0425965	0.0524901	0.0666279	0.054485	0.0441766	0.0490491	0.0431725	0.0522526	0.062591	0.0543422	0.055066	0.0546954	0.0515383	0.0653827	0.0791894	0.0646029
1.6	0.0982486	0.0915994	0.0894552	0.100697	0.118522	0.106259	0.0519425	0.0732646	0.0472433	0.0592679	0.0730194	0.061094	0.0485607	0.053835	0.0475992	0.0578013	0.0709227	0.0611416	0.0588813	0.0600814	0.0563661	0.0716385	0.086185	0.0700918
1.7	0.105379	0.0994222	0.0988577	0.110965	0.130115	0.114411	0.0556036	0.0774297	0.0507423	0.0633334	0.0798092	0.0660032	0.0520738	0.0574695	0.0518263	0.0653358	0.0766448	0.0684171	0.0654658	0.066315	0.0609306	0.0789907	0.0943397	0.0771796
1.8	0.11327	0.10734	0.107012	0.123747	0.142168	0.126887	0.0588292	0.0821409	0.0554055	0.0697134	0.0866017	0.0711979	0.0566517	0.0631776	0.0572198	0.0712242	0.0833201	0.0749533	0.0705521	0.0723373	0.0679862	0.08684	0.102947	0.0842059
1.9	0.121607	0.113883	0.116859	0.131249	0.151977	0.135638	0.063903	0.0873364	0.0610479	0.0766375	0.0927223	0.0776977	0.0621798	0.0667168	0.062566	0.0782201	0.0895422	0.0803777	0.0756926	0.0775199	0.0733611	0.09372	0.11229	0.0907057
2	0.130373	0.122342	0.124342	0.142744	0.159921	0.147143	0.0686101	0.0915402	0.0651537	0.0812223	0.0997778	0.0835366	0.0668473	0.0736201	0.0665627	0.0845532	0.0981552	0.0860234	0.0814582	0.0828467	0.0787381	0.102011	0.120442	0.0993814
2.1	0.140204	0.13111	0.135232	0.152828	0.171151	0.15863	0.0730192	0.0973976	0.0693232	0.0887209	0.106008	0.091473	0.0718586	0.0793899	0.0730423	0.0911652	0.107263	0.0932177	0.0868175	0.0881813	0.0858431	0.110819	0.130235	0.106405
2.2	0.146503	0.139572	0.142894	0.1635	0.182538	0.17	0.0767553	0.102727	0.0748422	0.0940818	0.111764	0.0963513	0.0774137	0.0833181	0.0780902	0.0979512	0.112761	0.101132	0.093179	0.096934	0.0911974	0.119599	0.13691	0.115002
2.3	0.155796	0.148214	0.153087	0.177378	0.194042	0.179076	0.0831606	0.108948	0.0789418	0.102116	0.120434	0.104607	0.0820187	0.0884466	0.0843168	0.106947	0.120116	0.107066	0.0991009	0.0999915	0.0994831	0.129818	0.148802	0.122286
2.4	0.164908	0.15506	0.161837	0.183896	0.204494	0.189264	0.0879364	0.113342	0.0848063	0.109571	0.126234	0.110337	0.087553	0.0953885	0.089052	0.113437	0.127174	0.11689	0.103902	0.107261	0.105199	0.138786	0.156425	0.131354
2.5	0.172199	0.164192	0.171643	0.194698	0.215149	0.202972	0.0927623	0.1199	0.0903273	0.115111	0.132297	0.117506	0.0936999	0.100728	0.0949535	0.122032	0.134975	0.123952	0.110042	0.113345	0.112718	0.146602	0.166828	0.13873
2.6	0.182447	0.174325	0.182348	0.206428	0.225778	0.212692	0.0963587	0.123689	0.0951058	0.123518	0.141411	0.123991	0.0985362	0.106787	0.10116	0.130804	0.143716	0.131222	0.11606	0.121242	0.118136	0.155081	0.174823	0.146014
2.7	0.189565	0.183977	0.191084	0.217697	0.236347	0.223734	0.102041	0.13137	0.100001	0.130683	0.148555	0.13041	0.1055	0.112513	0.106419	0.13817	0.151935	0.138677	0.124218	0.127878	0.125461	0.164105	0.185103	0.153416
2.8	0.198312	0.190375	0.20019	0.228645	0.245223	0.233832	0.1082	0.135139	0.105339	0.138872	0.156714	0.137655	0.11074	0.12005	0.113905	0.146058	0.160681	0.14616	0.129908	0.135113	0.13236	0.173545	0.1963	0.160909
2.9	0.209027	0.201899	0.210304	0.240745	0.257034	0.246541	0.112962	0.138513	0.112309	0.145892	0.164281	0.145843	0.116569	0.125175	0.120236	0.156029	0.168245	0.153606	0.136387	0.142841	0.138739	0.182897	0.203991	0.172313
3	0.217682	0.208713	0.217545	0.251342	0.267197	0.255749	0.118317	0.146127	0.118031	0.150555	0.170828	0.152136	0.12269	0.132772	0.128238	0.162475	0.17499	0.162116	0.143015	0.147521	0.145965	0.191483	0.214136	0.179014
3.1	0.228149	0.216886	0.229605	0.259159	0.277359	0.267709	0.124039	0.151441	0.124716	0.160707	0.177972	0.160363	0.130631	0.138312	0.135147	0.170037	0.184385	0.171142	0.151385	0.154463	0.154249	0.201863	0.221689	0.188502
3.2	0.237342	0.226099	0.237525	0.272664	0.287777	0.277511	0.12966	0.157077	0.129711	0.167598	0.186882	0.167493	0.135357	0.143688	0.139052	0.181331	0.193524	0.179882	0.157438	0.162188	0.161691	0.212344	0.233362	0.196413
3.3	0.246144	0.234471	0.246446	0.282861	0.2967	0.287808	0.134255	0.164151	0.135071	0.17713	0.191326	0.173906	0.144205	0.150171	0.147703	0.189326	0.201756	0.189703	0.164381	0.169696	0.169567	0.221514	0.243913	0.204484
3.4	0.254362	0.243079	0.256241	0.292652	0.308165	0.301622	0.139966	0.169153	0.142145	0.182148	0.201728	0.181252	0.150345	0.156686	0.153093	0.197212	0.208981	0.198121	0.171845	0.176296	0.176485	0.230882	0.251101	0.213342
3.5	0.263565	0.250804	0.26714	0.302951	0.317054	0.309629	0.145351	0.174845	0.148919	0.190663	0.207419	0.189037	0.154567	0.164019	0.159902	0.205638	0.21817	0.204557	0.178682	0.183104	0.18532	0.240844	0.260587	0.222247
3.6	0.272392	0.259843	0.275368	0.312676	0.324719	0.319993	0.152567	0.179703	0.152727	0.200832	0.217883	0.198304	0.162775	0.170693	0.167665	0.216653	0.227382	0.213135	0.184829	0.193397	0.193063	0.250519	0.269069	0.230592
3.7	0.279739	0.268111	0.285509	0.324356	0.337007	0.331632	0.157478	0.187745	0.158429	0.208939	0.223345	0.203185	0.16959	0.175695	0.175259	0.222908	0.234807	0.220886	0.193282	0.199743	0.201437	0.258949	0.280881	0.240901
3.8	0.290274	0.276496	0.294463	0.336246	0.347811	0.342618	0.163179	0.192109	0.165799	0.214062	0.231648	0.210427	0.175496	0.184446	0.182572	0.234506	0.240998	0.229688	0.201494	0.206075	0.207015	0.268389	0.288749	0.248834
3.9	0.298761	0.284787	0.301578	0.345626	0.358203	0.351058	0.169242	0.198211	0.171133	0.223676	0.240381	0.219898	0.184541	0.190311	0.190166	0.24191	0.250234	0.238543	0.208029	0.213947	0.217117	0.277973	0.296859	0.256852
4	0.307071	0.294029	0.314399	0.356237	0.365175	0.363022	0.174768	0.200774	0.178345	0.229866	0.245392	0.229999	0.190577	0.195316	0.195728	0.252085	0.259191	0.248176	0.215399	0.219969	0.223251	0.288062	0.309613	0.263979
4.1	0.318325	0.300351	0.321942	0.365558	0.372634	0.370625	0.179346	0.207919	0.183991	0.238295	0.251802	0.235034	0.197447	0.204161	0.201243	0.261053	0.26579	0.254525	0.223794	0.229224	0.231039	0.294141	0.315244	0.27443
4.2	0.325018	0.309132	0.332081	0.373665	0.383745	0.382683	0.184974	0.212852	0.191637	0.247663	0.259975	0.241609	0.203794	0.211397	0.210775	0.2694	0.274067	0.266026	0.229536	0.235975	0.238671	0.304813	0.32592	0.28205
4.3	0.33612	0.318727	0.341622	0.382704	0.392306	0.393566	0.192415	0.222426	0.19695	0.254267	0.268741	0.251184	0.209827	0.218465	0.217819	0.277128	0.284563	0.271767	0.237961	0.244342	0.244949	0.313441	0.333809	0.289776
4.4	0.343492	0.328327	0.345697	0.397544	0.401554	0.400175	0.198273	0.228886	0.203837	0.263555	0.275487	0.258986	0.219876	0.22509	0.225434	0.282853	0.292236	0.281109	0.244954	0.250508	0.254256	0.326038	0.340852	0.298598
4.5	0.353256	0.333262	0.358152	0.405529	0.410264	0.410643	0.20349	0.234128	0.210202	0.270176	0.282769	0.262691	0.225834	0.230017	0.23272	0.292644	0.298221	0.290205	0.251778	0.257744	0.263229	0.332258	0.351069	0.306212
4.6	0.360118	0.343679	0.363506	0.413157	0.41859	0.422038	0.211944	0.239751	0.217446	0.280094	0.291512	0.271983	0.234114	0.237876	0.241182	0.305153	0.306152	0.296089	0.260259	0.263838	0.270112	0.341171	0.36256	0.314557
4.7	0.36898	0.351252	0.373701	0.425462	0.426261	0.426174	0.216109	0.246114	0.221223	0.288183	0.297891	0.280857	0.240909	0.24521	0.248626	0.311883	0.315169	0.306935	0.265437	0.273619	0.275259	0.349934	0.368462	0.32141
4.8	0.378761	0.360581	0.38275	0.429798	0.436395	0.43737	0.221454	0.250181	0.228001	0.294108	0.306149	0.28799	0.249461	0.252466	0.253382	0.322834	0.320279	0.317302	0.272913	0.280663	0.287302	0.358499	0.376796	0.329814
4.9	0.383945	0.367273	0.391953	0.439801	0.444398	0.44646	0.228468	0.258679	0.236001	0.302244	0.313187	0.294702	0.254806	0.262648	0.261818	0.335904	0.331996	0.324846	0.281114	0.286815	0.295919	0.368762	0.384953	0.341425
5	0.392217	0.372459	0.398366	0.450703	0.454168	0.451966	0.236019	0.262983	0.241898	0.311593	0.319425	0.302387	0.264091	0.265311	0.267353	0.337398	0.336877	0.331632	0.287243	0.293803	0.301788	0.376979	0.397937	0.347972
5.1	0.40358	0.380634	0.409764	0.461709	0.459163	0.460527	0.238267	0.270649	0.249227	0.318647	0.325568	0.309309	0.269921	0.2736	0.276081	0.346562	0.346467	0.342046	0.294577	0.301587	0.307934	0.382613	0.405373	0.354172
5.2	0.411342	0.387988	0.416258	0.467233	0.468542	0.470899	0.246737	0.272529	0.254588	0.32585	0.33054	0.320676	0.278035	0.277317	0.284081	0.352704	0.352403	0.346684	0.303033	0.308735	0.314037	0.392937	0.412379	0.363248
5.3	0.418264	0.397568	0.422948	0.478128	0.476511	0.478489	0.250669	0.281542	0.260341	0.333556	0.339362	0.324042	0.284165	0.286011	0.291135	0.363407	0.361271	0.356844	0.307732	0.313348	0.32156	0.397953	0.416012	0.370053
5.4	0.424804	0.405939	0.430536	0.485251	0.479553	0.484795	0.259733	0.285017	0.267526	0.341389	0.347548	0.328826	0.291766	0.29228	0.297351	0.373596	0.370277	0.365349	0.315385	0.324059	0.330298	0.408219	0.425273	0.37659
5.5	0.432743	0.413376	0.439655	0.492791	0.490438	0.494373	0.264616	0.292762	0.273393	0.349691	0.353111	0.336025	0.297609	0.300415	0.30577	0.380194	0.376366	0.374131	0.324395	0.330107	0.337526	0.415919	0.43528	0.385156
5.6	0.44201	0.417474	0.446373	0.503773	0.495639	0.503541	0.269356	0.298877	0.281808	0.354287	0.361065	0.345987	0.302016	0.305595	0.312488	0.389358	0.383581	0.383607	0.329748	0.337662	0.347108	0.424406	0.443877	0.392916
5.7	0.4486	0.423267	0.457507	0.507059	0.505653	0.511175	0.277185	0.304083	0.286854	0.363122	0.365748	0.353576	0.314458	0.312632	0.318419	0.397141	0.390384	0.390256	0.336716	0.343733	0.351835	0.433297	0.450883	0.4002
5.8	0.457164	0.433491	0.463125	0.512862	0.5085	0.517333	0.282631	0.308792	0.293185	0.370569	0.372001	0.357799	0.319434	0.318023	0.3277	0.404018	0.399856	0.399354	0.342102	0.349807	0.360271	0.439765	0.45585	0.407775
5.9	0.462073	0.437787	0.471067	0.519563	0.520551	0.526535	0.287057	0.31221	0.299472	0.374874	0.378341	0.369213	0.327266	0.329233	0.334727	0.414174	0.405039	0.408388	0.352167	0.358969	0.365232	0.444869	0.465096	0.414664
6	0.472852	0.445741	0.478913	0.530859	0.528419	0.534578	0.293608	0.320074	0.306157	0.38572	0.386357	0.376027	0.33422	0.333648	0.341356	0.420294	0.413611	0.414765	0.358726	0.363739	0.374388	0.453371	0.471545	0.420917
6.1	0.476266	0.453108	0.485884	0.536535	0.53232	0.541162	0.301685	0.325169	0.313692	0.394119	0.394087	0.38335	0.340562	0.339109	0.348932	0.427152	0.420986	0.422421	0.364106	0.371624	0.378946	0.461753	0.478189	0.427661
6.2	0.483573	0.45989	0.492808	0.546074	0.542342	0.548687	0.307419	0.330792	0.318231	0.393222	0.398283	0.38799	0.348993	0.346054	0.354155	0.436705	0.426521	0.429103	0.370505	0.374725	0.387635	0.472458	0.482848	0.431859
6.3	0.494796	0.467399	0.500431	0.553495	0.543434	0.556402	0.313126	0.337226	0.324028	0.407669	0.406719	0.392227	0.353144	0.354446	0.361801	0.443941	0.433631	0.436449	0.376081	0.383205	0.393234	0.477264	0.492115	0.442147
6.4	0.493821	0.47237	0.504654	0.559505	0.55126	0.564977	0.317996	0.342731	0.333038	0.414386	0.412037	0.39787	0.361168	0.358773	0.368338	0.451758	0.437853	0.442528	0.384249	0.390155	0.401016	0.483492	0.500025	0.44844
6.5	0.506048	0.47787	0.512643	0.56148	0.55648	0.567923	0.324064	0.347978	0.336526	0.418167	0.418504	0.410119	0.36953	0.365684	0.378751	0.457458	0.44438	0.453422	0.391709	0.395355	0.406658	0.489483	0.507359	0.45322
6.6	0.516381	0.486326	0.519952	0.571023	0.564111	0.575999	0.330827	0.352053	0.344164	0.424948	0.421953	0.415216	0.374093	0.370707	0.383342	0.468186	0.452589	0.457449	0.394774	0.402977	0.41263	0.497832	0.508166	0.460065
6.7	0.517719	0.495437	0.526156	0.577726	0.5674	0.581625	0.338324	0.360337	0.34986	0.433802	0.431282	0.423105	0.381966	0.377224	0.388873	0.471815	0.4624	0.466475	0.404217	0.41342	0.416972	0.50248	0.520532	0.46168
6.8	0.528446	0.500135	0.531568	0.58594	0.577474	0.588615	0.343319	0.364131	0.355879	0.436418	0.437077	0.427462	0.38801	0.384815	0.39606	0.481178	0.466088	0.471485	0.41051	0.415434	0.427526	0.506968	0.522647	0.470463
6.9	0.533342	0.501392	0.536717	0.590784	0.581339	0.597571	0.349749	0.370068	0.36099	0.448289	0.43859	0.432685	0.39667	0.390162	0.399777	0.489416	0.470263	0.479724	0.418157	0.420027	0.430205	0.516069	0.534284	0.477951
7	0.539077	0.512069	0.545922	0.594833	0.585382	0.601867	0.355065	0.376201	0.368464	0.454395	0.444692	0.44189	0.40149	0.396509	0.407598	0.495758	0.477806	0.487369	0.422623	0.42948	0.436871	0.520524	0.536962	0.483706
7.1	0.545107	0.515093	0.550887	0.600835	0.593122	0.607151	0.357386	0.380068	0.370623	0.458723	0.452123	0.446287	0.408429	0.40221	0.415256	0.501618	0.486534	0.491088	0.426142	0.434165	0.443575	0.524473	0.54316	0.492059
7.2	0.552517	0.521968	0.556587	0.608507	0.59575	0.613587	0.368203	0.385106	0.381073	0.466462	0.456694	0.456007	0.413896	0.408914	0.423238	0.507286	0.490883	0.50176	0.437813	0.441303	0.448866	0.539575	0.548533	0.495935
7.3	0.558949	0.531251	0.560823	0.615415	0.601881	0.621489	0.372243	0.389912	0.386275	0.467144	0.464763	0.45951	0.42285	0.415838	0.429415	0.518093	0.498605	0.508915	0.438573	0.446728	0.457271	0.538846	0.552948	0.502387
7.4	0.562439	0.533649	0.56865	0.621223	0.609312	0.622971	0.377325	0.396965	0.393008	0.472295	0.469255	0.466273	0.424859	0.423738	0.434769	0.522192	0.502343	0.511374	0.44465	0.448652	0.462555	0.545583	0.562371	0.509682
7.5	0.566634	0.537997	0.575039	0.625416	0.614945	0.628944	0.384985	0.404391	0.394001	0.482572	0.472376	0.471689	0.431339	0.427891	0.441413	0.528282	0.506638	0.519596	0.449807	0.459854	0.467947	0.549527	0.564775	0.513077
7.6	0.576965	0.546163	0.584303	0.629224	0.616057	0.635298	0.388813	0.405764	0.400997	0.483194	0.479777	0.474728	0.439511	0.433395	0.446484	0.536985	0.510612	0.526622	0.456304	0.46507	0.473211	0.557282	0.567562	0.515236
7.7	0.581936	0.551449	0.58903	0.636585	0.623613	0.641918	0.397612	0.414334	0.408604	0.49301	0.486578	0.480191	0.447004	0.437285	0.451515	0.540296	0.520478	0.53014	0.462705	0.472257	0.479244	0.561718	0.574464	0.521397
7.8	0.586641	0.55599	0.594597	0.638676	0.624149	0.643994	0.397798	0.415233	0.413944	0.500229	0.489661	0.487912	0.451192	0.445108	0.459254	0.548513	0.524236	0.538353	0.471383	0.474124	0.487544	0.566383	0.582483	0.531946
7.9	0.592692	0.560786	0.59876	0.646837	0.633492	0.648533	0.408104	0.423241	0.418523	0.508932	0.496246	0.495028	0.460119	0.448611	0.466552	0.550885	0.528643	0.544528	0.473673	0.482385	0.488706	0.570705	0.586082	0.536942
8	0.598039	0.567079	0.601004	0.652041	0.637977	0.65158	0.410462	0.427038	0.423888	0.508236	0.502775	0.498495	0.466931	0.456364	0.472482	0.562019	0.536519	0.545842	0.479625	0.487717	0.499583	0.57397	0.591489	0.538731
8.1	0.602509	0.570013	0.606789	0.655327	0.640159	0.659928	0.415701	0.432756	0.429518	0.51279	0.50403	0.506129	0.471581	0.464336	0.477454	0.563262	0.541361	0.554302	0.484936	0.494687	0.499388	0.584354	0.597091	0.541316
8.2	0.610225	0.573451	0.613352	0.656929	0.645691	0.660432	0.421364	0.436852	0.43538	0.521546	0.508104	0.511592	0.47374	0.465452	0.483753	0.572553	0.54696	0.563269	0.489903	0.49751	0.506894	0.582987	0.604592	0.552025
8.3	0.610452	0.583088	0.620202	0.664842	0.647564	0.670337	0.42749	0.441473	0.441002	0.531118	0.517386	0.515743	0.47977	0.475302	0.490368	0.57904	0.552523	0.566595	0.497613	0.502247	0.511679	0.593027	0.607233	0.552159
8.4	0.615976	0.585434	0.622029	0.66598	0.65307	0.674888	0.43236	0.448178	0.447539	0.532196	0.519415	0.518921	0.488639	0.478207	0.493777	0.580245	0.556089	0.570835	0.499303	0.510328	0.519388	0.596371	0.613773	0.555814
8.5	0.623269	0.59201	0.628868	0.66854	0.659766	0.673518	0.439667	0.453062	0.451869	0.535413	0.523429	0.52681	0.494683	0.484675	0.499145	0.589834	0.560647	0.575795	0.505783	0.514632	0.52031	0.595929	0.616391	0.565229
8.6	0.630699	0.594921	0.631277	0.673012	0.660886	0.677041	0.440641	0.458723	0.456413	0.543749	0.531031	0.534497	0.501883	0.484304	0.50529	0.58974	0.566707	0.582715	0.511682	0.513609	0.527277	0.60835	0.618584	0.565237
8.7	0.632308	0.601724	0.637765	0.678538	0.666264	0.682583	0.445454	0.46345	0.461397	0.546657	0.532716	0.537012	0.505327	0.49434	0.511366	0.597048	0.571041	0.589903	0.517052	0.526746	0.529873	0.608756	0.62229	0.569541
8.8	0.63689	0.605258	0.644086	0.684446	0.668248	0.686224	0.453432	0.466781	0.467488	0.550604	0.537636	0.542179	0.510347	0.499896	0.515447	0.604494	0.576529	0.597728	0.521607	0.528204	0.534067	0.611272	0.625319	0.575856
8.9	0.642172	0.609454	0.643955	0.689235	0.673999	0.690651	0.457992	0.47048	0.470053	0.559677	0.541439	0.547723	0.516494	0.503984	0.520246	0.606102	0.5813	0.598924	0.525183	0.53273	0.540983	0.618762	0.633489	0.580889
9	0.645621	0.616172	0.651302	0.691652	0.680544	0.694788	0.461096	0.47277	0.47732	0.560911	0.547817	0.550261	0.519896	0.510871	0.527238	0.613045	0.582709	0.602984	0.530925	0.537299	0.547769	0.622129	0.63812	0.583465
9.1	0.652636	0.617189	0.655476	0.694165	0.677101	0.697118	0.468054	0.479536	0.482311	0.563803	0.556628	0.560989	0.524737	0.513061	0.533275	0.618677	0.590622	0.612237	0.535203	0.543669	0.548483	0.625711	0.638148	0.586364
9.2	0.657927	0.623204	0.659948	0.700308	0.682659	0.701363	0.475199	0.483647	0.485051	0.565645	0.557678	0.561669	0.531177	0.519897	0.53582	0.622645	0.592645	0.614183	0.540981	0.549748	0.554975	0.629749	0.646173	0.589839
9.3	0.660394	0.625751	0.665481	0.706155	0.686386	0.709817	0.477701	0.486452	0.489903	0.572776	0.560975	0.565979	0.534751	0.522038	0.540506	0.622367	0.601425	0.619963	0.543738	0.550065	0.560327	0.629884	0.65078	0.594852
9.4	0.665572	0.637348	0.667705	0.710739	0.692017	0.708865	0.481027	0.4919	0.496196	0.577345	0.563845	0.566657	0.542519	0.527777	0.544293	0.631829	0.600079	0.622598	0.550737	0.55677	0.562034	0.634287	0.652582	0.599758
9.5	0.670221	0.634563	0.675628	0.714722	0.693535	0.7118	0.487499	0.497212	0.499472	0.582846	0.570494	0.575154	0.545382	0.535993	0.550102	0.637007	0.603579	0.628446	0.550485	0.560523	0.567965	0.639913	0.659763	0.604608
9.6	0.668306	0.640181	0.677284	0.713156	0.696382	0.716628	0.492948	0.503966	0.503856	0.587423	0.57395	0.580393	0.553494	0.53529	0.556988	0.636867	0.606421	0.635122	0.555896	0.568282	0.574234	0.641554	0.660966	0.609789
9.7	0.678656	0.646793	0.683712	0.722607	0.700901	0.720764	0.496569	0.504329	0.507746	0.588743	0.577144	0.579819	0.556188	0.541052	0.559484	0.643788	0.614448	0.633091	0.562685	0.570265	0.576069	0.65035	0.665709	0.61516
9.8	0.679472	0.649122	0.684926	0.721892	0.701745	0.722108	0.500105	0.51183	0.511378	0.59707	0.577802	0.587842	0.561312	0.545637	0.561263	0.64935	0.617354	0.640683	0.563008	0.576125	0.580498	0.651723	0.665201	0.615771
9.9	0.683211	0.650907	0.690795	0.725825	0.705586	0.729233	0.505081	0.516945	0.517407	0.598622	0.582926	0.592662	0.566348	0.551335	0.567613	0.650892	0.621323	0.64387	0.571762	0.578546	0.581121	0.656067	0.671478	0.617835
10	0.690297	0.653539	0.692685	0.726419	0.712686	0.731367	0.509824	0.517775	0.521976	0.606927	0.589028	0.594124	0.570586	0.551621	0.571418	0.657404	0.62567	0.643954	0.573639	0.584945	0.587782	0.655844	0.674567	0.623956
10.1	0.690779	0.657341	0.696674	0.728924	0.710452	0.732702	0.512268	0.523454	0.526613	0.609073	0.588637	0.600937	0.575173	0.560157	0.574905	0.659871	0.62802	0.647707	0.579228	0.590158	0.593508	0.66	0.676335	0.627101
10.2	0.697976	0.662614	0.699037	0.731194	0.717416	0.737063	0.518765	0.528377	0.530188	0.614774	0.5952	0.601825	0.578432	0.566041	0.581535	0.665919	0.630827	0.660051	0.584168	0.591374	0.597565	0.663969	0.686285	0.631151
10.3	0.702962	0.667768	0.699817	0.733959	0.719145	0.743781	0.523345	0.529247	0.537469	0.61623	0.597547	0.603012	0.584312	0.569263	0.586496	0.668283	0.636586	0.660519	0.586614	0.594424	0.601484	0.668924	0.683209	0.632321
10.4	0.702287	0.671233	0.706233	0.737036	0.720171	0.743879	0.527054	0.538057	0.53957	0.619732	0.59911	0.611973	0.587746	0.569747	0.594784	0.671774	0.639313	0.666108	0.588373	0.599421	0.605279	0.669374	0.686245	0.639927
10.5	0.702889	0.673845	0.710155	0.741162	0.725857	0.74997	0.528181	0.537315	0.542314	0.62003	0.606181	0.613724	0.592988	0.578971	0.59392	0.676044	0.645019	0.668301	0.593578	0.605026	0.60541	0.670543	0.689524	0.63641
10.6	0.709651	0.676809	0.713572	0.743697	0.725604	0.746405	0.532688	0.543337	0.548662	0.629846	0.608337	0.618582	0.595868	0.579273	0.597092	0.676108	0.643102	0.675045	0.595922	0.603985	0.608344	0.677279	0.69371	0.644696
10.7	0.713149	0.679777	0.716262	0.746719	0.726318	0.751922	0.537816	0.544615	0.552967	0.629186	0.612822	0.620058	0.600677	0.586253	0.602107	0.680077	0.653038	0.676767	0.60279	0.610193	0.614992	0.676376	0.699916	0.646329
10.8	0.717327	0.687839	0.721088	0.754472	0.730123	0.753479	0.541911	0.550727	0.555682	0.635055	0.609502	0.623954	0.606086	0.588525	0.605972	0.687614	0.653476	0.680206	0.607026	0.612146	0.61607	0.680229	0.700966	0.648729
10.9	0.722538	0.688944	0.729886	0.755087	0.729626	0.753689	0.544824	0.555804	0.556558	0.637209	0.612437	0.629479	0.609256	0.594207	0.608619	0.691892	0.658075	0.684012	0.609425	0.615893	0.620056	0.688164	0.702266	0.653165
11	0.72338	0.690894	0.723915	0.754858	0.737793	0.758049	0.549274	0.556129	0.560921	0.638546	0.62291	0.632895	0.615007	0.597345	0.614181	0.690265	0.662493	0.683748	0.611289	0.621344	0.623109	0.685302	0.705636	0.653935
11.1	0.725514	0.695116	0.727831	0.757117	0.740466	0.76176	0.556194	0.559307	0.567668	0.638847	0.625967	0.637261	0.616026	0.599895	0.618073	0.696673	0.665384	0.690234	0.615178	0.623093	0.627313	0.688581	0.70866	0.656243
11.2	0.730492	0.695067	0.731332	0.760562	0.7394	0.764053	0.560218	0.565337	0.572663	0.6451	0.628621	0.639404	0.620739	0.600951	0.623335	0.693417	0.668996	0.69192	0.618572	0.626344	0.627865	0.69683	0.71521	0.65962
11.3	0.730763	0.702375	0.736333	0.759766	0.743172	0.766204	0.560722	0.568171	0.574652	0.650162	0.629598	0.63911	0.623275	0.607653	0.62619	0.704185	0.668436	0.694516	0.623873	0.629674	0.632764	0.694682	0.714728	0.659942
11.4	0.731836	0.699188	0.735806	0.764655	0.743474	0.768444	0.565508	0.570695	0.577733	0.650648	0.633799	0.642103	0.62703	0.610417	0.630666	0.704078	0.672189	0.696283	0.624973	0.632379	0.635443	0.698258	0.71601	0.664215
11.5	0.735332	0.707653	0.742156	0.764301	0.747216	0.772942	0.567294	0.576594	0.581016	0.657887	0.637771	0.64713	0.63755	0.616272	0.632172	0.709718	0.672775	0.701769	0.629045	0.634439	0.639976	0.699026	0.719567	0.672754
11.6	0.741721	0.711143	0.753474	0.767952	0.744547	0.770864	0.572506	0.578709	0.584137	0.660257	0.63751	0.650272	0.634219	0.614036	0.638115	0.710676	0.675413	0.704329	0.632512	0.641265	0.639133	0.702376	0.720609	0.670365
11.7	0.741698	0.711795	0.74929	0.768331	0.751225	0.774339	0.577258	0.579	0.587348	0.662157	0.635935	0.654209	0.639957	0.622616	0.641503	0.710342	0.679646	0.703945	0.634116	0.640735	0.644812	0.70326	0.724826	0.677005
11.8	0.744596	0.717387	0.751902	0.769991	0.749706	0.777593	0.581874	0.583394	0.590536	0.662997	0.642636	0.656861	0.642516	0.625228	0.640842	0.715382	0.683659	0.710274	0.6353	0.648001	0.647505	0.701534	0.726401	0.671121
11.9	0.751733	0.718999	0.752676	0.773032	0.754061	0.780021	0.586035	0.583129	0.594693	0.665422	0.647392	0.662714	0.64425	0.629146	0.645645	0.71581	0.688946	0.715418	0.641095	0.650077	0.651563	0.708836	0.725081	0.676201
12	0.751037	0.718007	0.75803	0.776578	0.756975	0.78476	0.588802	0.588775	0.597129	0.666433	0.648921	0.662263	0.6486	0.633574	0.647626	0.719528	0.683248	0.712514	0.643416	0.651868	0.654904	0.709008	0.726907	0.678189
12.1	0.753031	0.721789	0.757485	0.774319	0.756783	0.783707	0.58789	0.59216	0.59826	0.669167	0.652827	0.662037	0.653318	0.634239	0.653952	0.721326	0.690553	0.718572	0.648456	0.655136	0.658039	0.714457	0.730449	0.680181
12.2	0.760078	0.726531	0.762718	0.775089	0.760708	0.781791	0.593747	0.600227	0.604353	0.67223	0.652356	0.665137	0.653653	0.636073	0.654558	0.721801	0.69116	0.722831	0.646444	0.656963	0.659045	0.715266	0.737796	0.683552
12.3	0.758065	0.727602	0.761731	0.783552	0.763226	0.787776	0.592993	0.597528	0.607498	0.676978	0.653671	0.668167	0.660811	0.641824	0.65795	0.730244	0.690449	0.722685	0.65242	0.658923	0.658888	0.71349	0.733954	0.685608
12.4	0.758547	0.73124	0.764742	0.784002	0.762682	0.787776	0.597773	0.605415	0.608992	0.67966	0.651517	0.670819	0.662155	0.642128	0.662134	0.728653	0.695382	0.726749	0.652422	0.663309	0.664697	0.720801	0.738911	0.689685
12.5	0.765123	0.735333	0.763234	0.786996	0.769058	0.789571	0.603765	0.606687	0.613058	0.684482	0.658299	0.673689	0.665224	0.641693	0.664257	0.733893	0.696809	0.733145	0.65795	0.665615	0.666325	0.72045	0.738359	0.687526
12.6	0.766271	0.735286	0.770409	0.785927	0.768235	0.792391	0.60293	0.609724	0.621671	0.683112	0.662289	0.673443	0.664184	0.6472	0.668618	0.736224	0.698046	0.726707	0.659636	0.666898	0.669904	0.719323	0.74525	0.688585
12.7	0.767298	0.736373	0.773291	0.788101	0.76532	0.797978	0.606566	0.609428	0.622004	0.687655	0.663297	0.678089	0.670754	0.654353	0.671368	0.735801	0.703081	0.733151	0.6613	0.6747	0.669982	0.724389	0.744828	0.688282
12.8	0.76954	0.740634	0.773879	0.790224	0.772483	0.793292	0.609975	0.613163	0.623086	0.686313	0.662618	0.678974	0.671017	0.652684	0.672771	0.735431	0.708269	0.733047	0.664255	0.674723	0.669589	0.72424	0.750412	0.696429
12.9	0.771597	0.741775	0.776278	0.791382	0.77391	0.801607	0.614513	0.613681	0.627445	0.687197	0.664857	0.680447	0.679533	0.658428	0.675392	0.743159	0.706477	0.737239	0.671615	0.674257	0.677107	0.728849	0.744815	0.692385
13	0.77491	0.744729	0.776895	0.791818	0.772167	0.800638	0.614055	0.617604	0.628893	0.69237	0.668785	0.680161	0.680223	0.658712	0.676449	0.741433	0.708537	0.740048	0.670806	0.677294	0.677687	0.726648	0.748243	0.696753
13.1	0.778357	0.749085	0.781408	0.794461	0.77598	0.802366	0.618941	0.626988	0.630206	0.696306	0.667204	0.683474	0.681962	0.661942	0.681941	0.743463	0.71078	0.744523	0.673275	0.68022	0.681429	0.729302	0.748823	0.699251
13.2	0.779638	0.742918	0.781556	0.798911	0.772899	0.804447	0.62092	0.627428	0.634149	0.699595	0.671639	0.688226	0.685067	0.663984	0.680146	0.74512	0.711754	0.745122	0.672946	0.683571	0.68248	0.731429	0.752626	0.700626
13.3	0.781272	0.754167	0.786637	0.79453	0.776212	0.804587	0.623542	0.624386	0.63793	0.697253	0.6764	0.689125	0.685865	0.671617	0.686205	0.743974	0.715101	0.747494	0.674724	0.684671	0.681622	0.730656	0.754014	0.703108
13.4	0.782343	0.750097	0.786137	0.798913	0.782614	0.803567	0.62883	0.629378	0.639863	0.697703	0.673905	0.69092	0.689685	0.670398	0.689875	0.748832	0.716666	0.749491	0.678912	0.688182	0.685835	0.735818	0.755176	0.704942
13.5	0.785762	0.750986	0.791006	0.797963	0.778963	0.811627	0.630241	0.628724	0.640608	0.699145	0.680008	0.694258	0.690745	0.67268	0.68895	0.75221	0.721349	0.748752	0.680639	0.687334	0.690762	0.735519	0.757671	0.708636
13.6	0.784806	0.757539	0.790819	0.797765	0.778952	0.810123	0.63291	0.635908	0.643963	0.700172	0.677554	0.695339	0.692662	0.676624	0.692138	0.747241	0.719997	0.752443	0.68231	0.687293	0.690618	0.735508	0.754574	0.708283
13.7	0.790334	0.756691	0.793729	0.797925	0.784893	0.808868	0.632768	0.638811	0.646376	0.700852	0.678609	0.699095	0.698807	0.675957	0.693555	0.749345	0.723456	0.756428	0.681402	0.693444	0.691661	0.736806	0.760523	0.709294
13.8	0.787746	0.760491	0.797434	0.801841	0.781231	0.811257	0.637252	0.638669	0.648046	0.710397	0.682867	0.698268	0.698313	0.680902	0.694312	0.756104	0.720622	0.755921	0.686988	0.69321	0.69249	0.739068	0.757077	0.713744
13.9	0.790207	0.76003	0.797856	0.800894	0.782176	0.817289	0.641601	0.639681	0.651757	0.705845	0.685266	0.70082	0.705612	0.682268	0.699979	0.75208	0.724555	0.756904	0.690643	0.699188	0.692527	0.736729	0.757348	0.712741
14	0.796241	0.763373	0.79679	0.804205	0.786258	0.813906	0.642399	0.641438	0.656	0.703857	0.686602	0.698204	0.703948	0.68321	0.69973	0.759327	0.727094	0.760903	0.6941	0.694843	0.696178	0.739389	0.767224	0.719294
14.1	0.796545	0.759365	0.800542	0.802935	0.783593	0.815962	0.647271	0.642407	0.656794	0.707251	0.683842	0.699075	0.705102	0.683069	0.702678	0.760515	0.728969	0.758002	0.693612	0.697542	0.696667	0.747202	0.767565	0.714637
14.2	0.797816	0.763597	0.80083	0.806188	0.788503	0.816852	0.646179	0.64712	0.657356	0.709839	0.686449	0.702716	0.711003	0.689475	0.708907	0.76107	0.731423	0.76018	0.695213	0.703637	0.70108	0.744587	0.769581	0.718594
14.3	0.799798	0.764692	0.80889	0.805873	0.788591	0.822274	0.649134	0.647968	0.661359	0.712192	0.691994	0.704054	0.710774	0.688081	0.70802	0.763564	0.7303	0.763877	0.697963	0.700499	0.700113	0.744324	0.766966	0.720789
14.4	0.802186	0.767286	0.805804	0.801087	0.78663	0.821299	0.651717	0.652048	0.662328	0.714692	0.693246	0.709414	0.713595	0.690657	0.711221	0.761984	0.733449	0.758836	0.700918	0.704662	0.709787	0.748138	0.771123	0.721159
14.5	0.802352	0.770511	0.8102	0.811259	0.791657	0.824086	0.657089	0.652991	0.665238	0.713894	0.694397	0.703309	0.715075	0.690121	0.711811	0.765585	0.736129	0.75915	0.70118	0.708415	0.7057	0.751058	0.768216	0.725438
14.6	0.80388	0.775122	0.806623	0.808627	0.788966	0.825791	0.655654	0.659721	0.665977	0.715672	0.696966	0.707639	0.715081	0.6955	0.714948	0.763108	0.734467	0.762233	0.704148	0.706117	0.708382	0.74623	0.766234	0.727222
14.7	0.803605	0.772692	0.808888	0.809726	0.792865	0.823288	0.65662	0.651605	0.670529	0.715634	0.698367	0.712595	0.715871	0.693037	0.714121	0.77006	0.738145	0.763278	0.706629	0.710643	0.707635	0.748846	0.776087	0.724842
14.8	0.809581	0.7732	0.811835	0.808986	0.793561	0.827561	0.65935	0.659961	0.672736	0.715769	0.700497	0.712674	0.720609	0.695613	0.713724	0.769692	0.741468	0.762773	0.702579	0.710635	0.71084	0.746432	0.772087	0.729868
14.9	0.810179	0.774408	0.813123	0.812229	0.794769	0.832809	0.661913	0.66018	0.672629	0.721787	0.699028	0.7097	0.72407	0.700451	0.716666	0.771195	0.739604	0.766596	0.706815	0.713884	0.712833	0.751237	0.775108	0.729412
15	0.810133	0.77763	0.813096	0.810676	0.794996	0.832294	0.665601	0.660785	0.671784	0.718694	0.703456	0.715959	0.72034	0.702594	0.721341	0.768276	0.741544	0.768467	0.710313	0.719751	0.71243	0.75308	0.77111	0.732117
15.1	0.808447	0.777105	0.813378	0.807265	0.794144	0.830866	0.666364	0.663279	0.675242	0.721677	0.698872	0.714374	0.724203	0.703032	0.726628	0.768806	0.745636	0.769192	0.712699	0.716529	0.715329	0.752754	0.775907	0.731454
15.2	0.810919	0.779812	0.816865	0.813099	0.799233	0.832594	0.664061	0.663575	0.677823	0.718882	0.699304	0.716188	0.72641	0.702375	0.727245	0.766513	0.745953	0.771791	0.71092	0.715857	0.717139	0.753325	0.778533	0.731084
15.3	0.815048	0.783135	0.819226	0.814413	0.795332	0.830955	0.668427	0.666009	0.681312	0.724474	0.705159	0.7169	0.728581	0.705515	0.724114	0.769825	0.745846	0.772244	0.715122	0.717387	0.716349	0.754891	0.777525	0.734918
15.4	0.811546	0.78264	0.819855	0.812408	0.798264	0.836447	0.672565	0.665697	0.686528	0.727394	0.709384	0.719328	0.729965	0.709736	0.723653	0.772374	0.744997	0.773267	0.714143	0.724491	0.719348	0.75285	0.777981	0.735116
15.5	0.812571	0.785837	0.822118	0.816319	0.800226	0.834047	0.669708	0.669188	0.685979	0.726112	0.708863	0.719924	0.730315	0.707367	0.723886	0.774459	0.747435	0.775303	0.719288	0.721266	0.718891	0.753331	0.778535	0.73657
15.6	0.817884	0.785265	0.823126	0.808517	0.799012	0.832518	0.676624	0.670519	0.682848	0.72975	0.706448	0.722915	0.734772	0.708619	0.728732	0.77091	0.746044	0.776731	0.719063	0.724197	0.721631	0.75453	0.782718	0.740852
15.7	0.818212	0.785925	0.825525	0.810776	0.800121	0.836693	0.676049	0.670651	0.68889	0.727637	0.709623	0.722386	0.732378	0.711032	0.727718	0.772755	0.747474	0.778299	0.722461	0.725629	0.721907	0.756062	0.783731	0.74172
15.8	0.822166	0.786247	0.824657	0.809373	0.798322	0.838477	0.676611	0.675689	0.687868	0.727775	0.710795	0.721548	0.73433	0.711408	0.731497	0.772689	0.750139	0.775541	0.720788	0.726145	0.720023	0.755154	0.779009	0.739561
15.9	0.822404	0.784263	0.825286	0.809276	0.798856	0.838329	0.67962	0.678167	0.693148	0.731357	0.713936	0.72219	0.736803	0.715777	0.731587	0.772051	0.748349	0.779386	0.724464	0.729158	0.726274	0.755659	0.781494	0.740306
16	0.821727	0.790342	0.827285	0.814377	0.800848	0.842157	0.679791	0.679331	0.691095	0.72675	0.711832	0.721649	0.738124	0.716993	0.735029	0.774214	0.751324	0.781511	0.726689	0.727638	0.72946	0.758485	0.785763	0.745845
16.1	0.825248	0.788063	0.828147	0.816283	0.801038	0.836307	0.687255	0.679048	0.693829	0.728789	0.710444	0.721882	0.7416	0.715725	0.732449	0.775777	0.751131	0.778898	0.723614	0.73016	0.726204	0.765624	0.78606	0.739048
16.2	0.825465	0.78941	0.82679	0.818286	0.806719	0.837746	0.686015	0.680529	0.693456	0.728093	0.714153	0.725259	0.74116	0.716686	0.738641	0.774981	0.752597	0.783155	0.728717	0.73133	0.729903	0.75786	0.787094	0.742638
16.3	0.822173	0.791452	0.831113	0.816159	0.804481	0.835811	0.687772	0.678893	0.696275	0.735354	0.712772	0.730025	0.745559	0.723432	0.736111	0.779721	0.754723	0.776599	0.729346	0.730905	0.731126	0.762233	0.790925	0.74636
16.4	0.826651	0.790901	0.829429	0.816488	0.80246	0.84025	0.686388	0.685657	0.699089	0.733279	0.714301	0.73396	0.742238	0.720424	0.739381	0.777754	0.755863	0.781307	0.730208	0.734055	0.731783	0.758244	0.787867	0.744453
16.5	0.826332	0.792011	0.832977	0.815504	0.807232	0.83531	0.687251	0.681688	0.695281	0.735193	0.716978	0.7341	0.747284	0.720483	0.740266	0.774553	0.752756	0.780388	0.730236	0.734315	0.73003	0.763199	0.79062	0.745766
16.6	0.82474	0.794968	0.831905	0.817938	0.805096	0.834565	0.691952	0.68414	0.69892	0.735583	0.717473	0.728241	0.743455	0.725065	0.745143	0.778768	0.755181	0.778456	0.733817	0.733906	0.73126	0.766268	0.787667	0.744618
16.7	0.824594	0.794111	0.834065	0.821904	0.804385	0.8361	0.691643	0.686366	0.700072	0.733324	0.717635	0.732862	0.747839	0.724228	0.742458	0.776465	0.75553	0.781561	0.731132	0.739194	0.732519	0.762525	0.787734	0.745092
16.8	0.829511	0.794095	0.83546	0.818719	0.803736	0.833487	0.694919	0.690147	0.704723	0.73687	0.718322	0.734237	0.747737	0.72421	0.744429	0.776188	0.753795	0.786224	0.735245	0.737558	0.735668	0.760341	0.792029	0.745058
16.9	0.827088	0.796091	0.832535	0.820205	0.804658	0.837393	0.69778	0.688862	0.704017	0.736638	0.716989	0.733736	0.748901	0.726178	0.746527	0.780605	0.755949	0.785303	0.733767	0.740582	0.734592	0.761578	0.791678	0.746259
17	0.829839	0.796488	0.833131	0.814623	0.804927	0.834027	0.696838	0.690505	0.706263	0.732965	0.723675	0.737589	0.750485	0.72793	0.746124	0.780422	0.758254	0.787986	0.73736	0.739168	0.73357	0.762219	0.791256	0.751306
17.1	0.833973	0.796035	0.836044	0.815653	0.805211	0.834708	0.69809	0.691417	0.706702	0.736679	0.724638	0.736304	0.753967	0.732321	0.750008	0.783259	0.758444	0.789176	0.737589	0.740649	0.736859	0.762785	0.793363	0.753804
17.2	0.834777	0.799203	0.834263	0.818587	0.807862	0.837377	0.698309	0.696685	0.704603	0.734547	0.723581	0.738315	0.75249	0.729377	0.747369	0.781773	0.757319	0.789198	0.74126	0.740165	0.736215	0.765519	0.791701	0.750216
17.3	0.834537	0.798389	0.83489	0.820619	0.81044	0.838589	0.701862	0.697246	0.707086	0.736754	0.724013	0.738625	0.75534	0.730312	0.746902	0.783444	0.759512	0.789904	0.741154	0.738313	0.736588	0.760537	0.790412	0.752958
17.4	0.834567	0.79934	0.836075	0.818656	0.810912	0.841785	0.700793	0.69899	0.712173	0.738568	0.725604	0.737024	0.752412	0.730333	0.752009	0.776299	0.761565	0.791324	0.739571	0.745927	0.737024	0.762741	0.791563	0.752922
17.5	0.835438	0.798402	0.835489	0.815858	0.805974	0.841051	0.703891	0.694714	0.709575	0.735036	0.726055	0.735139	0.756747	0.73142	0.750349	0.781483	0.76233	0.789069	0.741446	0.743042	0.738707	0.765149	0.794212	0.750068
17.6	0.837728	0.799587	0.838864	0.815046	0.80739	0.844619	0.703723	0.69484	0.709931	0.737378	0.724542	0.742731	0.753704	0.73177	0.75457	0.783635	0.759762	0.784914	0.738766	0.742444	0.740124	0.767969	0.794285	0.752574
17.7	0.83758	0.801465	0.837721	0.816151	0.810558	0.842874	0.705525	0.701437	0.714277	0.737798	0.724604	0.735719	0.755482	0.736314	0.749557	0.78161	0.759911	0.784751	0.745088	0.744008	0.741704	0.76658	0.794324	0.751843
17.8	0.832929	0.803407	0.839656	0.812016	0.811886	0.842081	0.706619	0.699613	0.71523	0.740049	0.728831	0.745741	0.758399	0.736997	0.753445	0.780127	0.761294	0.787224	0.743863	0.743593	0.742545	0.761735	0.791318	0.752798
17.9	0.838659	0.804092	0.839798	0.811058	0.808883	0.846425	0.70878	0.703889	0.717604	0.739325	0.725956	0.742112	0.758701	0.743269	0.749837	0.783809	0.758439	0.787913	0.750693	0.744003	0.745795	0.763928	0.795514	0.7551
18	0.839682	0.804095	0.839883	0.813784	0.807513	0.841617	0.708636	0.706558	0.71489	0.739458	0.728753	0.743504	0.759553	0.736425	0.755105	0.780351	0.762916	0.789632	0.74559	0.748431	0.740708	0.767008	0.795892	0.758996
18.1	0.834648	0.806472	0.839045	0.812303	0.807578	0.846436	0.709897	0.702331	0.717659	0.739107	0.726904	0.742204	0.761716	0.739377	0.756263	0.782198	0.762283	0.792844	0.751298	0.750517	0.746309	0.768778	0.79504	0.755111
18.2	0.836325	0.805439	0.839523	0.815703	0.809003	0.842745	0.713751	0.707702	0.721029	0.739574	0.731704	0.743694	0.761081	0.74067	0.755494	0.780748	0.768034	0.790467	0.749064	0.749229	0.744012	0.765475	0.794277	0.75724
18.3	0.836552	0.805542	0.839985	0.813187	0.808742	0.84426	0.712853	0.706169	0.718854	0.739659	0.730329	0.74303	0.76281	0.738042	0.753628	0.784314	0.76875	0.788851	0.749635	0.750422	0.745655	0.761967	0.796519	0.759004
18.4	0.841295	0.801998	0.841002	0.814292	0.810891	0.846593	0.715004	0.702514	0.718659	0.742463	0.729699	0.740524	0.76346	0.739773	0.758392	0.782817	0.76786	0.792738	0.746934	0.752926	0.743071	0.768599	0.791599	0.758091
18.5	0.841072	0.805357	0.835919	0.81498	0.807625	0.842389	0.711734	0.709242	0.719521	0.740099	0.727579	0.74226	0.762591	0.74143	0.757861	0.784052	0.770188	0.793536	0.749545	0.749731	0.746093	0.764773	0.797045	0.757926
18.6	0.841555	0.806444	0.842954	0.815032	0.808536	0.843871	0.714445	0.706823	0.721024	0.74038	0.731053	0.743641	0.764273	0.74459	0.757049	0.782102	0.765586	0.790296	0.753938	0.751558	0.742382	0.76561	0.79598	0.756856
18.7	0.840778	0.810297	0.841715	0.81164	0.810323	0.84615	0.717087	0.709932	0.719829	0.738063	0.731058	0.743868	0.760701	0.744809	0.75622	0.785076	0.764838	0.794637	0.752289	0.751254	0.746178	0.766801	0.796996	0.756156
18.8	0.838465	0.808667	0.843799	0.815758	0.807385	0.847567	0.718002	0.712614	0.720806	0.739969	0.728988	0.741448	0.764117	0.743962	0.76005	0.783287	0.767404	0.793234	0.752385	0.754183	0.750627	0.770747	0.796452	0.757719
18.9	0.842841	0.807155	0.844204	0.807241	0.808641	0.845075	0.71751	0.710839	0.723213	0.734138	0.728727	0.749068	0.766452	0.748026	0.758448	0.783082	0.769068	0.797728	0.758541	0.752274	0.747891	0.767527	0.797488	0.763042
19	0.845712	0.803064	0.844062	0.813386	0.81024	0.846094	0.720032	0.713907	0.722292	0.739184	0.726914	0.745579	0.765361	0.748634	0.763409	0.78158	0.769224	0.792674	0.752404	0.753526	0.745737	0.763285	0.797228	0.763308
19.1	0.838553	0.808092	0.84125	0.815347	0.807443	0.847752	0.72144	0.712621	0.726046	0.738052	0.734392	0.743859	0.765425	0.744631	0.759818	0.779798	0.765599	0.793578	0.755907	0.75581	0.743269	0.768066	0.79603	0.76102
19.2	0.845589	0.811482	0.844511	0.813568	0.805737	0.844845	0.718596	0.711509	0.726463	0.741438	0.729045	0.744503	0.765665	0.747514	0.757491	0.7829	0.766768	0.795872	0.753652	0.752828	0.748385	0.767814	0.793068	0.763121
19.3	0.841807	0.806395	0.845626	0.817537	0.807502	0.846834	0.720088	0.714041	0.726309	0.741474	0.733775	0.752471	0.769426	0.744765	0.762405	0.783469	0.764573	0.791565	0.753294	0.753345	0.747225	0.764362	0.794483	0.763583
19.4	0.840313	0.804311	0.841837	0.81182	0.810235	0.842297	0.72431	0.714028	0.724353	0.738729	0.732957	0.748771	0.771685	0.745726	0.762025	0.780047	0.769878	0.796785	0.754921	0.7553	0.751534	0.76743	0.794141	0.762115
19.5	0.843622	0.812355	0.840796	0.811585	0.807865	0.842235	0.725249	0.714682	0.724752	0.742402	0.734639	0.75053	0.766765	0.748292	0.760385	0.786827	0.767899	0.793679	0.75778	0.759733	0.750427	0.772275	0.798517	0.76379
19.6	0.84336	0.814269	0.845605	0.813601	0.809315	0.839947	0.725829	0.713914	0.724503	0.741822	0.736442	0.749102	0.767923	0.751182	0.761533	0.780779	0.766281	0.792004	0.75525	0.757044	0.750637	0.766102	0.79748	0.762614
19.7	0.844647	0.811091	0.844895	0.812021	0.810149	0.843067	0.727125	0.715774	0.730478	0.73909	0.734436	0.750138	0.77266	0.746017	0.762051	0.779365	0.770118	0.798599	0.755811	0.7613	0.749886	0.768273	0.794506	0.76484
19.8	0.846769	0.809931	0.845844	0.810533	0.80719	0.84079	0.723974	0.717732	0.728288	0.740764	0.737171	0.746738	0.77256	0.756138	0.761029	0.780135	0.764357	0.797964	0.75868	0.758768	0.75031	0.765362	0.79504	0.762365
19.9	0.846371	0.813272	0.84101	0.811085	0.806341	0.841765	0.726254	0.717232	0.73139	0.738005	0.732832	0.749015	0.773358	0.748727	0.766277	0.781033	0.76874	0.794298	0.758495	0.756292	0.746926	0.768894	0.800645	0.760897
20	0.845337	0.809061	0.843196	0.808746	0.808216	0.841908	0.726354	0.719568	0.731744	0.741761	0.735257	0.750606	0.772872	0.75332	0.758423	0.779807	0.769073	0.796275	0.759626	0.758577	0.752517	0.76919	0.797004	0.765952
20.1	0.844983	0.811624	0.848353	0.81027	0.809458	0.841832	0.728681	0.720032	0.729339	0.740447	0.736184	0.749362	0.772864	0.74891	0.764575	0.782306	0.771256	0.798846	0.758153	0.760362	0.745972	0.764321	0.796993	0.764843
20.2	0.845483	0.809148	0.843579	0.805525	0.806903	0.844042	0.725345	0.720941	0.727173	0.736605	0.73726	0.749866	0.772691	0.752622	0.760875	0.777042	0.76811	0.799487	0.761054	0.757145	0.751026	0.767773	0.796894	0.766512
20.3	0.843789	0.811191	0.842635	0.80721	0.808875	0.845078	0.73064	0.72157	0.732774	0.741504	0.731975	0.749301	0.772045	0.751813	0.762749	0.779696	0.770456	0.800055	0.76256	0.755419	0.749393	0.763017	0.794811	0.763031
20.4	0.843822	0.807026	0.843585	0.807274	0.811683	0.84002	0.726783	0.722958	0.733648	0.73961	0.737478	0.748413	0.774539	0.749258	0.76458	0.778453	0.769375	0.798199	0.762733	0.756959	0.751042	0.768632	0.792079	0.765176
20.5	0.844818	0.81123	0.839054	0.807763	0.807802	0.838068	0.729242	0.722688	0.728366	0.741217	0.733269	0.751939	0.773354	0.755841	0.767807	0.779829	0.768102	0.797487	0.76256	0.75579	0.753285	0.763749	0.798658	0.760082
20.6	0.843206	0.806444	0.843922	0.805572	0.80552	0.840872	0.734326	0.722394	0.727611	0.740969	0.735798	0.749833	0.769743	0.753343	0.760589	0.780508	0.767432	0.798204	0.763014	0.758525	0.752735	0.762633	0.797426	0.763815
20.7	0.845491	0.813115	0.841584	0.80926	0.808622	0.834982	0.730265	0.7208	0.728829	0.741852	0.735319	0.749555	0.774504	0.751473	0.762749	0.776813	0.771152	0.798678	0.764206	0.755867	0.75168	0.763903	0.795733	0.767167
20.8	0.849915	0.808602	0.84175	0.802338	0.807315	0.835061	0.733326	0.718991	0.728759	0.739411	0.733967	0.752611	0.770761	0.752756	0.764425	0.778224	0.769571	0.793861	0.763758	0.757683	0.752818	0.766207	0.799788	0.763538
20.9	0.846517	0.813004	0.840399	0.806025	0.810542	0.833683	0.72855	0.721408	0.730808	0.744534	0.733605	0.75202	0.776119	0.751759	0.761029	0.776884	0.76769	0.797406	0.761527	0.759035	0.756347	0.762876	0.794345	0.763695
21	0.847042	0.807564	0.839946	0.801435	0.803205	0.8334	0.728112	0.721271	0.730719	0.744512	0.734811	0.757738	0.776194	0.753023	0.764841	0.776089	0.77024	0.799792	0.762347	0.765496	0.749927	0.766569	0.794933	0.764283
21.1	0.846667	0.811364	0.842719	0.799215	0.806297	0.834968	0.731569	0.724965	0.734165	0.740063	0.736093	0.75391	0.776683	0.74986	0.767961	0.777906	0.769063	0.795505	0.761499	0.75809	0.753558	0.766538	0.798225	0.766156
21.2	0.84227	0.813574	0.8408	0.800888	0.803322	0.837309	0.730765	0.721974	0.736623	0.741065	0.733775	0.751628	0.776071	0.754342	0.764401	0.778644	0.771282	0.794183	0.76451	0.757778	0.751509	0.760194	0.798504	0.76705
21.3	0.848017	0.812461	0.842785	0.799319	0.804268	0.833123	0.73378	0.719138	0.735773	0.741584	0.736838	0.746943	0.777156	0.756475	0.763267	0.774617	0.771199	0.794561	0.764104	0.758294	0.754109	0.765215	0.794519	0.768005
21.4	0.8443	0.811899	0.84066	0.795842	0.80519	0.835657	0.735757	0.7219	0.735074	0.739681	0.737533	0.751617	0.776177	0.75775	0.766813	0.779293	0.770876	0.798386	0.764248	0.757915	0.753396	0.765411	0.797647	0.767425
21.5	0.843199	0.80895	0.839837	0.798052	0.807497	0.834568	0.732261	0.728293	0.732161	0.737439	0.736098	0.755635	0.77596	0.755275	0.763347	0.774901	0.773884	0.793724	0.764417	0.755877	0.75102	0.763973	0.799166	0.76237
21.6	0.843458	0.811693	0.839027	0.795889	0.80745	0.833969	0.735455	0.725887	0.732494	0.739538	0.7351	0.749239	0.773291	0.750486	0.765431	0.775934	0.768094	0.792872	0.7656	0.759558	0.751867	0.762059	0.795816	0.763045
21.7	0.840947	0.807868	0.842215	0.80217	0.804677	0.832008	0.733928	0.723605	0.732947	0.736839	0.733978	0.745601	0.776908	0.754229	0.768013	0.7741	0.772483	0.797513	0.764383	0.759806	0.749269	0.764359	0.795879	0.765173
21.8	0.84143	0.808968	0.841205	0.797839	0.802343	0.830082	0.73248	0.72565	0.734041	0.745437	0.732603	0.748105	0.779861	0.755558	0.766536	0.774073	0.767742	0.792192	0.763758	0.760318	0.749884	0.767251	0.7966	0.766294
21.9	0.846008	0.810354	0.843468	0.798099	0.802958	0.838379	0.735189	0.727798	0.736738	0.73864	0.73777	0.748617	0.777427	0.75231	0.765351	0.772131	0.773545	0.793808	0.762483	0.760032	0.752371	0.763042	0.792977	0.762636
22	0.844472	0.809746	0.838753	0.792097	0.804651	0.836861	0.731004	0.726711	0.736026	0.735776	0.733988	0.750841	0.775756	0.75597	0.763275	0.774564	0.766698	0.795155	0.764921	0.757655	0.752563	0.761851	0.791795	0.764966
22.1	0.844829	0.807111	0.839177	0.796941	0.800991	0.837094	0.735955	0.724213	0.737411	0.734484	0.738338	0.751799	0.775687	0.754033	0.765271	0.775332	0.765648	0.79166	0.765902	0.760241	0.750252	0.763503	0.795957	0.764218
22.2	0.845339	0.81107	0.838399	0.794826	0.799171	0.837508	0.733124	0.726706	0.73523	0.739408	0.731767	0.752801	0.773114	0.752964	0.763886	0.776755	0.768813	0.793928	0.768963	0.760202	0.753589	0.760683	0.792423	0.763499
22.3	0.843827	0.816054	0.840903	0.795243	0.801463	0.839502	0.734574	0.72275	0.732548	0.734884	0.734647	0.753907	0.774179	0.755754	0.762068	0.773352	0.769868	0.798008	0.767776	0.75749	0.752419	0.759614	0.794332	0.764216
22.4	0.842143	0.804666	0.836822	0.791995	0.801499	0.837791	0.736601	0.725331	0.734305	0.734992	0.735871	0.747343	0.775144	0.752567	0.765869	0.772371	0.764633	0.791915	0.768144	0.757132	0.752042	0.762978	0.794866	0.764372
22.5	0.844404	0.806629	0.838142	0.792406	0.798251	0.836405	0.731494	0.726958	0.733982	0.737287	0.736968	0.747326	0.77604	0.753698	0.763238	0.769535	0.76626	0.790976	0.766565	0.755769	0.748971	0.760755	0.794522	0.762748
22.6	0.841659	0.809604	0.834882	0.791506	0.796035	0.837049	0.733176	0.724437	0.73609	0.733061	0.733655	0.746733	0.776285	0.754414	0.765818	0.769074	0.765977	0.794684	0.771482	0.759824	0.753679	0.760156	0.79347	0.764297
22.7	0.84168	0.806562	0.83294	0.789396	0.79703	0.82785	0.733684	0.728813	0.73625	0.733274	0.737335	0.751014	0.777311	0.75375	0.76179	0.769275	0.764276	0.792503	0.771055	0.757474	0.752034	0.756739	0.794115	0.764073
22.8	0.843103	0.808546	0.836328	0.79258	0.800509	0.832969	0.735928	0.725995	0.734117	0.731749	0.73628	0.7502	0.777025	0.756011	0.762751	0.771095	0.76862	0.792063	0.766479	0.759123	0.750824	0.759211	0.793365	0.764428
22.9	0.841268	0.811093	0.840331	0.787388	0.799358	0.835876	0.734455	0.726278	0.73565	0.730841	0.733374	0.750474	0.774527	0.750641	0.767307	0.772835	0.766091	0.788745	0.767292	0.758868	0.749594	0.761222	0.792709	0.760373
23	0.844829	0.806039	0.834438	0.790133	0.800173	0.833831	0.734788	0.726915	0.736174	0.733785	0.735059	0.750701	0.777542	0.75139	0.763971	0.766815	0.762864	0.794348	0.769968	0.755625	0.750366	0.763213	0.793287	0.762017
23.1	0.845504	0.808126	0.835273	0.791147	0.801997	0.833215	0.73656	0.729132	0.735061	0.730827	0.732527	0.748822	0.775589	0.751797	0.763286	0.76695	0.765518	0.792573	0.766034	0.759587	0.753206	0.756709	0.790399	0.763748
23.2	0.84102	0.806341	0.833314	0.787512	0.79491	0.831983	0.732532	0.726384	0.735298	0.731932	0.731767	0.750004	0.774025	0.750927	0.763773	0.767671	0.763419	0.788969	0.768499	0.75579	0.751425	0.757976	0.788633	0.763053
23.3	0.847846	0.803062	0.834248	0.788504	0.793678	0.829555	0.734841	0.72718	0.734673	0.728222	0.732433	0.749956	0.775519	0.749355	0.761938	0.767005	0.76705	0.792909	0.766259	0.755883	0.752176	0.756894	0.78857	0.764986
23.4	0.844385	0.805362	0.834162	0.786424	0.794251	0.831457	0.737281	0.727054	0.735247	0.730194	0.737028	0.749623	0.777419	0.751836	0.762782	0.765696	0.766977	0.789198	0.764979	0.75461	0.748358	0.756463	0.785487	0.764843
23.5	0.842366	0.807304	0.832981	0.787471	0.796527	0.832193	0.738427	0.726868	0.733568	0.733478	0.730175	0.747239	0.772085	0.751828	0.761434	0.76758	0.763768	0.787711	0.76679	0.753539	0.750925	0.75925	0.785732	0.762575
23.6	0.84097	0.803927	0.832872	0.78195	0.795194	0.827217	0.734909	0.729854	0.734955	0.729106	0.7313	0.749102	0.774383	0.751187	0.760167	0.766665	0.762494	0.792548	0.767163	0.759386	0.747595	0.757059	0.79075	0.763591
23.7	0.839728	0.805885	0.835462	0.784267	0.795152	0.834058	0.734365	0.728071	0.733673	0.729275	0.732821	0.749155	0.773504	0.75368	0.759949	0.766381	0.762205	0.789761	0.769013	0.751207	0.7508	0.755201	0.789982	0.763852
23.8	0.839169	0.802925	0.833777	0.778986	0.794879	0.828446	0.733474	0.727525	0.738143	0.727557	0.733631	0.743364	0.776183	0.753915	0.761443	0.765039	0.764127	0.788619	0.766304	0.756235	0.749617	0.756927	0.790485	0.763642
23.9	0.83999	0.806122	0.830957	0.784894	0.794545	0.831415	0.732407	0.726116	0.737051	0.729432	0.734598	0.74629	0.775444	0.750705	0.757905	0.764428	0.767643	0.789613	0.762816	0.756519	0.749315	0.75783	0.784627	0.764678
24	0.837325	0.805851	0.832422	0.784405	0.79355	0.824257	0.733515	0.727873	0.735072	0.727609	0.729248	0.748032	0.771176	0.752181	0.760476	0.761462	0.757814	0.785236	0.766959	0.75629	0.749646	0.758537	0.788602	0.763244
24.1	0.840518	0.801854	0.82716	0.781447	0.791344	0.824901	0.735464	0.724632	0.730997	0.725808	0.731342	0.74319	0.77406	0.747171	0.759223	0.76584	0.760187	0.787314	0.764838	0.757894	0.744217	0.754005	0.791685	0.764031
24.2	0.837217	0.806302	0.829719	0.783378	0.790347	0.828102	0.736874	0.726508	0.73225	0.726919	0.729571	0.746321	0.7742	0.752233	0.762218	0.760526	0.760939	0.789375	0.765569	0.75197	0.747216	0.75469	0.784382	0.761323
24.3	0.837928	0.802686	0.830558	0.781334	0.791691	0.823117	0.735587	0.728138	0.735716	0.729272	0.730196	0.745722	0.776975	0.749428	0.757411	0.758838	0.761749	0.782197	0.765352	0.755478	0.747996	0.753955	0.786122	0.764378
24.4	0.836225	0.800898	0.829291	0.782154	0.791592	0.828429	0.737128	0.729084	0.732661	0.728493	0.735025	0.742851	0.771112	0.75309	0.757275	0.754858	0.759575	0.783611	0.760739	0.755537	0.747076	0.752099	0.786896	0.75971
24.5	0.833504	0.80335	0.827687	0.777906	0.790159	0.825203	0.735436	0.726503	0.735031	0.727805	0.729764	0.74594	0.771124	0.751455	0.760307	0.760484	0.755775	0.780926	0.763987	0.753031	0.746161	0.752096	0.786677	0.765641
24.6	0.836371	0.803283	0.826391	0.781218	0.785497	0.822828	0.734092	0.726876	0.735765	0.724154	0.729675	0.745139	0.771549	0.750733	0.759211	0.756286	0.762375	0.783345	0.765286	0.754538	0.745626	0.751469	0.783372	0.75901
24.7	0.833889	0.807446	0.827861	0.777691	0.790409	0.82464	0.737981	0.727927	0.734932	0.723947	0.731095	0.7461	0.773918	0.752972	0.758063	0.757617	0.76058	0.787983	0.765433	0.756241	0.749407	0.744954	0.785117	0.759704
24.8	0.836413	0.802464	0.825311	0.771739	0.789852	0.820443	0.734424	0.722778	0.73329	0.721726	0.730282	0.74256	0.773995	0.748881	0.756177	0.754309	0.756978	0.782894	0.764135	0.755434	0.746319	0.747492	0.785437	0.760808
24.9	0.837073	0.800888	0.829174	0.771145	0.789375	0.821089	0.734324	0.724942	0.73357	0.722229	0.727654	0.7431	0.772303	0.753327	0.759083	0.755811	0.759861	0.784311	0.76301	0.749853	0.749971	0.749859	0.786086	0.759284
25	0.833693	0.800834	0.822126	0.777586	0.78757	0.818541	0.735289	0.724524	0.734193	0.725226	0.726641	0.742022	0.773347	0.746818	0.75695	0.758377	0.759726	0.780088	0.762691	0.749881	0.748195	0.750445	0.784135	0.760474
25.1	0.829018	0.800066	0.820275	0.771471	0.78699	0.820504	0.73552	0.726078	0.733938	0.722005	0.731892	0.742036	0.770514	0.749255	0.756888	0.7563	0.758796	0.778501	0.762956	0.755919	0.744723	0.750323	0.784265	0.762499
25.2	0.83481	0.801274	0.823161	0.776202	0.784536	0.818429	0.732713	0.72454	0.732373	0.72314	0.727125	0.743193	0.772881	0.747555	0.757277	0.752994	0.75442	0.7791	0.762072	0.754656	0.746679	0.7485	0.782835	0.759923
25.3	0.831185	0.800367	0.82195	0.772148	0.785219	0.817466	0.734707	0.726492	0.733323	0.72282	0.727735	0.739802	0.772164	0.74672	0.751513	0.75314	0.75752	0.777618	0.764558	0.749513	0.747317	0.748575	0.782736	0.756304
25.4	0.830457	0.798211	0.821003	0.77354	0.785307	0.815119	0.738437	0.729671	0.730211	0.72287	0.731678	0.743711	0.770697	0.750216	0.75342	0.751966	0.756145	0.776171	0.7674	0.749345	0.746099	0.747213	0.781903	0.760886
25.5	0.829918	0.795579	0.823149	0.768231	0.782981	0.815038	0.735241	0.72726	0.730814	0.716388	0.727258	0.739732	0.7753	0.748639	0.756786	0.752179	0.757608	0.777901	0.7621	0.752333	0.743935	0.748158	0.777056	0.761085
25.6	0.828793	0.800061	0.821304	0.767069	0.783411	0.817244	0.735201	0.726894	0.729059	0.718525	0.725516	0.739491	0.767005	0.743956	0.757037	0.750746	0.755934	0.777526	0.764462	0.75383	0.742261	0.744515	0.778012	0.755613
25.7	0.831141	0.799448	0.819173	0.772018	0.789709	0.814587	0.727641	0.727932	0.729878	0.717222	0.724925	0.739037	0.769597	0.751648	0.754196	0.748834	0.756572	0.772838	0.760178	0.750942	0.743643	0.745907	0.779332	0.759735
25.8	0.834721	0.796135	0.819526	0.767676	0.780619	0.81634	0.735582	0.726451	0.731324	0.71602	0.727868	0.73662	0.766169	0.744683	0.753716	0.75192	0.760007	0.779296	0.761222	0.748966	0.741054	0.747523	0.781301	0.757318
25.9	0.830672	0.797315	0.818761	0.771093	0.785547	0.812226	0.734332	0.72396	0.733274	0.719188	0.726933	0.738169	0.765173	0.747833	0.748821	0.745421	0.758007	0.779708	0.763962	0.752967	0.74517	0.748061	0.780981	0.754753
26	0.830541	0.795429	0.821211	0.763586	0.782242	0.818981	0.73104	0.722672	0.728672	0.719997	0.723516	0.734122	0.766761	0.749577	0.750937	0.749254	0.756845	0.777072	0.762877	0.750764	0.743086	0.744747	0.778249	0.75242
26.1	0.826961	0.795654	0.818498	0.767149	0.780166	0.812047	0.733053	0.722515	0.729647	0.718086	0.726951	0.73685	0.765817	0.746975	0.75361	0.739784	0.755027	0.775157	0.760466	0.751468	0.742296	0.747536	0.779648	0.75594
26.2	0.825446	0.792766	0.817471	0.762219	0.783744	0.81459	0.734259	0.725124	0.729185	0.717876	0.725037	0.736802	0.770653	0.743864	0.752186	0.749699	0.752506	0.772258	0.759787	0.75171	0.741366	0.744009	0.779845	0.755876
26.3	0.826036	0.790842	0.818864	0.762266	0.779965	0.812355	0.73228	0.7238	0.728203	0.71681	0.727118	0.73855	0.762272	0.745667	0.749847	0.746821	0.751722	0.773272	0.761558	0.748634	0.743849	0.741916	0.781171	0.753098
26.4	0.825725	0.793956	0.816299	0.761647	0.776827	0.815055	0.732755	0.726291	0.732482	0.717255	0.726063	0.740927	0.763881	0.745494	0.748924	0.744269	0.752746	0.773827	0.759543	0.74984	0.740967	0.741032	0.777007	0.752009
26.5	0.8263	0.792653	0.814509	0.761735	0.776139	0.810022	0.730915	0.722376	0.729427	0.714131	0.723945	0.738522	0.765261	0.743454	0.749401	0.746595	0.752621	0.772847	0.758161	0.747114	0.747805	0.741156	0.770894	0.752093
26.6	0.824096	0.795553	0.814005	0.758708	0.774306	0.812954	0.727627	0.725416	0.728483	0.71459	0.725552	0.734677	0.764302	0.741885	0.747786	0.742681	0.749771	0.773269	0.759605	0.74892	0.742243	0.741167	0.779835	0.751723
26.7	0.822681	0.792083	0.814555	0.760716	0.775689	0.810554	0.731492	0.722631	0.733284	0.713565	0.721536	0.734313	0.761074	0.74299	0.747076	0.743131	0.749337	0.773062	0.756532	0.748753	0.739363	0.738295	0.772941	0.751561
26.8	0.820318	0.790674	0.814133	0.751138	0.772355	0.812162	0.72939	0.725913	0.727695	0.710414	0.720135	0.73683	0.760649	0.741847	0.745583	0.742703	0.748909	0.768399	0.758157	0.746197	0.738548	0.74125	0.776546	0.75538
26.9	0.819193	0.793379	0.810111	0.756709	0.777718	0.808	0.73	0.72166	0.729279	0.708494	0.723094	0.733688	0.763696	0.741772	0.745277	0.743081	0.752832	0.76971	0.756526	0.743269	0.742382	0.74038	0.774814	0.745918
27	0.819822	0.792372	0.811249	0.756667	0.771217	0.806555	0.728427	0.720406	0.724923	0.709582	0.722979	0.734453	0.758061	0.741553	0.748683	0.740173	0.74904	0.769377	0.758926	0.74169	0.738264	0.736022	0.77255	0.755235
27.1	0.820149	0.790803	0.808466	0.753814	0.774113	0.805897	0.729048	0.721856	0.726179	0.709502	0.718734	0.734436	0.760714	0.742846	0.739657	0.740264	0.749204	0.770141	0.758247	0.746543	0.737579	0.736563	0.772923	0.74764
27.2	0.81913	0.790319	0.808128	0.752342	0.774058	0.803287	0.72921	0.722345	0.727634	0.710673	0.71976	0.735562	0.760962	0.74024	0.744106	0.740165	0.749334	0.768702	0.758411	0.745711	0.737246	0.736572	0.774035	0.747861
27.3	0.818089	0.78976	0.807289	0.753361	0.769204	0.799044	0.728348	0.723692	0.727837	0.709486	0.721554	0.733851	0.760383	0.738169	0.744205	0.737773	0.742679	0.768332	0.758759	0.744263	0.737516	0.736058	0.770936	0.750071
27.4	0.815411	0.790043	0.812395	0.75008	0.776069	0.801537	0.728983	0.719355	0.725038	0.706864	0.71521	0.728734	0.759439	0.736685	0.743549	0.740626	0.747667	0.765991	0.758999	0.742174	0.735193	0.737025	0.775439	0.7496
27.5	0.814826	0.787733	0.806756	0.752082	0.771626	0.800347	0.730167	0.721977	0.723886	0.709781	0.720101	0.736405	0.757172	0.738534	0.746961	0.732351	0.745448	0.764291	0.756265	0.741177	0.733971	0.737792	0.763846	0.752109
27.6	0.818274	0.79011	0.806658	0.748428	0.77367	0.802679	0.725779	0.719898	0.723542	0.707447	0.716351	0.730762	0.757232	0.73551	0.742308	0.735425	0.746474	0.763426	0.756561	0.743215	0.739311	0.735246	0.766729	0.746716
27.7	0.813075	0.785363	0.807647	0.752745	0.767597	0.800484	0.726072	0.720305	0.726698	0.704768	0.717689	0.73142	0.753483	0.735773	0.743255	0.738229	0.741354	0.769634	0.756628	0.739449	0.735452	0.734282	0.768412	0.74806
27.8	0.815367	0.785111	0.805705	0.744233	0.768748	0.797627	0.727352	0.72063	0.724472	0.704928	0.718093	0.733358	0.757517	0.735103	0.743164	0.732619	0.74058	0.763308	0.755469	0.739286	0.734885	0.732293	0.771756	0.749905
27.9	0.816461	0.785675	0.802782	0.747349	0.767003	0.795578	0.724891	0.716194	0.724293	0.704655	0.719226	0.73058	0.759562	0.739011	0.742271	0.730573	0.742372	0.763311	0.75793	0.739773	0.732898	0.73563	0.764987	0.748488
28	0.809558	0.783663	0.804872	0.74707	0.770224	0.799686	0.725687	0.719043	0.721111	0.703373	0.716569	0.736253	0.755365	0.738509	0.744454	0.735486	0.742432	0.763339	0.758734	0.738318	0.735378	0.734453	0.766763	0.745551
28.1	0.812498	0.783016	0.806763	0.745639	0.768563	0.796883	0.726883	0.714347	0.721629	0.702095	0.712548	0.729381	0.755638	0.736368	0.739694	0.73173	0.73957	0.762717	0.75276	0.738511	0.73723	0.73176	0.767586	0.744607
28.2	0.811146	0.779361	0.803702	0.750619	0.765432	0.793785	0.728469	0.717451	0.721516	0.702592	0.713749	0.728827	0.751198	0.735119	0.739449	0.732873	0.740664	0.761491	0.752358	0.73543	0.729697	0.72928	0.7708	0.748052
28.3	0.806999	0.784964	0.80429	0.744269	0.763739	0.791945	0.730333	0.720769	0.725188	0.705442	0.716064	0.730014	0.754611	0.733287	0.738145	0.728982	0.739434	0.759136	0.750975	0.736262	0.72974	0.73073	0.765331	0.744848
28.4	0.811633	0.783717	0.803307	0.743968	0.766232	0.796765	0.72393	0.717773	0.722783	0.698477	0.71522	0.723268	0.754017	0.731979	0.74156	0.729465	0.741013	0.760973	0.752873	0.737702	0.734687	0.731164	0.763682	0.747906
28.5	0.807516	0.782888	0.796866	0.745495	0.763562	0.793203	0.723055	0.721894	0.720566	0.704337	0.717346	0.726435	0.749656	0.730493	0.738943	0.732177	0.740658	0.756996	0.752339	0.737272	0.728948	0.728341	0.764547	0.74694
28.6	0.808522	0.777478	0.798714	0.737132	0.766177	0.794334	0.726001	0.717948	0.72245	0.693475	0.713043	0.730291	0.749466	0.732697	0.737668	0.729283	0.742935	0.756386	0.750068	0.73398	0.728549	0.727896	0.765005	0.743409
28.7	0.803815	0.778591	0.798512	0.745785	0.763015	0.793564	0.723584	0.717181	0.721341	0.69949	0.714322	0.727508	0.751348	0.735047	0.737057	0.727239	0.735663	0.758338	0.755119	0.735521	0.731174	0.729733	0.759445	0.742983
28.8	0.803746	0.77981	0.799491	0.739878	0.763935	0.793729	0.723609	0.714479	0.720337	0.701106	0.711741	0.730095	0.748018	0.730091	0.738918	0.727739	0.734311	0.757707	0.746726	0.731528	0.732054	0.727129	0.765544	0.742504
28.9	0.80826	0.77973	0.798722	0.737052	0.760588	0.790369	0.719463	0.715893	0.716738	0.700076	0.710991	0.729208	0.750152	0.729939	0.737863	0.726723	0.738629	0.75293	0.750454	0.7339	0.728825	0.729711	0.766719	0.741902
29	0.806447	0.781754	0.795729	0.74022	0.760426	0.784115	0.723255	0.71486	0.722006	0.699092	0.71421	0.725273	0.747797	0.729624	0.738149	0.724179	0.737325	0.754943	0.750829	0.731595	0.729121	0.725621	0.761898	0.741118
29.1	0.805161	0.776786	0.795373	0.738057	0.760752	0.785443	0.72242	0.715573	0.719332	0.699846	0.713085	0.727939	0.747978	0.727559	0.731423	0.722196	0.736478	0.755943	0.749026	0.731703	0.731762	0.726109	0.762265	0.740555
29.2	0.801511	0.773313	0.797677	0.734185	0.760822	0.784239	0.725385	0.715761	0.715057	0.697466	0.710264	0.723512	0.744807	0.72812	0.732751	0.724077	0.73747	0.753896	0.748026	0.733231	0.729506	0.726863	0.758338	0.744027
29.3	0.800023	0.775899	0.798236	0.738773	0.759109	0.787868	0.72183	0.716323	0.718062	0.69538	0.707912	0.7228	0.743484	0.727213	0.734547	0.724963	0.734988	0.752992	0.747393	0.732545	0.727228	0.723643	0.758278	0.741457
29.4	0.802375	0.7737	0.793931	0.733475	0.757796	0.786093	0.721205	0.710223	0.716369	0.697419	0.709608	0.722291	0.746449	0.72617	0.732449	0.722168	0.730016	0.749802	0.74843	0.73381	0.725025	0.726717	0.760018	0.741249
29.5	0.803019	0.771551	0.792672	0.73513	0.76208	0.780483	0.722211	0.711099	0.715991	0.694974	0.708066	0.721666	0.74662	0.726683	0.729308	0.724356	0.73485	0.755422	0.749791	0.732762	0.725963	0.723049	0.760963	0.742092
29.6	0.799583	0.77584	0.795048	0.7331	0.756478	0.78479	0.718844	0.712361	0.714387	0.696714	0.706362	0.723399	0.740987	0.728908	0.733422	0.721969	0.733749	0.751202	0.745061	0.732788	0.724818	0.721541	0.758314	0.740653
29.7	0.795997	0.771273	0.791314	0.73044	0.754626	0.781407	0.719002	0.711457	0.714407	0.695505	0.704172	0.721394	0.747307	0.722762	0.731293	0.72084	0.734249	0.753944	0.744776	0.734537	0.725317	0.721489	0.760966	0.741238
29.8	0.799369	0.769844	0.789362	0.734025	0.751738	0.78003	0.718136	0.710661	0.711719	0.689263	0.706313	0.726701	0.744909	0.723873	0.731877	0.722411	0.729186	0.748844	0.74912	0.72751	0.724918	0.72382	0.755199	0.736363
29.9	0.79517	0.769779	0.787785	0.729465	0.755762	0.782172	0.714147	0.711761	0.712708	0.696474	0.708782	0.720711	0.743138	0.722654	0.732758	0.717597	0.730782	0.746665	0.740064	0.728339	0.723964	0.722839	0.756692	0.739603
