# Supplementary material for: Towards a molecular mechanism underlying mitochondrial protein import through the TOM and TIM23 complexes
Source: eLife. 2022 Jun 8;11:e75426. doi: 10.7554/eLife.75426 (PMC9255969; doi:10.7554/eLife.75426)
Supplement: Figure 3—source data 2. [file elife-75426-fig3-data2.xlsx]

## Sheet: secondary data
	technical replicate =1									technical replicate =2
	biol n=1			biol n=2			biol n=3			biol n=1			biol n=2			biol n=3			A	k1	k2	A	k1	k2	A	k1	k2
PCP	A	k1	k2	A	k1	k2	A	k1	k2	A	k1	k2	A	k1	k2	A	k1	k2	biol 1 ave	biol 1 ave	biol 1 ave	biol 2 ave	biol 2 ave	biol 2 ave	biol 3 ave	biol 3 ave	biol 3 ave
L	0.998571	1.79831	0.382129	1.01923	4.66621	0.408316	1.02424	3.67399	0.370233	1.00449	1.64811	0.332749	1.01257	2.22453	0.328102	1.0147	1.92769	0.311709	1.00153	1.72321	0.357439	1.0159	3.44537	0.368209	1.01947	2.80084	0.340971
DL	1.00567	1.97037	0.343896	0.981917	2.83391	0.331256	0.955783	1.96554	0.29153	0.944948	1.3713	0.263223	0.937393	1.22975	0.256136	0.943109	1.469	0.242038	0.97531	1.67084	0.303559	0.959655	2.03183	0.293696	0.949446	1.71727	0.266784
DDL	0.943663	1.34749	0.321231	0.887385	1.24654	0.271472	0.881833	1.1958	0.264165	0.879625	0.8635	0.237423	0.880367	0.805029	0.230254	0.868853	0.871203	0.22103	0.911644	1.1055	0.279327	0.883876	1.02578	0.250863	0.875343	1.0335	0.242597
DDDL	0.852892	0.445615	0.305024	0.840536	0.612976	0.241777	0.756184	0.387611	0.242975	0.808305	0.276031	0.276031	0.805745	0.277343	0.277343	0.795616	0.274456	0.274456	0.830598	0.360823	0.290528	0.82314	0.445159	0.25956	0.7759	0.331033	0.258715
LDDD	0.847988	0.345124	0.345124	0.827576	0.574442	0.239222	0.865985	0.483322	0.252755	0.86963	0.372783	0.237775	0.825679	0.369308	0.227188	0.847163	0.289699	0.289699	0.858809	0.358954	0.291449	0.826627	0.471875	0.233205	0.856574	0.386511	0.271227
DLDD	0.799414	0.271653	0.271653	0.75208	0.276208	0.276207	0.788663	0.266719	0.266719	0.79424	0.221662	0.221662	0.741473	0.224427	0.224427	0.786857	0.212743	0.212743	0.796827	0.246657	0.246657	0.746776	0.250317	0.250317	0.78776	0.239731	0.239731
DDLD	0.853392	0.282553	0.282553	0.794832	0.285719	0.285719	0.842898	0.280052	0.280052	0.828265	0.240082	0.240082	0.798515	0.236998	0.236998	0.837723	0.232818	0.232818	0.840829	0.261317	0.261317	0.796674	0.261359	0.261359	0.840311	0.256435	0.256435
DDDL	0.806016	0.31401	0.31401	0.80966	0.316015	0.316015	0.778569	0.294243	0.294244	0.794355	0.261289	0.261288	0.793602	0.253339	0.253339	0.791887	0.248473	0.248473	0.800185	0.287649	0.287649	0.801631	0.284677	0.284677	0.785228	0.271358	0.271358
