# Supplementary material for: Towards a molecular mechanism underlying mitochondrial protein import through the TOM and TIM23 complexes
Source: eLife. 2022 Jun 8;11:e75426. doi: 10.7554/eLife.75426 (PMC9255969; doi:10.7554/eLife.75426)
Supplement: Figure 3—source data 3. [file elife-75426-fig3-data3.xlsx]

## Sheet: tertiary data
PCP	length (aa)	len			seq
L	129	0.580313	0.290245	0.357036	2.78587	2.11921	2.58725
DL	235	0.598502	0.492167	0.582319	4.05421	3.99493	4.17134
DDL	341	0.904571	0.974865	0.967587	3.82677	3.82615	3.89962
DDDL	447	2.77144	2.24639	3.02085	3.47646	3.51275	3.68517
