# Supplementary material for: Towards a molecular mechanism underlying mitochondrial protein import through the TOM and TIM23 complexes
Source: eLife. 2022 Jun 8;11:e75426. doi: 10.7554/eLife.75426 (PMC9255969; doi:10.7554/eLife.75426)
Supplement: Figure 3—source data 4. [file elife-75426-fig3-data4.xlsx]

## Sheet: length variants
	amplitude		k1		k2
	mean	SEM	mean	SEM	mean	SEM
129	1.70936	2.27717	9.96533	13.929	0.681143	10.6472
235	25.6764	3.38036	132.142	57.1734	28.0098	5.45882
341	59.387	5.55751	385.234	36.9324	38.8862	12.6545
447	98.1348	10.2189	236.654	88.4918	92.737	21.3093

## Sheet: position variants
	amplitude		k1		k2
	mean	SEM	mean	SEM	mean	SEM
129	59.8315	3.33501	327.778	54.8417	104.049	14.818
235	136.243	8.73347	220.476	29.5586	266.424	20.4691
341	162.741	16.6202	172.277	47.0128	249.544	30.315
447	129.144	8.08571	1461.35	390.022	102.044	14.476
