# Supplementary material for: Towards a molecular mechanism underlying mitochondrial protein import through the TOM and TIM23 complexes
Source: eLife. 2022 Jun 8;11:e75426. doi: 10.7554/eLife.75426 (PMC9255969; doi:10.7554/eLife.75426)
Supplement: Figure 4—figure supplement 1—source data 1. [file elife-75426-fig4-figsupp1-data1.xlsx]

## Sheet: left graph
val (nM)	0			0.5			1			1.5			2			3			5			10
Time (min)	n1	n2	n3	n1	n2	n3	n1	n2	n3	n1	n2	n3	n1	n2	n3	n1	n2	n3	n1	n2	n3	n1	n2	n3
0.066667	1.36876	1.38234	1.34928	1.35631	1.32958	1.34797	1.38525	1.4119	1.33754	1.37959	1.3971	1.35483	1.36297	1.37777	1.3299	1.40285	1.36502	1.29575	1.40764	1.38858	1.3187	1.41107	1.3739	1.33761
0.166667	1.35547	1.36678	1.34103	1.34665	1.33253	1.32321	1.37388	1.37779	1.31326	1.35075	1.3703	1.33271	1.35903	1.35849	1.32393	1.38689	1.35149	1.3117	1.38061	1.37376	1.32064	1.39046	1.35067	1.33299
0.266667	1.332	1.36454	1.34326	1.34947	1.30092	1.31267	1.35446	1.36136	1.30308	1.34493	1.36294	1.3418	1.34398	1.34471	1.31147	1.35106	1.34853	1.30328	1.33324	1.35069	1.28956	1.36362	1.35454	1.33445
0.366667	1.32412	1.35192	1.31991	1.32375	1.29952	1.31003	1.33647	1.36081	1.32788	1.30791	1.34877	1.33596	1.33189	1.35173	1.30651	1.34183	1.34726	1.30238	1.3285	1.35426	1.30323	1.36085	1.34196	1.32455
0.466667	1.29137	1.32486	1.32495	1.29669	1.29615	1.32689	1.3205	1.34507	1.32436	1.2989	1.3528	1.34465	1.32218	1.34016	1.29926	1.32279	1.33852	1.28962	1.2984	1.35728	1.29794	1.34439	1.34113	1.32218
0.566667	1.27978	1.33958	1.32928	1.27038	1.31132	1.32426	1.30395	1.34024	1.31601	1.27298	1.34821	1.33528	1.32134	1.32928	1.28998	1.30655	1.34007	1.29281	1.28893	1.33203	1.30091	1.33678	1.33767	1.326
0.666667	1.26835	1.31869	1.32942	1.27796	1.29053	1.31952	1.2887	1.33803	1.31235	1.25509	1.35266	1.34031	1.28477	1.3443	1.30664	1.29578	1.34134	1.28515	1.27918	1.33985	1.3138	1.31714	1.34279	1.31928
0.766667	1.25136	1.31729	1.32047	1.25878	1.30499	1.32531	1.27489	1.34176	1.31731	1.24067	1.34349	1.3494	1.28491	1.33782	1.2957	1.29536	1.3412	1.284	1.25089	1.33916	1.31445	1.29542	1.35537	1.32297
0.866667	1.23113	1.31939	1.33166	1.24853	1.29783	1.31978	1.25863	1.35846	1.3301	1.23846	1.34641	1.33338	1.27057	1.35036	1.29049	1.26933	1.3357	1.28681	1.24393	1.34109	1.30168	1.29832	1.34901	1.31097
0.966667	1.22155	1.3264	1.33026	1.23916	1.30106	1.32492	1.25632	1.34673	1.3194	1.22459	1.35044	1.34505	1.25355	1.35105	1.29646	1.25253	1.33203	1.29702	1.22958	1.35015	1.31574	1.27522	1.35689	1.32719
1.06667	1.20471	1.31575	1.33502	1.22786	1.29488	1.32334	1.24337	1.34327	1.31731	1.21308	1.3571	1.3555	1.2288	1.33933	1.29634	1.24245	1.33683	1.28145	1.22567	1.33875	1.30852	1.26097	1.35011	1.31149
1.16667	1.2044	1.32332	1.32928	1.22117	1.31117	1.324	1.22783	1.35432	1.31979	1.19076	1.34877	1.3418	1.22176	1.34223	1.30181	1.23783	1.33429	1.28936	1.20073	1.34781	1.30452	1.24008	1.36187	1.31189
1.26667	1.19853	1.31981	1.32844	1.2066	1.31033	1.3207	1.22193	1.33886	1.31601	1.17551	1.35057	1.33623	1.19757	1.34967	1.30384	1.21376	1.34218	1.29409	1.1985	1.34617	1.30839	1.22473	1.34306	1.31783
1.36667	1.18262	1.32122	1.3125	1.18267	1.30036	1.31174	1.20409	1.33472	1.31235	1.17912	1.34724	1.33841	1.19715	1.36386	1.29952	1.2083	1.3381	1.29664	1.19335	1.35234	1.31522	1.22127	1.36381	1.32442
1.46667	1.16192	1.32598	1.31824	1.19129	1.29713	1.32268	1.19862	1.35239	1.32188	1.16747	1.3503	1.33718	1.17971	1.35105	1.30486	1.20732	1.33542	1.29804	1.18137	1.34013	1.31754	1.21006	1.35288	1.32785
1.56667	1.15775	1.30902	1.32928	1.16289	1.31117	1.30911	1.18538	1.34728	1.31157	1.16747	1.33571	1.32945	1.17662	1.34746	1.28782	1.19598	1.32541	1.28681	1.18025	1.35344	1.31084	1.19443	1.35634	1.32231
1.66667	1.15992	1.32332	1.32565	1.16155	1.30893	1.3211	1.16725	1.34935	1.31783	1.14016	1.36016	1.32999	1.18379	1.34099	1.30066	1.18745	1.3364	1.3006	1.17607	1.35207	1.31303	1.1936	1.35758	1.31492
1.76667	1.13814	1.32192	1.31907	1.13702	1.30612	1.31517	1.17517	1.35115	1.32919	1.13864	1.35085	1.33637	1.16115	1.35325	1.30765	1.1901	1.33542	1.29562	1.16339	1.35179	1.31651	1.17243	1.35537	1.32389
1.86667	1.1301	1.31042	1.32145	1.14639	1.29362	1.32228	1.16409	1.35943	1.3207	1.13032	1.33363	1.31968	1.14765	1.34774	1.30956	1.16645	1.34895	1.29166	1.16604	1.35221	1.31071	1.17437	1.3468	1.314
1.96667	1.12763	1.31603	1.32257	1.13182	1.30275	1.32465	1.15445	1.33761	1.31848	1.11451	1.35307	1.3304	1.15102	1.34388	1.30244	1.14994	1.33824	1.30366	1.1489	1.35042	1.31058	1.17811	1.34776	1.31228
2.06667	1.12593	1.30537	1.3139	1.13271	1.30148	1.32334	1.14596	1.34976	1.31809	1.12172	1.33571	1.3232	1.134	1.34278	1.31172	1.15749	1.34218	1.28758	1.14556	1.35124	1.31097	1.16676	1.35482	1.32495
2.26667
2.51667	1.01672	1.01685	1.02755	1.0172	1.01365	1.0479	1.02912	1.01094	1.03761	1.02052	1.04085	1.03821	1.02247	1.02286	1.02578	1.01753	1.01355	1.03432	1.01919	1.03196	1.05099	1.02552	1.0261	1.04532
2.61667	1.02105	1.02568	1.02937	1.02091	1.01436	1.03103	1.0153	1.0224	1.02182	1.00873	1.01099	1.03264	1.01614	1.01735	1.02781	1.02103	1.00988	1.03062	1.01529	1.02483	1.0212	1.0168	1.0138	1.0316
2.71667	1.02167	1.01138	1.04586	1.01036	1.01913	1.01878	1.02509	1.01509	1.02508	1.00943	1.01821	1.03726	1.01938	1.01501	1.01497	1.01109	1.00565	1.01875	1.00832	1.02153	1.02378	1.00878	1.00992	1.02289
2.81667	1.0246	1.02358	1.03188	1.0111	1.02503	1.01088	1.01962	1.02102	1.00551	1.01261	1.02251	1.03319	1.00742	1.02727	1.02171	1.01487	1.02694	1.02335	1.01041	1.01961	1.02288	1.00131	1.01366	1.01432
2.91667	1.02167	1.02105	1.02783	1.00099	1.01632	1.00851	1.0166	1.01605	1.00746	1.00943	1.01765	1.01134	1.02388	1.0179	1.01307	1.01025	1.0189	1.01263	1.00902	1.0229	1.01798	1.00822	1.02431	1.02474
3.01667	1.01023	1.01475	1.02335	1.01095	1.02812	1.0064	1.02955	1.03027	1.01347	1.00568	1.02126	1.02043	1.01108	1.02066	1.01535	1.00577	1.01792	1.01964	1.01055	1.01865	1.02133	1.00352	1.02154	1.01656
3.11667	1.00019	1.00213	1.02168	1.01601	1.02503	1.0122	1.01084	1.01729	1.01777	1.01164	1.00821	1.01527	1.01108	1.02107	1.01485	1.00591	1.02877	1.01645	1.01821	1.02222	1.00457	1.00892	1.01241	1.01656
3.21667	1.00823	1.00381	1.0144	1.01229	1.01787	1.01299	1.01286	1.01729	1.00303	1.0097	1.0096	1.01527	1.01389	1.01266	1.01586	1.00101	1.00748	1.01684	1.00874	1.01549	1.01514	1.00698	1.02541	1.01181
3.31667	1.00421	1.01517	1.01343	1.01184	1.00958	1.01378	1.02005	1.0155	1.00303	1.02759	1.02001	1.02179	1.00771	1.01115	1.024	1.00913	1.01044	1.00777	1.01375	1.02661	1.01063	1.00311	1.00896	1.00561
3.41667	1.01039	1.0097	1.00504	1.01333	1.01098	1.00495	1.00509	1.00169	1.00485	1.01372	1.0089	1.00944	1.00728	1.0179	1.01434	1.00605	1.01143	1.01352	1.01125	1.02181	1.02275	1.00961	1.00744	1.00456
3.51667	1.00406	1.00269	1.01986	1.01868	1.02082	1.01246	1.00854	1.00846	1.01503	1.00901	1.00974	1.01419	1.01727	1.02327	1.00328	1.00451	1.0127	1.0125	1.01111	1.01453	1.0065	1.01085	1.0091	1.00627
3.61667	1.01147	1.00395	1.0144	1.00382	1.00902	1.00166	1.01372	1.01923	0.996891	1.01455	1.00876	1.01486	1.007	1.00881	1.01586	1.00703	1.00692	1.00509	1.02128	1.00849	1.00547	1.01168	1.01034	1.01604
3.71667	0.994015	1.00451	1.01273	0.999653	1.01717	1.01417	1.00034	1.00542	1.00472	1.01178	1.01085	1.01202	1.00475	1.00192	1.0048	1.00759	1.00607	1.01033	1.00985	1.01179	1.0007	0.998264	1.01062	1.0043
3.81667	1.00714	0.999184	1.01161	1.00129	1.00199	1.0068	0.996885	0.995617	1.00107	1.00748	1.00349	1.01337	1.00405	1.01087	1.01078	1.00479	1.0048	1.00956	1.00581	1.017	1.01321	1.00103	1.0149	1.01155
3.91667	1.01008	1.00507	1.01021	1.00069	1.00284	1.00363	1.00998	1.00418	1.00655	1.00235	1.00099	1.00102	1.00869	1.00674	1.00302	1.00004	1.00565	0.99769	1.00846	1.00259	0.998764	0.991762	1.01241	0.997833
4.01667	0.997413	1.00073	1.00182	0.996977	1.0048	1.00798	1.00566	1.00583	1.0132	0.996254	1.00724	1.00347	1.00799	0.996545	1.00658	1.00116	0.997473	1.0088	1.00651	1.017	1.01527	1.00034	1.00896	1.00496
4.11667	1.00174	0.997641	1.00378	1.01051	1.00199	1.00258	0.998612	1.00362	0.99428	1.0061	1.00279	1.00944	0.999266	1.00247	0.996156	1.01473	1.00368	1.01109	0.993692	1.00163	0.997087	1.00297	1.00508	1.01102
4.21667	0.99834	0.9968	0.998185	0.998315	1.00031	1.00258	1.00178	1.00086	1.00055	1.00291	0.999736	1.00496	1.0063	1.00219	1.01281	0.995697	1.00015	1.00254	1.00205	0.991196	1.0025	1.00767	0.996372	0.999547
4.31667	1.00251	1.00423	1.00574	0.990436	1.00916	1.01141	1.0035	0.998655	1.00133	0.998056	1.00015	1.00699	1.01347	0.998336	1.00518	0.999336	0.989014	0.999605	0.99829	0.999981	0.997603	0.999924	1.00301	1.00759
4.41667	0.999421	0.992314	1.0158	1.00025	0.99792	1.00153	1.00019	0.995617	1.00289	1.00513	1.00071	0.998986	0.993922	0.982216	1.00391	0.993317	0.997614	0.994116	1.00456	1.00835	1.00444	1.00324	0.997478	1.00416
4.51667	0.998186	1.00241	1.00699	1.00218	0.999325	1.00825	1.00221	1.00956	1.00524	1.00055	0.999597	1.00116	0.997719	1.00467	0.993104	0.999196	1.00579	1.00012	1.00052	1.00931	1.0074	1.01072	0.999553	1.00311
4.61667	1.00977	0.995398	0.993012	0.997423	0.989071	1.00166	1.0012	0.99396	0.996499	1.00111	0.995291	1.00075	1.00475	0.996269	0.998444	0.997516	0.988873	0.999732	0.998568	0.998746	1.0025	1.00338	1.00066	0.992293
4.71667	0.99417	0.990491	0.999024	1.00025	1.00452	0.998365	1.00638	0.993546	1.00642	0.998611	1.00335	0.994643	1.00981	1.00867	0.995774	1.00101	1.00213	0.997179	0.993831	1.00163	1.00444	0.996604	1.00218	0.995722
4.81667	1.00004	0.992314	0.997066	0.99222	1.00031	0.986246	0.998036	1.00998	0.991148	0.99057	0.995708	1.00211	0.99575	0.984971	1.00455	1.00941	0.992257	1.00318	0.999962	0.993941	0.988963	0.994114	1.00038	0.999415
4.91667	0.996178	0.98965	0.993151	1.00248	0.997078	1.00561	0.99818	0.996722	0.997282	0.998056	0.996819	0.986772	0.99575	1.00274	0.998699	0.999896	0.990424	0.993095	1.00372	0.990373	0.994637	1.00338	1.00315	0.998096
5.01667	0.992161	0.983622	0.98658	0.995193	0.995111	1.00271	0.998612	1.00073	0.998587	0.996254	0.990013	1.00496	1.00349	0.979047	0.990943	0.994857	1.00142	0.996924	1.00776	0.98749	0.988705	0.98941	0.992223	0.998756
5.11667	0.999267	0.983902	0.988537	0.992814	0.990756	0.98809	0.994151	1.00501	0.990365	1.00527	0.999041	0.981343	1.00742	0.995856	1.00595	1.00703	0.98986	0.991946	1.00275	1.00177	0.992961	0.999509	0.98766	0.990182
5.21667	0.987527	0.999885	0.991474	0.995342	0.997218	0.992569	0.997749	0.997964	0.992453	0.996947	0.999319	0.983651	0.991109	0.99434	0.995647	0.990238	0.993667	1.00292	1.00191	0.989961	0.9869	0.996189	0.990149	0.993216
5.31667	1.00066	1.00045	0.988118	0.99668	0.986683	1.00311	0.987676	0.990923	0.993758	0.987936	0.99793	0.990436	0.99561	0.994616	0.988654	1.00004	0.999588	0.997307	0.9962	0.98296	0.993347	0.999371	0.988489	1.00179
5.41667	0.99417	0.991473	0.983644	0.993409	0.993847	0.994677	0.986093	1.001	1.00433	0.999581	0.988763	0.985008	0.989281	0.995443	0.990562	0.988699	0.992821	0.981096	0.994249	0.994902	0.999279	0.999924	0.991255	0.984247
5.51667	1.00066	0.997221	0.996647	0.997126	0.992863	0.993359	0.99631	0.996307	0.992714	0.989461	0.988347	0.990165	0.992938	1.00082	0.988782	1.00297	1.00382	0.99986	0.989791	0.989274	0.993605	0.994944	0.997755	0.999943
5.61667	0.993243	0.99694	0.990635	0.997423	0.991178	0.998628	0.994871	0.986642	0.99415	0.998611	0.997514	1.00224	1.00574	0.992411	1.00073	0.993317	0.997473	1.00114	0.989373	0.985706	0.992058	0.990379	0.984064	1.00073
5.71667	1.00266	0.997782	0.996647	0.993558	0.99188	0.986773	0.9989	0.983605	0.986188	0.995145	0.986402	0.98935	0.991953	1.00219	0.99107	1.00368	0.989578	0.983138	1.0001	0.983097	0.9918	1.00075	0.995819	0.979762
5.81667	0.987682	1.00171	0.993291	1.0056	0.989492	0.993096	0.989691	0.994236	0.996499	0.993759	0.98793	0.987993	0.982108	0.982629	0.991833	0.992198	0.99409	0.987733	0.992995	0.992294	0.996055	0.992039	0.988351	0.99071
5.91667	0.990462	0.996239	0.985881	1.00069	1.00003	0.984665	0.994007	0.992718	0.995324	0.994452	0.992375	0.996272	0.987734	0.98318	0.995902	0.995977	0.98408	0.992329	0.990905	0.988451	0.995927	0.999647	0.99167	0.993744
6.01667	0.994942	0.993015	1.00532	1.00545	0.985559	0.994808	0.995878	0.997826	0.989973	0.983638	0.990152	0.997086	0.990969	0.986074	0.989417	0.995697	0.999729	0.994371	0.997315	0.996138	0.992316	0.998956	1.00163	0.989259
6.11667	0.997877	1.00297	0.984762	0.990436	0.99174	0.985851	0.988683	0.991061	0.995455	0.991818	0.984875	0.983243	0.986046	0.991998	0.996156	0.993597	0.999588	0.993733	0.993413	0.990784	0.989995	1.00698	0.991394	0.980949
6.21667	0.993088	0.994417	0.991194	0.995788	0.996797	0.998628	0.993432	0.99396	0.989582	1.00083	0.995014	0.998036	0.995891	0.99806	0.986874	0.991358	1.0041	0.99552	0.993831	0.983235	0.988576	0.994805	0.987245	0.987412
6.31667	0.993088	1.00213	0.981546	0.999207	0.991459	0.985192	0.993432	0.991475	0.997935	0.999304	0.992791	0.983515	0.995469	0.997785	0.980899	0.987719	0.999588	0.986712	0.990209	0.979803	0.992058	0.997019	0.989596	0.989919
6.41667	0.996178	0.98923	0.985601	0.99326	0.987104	0.996257	0.983503	0.985262	1.00485	0.998888	0.987652	0.986365	0.989562	0.991447	0.978737	0.999056	0.989719	0.990542	0.996757	0.988314	0.989866	0.996742	0.999276	0.992293
6.51667	1.00328	0.99694	0.980148	0.992963	0.995111	0.995994	0.994583	0.993684	0.998326	0.989599	0.981263	0.987179	0.980983	0.987727	0.98929	1.00256	0.996627	0.991563	0.989791	0.994628	0.980581	0.99024	0.992085	0.994403
6.61667	0.991852	0.994978	0.983923	0.994152	0.990897	0.974786	0.998468	0.996998	0.994672	0.98849	0.998069	0.985551	0.987874	0.990069	0.994757	0.997796	0.983234	0.987861	0.987144	0.992157	0.988705	0.998541	0.996787	0.989919
6.71667	0.989999	0.986706	0.997066	0.985678	0.990897	0.976498	0.992137	0.989542	0.986971	0.996531	0.989458	0.986093	0.997297	0.983318	0.987129	0.985759	0.996486	0.994371	0.995503	0.986529	0.989092	0.987888	0.988628	0.984774
6.81667	0.985056	0.993015	0.980568	0.994598	0.987806	0.9873	0.99041	0.994374	0.986971	0.986827	0.987513	0.972793	0.994344	0.985385	0.988273	0.993457	0.98986	0.984159	0.988676	0.992432	0.982515	0.987612	0.983096	0.987281
6.91667	0.986909	1.00479	0.987698	0.994896	0.985559	0.983216	0.990266	0.981948	0.991017	0.984747	0.992791	0.990029	0.992234	0.995994	0.995774	0.986319	0.982106	0.983393	0.981431	0.985156	0.983289	0.995497	0.992638	0.986357
7.01667	0.996023	0.995819	0.981267	0.989692	0.992302	0.996521	0.989691	0.991199	0.980054	0.989599	0.989597	0.98935	0.982671	0.991998	0.995266	0.995417	0.993667	0.989137	0.987144	0.984333	0.994121	0.994667	0.992085	0.977784
7.11667	0.989999	1.00283	0.971339	0.983002	0.991178	0.995467	0.986957	0.98471	0.994019	0.991818	0.991819	0.987043	0.988015	0.994203	0.990053	0.992758	0.990424	0.985053	0.992438	0.984607	0.994379	0.993422	0.981852	0.9886
7.21667	0.994015	0.990912	0.994969	0.995639	0.987947	0.99494	0.988827	0.986781	0.99428	0.989599	0.999319	0.987043	0.99561	0.994478	0.988019	0.994857	0.991129	0.984415	0.993135	0.987353	0.994637	0.998402	0.994436	0.994008
7.31667	0.996796	0.991473	0.973576	0.98434	0.984997	0.988881	0.974294	0.983329	0.991278	0.995006	0.993764	0.984329	0.987874	0.993376	0.988909	0.992898	1.00184	0.981351	0.991323	0.991608	0.977873	0.98443	0.983788	0.991238
7.41667	0.990617	0.990912	0.984483	0.991922	0.987104	0.985587	0.992424	0.989266	0.998065	0.990154	0.995291	0.982972	0.995328	0.989656	0.987129	0.987019	0.996486	0.987478	0.982824	0.987627	0.987544	0.994667	0.99333	0.994008
7.51667	0.9883	0.999184	0.991334	1.00099	0.988087	0.990066	0.979618	0.990646	0.989451	0.994174	0.989597	0.9884	0.985624	0.993376	0.982552	0.996817	0.984503	0.997435	0.990069	0.987215	0.993089	0.989272	0.986968	0.99282
9.88333	1.02923	1.01867	1.0042	1.09748	1.04877	1.04737	1.07387	1.08067	1.05458	1.11326	1.07238	1.07404	1.08984	1.07852	1.12991	1.21222	1.0932	1.07798	1.11129	1.06477	1.14874	1.20785	1.13203	1.1974
9.98333	1.00915	0.994417	0.999304	1.07726	1.02293	1.03894	1.07286	1.06382	1.05406	1.09344	1.07876	1.08829	1.11122	1.10029	1.13423	1.26135	1.12873	1.11244	1.1425	1.12558	1.19297	1.3141	1.25967	1.26876
10.0833	1.01456	1.00563	1.00741	1.0899	1.02686	1.07187	1.08452	1.07956	1.07872	1.11548	1.12807	1.11054	1.15144	1.14383	1.16195	1.29368	1.18188	1.14461	1.17928	1.20739	1.2305	1.37676	1.31942	1.29013
10.1833	1.02367	1.00002	1.00378	1.08915	1.04357	1.05975	1.11401	1.09751	1.1013	1.15264	1.16002	1.13321	1.17198	1.18268	1.19653	1.33427	1.22629	1.16657	1.23027	1.24088	1.25758	1.39945	1.33573	1.32943
10.2833	1.0212	1.01124	1.01077	1.09272	1.04863	1.07306	1.11516	1.11988	1.1	1.15458	1.16654	1.13226	1.19715	1.20156	1.22971	1.347	1.25928	1.1935	1.24671	1.27616	1.28066	1.4072	1.3432	1.31651
10.3833	1.02182	0.997501	1.01916	1.09599	1.05411	1.07516	1.14898	1.13659	1.12584	1.17621	1.18432	1.14963	1.21332	1.2225	1.24357	1.35764	1.27451	1.21367	1.26274	1.2962	1.29394	1.42062	1.33767	1.32996
10.4833	1.02089	1.00002	1.00993	1.11026	1.05383	1.09176	1.15992	1.1497	1.14503	1.18716	1.18932	1.16334	1.22542	1.23628	1.25273	1.37234	1.29622	1.22988	1.28726	1.29387	1.2933	1.41135	1.34002	1.32785
10.5833	1.02723	1.01797	1.02713	1.11695	1.07265	1.10427	1.17315	1.16379	1.16173	1.18965	1.20168	1.18885	1.23836	1.23655	1.25858	1.38633	1.30849	1.25005	1.29213	1.31954	1.30465	1.40996	1.34182	1.33998
10.6833	1.02228	1.01895	1.02699	1.12454	1.07616	1.1077	1.17301	1.16489	1.1633	1.19978	1.22113	1.18654	1.25074	1.2462	1.25858	1.38773	1.30863	1.25184	1.29659	1.29675	1.32012	1.43874	1.33587	1.33128
10.7833	1.03016	1.02274	1.01608	1.13241	1.08066	1.10691	1.17776	1.1845	1.16278	1.20019	1.21696	1.20052	1.25622	1.2411	1.28515	1.38577	1.30073	1.25554	1.30077	1.30924	1.3169	1.42269	1.33878	1.33141
10.8833	1.01703	1.01503	1.02265	1.13048	1.09105	1.1077	1.1933	1.17207	1.16173	1.21891	1.21571	1.19971	1.27071	1.24248	1.29087	1.39291	1.3185	1.27685	1.30565	1.30457	1.32064	1.41923	1.3356	1.33299
10.9833	1.02336	1.01166	1.02042	1.13152	1.08066	1.12206	1.19373	1.16862	1.16447	1.20823	1.21488	1.20283	1.28027	1.26025	1.27803	1.38675	1.31765	1.26064	1.3246	1.31652	1.31999	1.4166	1.33864	1.33761
11.0833	1.03001	1.0083	1.02195	1.15888	1.09119	1.11916	1.20495	1.17814	1.17283	1.20809	1.22418	1.20622	1.29096	1.25116	1.28769	1.39725	1.32569	1.26256	1.32195	1.31295	1.31625	1.42311	1.34666	1.33735
11.1833	1.03649	1.01839	1.0151	1.15412	1.0933	1.13286	1.19762	1.19444	1.17505	1.22778	1.22168	1.20989	1.28111	1.25984	1.28642	1.39907	1.32245	1.26677	1.3207	1.30993	1.31225	1.41854	1.3302	1.34816
11.2833	1.03217	1.01643	1.02349	1.14788	1.09822	1.12258	1.2028	1.17952	1.17048	1.22473	1.22418	1.1974	1.28083	1.26686	1.28884	1.39809	1.3106	1.27864	1.3239	1.30883	1.32335	1.41702	1.34514	1.33761
11.3833	1.02058	1.01404	1.02014	1.15026	1.09246	1.13378	1.20423	1.18753	1.17257	1.22903	1.22446	1.20839	1.29785	1.26121	1.27778	1.40383	1.33415	1.28273	1.33686	1.30897	1.31367	1.4267	1.3479	1.34064
11.4833	1.02784	1.0233	1.02587	1.14148	1.09569	1.13747	1.20726	1.17939	1.16996	1.23915	1.23682	1.21423	1.29701	1.25625	1.2929	1.39655	1.31963	1.28209	1.34341	1.31995	1.32309	1.41121	1.3414	1.33893
11.5833	1.0314	1.01334	1.02657	1.15204	1.10538	1.13154	1.21085	1.18657	1.18457	1.24206	1.22279	1.22291	1.3001	1.27623	1.29507	1.40537	1.32526	1.29587	1.34034	1.31624	1.32193	1.41937	1.35247	1.34711
11.6833	1.03093	1.02288	1.02713	1.14193	1.10061	1.13154	1.21963	1.20065	1.18549	1.23887	1.2353	1.22156	1.31515	1.26121	1.28909	1.39011	1.31864	1.27954	1.3409	1.31212	1.32902	1.41356	1.34541	1.33049
11.7833	1.01904	1.02049	1.01916	1.14758	1.11423	1.14814	1.2228	1.19375	1.18497	1.24941	1.24057	1.21409	1.29673	1.27513	1.29011	1.39991	1.32752	1.29243	1.34062	1.30883	1.32141	1.42698	1.35081	1.33484
11.8833	1.03263	1.01853	1.02363	1.151	1.0992	1.13273	1.2179	1.1914	1.18497	1.25828	1.23224	1.22563	1.31993	1.26314	1.3088	1.40201	1.31356	1.2886	1.33853	1.31899	1.31509	1.42103	1.32951	1.33774
11.9833	1.02769	1.02596	1.02223	1.15397	1.10384	1.14129	1.2297	1.18809	1.19136	1.26064	1.23516	1.21409	1.31852	1.27403	1.29964	1.40355	1.33006	1.2923	1.34647	1.30842	1.32244	1.43127	1.35551	1.33471
12.0833	1.04128	1.03213	1.02853	1.1562	1.10524	1.14998	1.23143	1.1885	1.19175	1.25149	1.23807	1.23051	1.30812	1.27885	1.28629	1.39851	1.31864	1.28758	1.35177	1.32146	1.31857	1.41965	1.35136	1.33801
12.1833	1.03665	1.02302	1.02377	1.16676	1.10594	1.1293	1.24251	1.18822	1.1881	1.2605	1.23391	1.21504	1.32092	1.27596	1.28133	1.40005	1.30736	1.29013	1.35232	1.31844	1.32734	1.43556	1.34846	1.33774
12.2833	1.03943	1.02063	1.02307	1.14713	1.11283	1.1401	1.24323	1.19278	1.18614	1.25537	1.24585	1.2373	1.31909	1.27417	1.29214	1.38899	1.3223	1.29281	1.35831	1.31404	1.31664	1.42394	1.34126	1.33669
12.3833	1.03897	1.01517	1.02042	1.15159	1.1096	1.14511	1.2487	1.18284	1.19032	1.26507	1.24557	1.22617	1.31698	1.26893	1.28973	1.39487	1.32174	1.3103	1.35636	1.3404	1.31316	1.42131	1.35095	1.32996
12.4833	1.03881	1.02526	1.02545	1.16542	1.1096	1.13997	1.24452	1.19416	1.19436	1.26757	1.24793	1.23567	1.32387	1.28312	1.29494	1.39865	1.31328	1.30162	1.35623	1.31377	1.3178	1.41259	1.34818	1.33075
12.5833	1.02506	1.02778	1.02377	1.17092	1.12266	1.14603	1.26237	1.19112	1.17896	1.27894	1.25418	1.21884	1.31852	1.26879	1.29024	1.39613	1.32315	1.29549	1.3625	1.31912	1.32128	1.40111	1.34942	1.32732
12.6833	1.02815	1.02077	1.01287	1.18148	1.13095	1.1517	1.25632	1.1838	1.19201	1.27242	1.24043	1.2259	1.31895	1.27169	1.29227	1.40299	1.33288	1.3057	1.35636	1.3253	1.31832	1.4137	1.35219	1.33458
12.7833	1.03618	1.03704	1.02056	1.18594	1.12842	1.15104	1.25992	1.19085	1.18953	1.28157	1.24057	1.22834	1.32725	1.26769	1.29125	1.40103	1.32738	1.29166	1.35943	1.31418	1.31471	1.42518	1.34776	1.33471
12.8833	1.03279	1.02498	1.02042	1.17166	1.11297	1.14603	1.25373	1.19333	1.19932	1.28767	1.23627	1.21803	1.32612	1.27127	1.27841	1.40831	1.3309	1.30251	1.37587	1.32503	1.3236	1.43196	1.34458	1.32732
12.9833	1.03093	1.03101	1.02559	1.17211	1.11353	1.14313	1.26237	1.19747	1.20246	1.28781	1.25182	1.21599	1.33386	1.27899	1.28985	1.38899	1.33457	1.30366	1.36166	1.31487	1.32915	1.4166	1.34804	1.34012
13.0833	1.02723	1.02161	1.02601	1.18029	1.12519	1.13523	1.26093	1.19527	1.19802	1.27658	1.23821	1.22359	1.31923	1.26989	1.28489	1.40663	1.32879	1.31272	1.36779	1.30705	1.32167	1.41757	1.35966	1.33326
13.1833	1.02275	1.02091	1.02363	1.17122	1.12407	1.14577	1.2533	1.19844	1.20024	1.2824	1.25266	1.21151	1.32682	1.29125	1.28413	1.41741	1.3185	1.30417	1.37127	1.31144	1.31793	1.40595	1.35703	1.33115
13.2833	1.0368	1.03339	1.0165	1.1733	1.12491	1.14419	1.26179	1.1943	1.18927	1.27963	1.24849	1.22617	1.33695	1.28601	1.29074	1.40845	1.33556	1.29447	1.36709	1.32187	1.32257	1.4184	1.35067	1.32165
13.3833	1.01919	1.02344	1.01678	1.16824	1.13067	1.13945	1.27489	1.19168	1.18627	1.28323	1.25043	1.22359	1.33217	1.27995	1.29646	1.39725	1.33936	1.31042	1.36877	1.32997	1.31883	1.42062	1.36132	1.33207
13.4833	1.03464	1.0376	1.02014	1.16795	1.12421	1.14379	1.26683	1.20452	1.19332	1.28864	1.24821	1.22563	1.33329	1.26452	1.27549	1.40523	1.32794	1.31476	1.38632	1.32283	1.32979	1.42684	1.35039	1.34552
13.5833	1.03248	1.02961	1.01594	1.15219	1.12435	1.13484	1.26942	1.18739	1.19123	1.2928	1.25474	1.23676	1.33878	1.28781	1.28248	1.40243	1.32174	1.30455	1.38716	1.32489	1.32347	1.42463	1.3526	1.3231
13.6833	1.03217	1.0289	1.02895	1.16363	1.12407	1.14129	1.27143	1.18201	1.19136	1.28989	1.24405	1.22603	1.34356	1.26769	1.30422	1.40369	1.33231	1.30455	1.37392	1.32036	1.32206	1.42975	1.34555	1.33167
13.7833	1.02908	1.03409	1.02223	1.16408	1.1221	1.12298	1.28021	1.18822	1.19071	1.30417	1.25182	1.22033	1.34215	1.28037	1.29697	1.40411	1.3247	1.29664	1.38507	1.32146	1.32631	1.40512	1.35869	1.33141
13.8833	1.03897	1.03465	1.01594	1.16319	1.12744	1.13615	1.26006	1.18781	1.18784	1.29488	1.23363	1.21287	1.34117	1.26645	1.2943	1.39977	1.33372	1.30379	1.38479	1.32173	1.31548	1.42159	1.36422	1.31875
13.9833	1.03356	1.0362	1.01566	1.16512	1.13586	1.13352	1.26021	1.18132	1.1834	1.2849	1.23988	1.22251	1.32725	1.27141	1.2793	1.40761	1.32668	1.31196	1.39203	1.32407	1.32322	1.42186	1.36795	1.32732
14.0833	1.0314	1.02778	1.02349	1.16587	1.12603	1.13391	1.25647	1.18822	1.18575	1.29183	1.24793	1.21952	1.33287	1.27706	1.28299	1.40635	1.32386	1.30123	1.38646	1.32146	1.32012	1.41965	1.35509	1.32284
14.1833	1.03433	1.04026	1.01496	1.16304	1.12252	1.12825	1.26309	1.18753	1.18588	1.29377	1.24307	1.21789	1.33175	1.27182	1.28629	1.40999	1.33147	1.31757	1.37712	1.35001	1.3227	1.41564	1.36394	1.33906
14.2833	1.03788	1.03676	1.01119	1.15739	1.12013	1.13997	1.25042	1.19637	1.19306	1.29031	1.2528	1.22264	1.33709	1.27582	1.269	1.40327	1.32808	1.3117	1.37281	1.31404	1.32206	1.42159	1.35495	1.32125
14.3833	1.0368	1.03297	1.02154	1.17211	1.1176	1.1326	1.25359	1.19278	1.18262	1.29238	1.25474	1.21952	1.34792	1.26521	1.28184	1.41083	1.33048	1.29996	1.38367	1.31871	1.31458	1.41813	1.35758	1.3384
14.4833	1.02553	1.02694	1.01636	1.1559	1.11142	1.1351	1.27014	1.18629	1.19371	1.30029	1.24293	1.21436	1.33597	1.2648	1.27612	1.39963	1.32273	1.31068	1.39719	1.3135	1.32322	1.42325	1.35634	1.31901
14.5833	1.02784	1.03718	1.01692	1.15769	1.11648	1.13892	1.25488	1.18367	1.18405	1.29183	1.24682	1.22739	1.33048	1.26755	1.29011	1.40215	1.33993	1.30583	1.39482	1.32475	1.3049	1.41121	1.36381	1.32455
14.6833	1.04097	1.03241	1.01776	1.15813	1.11648	1.1347	1.25963	1.1816	1.18144	1.29807	1.23779	1.21762	1.32767	1.27486	1.27803	1.40985	1.33302	1.29919	1.38952	1.3312	1.32347	1.42145	1.35371	1.32745
14.7833	1.03804	1.02835	1.01664	1.16185	1.11156	1.1326	1.25359	1.18836	1.19058	1.3007	1.24405	1.22278	1.32654	1.25915	1.28629	1.40593	1.32738	1.29536	1.38103	1.31871	1.32012	1.42103	1.35883	1.33207
14.8833	1.03078	1.04461	1.02335	1.16363	1.11353	1.13563	1.26438	1.17952	1.18131	1.29211	1.22668	1.20514	1.32978	1.28174	1.27676	1.40859	1.33372	1.30149	1.38757	1.32667	1.32206	1.41619	1.36464	1.31743
14.9833	1.02661	1.02947	1.01818	1.15174	1.11423	1.13707	1.25747	1.18284	1.1971	1.29627	1.24641	1.22142	1.32317	1.27417	1.27002	1.40327	1.33668	1.30009	1.38925	1.30814	1.31574	1.42228	1.36948	1.32706
15.0833	1.01981	1.02778	1.02293	1.1513	1.11409	1.13246	1.25733	1.18988	1.1804	1.28421	1.24307	1.2126	1.33329	1.27527	1.2657	1.40607	1.31582	1.29421	1.38757	1.34987	1.31471	1.4256	1.35095	1.32416
15.1833	1.02275	1.03998	1.01259	1.15561	1.11788	1.13563	1.25906	1.1816	1.17087	1.2928	1.25307	1.21396	1.3302	1.28698	1.27676	1.38745	1.32259	1.28949	1.38312	1.3183	1.30568	1.42504	1.36353	1.32297
15.2833	1.02908	1.04769	1.02741	1.14773	1.11199	1.1347	1.25402	1.18256	1.17896	1.29613	1.25821	1.22156	1.32373	1.28188	1.28489	1.40901	1.32766	1.29945	1.37949	1.33161	1.31316	1.42892	1.36228	1.32165
15.3833	1.02846	1.03942	1.01734	1.15263	1.11859	1.12983	1.25647	1.19582	1.18053	1.28795	1.24904	1.22033	1.32204	1.26907	1.27333	1.39389	1.32978	1.29153	1.38451	1.3231	1.30245	1.42408	1.36353	1.32218
15.4833	1.04097	1.03311	1.01412	1.16007	1.11213	1.13075	1.24481	1.17939	1.18183	1.29349	1.23821	1.21884	1.31304	1.27072	1.26519	1.40649	1.324	1.302	1.37949	1.32228	1.31496	1.42449	1.35468	1.31585
15.5833	1.03248	1.04054	1.01287	1.15977	1.11592	1.13457	1.2415	1.18298	1.18705	1.28587	1.24002	1.21273	1.33456	1.28106	1.27879	1.39963	1.32766	1.28822	1.38116	1.33038	1.30632	1.41951	1.3591	1.32891
15.6833	1.02213	1.03942	1.01468	1.16423	1.11325	1.13523	1.24395	1.18615	1.17818	1.31013	1.24543	1.21206	1.31824	1.26783	1.26926	1.40229	1.34811	1.30149	1.39148	1.33477	1.31986	1.41453	1.36934	1.32693
15.7833	1.03294	1.03451	1.01315	1.16408	1.12027	1.13273	1.25129	1.19678	1.18758	1.28781	1.23821	1.20174	1.31698	1.27871	1.27701	1.39837	1.32357	1.29204	1.37698	1.31789	1.31535	1.42477	1.36159	1.31769
15.8833	1.04669	1.04194	1.0172	1.15278	1.11353	1.13404	1.25733	1.18643	1.17609	1.27672	1.24793	1.21626	1.31402	1.27086	1.27536	1.40243	1.32963	1.29447	1.38144	1.32558	1.2982	1.41882	1.36782	1.326
15.9833	1.0368	1.03648	1.01664	1.15308	1.11395	1.13576	1.25086	1.1867	1.17231	1.29183	1.24252	1.21124	1.33456	1.27968	1.26481	1.39739	1.31554	1.30187	1.38158	1.35317	1.29988	1.42643	1.34942	1.33075
16.0833	1.03773	1.0369	1.02377	1.15263	1.11704	1.12298	1.23733	1.18588	1.17753	1.29516	1.23571	1.21871	1.34018	1.28574	1.27739	1.40691	1.32597	1.29983	1.36974	1.32805	1.30852	1.42421	1.35758	1.31954
16.1833	1.028	1.03297	1.02195	1.15918	1.1155	1.12864	1.25416	1.19043	1.1787	1.28961	1.25029	1.21368	1.32373	1.27513	1.26849	1.39487	1.32442	1.29447	1.38437	1.32805	1.30619	1.42504	1.36685	1.32587
16.2833	1.02923	1.03465	1.01888	1.15858	1.12407	1.13615	1.24913	1.19126	1.19267	1.28518	1.25335	1.21246	1.33428	1.28381	1.26773	1.40677	1.31131	1.29141	1.38576	1.32516	1.31071	1.42975	1.37169	1.30609
16.3833	1.03016	1.04475	1.02195	1.14505	1.11704	1.13628	1.24639	1.18726	1.1834	1.28975	1.24266	1.21206	1.32528	1.27017	1.2657	1.39683	1.32808	1.2997	1.39064	1.3231	1.31548	1.42006	1.36311	1.32732
16.4833	1.0297	1.0383	1.02363	1.15382	1.11774	1.14287	1.24754	1.1885	1.17831	1.28504	1.24335	1.21545	1.31065	1.26025	1.26977	1.39543	1.3309	1.30162	1.38158	1.31816	1.3178	1.41259	1.36381	1.3198
16.5833	1.03727	1.039	1.02825	1.14312	1.12027	1.12193	1.24179	1.18394	1.16708	1.28836	1.23752	1.21816	1.32457	1.27582	1.26989	1.39473	1.32597	1.29792	1.38103	1.32599	1.29472	1.41965	1.37072	1.32244
16.6833	1.03572	1.04377	1.02056	1.1513	1.11016	1.13036	1.23589	1.18615	1.1847	1.28767	1.25363	1.21016	1.31768	1.27403	1.27066	1.40131	1.32456	1.30264	1.37392	1.32256	1.31019	1.41702	1.36851	1.32614
16.7833	1.02954	1.04629	1.02028	1.15799	1.11325	1.13655	1.24639	1.18243	1.17087	1.28282	1.23766	1.21776	1.32471	1.2721	1.26913	1.40229	1.32357	1.29651	1.38409	1.33216	1.30607	1.41425	1.36146	1.3082
16.8833	1.03402	1.04391	1.01454	1.15799	1.12294	1.13497	1.25618	1.19126	1.17492	1.29197	1.25029	1.20731	1.31895	1.27637	1.27205	1.41181	1.33401	1.30187	1.37587	1.34218	1.31045	1.41591	1.37279	1.32627
16.9833	1.04159	1.03591	1.0186	1.15739	1.11943	1.13102	1.2474	1.18394	1.18196	1.28809	1.2396	1.21124	1.31768	1.27913	1.27422	1.38689	1.32386	1.29996	1.37559	1.32667	1.31741	1.41813	1.36657	1.33128
17.0833	1.03248	1.04419	1.03286	1.1568	1.11241	1.13484	1.251	1.19375	1.17335	1.29571	1.24307	1.19984	1.31571	1.26879	1.2732	1.39361	1.33866	1.29562	1.3937	1.32997	1.3089	1.41813	1.36187	1.32244
17.1833	1.03495	1.03662	1.01986	1.15471	1.10946	1.13378	1.24582	1.17856	1.16943	1.2885	1.24363	1.20799	1.3084	1.267	1.27625	1.39487	1.32287	1.29013	1.38005	1.33395	1.31277	1.41868	1.36076	1.32851
17.2833	1.04314	1.05064	1.02741	1.15709	1.11746	1.13246	1.23949	1.19347	1.17622	1.29197	1.23932	1.21301	1.32106	1.26714	1.27434	1.39193	1.33189	1.3006	1.37726	1.33505	1.30503	1.42961	1.36616	1.31967
17.3833	1.03665	1.04138	1.01804	1.15977	1.11451	1.13892	1.25546	1.19237	1.16865	1.2885	1.2496	1.20527	1.32092	1.26452	1.26977	1.38941	1.3216	1.29728	1.3813	1.32887	1.30039	1.42823	1.37445	1.32125
17.4833	1.03526	1.05218	1.02321	1.14907	1.11704	1.13865	1.25445	1.19899	1.17205	1.28254	1.25613	1.2126	1.32176	1.27045	1.26519	1.38521	1.32315	1.30915	1.39231	1.33766	1.28995	1.42311	1.37086	1.31255
17.5833	1.04144	1.04433	1.02839	1.16037	1.12266	1.13602	1.24236	1.18394	1.17922	1.28531	1.24141	1.20269	1.30854	1.26466	1.26671	1.39711	1.32808	1.29243	1.37559	1.32777	1.30091	1.42657	1.3692	1.32666
17.6833	1.03727	1.04951	1.02937	1.15858	1.11578	1.12298	1.24855	1.19071	1.16682	1.28005	1.24405	1.20541	1.32978	1.27706	1.27231	1.40341	1.31878	1.29409	1.38381	1.32901	1.30374	1.42684	1.36533	1.3136
17.7833	1.0368	1.04405	1.02168	1.15026	1.11929	1.11639	1.24769	1.18574	1.16904	1.28726	1.25085	1.20134	1.30052	1.28229	1.26328	1.39179	1.31948	1.29932	1.39189	1.34383	1.29407	1.41688	1.37058	1.32363
17.8833	1.03974	1.04559	1.02056	1.15427	1.12294	1.12838	1.24496	1.19513	1.16761	1.28767	1.24293	1.21341	1.32345	1.27169	1.2643	1.37052	1.32526	1.29345	1.37476	1.3183	1.30607	1.43168	1.36159	1.32956
17.9833	1.05102	1.0533	1.02447	1.16051	1.11831	1.13286	1.24121	1.20093	1.16983	1.27949	1.24307	1.20188	1.31965	1.26094	1.27256	1.37248	1.33654	1.29204	1.36598	1.32434	1.29433	1.42532	1.36007	1.30978
18.0833	1.03186	1.03914	1.0302	1.15962	1.12561	1.13036	1.24107	1.18905	1.16617	1.29446	1.24571	1.20174	1.32134	1.28133	1.26913	1.38213	1.32146	1.29141	1.37615	1.32365	1.29433	1.41909	1.36325	1.30793
18.1833	1.03371	1.04909	1.01972	1.15323	1.11676	1.13167	1.24452	1.18905	1.16904	1.27894	1.25182	1.21016	1.31557	1.27747	1.27282	1.38913	1.32724	1.30085	1.37016	1.32818	1.29614	1.41827	1.37252	1.30978
18.2833	1.03572	1.04797	1.01986	1.16126	1.11732	1.14169	1.24265	1.19568	1.18223	1.2953	1.23974	1.20636	1.31824	1.27169	1.25921	1.39389	1.32526	1.27813	1.3813	1.32462	1.30078	1.42103	1.371	1.31374
18.3833	1.04777	1.04769	1.02419	1.15145	1.12294	1.13273	1.24553	1.19043	1.15991	1.28476	1.2428	1.20812	1.32795	1.26824	1.2601	1.38899	1.3216	1.29383	1.38033	1.32763	1.31354	1.42145	1.36339	1.32231
18.4833	1.03232	1.04965	1.02126	1.15754	1.11367	1.12878	1.24395	1.18588	1.17296	1.27381	1.24641	1.19591	1.31402	1.27775	1.26328	1.40033	1.33006	1.28732	1.37768	1.33024	1.30013	1.4173	1.37155	1.3107
18.5833	1.03742	1.05596	1.02755	1.15115	1.11971	1.12654	1.25215	1.18132	1.15873	1.27173	1.24266	1.19645	1.31698	1.27802	1.26595	1.39151	1.32428	1.28847	1.3774	1.3437	1.30981	1.42836	1.36865	1.31624
18.6833	1.03541	1.0533	1.02755	1.1626	1.11788	1.12772	1.24395	1.18712	1.15978	1.28337	1.24974	1.20432	1.32373	1.27169	1.25858	1.37933	1.32808	1.28655	1.3611	1.34301	1.29291	1.42075	1.37238	1.30714
18.7833	1.03032	1.05835	1.02349	1.1559	1.12238	1.1297	1.24481	1.19168	1.16343	1.27492	1.25029	1.21165	1.31473	1.27747	1.26951	1.38339	1.32653	1.28285	1.37378	1.33464	1.2982	1.41425	1.37473	1.31914
18.8833	1.04777	1.04923	1.03314	1.16022	1.12196	1.11784	1.24452	1.18601	1.16591	1.27838	1.24571	1.20106	1.31881	1.27541	1.26303	1.38213	1.32343	1.28132	1.37531	1.33189	1.2942	1.42325	1.37252	1.32416
18.9833	1.04808	1.04236	1.02937	1.14936	1.12322	1.1243	1.2392	1.19361	1.15469	1.28143	1.24516	1.20866	1.30826	1.27127	1.26646	1.38913	1.34049	1.28273	1.37113	1.32777	1.29175	1.42131	1.37376	1.31914
19.0833	1.03804	1.05905	1.01594	1.15055	1.11999	1.12838	1.24121	1.18091	1.17557	1.27589	1.24057	1.20866	1.30446	1.27361	1.25832	1.40033	1.33852	1.28541	1.38688	1.31597	1.29046	1.41412	1.36173	1.32139
19.1833	1.04592	1.06115	1.01986	1.15427	1.12294	1.12693	1.24596	1.18505	1.16474	1.27298	1.24668	1.20432	1.30798	1.26328	1.25298	1.37919	1.32245	1.27532	1.37921	1.32338	1.29536	1.41868	1.37542	1.30978
19.2833	1.03927	1.05148	1.02391	1.15992	1.11831	1.13681	1.23877	1.19596	1.16969	1.28226	1.25252	1.21396	1.31332	1.2681	1.26086	1.3785	1.31455	1.28285	1.37141	1.32489	1.29278	1.41605	1.3757	1.31664
19.3833	1.03989	1.06199	1.03118	1.15873	1.11002	1.12548	1.24121	1.18795	1.1663	1.2745	1.2446	1.19726	1.30868	1.28257	1.25616	1.38395	1.33105	1.27775	1.38437	1.33409	1.29704	1.42228	1.35592	1.31862
19.4833	1.03835	1.05246	1.02755	1.15234	1.11746	1.13523	1.24611	1.19098	1.17165	1.28601	1.25946	1.19319	1.3129	1.26838	1.26175	1.38227	1.31991	1.28426	1.38729	1.32558	1.29485	1.42491	1.3739	1.30081
19.5833	1.04545	1.0533	1.03076	1.15784	1.12069	1.12838	1.24754	1.18519	1.1727	1.28005	1.2453	1.21016	1.30573	1.26039	1.26112	1.38773	1.33189	1.27111	1.37531	1.34781	1.29111	1.41979	1.38165	1.30938
19.6833	1.03974	1.0512	1.02531	1.15382	1.12252	1.12522	1.23747	1.19016	1.17296	1.28892	1.25043	1.19618	1.30545	1.27747	1.26315	1.38759	1.32202	1.28324	1.37838	1.33093	1.29317	1.42435	1.36311	1.3169
19.7833	1.04808	1.0519	1.03132	1.15828	1.11718	1.1189	1.24121	1.18739	1.16552	1.28323	1.24502	1.19482	1.31093	1.26838	1.25972	1.38675	1.32414	1.29038	1.3703	1.32118	1.30465	1.42532	1.36989	1.30226
19.8833	1.04499	1.04194	1.03272	1.15501	1.12224	1.12838	1.24395	1.18988	1.16474	1.28323	1.25002	1.20961	1.31543	1.27706	1.2512	1.38899	1.32555	1.29511	1.37894	1.32558	1.29923	1.42435	1.37127	1.30213
19.9833	1.0521	1.04937	1.03356	1.15026	1.11774	1.13141	1.24021	1.18753	1.17296	1.28656	1.25224	1.21178	1.31346	1.26755	1.26023	1.38619	1.3381	1.27609	1.37113	1.33518	1.30013	1.40955	1.36574	1.31163
20.0833	1.04545	1.06438	1.02964	1.15011	1.11831	1.11903	1.23057	1.19057	1.15495	1.28434	1.24057	1.20201	1.31248	1.26934	1.26112	1.38241	1.32696	1.27979	1.37866	1.32297	1.29562	1.42283	1.36865	1.30872
20.1833	1.0521	1.06269	1.03286	1.15442	1.13235	1.12601	1.2369	1.18629	1.171	1.29169	1.24516	1.19319	1.31543	1.27678	1.25998	1.38647	1.32879	1.28541	1.37378	1.32791	1.27976	1.42504	1.37155	1.31347
20.2833	1.03665	1.06101	1.02657	1.16393	1.12308	1.13141	1.24496	1.18243	1.16708	1.27991	1.24974	1.18898	1.31909	1.2721	1.24968	1.37346	1.31666	1.27634	1.38521	1.32599	1.30207	1.4101	1.38303	1.30872
20.3833	1.04885	1.05666	1.03803	1.15189	1.12083	1.1347	1.23042	1.1856	1.1556	1.29308	1.25446	1.20052	1.31206	1.2743	1.25603	1.39655	1.32216	1.2743	1.37615	1.32489	1.3022	1.42463	1.3739	1.32139
20.4833	1.04128	1.04783	1.0309	1.16393	1.11704	1.121	1.22855	1.19457	1.15952	1.28975	1.24363	1.19903	1.30671	1.28009	1.24535	1.38088	1.32625	1.27315	1.37685	1.34493	1.29704	1.40941	1.37611	1.31743
20.5833	1.047	1.05498	1.02349	1.16111	1.11479	1.1297	1.24956	1.19568	1.16708	1.27644	1.25321	1.20242	1.30207	1.28464	1.25692	1.39011	1.31906	1.27685	1.37406	1.32791	1.29485	1.42421	1.36685	1.30767
20.6833	1.0487	1.05975	1.03831	1.14713	1.11803	1.1243	1.24035	1.19816	1.16891	1.28559	1.25266	1.19102	1.30756	1.27127	1.25324	1.37374	1.33105	1.28566	1.36138	1.33862	1.30684	1.42062	1.37183	1.31426
20.7833	1.06106	1.06452	1.04335	1.15501	1.12336	1.13457	1.24999	1.1925	1.16265	1.28379	1.23363	1.20188	1.30066	1.27113	1.25069	1.38549	1.3247	1.26869	1.38437	1.32269	1.30013	1.41578	1.37418	1.29896
20.8833	1.04036	1.06746	1.02349	1.15189	1.11732	1.12851	1.24337	1.18629	1.1586	1.29058	1.24418	1.19957	1.30868	1.26562	1.25743	1.37724	1.31934	1.28541	1.37127	1.32859	1.2884	1.42283	1.36546	1.30859
20.9833	1.04607	1.06157	1.02923	1.14743	1.11508	1.11732	1.22927	1.19347	1.16421	1.27935	1.2471	1.19211	1.30151	1.26976	1.24243	1.37514	1.3333	1.27839	1.37392	1.31583	1.29252	1.42131	1.371	1.30477
21.0833	1.04854	1.04601	1.0344	1.16973	1.12702	1.12772	1.24121	1.19457	1.16108	1.27824	1.25099	1.19496	1.31079	1.267	1.2451	1.38283	1.33316	1.28898	1.37629	1.33203	1.29988	1.42075	1.37473	1.3074
21.1833	1.05071	1.05891	1.03999	1.16572	1.12983	1.11969	1.22049	1.1885	1.17283	1.28254	1.25446	1.18912	1.3053	1.2721	1.24103	1.38633	1.3278	1.2766	1.37615	1.32956	1.30374	1.42615	1.36948	1.31255
21.2833	1.04901	1.05765	1.02405	1.15234	1.12238	1.1326	1.24798	1.18809	1.15508	1.27325	1.25724	1.20541	1.29827	1.26907	1.25476	1.37458	1.32343	1.27775	1.37489	1.32681	1.28634	1.41605	1.37017	1.31387
21.3833	1.05102	1.05765	1.04027	1.15055	1.11803	1.12654	1.24711	1.19513	1.15573	1.26868	1.26196	1.18613	1.30362	1.26039	1.2437	1.38773	1.32428	1.28336	1.37894	1.34617	1.30001	1.42131	1.36865	1.31189
21.4833	1.04839	1.06844	1.02042	1.15293	1.12322	1.12074	1.23143	1.17897	1.15469	1.28573	1.24293	1.19509	1.3046	1.26287	1.25642	1.38088	1.3333	1.28668	1.36668	1.33271	1.2826	1.40872	1.37252	1.30543
21.5833	1.05055	1.06578	1.03817	1.17033	1.12154	1.12456	1.2428	1.19016	1.16487	1.29516	1.24766	1.19794	1.31459	1.27871	1.24968	1.38311	1.32935	1.27468	1.37726	1.33381	1.29717	1.41564	1.38206	1.29751
21.6833	1.04901	1.07068	1.03594	1.15977	1.12055	1.13036	1.23114	1.18684	1.14829	1.27713	1.24766	1.18871	1.2994	1.26149	1.24548	1.38031	1.33048	1.28222	1.37281	1.33024	1.29407	1.41896	1.36588	1.31044
21.7833	1.04762	1.05821	1.04069	1.16096	1.12196	1.12561	1.23531	1.19927	1.17152	1.29128	1.25377	1.19984	1.31121	1.26425	1.2484	1.3827	1.31892	1.27481	1.3689	1.31981	1.29098	1.41923	1.37266	1.30938
21.8833	1.04962	1.05302	1.04363	1.16126	1.12884	1.13325	1.24064	1.18905	1.15651	1.2892	1.25488	1.19699	1.3084	1.27238	1.24866	1.38885	1.32132	1.26562	1.36291	1.33161	1.28337	1.42255	1.3656	1.32178
21.9833	1.05271	1.07068	1.0316	1.15813	1.1221	1.12785	1.23431	1.18974	1.14816	1.27616	1.24585	1.19577	1.29476	1.26204	1.24434	1.37738	1.31624	1.27341	1.37211	1.32022	1.27473	1.43625	1.38261	1.30503
22.0833	1.05117	1.06662	1.03733	1.16126	1.12491	1.11705	1.22654	1.17373	1.16669	1.27811	1.25154	1.18871	1.3174	1.27775	1.24027	1.37612	1.32893	1.27417	1.37225	1.32846	1.29381	1.42878	1.36892	1.30609
22.1833	1.0453	1.06452	1.03678	1.14565	1.13249	1.11349	1.23891	1.18809	1.15769	1.28961	1.25182	1.19034	1.29546	1.27444	1.24713	1.38074	1.32583	1.26652	1.36654	1.33711	1.29291	1.41384	1.38109	1.31176
22.2833	1.05364	1.06227	1.04125	1.15724	1.1214	1.12706	1.23474	1.20231	1.1496	1.28143	1.24474	1.19889	1.29912	1.26549	1.24128	1.37864	1.33175	1.27839	1.37489	1.35728	1.28414	1.41412	1.36851	1.3169
22.3833	1.04391	1.06592	1.02251	1.15947	1.12041	1.12548	1.23272	1.19209	1.15939	1.26078	1.24099	1.19672	1.30924	1.27541	1.23785	1.38815	1.31864	1.2752	1.36486	1.33038	1.28672	1.41799	1.36851	1.32165
22.4833	1.04607	1.05779	1.03943	1.14862	1.1235	1.13615	1.24294	1.20217	1.17335	1.28379	1.23849	1.19021	1.31163	1.27196	1.25654	1.37542	1.3326	1.28196	1.36751	1.33161	1.29046	1.43058	1.38635	1.31954
22.5833	1.04823	1.06129	1.03915	1.15516	1.13348	1.12417	1.23675	1.18836	1.15586	1.2831	1.24752	1.19998	1.31163	1.26631	1.23506	1.37402	1.32597	1.27251	1.3664	1.32928	1.28492	1.41494	1.37611	1.3074
22.6833	1.04576	1.06522	1.02992	1.15992	1.12561	1.13062	1.22841	1.17511	1.15377	1.28268	1.24655	1.1898	1.29532	1.27169	1.23862	1.37738	1.33443	1.26728	1.36695	1.33505	1.28517	1.42311	1.38413	1.30358
22.7833	1.05828	1.06017	1.0309	1.16482	1.12463	1.12048	1.23402	1.18684	1.16082	1.27658	1.24835	1.19021	1.3008	1.25185	1.23938	1.37388	1.33034	1.27264	1.37295	1.3426	1.28917	1.4184	1.37542	1.30872
22.8833	1.04947	1.07139	1.02685	1.16705	1.11831	1.1322	1.24208	1.17304	1.15847	1.27616	1.23682	1.19618	1.31206	1.25942	1.2465	1.3708	1.32583	1.26562	1.36598	1.34164	1.29575	1.41923	1.38635	1.30582
22.9833	1.03788	1.07419	1.03678	1.15234	1.1273	1.12351	1.23949	1.19057	1.16291	1.28185	1.2496	1.19604	1.31684	1.2597	1.24726	1.38465	1.32132	1.26307	1.36584	1.32516	1.28311	1.41508	1.37846	1.31097
23.0833	1.04854	1.07335	1.0365	1.15858	1.12575	1.11784	1.23402	1.18422	1.1633	1.27727	1.25307	1.19536	1.29532	1.267	1.2315	1.3673	1.32287	1.27456	1.37364	1.3356	1.28234	1.41951	1.37404	1.30529
23.1833	1.06584	1.07685	1.03258	1.17256	1.13053	1.12074	1.23834	1.19264	1.15012	1.27145	1.25099	1.18831	1.30685	1.26948	1.23429	1.36604	1.3309	1.26779	1.36877	1.35399	1.29807	1.41412	1.36837	1.31281
23.2833	1.05905	1.07167	1.03608	1.16126	1.13179	1.12561	1.23287	1.1856	1.16004	1.27838	1.24724	1.18831	1.30249	1.27458	1.23366	1.37262	1.32569	1.27571	1.3742	1.31871	1.29678	1.41882	1.37169	1.29685
23.3833	1.04978	1.07082	1.03789	1.16274	1.12266	1.13141	1.23057	1.19043	1.15756	1.28504	1.24724	1.18939	1.30348	1.26411	1.2376	1.37919	1.33245	1.27405	1.35985	1.33367	1.27344	1.43265	1.37888	1.30688
23.4833	1.06245	1.07068	1.0302	1.15709	1.12856	1.12535	1.25244	1.19596	1.15064	1.27741	1.23766	1.18478	1.3032	1.2681	1.24179	1.37598	1.32132	1.26754	1.37935	1.32544	1.28388	1.41342	1.37044	1.30516
23.5833	1.05318	1.06508	1.03342	1.15338	1.12856	1.12957	1.23373	1.19499	1.15051	1.27991	1.25266	1.19591	1.29363	1.2637	1.24281	1.38172	1.32202	1.27009	1.36472	1.32297	1.28208	1.42587	1.37044	1.30899
23.6833	1.06106	1.06886	1.0351	1.15977	1.111	1.1214	1.22826	1.19513	1.1449	1.27949	1.24502	1.18668	1.30798	1.27251	1.22781	1.3715	1.324	1.26741	1.37085	1.33024	1.29562	1.40969	1.37542	1.3198
23.7833	1.05163	1.05863	1.03775	1.15486	1.12308	1.12693	1.22956	1.18795	1.15364	1.28185	1.24391	1.19808	1.3039	1.27527	1.24192	1.3659	1.31526	1.26945	1.35971	1.33312	1.2804	1.41508	1.39617	1.3136
23.8833	1.05565	1.06844	1.02811	1.16185	1.1273	1.13049	1.23747	1.18891	1.15429	1.27769	1.24779	1.17202	1.30812	1.27582	1.23302	1.37556	1.32329	1.26473	1.37406	1.33161	1.28053	1.41038	1.36782	1.30951
23.9833	1.06013	1.06522	1.03132	1.16066	1.13039	1.12456	1.23862	1.18146	1.15769	1.27935	1.24807	1.18926	1.28969	1.27141	1.22577	1.38493	1.32992	1.26932	1.35818	1.34356	1.28659	1.41273	1.38261	1.30595
24.0833	1.06831	1.07223	1.02643	1.16319	1.1287	1.11271	1.23848	1.18532	1.15455	1.28601	1.25127	1.18763	1.3039	1.26797	1.23455	1.3729	1.33344	1.25949	1.36974	1.35317	1.28337	1.43168	1.37528	1.31057
24.1833	1.05055	1.06844	1.03412	1.15397	1.11634	1.12324	1.24121	1.19678	1.14411	1.27519	1.24641	1.18342	1.3008	1.27472	1.24484	1.38255	1.3185	1.26447	1.36695	1.34054	1.28556	1.42325	1.38054	1.30965
24.2833	1.06075	1.06844	1.04503	1.15858	1.1339	1.11323	1.23445	1.18408	1.15495	1.27381	1.2471	1.18831	1.30193	1.26411	1.23111	1.36898	1.32075	1.27098	1.35609	1.32983	1.28569	1.41204	1.38441	1.31321
24.3833	1.05719	1.06746	1.03398	1.16512	1.12098	1.12443	1.23647	1.19057	1.15299	1.29031	1.24793	1.19645	1.29532	1.26686	1.23353	1.36996	1.32555	1.26971	1.36751	1.32489	1.28144	1.41633	1.37515	1.30899
24.4833	1.06739	1.07868	1.04335	1.16349	1.11999	1.12482	1.23776	1.19223	1.15534	1.26771	1.25821	1.19387	1.29785	1.27017	1.22412	1.38423	1.31483	1.26575	1.38186	1.32928	1.26944	1.41467	1.37846	1.30068
24.5833	1.05488	1.06662	1.03048	1.15427	1.1273	1.11692	1.2428	1.19168	1.14803	1.28531	1.24543	1.20432	1.28857	1.26741	1.22933	1.375	1.32583	1.26996	1.36263	1.33134	1.28053	1.40872	1.37791	1.30266
24.6833	1.06044	1.07209	1.03132	1.16587	1.13137	1.11811	1.2333	1.19002	1.14176	1.27187	1.25821	1.18518	1.30784	1.25694	1.22781	1.37122	1.3192	1.26664	1.35943	1.32818	1.27808	1.40914	1.37763	1.31176
24.7833	1.06075	1.06746	1.02797	1.15888	1.12645	1.12522	1.24165	1.18505	1.15978	1.28628	1.24418	1.18152	1.30967	1.26521	1.23811	1.35904	1.31808	1.2669	1.36514	1.33299	1.28105	1.41356	1.37542	1.31097
24.8833	1.05688	1.0833	1.03202	1.15353	1.13727	1.12482	1.24424	1.19333	1.16017	1.26896	1.23516	1.18993	1.3008	1.26301	1.2484	1.3708	1.32992	1.27328	1.37071	1.32448	1.28505	1.40775	1.37224	1.30371
24.9833	1.06368	1.06774	1.03034	1.16393	1.12912	1.1264	1.23934	1.19016	1.15403	1.27436	1.24807	1.18722	1.29743	1.25956	1.22908	1.37584	1.33119	1.26817	1.35818	1.35619	1.28066	1.40664	1.38662	1.30846
25.0833	1.05534	1.07167	1.04181	1.16795	1.1332	1.12021	1.23258	1.18933	1.14437	1.26188	1.25321	1.19713	1.29434	1.27279	1.22488	1.37696	1.3381	1.27558	1.37698	1.33546	1.27421	1.42062	1.37708	1.31532
25.1833	1.04885	1.06522	1.04041	1.16572	1.13938	1.12719	1.22294	1.1903	1.1432	1.2824	1.24432	1.18993	1.30699	1.26411	1.23366	1.37528	1.31737	1.26205	1.35818	1.32983	1.28118	1.41744	1.3822	1.30292
25.2833	1.04962	1.0697	1.04013	1.16051	1.13418	1.12799	1.22726	1.19471	1.15208	1.26549	1.24835	1.17962	1.29687	1.27169	1.22577	1.3778	1.32188	1.26371	1.37225	1.3393	1.27628	1.40692	1.39063	1.29962
25.3833	1.06075	1.07559	1.03733	1.15665	1.13053	1.12179	1.23589	1.19568	1.14359	1.27298	1.25377	1.17406	1.30432	1.25929	1.22933	1.35666	1.32456	1.26639	1.36765	1.34411	1.28492	1.41356	1.37086	1.30793
25.4833	1.05611	1.07896	1.04209	1.17181	1.1391	1.11995	1.23546	1.19168	1.15899	1.26812	1.23418	1.18518	1.29124	1.26342	1.23226	1.37318	1.31568	1.25375	1.36013	1.3393	1.27344	1.40844	1.37874	1.31268
25.5833	1.06245	1.07321	1.04321	1.15263	1.12533	1.11573	1.23877	1.19375	1.16082	1.26688	1.24988	1.18342	1.29602	1.27761	1.22514	1.36534	1.3247	1.26371	1.36166	1.33944	1.27744	1.4036	1.38275	1.31506
25.6833	1.07125	1.07938	1.03775	1.15397	1.12589	1.12706	1.2333	1.19872	1.1539	1.28074	1.24821	1.17772	1.30038	1.26645	1.23137	1.36044	1.32343	1.25822	1.35957	1.32983	1.27641	1.40817	1.38386	1.30094
25.7833	1.0575	1.07279	1.03566	1.15828	1.12772	1.13154	1.23747	1.18629	1.15325	1.27838	1.24307	1.18966	1.30165	1.26356	1.2315	1.36856	1.324	1.26907	1.36988	1.32846	1.2786	1.42255	1.37335	1.31413
25.8833	1.05936	1.08554	1.03118	1.16468	1.13179	1.13273	1.23704	1.18615	1.14712	1.26161	1.24391	1.18328	1.30868	1.25805	1.22959	1.3701	1.31751	1.2692	1.35051	1.35152	1.28517	1.41246	1.38496	1.31532
25.9833	1.05055	1.07433	1.03636	1.16274	1.13881	1.12785	1.23172	1.18781	1.14607	1.28739	1.2546	1.19183	1.29321	1.26852	1.22018	1.37654	1.31906	1.26026	1.36096	1.34589	1.2777	1.42587	1.38192	1.29606
26.0833	1.05179	1.07307	1.03636	1.15932	1.13306	1.12166	1.22366	1.20714	1.14946	1.27367	1.24557	1.17976	1.30123	1.26838	1.23442	1.3694	1.33034	1.25771	1.365	1.33216	1.27795	1.42241	1.3775	1.31862
26.1833	1.0558	1.07475	1.03845	1.15338	1.13544	1.11995	1.23258	1.18974	1.13955	1.27006	1.24779	1.19292	1.29588	1.25694	1.23366	1.36814	1.32653	1.25643	1.36821	1.32873	1.27499	1.41744	1.38911	1.30991
26.2833	1.0538	1.07713	1.04558	1.15248	1.13643	1.12443	1.231	1.1867	1.16199	1.26674	1.24196	1.1803	1.29096	1.2557	1.22641	1.36604	1.32188	1.2669	1.36138	1.33148	1.2777	1.41232	1.39658	1.29725
26.3833	1.05828	1.07461	1.03118	1.16795	1.12617	1.12495	1.22999	1.18104	1.16134	1.28337	1.24585	1.17921	1.2956	1.26645	1.23239	1.3645	1.31836	1.25464	1.35943	1.33409	1.28053	1.41467	1.38579	1.30609
26.4833	1.06059	1.0826	1.04069	1.16497	1.13291	1.12614	1.23718	1.19112	1.1479	1.27367	1.23766	1.17365	1.29855	1.26576	1.2259	1.36772	1.31526	1.26894	1.35692	1.32818	1.28543	1.42075	1.38054	1.29949
26.5833	1.05457	1.08176	1.03887	1.17226	1.1346	1.12193	1.23085	1.18919	1.15508	1.27408	1.24474	1.17664	1.29898	1.26218	1.23022	1.36422	1.32245	1.25311	1.36556	1.32942	1.27834	1.41038	1.37376	1.30925
26.6833	1.05889	1.0812	1.03733	1.15992	1.12828	1.11573	1.23603	1.18629	1.15482	1.28254	1.25182	1.17718	1.29644	1.25198	1.21725	1.36604	1.31723	1.26192	1.36027	1.34013	1.27499	1.4256	1.3934	1.30648
26.7833	1.06584	1.08919	1.03943	1.15962	1.12196	1.1131	1.22985	1.19264	1.1462	1.26826	1.23585	1.17799	1.29996	1.25653	1.2259	1.35694	1.32668	1.25605	1.3657	1.34699	1.27331	1.41591	1.37349	1.31796
26.8833	1.06831	1.0948	1.04195	1.16066	1.12631	1.12351	1.23143	1.18532	1.13198	1.27492	1.23877	1.18505	1.30587	1.27058	1.22387	1.3673	1.32752	1.25873	1.35609	1.33711	1.28337	1.41232	1.37432	1.30622
26.9833	1.05781	1.08372	1.02923	1.1675	1.13671	1.12403	1.23201	1.18905	1.14281	1.26577	1.23932	1.18817	1.30376	1.27003	1.22997	1.368	1.31526	1.26639	1.36013	1.33175	1.26686	1.40305	1.36892	1.30437
27.0833	1.07264	1.07685	1.03664	1.15709	1.13249	1.12943	1.23042	1.18422	1.15286	1.27908	1.25307	1.18817	1.30967	1.26466	1.23213	1.36758	1.31244	1.26218	1.36486	1.33491	1.27899	1.42518	1.37957	1.29712
27.1833	1.06275	1.08428	1.03468	1.16245	1.13797	1.1185	1.23618	1.18298	1.14346	1.2745	1.25057	1.19116	1.29532	1.26149	1.21548	1.36968	1.31088	1.26409	1.36654	1.33024	1.27924	1.41204	1.37694	1.31967
27.2833	1.06044	1.07671	1.03146	1.16631	1.13334	1.11626	1.23891	1.19278	1.14516	1.26896	1.24238	1.18288	1.29673	1.25887	1.22094	1.35764	1.31286	1.2535	1.36472	1.3312	1.26738	1.41342	1.38289	1.3082
27.3833	1.05858	1.084	1.03929	1.16587	1.12013	1.12799	1.22481	1.17552	1.15116	1.27103	1.25641	1.17908	1.29968	1.26549	1.21751	1.3659	1.32794	1.26715	1.36904	1.32914	1.26738	1.42075	1.38884	1.31176
27.4833	1.06831	1.0833	1.03873	1.16334	1.12561	1.12285	1.2369	1.1954	1.14933	1.25925	1.23752	1.18193	1.28463	1.26314	1.22247	1.37808	1.31681	1.25171	1.37002	1.34397	1.27641	1.42325	1.37777	1.3016
27.5833	1.06445	1.0812	1.0516	1.15576	1.12997	1.12034	1.23805	1.1896	1.14424	1.28504	1.25724	1.17813	1.29124	1.25639	1.22132	1.37654	1.32132	1.25298	1.34731	1.32283	1.27615	1.4155	1.38759	1.2925
27.6833	1.06106	1.0819	1.03538	1.16973	1.13853	1.11666	1.23071	1.18519	1.14411	1.27519	1.24377	1.16361	1.29701	1.26232	1.2231	1.36646	1.31779	1.26179	1.37127	1.34754	1.26261	1.40346	1.39478	1.30543
27.7833	1.05951	1.0826	1.03076	1.16988	1.12378	1.11613	1.23201	1.19085	1.16121	1.28157	1.24238	1.18573	1.29096	1.26535	1.21891	1.35582	1.30933	1.26549	1.3657	1.34095	1.26944	1.409	1.38165	1.30529
27.8833	1.06384	1.08204	1.03971	1.173	1.12884	1.1185	1.23388	1.19016	1.15038	1.27589	1.24821	1.18681	1.3077	1.26232	1.22501	1.36702	1.31977	1.26511	1.35581	1.33875	1.27318	1.41301	1.39063	1.30846
27.9833	1.06291	1.08695	1.03048	1.17077	1.14134	1.11903	1.23201	1.18408	1.14659	1.27214	1.24016	1.18871	1.29279	1.2597	1.21878	1.36814	1.32583	1.25758	1.3625	1.33477	1.28002	1.40775	1.36989	1.31215
28.0833	1.06615	1.09087	1.04069	1.16854	1.14022	1.12693	1.23172	1.18118	1.15064	1.27783	1.24877	1.17419	1.30221	1.2659	1.22628	1.37192	1.32808	1.24813	1.36068	1.33807	1.26893	1.40761	1.38275	1.31097
28.1833	1.06028	1.07797	1.03524	1.18029	1.13853	1.12258	1.23704	1.19154	1.1492	1.27256	1.24168	1.18546	1.28421	1.26342	1.20988	1.36548	1.32569	1.25643	1.35274	1.32736	1.26544	1.40761	1.37224	1.30279
28.2833	1.06847	1.09255	1.03314	1.18519	1.14064	1.12535	1.22395	1.18063	1.15051	1.27991	1.24641	1.17311	1.28168	1.27072	1.23455	1.3708	1.32216	1.25081	1.35344	1.33669	1.2795	1.41688	1.37044	1.31295
28.3833	1.05982	1.08036	1.03775	1.1681	1.12294	1.11692	1.23747	1.18408	1.14555	1.26147	1.24682	1.17338	1.29194	1.26411	1.21738	1.37108	1.32245	1.24724	1.354	1.33107	1.26789	1.4166	1.37487	1.30094
28.4833	1.06553	1.08821	1.03873	1.15813	1.12378	1.12113	1.23013	1.19223	1.13433	1.2648	1.24363	1.18152	1.28899	1.26604	1.21967	1.36772	1.31779	1.24801	1.35483	1.33491	1.26531	1.40291	1.37625	1.30635
28.5833	1.0711	1.08246	1.04139	1.16497	1.12968	1.11284	1.22553	1.18712	1.13119	1.27519	1.24932	1.18098	1.30277	1.25722	1.2245	1.36324	1.32386	1.25247	1.36277	1.34987	1.25887	1.42587	1.39229	1.3074
28.6833	1.05997	1.0805	1.04293	1.1672	1.12772	1.12285	1.23359	1.1856	1.15077	1.27339	1.24029	1.17813	1.30924	1.27899	1.21891	1.36618	1.32851	1.25541	1.36222	1.33916	1.2706	1.4137	1.38234	1.30477
28.7833	1.06831	1.08414	1.04167	1.16066	1.145	1.11297	1.23272	1.19899	1.14503	1.27547	1.23516	1.17338	1.28857	1.26011	1.22043	1.36184	1.3185	1.24303	1.35929	1.32489	1.25642	1.41342	1.38165	1.29883
28.8833	1.07774	1.09157	1.04069	1.16572	1.13151	1.12219	1.24352	1.19361	1.14751	1.26438	1.24918	1.17948	1.29124	1.26397	1.22437	1.3645	1.31384	1.25005	1.35762	1.33683	1.26764	1.41688	1.39188	1.30622
28.9833	1.06059	1.08372	1.03594	1.17523	1.12968	1.12575	1.22611	1.19264	1.13628	1.2666	1.2446	1.17066	1.30066	1.25763	1.22209	1.36072	1.31173	1.25081	1.36027	1.32585	1.26906	1.42629	1.38151	1.29725
29.0833	1.06538	1.07559	1.03496	1.15665	1.13488	1.12588	1.22567	1.19996	1.13524	1.26258	1.24071	1.1765	1.2949	1.25873	1.21242	1.35554	1.31568	1.2406	1.35636	1.34273	1.27254	1.41494	1.37722	1.29844
29.1833	1.07511	1.09003	1.04055	1.16601	1.13207	1.11639	1.23891	1.19582	1.14242	1.277	1.24863	1.16958	1.30362	1.27003	1.21179	1.36338	1.31399	1.24775	1.3533	1.33312	1.26493	1.41453	1.3775	1.30134
29.2833	1.06924	1.08414	1.03314	1.17107	1.12561	1.12061	1.23143	1.20024	1.13889	1.26036	1.24779	1.16999	1.29152	1.26204	1.22171	1.35834	1.31455	1.23933	1.3625	1.3345	1.26815	1.41494	1.38745	1.30384
29.3833	1.06368	1.09368	1.03244	1.16215	1.1509	1.11956	1.22524	1.18905	1.13628	1.26743	1.24349	1.18654	1.28829	1.26094	1.21497	1.35918	1.31074	1.25401	1.34898	1.33944	1.26493	1.40789	1.38109	1.30886
29.4833	1.06646	1.07601	1.03594	1.16646	1.15005	1.11455	1.23402	1.19361	1.15925	1.26438	1.24321	1.18043	1.29729	1.25364	1.2226	1.3547	1.32456	1.24813	1.36723	1.36113	1.26983	1.43085	1.38413	1.28762
29.5833	1.06646	1.08569	1.03887	1.17939	1.13727	1.11191	1.23546	1.19168	1.14607	1.2763	1.23877	1.16686	1.28519	1.26645	1.21446	1.35568	1.31568	1.24558	1.36013	1.33903	1.2657	1.41647	1.38427	1.30398
29.6833	1.0626	1.08442	1.04055	1.16839	1.1478	1.11797	1.23042	1.19513	1.15064	1.26798	1.25779	1.18016	1.28941	1.26438	1.22094	1.36982	1.32019	1.24354	1.3526	1.34301	1.26828	1.41176	1.38579	1.30754
29.7833	1.0748	1.09017	1.04838	1.17256	1.13966	1.11428	1.23042	1.18767	1.14973	1.28337	1.23571	1.17881	1.29377	1.2721	1.20403	1.36758	1.31596	1.26001	1.35887	1.33107	1.26403	1.41799	1.37266	1.29896
29.8833	1.08021	1.08442	1.05006	1.16438	1.14233	1.12166	1.22985	1.18864	1.13459	1.27755	1.24932	1.16483	1.29152	1.26011	1.21942	1.3673	1.31201	1.2503	1.34828	1.33381	1.26777	1.41107	1.37805	1.29975
32.25	1.07388			1.16824			1.23791			1.26577			1.29968			1.36226			1.35678			1.43058
32.35	1.07295			1.17493			1.23402			1.27395			1.29785			1.35484			1.36208			1.43611
32.45	1.07418			1.1727			1.23186			1.26688			1.29251			1.37136			1.35845			1.42532
32.55	1.07944			1.17122			1.23546			1.2745			1.29869			1.35932			1.35636			1.42643
32.65	1.07434			1.17226			1.2333			1.28421			1.28674			1.36618			1.35441			1.42753
32.75	1.07681			1.17092			1.24294			1.27727			1.28674			1.36814			1.36417			1.42712
32.85	1.0884			1.18326			1.23819			1.27311			1.29377			1.3617			1.35873			1.43127
32.95	1.08222			1.17984			1.23834			1.27991			1.29602			1.3687			1.36138			1.42214
33.05	1.07604			1.1736			1.23776			1.27589			1.29208			1.36338			1.35678			1.44054
33.15	1.08005			1.16928			1.24006			1.28448			1.29448			1.36884			1.36403			1.44178
33.25	1.08021			1.17107			1.23488			1.27408			1.29448			1.36408			1.36054			1.43113
33.35	1.06986			1.17731			1.2392			1.26798			1.28702			1.3547			1.35163			1.42283
33.45	1.08036			1.17657			1.22841			1.2641			1.28998			1.35596			1.35581			1.43556
33.55	1.08175			1.16928			1.24424			1.27852			1.29659			1.37933			1.35999			1.43334
33.65	1.07171			1.1843			1.2438			1.27478			1.29827			1.36478			1.36194			1.43279
33.75	1.08438			1.17464			1.24467			1.28656			1.29279			1.36086			1.35553			1.42643
33.85	1.07542			1.1846			1.23431			1.27464			1.29124			1.35736			1.36542			1.4321
33.95	1.08392			1.17166			1.2274			1.27921			1.29152			1.37514			1.35079			1.43874
34.05	1.08855			1.18817			1.23143			1.27949			1.28463			1.3708			1.36695			1.4404
34.15	1.08608			1.17241			1.2392			1.27963			1.29293			1.38031			1.3526			1.43321
34.25	1.07557			1.17479			1.24064			1.27506			1.2918			1.36786			1.35748			1.43473
34.35	1.0833			1.1849			1.23992			1.27977			1.29448			1.35274			1.35971			1.43334
34.45	1.07418			1.18415			1.21862			1.27575			1.28379			1.36898			1.35943			1.44206
34.55	1.08531			1.17375			1.22409			1.27464			1.28744			1.3652			1.35023			1.43819
34.65	1.07619			1.1733			1.2346			1.27686			1.2873			1.3582			1.35414			1.43833
34.75	1.08237			1.18252			1.23488			1.28407			1.29096			1.3582			1.35497			1.43473
34.85	1.08685			1.17716			1.23834			1.26951			1.30109			1.37556			1.34898			1.43514
34.95	1.07696			1.17553			1.23201			1.26674			1.2949			1.37066			1.36681			1.42394
35.05	1.0714			1.17107			1.23862			1.27838			1.28533			1.36086			1.37295			1.43085
35.15	1.0748			1.16973			1.23949			1.28032			1.3001			1.35988			1.365			1.43238
35.25	1.08361			1.18668			1.22596			1.26785			1.28857			1.36968			1.35985			1.42684
35.35	1.08314			1.1727			1.22769			1.26882			1.28674			1.36156			1.35734			1.43736
35.45	1.09257			1.17538			1.23747			1.27977			1.2918			1.36128			1.34996			1.44358
35.55	1.08438			1.1736			1.23244			1.28018			1.29321			1.36254			1.37364			1.42767
35.65	1.0782			1.18802			1.22179			1.28157			1.29546			1.36828			1.36514			1.42975
35.75	1.09149			1.18162			1.2333			1.27977			1.2821			1.36352			1.35595			1.42269
35.85	1.08948			1.18237			1.23992			1.27894			1.28393			1.36422			1.36013			1.42504
35.95	1.08191			1.18281			1.23647			1.27048			1.29476			1.35652			1.3448			1.43058
36.05	1.07959			1.18118			1.23862			1.28282			1.29096			1.36212			1.35414			1.43099
36.15	1.07357			1.1843			1.2287			1.26438			1.29757			1.35344			1.35985			1.43763
36.25	1.09674			1.18356			1.23445			1.27062			1.29757			1.35554			1.35427			1.42518
36.35	1.08175			1.18207			1.2333			1.27783			1.279			1.36548			1.35623			1.43293
36.45	1.0884			1.19396			1.22798			1.27492			1.28913			1.35904			1.34759			1.42906
36.55	1.08469			1.18772			1.22956			1.27713			1.2835			1.35988			1.35692			1.44247
36.65	1.07975			1.18445			1.23042			1.27395			1.27633			1.36618			1.35539			1.42214
36.75	1.08809			1.18296			1.24639			1.26826			1.28604			1.35456			1.3611			1.43417
36.85	1.0816			1.18638			1.22798			1.27422			1.29307			1.3659			1.35553			1.43667
36.95	1.07341			1.17404			1.22798			1.27852			1.29771			1.36226			1.34954			1.42587
37.05	1.0918			1.19486			1.2238			1.27506			1.28182			1.35736			1.35386			1.42477
37.15	1.08345			1.17538			1.22913			1.26729			1.29068			1.3589			1.35093			1.42311
37.25	1.08654			1.18846			1.23042			1.27672			1.29321			1.35176			1.34982			1.4173
37.35	1.08994			1.18311			1.23186			1.26507			1.28111			1.35386			1.35288			1.4285
37.45	1.08114			1.17493			1.21963			1.2831			1.29138			1.36506			1.35358			1.4274
37.55	1.08129			1.16765			1.22582			1.2702			1.29138			1.35218			1.36556			1.4238
37.65	1.08361			1.184			1.23589			1.26688			1.28337			1.36604			1.3526			1.43072
37.75	1.07434			1.1849			1.23575			1.26882			1.29068			1.36548			1.35497			1.4368
37.85	1.08608			1.17791			1.22697			1.27589			1.27338			1.3673			1.35706			1.41522
37.95	1.08438			1.18906			1.22754			1.28628			1.2783			1.35582			1.36695			1.42823
38.05	1.07944			1.17047			1.23762			1.28046			1.28716			1.3589			1.35497			1.4386
38.15	1.08314			1.17776			1.22323			1.28823			1.28013			1.35092			1.34494			1.43514
38.25	1.08932			1.18609			1.22438			1.27034			1.28702			1.35106			1.34703			1.42159
38.35	1.09241			1.18534			1.22553			1.28129			1.28477			1.34826			1.34787			1.42864
38.45	1.07774			1.17508			1.22668			1.27353			1.27914			1.35638			1.35567			1.44123
38.55	1.09087			1.19025			1.22956			1.27506			1.28308			1.35148			1.35079			1.4368
38.65	1.08793			1.17583			1.23373			1.27201			1.29434			1.35946			1.35483			1.43127
38.75	1.09303			1.17746			1.2238			1.27228			1.27211			1.34742			1.3533			1.42546
38.85	1.08747			1.19084			1.23934			1.28213			1.28913			1.35148			1.34689			1.43182
38.95	1.08314			1.17642			1.22049			1.27034			1.28998			1.35624			1.35218			1.44137
39.05	1.09133			1.17657			1.22884			1.27436			1.28702			1.35848			1.3409			1.41591
39.15	1.08732			1.18579			1.23589			1.26632			1.28111			1.36646			1.34675			1.43099
39.25	1.09674			1.18727			1.22711			1.26923			1.29237			1.35176			1.3572			1.43348
39.35	1.08392			1.18133			1.23531			1.26632			1.28463			1.3519			1.35664			1.42657
39.45	1.08623			1.18921			1.23503			1.26535			1.28407			1.35988			1.3501			1.42159
39.55	1.07789			1.18712			1.23157			1.27561			1.29026			1.35078			1.34856			1.43473
39.65	1.09056			1.19842			1.22683			1.26798			1.27296			1.35484			1.35135			1.43722
39.75	1.08577			1.18534			1.23546			1.26091			1.28168			1.34421			1.3402			1.42892
39.85	1.07805			1.17464			1.22323			1.26701			1.28829			1.35232			1.34633			1.42961
39.95	1.08392			1.18475			1.22294			1.27353			1.29982			1.34686			1.35274			1.43016
40.05	1.09149			1.18415			1.22898			1.28171			1.29152			1.33931			1.35079			1.43113
40.15	1.08454			1.18757			1.23575			1.2709			1.28716			1.3505			1.35957			1.43155
40.25	1.10122			1.19069			1.23085			1.27603			1.29504			1.34588			1.34842			1.42684
40.35	1.08484			1.18876			1.23704			1.26965			1.28154			1.34574			1.35623			1.42726
40.45	1.08623			1.18935			1.23834			1.25939			1.27507			1.35036			1.34452			1.44081
40.55	1.08994			1.17508			1.21934			1.27658			1.27985			1.35302			1.3611			1.43293
40.65	1.09519			1.18846			1.22495			1.26937			1.28829			1.36142			1.34201			1.42615
40.75	1.09643			1.18341			1.22423			1.26022			1.27619			1.34924			1.34508			1.4274
40.85	1.09164			1.19144			1.23488			1.27034			1.2859			1.34434			1.33282			1.42878
40.95	1.09025			1.18267			1.23013			1.2666			1.28168			1.34407			1.34187			1.4238
41.05	1.08361			1.1733			1.21934			1.26757			1.28618			1.35428			1.35149			1.43141
41.15	1.08608			1.17731			1.22049			1.26355			1.2835			1.35596			1.3409			1.4404
41.25	1.08932			1.18861			1.22884			1.27048			1.2918			1.3414			1.34591			1.43487
41.35	1.09195			1.19411			1.22409			1.27173			1.27676			1.36282			1.34564			1.42823
41.45	1.09813			1.17806			1.2369			1.26563			1.28744			1.34448			1.34452			1.42753
41.55	1.0955			1.17925			1.21862			1.27076			1.28998			1.35484			1.33909			1.41979
41.65	1.09272			1.18623			1.22222			1.27048			1.29054			1.34812			1.34577			1.43459
41.75	1.08948			1.17449			1.22985			1.27921			1.28604			1.35316			1.33951			1.44759
41.85	1.0884			1.17493			1.23071			1.26244			1.28491			1.35078			1.34452			1.43749
41.95	1.08994			1.1782			1.21833			1.26729			1.27071			1.3512			1.33658			1.42255
42.05	1.08376			1.16378			1.22495			1.28088			1.27619			1.35288			1.33937			1.4368
42.15	1.09689			1.18311			1.22769			1.2745			1.27858			1.3512			1.35372			1.43846
42.25	1.10075			1.18103			1.21819			1.27963			1.27183			1.34686			1.34647			1.4339

## Sheet: right graph
val (nM)	0	1	10	100
Time
0	1.48535	1.42849	1.45121	1.4402
0.083333	1.47524	1.41523	1.41413	1.44124
0.166667	1.48361	1.38591	1.3859	1.40602
0.25	1.44075	1.35311	1.36753	1.37044
0.333333	1.43552	1.34752	1.35971	1.35718
0.416667	1.39755	1.32937	1.35494	1.3237
0.5	1.3735	1.32239	1.33181	1.31847
0.95	1.01706	1.00584	1.00966	0.99757
1.03333	0.999989	1.01143	1.01374	0.983967
1.11667	0.995807	1.00724	0.995371	1.0042
1.2	1.00382	1.0041	0.987887	0.996523
1.28333	1.0195	1.01945	1.00422	0.989896
1.36667	1.02124	1.01387	1.00524	1.00001
1.45	1.00731	1.0198	1.00898	1.00699
1.53333	1.01636	1.02713	1.02463	1.0028
1.61667	1.01393	1.01945	1.01476	1.01048
1.7	1.02995	1.01945	1.02225	0.995826
1.78333	1.02856	1.01492	1.01408	1.00629
1.86667	1.01358	1.00968	1.01136	1.01675
1.95	1.00905	1.00235	1.0032	1.01501
2.03333	1.02055	1.00968	1.01204	1.01396
2.11667	1.01671	1.0191	0.996392	1.01187
2.2	1.01915	0.984203	1.01068	1.01048
2.28333	0.999292	1.02085	1.00694	1.00175
2.36667	1.00591	1.00549	0.999113	0.990594
2.45	0.999292	0.987693	1.00932	1.01117
2.53333	1.01323	1.00724	1.01238	1.01396
2.61667	1.00034	0.990136	0.99299	1.01117
2.7	1.00626	1.00235	0.998773	0.999314
2.78333	0.988839	1.00619	1.00626	0.996175
2.86667	1.00208	0.997465	1.00184	1.00315
2.95	0.993368	1.01387	0.996392	1.00734
3.03333	1.00417	1.00933	0.998773	1.00699
3.11667	0.994762	1.00584	1.01034	1.00141
3.2	1.01393	1.00619	1.00252	1.00385
3.28333	0.983264	1.02329	0.976661	0.993384
3.36667	0.983961	0.995022	0.987547	1.00106
3.45	0.998246	0.983156	0.99367	0.995128
3.53333	0.995459	1.0034	0.997753	0.995826
3.61667	0.990929	1.00061	1.00115	0.996523
3.7	0.996156	0.995371	0.997072	0.987455
3.78333	1.00452	0.968498	0.996392	1.00106
3.86667	0.99755	0.998861	1.00796	0.996872
3.95	0.999989	0.990485	0.981424	1.00943
4.03333	0.996504	1.01527	0.979723	1.01292
4.11667	0.999292	0.986297	0.99265	0.983269
4.2	0.996504	0.994673	1.00081	1.00141
4.28333	0.995459	0.992928	0.996392	1.00175
4.36667	0.990233	0.991532	0.991969	1.00001
4.45	0.99755	0.990136	1.01	0.986408
4.53333	0.999989	0.993626	0.989248	1.00524
4.61667	1.01079	1.0041	0.990269	0.990594
4.7	0.998943	0.986995	0.999113	0.991291
4.78333	0.995111	0.986995	0.991629	0.993035
4.86667	0.999292	0.977223	0.991629	0.992687
4.95	0.971766	0.987693	1.02293	1.00978
5.03333	0.9864	1.01073	0.991629	0.994082
5.11667	1.00278	0.980015	0.989928	1.01013
5.2	0.993368	0.990136	1.00558	1.02164
5.28333	0.990581	0.99572	0.990949	0.993035
5.36667	0.974553	0.976525	0.997412	0.99164
5.45	0.984309	1.00863	1.00013	0.976991
5.53333	0.975599	0.984552	0.989588	1.02338
5.61667	0.983264	0.995371	0.99231	0.990594
5.7	0.982567	0.99223	1.00286	0.985013
5.78333	0.98849	0.983156	0.987207	0.993035
5.86667	0.99755	0.997116	0.986867	0.986059
5.95	0.985006	0.979317	0.999453	0.979781
6.6	1.08919	1.0917	1.10355	1.16046
6.68333	1.0979	1.08472	1.15968	1.20545
6.76667	1.12089	1.09519	1.21411	1.2229
6.85	1.10208	1.11299	1.20935	1.20057
6.93333	1.08431	1.13637	1.22397	1.21278
7.01667	1.09441	1.15452	1.22431	1.20859
7.1	1.11079	1.15452	1.21887	1.20511
7.18333	1.09197	1.15766	1.22636	1.22603
7.26667	1.09894	1.15626	1.20901	1.21801
7.35	1.09232	1.15138	1.20935	1.23824
7.43333	1.07804	1.15975	1.21547	1.21627
7.51667	1.08048	1.16499	1.22805	1.21418
7.6	1.10312	1.16673	1.22533	1.2201
7.68333	1.10208	1.17127	1.2056	1.23336
7.76667	1.09163	1.15906	1.22567	1.22708
7.85	1.09128	1.15766	1.21207	1.22324
7.93333	1.09128	1.15382	1.22533	1.21592
8.01667	1.09999	1.14405	1.23384	1.23615
8.1	1.10939	1.15801	1.21037	1.21697
8.18333	1.10347	1.14963	1.23452	1.21208
8.26667	1.09685	1.14963	1.22295	1.22115
8.35	1.10905	1.14405	1.22704	1.23999
8.43333	1.17629	1.15696	1.22805	1.2372
8.51667	1.10626	1.16255	1.23316	1.21138
8.6	1.11009	1.14056	1.25969	1.22848
8.68333	1.12751	1.16464	1.22976	1.22708
8.76667	1.11149	1.14649	1.22465	1.22917
8.85	1.11079	1.16569	1.22023	1.23789
8.93333	1.10312	1.16394	1.23418	1.23964
9.01667	1.10905	1.17162	1.23724	1.22499
9.1	1.11915	1.1423	1.23486	1.23266
9.18333	1.11288	1.17162	1.22397	1.23022
9.26667	1.10765	1.14789	1.22533	1.23127
9.35	1.11114	1.17022	1.22295	1.21313
9.43333	1.10417	1.15801	1.22704	1.24243
9.51667	1.09163	1.16499	1.25017	1.23266
9.6	1.10835	1.15033	1.23894	1.23266
9.68333	1.1073	1.15208	1.23282	1.23894
9.76667	1.10905	1.16464	1.25119	1.23336
9.85	1.1073	1.17197	1.23452	1.2494
9.93333	1.10591	1.16778	1.242	1.24278
10.0167	1.12229	1.1601	1.2369	1.23022
10.1	1.10347	1.1629	1.23418	1.22045
10.1833	1.10556	1.17651	1.23656	1.23336
10.2667	1.10382	1.15557	1.2284	1.23231
10.35	1.10591	1.18663	1.23894	1.21662
10.4333	1.08988	1.17546	1.22363	1.24836
10.5167	1.11358	1.17686	1.23214	1.2358
10.6	1.09581	1.1608	1.23792	1.21627
10.6833	1.10905	1.16429	1.23214	1.25429
10.7667	1.11671	1.17755	1.24609	1.23092
10.85	1.11079	1.16883	1.22942	1.22394
10.9333	1.11358	1.16569	1.21275	1.22499
11.0167	1.09372	1.15801	1.21207	1.21662
11.1	1.11079	1.17965	1.24336	1.23406
11.1833	1.10765	1.18209	1.22533	1.22429
11.2667	1.10835	1.16883	1.23928	1.21662
11.35	1.0972	1.15452	1.21207	1.21801
11.4333	1.10452	1.1622	1.23146	1.2208
11.5167	1.11149	1.1451	1.21819	1.22917
11.6	1.09999	1.16883	1.22771	1.22499
11.6833	1.11009	1.16045	1.22771	1.21313
11.7667	1.11183	1.16534	1.22193	1.23371
11.85	1.11218	1.1615	1.24098	1.21104
11.9333	1.10626	1.16429	1.2301	1.22045
12.0167	1.09023	1.16743	1.2318	1.20441
12.1	1.0871	1.16429	1.23588	1.21766
12.1833	1.09232	1.16534	1.25187	1.2351
12.2667	1.1087	1.17197	1.23792	1.20894
12.35	1.10243	1.1807	1.23452	1.23092
12.4333	1.10974	1.16115	1.22704	1.22987
12.5167	1.11218	1.1779	1.25935	1.22952
12.6	1.11811	1.16185	1.23588	1.22115
12.6833	1.10521	1.17092	1.25153	1.20615
12.7667	1.11183	1.16255	1.21887	1.22429
12.85	1.10696	1.17546	1.23792	1.22185
12.9333	1.12612	1.17092	1.21921	1.20511
13.0167	1.11288	1.17511	1.22908	1.21418
13.1	1.12612	1.15277	1.23588	1.21627
13.1833	1.11218	1.15487	1.22738	1.21138
13.2667	1.10068	1.16045	1.2284	1.21418
13.35	1.10556	1.1622	1.21479	1.21906
13.4333	1.11567	1.16255	1.23078	1.22185
13.5167	1.11845	1.16534	1.22261	1.23231
13.6	1.13169	1.17441	1.20765	1.23196
13.6833	1.10626	1.16499	1.2267	1.20441
13.7667	1.11079	1.16429	1.22976	1.21836
13.85	1.10312	1.15557	1.22942	1.22534
13.9333	1.10417	1.15243	1.21309	1.23092
14.0167	1.11427	1.15871	1.23554	1.2215
14.1	1.10347	1.15452	1.22499	1.21906
14.1833	1.12856	1.15592	1.22397	1.23231
14.2667	1.12751	1.15941	1.21819	1.23406
14.35	1.11985	1.16743	1.22533	1.22324
14.4333	1.11009	1.15696	1.22908	1.21243
14.5167	1.11079	1.15452	1.21615	1.22917
14.6	1.11358	1.15871	1.22295	1.22045
14.6833	1.1195	1.15696	1.2267	1.23022
14.7667	1.10208	1.15592	1.20867	1.2372
14.85	1.09999	1.15906	1.22431	1.20859
14.9333	1.11183	1.15138	1.21921	1.23371
15.0167	1.11114	1.16604	1.23928	1.22115
15.1	1.11462	1.15557	1.22976	1.2208
15.1833	1.12577	1.143	1.2284	1.26301
15.2667	1.11358	1.14928	1.22704	1.22359
15.35	1.13413	1.15487	1.23214	1.24906
15.4333	1.10417	1.16673	1.22057	1.23789
15.5167	1.0972	1.15173	1.22363	1.22673
15.6	1.11741	1.16115	1.24234	1.23406
15.6833	1.10487	1.15208	1.22431	1.23615
15.7667	1.12054	1.15452	1.24064	1.23475
15.85	1.14041	1.16324	1.2318	1.23999
15.9333	1.11044	1.15941	1.2403	1.23406
16.0167	1.11114	1.17616	1.22261	1.23231
16.1	1.12124	1.16569	1.23826	1.2058
16.1833	1.11392	1.16115	1.22942	1.22499
16.2667	1.13448	1.1608	1.23214	1.2344
16.35	1.12333	1.17267	1.22023	1.24103
16.4333	1.12438	1.14021	1.22567	1.22115
16.5167	1.12438	1.15347	1.21479	1.23999
16.6	1.09999	1.15696	1.2335	1.21871
16.6833	1.11323	1.15243	1.2403	1.2201
16.7667	1.11811	1.1807	1.21887	1.21941
16.85	1.12891	1.13916	1.22295	1.22255
16.9333	1.10103	1.14824	1.21717	1.24173
17.0167	1.11811	1.15417	1.2386	1.23894
17.1	1.11149	1.15626	1.22465	1.24313
17.1833	1.13762	1.15626	1.22601	1.2372
17.2667	1.11636	1.14859	1.22567	1.22185
17.35	1.12124	1.15557	1.23588	1.23196
17.4333	1.11636	1.16499	1.242	1.2208
17.5167	1.12054	1.15487	1.23486	1.24975
17.6	1.10034	1.17755	1.22976	1.22917
17.6833	1.12542	1.15696	1.23384	1.23475
17.7667	1.11776	1.15312	1.20799	1.23964
17.85	1.1296	1.15417	1.23928	1.24626
17.9333	1.12821	1.15696	1.22431	1.23161
18.0167	1.11009	1.14719	1.22805	1.23685
18.1	1.13588	1.14091	1.24268	1.24696
18.1833	1.12473	1.16429	1.22874	1.23406
18.2667	1.11671	1.16115	1.24472	1.24068
18.35	1.1303	1.14824	1.22567	1.22743
18.4333	1.12403	1.1601	1.23724	1.23127
18.5167	1.11671	1.16918	1.22567	1.22673
18.6	1.10974	1.14649	1.23146	1.2372
18.6833	1.12612	1.15836	1.23588	1.2365
18.7667	1.12926	1.15452	1.22738	1.23057
18.85	1.12194	1.14649	1.23044	1.22883
18.9333	1.12821	1.14963	1.2386	1.22534
19.0167	1.11671	1.17127	1.23996	1.24452
19.1	1.13135	1.16359	1.2437	1.2372
19.1833	1.14598	1.15871	1.22874	1.22324
19.2667	1.12159	1.18244	1.22805	1.23266
19.35	1.1303	1.15941	1.24132	1.23371
19.4333	1.18849	1.17127	1.23214	1.23964
19.5167	1.14424	1.17965	1.23112	1.22673
19.6	1.13866	1.16569	1.24098	1.2372
19.6833	1.23239	1.15103	1.24234	1.2501
19.7667	1.13344	1.17686	1.23146	1.23266
19.85	1.12751	1.17721	1.23656	1.22813
19.9333	1.13692	1.16324	1.23622	1.22743
20.0167	1.13657	1.17022	1.22636	1.24975
20.1	1.13204	1.16883	1.24166	1.22568
20.1833	1.11358	1.16534	1.24302	1.22987
20.2667	1.12926	1.16708	1.24507	1.2372
20.35	1.12438	1.17162	1.22942	1.25219
20.4333	1.12926	1.16848	1.2267	1.23196
20.5167	1.12473	1.16569	1.22601	1.23266
20.6	1.13204	1.16115	1.23418	1.24138
20.6833	1.2303	1.1622	1.242	1.23824
20.7667	1.13239	1.17232	1.23588	1.23231
20.85	1.13692	1.14649	1.23622	1.26091
20.9333	1.14354	1.16499	1.24336	1.22255
21.0167	1.16932	1.17022	1.2386	1.24278
21.1	1.18431	1.1622	1.24609	1.23127
21.1833	1.16236	1.15766	1.23146	1.22638
21.2667	1.16061	1.16987	1.2403	1.24208
21.35	1.18047	1.16499	1.24098	1.25394
21.4333	1.1411	1.16918	1.23622	1.23545
21.5167	1.15992	1.16883	1.24268	1.23057
21.6	1.17142	1.17337	1.23826	1.22464
21.6833	1.16236	1.1622	1.24336	1.24731
21.7667	1.15922	1.15731	1.2665	1.22359
21.85	1.16131	1.15661	1.23622	1.2508
21.9333	1.16758	1.16429	1.2403	1.24592
22.0167	1.15574	1.16778	1.26854	1.24278
22.1	1.16201	1.16708	1.24438	1.24522
22.1833	1.16793	1.1622	1.25901	1.24347
22.2667	1.15608	1.16045	1.24642	1.23406
22.35	1.15295	1.18139	1.25425	1.2344
22.4333	1.16131	1.18139	1.23248	1.22568
22.5167	1.15016	1.16708	1.24711	1.22917
22.6	1.14493	1.16708	1.25799	1.24138
22.6833	1.1425	1.18593	1.25493	1.23161
22.7667	1.14563	1.16429	1.23928	1.23859
22.85	1.14006	1.17406	1.23962	1.24347
22.9333	1.14284	1.16394	1.24507	1.25917
23.0167	1.14424	1.17022	1.24575	1.23615
23.1	1.14563	1.18733	1.23826	1.25359
23.1833	1.13727	1.18768	1.22295	1.23161
23.2667	1.15365	1.19431	1.26173	1.23859
23.35	1.13518	1.16534	1.24847	1.23615
23.4333	1.15016	1.17511	1.26173	1.23406
23.5167	1.15504	1.16883	1.24881	1.2501
23.6	1.17211	1.16604	1.24813	1.23127
23.6833	1.15748	1.16673	1.24166	1.24173
23.7667	1.15469	1.17721	1.26479	1.24278
23.85	1.16375	1.16883	1.24507	1.23475
23.9333	1.16967	1.18698	1.25187	1.2351
24.0167	1.16689	1.16987	1.23758	1.24208
24.1	1.17629	1.18244	1.26309	1.2344
24.1833	1.17873	1.17686	1.25289	1.23406
24.2667	1.16619	1.1807	1.24064	1.23406
24.35	1.18396	1.17755	1.2403	1.25115
24.4333	1.17211	1.18663	1.2318	1.24452
24.5167	1.18988	1.17651	1.25663	1.24347
24.6	1.15713	1.17511	1.25085	1.2658
24.6833	1.1756	1.18209	1.24881	1.23406
24.7667	1.19581	1.17721	1.23996	1.25917
24.85	1.16723	1.17651	1.27194	1.23231
24.9333	1.1627	1.19186	1.26003	1.23301
25.0167	1.17699	1.1786	1.25561	1.2508
25.1	1.17246	1.16813	1.23112	1.23231
25.1833	1.18466	1.17755	1.24676	1.24487
25.2667	1.18361	1.19989	1.23452	1.23057
25.35	1.17072	1.18035	1.24881	1.26126
25.4333	1.16236	1.18523	1.24847	1.25464
25.5167	1.18291	1.18279	1.25221	1.23545
25.6	1.16863	1.16918	1.25323	1.25185
25.6833	1.16793	1.17406	1.26412	1.24975
25.7667	1.17037	1.1779	1.25935	1.24347
25.85	1.16828	1.18768	1.24676	1.24243
25.9333	1.17455	1.18558	1.24745	1.23266
26.0167	1.18187	1.17825	1.27092	1.24801
26.1	1.18814	1.17302	1.25425	1.24417
26.1833	1.17629	1.18244	1.24541	1.24836
26.2667	1.17211	1.18733	1.25357	1.23022
26.35	1.17908	1.17476	1.26616	1.23964
26.4333	1.16967	1.18209	1.26139	1.24208
26.5167	1.17107	1.19291	1.24166	1.2215
26.6	1.17107	1.16918	1.25323	1.24452
