# Supplementary material for: Towards a molecular mechanism underlying mitochondrial protein import through the TOM and TIM23 complexes
Source: eLife. 2022 Jun 8;11:e75426. doi: 10.7554/eLife.75426 (PMC9255969; doi:10.7554/eLife.75426)
Supplement: Figure 4—figure supplement 1—source data 2. [file elife-75426-fig4-figsupp1-data2.xlsx]

## Sheet: Mrp21 primary data
val (nM)	0	1	3.16	10	31.6	100	316	1000
Time
0	4.7e-06	4.7e-06	6.23e-05	9.63e-05	3.52e-06	4.7e-06	6.93e-05	4.11212e-05
0.1	1.06e-05	5.29e-05	2.35e-06	3.52e-06	7.05e-06	2.35e-06	2.35e-06	2.34978e-06
0.2	2.35e-06	1.76e-05	2.35e-06	3.52e-06	1.88e-05	1.41e-05	2.58e-05	2.46727e-05
0.3	3.52e-06	1.17e-06	2.82e-05	2.35e-06	3.52e-06	7.05e-06	1.17e-06	3.99463e-05
0.4	3.52e-06	1.76e-05	1.17e-06	2.23e-05	3.88e-05	1.17e-06	1.17e-06	1.29238e-05
0.5	3.05e-05	2.35e-06	1.17e-05	2.35e-06	1.76e-05	2.11e-05	5.87e-06	1.29238e-05
1.03333	0.000793	0.000909	0.0008	0.000793	0.000862	0.001412	0.001095	0.000773078
1.13333	0.000919	0.00086	0.000962	0.0007	0.000712	0.000841	0.001223	0.000943437
1.23333	0.000547	0.001114	0.000901	0.0009	0.000725	0.001069	0.00104	0.00128885
1.33333	0.000792	0.000941	0.00102	0.001136	0.000943	0.000983	0.001242	0.00112085
1.43333	0.000828	0.001001	0.000953	0.001262	0.000754	0.001171	0.001096	0.00111732
1.53333	0.000582	0.000975	0.00092	0.00055	0.000916	0.001493	0.00122	0.0011232
1.63333	0.001003	0.001225	0.00101	0.001003	0.000881	0.001369	0.001062	0.00119604
1.73333	0.000901	0.000806	0.000712	0.001205	0.000858	0.001641	0.001007	0.00110557
1.83333	0.001042	0.000799	0.000852	0.00102	0.001059	0.001189	0.000807	0.00143572
1.93333	0.001109	0.001016	0.001008	0.00092	0.00102	0.001249	0.00117	0.00116549
2.03333	0.001191	0.001128	0.001183	0.001142	0.000815	0.001601	0.0009	0.00131235
2.13333	0.000708	0.00107	0.000754	0.000943	0.000887	0.001224	0.00102	0.00140282
2.23333	0.000872	0.000979	0.001039	0.001026	0.001083	0.001673	0.001183	0.00132763
2.33333	0.001035	0.001021	0.00106	0.000973	0.000867	0.001314	0.000997	0.00110557
2.43333	0.0009	0.000862	0.000888	0.000869	0.000824	0.001791	0.001042	0.00127006
2.53333	0.000947	0.001061	0.001019	0.001136	0.00119	0.001371	0.001189	0.000988083
2.63333	0.000891	0.001242	0.001136	0.001405	0.000818	0.001473	0.00105	0.00144746
2.73333	0.001205	0.001252	0.000935	0.000968	0.000997	0.001336	0.001138	0.00136522
2.83333	0.000949	0.001101	0.000853	0.000905	0.001067	0.001558	0.000956	0.00130765
2.93333	0.000912	0.001197	0.001109	0.001053	0.000963	0.001688	0.001222	0.00148154
3.03333	0.000976	0.001189	0.000952	0.001182	0.00086	0.001474	0.00115	0.00161783
3.13333	0.001134	0.001149	0.001046	0.000952	0.00123	0.00159	0.000987	0.00147566
3.23333	0.001023	0.001328	0.001416	0.001314	0.000961	0.001614	0.001324	0.00142984
3.33333	0.001048	0.001107	0.000996	0.00105	0.001001	0.001608	0.001087	0.00129943
3.43333	0.001093	0.000758	0.001185	0.000979	0.000825	0.001237	0.00127	0.00144629
3.53333	0.001056	0.001162	0.0009	0.001075	0.000989	0.001455	0.001235	0.00165072
3.63333	0.00122	0.001335	0.001101	0.001474	0.000938	0.00143	0.001235	0.00148506
3.73333	0.00112	0.001444	0.001195	0.001259	0.001047	0.001141	0.001083	0.00125478
3.83333	0.000851	0.00108	0.00117	0.001209	0.000926	0.001413	0.001467	0.00145569
3.93333	0.001291	0.001373	0.00105	0.000813	0.000965	0.001668	0.001114	0.00148271
4.03333	0.001116	0.001023	0.000973	0.000861	0.001077	0.001798	0.001228	0.00147096
4.13333	0.001442	0.001099	0.001117	0.001107	0.001259	0.00142	0.001275	0.00165777
4.23333	0.001403	0.001423	0.001338	0.001023	0.001315	0.001771	0.001106	0.00117841
4.33333	0.001097	0.001306	0.000955	0.001215	0.001099	0.001865	0.00137	0.00146156
4.43333	0.001212	0.001422	0.001442	0.00103	0.000981	0.001859	0.001182	0.00130178
4.53333	0.000928	0.001297	0.001241	0.001256	0.001205	0.001786	0.001255	0.00164602
4.63333	0.001283	0.001184	0.001613	0.001221	0.001091	0.001682	0.001689	0.00147566
4.73333	0.001155	0.001311	0.00127	0.001485	0.000987	0.001705	0.00095	0.00177526
4.83333	0.001221	0.001377	0.001146	0.001163	0.00102	0.001755	0.001599	0.00127946
4.93333	0.001263	0.001322	0.001242	0.001494	0.001033	0.001937	0.001108	0.00132763
5.03333	0.001107	0.001329	0.001232	0.001365	0.001057	0.001968	0.001584	0.00152971
5.13333	0.001355	0.001574	0.001331	0.00124	0.000976	0.001287	0.001131	0.00145099
5.23333	0.001009	0.001133	0.001148	0.001272	0.001222	0.001879	0.001445	0.00121366
5.33333	0.001383	0.00114	0.001274	0.001309	0.000928	0.001725	0.001319	0.00136522
5.43333	0.001168	0.001512	0.001332	0.001202	0.001019	0.001787	0.001736	0.00166952
5.53333	0.001364	0.001443	0.001583	0.00116	0.001042	0.001352	0.001359	0.00144159
5.63333	0.001335	0.001691	0.001124	0.001391	0.00118	0.001733	0.001236	0.00162957
5.73333	0.00107	0.001679	0.001167	0.001222	0.001104	0.002023	0.001432	0.00144042
5.83333	0.001319	0.001297	0.001203	0.001128	0.001518	0.001903	0.001209	0.00170947
5.93333	0.001021	0.00143	0.001352	0.001151	0.000923	0.001874	0.001567	0.00158023
6.03333	0.001416	0.00151	0.001352	0.001388	0.00127	0.001926	0.001618	0.00176469
6.56667	0.030531	0.037994	0.03347	0.027747	0.020423	0.036876	0.017017	0.0171499
6.66667	0.045602	0.054683	0.047256	0.042656	0.028886	0.039617	0.022041	0.0204043
6.76667	0.06203	0.072072	0.069389	0.057264	0.040703	0.045716	0.024238	0.0226448
6.86667	0.079293	0.088621	0.088683	0.076377	0.05379	0.049052	0.028631	0.0274889
6.96667	0.099594	0.112126	0.106545	0.093457	0.064942	0.055301	0.030969	0.0304908
7.06667	0.117612	0.133039	0.131621	0.108558	0.077926	0.059388	0.034254	0.033838
7.16667	0.134111	0.152806	0.136252	0.133752	0.092728	0.065915	0.038319	0.0357049
7.26667	0.155458	0.167462	0.159728	0.153931	0.110742	0.067576	0.042022	0.0376341
7.36667	0.183516	0.181538	0.183498	0.169181	0.126257	0.072625	0.045402	0.0388384
7.46667	0.201932	0.207783	0.207743	0.180212	0.141507	0.080274	0.046799	0.0415935
7.56667	0.220368	0.227572	0.236615	0.201933	0.159744	0.085046	0.048464	0.0447175
7.66667	0.236753	0.249457	0.233423	0.227561	0.167213	0.09192	0.054502	0.0461227
7.76667	0.268178	0.265315	0.258161	0.24437	0.188049	0.095905	0.055677	0.0493642
7.86667	0.290256	0.27904	0.284687	0.264001	0.194925	0.099801	0.058138	0.0513815
7.96667	0.300906	0.300188	0.294668	0.279322	0.226613	0.107403	0.061301	0.0520676
8.06667	0.319804	0.316998	0.301572	0.305349	0.238168	0.111218	0.062541	0.0571808
8.16667	0.330337	0.328221	0.323525	0.302406	0.255991	0.11689	0.065389	0.0551764
8.26667	0.364401	0.341818	0.348651	0.317915	0.27306	0.124332	0.070101	0.0582147
8.36667	0.388252	0.358238	0.358063	0.357041	0.274445	0.130023	0.07018	0.0602977
8.46667	0.391194	0.399113	0.382965	0.361053	0.302405	0.128699	0.075486	0.0613669
8.56667	0.401499	0.391302	0.393016	0.397415	0.32605	0.14281	0.076932	0.0639881
8.66667	0.41086	0.408138	0.401448	0.401391	0.333917	0.150446	0.077068	0.0642536
8.76667	0.432149	0.437889	0.422769	0.414537	0.332744	0.147361	0.080429	0.0640104
8.86667	0.463512	0.433484	0.427902	0.414465	0.360848	0.15765	0.083818	0.0657351
8.96667	0.450558	0.453258	0.435751	0.459134	0.354355	0.162506	0.086171	0.0698684
9.06667	0.479205	0.455627	0.455023	0.48224	0.38578	0.165602	0.087326	0.0690542
9.16667	0.47614	0.481511	0.47236	0.46087	0.402488	0.163446	0.092571	0.0705075
9.26667	0.511049	0.487533	0.490209	0.488013	0.39665	0.174823	0.091593	0.0720631
9.36667	0.530755	0.504672	0.51609	0.507017	0.411881	0.166541	0.094803	0.0742402
9.46667	0.533666	0.509446	0.508869	0.507017	0.43351	0.177646	0.096914	0.0788469
9.56667	0.531803	0.536547	0.510505	0.508117	0.446951	0.198061	0.101321	0.0762563
9.66667	0.548439	0.549743	0.536732	0.540957	0.458344	0.192762	0.102798	0.0794872
9.76667	0.573212	0.546671	0.535064	0.560711	0.45567	0.187464	0.105174	0.0793098
9.86667	0.587827	0.56851	0.546725	0.559891	0.466544	0.206531	0.105981	0.0802697
9.96667	0.583051	0.558017	0.573349	0.577416	0.481252	0.208376	0.111546	0.0799537
10.0667	0.608951	0.572957	0.570923	0.574733	0.482213	0.22409	0.112882	0.082126
10.1667	0.619306	0.573979	0.56683	0.602433	0.483062	0.207623	0.112344	0.0826442
10.2667	0.602014	0.560616	0.58981	0.618776	0.508412	0.216411	0.1137	0.0844229
10.3667	0.623833	0.606267	0.576094	0.632701	0.502888	0.209712	0.116482	0.0848694
10.4667	0.653693	0.623954	0.602369	0.633072	0.530955	0.225098	0.117961	0.0852912
10.5667	0.661891	0.613866	0.595377	0.605757	0.535265	0.216828	0.120699	0.0871945
10.6667	0.654184	0.646582	0.626823	0.620562	0.564555	0.235541	0.119549	0.0904584
10.7667	0.688884	0.661864	0.632484	0.647319	0.544464	0.232245	0.12431	0.0882672
10.8667	0.653668	0.611766	0.646363	0.655844	0.545718	0.245997	0.124592	0.0888828
10.9667	0.68047	0.636098	0.634844	0.662443	0.560285	0.234375	0.120621	0.090671
11.0667	0.684434	0.673333	0.632376	0.668134	0.566344	0.246916	0.129471	0.0907321
11.1667	0.690842	0.655468	0.660921	0.680458	0.561877	0.258656	0.124193	0.0925438
11.2667	0.706181	0.664403	0.69595	0.683198	0.573321	0.246998	0.129326	0.0933897
11.3667	0.725631	0.671445	0.669571	0.696503	0.586591	0.259016	0.125202	0.0943978
11.4667	0.756214	0.671827	0.704238	0.728117	0.614421	0.273054	0.137333	0.0958922
11.5667	0.738943	0.687416	0.701225	0.702346	0.593194	0.258534	0.128472	0.0978249
11.6667	0.724662	0.693751	0.687976	0.719274	0.596591	0.275706	0.137338	0.0950275
11.7667	0.765511	0.688579	0.71374	0.728771	0.599616	0.27198	0.135701	0.0989375
11.8667	0.752013	0.698927	0.699638	0.7233	0.596541	0.287112	0.132673	0.099908
11.9667	0.732778	0.691633	0.707614	0.718031	0.62304	0.277331	0.133291	0.100006
12.0667	0.762637	0.707892	0.69714	0.748207	0.654036	0.276596	0.14729	0.101487
12.1667	0.764656	0.696446	0.728264	0.736149	0.63464	0.263463	0.143595	0.101214
12.2667	0.76835	0.71091	0.730911	0.762571	0.63111	0.29582	0.153705	0.101625
12.3667	0.786336	0.755556	0.718058	0.74378	0.639575	0.283203	0.137344	0.102999
12.4667	0.787754	0.729538	0.713748	0.758195	0.652201	0.271679	0.154007	0.103424
12.5667	0.813211	0.733349	0.747205	0.782107	0.66159	0.296374	0.164844	0.102485
12.6667	0.788593	0.739829	0.749041	0.774264	0.639049	0.297239	0.150391	0.102908
12.7667	0.781918	0.728368	0.744265	0.76823	0.679737	0.301482	0.155839	0.107639
12.8667	0.791853	0.755378	0.7291	0.765005	0.664064	0.293321	0.15986	0.105374
12.9667	0.809099	0.755431	0.750886	0.785311	0.648699	0.295534	0.162236	0.107279
13.0667	0.783593	0.765794	0.767533	0.80325	0.684288	0.29177	0.170453	0.106705
13.1667	0.818243	0.747314	0.755669	0.782198	0.67996	0.326454	0.168549	0.104265
13.2667	0.822486	0.758756	0.782474	0.78638	0.682597	0.321651	0.162547	0.10891
13.3667	0.807592	0.746245	0.748134	0.786828	0.684785	0.30719	0.17084	0.108843
13.4667	0.828929	0.77683	0.775321	0.805939	0.706428	0.311042	0.170174	0.109178
13.5667	0.826591	0.763903	0.784523	0.806574	0.694777	0.314151	0.170828	0.108938
13.6667	0.841024	0.75554	0.782478	0.806797	0.670541	0.321976	0.157461	0.110592
13.7667	0.812388	0.775245	0.793827	0.823725	0.697399	0.321734	0.160979	0.111796
13.8667	0.837635	0.795643	0.771853	0.81044	0.672631	0.337716	0.162974	0.110545
13.9667	0.832215	0.761859	0.797558	0.824602	0.700713	0.321086	0.174904	0.109903
14.0667	0.82983	0.792215	0.793086	0.805567	0.701903	0.325068	0.173595	0.114897
14.1667	0.840822	0.796613	0.788926	0.833475	0.691203	0.327263	0.176286	0.112846
14.2667	0.85629	0.77538	0.787999	0.820458	0.695593	0.320319	0.172456	0.112989
14.3667	0.854284	0.806378	0.802291	0.831848	0.708485	0.33957	0.178346	0.115328
14.4667	0.867301	0.789275	0.782391	0.852253	0.69425	0.331448	0.181346	0.115864
14.5667	0.867536	0.811364	0.821175	0.850029	0.726317	0.347526	0.182733	0.115266
14.6667	0.886004	0.801782	0.790241	0.854166	0.74252	0.343905	0.172556	0.116571
14.7667	0.907654	0.835527	0.800847	0.820803	0.719865	0.331795	0.178731	0.123574
14.8667	0.867063	0.821042	0.829872	0.839382	0.733591	0.33698	0.172635	0.116661
14.9667	0.862042	0.809214	0.802577	0.825566	0.741065	0.337849	0.189445	0.118249
15.0667	0.888501	0.803917	0.837355	0.826088	0.745421	0.356378	0.193818	0.116426
15.1667	0.897981	0.817782	0.83823	0.87414	0.706067	0.344796	0.190216	0.115326
15.2667	0.862103	0.82314	0.8291	0.867032	0.742544	0.355191	0.184734	0.12191
15.3667	0.897521	0.818501	0.835912	0.879759	0.748244	0.344557	0.18955	0.117817
15.4667	0.896974	0.833737	0.828968	0.885432	0.71742	0.362213	0.193656	0.12201
15.5667	0.884526	0.8173	0.84459	0.859001	0.720161	0.355201	0.184331	0.122649
15.6667	0.883051	0.816582	0.8196	0.870326	0.743698	0.335637	0.199493	0.122245
15.7667	0.897528	0.819248	0.862436	0.879282	0.752362	0.351283	0.191582	0.12148
15.8667	0.881913	0.824473	0.831749	0.866959	0.73617	0.356566	0.199495	0.120104
15.9667	0.8996	0.827426	0.840652	0.894673	0.740758	0.349855	0.198517	0.119412
16.0667	0.902764	0.822877	0.825593	0.874745	0.75242	0.367713	0.197446	0.121498
16.1667	0.909777	0.830791	0.838144	0.872187	0.72749	0.354734	0.209813	0.120868
16.2667	0.88901	0.820023	0.831861	0.890141	0.742442	0.367249	0.194689	0.121246
16.3667	0.900135	0.823507	0.852181	0.906671	0.738556	0.373797	0.214906	0.121336
16.4667	0.916592	0.813158	0.862945	0.883471	0.761254	0.349759	0.199528	0.125373
16.5667	0.883969	0.848718	0.882863	0.855994	0.738147	0.383181	0.203442	0.119061
16.6667	0.938197	0.843601	0.850883	0.878466	0.740993	0.352951	0.212134	0.123828
16.7667	0.913247	0.869915	0.875089	0.887107	0.76312	0.366272	0.197706	0.124428
16.8667	0.912784	0.828403	0.862325	0.885098	0.743611	0.375043	0.215684	0.125928
16.9667	0.894861	0.887814	0.856014	0.886195	0.764503	0.362119	0.20654	0.131556
17.0667	0.912394	0.850648	0.861176	0.874451	0.74081	0.377773	0.202881	0.124911
17.1667	0.91273	0.825086	0.856132	0.892272	0.747086	0.372124	0.215831	0.127503
17.2667	0.935374	0.854236	0.87567	0.89492	0.764432	0.377051	0.212084	0.120539
17.3667	0.949232	0.843788	0.883833	0.899032	0.768371	0.386445	0.203338	0.121835
17.4667	0.909549	0.842343	0.871764	0.88692	0.742482	0.385531	0.217626	0.127541
17.5667	0.941373	0.845108	0.879771	0.884398	0.755651	0.381838	0.216095	0.137074
17.6667	0.933797	0.845254	0.841733	0.941663	0.762006	0.380185	0.220024	0.126503
17.7667	0.915776	0.84697	0.887665	0.908703	0.775541	0.381849	0.213884	0.132947
17.8667	0.933123	0.867195	0.85531	0.905155	0.746524	0.37849	0.223875	0.124789
17.9667	0.91792	0.883924	0.862812	0.894327	0.782495	0.376705	0.218264	0.123748
18.0667	0.904673	0.84624	0.888723	0.920741	0.769092	0.391042	0.230616	0.126055
18.1667	0.941149	0.869014	0.856561	0.919455	0.796302	0.380029	0.214112	0.127036
18.2667	0.935435	0.866313	0.861316	0.912318	0.776266	0.398004	0.209349	0.13055
18.3667	0.94627	0.871823	0.848266	0.909667	0.740923	0.391609	0.214624	0.133439
18.4667	0.907598	0.857964	0.891252	0.912082	0.78665	0.398304	0.22701	0.142835
18.5667	0.934151	0.861756	0.900953	0.869457	0.783484	0.352459	0.22216	0.127662
18.6667	0.955878	0.872919	0.885236	0.919353	0.771286	0.384316	0.22443	0.12056
18.7667	0.914643	0.870495	0.871772	0.925495	0.773021	0.361198	0.231361	0.128671
18.8667	0.928182	0.876444	0.858939	0.942717	0.780033	0.374767	0.226737	0.129345
18.9667	0.953679	0.869335	0.859079	0.903208	0.778491	0.399963	0.227421	0.127336
19.0667	0.955481	0.867985	0.891358	0.926836	0.755365	0.400458	0.238839	0.130266
19.1667	0.968796	0.864157	0.897602	0.906263	0.762455	0.39792	0.226018	0.136788
19.2667	0.936904	0.847104	0.879172	0.913096	0.781332	0.388198	0.225612	0.12027
19.3667	0.935288	0.870858	0.87877	0.93314	0.789148	0.38505	0.232437	0.129702
19.4667	0.951528	0.870708	0.8738	0.899169	0.793432	0.405485	0.223094	0.128716
19.5667	0.954236	0.867625	0.903628	0.928253	0.751526	0.407946	0.231226	0.123205
19.6667	0.934402	0.858726	0.88572	0.899547	0.764515	0.393772	0.231107	0.130418
19.7667	0.948546	0.852223	0.886845	0.918103	0.761624	0.381354	0.226078	0.139914
19.8667	0.946349	0.896507	0.873086	0.896362	0.795913	0.40948	0.222877	0.126926
19.9667	0.972861	0.867465	0.870249	0.928589	0.77733	0.400917	0.239319	0.125011
20.0667	0.941789	0.854039	0.888716	0.902622	0.777861	0.389792	0.233504	0.134635
20.1667	0.940701	0.875859	0.874632	0.910976	0.800377	0.395999	0.229859	0.126934
20.2667	0.954011	0.890538	0.874071	0.921704	0.780039	0.395485	0.241485	0.128923
20.3667	0.962543	0.916523	0.898018	0.924108	0.780236	0.395103	0.23557	0.131619
20.4667	0.945478	0.891737	0.91397	0.938191	0.784448	0.409713	0.243212	0.127123
20.5667	0.940383	0.885877	0.877365	0.893314	0.787808	0.414169	0.225579	0.129791
20.6667	0.939571	0.888772	0.899676	0.932432	0.785998	0.393921	0.231206	0.142216
20.7667	0.967487	0.87512	0.886864	0.920258	0.779843	0.409917	0.241663	0.141983
20.8667	0.957737	0.888107	0.881765	0.913721	0.763025	0.410153	0.244383	0.128574
20.9667	0.946412	0.88156	0.892019	0.952624	0.795308	0.399633	0.240551	0.134906
21.0667	0.951954	0.890024	0.871488	0.921872	0.795585	0.40412	0.247159	0.13395
21.1667	0.958592	0.900869	0.879889	0.945465	0.784314	0.409486	0.239028	0.133164
21.2667	0.951767	0.883347	0.898001	0.917552	0.795012	0.405796	0.237381	0.145245
21.3667	0.944784	0.898413	0.897729	0.922378	0.782503	0.402137	0.24111	0.129375
21.4667	0.964441	0.902048	0.889052	0.917189	0.78134	0.400533	0.247916	0.14119
21.5667	0.963131	0.895898	0.89904	0.933244	0.776605	0.39953	0.240304	0.139001
21.6667	0.970571	0.887792	0.901691	0.937465	0.763795	0.404497	0.247943	0.14062
21.7667	0.976816	0.874604	0.916066	0.915824	0.806074	0.417172	0.251611	0.148042
21.8667	0.980442	0.901436	0.899254	0.910482	0.779642	0.401237	0.256452	0.144419
21.9667	0.956859	0.881195	0.896524	0.939631	0.793373	0.422152	0.247189	0.138222
22.0667	0.962465	0.912078	0.895382	0.930623	0.767211	0.411005	0.25139	0.151139
22.1667	0.96744	0.88507	0.907681	0.916309	0.784653	0.422047	0.253409	0.142933
22.2667	0.935078	0.882371	0.890167	0.942395	0.771083	0.422202	0.253032	0.138852
22.3667	0.967996	0.91109	0.897929	0.923229	0.750151	0.421707	0.241096	0.135062
22.4667	0.9404	0.885507	0.892203	0.936746	0.780986	0.397251	0.233866	0.135594
22.5667	0.966977	0.870507	0.885791	0.912187	0.781972	0.420277	0.248458	0.14477
22.6667	0.961936	0.874143	0.891401	0.914522	0.779527	0.420385	0.248198	0.14108
22.7667	0.955381	0.887279	0.884711	0.930898	0.782703	0.424965	0.232493	0.137904
22.8667	0.961778	0.917583	0.905029	0.918235	0.766389	0.394158	0.236986	0.144552
22.9667	0.977818	0.884574	0.886956	0.923455	0.781678	0.406497	0.267592	0.145318
23.0667	0.973846	0.904599	0.884683	0.911101	0.776392	0.426327	0.248484	0.142445
23.1667	0.984087	0.897532	0.898985	0.932545	0.773239	0.40397	0.266778	0.138334
23.2667	0.965893	0.877639	0.888714	0.917176	0.78143	0.424449	0.265357	0.140713
23.3667	0.957656	0.894225	0.878884	0.948196	0.780133	0.419014	0.264696	0.135952
23.4667	0.963053	0.881141	0.913346	0.925378	0.7824	0.41108	0.261031	0.136096
23.5667	0.977265	0.913382	0.910976	0.954749	0.771526	0.428828	0.262864	0.139968
23.6667	0.938986	0.88906	0.902967	0.945822	0.781823	0.409271	0.261648	0.12957
23.7667	0.952295	0.900803	0.907151	0.916804	0.778038	0.408157	0.258044	0.133399
23.8667	0.964995	0.900288	0.887159	0.920429	0.770742	0.448545	0.2548	0.134818
23.9667	0.962991	0.900983	0.925031	0.91747	0.795124	0.432816	0.264295	0.145261
24.0667	0.940039	0.865057	0.912099	0.949493	0.780072	0.425632	0.258615	0.146925
24.1667	0.968467	0.899369	0.908857	0.930041	0.780536	0.42653	0.250034	0.13171
24.2667	0.967206	0.886977	0.902582	0.91899	0.752802	0.417927	0.262335	0.140159
24.3667	0.955852	0.876833	0.902658	0.918499	0.76616	0.424583	0.258604	0.147489
24.4667	0.982601	0.888784	0.923424	0.943793	0.770977	0.429655	0.254376	0.138397
24.5667	0.963218	0.877532	0.900511	0.904732	0.768179	0.419247	0.255196	0.147434
24.6667	0.976608	0.902203	0.886719	0.93693	0.771685	0.417295	0.249642	0.140788
24.7667	0.963474	0.883165	0.918641	0.918902	0.765235	0.414732	0.256738	0.144623
24.8667	0.973482	0.902417	0.92381	0.932142	0.794939	0.420081	0.25846	0.130497
24.9667	0.968391	0.88682	0.893909	0.919242	0.76482	0.428969	0.264628	0.150333
25.0667	0.975159	0.896247	0.890658	0.927749	0.807249	0.420679	0.263138	0.131809
25.1667	0.965815	0.90305	0.891875	0.94909	0.765277	0.431778	0.25167	0.150574
25.2667	0.948722	0.898659	0.913085	0.919017	0.771601	0.4281	0.294038	0.144712
25.3667	0.968737	0.8886	0.910355	0.920455	0.762731	0.439658	0.266431	0.143252
25.4667	0.976857	0.906677	0.868363	0.93271	0.783736	0.426763	0.264666	0.145211
25.5667	0.976647	0.859825	0.902449	0.925581	0.78673	0.419046	0.261661	0.148577
25.6667	0.96227	0.911411	0.903805	0.913619	0.776616	0.451869	0.256535	0.143919
25.7667	0.965813	0.902689	0.932633	0.935367	0.801969	0.420301	0.278404	0.133616
25.8667	0.967389	0.898163	0.892428	0.910576	0.76026	0.418115	0.259583	0.139451
25.9667	0.961256	0.882365	0.908604	0.931713	0.774926	0.425441	0.253051	0.146502
26.0667	0.972114	0.90194	0.914786	0.911101	0.765901	0.423319	0.261561	0.159685
26.1667	0.954457	0.920449	0.889067	0.906133	0.757449	0.438718	0.282478	0.147477
26.2667	0.962622	0.895629	0.887245	0.953606	0.761856	0.434822	0.277426	0.138703
26.3667	0.960978	0.907271	0.901118	0.933011	0.791599	0.42116	0.278763	0.145169
26.4667	0.970711	0.87549	0.900423	0.912837	0.771874	0.432501	0.293682	0.145717
26.5667	0.953282	0.889059	0.887886	0.902441	0.761026	0.427572	0.276048	0.139924
26.6667	0.955274	0.882487	0.92226	0.952336	0.760417	0.423483	0.271645	0.137898
26.7667	0.984936	0.878203	0.909936	0.917026	0.777321	0.424247	0.284033	0.152286
26.8667	0.941701	0.884635	0.91363	0.929296	0.758034	0.424281	0.273462	0.14845
26.9667	0.949634	0.876331	0.897404	0.930999	0.765466	0.426382	0.280651	0.146421
27.0667	0.953802	0.906004	0.887162	0.9276	0.768901	0.435523	0.284039	0.146631
27.1667	0.973381	0.875438	0.920116	0.933148	0.764245	0.43187	0.278278	0.145077
27.2667	0.970253	0.911036	0.890802	0.914417	0.775235	0.419086	0.28831	0.131972
27.3667	0.967257	0.91288	0.91389	0.901897	0.774306	0.430473	0.260966	0.14764
27.4667	0.967497	0.904672	0.94531	0.945941	0.758493	0.41066	0.269555	0.143879
27.5667	0.959793	0.893165	0.928704	0.908845	0.769313	0.425115	0.280147	0.138065
27.6667	0.957225	0.891528	0.909887	0.916696	0.771828	0.425558	0.282948	0.144697
27.7667	0.9715	0.889539	0.906077	0.946696	0.763772	0.438996	0.271827	0.148786
27.8667	0.944575	0.893141	0.919585	0.929179	0.775192	0.427209	0.279886	0.139176
27.9667	0.959496	0.88334	0.895251	0.953606	0.748464	0.431952	0.27579	0.154269
28.0667	1	0.885684	0.892019	0.915941	0.805886	0.416875	0.27393	0.151971
28.1667	0.958605	0.889868	0.912471	0.931811	0.754517	0.422338	0.280271	0.1568
28.2667	0.945329	0.905417	0.893614	0.918567	0.779188	0.453665	0.273754	0.148015
28.3667	0.958633	0.900675	0.895114	0.892458	0.746069	0.443968	0.289708	0.145591
28.4667	0.97134	0.889583	0.929148	0.942295	0.778485	0.428611	0.271977	0.147466
28.5667	0.970625	0.891411	0.881026	0.923119	0.751419	0.427422	0.275748	0.144429
28.6667	0.968655	0.902382	0.901461	0.942971	0.759586	0.432383	0.310252	0.146121
28.7667	0.937792	0.898748	0.919589	0.917544	0.77823	0.43665	0.281689	0.142513
28.8667	0.967598	0.91137	0.916735	0.91329	0.762012	0.421256	0.291749	0.13427
28.9667	0.963318	0.881599	0.894236	0.922606	0.755896	0.436056	0.280831	0.148734
29.0667	0.947083	0.904105	0.889784	0.931664	0.777344	0.449799	0.287419	0.137994
29.1667	0.960512	0.900983	0.939886	0.908127	0.772008	0.436136	0.277318	0.150264
29.2667	0.967478	0.902691	0.899707	0.923976	0.762108	0.422213	0.274222	0.138113
29.3667	0.985384	0.885829	0.917279	0.898472	0.785155	0.440483	0.27359	0.140853
29.4667	0.959624	0.872272	0.909955	0.929165	0.737945	0.417258	0.289138	0.144642
29.5667	0.960843	0.895176	0.897142	0.916473	0.776103	0.437516	0.291373	0.13893
29.6667	0.935608	0.861375	0.904069	0.917202	0.757864	0.433195	0.299269	0.15296
29.7667	0.96771	0.898071	0.900978	0.928462	0.760858	0.43673	0.288929	0.146464
29.8667	0.975943	0.893815	0.924302	0.870238	0.77709	0.436062	0.301248	0.153642
29.9667	0.978999	0.908038	0.883399	0.937902	0.762004	0.449022	0.275918	0.154436
30.0667	0.992858	0.887041	0.900363	0.903009	0.763452	0.43558	0.286273	0.146139
30.1667	0.956488	0.891519	0.906467	0.939487	0.765657	0.453208	0.295661	0.157507
30.2667	0.974318	0.904436	0.903658	0.916839	0.760281	0.424378	0.273604	0.153633
30.3667	0.969156	0.8943	0.928066	0.903847	0.763322	0.445812	0.301975	0.154273
30.4667	0.943254	0.913905	0.894685	0.895714	0.753298	0.443593	0.29387	0.155641
30.5667	0.955364	0.886018	0.917254	0.922969	0.761161	0.4337	0.287399	0.151382
30.6667	0.949898	0.876776	0.891529	0.91088	0.773877	0.440472	0.287027	0.155208
30.7667	0.954244	0.900266	0.89405	0.938587	0.745455	0.465482	0.292213	0.14276
30.8667	0.961273	0.900493	0.909229	0.904538	0.746884	0.449879	0.291745	0.140351
30.9667	0.964502	0.861162	0.88669	0.896423	0.737266	0.437024	0.296764	0.151406
31.0667	0.951432	0.903758	0.891704	0.921712	0.785922	0.456896	0.288931	0.148285
31.1667	0.949799	0.86296	0.907916	0.94918	0.768192	0.419936	0.287115	0.162923
31.2667	0.9556	0.898229	0.900389	0.896879	0.751437	0.450091	0.294646	0.151317
31.3667	0.954607	0.89893	0.9242	0.883335	0.736964	0.441069	0.307693	0.152393
31.4667	0.94294	0.898105	0.913064	0.911864	0.75551	0.443407	0.289567	0.154498
31.5667	0.952697	0.915441	0.891618	0.905983	0.76865	0.455898	0.306232	0.139241
31.6667	0.932728	0.873061	0.873699	0.906422	0.778948	0.427379	0.30461	0.159244
31.7667	0.966994	0.890592	0.872876	0.924252	0.754792	0.444036	0.289365	0.155137
31.8667	0.976496	0.883264	0.889194	0.912962	0.751218	0.440449	0.296927	0.161464
31.9667	0.981729	0.897911	0.915151	0.924193	0.762861	0.437476	0.286867	0.150649
32.0667	0.961338	0.88162	0.891076	0.910754	0.758404	0.453763	0.296257	0.149411
32.1667	0.958943	0.896052	0.924254	0.915104	0.741812	0.430061	0.302285	0.154533
32.2667	0.936584	0.874193	0.886052	0.907632	0.737588	0.42775	0.301695	0.15295
32.3667	0.955325	0.895787	0.888304	0.91284	0.775819	0.457594	0.300127	0.152076
32.4667	0.943658	0.904035	0.917263	0.921979	0.75009	0.437693	0.290456	0.135396
32.5667	0.923591	0.889672	0.911635	0.883394	0.736289	0.456175	0.282952	0.156412
32.6667	0.917537	0.898844	0.899001	0.902943	0.748523	0.425001	0.300933	0.15773
32.7667	0.945036	0.884464	0.914071	0.914859	0.746702	0.433635	0.289954	0.145755
32.8667	0.940251	0.8732	0.886799	0.906255	0.733953	0.473647	0.297942	0.143411
32.9667	0.97734	0.86735	0.881707	0.882655	0.771323	0.442583	0.305308	0.142398
33.0667	0.947042	0.888517	0.893468	0.902573	0.730603	0.448579	0.29742	0.160998
33.1667	0.96058	0.889879	0.925752	0.882231	0.738199	0.457948	0.294022	0.141869
33.2667	0.959042	0.916054	0.915315	0.903588	0.760907	0.446594	0.295558	0.149827
33.3667	0.93588	0.89788	0.89182	0.908986	0.733744	0.438512	0.297961	0.162411
33.4667	0.963859	0.8767	0.910014	0.923884	0.752435	0.457475	0.287473	0.155677
33.5667	0.965724	0.860755	0.887428	0.901677	0.773864	0.433049	0.313414	0.146751
33.6667	0.920542	0.888872	0.886291	0.920765	0.747773	0.428951	0.295167	0.147204
33.7667	0.978121	0.903362	0.885764	0.902652	0.751084	0.434191	0.310802	0.162783
33.8667	0.967404	0.916458	0.896178	0.927063	0.752063	0.416715	0.305064	0.152516
33.9667	0.949321	0.879845	0.905034	0.887857	0.730499	0.44691	0.304976	0.152569
34.0667	0.932154	0.881645	0.881855	0.920756	0.748439	0.454318	0.291665	0.148303
34.1667	0.994932	0.870363	0.88283	0.917597	0.728244	0.439927	0.30653	0.151507
34.2667	0.946902	0.895604	0.89633	0.891968	0.754269	0.437687	0.3074	0.151608
34.3667	0.917402	0.883974	0.885865	0.895026	0.738346	0.44427	0.299887	0.150158
34.4667	0.971763	0.871855	0.88794	0.893094	0.750277	0.443063	0.30751	0.141745
34.5667	0.95851	0.897338	0.904008	0.888067	0.731433	0.444482	0.314534	0.154939
34.6667	0.964898	0.869816	0.892817	0.894926	0.747564	0.44824	0.280863	0.143429
34.7667	0.93116	0.882781	0.902437	0.920683	0.756993	0.453101	0.317109	0.151658
34.8667	0.929723	0.881999	0.893278	0.88508	0.735429	0.455894	0.306725	0.157332
34.9667	0.947426	0.872805	0.885067	0.904492	0.73586	0.44289	0.307497	0.152722
35.0667	0.953178	0.867075	0.896235	0.879842	0.76105	0.439223	0.295839	0.150284
35.1667	0.948584	0.905606	0.894645	0.895337	0.737578	0.449922	0.304675	0.154878
35.2667	0.930193	0.871967	0.872528	0.897539	0.741302	0.432635	0.308582	0.160779
35.3667	0.957737	0.889773	0.8866	0.904686	0.761171	0.445116	0.300743	0.156213
35.4667	0.931439	0.88266	0.89292	0.894819	0.738151	0.441537	0.317726	0.152246
35.5667	0.963299	0.88654	0.895148	0.906385	0.7501	0.449214	0.299881	0.145912
35.6667	0.92888	0.864891	0.900213	0.888323	0.742631	0.444837	0.308645	0.151442
35.7667	0.94899	0.904224	0.908235	0.883158	0.723226	0.432677	0.289787	0.154715
35.8667	0.930365	0.875569	0.875261	0.896651	0.741042	0.447228	0.311607	0.152756
35.9667	0.951563	0.887503	0.867498	0.901796	0.727228	0.436385	0.311525	0.16041
36.0667	0.935086	0.888293	0.879744	0.89516	0.77279	0.446256	0.310042	0.146675
36.1667	0.940286	0.868565	0.889214	0.899485	0.727195	0.434556	0.303245	0.147294
36.2667	0.918485	0.88008	0.894158	0.895492	0.710062	0.434914	0.310475	0.158494
36.3667	0.932557	0.86891	0.922489	0.871072	0.717977	0.429679	0.322052	0.147117
36.4667	0.936127	0.888545	0.873666	0.902882	0.719454	0.451697	0.313521	0.14809
36.5667	0.927244	0.874506	0.877403	0.892097	0.747208	0.431191	0.31259	0.16733

## Sheet: Acp1 primary data
val (nM)	0	1	3.16	10	31.6	100	316	1000
Time
0	2.37792e-06	1.72e-05	2.38e-06	1.78e-06	1.96e-05	2.91e-05	1.49e-05	5.29e-05
0.116667	4.16135e-06	8.32e-06	1.19e-06	2.2e-05	3.09e-05	3.21e-05	3.33e-05	4.7e-05
0.233333	2.43736e-05	1.07e-05	1.19e-06	2.68e-05	2.62e-05	2.73e-05	2.32e-05	4.22e-05
0.35	5.94479e-07	4.76e-06	1.19e-06	2.97e-06	2.08e-05	1.19e-05	4.64e-05	2.5e-05
0.466667	1.78344e-06	1.19e-06	2.91e-05	3.75e-05	3.21e-05	1.78e-05	4.58e-05	1.49e-05
0.983333	0.000636093	0.000568	0.000637	0.000646	0.000662	0.000455	0.00048	0.000629
1.1	0.000661061	0.000611	0.000594	0.000591	0.000498	0.000511	0.000479	0.000575
1.21667	0.000704458	0.000553	0.00056	0.000505	0.000468	0.000571	0.000587	0.000525
1.33333	0.000682462	0.000707	0.000489	0.000559	0.00049	0.000638	0.000611	0.00058
1.45	0.000684245	0.000567	0.000511	0.000614	0.000546	0.000564	0.000442	0.000498
1.56667	0.000670572	0.000675	0.000567	0.000589	0.000485	0.000559	0.000599	0.000515
1.68333	0.000464883	0.000589	0.000571	0.000657	0.000603	0.000457	0.000547	0.000506
1.8	0.000717536	0.000549	0.000594	0.000509	0.000652	0.000538	0.000482	0.000489
1.91667	0.000703863	0.00056	0.000696	0.000608	0.000729	0.000599	0.000593	0.0006
2.03333	0.000559405	0.000632	0.000631	0.000526	0.000517	0.000713	0.000693	0.000567
2.15	0.000614097	0.000562	0.000677	0.000508	0.000544	0.000522	0.000438	0.000537
2.26667	0.000689596	0.000616	0.000512	0.000587	0.000586	0.000632	0.000517	0.000585
2.38333	0.000633715	0.000547	0.000611	0.000524	0.00036	0.000526	0.000463	0.000578
2.5	0.000699702	0.00066	0.00057	0.000546	0.000662	0.000526	0.000519	0.000562
2.61667	0.000710402	0.000632	0.000669	0.000573	0.000682	0.000598	0.000478	0.000634
2.73333	0.000565944	0.000548	0.000669	0.000689	0.000517	0.000568	0.000641	0.000554
2.85	0.000729426	0.000609	0.000554	0.00066	0.000695	0.000782	0.000502	0.000473
2.96667	0.000689596	0.000652	0.000628	0.000642	0.00069	0.000542	0.000533	0.00056
3.08333	0.000735371	0.00063	0.000543	0.000728	0.000706	0.000663	0.000633	0.00059
3.2	0.000689001	0.000569	0.000578	0.000608	0.000641	0.000592	0.000613	0.000594
3.31667	0.000703863	0.00053	0.00064	0.000672	0.000445	0.000653	0.000627	0.000477
3.43333	0.000694352	0.00062	0.000605	0.000703	0.00063	0.000556	0.000505	0.000623
3.55	0.000725859	0.000626	0.000555	0.000627	0.000732	0.000697	0.000508	0.000647
3.66667	0.000773417	0.000773	0.000832	0.000646	0.00059	0.00057	0.00058	0.000578
3.78333	0.00066225	0.00072	0.000732	0.000566	0.000746	0.000546	0.000594	0.000575
3.9	0.000710402	0.000638	0.00063	0.000461	0.000618	0.000672	0.000653	0.000526
4.01667	0.000800169	0.000731	0.00055	0.000723	0.00063	0.000647	0.000694	0.000585
4.13333	0.000625986	0.000602	0.000554	0.0006	0.00067	0.000569	0.000588	0.000705
4.25	0.0006676	0.000729	0.000668	0.000744	0.000656	0.000748	0.000556	0.000679
4.36667	0.000681273	0.000581	0.000581	0.000687	0.000762	0.000602	0.000627	0.000537
4.48333	0.000653333	0.000707	0.000675	0.000548	0.000671	0.000794	0.000614	0.000736
4.6	0.000596857	0.000735	0.000622	0.000718	0.000781	0.00066	0.000612	0.000704
4.71667	0.000778173	0.000714	0.000679	0.000588	0.000603	0.000743	0.000789	0.000556
4.83333	0.000752016	0.000726	0.000791	0.000686	0.000797	0.000647	0.000605	0.000684
4.95	0.000790657	0.000556	0.000551	0.000728	0.000679	0.000577	0.000708	0.000666
5.06667	0.00073656	0.00066	0.000715	0.000616	0.000569	0.00085	0.000625	0.00053
5.18333	0.000753799	0.000679	0.000649	0.000622	0.000684	0.000677	0.000624	0.000684
5.3	0.000749044	0.000974	0.000688	0.000739	0.000498	0.000648	0.000658	0.0007
5.41667	0.00072467	0.000698	0.00071	0.000709	0.000601	0.000767	0.000769	0.000663
5.53333	0.000710402	0.000655	0.000507	0.000653	0.000638	0.000524	0.000722	0.000644
5.65	0.0006676	0.000578	0.000715	0.000808	0.000653	0.000777	0.000768	0.000631
5.76667	0.000902419	0.000599	0.000611	0.000721	0.00068	0.000682	0.000624	0.000663
5.88333	0.000661061	0.000832	0.000701	0.000631	0.000613	0.000653	0.00076	0.000779
6.43333	0.0318718	0.01985	0.016943	0.022528	0.029301	0.031319	0.031854	0.03218
6.55	0.03517	0.022708	0.020294	0.037008	0.049893	0.055935	0.057365	0.057272
6.66667	0.0383148	0.02565	0.024314	0.053293	0.079754	0.090405	0.088486	0.095733
6.78333	0.0406933	0.02881	0.027645	0.079082	0.112058	0.127072	0.131949	0.131829
6.9	0.0434505	0.032076	0.032379	0.106078	0.141845	0.167207	0.165561	0.183836
7.01667	0.0463307	0.03509	0.038771	0.123474	0.193556	0.212995	0.213688	0.221127
7.13333	0.0490808	0.03717	0.041465	0.151758	0.224385	0.25258	0.25375	0.281438
7.25	0.0516579	0.040402	0.048931	0.171161	0.263214	0.28644	0.285076	0.325184
7.36667	0.052486	0.041959	0.05308	0.210121	0.303633	0.323037	0.339671	0.355374
7.48333	0.0568881	0.044343	0.058851	0.232246	0.32985	0.356715	0.39085	0.402006
7.6	0.0591982	0.047064	0.065375	0.246763	0.364326	0.407372	0.42005	0.426635
7.71667	0.0606339	0.049941	0.07261	0.268826	0.394156	0.441093	0.438578	0.476978
7.83333	0.0630225	0.051299	0.074645	0.306982	0.429214	0.468791	0.487567	0.498614
7.95	0.06211	0.053702	0.082307	0.322312	0.46627	0.491395	0.507577	0.523671
8.06667	0.0673485	0.055107	0.08784	0.335433	0.47562	0.527578	0.529629	0.550623
8.18333	0.0710694	0.05789	0.09586	0.368108	0.492201	0.545639	0.546755	0.571871
8.3	0.0701051	0.06103	0.109749	0.37129	0.519853	0.555535	0.582516	0.601763
8.41667	0.0661025	0.064239	0.109406	0.400773	0.545153	0.558951	0.601071	0.621568
8.53333	0.0715681	0.059516	0.121903	0.415852	0.551058	0.592985	0.609013	0.645252
8.65	0.0771027	0.067935	0.111449	0.434628	0.568375	0.608677	0.614979	0.67106
8.76667	0.0753811	0.069863	0.133475	0.442492	0.57829	0.628138	0.644139	0.681796
8.88333	0.0772603	0.075564	0.134052	0.456011	0.61865	0.637086	0.635516	0.70813
9	0.0774862	0.072132	0.146117	0.471958	0.626462	0.671649	0.679622	0.712078
9.11667	0.0767793	0.071778	0.146568	0.48064	0.639622	0.668167	0.684765	0.70454
9.23333	0.0815839	0.077222	0.148251	0.489998	0.639237	0.689279	0.696789	0.728164
9.35	0.0804461	0.074073	0.159041	0.498683	0.654431	0.692617	0.697502	0.762001
9.46667	0.0885043	0.079336	0.160477	0.514324	0.672397	0.721835	0.730631	0.783094
9.58333	0.082635	0.076509	0.165196	0.524641	0.679267	0.715425	0.755658	0.760661
9.7	0.0883759	0.080532	0.17684	0.531568	0.69856	0.724741	0.729592	0.796444
9.81667	0.0842341	0.075148	0.176652	0.537514	0.695215	0.738181	0.746673	0.792029
9.93333	0.0854213	0.085913	0.188644	0.543326	0.71729	0.744304	0.764211	0.80423
10.05	0.0821606	0.079821	0.19017	0.562332	0.714218	0.750692	0.770967	0.819248
10.1667	0.0907145	0.083065	0.200565	0.572327	0.703535	0.75549	0.773993	0.812627
10.2833	0.0875311	0.088714	0.198623	0.587387	0.743927	0.770419	0.794956	0.821986
10.4	0.0974862	0.091285	0.206625	0.576994	0.734489	0.78121	0.815591	0.834124
10.5167	0.0926989	0.086468	0.216851	0.579287	0.747431	0.79772	0.813957	0.84037
10.6333	0.0921651	0.091447	0.217276	0.587664	0.758485	0.779186	0.815352	0.847255
10.75	0.089799	0.088642	0.218666	0.597429	0.762766	0.79141	0.839327	0.87224
10.8667	0.0929438	0.092424	0.224743	0.59422	0.764454	0.807316	0.841035	0.859597
10.9833	0.103044	0.089189	0.225167	0.605243	0.754726	0.839838	0.865078	0.877668
11.1	0.0945317	0.097004	0.250599	0.61258	0.775407	0.830693	0.842972	0.891968
11.2167	0.0995527	0.096565	0.245087	0.633582	0.782572	0.813597	0.848284	0.881159
11.3333	0.0986746	0.100749	0.252295	0.634125	0.788351	0.834233	0.857789	0.878011
11.45	0.092558	0.094833	0.235582	0.628342	0.813074	0.859104	0.842838	0.917551
11.5667	0.102425	0.098776	0.256821	0.63559	0.812389	0.856072	0.872462	0.909746
11.6833	0.097774	0.099587	0.261791	0.634376	0.83634	0.853096	0.886987	0.921418
11.8	0.0984784	0.100151	0.260427	0.645604	0.805073	0.873011	0.880173	0.9083
11.9167	0.10364	0.104099	0.268853	0.646828	0.819454	0.873025	0.870594	0.90288
12.0333	0.110376	0.101589	0.27752	0.647691	0.814735	0.875834	0.866831	0.914994
12.15	0.104813	0.109883	0.272466	0.654914	0.817221	0.86793	0.91722	0.941076
12.2667	0.102255	0.106625	0.281069	0.652943	0.828967	0.873337	0.895718	0.945241
12.3833	0.1048	0.101726	0.28559	0.66062	0.84543	0.87423	0.910337	0.923849
12.5	0.103079	0.106809	0.2921	0.647016	0.832834	0.888057	0.882762	0.940854
12.6167	0.105075	0.106875	0.286641	0.681604	0.840869	0.904874	0.909092	0.932958
12.7333	0.117829	0.108977	0.300223	0.669736	0.835039	0.895054	0.918642	0.950066
12.85	0.106182	0.112936	0.289288	0.681771	0.841317	0.900182	0.89882	0.924762
12.9667	0.105175	0.109875	0.306135	0.681231	0.864678	0.899795	0.91069	0.944019
13.0833	0.100984	0.112005	0.29978	0.683095	0.857418	0.878967	0.912158	0.938782
13.2	0.106727	0.11662	0.299154	0.703525	0.870086	0.88984	0.918865	0.942434
13.3167	0.111422	0.116674	0.319532	0.681181	0.862573	0.896313	0.913067	0.937299
13.4333	0.106529	0.115689	0.312297	0.691965	0.87803	0.918583	0.915991	0.976365
13.55	0.111393	0.114409	0.325006	0.6995	0.885172	0.905684	0.920346	0.967893
13.6667	0.109583	0.120837	0.312485	0.698542	0.868966	0.931495	0.944708	0.970107
13.7833	0.109839	0.11881	0.315134	0.691495	0.841851	0.91405	0.943105	0.959418
13.9	0.104829	0.117062	0.312472	0.696943	0.867016	0.911767	0.920331	0.956341
14.0167	0.107034	0.114687	0.32334	0.700985	0.866754	0.904278	0.934686	0.929664
14.1333	0.110307	0.123353	0.328956	0.711006	0.885741	0.912307	0.937533	0.983714
14.25	0.11795	0.121529	0.338756	0.71558	0.881894	0.906555	0.966524	0.936749
14.3667	0.113403	0.116444	0.331164	0.706524	0.888133	0.905169	0.916536	0.959376
14.4833	0.107791	0.1175	0.344414	0.725042	0.86062	0.924596	0.907668	0.988849
14.6	0.114274	0.114795	0.341398	0.695261	0.880555	0.951576	0.9063	0.973577
14.7167	0.108486	0.126904	0.336368	0.710361	0.886666	0.928214	0.94993	0.96996
14.8333	0.117014	0.126305	0.342525	0.714957	0.86835	0.901132	0.944106	0.9774
14.95	0.121676	0.120737	0.339882	0.708685	0.890335	0.908579	0.950571	0.967049
15.0667	0.112868	0.125568	0.350397	0.718226	0.882455	0.93416	0.937719	1
15.1833	0.117542	0.120828	0.350203	0.712642	0.865953	0.924256	0.924885	0.96747
15.3	0.117006	0.120326	0.356634	0.717467	0.884304	0.930328	0.94627	0.985474
15.4167	0.117128	0.128255	0.344561	0.707979	0.885368	0.92532	0.924777	0.955101
15.5333	0.114686	0.133629	0.352759	0.736343	0.907537	0.93569	0.939089	0.98556
15.65	0.114147	0.126899	0.359471	0.732349	0.902577	0.940237	0.93241	0.958634
15.7667	0.124976	0.13292	0.350634	0.713901	0.894212	0.911474	0.952709	0.984328
15.8833	0.121901	0.129532	0.367792	0.722597	0.898206	0.915932	0.936076	0.965054
16	0.116269	0.126631	0.364548	0.735923	0.893277	0.910042	0.948871	0.997668
16.1167	0.120886	0.124719	0.363409	0.720779	0.874935	0.920956	0.933384	0.960569
16.2333	0.11748	0.127099	0.376034	0.729339	0.893929	0.922615	0.953268	0.980211
16.35	0.11853	0.131171	0.376478	0.720455	0.885985	0.933282	0.930042	0.970904
16.4667	0.123405	0.140424	0.373653	0.730401	0.877865	0.938276	0.94056	0.967721
16.5833	0.116935	0.133134	0.375867	0.740759	0.888795	0.926429	0.947596	0.980585
16.7	0.124646	0.134617	0.375772	0.734585	0.888372	0.916464	0.927371	0.97964
16.8167	0.122739	0.142668	0.381261	0.744558	0.886941	0.924208	0.951095	0.981693
16.9333	0.121534	0.13688	0.380942	0.71949	0.902149	0.928355	0.940507	0.977802
17.05	0.121497	0.134706	0.382585	0.728066	0.867652	0.946351	0.956979	0.966036
17.1667	0.120905	0.133151	0.384903	0.740577	0.897876	0.923678	0.938528	0.972932
17.2833	0.129274	0.138778	0.386121	0.742809	0.896983	0.940059	0.943911	0.969688
17.4	0.121038	0.140771	0.381521	0.723503	0.878788	0.934343	0.912433	0.972856
17.5167	0.120868	0.131436	0.388356	0.743702	0.905741	0.918648	0.929096	0.989027
17.6333	0.122029	0.142671	0.38975	0.736388	0.87934	0.904646	0.954025	0.964262
17.75	0.12157	0.140322	0.384966	0.727526	0.896921	0.930815	0.93813	0.95813
17.8667	0.121122	0.136611	0.387544	0.743461	0.880717	0.913465	0.942494	0.974439
17.9833	0.123159	0.13241	0.400608	0.758539	0.899839	0.930432	0.93297	0.963226
18.1	0.117993	0.147341	0.391139	0.761326	0.882864	0.917183	0.927188	0.983325
18.2167	0.126091	0.146773	0.407918	0.720578	0.880605	0.92108	0.934318	0.958239
18.3333	0.124597	0.142841	0.399967	0.718562	0.856303	0.912426	0.928721	0.963413
18.45	0.120187	0.145148	0.404423	0.749969	0.865829	0.921617	0.943045	0.962891
18.5667	0.124537	0.146186	0.401475	0.749305	0.874373	0.910611	0.926481	0.9584
18.6833	0.128762	0.139451	0.408559	0.732815	0.878991	0.921232	0.924459	0.950242
18.8	0.120689	0.148161	0.407259	0.75352	0.897634	0.934598	0.934754	0.977903
18.9167	0.125336	0.142778	0.398706	0.718059	0.870795	0.927128	0.969004	0.97495
19.0333	0.131766	0.145005	0.395204	0.732125	0.900917	0.913812	0.926655	0.968205
19.15	0.127761	0.144181	0.417585	0.728845	0.875083	0.926012	0.95448	0.968767
19.2667	0.124474	0.144779	0.404598	0.742076	0.892017	0.934072	0.953835	0.965515
19.3833	0.124881	0.147588	0.402656	0.743538	0.89146	0.920859	0.925264	0.934257
19.5	0.126238	0.151447	0.414499	0.708795	0.89213	0.89929	0.930114	0.966692
19.6167	0.129863	0.143717	0.41066	0.74482	0.866275	0.905844	0.920582	0.959749
19.7333	0.128873	0.149933	0.41958	0.73773	0.879615	0.92882	0.938086	0.955793
19.85	0.128765	0.151786	0.414353	0.73096	0.901713	0.90835	0.913298	0.964435
19.9667	0.121572	0.154562	0.402373	0.727701	0.885467	0.912527	0.914924	0.955174
20.0833	0.124677	0.146385	0.414732	0.74308	0.862147	0.913244	0.928698	0.943044
20.2	0.135006	0.15439	0.432216	0.728756	0.880297	0.912115	0.941937	0.936621
20.3167	0.13036	0.157729	0.411485	0.720567	0.856644	0.91747	0.941789	0.955434
20.4333	0.131689	0.147139	0.418479	0.724505	0.884128	0.912524	0.909812	0.948144
20.55	0.132304	0.151603	0.420546	0.762205	0.853698	0.908632	0.918256	0.948411
20.6667	0.13152	0.150108	0.421187	0.736465	0.867764	0.891289	0.933425	0.946609
20.7833	0.129474	0.151792	0.427384	0.71273	0.87411	0.925814	0.915245	0.970052
20.9	0.133414	0.157392	0.432819	0.737064	0.883524	0.903252	0.936298	0.953597
21.0167	0.130497	0.14999	0.420285	0.74004	0.870446	0.900831	0.912572	0.953407
21.1333	0.12732	0.154355	0.429191	0.74095	0.875992	0.88209	0.927603	0.932668
21.25	0.127337	0.153438	0.430595	0.739178	0.869391	0.895554	0.88968	0.942305
21.3667	0.133031	0.158274	0.423147	0.721508	0.860403	0.930703	0.917075	0.942432
21.4833	0.129276	0.15607	0.424377	0.748746	0.865236	0.900158	0.912421	0.929938
21.6	0.129406	0.156124	0.439369	0.735306	0.869319	0.922319	0.912286	0.919984
21.7167	0.130656	0.150324	0.427791	0.727701	0.86616	0.920159	0.913482	0.916876
21.8333	0.123908	0.158338	0.42723	0.73465	0.858736	0.910471	0.931269	0.928571
21.95	0.131829	0.164472	0.435852	0.737589	0.872516	0.892878	0.909236	0.952921
22.0667	0.133788	0.15446	0.431581	0.729786	0.869021	0.911522	0.917828	0.915851
22.1833	0.126854	0.154079	0.428924	0.720282	0.88062	0.889954	0.908627	0.922099
22.3	0.125535	0.160476	0.428388	0.724695	0.888212	0.892147	0.911866	0.939083
22.4167	0.13063	0.16396	0.426006	0.730152	0.861683	0.879905	0.897132	0.93289
22.5333	0.137373	0.157347	0.434282	0.733682	0.871899	0.892567	0.888514	0.930239
22.65	0.133686	0.153559	0.429879	0.734792	0.862916	0.893991	0.893529	0.921624
22.7667	0.129995	0.159207	0.427923	0.712719	0.854818	0.892987	0.900185	0.897476
22.8833	0.133899	0.159174	0.430026	0.731898	0.858351	0.894733	0.909746	0.925557
23	0.132093	0.159081	0.438427	0.735109	0.841577	0.87964	0.896817	0.9346
23.1167	0.122209	0.162112	0.434037	0.7084	0.872884	0.888869	0.897707	0.909267
23.2333	0.13474	0.155883	0.437335	0.721	0.866355	0.886161	0.917344	0.903556
23.35	0.133185	0.155111	0.443937	0.708991	0.857983	0.915696	0.874612	0.921042
23.4667	0.131336	0.161846	0.432917	0.722138	0.863765	0.899151	0.885804	0.930139
23.5833	0.127428	0.16131	0.43641	0.72817	0.851069	0.890253	0.887743	0.908373
23.7	0.133962	0.163817	0.439344	0.708761	0.863914	0.874422	0.890533	0.909517
23.8167	0.130958	0.168799	0.437599	0.720185	0.862904	0.866811	0.89758	0.921583
23.9333	0.128948	0.167578	0.440273	0.725089	0.845173	0.874563	0.878004	0.914048
24.05	0.130045	0.168337	0.448538	0.716515	0.842853	0.8693	0.87863	0.901281
24.1667	0.138825	0.169346	0.445648	0.711294	0.82261	0.875932	0.875096	0.922888
24.2833	0.125056	0.160546	0.451198	0.699897	0.849408	0.869861	0.879916	0.901146
24.4	0.135325	0.163884	0.445942	0.71547	0.847835	0.871115	0.885544	0.884274
24.5167	0.134726	0.167972	0.441488	0.735897	0.838374	0.883397	0.889867	0.903773
24.6333	0.127536	0.162386	0.449826	0.741	0.833081	0.865968	0.867391	0.900288
24.75	0.133063	0.170641	0.437839	0.699153	0.83455	0.8779	0.8796	0.880859
24.8667	0.135309	0.172741	0.450979	0.69397	0.848807	0.863856	0.87369	0.892246
24.9833	0.133911	0.176233	0.445577	0.717351	0.842866	0.875818	0.868318	0.896514
25.1	0.122813	0.170796	0.433886	0.734378	0.836912	0.860819	0.871543	0.919025
25.2167	0.133933	0.171477	0.450663	0.73684	0.842138	0.843818	0.868661	0.900608
25.3333	0.131439	0.170223	0.451006	0.705631	0.850892	0.87816	0.874975	0.906538
25.45	0.131244	0.169875	0.44911	0.716494	0.825821	0.869668	0.86195	0.882199
25.5667	0.134265	0.163408	0.439148	0.719298	0.835397	0.869222	0.867546	0.874795
25.6833	0.131162	0.171793	0.446846	0.722356	0.839519	0.862335	0.854428	0.904653
25.8	0.126449	0.16392	0.449923	0.714453	0.828004	0.869844	0.882965	0.885422
25.9167	0.135418	0.172407	0.436047	0.70965	0.831859	0.866235	0.842237	0.879508
26.0333	0.130842	0.178749	0.451648	0.711693	0.823047	0.840727	0.860229	0.870409
26.15	0.133445	0.17416	0.442757	0.683548	0.804655	0.859767	0.853942	0.890611
26.2667	0.138712	0.165943	0.446709	0.706034	0.816982	0.837483	0.872468	0.901799
26.3833	0.133647	0.174365	0.466048	0.703517	0.832306	0.845896	0.850478	0.878903
26.5	0.128792	0.179246	0.427278	0.695546	0.821846	0.854653	0.879028	0.871807
26.6167	0.13323	0.171969	0.448556	0.680076	0.816988	0.853405	0.842774	0.877454
26.7333	0.134884	0.175524	0.439504	0.69625	0.840576	0.844395	0.849511	0.873537
26.85	0.12952	0.177821	0.451644	0.687327	0.816134	0.85161	0.859046	0.87086
26.9667	0.136514	0.17098	0.45776	0.708025	0.827027	0.843198	0.853019	0.876737
27.0833	0.13064	0.172658	0.455822	0.696637	0.823195	0.852573	0.855641	0.880555
27.2	0.132596	0.16981	0.441609	0.689038	0.814144	0.842847	0.847603	0.878046
27.3167	0.128579	0.176211	0.449544	0.69989	0.828447	0.850881	0.854548	0.873167
27.4333	0.142651	0.175872	0.452369	0.729567	0.825859	0.831207	0.839373	0.87619
27.55	0.131901	0.174328	0.448529	0.683834	0.827853	0.831959	0.844351	0.880139
27.6667	0.145212	0.180836	0.456785	0.700622	0.794226	0.845532	0.839964	0.870364
27.7833	0.137002	0.175657	0.442187	0.69714	0.814977	0.824617	0.843204	0.866168
27.9	0.132188	0.174757	0.460061	0.699381	0.804654	0.841778	0.836301	0.864058
28.0167	0.131283	0.186421	0.450707	0.681205	0.807634	0.840337	0.839722	0.853354
28.1333	0.13204	0.173868	0.450616	0.676902	0.797017	0.834215	0.834905	0.848357
28.25	0.13024	0.17813	0.44061	0.691773	0.828146	0.833271	0.856997	0.863891
28.3667	0.14208	0.184188	0.455401	0.698268	0.802912	0.834659	0.844494	0.846056
28.4833	0.143203	0.173951	0.451613	0.699564	0.815963	0.837625	0.845717	0.88169
28.6	0.132502	0.182994	0.45731	0.694349	0.802125	0.823755	0.84627	0.840568
28.7167	0.134625	0.184753	0.456365	0.711822	0.793547	0.833226	0.829908	0.846098
28.8333	0.13897	0.175217	0.446044	0.688428	0.791206	0.828155	0.824906	0.852791
28.95	0.133302	0.187501	0.441256	0.692439	0.798212	0.802872	0.814853	0.880471
29.0667	0.138512	0.179879	0.465211	0.684251	0.787882	0.820526	0.802851	0.853931
29.1833	0.146081	0.176917	0.455205	0.683249	0.80553	0.81819	0.832084	0.865976
29.3	0.134612	0.179325	0.453926	0.698877	0.806027	0.820805	0.836078	0.853736
29.4167	0.142942	0.17949	0.459828	0.681396	0.800469	0.81623	0.827924	0.849374
29.5333	0.136054	0.181299	0.458268	0.68451	0.800219	0.792378	0.8166	0.855855
29.65	0.136651	0.177501	0.45082	0.700935	0.814426	0.825491	0.833035	0.840617
29.7667	0.139074	0.185197	0.444758	0.686987	0.77551	0.803543	0.839042	0.827254
29.8833	0.133739	0.187836	0.454063	0.684316	0.780562	0.815766	0.835813	0.826194
30	0.135067	0.180218	0.461075	0.674495	0.782735	0.810402	0.819127	0.833517
30.1167	0.137022	0.184481	0.449029	0.673421	0.798609	0.815354	0.825707	0.83879
30.2333	0.144361	0.189891	0.456454	0.675436	0.790605	0.814388	0.843561	0.846694
30.35	0.146062	0.18122	0.463361	0.665572	0.813016	0.803196	0.811901	0.837255
30.4667	0.135209	0.189485	0.461724	0.68824	0.772407	0.829936	0.810539	0.820703
30.5833	0.135407	0.179549	0.467255	0.673544	0.787943	0.808336	0.82395	0.824962
30.7	0.131884	0.176035	0.454318	0.673635	0.774944	0.815552	0.815776	0.84525
30.8167	0.14015	0.185906	0.452968	0.690215	0.791079	0.802002	0.832421	0.828578
30.9333	0.13517	0.190461	0.465499	0.681255	0.806573	0.815263	0.800499	0.832189
31.05	0.136107	0.184237	0.452391	0.668783	0.780002	0.792826	0.811821	0.826668
31.1667	0.138192	0.192835	0.450216	0.688665	0.785308	0.801843	0.816563	0.822126
31.2833	0.137174	0.188717	0.458227	0.65542	0.803519	0.78835	0.800251	0.805873
31.4	0.140915	0.187619	0.456725	0.673749	0.770149	0.802613	0.803541	0.818136
31.5167	0.13926	0.189405	0.43868	0.689773	0.776972	0.787558	0.783164	0.852443
31.6333	0.13584	0.192058	0.454677	0.679509	0.765997	0.807331	0.796053	0.820893
31.75	0.133593	0.192514	0.464235	0.671329	0.783429	0.784848	0.813355	0.831101
31.8667	0.133945	0.193671	0.467832	0.680728	0.787673	0.793288	0.807438	0.829327
31.9833	0.135214	0.193795	0.46928	0.667478	0.757586	0.804859	0.801487	0.804981
32.1	0.132283	0.196013	0.453441	0.67333	0.76618	0.795236	0.791897	0.817156
32.2167	0.132209	0.193348	0.453478	0.675252	0.769691	0.794409	0.810349	0.811779
32.3333	0.13642	0.185046	0.44736	0.654803	0.756028	0.797517	0.804061	0.803889
32.45	0.132647	0.195511	0.446168	0.66511	0.768924	0.779956	0.818475	0.816244
32.5667	0.140714	0.199371	0.462019	0.667973	0.773134	0.787424	0.791895	0.793128
32.6833	0.134654	0.197554	0.457679	0.654507	0.771233	0.792083	0.814314	0.823347
32.8	0.139244	0.196713	0.461615	0.673652	0.770272	0.772797	0.775902	0.790852
32.9167	0.129321	0.19091	0.447995	0.668385	0.757192	0.786962	0.79398	0.815547
33.0333	0.13995	0.195704	0.457612	0.657884	0.782337	0.765018	0.804602	0.80917
33.15	0.135217	0.189181	0.462137	0.646842	0.754965	0.81364	0.78049	0.80827
33.2667	0.135363	0.198032	0.461172	0.640716	0.767414	0.781906	0.795883	0.788836
33.3833	0.146039	0.197684	0.460136	0.656086	0.760245	0.772709	0.78992	0.792861
33.5	0.133958	0.191455	0.451197	0.669735	0.741272	0.792113	0.764667	0.81003
33.6167	0.132502	0.197418	0.454564	0.674357	0.759462	0.785354	0.788661	0.800492
33.7333	0.131295	0.192352	0.450697	0.658321	0.762195	0.785602	0.769885	0.784021
33.85	0.131926	0.198284	0.458486	0.652646	0.742772	0.787122	0.787006	0.800878
33.9667	0.137082	0.192283	0.455697	0.648909	0.759959	0.775304	0.785812	0.782404
34.0833	0.132067	0.203046	0.459657	0.657742	0.758071	0.770872	0.789302	0.774488
34.2	0.14112	0.192406	0.441548	0.673619	0.755421	0.768684	0.785291	0.803544
34.3167	0.143244	0.203487	0.460766	0.666968	0.743479	0.77964	0.762044	0.808155
34.4333	0.139307	0.199386	0.453979	0.659436	0.736404	0.761654	0.775574	0.807454
34.55	0.132712	0.196806	0.46499	0.663002	0.745319	0.76896	0.761828	0.768113
34.6667	0.131636	0.193394	0.465899	0.641804	0.754571	0.769875	0.787999	0.783211
34.7833	0.138041	0.194172	0.454839	0.657286	0.756113	0.746849	0.785463	0.783384
34.9	0.13682	0.204559	0.457931	0.644534	0.746231	0.772943	0.767148	0.799387
35.0167	0.137283	0.200177	0.447902	0.669416	0.744068	0.761237	0.783296	0.793964
35.1333	0.142208	0.201343	0.452792	0.647651	0.742972	0.749245	0.777227	0.787393
35.25	0.13836	0.20031	0.456757	0.632066	0.744858	0.751064	0.763479	0.764944
35.3667	0.138974	0.200051	0.44885	0.640792	0.732684	0.770901	0.764219	0.76492
35.4833	0.143088	0.204647	0.461819	0.635502	0.73838	0.75841	0.770028	0.771744
35.6	0.132277	0.198169	0.467238	0.639952	0.763098	0.752883	0.746398	0.788355
35.7167	0.137628	0.206087	0.464077	0.652553	0.743028	0.757199	0.766836	0.780581
35.8333	0.136304	0.201941	0.465867	0.654567	0.743667	0.73673	0.763392	0.790834
35.95	0.137523	0.201668	0.455285	0.630314	0.739069	0.749367	0.762901	0.779238
36.0667	0.138137	0.194731	0.465452	0.638288	0.720011	0.771605	0.776444	0.78137
36.1833	0.13975	0.197313	0.458015	0.642389	0.748723	0.742011	0.768698	0.777152
36.3	0.133991	0.198126	0.463331	0.626425	0.739883	0.740492	0.771545	0.766917
36.4167	0.134642	0.202387	0.459283	0.640983	0.724256	0.762975	0.73632	0.751672

## Sheet: Acp1 and Mrp21 amplitudes
valinomycin (nM)	Acp1	Mrp21
0	1	1
0.316	0.96368	0.926007
1	0.949377	0.938631
3.16	0.911331	0.96141
10	0.755781	0.809706
31.6	0.470938	0.458851
100	0.208091	0.321916
316	0.140519	0.15996

## Sheet: LDDD primary data n1
val (nM)	0	0.32	1	3.2	10	32	100	316
time (min)
0	0.00093	0.000829	0.000886	0.000695	0.000805	0.00088	0.000678	0.001077
0.533333	0.007585	0.009121	0.009427	0.008969	0.007061	0.006657	0.006581	0.00692
0.65	0.008663	0.010304	0.010001	0.009496	0.008655	0.007564	0.007817	0.008506
0.766666	0.010512	0.012798	0.013489	0.011523	0.010116	0.008631	0.009384	0.008537
0.883333	0.015728	0.017471	0.015753	0.015283	0.013697	0.010213	0.009221	0.010429
1	0.01873	0.022248	0.021151	0.018602	0.015493	0.012636	0.010836	0.010815
1.11667	0.023671	0.028443	0.027363	0.02398	0.017957	0.01459	0.012325	0.01235
1.23333	0.031017	0.035402	0.033915	0.029588	0.020776	0.016394	0.01338	0.012612
1.35	0.038118	0.041697	0.041429	0.033802	0.02353	0.019589	0.013918	0.013512
1.46667	0.045034	0.052629	0.051369	0.040596	0.028077	0.021438	0.014919	0.016354
1.58333	0.051152	0.063425	0.06362	0.049047	0.031053	0.025087	0.01494	0.017486
1.7	0.060342	0.075753	0.069559	0.05719	0.036237	0.027027	0.016961	0.017531
1.81667	0.069945	0.084051	0.082964	0.06314	0.040206	0.029135	0.017621	0.019534
1.93333	0.079107	0.099818	0.095423	0.073018	0.046982	0.032604	0.019355	0.020251
2.05	0.091291	0.111139	0.103883	0.085325	0.052941	0.037149	0.021105	0.021122
2.16667	0.103004	0.130537	0.119905	0.092389	0.057996	0.038574	0.020486	0.021745
2.28333	0.115394	0.12996	0.123978	0.102985	0.062304	0.041538	0.021866	0.022547
2.4	0.123476	0.147742	0.144797	0.114837	0.065931	0.044419	0.02213	0.023828
2.51667	0.133675	0.166833	0.161213	0.122679	0.073022	0.048849	0.022987	0.024628
2.63333	0.135272	0.177959	0.164009	0.148704	0.07706	0.052584	0.024214	0.025643
2.75	0.156423	0.185765	0.190714	0.146818	0.0832	0.057013	0.025177	0.025932
2.86667	0.156076	0.204333	0.202241	0.158545	0.092088	0.062185	0.026804	0.029088
2.98333	0.193661	0.224927	0.225384	0.177423	0.095531	0.064775	0.027148	0.028914
3.1	0.189817	0.240276	0.229297	0.1839	0.100721	0.067238	0.028807	0.030585
3.21667	0.203434	0.275101	0.243043	0.202773	0.106712	0.069931	0.028602	0.02979
3.33333	0.214189	0.276279	0.25989	0.195888	0.115622	0.072939	0.030218	0.030972
3.45	0.244273	0.296466	0.281522	0.210511	0.122407	0.079249	0.029694	0.031315
3.56667	0.236868	0.311142	0.28878	0.220096	0.130474	0.081176	0.032211	0.032308
3.68333	0.255044	0.331511	0.304407	0.235562	0.131376	0.087777	0.032727	0.033716
3.8	0.264102	0.352463	0.333569	0.250872	0.132941	0.087445	0.034622	0.032434
3.91667	0.287249	0.358481	0.33444	0.26522	0.132858	0.090923	0.034946	0.034688
4.03333	0.294773	0.390237	0.358111	0.273156	0.144702	0.095719	0.034926	0.036625
4.15	0.309459	0.38863	0.373532	0.287864	0.151246	0.09811	0.036958	0.037965
4.26667	0.314814	0.393493	0.383028	0.281617	0.15971	0.10203	0.037513	0.037874
4.38333	0.341503	0.424823	0.38154	0.302493	0.182376	0.105669	0.036978	0.039272
4.5	0.335559	0.431166	0.391578	0.306826	0.172477	0.10939	0.036182	0.040965
4.61667	0.348627	0.441518	0.4226	0.331691	0.18033	0.114225	0.038374	0.039573
4.73333	0.356059	0.453707	0.438249	0.340067	0.181599	0.12176	0.041193	0.041286
4.85	0.360505	0.48405	0.455588	0.352221	0.198164	0.124421	0.041088	0.041005
4.96667	0.384964	0.500353	0.45896	0.374793	0.194073	0.12199	0.043186	0.043239
5.08333	0.412757	0.513413	0.493585	0.377439	0.215929	0.126511	0.043846	0.044222
5.2	0.417491	0.515346	0.517059	0.379946	0.210961	0.129277	0.044761	0.045268
5.31667	0.418062	0.51918	0.486625	0.38317	0.223563	0.138199	0.043879	0.042806
5.43333	0.436133	0.5263	0.526224	0.40913	0.234283	0.147514	0.044482	0.044868
5.55	0.457352	0.580218	0.5368	0.405951	0.220973	0.144821	0.045437	0.045776
5.66667	0.46568	0.575912	0.558067	0.414812	0.239857	0.139588	0.047034	0.046653
5.78333	0.459091	0.586055	0.557431	0.425952	0.243666	0.155979	0.047242	0.047069
5.9	0.46968	0.590828	0.548646	0.451043	0.251377	0.156067	0.047382	0.045817
6.01667	0.48853	0.60604	0.563469	0.452942	0.26802	0.168899	0.048568	0.046422
6.13333	0.492416	0.644555	0.57775	0.47115	0.267319	0.158629	0.047556	0.048307
6.25	0.515834	0.614211	0.579493	0.455162	0.267502	0.171284	0.049867	0.051097
6.36667	0.496993	0.643119	0.61126	0.481176	0.281151	0.176057	0.050038	0.050516
6.48333	0.523464	0.639785	0.604776	0.46589	0.276118	0.16961	0.050624	0.050637
6.6	0.525086	0.657087	0.618547	0.495181	0.289356	0.172284	0.051394	0.049276
6.71667	0.538743	0.681906	0.63334	0.482069	0.283566	0.178433	0.051529	0.05331
6.83333	0.557748	0.678293	0.636627	0.497404	0.297779	0.185551	0.051255	0.05164
6.95	0.550343	0.723904	0.651742	0.51419	0.311936	0.174208	0.054352	0.054386
7.06667	0.595244	0.699105	0.655227	0.533746	0.303091	0.175988	0.053272	0.052543
7.18333	0.580696	0.712694	0.659899	0.522453	0.319041	0.192583	0.053195	0.054719
7.3	0.576872	0.738116	0.670781	0.537499	0.310961	0.181241	0.056814	0.055242
7.41666	0.58742	0.734323	0.678798	0.538541	0.31983	0.189832	0.056304	0.054716
7.53333	0.582352	0.72788	0.673566	0.533541	0.320279	0.192576	0.056572	0.0538
7.65	0.581516	0.741459	0.688937	0.55044	0.340404	0.203258	0.05768	0.055219
7.76666	0.608567	0.771024	0.68606	0.544238	0.317374	0.191113	0.056863	0.056204
7.88333	0.621837	0.753853	0.69967	0.576457	0.3436	0.196908	0.058867	0.057646
8	0.638301	0.758926	0.729315	0.575341	0.339676	0.202834	0.058567	0.058358
8.11666	0.652617	0.804067	0.709038	0.57551	0.353829	0.206877	0.059205	0.059688
8.23333	0.602463	0.763287	0.736373	0.569744	0.356289	0.20429	0.059707	0.058409
8.35	0.642598	0.79298	0.726067	0.58744	0.350494	0.212734	0.061317	0.057777
8.46666	0.640939	0.796615	0.727498	0.583334	0.377658	0.211582	0.061008	0.058644
8.58333	0.642882	0.818878	0.737846	0.603044	0.36282	0.214162	0.061143	0.060001
8.7	0.654669	0.83367	0.740955	0.603782	0.363345	0.215827	0.063365	0.059942
8.81666	0.65404	0.831899	0.755433	0.617625	0.37851	0.214046	0.064343	0.06025
8.93333	0.646689	0.832022	0.76931	0.597781	0.383858	0.216607	0.064933	0.060541
9.05	0.694678	0.825425	0.780558	0.620153	0.383043	0.213901	0.063792	0.060565
9.16666	0.688629	0.838443	0.75549	0.620071	0.397824	0.215961	0.06517	0.0603
9.28333	0.7162	0.843731	0.772489	0.627529	0.378247	0.218995	0.063792	0.062762
9.4	0.691472	0.846819	0.794444	0.645926	0.393563	0.229529	0.0644	0.0641
9.51666	0.704324	0.845951	0.752601	0.64815	0.384509	0.221092	0.065727	0.062905
9.63333	0.713227	0.867433	0.777972	0.630945	0.390157	0.219169	0.065128	0.065562
9.75	0.715219	0.846355	0.794645	0.652012	0.406605	0.222837	0.066955	0.062815
9.86666	0.714638	0.878266	0.786748	0.634725	0.397308	0.230129	0.064489	0.062429
9.98333	0.720034	0.87066	0.774403	0.650873	0.410634	0.23005	0.068203	0.06574
10.1	0.698683	0.900556	0.797172	0.641274	0.409535	0.223807	0.067172	0.067813
10.2167	0.708157	0.831493	0.79636	0.646726	0.419884	0.232706	0.069373	0.068833
10.3333	0.739917	0.864339	0.815185	0.68754	0.410887	0.227242	0.069092	0.067189
10.45	0.709418	0.896494	0.830388	0.653785	0.410694	0.225137	0.069926	0.067061
10.5667	0.731781	0.86018	0.796301	0.650707	0.430418	0.244317	0.067655	0.068038
10.6833	0.714865	0.882796	0.811279	0.651562	0.426667	0.246143	0.068645	0.068464
10.8	0.742345	0.879792	0.837277	0.655035	0.423783	0.237079	0.070317	0.069187
10.9167	0.746959	0.885334	0.811568	0.64344	0.431825	0.241486	0.069197	0.069554
11.0333	0.743141	0.898872	0.854757	0.683739	0.424729	0.238931	0.070361	0.071553
11.15	0.735973	0.872902	0.812847	0.690077	0.449214	0.223589	0.070598	0.071851
11.2667	0.726333	0.918617	0.827237	0.68701	0.466527	0.239482	0.071672	0.074072
11.3833	0.780025	0.909574	0.838	0.66639	0.440343	0.242635	0.071528	0.071425
11.5	0.751894	0.904836	0.82437	0.67599	0.444244	0.244681	0.070928	0.070154
11.6167	0.741771	0.894253	0.823557	0.704847	0.433248	0.245244	0.071972	0.073341
11.7333	0.781353	0.890415	0.821641	0.685894	0.448614	0.24585	0.073989	0.07304
11.85	0.758042	0.910873	0.852499	0.696912	0.454695	0.24991	0.071177	0.071584
11.9667	0.771479	0.899258	0.843577	0.71034	0.448815	0.251275	0.073293	0.073947
12.0833	0.748889	0.897872	0.829675	0.705616	0.46735	0.262714	0.074355	0.073226
12.2	0.759707	0.912597	0.860078	0.702285	0.464775	0.253038	0.074281	0.073757
12.3167	0.77483	0.934863	0.844448	0.709381	0.463568	0.261551	0.073298	0.074244
12.4333	0.74523	0.904747	0.82481	0.735051	0.462079	0.276076	0.075085	0.072786
12.55	0.782499	0.911061	0.853696	0.712017	0.464217	0.268471	0.073969	0.07466
12.6667	0.78682	0.919485	0.853175	0.713476	0.470764	0.260581	0.075928	0.07653
12.7833	0.765637	0.95081	0.84957	0.686203	0.484554	0.267399	0.076115	0.074837
12.9	0.79882	0.918663	0.830023	0.724232	0.469131	0.274238	0.077315	0.077342
13.0167	0.787553	0.92218	0.843827	0.709361	0.482151	0.274946	0.07653	0.078968
13.1333	0.775121	0.940194	0.84883	0.72391	0.490283	0.275175	0.076072	0.078116
13.25	0.80531	0.930877	0.861375	0.701795	0.471137	0.285238	0.074125	0.07856
13.3667	0.793254	0.947971	0.869827	0.733186	0.504732	0.283592	0.077178	0.078029
13.4833	0.802872	0.944283	0.866397	0.690972	0.47476	0.274261	0.077233	0.076281
13.6	0.804219	0.900335	0.848467	0.734517	0.498503	0.281233	0.07528	0.076386
13.7167	0.792954	0.919267	0.84924	0.720848	0.521034	0.292947	0.078242	0.078425
13.8333	0.817187	0.954892	0.862568	0.749678	0.499725	0.276904	0.077067	0.079296
13.95	0.819669	0.942813	0.853351	0.716205	0.500262	0.281035	0.07933	0.078749
14.0667	0.806082	0.949013	0.861951	0.734259	0.492515	0.269277	0.078913	0.0815
14.1833	0.810843	0.970059	0.860061	0.732267	0.502766	0.267445	0.076281	0.079655
14.3	0.779611	0.952397	0.843038	0.736263	0.499404	0.274359	0.079202	0.07827
14.4167	0.789966	0.949483	0.864416	0.727376	0.520616	0.255852	0.078882	0.080229
14.5333	0.820453	0.959797	0.915445	0.740248	0.514365	0.268476	0.079412	0.082369
14.65	0.80539	0.932343	0.88008	0.747677	0.500947	0.279164	0.07946	0.082863
14.7667	0.800864	0.930702	0.845747	0.718699	0.517024	0.281223	0.080135	0.081863
14.8833	0.841536	0.927732	0.867177	0.73183	0.524311	0.2846	0.080498	0.083813
15	0.799655	0.935295	0.874958	0.720046	0.507436	0.28775	0.079575	0.083866
15.1167	0.80526	0.949038	0.857631	0.730436	0.510292	0.280713	0.081121	0.080177
15.2333	0.804341	0.922101	0.847506	0.725582	0.532643	0.269929	0.080693	0.082673
15.35	0.826261	0.964588	0.863972	0.732348	0.528953	0.277732	0.081829	0.081537
15.4667	0.806505	0.946928	0.849631	0.734606	0.533508	0.292081	0.082343	0.084454
15.5833	0.799397	0.964536	0.885769	0.723574	0.539847	0.283416	0.081429	0.084623
15.7	0.835124	0.938526	0.869415	0.733839	0.516697	0.307473	0.082884	0.085792
15.8167	0.803602	0.964983	0.886247	0.7337	0.521668	0.302086	0.083679	0.084686
15.9333	0.830482	0.935596	0.863461	0.750497	0.545883	0.282059	0.082938	0.086037
16.05	0.823169	0.95583	0.862177	0.725754	0.511987	0.295397	0.082873	0.084344
16.1667	0.81445	0.970038	0.855196	0.727034	0.547993	0.316135	0.082628	0.082947
16.2833	0.826213	0.982685	0.868367	0.739431	0.553343	0.284908	0.08234	0.085257
16.4	0.842408	0.960024	0.887147	0.746684	0.541574	0.293196	0.083083	0.08493
16.5167	0.826235	0.971062	0.878186	0.758256	0.551784	0.301794	0.084058	0.084301
16.6333	0.834789	0.97261	0.878692	0.75042	0.562596	0.287437	0.085177	0.086084
16.75	0.849359	0.967153	0.885081	0.750014	0.557455	0.298187	0.085517	0.087902
16.8667	0.821239	0.955649	0.866792	0.729729	0.536103	0.303965	0.082931	0.08696
16.9833	0.840243	0.973096	0.865724	0.733569	0.560566	0.307716	0.083873	0.086967
17.1	0.84464	0.972455	0.851615	0.738253	0.55417	0.306516	0.084736	0.090478
17.2167	0.812775	0.96133	0.847192	0.754902	0.543197	0.302375	0.085746	0.084925
17.3333	0.852164	0.953828	0.861861	0.752622	0.555019	0.309165	0.089233	0.087311
17.45	0.82854	0.945942	0.879412	0.748795	0.555304	0.293895	0.084468	0.086254
17.5667	0.840594	0.969682	0.8717	0.764359	0.575644	0.308665	0.086758	0.089346
17.6833	0.836149	0.963436	0.854007	0.737855	0.572302	0.305995	0.08454	0.088697
17.8	0.813598	0.977386	0.860911	0.770323	0.563391	0.312667	0.087422	0.089089
17.9167	0.856107	0.979716	0.86145	0.734169	0.570388	0.310799	0.089312	0.087813
18.0333	0.835066	0.944474	0.840141	0.718196	0.558323	0.296938	0.0864	0.090657
18.15	0.83165	0.936056	0.870945	0.753838	0.565795	0.320864	0.085607	0.090587
18.2667	0.842748	0.929595	0.877127	0.767189	0.558647	0.310846	0.086378	0.091723
18.3833	0.821064	0.961946	0.846319	0.72344	0.568094	0.309944	0.085258	0.090673
18.5	0.827527	0.944493	0.855751	0.730692	0.575698	0.307379	0.087281	0.088691
18.6167	0.841734	0.946738	0.863154	0.737869	0.586044	0.303846	0.086369	0.090676
18.7333	0.850509	0.975995	0.863978	0.751866	0.579223	0.316602	0.086342	0.09422
18.85	0.866411	0.950022	0.884877	0.721139	0.564603	0.304823	0.086532	0.093536
18.9667	0.843545	0.952083	0.853197	0.749169	0.573318	0.31861	0.085807	0.090799
19.0833	0.855471	0.944038	0.851478	0.741909	0.589557	0.319985	0.087449	0.091552
19.2	0.841915	0.962207	0.883742	0.747965	0.595014	0.317754	0.089569	0.091601
19.3167	0.845498	0.963313	0.870423	0.759633	0.58846	0.321666	0.087069	0.091161
19.4333	0.844416	0.942335	0.856331	0.743794	0.573019	0.328716	0.089049	0.093775
19.55	0.842161	0.905039	0.854962	0.763949	0.590446	0.309199	0.088039	0.091985
19.6667	0.853915	0.967516	0.875801	0.747667	0.589182	0.328644	0.08852	0.090566
19.7833	0.866082	0.947511	0.850887	0.75318	0.601403	0.303918	0.088882	0.09424
19.9	0.8427	0.987532	0.860671	0.737265	0.599068	0.329306	0.088784	0.094673
20.0167	0.853018	0.976377	0.854234	0.747679	0.610034	0.30955	0.087328	0.091867
20.1333	0.842327	0.946735	0.876676	0.748087	0.611731	0.341267	0.089627	0.093453
20.25	0.843428	0.957772	0.863555	0.749983	0.608242	0.337567	0.088193	0.09357
20.3667	0.862591	0.953915	0.834855	0.74703	0.604083	0.321708	0.091059	0.093867
20.4833	0.864383	0.95666	0.830625	0.765477	0.632264	0.329983	0.086621	0.093312
20.6	0.84493	0.936839	0.843769	0.776926	0.613772	0.317247	0.090491	0.097824
20.7167	0.847905	0.946198	0.84845	0.754727	0.60967	0.316038	0.087835	0.09588
20.8333	0.873604	0.96277	0.861096	0.752636	0.608053	0.341333	0.09057	0.095825
20.95	0.857601	0.956617	0.865456	0.756692	0.616107	0.323286	0.089628	0.095925
21.0667	0.859577	0.961686	0.844805	0.734474	0.60653	0.335168	0.088759	0.095001
21.1833	0.873333	0.928066	0.875655	0.750244	0.618788	0.326295	0.089219	0.095444
21.3	0.862214	0.958981	0.874386	0.749718	0.635383	0.339275	0.088924	0.098323
21.4167	0.839354	0.963983	0.873216	0.733288	0.622612	0.336776	0.087664	0.096112
21.5333	0.845783	0.950646	0.867134	0.757955	0.620409	0.339533	0.088348	0.097702
21.65	0.867723	0.946309	0.859776	0.763682	0.633365	0.338059	0.091711	0.097109
21.7667	0.844261	0.98283	0.854539	0.745727	0.626405	0.356333	0.090071	0.0974
21.8833	0.84512	0.964346	0.855394	0.772577	0.649889	0.334014	0.091868	0.096251
22	0.875657	0.954404	0.853397	0.761786	0.636785	0.34413	0.088027	0.095896
22.1167	0.866159	0.933795	0.862777	0.751544	0.641655	0.331733	0.088018	0.096804
22.2333	0.858629	0.965368	0.84392	0.754162	0.634419	0.338654	0.093117	0.095982
22.35	0.848302	0.957278	0.819028	0.747584	0.632333	0.349464	0.089403	0.096414
22.4667	0.883425	0.923341	0.840346	0.744688	0.642926	0.343482	0.089395	0.096853
22.5833	0.829531	0.96502	0.853886	0.743266	0.648081	0.335735	0.09084	0.100213
22.7	0.883897	0.981355	0.872414	0.752399	0.654314	0.344735	0.091054	0.09833
22.8167	0.84603	0.952541	0.874181	0.761843	0.624265	0.342082	0.090346	0.095992
22.9333	0.845345	0.963229	0.846671	0.752134	0.640348	0.353907	0.092632	0.096858
23.05	0.871859	0.940469	0.857502	0.760433	0.672594	0.345878	0.088938	0.097966
23.1667	0.84979	1	0.864749	0.736137	0.653562	0.354022	0.092918	0.099206
23.2833	0.849495	0.972423	0.840647	0.771668	0.652257	0.354848	0.090053	0.100125
23.4	0.87428	0.949233	0.849272	0.741283	0.657775	0.361794	0.09372	0.096997
23.5167	0.88199	0.954233	0.867384	0.740579	0.664934	0.354005	0.091763	0.102029
23.6333	0.866562	0.960808	0.843252	0.762198	0.648694	0.3626	0.090837	0.099325
23.75	0.86938	0.975054	0.881562	0.755114	0.637497	0.345574	0.09007	0.099985
23.8667	0.883669	0.943215	0.860055	0.761974	0.655633	0.368086	0.090204	0.104016
23.9833	0.867773	0.950562	0.852667	0.768277	0.624211	0.360726	0.092265	0.09877
24.1	0.896006	0.963365	0.855494	0.775902	0.671305	0.355476	0.091683	0.100002
24.2167	0.86956	0.980888	0.867498	0.779468	0.671538	0.338658	0.092252	0.102203
24.3333	0.853516	0.949216	0.847166	0.773407	0.661175	0.368788	0.091553	0.101013
24.45	0.879792	0.974921	0.85865	0.763723	0.644603	0.361894	0.090795	0.100802
24.5667	0.884256	0.985485	0.861949	0.768408	0.660485	0.351042	0.091866	0.101985
24.6833	0.869286	0.96797	0.848679	0.764023	0.679448	0.353703	0.090387	0.100316
24.8	0.864835	0.952639	0.85235	0.765929	0.644702	0.364074	0.095081	0.104249
24.9167	0.895098	0.961586	0.852328	0.762279	0.6649	0.356105	0.091537	0.103047
25.0333	0.892302	0.985453	0.843693	0.726636	0.675162	0.380283	0.089719	0.102692
25.15	0.857748	0.953886	0.856189	0.755838	0.656948	0.351012	0.08986	0.103944
25.2667	0.871795	0.946604	0.83903	0.76062	0.674858	0.376685	0.091806	0.103975
25.3833	0.885216	0.974292	0.860362	0.749804	0.662396	0.35345	0.090695	0.10101
25.5	0.879195	0.986243	0.838594	0.746775	0.668789	0.375902	0.092851	0.101423
25.6167	0.888269	0.963671	0.852371	0.757236	0.665914	0.360802	0.091578	0.104262
25.7333	0.875639	0.966125	0.846595	0.748118	0.698889	0.357953	0.090764	0.104269
25.85	0.85697	0.954726	0.844088	0.765515	0.665355	0.365381	0.090589	0.104643
25.9667	0.903855	0.9934	0.836063	0.769207	0.665812	0.369252	0.094212	0.104132
26.0833	0.875752	0.959865	0.861855	0.770616	0.680827	0.392161	0.090989	0.102344
26.2	0.867977	0.953715	0.803503	0.76381	0.664466	0.355875	0.090446	0.104529
26.3167	0.866604	0.928618	0.837836	0.771945	0.669563	0.370808	0.094208	0.105303
26.4333	0.880985	0.962912	0.856328	0.739036	0.670994	0.38235	0.091113	0.104873
26.55	0.873261	0.946838	0.853841	0.762952	0.688757	0.369866	0.09422	0.106808
26.6667	0.868951	0.939987	0.827415	0.77457	0.682851	0.376594	0.091796	0.103812
26.7833	0.869266	0.940019	0.847285	0.75549	0.698474	0.372049	0.093103	0.104008
26.9	0.85759	0.971244	0.853114	0.749486	0.68636	0.36199	0.092417	0.104097
27.0167	0.879535	0.970599	0.846804	0.758811	0.702254	0.372287	0.093467	0.106315
27.1333	0.877479	0.970318	0.836966	0.744156	0.682025	0.360658	0.092991	0.103979
27.25	0.883492	0.955352	0.840236	0.757326	0.68999	0.377937	0.09313	0.106815
27.3667	0.874208	0.951866	0.826517	0.749469	0.682	0.372979	0.091282	0.106905
27.4833	0.884977	0.950943	0.821299	0.735962	0.681277	0.365635	0.093017	0.104992
27.6	0.873801	0.959691	0.824541	0.779292	0.702921	0.374816	0.093525	0.107375
27.7167	0.88581	0.951915	0.837433	0.76001	0.693201	0.376244	0.092299	0.105533
27.8333	0.881978	0.960685	0.833722	0.759	0.710175	0.368893	0.089697	0.105389
27.95	0.885999	0.968719	0.827561	0.76399	0.703692	0.380394	0.094457	0.106899
28.0667	0.854829	0.950897	0.836822	0.766713	0.694486	0.381586	0.09386	0.105929
28.1833	0.860798	0.932946	0.849651	0.77639	0.698719	0.383064	0.093957	0.107333
28.3	0.89751	0.966098	0.827518	0.765642	0.681477	0.379032	0.092226	0.108131
28.4167	0.899193	0.971962	0.84125	0.763284	0.710399	0.360505	0.091716	0.107115
28.5333	0.884647	0.960133	0.853108	0.763475	0.698682	0.393304	0.094098	0.10609
28.65	0.890274	0.960212	0.815314	0.770644	0.710909	0.389518	0.092622	0.111181
28.7667	0.889473	0.95841	0.822677	0.756209	0.709132	0.380314	0.093409	0.109906
28.8833	0.880779	0.956806	0.818648	0.761767	0.705165	0.394695	0.093409	0.107755
29	0.909398	0.956388	0.836797	0.769381	0.707303	0.389469	0.092619	0.107698
29.1167	0.8785	0.972639	0.820617	0.766368	0.700257	0.369936	0.093768	0.107488
29.2333	0.878552	0.968804	0.835237	0.77647	0.708203	0.38638	0.093518	0.10937
29.35	0.8847	0.959577	0.833601	0.75149	0.675135	0.382153	0.092316	0.106435
29.4667	0.895254	0.925081	0.837677	0.763817	0.716354	0.391179	0.093016	0.107521
29.5833	0.869664	0.938645	0.845899	0.744096	0.697043	0.38427	0.091295	0.107035
29.7	0.883835	0.946081	0.823633	0.78656	0.717896	0.381678	0.09015	0.106697
29.8167	0.896246	0.953308	0.830454	0.754559	0.744975	0.393963	0.09414	0.105975
29.9333	0.879271	0.945303	0.82552	0.766997	0.726568	0.391078	0.092563	0.11038
30.05	0.861268	0.938891	0.830642	0.751706	0.68036	0.387635	0.095997	0.10955
30.1667	0.911471	0.931876	0.828822	0.773264	0.708297	0.390228	0.094532	0.108506
30.2833	0.8962	0.922917	0.832445	0.762388	0.724694	0.41658	0.094152	0.108178
30.4	0.87328	0.947545	0.818136	0.756529	0.716191	0.386823	0.09565	0.108559
30.5167	0.889847	0.961006	0.825038	0.767291	0.730844	0.39777	0.095738	0.108419

## Sheet: LDDD primary data n2
val (nM)	0	0.32	1	3.2	10	32	100	316
time (min)
0	0.00138835	0.001203	0.001123	0.001026	0.00107	0.000956	0.001065	0.00132
0.533333	0.0283808	0.043298	0.041154	0.043971	0.032154	0.033134	0.029979	0.030051
0.65	0.0305653	0.042298	0.04315	0.042805	0.03451	0.034405	0.02965	0.030931
0.766666	0.0366499	0.045919	0.047203	0.045646	0.035191	0.034673	0.031676	0.032786
0.883333	0.0403016	0.051463	0.049901	0.047768	0.037506	0.036569	0.033693	0.033439
1	0.0473882	0.05761	0.0541	0.052253	0.041374	0.037346	0.033125	0.034864
1.11667	0.0531739	0.063337	0.062162	0.056455	0.042795	0.037221	0.035027	0.035499
1.23333	0.061077	0.069959	0.068827	0.062729	0.047834	0.039966	0.035434	0.036875
1.35	0.0725498	0.076368	0.077479	0.065367	0.050752	0.040824	0.036092	0.03793
1.46667	0.0848595	0.086986	0.088198	0.076775	0.055562	0.042013	0.036886	0.03987
1.58333	0.0908165	0.098262	0.092787	0.085072	0.059636	0.044041	0.038091	0.039674
1.7	0.103913	0.110878	0.099966	0.094016	0.066734	0.044881	0.040157	0.041193
1.81667	0.11762	0.11933	0.118186	0.099702	0.077942	0.046058	0.041121	0.043493
1.93333	0.134303	0.146825	0.130506	0.113559	0.072477	0.047987	0.04189	0.044355
2.05	0.136373	0.142447	0.149224	0.116522	0.079587	0.049446	0.043232	0.044479
2.16667	0.153932	0.169461	0.162355	0.141816	0.086198	0.050668	0.043759	0.044946
2.28333	0.167906	0.186046	0.176701	0.141017	0.099624	0.053655	0.045702	0.047445
2.4	0.185541	0.18847	0.178158	0.153449	0.103713	0.053501	0.047242	0.047837
2.51667	0.209796	0.210807	0.203091	0.163902	0.107306	0.056725	0.047289	0.048187
2.63333	0.219565	0.2344	0.216042	0.172478	0.112206	0.05609	0.047515	0.049064
2.75	0.229585	0.240068	0.238302	0.184845	0.121739	0.05961	0.04976	0.052272
2.86667	0.253872	0.274121	0.242231	0.200907	0.12767	0.060303	0.048834	0.051352
2.98333	0.2667	0.290117	0.260727	0.222564	0.136673	0.062936	0.051829	0.053157
3.1	0.279342	0.28855	0.2739	0.23904	0.139002	0.064893	0.05147	0.053181
3.21667	0.299601	0.311189	0.284759	0.232698	0.151035	0.065696	0.051387	0.055249
3.33333	0.320857	0.316619	0.316868	0.257865	0.164914	0.065733	0.051856	0.057225
3.45	0.327418	0.35071	0.317848	0.269317	0.168274	0.072692	0.054202	0.057118
3.56667	0.357253	0.360748	0.328796	0.265993	0.171014	0.066631	0.055332	0.058917
3.68333	0.364982	0.368185	0.343301	0.287569	0.179797	0.073414	0.057191	0.059719
3.8	0.374729	0.389276	0.364418	0.304618	0.184604	0.075089	0.057369	0.059427
3.91667	0.402655	0.400006	0.378043	0.328583	0.198466	0.076863	0.058292	0.05914
4.03333	0.41181	0.425465	0.394153	0.323048	0.199787	0.076787	0.058941	0.060244
4.15	0.414741	0.447531	0.410523	0.338497	0.21742	0.074974	0.059058	0.062897
4.26667	0.437839	0.455713	0.42291	0.347835	0.225631	0.086675	0.059822	0.065638
4.38333	0.462376	0.468721	0.429369	0.363465	0.228963	0.075463	0.06097	0.062528
4.5	0.456811	0.481659	0.462103	0.373934	0.22706	0.083944	0.063151	0.063244
4.61667	0.471428	0.500135	0.460409	0.382173	0.247891	0.086867	0.062842	0.065265
4.73333	0.4936	0.520179	0.47894	0.401591	0.257833	0.084024	0.063671	0.061603
4.85	0.507151	0.530445	0.506914	0.40729	0.267764	0.088978	0.063567	0.063903
4.96667	0.528399	0.537388	0.510231	0.432557	0.279099	0.096256	0.061348	0.067338
5.08333	0.517707	0.549108	0.527893	0.435545	0.276488	0.096724	0.065081	0.066547
5.2	0.550015	0.559225	0.537595	0.452489	0.27922	0.094256	0.065024	0.070421
5.31667	0.564015	0.585085	0.534167	0.462051	0.296602	0.09798	0.067051	0.067798
5.43333	0.561055	0.61371	0.541629	0.471842	0.30004	0.087056	0.063973	0.067218
5.55	0.594465	0.61552	0.57284	0.489268	0.302471	0.09819	0.06743	0.067677
5.66667	0.604346	0.635389	0.585153	0.506909	0.303601	0.097604	0.070908	0.07182
5.78333	0.607883	0.652583	0.603366	0.511005	0.323678	0.101205	0.065982	0.069181
5.9	0.608887	0.634496	0.614546	0.520992	0.324961	0.092957	0.070866	0.070454
6.01667	0.631561	0.672324	0.626318	0.520855	0.333208	0.105913	0.072597	0.070064
6.13333	0.63914	0.669065	0.610814	0.518758	0.345587	0.105055	0.071129	0.071561
6.25	0.641763	0.699592	0.637418	0.550854	0.345207	0.108728	0.074835	0.069664
6.36667	0.666838	0.690441	0.650162	0.564831	0.347747	0.107686	0.070685	0.07758
6.48333	0.662782	0.724924	0.638717	0.562996	0.364827	0.113796	0.075236	0.072849
6.6	0.668565	0.716637	0.671643	0.576001	0.370451	0.116617	0.071281	0.075052
6.71667	0.68372	0.722733	0.665301	0.581835	0.375058	0.111612	0.07307	0.072299
6.83333	0.695101	0.726359	0.679465	0.588105	0.376099	0.115797	0.07683	0.075637
6.95	0.684972	0.741539	0.714099	0.60375	0.383823	0.11112	0.080565	0.07673
7.06667	0.72513	0.756278	0.70166	0.613101	0.380796	0.117615	0.073528	0.077464
7.18333	0.738825	0.76885	0.702048	0.631624	0.398587	0.121937	0.075178	0.069727
7.3	0.732619	0.754099	0.717275	0.621047	0.406529	0.114557	0.080538	0.07194
7.41666	0.734602	0.792654	0.718111	0.638137	0.408859	0.127958	0.079478	0.077533
7.53333	0.755711	0.774007	0.733587	0.63674	0.417644	0.124804	0.078899	0.079502
7.65	0.7518	0.792526	0.744264	0.643753	0.413806	0.122066	0.083692	0.072969
7.76666	0.776413	0.798489	0.748356	0.636172	0.417823	0.120583	0.078164	0.083206
7.88333	0.769905	0.80287	0.754216	0.645638	0.420858	0.124779	0.079581	0.085299
8	0.783706	0.823289	0.75971	0.659509	0.42736	0.121478	0.080955	0.080423
8.11666	0.796818	0.834982	0.7676	0.663085	0.434472	0.125036	0.078852	0.081281
8.23333	0.776197	0.815015	0.774396	0.67007	0.454595	0.123129	0.0841	0.08123
8.35	0.783627	0.812213	0.76744	0.671186	0.454991	0.131226	0.083017	0.078612
8.46666	0.82121	0.845511	0.774985	0.684927	0.452824	0.127987	0.088972	0.076683
8.58333	0.791864	0.848127	0.78152	0.698815	0.466389	0.131672	0.084049	0.085475
8.7	0.78127	0.845419	0.79412	0.694675	0.474005	0.136182	0.084254	0.076205
8.81666	0.806583	0.870671	0.784958	0.705549	0.474276	0.127477	0.085295	0.079588
8.93333	0.820181	0.862245	0.791739	0.706602	0.480002	0.13008	0.080526	0.083279
9.05	0.819704	0.85143	0.800323	0.72026	0.483987	0.134548	0.081051	0.08246
9.16666	0.825061	0.861186	0.833244	0.707297	0.486598	0.13599	0.081063	0.08336
9.28333	0.831826	0.875033	0.813973	0.715363	0.476485	0.142687	0.089339	0.079925
9.4	0.839282	0.894235	0.816879	0.716685	0.488459	0.136007	0.077151	0.082554
9.51666	0.854394	0.881743	0.842212	0.739369	0.494904	0.13363	0.082099	0.087157
9.63333	0.858278	0.895113	0.823411	0.724729	0.489458	0.14175	0.085442	0.084161
9.75	0.843071	0.905679	0.83206	0.747416	0.512289	0.149654	0.090563	0.081887
9.86666	0.857537	0.911594	0.854622	0.745762	0.515735	0.140182	0.083975	0.090414
9.98333	0.854917	0.904686	0.857312	0.757382	0.51664	0.142857	0.085854	0.089288
10.1	0.852975	0.898982	0.849826	0.766218	0.52362	0.143294	0.083156	0.090992
10.2167	0.872651	0.915421	0.837271	0.768035	0.507175	0.15352	0.089938	0.086039
10.3333	0.883637	0.916006	0.839828	0.774204	0.529192	0.146432	0.082692	0.08666
10.45	0.872864	0.911549	0.872959	0.774197	0.544218	0.143624	0.090304	0.090239
10.5667	0.86317	0.930915	0.855733	0.780595	0.536683	0.149044	0.093761	0.089147
10.6833	0.848711	0.915474	0.843883	0.783309	0.538483	0.149111	0.09084	0.092358
10.8	0.904183	0.916798	0.861817	0.746081	0.533121	0.158421	0.088655	0.089225
10.9167	0.866673	0.912821	0.870987	0.780718	0.531788	0.153943	0.08971	0.083276
11.0333	0.886826	0.956098	0.870334	0.773563	0.542022	0.153502	0.090412	0.091364
11.15	0.879101	0.920825	0.883984	0.781191	0.545227	0.15306	0.085569	0.095274
11.2667	0.874077	0.925359	0.88533	0.785164	0.562871	0.148138	0.084951	0.087409
11.3833	0.900353	0.940632	0.889664	0.792408	0.563532	0.157142	0.095868	0.090381
11.5	0.891172	0.937948	0.914886	0.770435	0.558521	0.155011	0.096524	0.088247
11.6167	0.889688	0.921086	0.882857	0.80076	0.547168	0.159024	0.095595	0.091815
11.7333	0.889451	0.921235	0.89759	0.781271	0.558935	0.156536	0.096359	0.08897
11.85	0.919714	0.943512	0.905092	0.769356	0.570399	0.154077	0.094471	0.089423
11.9667	0.897096	0.926653	0.898944	0.795426	0.560521	0.156177	0.09773	0.089363
12.0833	0.89071	0.926678	0.885834	0.819418	0.556233	0.159452	0.095585	0.083715
12.2	0.916975	0.946919	0.887263	0.803582	0.559703	0.15996	0.089569	0.090817
12.3167	0.906822	0.959494	0.918387	0.796077	0.578857	0.157705	0.093167	0.087375
12.4333	0.916963	0.928862	0.911697	0.813473	0.578991	0.162993	0.091573	0.08854
12.55	0.924712	0.945793	0.915144	0.806314	0.567717	0.164145	0.093104	0.090519
12.6667	0.917494	0.963065	0.913995	0.793645	0.581565	0.159275	0.09743	0.094392
12.7833	0.905915	0.984241	0.908183	0.806256	0.586947	0.160393	0.093603	0.091279
12.9	0.911426	0.943054	0.898945	0.833864	0.587547	0.157138	0.093031	0.093071
13.0167	0.923294	0.957903	0.903187	0.814627	0.588214	0.164609	0.095566	0.095906
13.1333	0.924417	0.94679	0.912327	0.827298	0.578482	0.163632	0.089709	0.09276
13.25	0.925293	0.995892	0.929522	0.802923	0.586926	0.162752	0.0867	0.098605
13.3667	0.928744	0.966459	0.919573	0.815611	0.582257	0.16525	0.095067	0.09293
13.4833	0.903853	0.980913	0.912878	0.823923	0.583491	0.166918	0.096395	0.089856
13.6	0.931019	0.964742	0.902826	0.82052	0.586613	0.174084	0.099015	0.094165
13.7167	0.970757	0.961003	0.938839	0.827338	0.600467	0.158229	0.090469	0.090064
13.8333	0.920641	0.958804	0.934301	0.82484	0.578478	0.165087	0.094161	0.092173
13.95	0.902011	0.962674	0.914054	0.811547	0.594693	0.174356	0.098135	0.097292
14.0667	0.929987	0.951075	0.930606	0.853956	0.582615	0.164645	0.099522	0.0939
14.1833	0.920174	0.966897	0.915716	0.811683	0.593791	0.174943	0.097109	0.093996
14.3	0.922644	0.974785	0.934592	0.838458	0.615913	0.170238	0.097609	0.100684
14.4167	0.926835	0.942218	0.928115	0.818313	0.619285	0.171951	0.096607	0.098193
14.5333	0.939516	0.965555	0.921458	0.826813	0.628089	0.180513	0.097224	0.093214
14.65	0.94046	0.957116	0.926165	0.835831	0.593371	0.179545	0.096516	0.098754
14.7667	0.927857	0.945149	0.932076	0.842523	0.606681	0.178277	0.102214	0.095433
14.8833	0.91989	0.96669	0.934548	0.815562	0.618194	0.173174	0.104283	0.097541
15	0.909654	0.995171	0.911167	0.839856	0.608822	0.167659	0.096878	0.088477
15.1167	0.944311	0.987401	0.928665	0.825422	0.612757	0.182073	0.098946	0.100802
15.2333	0.938594	0.966192	0.93232	0.814072	0.634989	0.17204	0.099544	0.095707
15.35	0.943743	0.94693	0.925521	0.828925	0.605128	0.170566	0.100671	0.096448
15.4667	0.919089	0.956071	0.943618	0.828465	0.637182	0.177832	0.101582	0.094882
15.5833	0.928362	0.97478	0.900234	0.825685	0.616482	0.174823	0.10355	0.10059
15.7	0.920654	0.952829	0.933481	0.834813	0.623957	0.183429	0.097633	0.097314
15.8167	0.946816	0.952728	0.92568	0.825071	0.628436	0.173068	0.101695	0.098278
15.9333	0.934545	0.95931	0.916238	0.843546	0.616571	0.17443	0.102265	0.092568
16.05	0.924399	0.968415	0.927515	0.829991	0.629805	0.173156	0.106721	0.095153
16.1667	0.928166	0.988509	0.932124	0.842041	0.617587	0.174826	0.103405	0.093315
16.2833	0.92217	1	0.933754	0.836427	0.62738	0.173903	0.101122	0.099564
16.4	0.919354	0.958029	0.926921	0.840256	0.631853	0.165743	0.089233	0.097719
16.5167	0.938587	0.952896	0.925973	0.848238	0.610918	0.178873	0.10119	0.091937
16.6333	0.93881	0.993829	0.927363	0.841788	0.622022	0.174065	0.103587	0.100971
16.75	0.936014	0.962088	0.913442	0.83397	0.62839	0.184576	0.099128	0.10284
16.8667	0.92323	0.978888	0.934731	0.810625	0.636244	0.177053	0.105091	0.095269
16.9833	0.912632	0.979498	0.942084	0.84002	0.627195	0.176412	0.098701	0.096931
17.1	0.948347	0.967439	0.92205	0.83128	0.625546	0.184124	0.103119	0.089661
17.2167	0.935155	0.959915	0.907077	0.861891	0.640658	0.179935	0.099162	0.091255
17.3333	0.932666	0.97005	0.918872	0.848054	0.636379	0.180263	0.104481	0.097886
17.45	0.934628	0.990731	0.938921	0.835863	0.636919	0.177303	0.101477	0.103003
17.5667	0.932383	0.975688	0.901001	0.835442	0.650158	0.193208	0.10016	0.096035
17.6833	0.92828	0.977006	0.923122	0.832016	0.643813	0.193163	0.101536	0.094188
17.8	0.912392	0.960666	0.91781	0.824738	0.636377	0.186074	0.099881	0.096572
17.9167	0.938895	0.976029	0.915474	0.849656	0.628437	0.189836	0.104296	0.09973
18.0333	0.915044	0.934418	0.914513	0.84333	0.637147	0.183586	0.105212	0.102185
18.15	0.906209	0.969413	0.915562	0.83731	0.639687	0.186581	0.106092	0.096951
18.2667	0.94469	0.978216	0.921573	0.824124	0.629703	0.181829	0.099279	0.099702
18.3833	0.942794	0.958907	0.928171	0.837178	0.633386	0.178914	0.107248	0.09449
18.5	0.906111	0.984935	0.926809	0.816534	0.640728	0.180867	0.10727	0.100545
18.6167	0.907448	0.950852	0.903975	0.816417	0.62401	0.19	0.106013	0.097402
18.7333	0.929142	0.958892	0.914421	0.84705	0.656163	0.187836	0.099889	0.103676
18.85	0.914396	0.973064	0.916515	0.833784	0.662807	0.190449	0.104457	0.092747
18.9667	0.918841	0.967863	0.91207	0.838842	0.644286	0.177053	0.103208	0.093988
19.0833	0.917703	0.955732	0.909423	0.851077	0.636961	0.187304	0.107646	0.098066
19.2	0.92709	0.977007	0.955951	0.83244	0.65455	0.190339	0.105629	0.094687
19.3167	0.923145	0.937556	0.922201	0.837528	0.651441	0.19336	0.103986	0.101052
19.4333	0.917469	0.951512	0.898994	0.826772	0.639241	0.189019	0.10092	0.099377
19.55	0.91932	0.964397	0.923017	0.846806	0.657489	0.191453	0.103076	0.103377
19.6667	0.916889	0.943614	0.899568	0.851117	0.639466	0.193184	0.107917	0.100653
19.7833	0.91625	0.944323	0.919559	0.838278	0.639698	0.188533	0.106356	0.099863
19.9	0.926608	0.938416	0.929572	0.849555	0.658116	0.191893	0.101697	0.096027
20.0167	0.932381	0.958391	0.911931	0.836842	0.635183	0.186989	0.103959	0.094683
20.1333	0.902159	0.925273	0.898055	0.848233	0.638322	0.188182	0.100395	0.10183
20.25	0.905387	0.954619	0.911404	0.851017	0.644826	0.191056	0.09898	0.095791
20.3667	0.907489	0.960951	0.886447	0.807836	0.661054	0.205004	0.104256	0.099458
20.4833	0.913943	0.966883	0.908131	0.823637	0.653665	0.193312	0.106806	0.097758
20.6	0.939688	0.961273	0.914611	0.815214	0.645469	0.192658	0.098596	0.101263
20.7167	0.918461	0.953286	0.920147	0.853019	0.642521	0.184778	0.108673	0.096897
20.8333	0.89748	0.950997	0.911734	0.825948	0.629066	0.19687	0.101236	0.102681
20.95	0.907875	0.970455	0.9199	0.842891	0.66905	0.19164	0.10235	0.100714
21.0667	0.887551	0.921316	0.888716	0.822875	0.650159	0.186219	0.103497	0.095842
21.1833	0.885504	0.962134	0.901801	0.821328	0.665723	0.197884	0.106408	0.096362
21.3	0.922305	0.926194	0.900043	0.850255	0.647391	0.196583	0.106731	0.097894
21.4167	0.893332	0.928071	0.89058	0.86474	0.666122	0.190349	0.110123	0.096494
21.5333	0.911598	0.924194	0.887635	0.829858	0.660979	0.183831	0.102355	0.096682
21.65	0.908226	0.952143	0.898519	0.811268	0.644299	0.205371	0.104917	0.094394
21.7667	0.921103	0.956236	0.929821	0.843461	0.645306	0.196565	0.104703	0.097021
21.8833	0.893326	0.918109	0.882552	0.818518	0.668925	0.18908	0.110947	0.101283
22	0.928893	0.938704	0.877901	0.832893	0.650573	0.196097	0.108571	0.097121
22.1167	0.932477	0.936454	0.901805	0.841192	0.665727	0.207542	0.104489	0.095256
22.2333	0.894572	0.91551	0.891175	0.828183	0.651107	0.193207	0.105265	0.097965
22.35	0.92778	0.944083	0.913099	0.81152	0.635126	0.201525	0.108715	0.091555
22.4667	0.898627	0.933468	0.900915	0.823048	0.636481	0.202411	0.111641	0.103699
22.5833	0.911857	0.908615	0.880259	0.833538	0.657288	0.194939	0.109891	0.094818
22.7	0.908053	0.915466	0.908186	0.838957	0.653045	0.199076	0.101962	0.09876
22.8167	0.901447	0.948796	0.880777	0.831857	0.640119	0.200587	0.107772	0.096971
22.9333	0.885158	0.913847	0.923228	0.823426	0.640773	0.196158	0.100089	0.09442
23.05	0.925841	0.930833	0.865145	0.830003	0.64951	0.192559	0.101984	0.094978
23.1667	0.905568	0.924438	0.891369	0.82604	0.648135	0.192106	0.102808	0.099581
23.2833	0.903238	0.915126	0.893749	0.837399	0.661286	0.205857	0.106864	0.103605
23.4	0.901089	0.921815	0.892554	0.806081	0.638499	0.199725	0.10404	0.10015
23.5167	0.894878	0.902171	0.885826	0.839744	0.665168	0.203683	0.109308	0.098835
23.6333	0.886407	0.895416	0.89258	0.817189	0.658146	0.192032	0.104971	0.094762
23.75	0.905893	0.92108	0.880543	0.813345	0.662035	0.195413	0.103906	0.102398
23.8667	0.895275	0.918471	0.882501	0.802819	0.664566	0.195592	0.103598	0.096785
23.9833	0.884824	0.916976	0.85557	0.79644	0.646273	0.193869	0.109556	0.101765
24.1	0.909524	0.92778	0.89005	0.825541	0.648801	0.201306	0.108816	0.094552
24.2167	0.890369	0.911886	0.897814	0.819422	0.65564	0.20073	0.103224	0.092376
24.3333	0.892413	0.920508	0.883683	0.839045	0.644265	0.202144	0.112257	0.10039
24.45	0.879127	0.911586	0.880532	0.807885	0.648004	0.20114	0.102955	0.096157
24.5667	0.900801	0.922377	0.875723	0.814254	0.649565	0.200076	0.108981	0.096693
24.6833	0.854872	0.912075	0.890875	0.801261	0.644677	0.199603	0.104359	0.096629
24.8	0.877137	0.918113	0.880342	0.821825	0.648048	0.202327	0.1007	0.091193
24.9167	0.88317	0.906192	0.871935	0.799639	0.641564	0.195456	0.10791	0.105213
25.0333	0.890305	0.932757	0.879274	0.825553	0.652	0.193296	0.110762	0.103679
25.15	0.883928	0.902353	0.892632	0.782264	0.640233	0.201486	0.110162	0.093145
25.2667	0.888589	0.901493	0.875098	0.807492	0.667077	0.202961	0.10962	0.095065
25.3833	0.89088	0.904972	0.874414	0.816582	0.652545	0.205656	0.103104	0.098748
25.5	0.868524	0.889774	0.880873	0.803405	0.674818	0.200205	0.10869	0.096298
25.6167	0.892112	0.921359	0.863511	0.827001	0.649247	0.20365	0.102386	0.10252
25.7333	0.90032	0.904452	0.853718	0.785728	0.648247	0.204257	0.10063	0.094259
25.85	0.872471	0.878955	0.878	0.816683	0.669358	0.197244	0.111754	0.091031
25.9667	0.885278	0.925568	0.892242	0.806445	0.662795	0.197888	0.106461	0.101911
26.0833	0.87798	0.916207	0.847414	0.7796	0.64985	0.210469	0.110444	0.096711
26.2	0.892213	0.909118	0.866684	0.795747	0.645617	0.207659	0.111137	0.099485
26.3167	0.893364	0.899275	0.871366	0.797228	0.652147	0.203522	0.100469	0.098538
26.4333	0.885973	0.887887	0.856686	0.794359	0.658347	0.205564	0.103618	0.096838
26.55	0.891365	0.901937	0.867079	0.812723	0.637091	0.210265	0.109578	0.099079
26.6667	0.875664	0.897695	0.849487	0.797241	0.667336	0.206327	0.099566	0.099899
26.7833	0.88053	0.925049	0.856865	0.785795	0.641286	0.200006	0.109271	0.097111
26.9	0.864233	0.924781	0.881937	0.793836	0.64659	0.194878	0.103276	0.096266
27.0167	0.885074	0.901041	0.872357	0.805903	0.649204	0.206362	0.107183	0.091839
27.1333	0.857127	0.889809	0.856594	0.811341	0.644725	0.208855	0.107991	0.095272
27.25	0.874461	0.887816	0.87163	0.793647	0.641005	0.206761	0.109599	0.097475
27.3667	0.864012	0.894242	0.860066	0.786085	0.661401	0.203012	0.1092	0.100474
27.4833	0.891663	0.887288	0.872272	0.773568	0.641465	0.205878	0.10815	0.096883
27.6	0.877514	0.882384	0.861851	0.785082	0.652725	0.207684	0.102827	0.093089
27.7167	0.858303	0.877951	0.852985	0.815728	0.648021	0.201634	0.104961	0.099688
27.8333	0.87722	0.9151	0.833689	0.78189	0.651785	0.196543	0.105794	0.104291
27.95	0.870639	0.893804	0.854952	0.796243	0.638501	0.209557	0.106323	0.096607
28.0667	0.872266	0.912883	0.867281	0.797988	0.647178	0.205222	0.105751	0.101472
28.1833	0.872029	0.87984	0.872208	0.765778	0.640108	0.202418	0.106077	0.100845
28.3	0.847385	0.876963	0.846369	0.785791	0.642948	0.213345	0.108592	0.099182
28.4167	0.856402	0.857654	0.856583	0.773583	0.637348	0.213413	0.104071	0.095218
28.5333	0.84343	0.868449	0.863999	0.783924	0.656688	0.198794	0.110228	0.092739
28.65	0.872286	0.902403	0.862825	0.781269	0.658072	0.201398	0.106935	0.095402
28.7667	0.856367	0.880255	0.848916	0.791951	0.646282	0.197721	0.103888	0.104884
28.8833	0.862922	0.878699	0.865865	0.783304	0.65655	0.203486	0.100821	0.095916
29	0.866038	0.873282	0.84972	0.798017	0.658155	0.201342	0.103439	0.097668
29.1167	0.855671	0.873746	0.830894	0.786889	0.636716	0.204001	0.107202	0.10144
29.2333	0.860435	0.894676	0.847405	0.7591	0.649535	0.203267	0.106106	0.098556
29.35	0.844845	0.878374	0.847206	0.784853	0.642632	0.207405	0.108078	0.093343
29.4667	0.846735	0.860767	0.837695	0.75994	0.644244	0.19573	0.106427	0.091109
29.5833	0.864883	0.886043	0.8395	0.797629	0.647322	0.204232	0.105144	0.100411
29.7	0.85888	0.877255	0.85236	0.785558	0.655287	0.204164	0.11056	0.103779
29.8167	0.847488	0.861734	0.831258	0.769457	0.673337	0.200153	0.102853	0.102351
29.9333	0.865151	0.869539	0.837469	0.770123	0.65913	0.212711	0.101658	0.097479
30.05	0.852599	0.865637	0.841584	0.751544	0.647922	0.207758	0.109893	0.09721
30.1667	0.865411	0.855398	0.851459	0.764966	0.654142	0.209754	0.111432	0.100309
30.2833	0.859361	0.857861	0.842655	0.778951	0.642778	0.215093	0.1129	0.106981
30.4	0.851772	0.854694	0.857684	0.785645	0.649315	0.212363	0.110386	0.100202
30.5167	0.848382	0.849202	0.843672	0.773399	0.631567	0.204031	0.109136	0.104087

## Sheet: LDDD primary data n3
val (nM)	0	0.32	1	3.2	10	32	100	316
time (min)
0	0.00024365	0.000213	0.000245	0.000269	0.000226	0.000181	0.000207	0.000156
0.55	0.0120711	0.010367	0.016234	0.017562	0.012328	0.011059	0.011698	0.014059
0.666666	0.0141724	0.012136	0.01849	0.020589	0.013637	0.011887	0.013011	0.014726
0.783333	0.0171786	0.014093	0.021429	0.022993	0.015414	0.01324	0.014518	0.016455
0.9	0.0208158	0.017353	0.025077	0.02736	0.017629	0.014567	0.016123	0.017985
1.01667	0.0247189	0.021337	0.029359	0.030533	0.018969	0.016802	0.017696	0.019006
1.13333	0.0309902	0.026655	0.035901	0.036084	0.021554	0.01768	0.019002	0.020233
1.25	0.0354206	0.032738	0.04248	0.041442	0.024514	0.020092	0.019201	0.021463
1.36667	0.0441601	0.038627	0.047933	0.046362	0.027267	0.021543	0.021816	0.023943
1.48333	0.0512791	0.045739	0.052718	0.054599	0.031017	0.022992	0.022552	0.02426
1.6	0.0574993	0.052795	0.057219	0.057314	0.035304	0.024634	0.024385	0.025651
1.71667	0.0694635	0.063813	0.073036	0.073498	0.039244	0.025971	0.025501	0.027717
1.83333	0.0836466	0.068718	0.08345	0.082381	0.044049	0.027421	0.026757	0.028301
1.95	0.0930227	0.084938	0.091243	0.088374	0.04753	0.029248	0.027726	0.028976
2.06667	0.0935211	0.090313	0.1037	0.100528	0.052712	0.031249	0.029102	0.030504
2.18333	0.106712	0.101677	0.120711	0.111239	0.05728	0.033511	0.029767	0.0321
2.3	0.119073	0.11577	0.12432	0.112296	0.059118	0.035216	0.030802	0.033588
2.41667	0.137605	0.127562	0.136406	0.128494	0.065102	0.036992	0.033338	0.03415
2.53333	0.14707	0.139996	0.151833	0.14179	0.077984	0.03944	0.034021	0.036036
2.65	0.154832	0.161843	0.165192	0.1587	0.075304	0.041678	0.035055	0.037417
2.76667	0.168943	0.16554	0.171077	0.162283	0.088308	0.042696	0.035176	0.037774
2.88333	0.187913	0.181125	0.185009	0.169937	0.097747	0.044681	0.036326	0.038602
3	0.198291	0.197561	0.202522	0.186385	0.099988	0.046253	0.03875	0.040049
3.11667	0.216152	0.216435	0.217618	0.199103	0.102561	0.046021	0.039787	0.041222
3.23333	0.235322	0.223115	0.236141	0.212014	0.108516	0.052933	0.041408	0.043066
3.35	0.246769	0.240514	0.246645	0.22313	0.115463	0.050286	0.041925	0.042558
3.46667	0.263315	0.249048	0.251136	0.231419	0.130298	0.056092	0.043095	0.045613
3.58333	0.280066	0.269752	0.278387	0.247877	0.134756	0.057453	0.04389	0.045694
3.7	0.287914	0.286398	0.29428	0.261158	0.14429	0.055846	0.043892	0.045527
3.81667	0.296959	0.31223	0.29475	0.268692	0.139813	0.058953	0.046613	0.04632
3.93333	0.317426	0.318469	0.320148	0.282423	0.157925	0.058658	0.047429	0.047571
4.05	0.32948	0.334096	0.324877	0.300551	0.167889	0.06598	0.046836	0.048671
4.16667	0.350534	0.353981	0.350641	0.313173	0.174374	0.068445	0.045605	0.047677
4.28333	0.358474	0.378492	0.356827	0.319814	0.178899	0.064136	0.047972	0.048071
4.4	0.373723	0.379118	0.37924	0.332233	0.183284	0.069826	0.050236	0.047402
4.51667	0.403115	0.395528	0.398447	0.350013	0.189912	0.070942	0.048033	0.051965
4.63333	0.413243	0.400684	0.398474	0.373105	0.197016	0.07314	0.052631	0.052778
4.75	0.415073	0.421056	0.414224	0.383578	0.210606	0.073022	0.053389	0.048672
4.86667	0.43254	0.446273	0.422356	0.386796	0.217385	0.083117	0.053248	0.05282
4.98333	0.436887	0.454912	0.443049	0.400797	0.221365	0.075775	0.055782	0.058559
5.1	0.454989	0.464703	0.451794	0.410038	0.231769	0.087532	0.051358	0.053555
5.21667	0.473079	0.483296	0.469282	0.429399	0.249567	0.080241	0.058473	0.054289
5.33333	0.491836	0.49582	0.488724	0.434937	0.262973	0.087571	0.053351	0.057085
5.45	0.489138	0.51258	0.486647	0.441658	0.266467	0.086522	0.058093	0.058328
5.56667	0.522913	0.528053	0.507958	0.461661	0.271303	0.089252	0.063158	0.057597
5.68333	0.522848	0.532516	0.504046	0.47509	0.275705	0.087964	0.060335	0.060511
5.8	0.526223	0.550658	0.52585	0.471251	0.287656	0.092781	0.057491	0.054924
5.91667	0.55138	0.557597	0.532825	0.521161	0.288605	0.094969	0.059908	0.059649
6.03333	0.559709	0.581418	0.555283	0.510336	0.292029	0.092392	0.060219	0.058373
6.15	0.565346	0.582974	0.571364	0.545285	0.315034	0.091817	0.062349	0.062787
6.26667	0.58843	0.590994	0.55409	0.553251	0.313622	0.092183	0.056358	0.061331
6.38333	0.598206	0.594704	0.591343	0.546779	0.329633	0.095952	0.064788	0.065574
6.5	0.594277	0.619784	0.578719	0.567922	0.336	0.103764	0.062306	0.062345
6.61667	0.621997	0.636817	0.602382	0.561062	0.346046	0.104156	0.063525	0.06498
6.73333	0.61182	0.642287	0.611706	0.573128	0.353025	0.099681	0.062567	0.065256
6.85	0.624621	0.664669	0.633274	0.577254	0.352341	0.101424	0.060103	0.064275
6.96667	0.642359	0.655032	0.624606	0.598158	0.368113	0.102941	0.06766	0.069055
7.08333	0.666703	0.672304	0.64475	0.597233	0.36406	0.101357	0.063747	0.060969
7.2	0.664177	0.679041	0.654862	0.60952	0.370733	0.102994	0.06807	0.065341
7.31666	0.670224	0.68379	0.661648	0.602508	0.393505	0.105812	0.067889	0.063674
7.43333	0.685236	0.689708	0.677504	0.631165	0.383358	0.110806	0.064327	0.068179
7.55	0.708507	0.71636	0.684313	0.637739	0.392461	0.109372	0.067465	0.066334
7.66666	0.698681	0.71679	0.671444	0.648935	0.40993	0.10667	0.06952	0.06514
7.78333	0.71694	0.734404	0.702302	0.650304	0.431443	0.111819	0.073274	0.067513
7.9	0.712272	0.736619	0.697286	0.661667	0.425176	0.114966	0.068418	0.068986
8.01666	0.721272	0.734087	0.695789	0.661448	0.442989	0.108549	0.065334	0.065337
8.13333	0.737316	0.737617	0.727599	0.682177	0.447026	0.120026	0.069367	0.069712
8.25	0.738065	0.768439	0.728728	0.68335	0.452741	0.118109	0.074411	0.072343
8.36666	0.743802	0.74606	0.716083	0.697542	0.455739	0.11677	0.069339	0.07267
8.48333	0.757907	0.776085	0.741081	0.70171	0.450954	0.116655	0.073016	0.07073
8.6	0.751265	0.786937	0.755611	0.692747	0.476048	0.122446	0.073743	0.069696
8.71666	0.786836	0.797729	0.761843	0.719222	0.477107	0.124774	0.074917	0.069916
8.83333	0.77557	0.788143	0.780795	0.71292	0.48123	0.127786	0.072214	0.072049
8.95	0.789422	0.801521	0.772038	0.717051	0.480218	0.13388	0.074364	0.068402
9.06666	0.805992	0.787982	0.788469	0.761024	0.486039	0.125006	0.072878	0.06877
9.18333	0.766984	0.798753	0.7681	0.74529	0.493832	0.132982	0.079674	0.072479
9.3	0.802533	0.801496	0.78553	0.756908	0.500687	0.125622	0.073454	0.075118
9.41666	0.783047	0.824262	0.783758	0.749636	0.495293	0.130034	0.073723	0.070568
9.53333	0.804703	0.822696	0.804559	0.756452	0.521465	0.129608	0.075986	0.075986
9.65	0.81513	0.8251	0.825266	0.751693	0.519089	0.138441	0.079507	0.07633
9.76666	0.8267	0.828583	0.81117	0.760302	0.519668	0.131182	0.076896	0.075035
9.88333	0.818154	0.851354	0.82684	0.752353	0.522259	0.138896	0.075075	0.073799
10	0.862173	0.843163	0.825541	0.77296	0.540991	0.144176	0.076108	0.074496
10.1167	0.839836	0.848398	0.815978	0.787371	0.548422	0.134139	0.079095	0.077517
10.2333	0.833086	0.86643	0.823702	0.79317	0.534481	0.13792	0.073419	0.07498
10.35	0.854174	0.851444	0.850265	0.793656	0.559032	0.149604	0.083468	0.079168
10.4667	0.85865	0.852042	0.85268	0.802127	0.548861	0.139651	0.082077	0.071855
10.5833	0.866589	0.863702	0.84747	0.804977	0.546788	0.150191	0.076158	0.078192
10.7	0.856725	0.887719	0.849799	0.80415	0.557799	0.144902	0.081581	0.076826
10.8167	0.864604	0.86085	0.851783	0.795958	0.583705	0.154679	0.078484	0.078503
10.9333	0.881689	0.86634	0.84325	0.806915	0.577201	0.145805	0.078349	0.071635
11.05	0.879171	0.875732	0.8516	0.811041	0.577316	0.149166	0.082228	0.075945
11.1667	0.867477	0.882527	0.858556	0.821291	0.58475	0.149994	0.082613	0.077227
11.2833	0.907029	0.875377	0.851872	0.819625	0.584856	0.149513	0.086575	0.077007
11.4	0.881636	0.904074	0.873904	0.833726	0.591569	0.153276	0.078916	0.078057
11.5167	0.890704	0.900674	0.873841	0.825202	0.608921	0.156547	0.081325	0.072583
11.6333	0.898907	0.900607	0.856476	0.828867	0.606788	0.14865	0.080661	0.077211
11.75	0.899224	0.900168	0.873545	0.827223	0.598274	0.149779	0.081126	0.075505
11.8667	0.890083	0.909385	0.893173	0.829869	0.61213	0.160359	0.081565	0.077818
11.9833	0.914114	0.909382	0.868466	0.854129	0.61684	0.149827	0.083451	0.075317
12.1	0.899763	0.940757	0.884796	0.849711	0.61414	0.156596	0.087248	0.080466
12.2167	0.920549	0.917466	0.902866	0.842312	0.636315	0.153383	0.085616	0.081644
12.3333	0.894909	0.915	0.891811	0.869338	0.627468	0.162417	0.081756	0.080907
12.45	0.922694	0.904868	0.88694	0.862027	0.637981	0.165234	0.084883	0.082009
12.5667	0.929366	0.92428	0.901005	0.843542	0.630363	0.16792	0.084737	0.081248
12.6833	0.915876	0.916142	0.897083	0.852318	0.638556	0.164087	0.085213	0.08299
12.8	0.929413	0.926468	0.895849	0.847236	0.644249	0.162902	0.0919	0.07961
12.9167	0.91451	0.916101	0.92163	0.864653	0.649511	0.17516	0.08199	0.080895
13.0333	0.9317	0.942557	0.920609	0.853164	0.628457	0.170399	0.088994	0.081114
13.15	0.914912	0.927897	0.911928	0.862236	0.65684	0.179233	0.08487	0.084872
13.2667	0.927138	0.923325	0.937947	0.85129	0.642285	0.173065	0.089522	0.07874
13.3833	0.945688	0.943108	0.90402	0.862382	0.664019	0.172393	0.085294	0.083279
13.5	0.927419	0.938373	0.93965	0.899327	0.64394	0.171539	0.086889	0.082046
13.6167	0.923979	0.955974	0.939755	0.898927	0.645277	0.174608	0.088193	0.078223
13.7333	0.95088	0.965042	0.939093	0.867333	0.662315	0.174815	0.089777	0.075635
13.85	0.955474	0.950599	0.938528	0.886008	0.670197	0.166879	0.087962	0.083155
13.9667	0.928329	0.937002	0.931472	0.900594	0.672153	0.175357	0.084964	0.087283
14.0833	0.951526	0.923402	0.906012	0.889409	0.660861	0.176459	0.08686	0.082131
14.2	0.934077	0.936732	0.934609	0.872023	0.697563	0.175742	0.082851	0.079664
14.3167	0.946509	0.952764	0.948856	0.876248	0.691798	0.17106	0.088271	0.084724
14.4333	0.927753	0.954473	0.912646	0.917061	0.682588	0.179299	0.092181	0.080388
14.55	0.94906	0.948056	0.91894	0.868975	0.675335	0.184335	0.090467	0.081536
14.6667	0.940844	0.951735	0.908339	0.898003	0.704813	0.178169	0.092242	0.084907
14.7833	0.955996	0.947854	0.923034	0.894133	0.694017	0.183537	0.086335	0.077371
14.9	0.967658	0.961205	0.918481	0.888223	0.691507	0.187247	0.091571	0.082986
15.0167	0.93725	0.938928	0.914504	0.890737	0.686684	0.191331	0.087946	0.08501
15.1333	0.952451	0.96134	0.927912	0.886457	0.704005	0.18375	0.087069	0.082444
15.25	0.964611	0.956466	0.928722	0.880671	0.695116	0.181523	0.094925	0.078757
15.3667	0.944071	0.937778	0.956461	0.891216	0.709004	0.197094	0.0892	0.082279
15.4833	0.978538	0.943237	0.933182	0.885405	0.705181	0.19208	0.089281	0.08079
15.6	0.990413	0.95137	0.967885	0.902282	0.714353	0.192745	0.089689	0.080106
15.7167	0.969773	0.9644	0.942163	0.895891	0.723851	0.186559	0.087468	0.080191
15.8333	0.946058	0.944524	0.929092	0.897386	0.718728	0.197034	0.094013	0.081457
15.95	0.984071	0.943108	0.960146	0.887797	0.708441	0.194585	0.09168	0.080767
16.0667	0.943553	0.957458	0.927151	0.865888	0.703256	0.201222	0.08885	0.084773
16.1833	0.958676	0.997394	0.91573	0.914846	0.716611	0.204381	0.093794	0.090914
16.3	0.9554	0.964949	0.918517	0.901751	0.709159	0.20603	0.094258	0.095278
16.4167	0.972018	0.944482	0.959717	0.908219	0.707269	0.199875	0.094908	0.082567
16.5333	0.957711	0.921318	0.930637	0.924823	0.715685	0.207512	0.089047	0.087966
16.65	0.977374	0.968035	0.945929	0.901004	0.705975	0.206046	0.092973	0.088706
16.7667	0.986326	0.949999	0.9212	0.907139	0.737994	0.19834	0.091173	0.087022
16.8833	0.955687	0.9422	0.939282	0.917772	0.732941	0.198751	0.09023	0.085494
17	0.969999	0.966343	0.92571	0.901183	0.717609	0.205295	0.088311	0.086823
17.1167	0.974066	0.943334	0.950738	0.912333	0.701444	0.212039	0.091836	0.088453
17.2333	0.975555	0.979955	0.964127	0.912214	0.705223	0.207523	0.088062	0.085803
17.35	0.987141	0.942946	0.95679	0.900901	0.732378	0.21385	0.091969	0.08036
17.4667	0.97073	0.938766	0.942988	0.928375	0.743973	0.206393	0.095481	0.085583
17.5833	0.954769	0.958399	0.943035	0.899092	0.715271	0.212874	0.089896	0.087706
17.7	0.972082	0.980533	0.948363	0.890883	0.722081	0.212919	0.091564	0.083775
17.8167	0.954512	0.990936	0.942341	0.891324	0.717511	0.216819	0.094187	0.086708
17.9333	0.968243	0.964044	0.936773	0.902468	0.714543	0.223039	0.09613	0.084332
18.05	0.984388	0.963607	0.956552	0.912556	0.72311	0.216495	0.091052	0.085388
18.1667	0.959287	0.960835	0.943711	0.917107	0.728768	0.21936	0.09387	0.084971
18.2833	1	0.974276	0.936755	0.907857	0.731926	0.214973	0.094295	0.084257
18.4	0.947898	0.971047	0.947915	0.908576	0.727395	0.226494	0.088341	0.091848
18.5167	0.944716	0.959151	0.92751	0.907592	0.753133	0.225974	0.08993	0.084764
18.6333	0.992559	0.948139	0.951059	0.893936	0.734184	0.224601	0.08997	0.087664
18.75	0.966095	0.966096	0.942117	0.915955	0.730224	0.218884	0.091693	0.081903
18.8667	0.964291	0.929644	0.927006	0.904457	0.729333	0.223769	0.091876	0.087259
18.9833	0.965308	0.96216	0.978631	0.927738	0.713349	0.223889	0.095124	0.087437
19.1	0.967962	0.952054	0.946472	0.897334	0.716482	0.22474	0.09317	0.082637
19.2167	0.976862	0.960067	0.954065	0.932359	0.751737	0.232083	0.093402	0.084707
19.3333	0.975713	0.978281	0.970284	0.900054	0.718451	0.227302	0.093267	0.084775
19.45	0.977262	0.980378	0.934399	0.929396	0.737599	0.231937	0.095305	0.080356
19.5667	0.99698	0.954284	0.978299	0.902267	0.723973	0.2324	0.095758	0.082246
19.6833	0.960449	0.97705	0.949992	0.909558	0.731311	0.232922	0.094135	0.080378
19.8	0.972969	0.940387	0.962475	0.898734	0.745097	0.227898	0.095566	0.081283
19.9167	0.962259	0.970301	0.961174	0.907679	0.746636	0.233174	0.091129	0.08352
20.0333	0.998345	0.964179	0.936977	0.892906	0.73589	0.235834	0.098105	0.087427
20.15	0.961991	0.95691	0.957229	0.892407	0.726731	0.223452	0.092991	0.091216
20.2667	0.962593	0.949368	0.962137	0.910103	0.746388	0.223348	0.091621	0.086365
20.3833	0.980353	0.951568	0.938168	0.909558	0.738135	0.234545	0.095951	0.086373
20.5	0.98588	0.949809	0.930887	0.913435	0.749436	0.246902	0.094253	0.088271
20.6167	0.971565	0.96	0.952944	0.901519	0.740588	0.24594	0.093002	0.085267
20.7333	0.977979	0.96391	0.972599	0.893221	0.732145	0.251205	0.097584	0.081061
20.85	0.97322	0.937967	0.957181	0.877329	0.73026	0.253499	0.098827	0.082044
20.9667	0.959341	0.951065	0.967856	0.867394	0.732157	0.250745	0.089025	0.083675
21.0833	0.990485	0.960785	0.933913	0.899161	0.730539	0.248707	0.095188	0.086125
21.2	0.943382	0.930855	0.928115	0.902838	0.761987	0.255679	0.095447	0.080924
21.3167	0.963232	0.943064	0.932864	0.918431	0.75088	0.247207	0.092505	0.083433
21.4333	0.971726	0.93961	0.933378	0.89396	0.715987	0.249217	0.093048	0.084825
21.55	0.953295	0.924338	0.970993	0.91862	0.744	0.263929	0.09552	0.085875
21.6667	0.955765	0.971647	0.935676	0.915239	0.771041	0.256714	0.093497	0.084574
21.7833	0.981214	0.944071	0.930989	0.895836	0.754958	0.262044	0.091896	0.082926
21.9	0.973362	0.929152	0.917995	0.891494	0.772819	0.258252	0.092823	0.082711
22.0167	0.946508	0.944218	0.953331	0.921294	0.75076	0.266388	0.095017	0.083653
22.1333	0.968015	0.966079	0.933217	0.885993	0.730225	0.261818	0.092501	0.0822
22.25	0.975469	0.946387	0.928071	0.891991	0.755665	0.272187	0.097587	0.084446
22.3667	0.971751	0.970607	0.950026	0.914579	0.750125	0.265685	0.095597	0.087021
22.4833	0.940204	0.93949	0.927466	0.916116	0.761106	0.274627	0.097637	0.084428
22.6	0.972035	0.964613	0.959882	0.892827	0.761632	0.275608	0.094289	0.08712
22.7167	0.959678	0.930185	0.929118	0.895674	0.769217	0.276916	0.094302	0.085601
22.8333	0.961655	0.950409	0.936393	0.90104	0.755471	0.270072	0.09264	0.086994
22.95	0.949657	0.938797	0.934141	0.887569	0.752305	0.277136	0.092608	0.080205
23.0667	0.973486	0.953457	0.944609	0.931403	0.757698	0.272622	0.098052	0.08687
23.1833	0.978358	0.951934	0.930265	0.894706	0.750181	0.266976	0.094276	0.087702
23.3	0.950842	0.940096	0.91974	0.897998	0.75024	0.273403	0.090237	0.084876
23.4167	0.976552	0.955529	0.914677	0.880739	0.74133	0.265829	0.094816	0.083002
23.5333	0.943904	0.938569	0.937627	0.924224	0.753767	0.283715	0.094038	0.084911
23.65	0.964723	0.933454	0.91524	0.887196	0.76044	0.280202	0.096254	0.089153
23.7667	0.963954	0.931531	0.932708	0.894791	0.750844	0.286912	0.090258	0.086168
23.8833	0.983598	0.917972	0.917004	0.913382	0.757243	0.285031	0.092555	0.084225
24	0.960841	0.932875	0.950821	0.876792	0.766585	0.28839	0.095727	0.089119
24.1167	0.953385	0.961517	0.921917	0.891249	0.772284	0.28951	0.088213	0.086178
24.2333	0.950373	0.92353	0.923535	0.884821	0.753692	0.288508	0.092798	0.086192
24.35	0.965894	0.943527	0.933053	0.89366	0.749917	0.286791	0.092603	0.085281
24.4667	0.940072	0.914102	0.92753	0.886352	0.754909	0.292854	0.097664	0.082952
24.5833	0.955906	0.942363	0.938778	0.901333	0.767857	0.286944	0.098134	0.082966
24.7	0.954844	0.921684	0.902819	0.873962	0.748908	0.297269	0.093596	0.08587
24.8167	0.959184	0.914058	0.947154	0.888414	0.76349	0.280613	0.095962	0.089105
24.9333	0.960826	0.920333	0.913962	0.89528	0.779347	0.298378	0.091807	0.086447
25.05	0.936767	0.914027	0.909705	0.887804	0.766674	0.292576	0.098859	0.089008
25.1667	0.944615	0.916006	0.901976	0.899111	0.755051	0.303588	0.093838	0.081629
25.2833	0.976246	0.926328	0.929919	0.89135	0.764929	0.296423	0.096462	0.089586
25.4	0.953104	0.919084	0.911893	0.888688	0.724726	0.291758	0.092889	0.078901
25.5167	0.936459	0.903651	0.913087	0.895703	0.75702	0.290984	0.099883	0.080621
25.6333	0.942066	0.905953	0.901105	0.890572	0.741461	0.29643	0.094984	0.084579
25.75	0.928107	0.922774	0.919699	0.90471	0.745252	0.305953	0.098559	0.081696
25.8667	0.920644	0.947182	0.928102	0.869827	0.761079	0.310088	0.097231	0.080368
25.9833	0.964334	0.907656	0.918341	0.900659	0.753541	0.304188	0.102636	0.085647
26.1	0.93923	0.898036	0.918611	0.888745	0.772793	0.3083	0.097565	0.084714
26.2167	0.923079	0.931902	0.929501	0.868708	0.743742	0.30279	0.09359	0.082941
26.3333	0.937411	0.924884	0.916631	0.91071	0.752612	0.306271	0.100038	0.087049
26.45	0.931232	0.900476	0.928274	0.889796	0.748695	0.310345	0.094669	0.080045
26.5667	0.941058	0.911086	0.903137	0.880942	0.764339	0.312574	0.088535	0.076868
26.6833	0.946861	0.909153	0.921707	0.88959	0.747309	0.309428	0.091705	0.078096
26.8	0.950482	0.913017	0.91753	0.89859	0.748824	0.312348	0.089502	0.079355
26.9167	0.916963	0.904819	0.914713	0.860886	0.755015	0.31999	0.10109	0.085214
27.0333	0.953712	0.912684	0.901781	0.879983	0.747415	0.319866	0.091514	0.080618
27.15	0.930987	0.921779	0.925867	0.894737	0.749849	0.321014	0.094626	0.082466
27.2667	0.954625	0.915357	0.896682	0.888453	0.766068	0.3217	0.09171	0.076425
27.3833	0.955085	0.916921	0.923844	0.892911	0.743601	0.319992	0.091778	0.082111
27.5	0.942963	0.90535	0.895898	0.915674	0.777983	0.319531	0.094288	0.085303
27.6167	0.938658	0.896319	0.896766	0.873706	0.7464	0.334035	0.091843	0.087678
27.7333	0.926435	0.901707	0.891196	0.856963	0.759933	0.327186	0.094392	0.086805
27.85	0.953663	0.908284	0.871846	0.869737	0.756969	0.324375	0.091796	0.083207
27.9667	0.949052	0.894258	0.894026	0.852195	0.744898	0.329629	0.096254	0.082827
28.0833	0.948854	0.900589	0.891148	0.865228	0.752134	0.327849	0.096308	0.082068
28.2	0.921418	0.905049	0.907189	0.872165	0.757207	0.339836	0.094423	0.07742
28.3167	0.922114	0.889312	0.903561	0.862004	0.7651	0.330808	0.098218	0.082136
28.4333	0.940472	0.886629	0.903467	0.882547	0.760998	0.338553	0.098744	0.080294
28.55	0.957797	0.891152	0.904458	0.881043	0.751878	0.337937	0.099937	0.084122
28.6667	0.902418	0.884012	0.887554	0.872032	0.748049	0.333642	0.096764	0.080876
28.7833	0.940306	0.89513	0.890258	0.866219	0.776796	0.335873	0.097064	0.083653
28.9	0.931296	0.892964	0.887164	0.868668	0.764577	0.334464	0.096999	0.079626
29.0167	0.943525	0.883034	0.893603	0.866078	0.762688	0.329915	0.098501	0.083436
29.1333	0.936288	0.900559	0.882437	0.848177	0.74881	0.346372	0.096574	0.082101
29.25	0.915197	0.901425	0.905351	0.877819	0.753609	0.3451	0.097208	0.081722
29.3667	0.917456	0.888425	0.89683	0.869905	0.767435	0.344561	0.096709	0.08499
29.4833	0.914916	0.889366	0.911466	0.870359	0.738775	0.343202	0.093413	0.084779
29.6	0.926064	0.900252	0.897262	0.868222	0.750512	0.349933	0.095971	0.080871
29.7167	0.925374	0.889552	0.873604	0.844849	0.759367	0.350374	0.09472	0.081142
29.8333	0.91522	0.8748	0.911669	0.851562	0.755855	0.350169	0.093855	0.081356
29.95	0.898881	0.870717	0.872484	0.845211	0.75064	0.344331	0.095705	0.082386
30.0667	0.923517	0.891441	0.87667	0.8488	0.747786	0.353169	0.094513	0.081466
30.1833	0.914565	0.868997	0.876323	0.856062	0.760462	0.361841	0.092839	0.08128
30.3	0.913983	0.89197	0.888872	0.87243	0.749324	0.347463	0.104678	0.083291
30.4167	0.919111	0.90865	0.877618	0.8798	0.749348	0.34662	0.094063	0.07964
30.5333	0.905886	0.884185	0.879616	0.855179	0.756233	0.363931	0.091624	0.084143

## Sheet: DLDD primary data n1
val (nM)	0	0.32	1	3.2	10	32	100	316
time (min)
0	0.0009066	0.0014	0.00069	0.000641	0.001084	0.000995	0.000903	0.001043
0.533333	0.0059068	0.006816	0.005626	0.005541	0.005651	0.006369	0.005909	0.006021
0.65	0.0067556	0.007922	0.008775	0.007916	0.006649	0.008014	0.007817	0.007189
0.766666	0.0097791	0.011384	0.009911	0.008655	0.00827	0.009397	0.009782	0.008519
0.883333	0.012131	0.014179	0.012779	0.011932	0.010357	0.011044	0.01009	0.01058
1	0.0146231	0.017429	0.014713	0.013322	0.011832	0.011951	0.011217	0.01139
1.11667	0.0177524	0.02038	0.017375	0.015141	0.014113	0.013752	0.012076	0.01252
1.23333	0.0214586	0.023686	0.021481	0.018553	0.016933	0.015562	0.013549	0.013464
1.35	0.0262952	0.028781	0.025996	0.020355	0.019026	0.018083	0.015071	0.014393
1.46667	0.0317002	0.033366	0.031765	0.025774	0.021397	0.018354	0.014953	0.014964
1.58333	0.0342809	0.041188	0.033654	0.028381	0.025595	0.021521	0.015982	0.016537
1.7	0.0410192	0.048072	0.039696	0.032174	0.028236	0.022365	0.018549	0.017686
1.81667	0.044675	0.053961	0.043542	0.036055	0.030069	0.025016	0.019187	0.017981
1.93333	0.0508831	0.060369	0.050291	0.039907	0.034954	0.026624	0.019102	0.019941
2.05	0.0563127	0.067597	0.054422	0.044734	0.036758	0.028071	0.019986	0.020328
2.16667	0.0641039	0.076461	0.06206	0.049553	0.040738	0.029674	0.021825	0.020664
2.28333	0.0703367	0.085567	0.068558	0.054817	0.042535	0.032474	0.021789	0.021521
2.4	0.077882	0.095504	0.076106	0.060074	0.04889	0.033455	0.022793	0.022377
2.51667	0.0868947	0.10161	0.080518	0.066488	0.053288	0.03479	0.023509	0.023363
2.63333	0.0897522	0.109671	0.088255	0.06892	0.05642	0.037828	0.02323	0.024208
2.75	0.100489	0.122949	0.094283	0.076205	0.061721	0.041268	0.024408	0.023991
2.86667	0.10301	0.130609	0.101849	0.080037	0.064163	0.041215	0.027079	0.024952
2.98333	0.117719	0.134412	0.110431	0.086486	0.069613	0.04496	0.026861	0.026443
3.1	0.121552	0.150138	0.118034	0.093371	0.076173	0.046809	0.027766	0.02742
3.21667	0.130081	0.16015	0.121439	0.096486	0.080982	0.047999	0.028412	0.029492
3.33333	0.138218	0.172441	0.129666	0.105936	0.085314	0.050566	0.027912	0.029821
3.45	0.15506	0.184058	0.144667	0.11017	0.091867	0.053375	0.028572	0.031025
3.56667	0.14985	0.191355	0.139009	0.115902	0.094715	0.054215	0.028641	0.030405
3.68333	0.158282	0.186818	0.160058	0.121306	0.101	0.056259	0.031093	0.031244
3.8	0.178825	0.211733	0.153878	0.128889	0.102786	0.058236	0.030284	0.031892
3.91667	0.192239	0.217323	0.163864	0.137476	0.108767	0.061855	0.032453	0.03203
4.03333	0.19234	0.23137	0.171591	0.133685	0.112255	0.063837	0.034027	0.033973
4.15	0.189552	0.23971	0.189042	0.15272	0.118858	0.065489	0.033936	0.032687
4.26667	0.197474	0.244301	0.197321	0.155212	0.123682	0.069372	0.035985	0.03554
4.38333	0.219426	0.263788	0.211022	0.160246	0.125107	0.069378	0.033719	0.033689
4.5	0.241665	0.281124	0.204667	0.159439	0.133163	0.073772	0.034794	0.035914
4.61667	0.226793	0.28584	0.221296	0.175739	0.14414	0.075056	0.036149	0.036106
4.73333	0.238599	0.297329	0.213898	0.182685	0.146522	0.076352	0.036924	0.03626
4.85	0.253242	0.315971	0.22439	0.185963	0.136597	0.079814	0.036431	0.037431
4.96667	0.268763	0.320883	0.245555	0.198057	0.156322	0.081022	0.038259	0.03775
5.08333	0.259776	0.333167	0.250685	0.186877	0.15127	0.083051	0.037703	0.038416
5.2	0.268836	0.353776	0.265535	0.205232	0.157642	0.084768	0.039014	0.038161
5.31667	0.287063	0.362452	0.273107	0.207841	0.160681	0.087354	0.038404	0.040014
5.43333	0.296135	0.368698	0.279412	0.218814	0.172253	0.087383	0.04141	0.040821
5.55	0.302267	0.385117	0.274418	0.225716	0.175684	0.090838	0.039191	0.041152
5.66667	0.312096	0.392063	0.286827	0.234544	0.165205	0.090575	0.041553	0.041303
5.78333	0.309159	0.402269	0.311754	0.233145	0.186954	0.094323	0.041357	0.040696
5.9	0.305894	0.389433	0.314754	0.236487	0.194393	0.095888	0.04231	0.040108
6.01667	0.353937	0.447735	0.305122	0.245163	0.188796	0.099927	0.041377	0.043895
6.13333	0.341555	0.441391	0.336143	0.257448	0.198449	0.096883	0.042214	0.041159
6.25	0.352396	0.451273	0.334993	0.267828	0.206571	0.099033	0.042578	0.042671
6.36667	0.363353	0.451044	0.343516	0.263457	0.21664	0.10302	0.042955	0.044445
6.48333	0.37507	0.456215	0.350484	0.275665	0.208044	0.104074	0.042913	0.044291
6.6	0.388864	0.478169	0.361075	0.280751	0.225518	0.106498	0.045772	0.045078
6.71667	0.39042	0.491814	0.356765	0.272421	0.227443	0.104808	0.046462	0.045188
6.83333	0.383662	0.480878	0.363812	0.294399	0.225118	0.111111	0.044674	0.048
6.95	0.400125	0.508603	0.375437	0.291737	0.240048	0.113388	0.046173	0.047796
7.06667	0.412545	0.519864	0.369105	0.302286	0.242034	0.116087	0.046462	0.04624
7.18333	0.424434	0.523784	0.392102	0.314626	0.246239	0.118088	0.04798	0.047063
7.3	0.42111	0.530084	0.39115	0.321749	0.265433	0.119016	0.049398	0.050717
7.41666	0.437296	0.554909	0.411904	0.320544	0.245105	0.120723	0.049946	0.047534
7.53333	0.417522	0.545363	0.418777	0.318143	0.253874	0.124489	0.048536	0.049553
7.65	0.444214	0.572309	0.40577	0.329193	0.262973	0.127699	0.050828	0.049
7.76666	0.441423	0.556157	0.410383	0.327152	0.274323	0.128355	0.048659	0.048938
7.88333	0.477514	0.584345	0.437939	0.332957	0.290447	0.133703	0.05023	0.050112
8	0.447928	0.579086	0.431222	0.322547	0.281145	0.131965	0.050155	0.050082
8.11666	0.483725	0.589476	0.442243	0.337773	0.283284	0.133152	0.051239	0.051796
8.23333	0.473504	0.60688	0.451821	0.352091	0.282488	0.139168	0.050054	0.051
8.35	0.481055	0.608296	0.455035	0.360877	0.283889	0.132213	0.050145	0.051125
8.46666	0.504413	0.583855	0.46942	0.364017	0.281936	0.139944	0.051221	0.052112
8.58333	0.480027	0.615423	0.465014	0.378324	0.291235	0.144605	0.050854	0.053095
8.7	0.497122	0.647147	0.468403	0.36997	0.297397	0.130802	0.052328	0.053253
8.81666	0.513673	0.640881	0.482198	0.377225	0.286887	0.143373	0.052894	0.051895
8.93333	0.513557	0.648047	0.486603	0.389795	0.28562	0.152492	0.053966	0.053263
9.05	0.492693	0.640092	0.49106	0.39285	0.308707	0.148738	0.054497	0.054844
9.16666	0.523957	0.653076	0.497261	0.415263	0.304291	0.141993	0.053181	0.053359
9.28333	0.532597	0.68839	0.515803	0.411814	0.307497	0.148631	0.053764	0.053988
9.4	0.544358	0.669718	0.507295	0.424088	0.327601	0.15507	0.054941	0.054367
9.51666	0.540952	0.701805	0.513739	0.400831	0.324023	0.140528	0.055864	0.055714
9.63333	0.522469	0.668384	0.533435	0.407892	0.328219	0.160949	0.055771	0.055003
9.75	0.546398	0.708218	0.54184	0.420076	0.33198	0.163382	0.056616	0.056479
9.86666	0.548818	0.690883	0.5244	0.420612	0.324196	0.157176	0.055231	0.058507
9.98333	0.545571	0.704383	0.538458	0.439536	0.355958	0.156813	0.05655	0.057064
10.1	0.579436	0.703414	0.550948	0.448878	0.342889	0.164841	0.056662	0.056829
10.2167	0.572799	0.740259	0.540958	0.44634	0.353883	0.171921	0.057339	0.058521
10.3333	0.583503	0.721055	0.556262	0.435675	0.337313	0.160925	0.059908	0.05799
10.45	0.595597	0.760741	0.572624	0.430383	0.352642	0.166521	0.058105	0.059056
10.5667	0.58705	0.736244	0.568254	0.461615	0.348078	0.161214	0.056597	0.059619
10.6833	0.591145	0.723544	0.553591	0.43979	0.363886	0.177611	0.05764	0.060344
10.8	0.600189	0.74576	0.558679	0.452343	0.372873	0.173932	0.059884	0.058847
10.9167	0.598492	0.738809	0.550978	0.454862	0.354318	0.162686	0.05716	0.060727
11.0333	0.575879	0.750027	0.573756	0.45917	0.356756	0.174051	0.057992	0.059741
11.15	0.610195	0.773262	0.568428	0.472012	0.361217	0.170653	0.060331	0.061221
11.2667	0.621508	0.778585	0.585718	0.447597	0.362523	0.17407	0.059859	0.062445
11.3833	0.624821	0.775042	0.587797	0.46794	0.370207	0.185893	0.061253	0.059634
11.5	0.607752	0.781694	0.609574	0.477645	0.378914	0.169332	0.059713	0.059559
11.6167	0.6232	0.778884	0.592076	0.500202	0.377099	0.1691	0.061005	0.061491
11.7333	0.616023	0.776394	0.587161	0.483612	0.388479	0.177189	0.062251	0.063208
11.85	0.624753	0.771283	0.598918	0.479532	0.389283	0.184696	0.062314	0.063908
11.9667	0.631162	0.788889	0.620575	0.482048	0.368595	0.192287	0.060829	0.063068
12.0833	0.619972	0.80289	0.606837	0.477757	0.391829	0.183385	0.062817	0.063753
12.2	0.628554	0.800738	0.615027	0.494903	0.379	0.1875	0.063051	0.06328
12.3167	0.637798	0.812449	0.587507	0.511519	0.394816	0.192266	0.063929	0.065714
12.4333	0.652298	0.813515	0.637965	0.507481	0.387749	0.189766	0.064035	0.066193
12.55	0.640124	0.828558	0.624032	0.498991	0.422901	0.197711	0.065279	0.063008
12.6667	0.65404	0.807565	0.645038	0.515652	0.404808	0.188949	0.063541	0.063919
12.7833	0.659205	0.827005	0.623913	0.518956	0.404489	0.189044	0.064452	0.064151
12.9	0.653862	0.832114	0.624291	0.498894	0.407582	0.205613	0.064103	0.064653
13.0167	0.690642	0.832806	0.62409	0.521443	0.393299	0.184688	0.067239	0.064662
13.1333	0.629819	0.825175	0.651965	0.514332	0.400905	0.200329	0.06351	0.065589
13.25	0.685189	0.856679	0.631489	0.549981	0.405788	0.197362	0.06594	0.066814
13.3667	0.669318	0.841562	0.643346	0.542723	0.414353	0.190468	0.064837	0.065799
13.4833	0.698294	0.853297	0.663925	0.52023	0.408421	0.207028	0.066801	0.067247
13.6	0.681881	0.828074	0.630118	0.538589	0.432044	0.20584	0.067934	0.068159
13.7167	0.690173	0.861088	0.662	0.530608	0.413929	0.208233	0.065856	0.068016
13.8333	0.690359	0.85713	0.650652	0.525699	0.410288	0.207744	0.067913	0.067583
13.95	0.700821	0.856807	0.662636	0.544537	0.413965	0.217871	0.068212	0.069973
14.0667	0.686859	0.885389	0.678036	0.531953	0.41765	0.213907	0.066333	0.069781
14.1833	0.679975	0.856714	0.677117	0.545105	0.429417	0.212414	0.067651	0.069537
14.3	0.697399	0.87102	0.665588	0.544102	0.438518	0.226594	0.068882	0.067001
14.4167	0.674774	0.875071	0.661024	0.531904	0.427893	0.203391	0.069837	0.06965
14.5333	0.678842	0.892844	0.651369	0.548842	0.438239	0.212602	0.067587	0.06884
14.65	0.680584	0.874698	0.682938	0.546462	0.434274	0.218363	0.069653	0.069552
14.7667	0.730455	0.881681	0.658679	0.550962	0.435226	0.221417	0.070531	0.069467
14.8833	0.702507	0.892606	0.669647	0.532884	0.430614	0.219995	0.068808	0.069968
15	0.692405	0.884268	0.676825	0.540898	0.41963	0.223188	0.07167	0.067944
15.1167	0.702873	0.877952	0.650132	0.544046	0.416527	0.213021	0.071183	0.072147
15.2333	0.6931	0.882463	0.674367	0.559894	0.441666	0.210124	0.070971	0.069727
15.35	0.71382	0.865225	0.666716	0.57435	0.445164	0.230248	0.07253	0.069766
15.4667	0.692913	0.886276	0.671692	0.538846	0.416479	0.236976	0.069986	0.070195
15.5833	0.710534	0.889171	0.68657	0.557494	0.463114	0.236432	0.073328	0.072031
15.7	0.703026	0.868516	0.684191	0.539005	0.446253	0.218993	0.071658	0.072799
15.8167	0.711065	0.887183	0.685755	0.562125	0.429772	0.224404	0.073985	0.072757
15.9333	0.707848	0.896884	0.6785	0.573341	0.435743	0.226056	0.073032	0.069948
16.05	0.719529	0.90358	0.706266	0.565082	0.459168	0.233353	0.07199	0.072096
16.1667	0.732605	0.876983	0.694865	0.594587	0.454675	0.225754	0.071969	0.070595
16.2833	0.70796	0.866338	0.681607	0.569432	0.438739	0.22426	0.072701	0.074232
16.4	0.727214	0.886094	0.682626	0.560787	0.443756	0.23	0.071543	0.073853
16.5167	0.723502	0.88514	0.694379	0.554383	0.469431	0.234709	0.072916	0.072868
16.6333	0.72316	0.903099	0.702187	0.562632	0.45343	0.246811	0.072076	0.07332
16.75	0.719897	0.871453	0.690255	0.582885	0.457498	0.233685	0.073567	0.070802
16.8667	0.724133	0.880563	0.701654	0.570564	0.451027	0.239611	0.075557	0.072583
16.9833	0.727511	0.92002	0.695552	0.569603	0.463766	0.243195	0.074008	0.07377
17.1	0.718782	0.914456	0.699029	0.592118	0.453242	0.234691	0.073087	0.073385
17.2167	0.719067	0.922645	0.703119	0.607144	0.464835	0.249392	0.074608	0.074763
17.3333	0.71599	0.880961	0.723341	0.572553	0.44905	0.243099	0.076015	0.075165
17.45	0.711058	0.894863	0.683305	0.600148	0.455644	0.239773	0.073528	0.074758
17.5667	0.710723	0.87893	0.718041	0.57853	0.46539	0.240275	0.075086	0.075253
17.6833	0.76141	0.896262	0.711005	0.591279	0.466282	0.247226	0.077167	0.076705
17.8	0.720653	0.91083	0.704215	0.57477	0.455013	0.243165	0.074362	0.075771
17.9167	0.726371	0.903024	0.727614	0.600008	0.470828	0.242763	0.074183	0.07307
18.0333	0.723127	0.905077	0.71308	0.592043	0.454177	0.238561	0.075535	0.074915
18.15	0.729253	0.920771	0.707715	0.606766	0.470208	0.244902	0.077373	0.077044
18.2667	0.711538	0.869561	0.711804	0.579738	0.483414	0.250904	0.076522	0.07513
18.3833	0.724831	0.898975	0.701763	0.581959	0.469526	0.25207	0.074899	0.073781
18.5	0.745819	0.924579	0.726684	0.602419	0.466029	0.259158	0.074619	0.076549
18.6167	0.730403	0.904056	0.715017	0.586809	0.476215	0.245194	0.075464	0.078375
18.7333	0.71378	0.927318	0.707767	0.588668	0.46345	0.251518	0.074943	0.076215
18.85	0.750881	0.921518	0.71876	0.60679	0.472071	0.257502	0.078012	0.079436
18.9667	0.741098	0.924416	0.724561	0.591791	0.48484	0.247637	0.077041	0.077203
19.0833	0.747668	0.925471	0.737793	0.59371	0.463078	0.25876	0.077635	0.076017
19.2	0.713072	0.918354	0.725357	0.597282	0.457371	0.242843	0.078682	0.077486
19.3167	0.746448	0.925889	0.740011	0.616057	0.470004	0.250885	0.076531	0.077797
19.4333	0.733039	0.923218	0.714653	0.62396	0.47702	0.27056	0.075895	0.077697
19.55	0.755843	0.945425	0.731338	0.585294	0.464495	0.246225	0.078969	0.076792
19.6667	0.761151	0.91585	0.712258	0.596704	0.482508	0.263957	0.078574	0.080017
19.7833	0.753372	0.920323	0.707059	0.609907	0.469717	0.256303	0.077959	0.076807
19.9	0.742553	0.905289	0.732667	0.628237	0.464882	0.264612	0.077272	0.077515
20.0167	0.720654	0.919937	0.721582	0.60049	0.490512	0.255408	0.077202	0.077685
20.1333	0.759726	0.921156	0.742822	0.614956	0.494239	0.276457	0.079026	0.077867
20.25	0.753727	0.929978	0.729167	0.634476	0.475721	0.263116	0.079236	0.077544
20.3667	0.750655	0.910281	0.754928	0.644663	0.503269	0.265576	0.079354	0.078224
20.4833	0.764074	0.927484	0.744226	0.623091	0.495952	0.26272	0.0806	0.078278
20.6	0.751007	0.923889	0.741262	0.629693	0.503129	0.257787	0.077054	0.077923
20.7167	0.760754	0.921638	0.738826	0.607425	0.483007	0.265356	0.078119	0.0786
20.8333	0.750692	0.921048	0.735263	0.599751	0.47629	0.261878	0.079405	0.079361
20.95	0.736907	0.913103	0.747893	0.614098	0.492831	0.268595	0.079513	0.077645
21.0667	0.757864	0.893849	0.737417	0.628061	0.494679	0.266839	0.080004	0.078798
21.1833	0.776176	0.941386	0.736364	0.634965	0.481137	0.282192	0.081158	0.080353
21.3	0.760472	0.920718	0.749329	0.616311	0.496785	0.27414	0.081107	0.079549
21.4167	0.755725	0.926865	0.771096	0.636756	0.487958	0.276809	0.07967	0.08075
21.5333	0.727196	0.930075	0.741691	0.631573	0.485544	0.256423	0.080008	0.081872
21.65	0.731954	0.925543	0.759907	0.635444	0.498608	0.26768	0.080945	0.079427
21.7667	0.75422	0.899555	0.752025	0.607285	0.488985	0.277157	0.080921	0.079357
21.8833	0.742054	0.930955	0.745661	0.643032	0.501247	0.268173	0.082867	0.080509
22	0.740162	0.938416	0.749373	0.646685	0.490289	0.281753	0.081746	0.081225
22.1167	0.767186	0.933657	0.763399	0.622391	0.51442	0.279259	0.083109	0.082331
22.2333	0.764992	0.940562	0.752023	0.620656	0.498008	0.274265	0.081878	0.081247
22.35	0.783596	0.936768	0.755234	0.615549	0.478645	0.278088	0.08133	0.07834
22.4667	0.776838	0.90697	0.744193	0.62859	0.508503	0.280952	0.081108	0.0781
22.5833	0.773369	0.919935	0.763947	0.62573	0.500751	0.28664	0.085286	0.083311
22.7	0.767481	0.910473	0.737033	0.630955	0.485161	0.28953	0.083257	0.079603
22.8167	0.767858	0.943605	0.754639	0.622808	0.495195	0.300805	0.083562	0.081936
22.9333	0.756662	0.922401	0.770257	0.606019	0.490101	0.297233	0.082904	0.079903
23.05	0.773174	0.937908	0.774185	0.646083	0.493008	0.275562	0.080273	0.081115
23.1667	0.751858	0.94154	0.766491	0.629601	0.509621	0.294478	0.086053	0.08363
23.2833	0.787643	0.925979	0.756822	0.631214	0.506149	0.284324	0.083651	0.08165
23.4	0.778911	0.920273	0.76866	0.644194	0.49587	0.283036	0.083436	0.080982
23.5167	0.75298	0.935792	0.757741	0.621753	0.49366	0.286817	0.084777	0.08308
23.6333	0.779401	0.952685	0.723323	0.615893	0.50497	0.280285	0.083091	0.082234
23.75	0.742322	0.934933	0.762618	0.638542	0.515068	0.297974	0.082241	0.08294
23.8667	0.768974	0.936432	0.79402	0.642882	0.523659	0.288647	0.084249	0.080792
23.9833	0.742141	0.916131	0.756593	0.626307	0.517021	0.284782	0.084722	0.08227
24.1	0.76172	0.949196	0.773942	0.641058	0.511497	0.289064	0.084807	0.081647
24.2167	0.755988	0.948603	0.787257	0.642476	0.477972	0.298174	0.081642	0.084115
24.3333	0.754817	0.95566	0.760187	0.633246	0.508826	0.304876	0.082466	0.084725
24.45	0.764728	0.962878	0.778383	0.6498	0.541979	0.285265	0.083106	0.082243
24.5667	0.751512	0.940476	0.735002	0.65811	0.498403	0.295864	0.084977	0.082571
24.6833	0.775288	0.960731	0.758506	0.64109	0.480398	0.296774	0.084505	0.084875
24.8	0.774561	0.946863	0.774899	0.66022	0.504616	0.299575	0.08472	0.081626
24.9167	0.755707	0.949919	0.757587	0.655767	0.499654	0.301377	0.085815	0.082657
25.0333	0.751711	0.93048	0.747578	0.650972	0.500351	0.304574	0.083774	0.082855
25.15	0.770102	0.964612	0.749939	0.671757	0.495892	0.309627	0.084705	0.082827
25.2667	0.770898	0.922792	0.77148	0.663938	0.512162	0.303141	0.087158	0.083061
25.3833	0.770594	0.952545	0.774113	0.665325	0.50369	0.289954	0.088325	0.086
25.5	0.787519	0.945769	0.76581	0.658385	0.514407	0.305946	0.086283	0.083899
25.6167	0.780833	0.937869	0.780951	0.641695	0.514742	0.316067	0.085319	0.083906
25.7333	0.764768	0.964163	0.770809	0.651187	0.516004	0.303617	0.087484	0.083651
25.85	0.783116	0.976809	0.753738	0.658722	0.493593	0.302545	0.087333	0.085874
25.9667	0.772742	0.96176	0.765815	0.690818	0.510865	0.298254	0.088158	0.08388
26.0833	0.781586	0.937368	0.787927	0.666985	0.500531	0.302622	0.085892	0.084523
26.2	0.773657	0.94724	0.780239	0.685602	0.496002	0.301023	0.085195	0.08432
26.3167	0.769465	0.953239	0.771832	0.669774	0.51459	0.321012	0.084909	0.084111
26.4333	0.755617	0.95463	0.787763	0.647031	0.498285	0.328235	0.086409	0.086842
26.55	0.762575	0.95948	0.787338	0.652496	0.516012	0.302861	0.087897	0.084491
26.6667	0.792992	0.944881	0.777529	0.666631	0.498446	0.302376	0.086139	0.08516
26.7833	0.769255	0.946482	0.776736	0.643979	0.510643	0.299585	0.087587	0.087147
26.9	0.789014	0.921569	0.751799	0.653007	0.524942	0.324495	0.087173	0.085292
27.0167	0.736347	0.941564	0.777602	0.679852	0.51903	0.309117	0.089479	0.084844
27.1333	0.768604	0.937587	0.782809	0.649663	0.511136	0.310641	0.08643	0.085714
27.25	0.750847	0.939345	0.78212	0.64568	0.519248	0.309782	0.08728	0.083288
27.3667	0.771992	0.965631	0.76812	0.659815	0.50388	0.324938	0.088438	0.085864
27.4833	0.768678	0.958037	0.779497	0.660217	0.510312	0.32983	0.088854	0.083254
27.6	0.757507	0.959106	0.762834	0.656275	0.503564	0.320208	0.089388	0.086021
27.7167	0.788452	0.971414	0.768333	0.656707	0.500728	0.305671	0.087511	0.084384
27.8333	0.772083	0.96018	0.786886	0.667185	0.510124	0.322648	0.091512	0.086202
27.95	0.745357	0.949028	0.784384	0.651729	0.511872	0.322077	0.088997	0.086224
28.0667	0.761333	0.954284	0.758538	0.64691	0.510471	0.319506	0.086715	0.086937
28.1833	0.784836	0.953862	0.795576	0.645207	0.52144	0.306612	0.088472	0.084291
28.3	0.807201	0.934446	0.775762	0.666518	0.511312	0.304402	0.089798	0.084096
28.4167	0.781965	0.96062	0.796039	0.654488	0.528913	0.338564	0.088601	0.085812
28.5333	0.774781	0.960452	0.782314	0.666893	0.520282	0.323414	0.091159	0.087088
28.65	0.787135	0.950363	0.766087	0.657927	0.493166	0.329091	0.088586	0.08633
28.7667	0.746154	0.984213	0.789422	0.662063	0.496903	0.310076	0.087799	0.084596
28.8833	0.777394	0.961029	0.783694	0.670903	0.509849	0.32484	0.087604	0.085278
29	0.785664	0.976538	0.781937	0.665825	0.527767	0.327757	0.090074	0.087441
29.1167	0.803093	0.994023	0.794141	0.669899	0.531247	0.321549	0.088436	0.085713
29.2333	0.77353	0.961009	0.782439	0.680971	0.497989	0.31947	0.090961	0.087806
29.35	0.801382	0.965246	0.811765	0.658397	0.491689	0.318074	0.090296	0.085393
29.4667	0.7811	0.943254	0.775929	0.651676	0.502579	0.335899	0.089766	0.08708
29.5833	0.798046	0.951278	0.769454	0.648451	0.516037	0.340891	0.089953	0.085686
29.7	0.777567	0.975321	0.800261	0.665049	0.529328	0.33731	0.092396	0.087949
29.8167	0.795716	0.952796	0.799511	0.652934	0.521912	0.338289	0.090787	0.086766
29.9333	0.793914	1	0.786039	0.665123	0.498351	0.336908	0.088948	0.088045
30.05	0.78776	0.962889	0.799758	0.672323	0.501086	0.345204	0.091977	0.088377
30.1667	0.813024	0.954192	0.785413	0.65225	0.524427	0.306379	0.088623	0.087308
30.2833	0.775839	0.956615	0.798784	0.654507	0.52141	0.332144	0.091702	0.088329
30.4	0.776786	0.975408	0.807586	0.673061	0.527854	0.317452	0.090352	0.088281
30.5167	0.77283	0.94321	0.766323	0.660443	0.499645	0.316334	0.090051	0.087801

## Sheet: DLDD primary data n2
val (nM)	0	0.32	1	3.2	10	32	100	316
time (min)
0	0.00162519	0.00148	0.001413	0.001359	0.001529	0.001548	0.001425	0.001673
0.533333	0.011508	0.011485	0.011201	0.010617	0.0101	0.010926	0.011268	0.01059
0.65	0.0131058	0.013411	0.013635	0.013166	0.012836	0.011997	0.01291	0.012411
0.766666	0.0166868	0.017189	0.015957	0.016514	0.014067	0.013977	0.014363	0.013965
0.883333	0.0196872	0.019954	0.018598	0.019241	0.015873	0.014693	0.016141	0.015186
1	0.0230826	0.023956	0.022477	0.022451	0.016845	0.017158	0.018075	0.016822
1.11667	0.0268235	0.029788	0.026617	0.026065	0.017651	0.018765	0.018951	0.018455
1.23333	0.03158	0.034063	0.0315	0.030075	0.020238	0.01926	0.020918	0.01961
1.35	0.0388699	0.03806	0.037645	0.035416	0.022062	0.021279	0.020914	0.020565
1.46667	0.0430653	0.043908	0.042365	0.041635	0.022471	0.022532	0.021688	0.022587
1.58333	0.0496162	0.051136	0.049348	0.045651	0.026048	0.024725	0.024535	0.023971
1.7	0.0565432	0.060001	0.057573	0.054099	0.02634	0.024789	0.025815	0.02483
1.81667	0.0652593	0.065033	0.063593	0.05955	0.027457	0.025691	0.026949	0.026516
1.93333	0.0725483	0.075107	0.067967	0.065167	0.030239	0.027304	0.028174	0.025962
2.05	0.0816295	0.082323	0.078028	0.069607	0.031664	0.029906	0.028752	0.027233
2.16667	0.0827987	0.08976	0.085636	0.077498	0.032926	0.031054	0.030449	0.029311
2.28333	0.098408	0.100413	0.091462	0.080768	0.033266	0.030405	0.032532	0.029742
2.4	0.103945	0.105114	0.104046	0.095112	0.034577	0.032994	0.032025	0.030868
2.51667	0.116519	0.116943	0.110322	0.094267	0.037484	0.035077	0.03299	0.032105
2.63333	0.124348	0.128662	0.122168	0.113374	0.039838	0.035122	0.034359	0.034033
2.75	0.137909	0.123834	0.129398	0.115606	0.040768	0.036594	0.036029	0.033694
2.86667	0.146891	0.139739	0.137627	0.117789	0.042789	0.038074	0.036265	0.035395
2.98333	0.14662	0.153007	0.150357	0.133655	0.043768	0.039148	0.038144	0.036438
3.1	0.156966	0.169822	0.161248	0.141712	0.045369	0.041276	0.038556	0.036901
3.21667	0.172883	0.176834	0.170855	0.151819	0.048279	0.040835	0.040647	0.03621
3.33333	0.190078	0.18468	0.173463	0.160033	0.048299	0.043042	0.040503	0.039423
3.45	0.199451	0.200387	0.186934	0.174483	0.050262	0.043615	0.042686	0.038386
3.56667	0.210454	0.214514	0.208192	0.169486	0.053086	0.045879	0.042042	0.040619
3.68333	0.222336	0.218293	0.216474	0.175039	0.053311	0.046849	0.044735	0.042036
3.8	0.231856	0.231796	0.230558	0.195706	0.055694	0.047345	0.043919	0.04209
3.91667	0.24016	0.239873	0.232138	0.19821	0.05647	0.049601	0.0462	0.042584
4.03333	0.245519	0.257713	0.247731	0.216528	0.059743	0.050268	0.046678	0.043494
4.15	0.267533	0.259208	0.251946	0.217212	0.060464	0.051714	0.048127	0.044337
4.26667	0.275212	0.269214	0.279282	0.236675	0.060077	0.052094	0.048094	0.045619
4.38333	0.282625	0.284205	0.280972	0.235731	0.062019	0.05232	0.049154	0.045577
4.5	0.314113	0.294067	0.291787	0.255424	0.063685	0.055013	0.050487	0.045772
4.61667	0.312888	0.313301	0.288911	0.25403	0.066401	0.054849	0.051264	0.047616
4.73333	0.331366	0.323619	0.318634	0.263636	0.068928	0.0572	0.053193	0.049167
4.85	0.322085	0.326617	0.328048	0.268717	0.070065	0.054844	0.053606	0.049043
4.96667	0.342682	0.327858	0.336945	0.288446	0.072392	0.058258	0.05294	0.048397
5.08333	0.36639	0.348684	0.341845	0.279733	0.071754	0.058187	0.053634	0.050251
5.2	0.367247	0.364593	0.35931	0.298576	0.07241	0.060325	0.054989	0.050039
5.31667	0.383119	0.37974	0.364802	0.309282	0.075499	0.058936	0.055086	0.051936
5.43333	0.394817	0.391122	0.369999	0.326977	0.077817	0.060729	0.055741	0.050323
5.55	0.395171	0.395378	0.377533	0.335837	0.076597	0.063697	0.057879	0.051783
5.66667	0.407948	0.415285	0.413107	0.343	0.081094	0.064856	0.057511	0.05115
5.78333	0.413465	0.428336	0.414415	0.349627	0.081429	0.063072	0.058745	0.052502
5.9	0.421038	0.428794	0.421085	0.341757	0.080814	0.066349	0.060446	0.053167
6.01667	0.454908	0.446489	0.432532	0.36269	0.079723	0.065367	0.060006	0.05411
6.13333	0.458123	0.445891	0.457158	0.370144	0.085936	0.0679	0.059768	0.055868
6.25	0.478438	0.476811	0.45647	0.359277	0.08738	0.069264	0.060917	0.05623
6.36667	0.477466	0.480918	0.469448	0.394429	0.088319	0.068522	0.060301	0.055672
6.48333	0.473567	0.481969	0.487111	0.398313	0.0931	0.069626	0.063242	0.057862
6.6	0.496383	0.496878	0.484692	0.39635	0.091839	0.06974	0.062407	0.056307
6.71667	0.496939	0.51008	0.483628	0.398744	0.094975	0.070659	0.063495	0.057927
6.83333	0.519857	0.52656	0.5064	0.422126	0.094279	0.07219	0.064991	0.057288
6.95	0.538333	0.52272	0.51278	0.4274	0.091436	0.072501	0.063753	0.057542
7.06667	0.528324	0.542349	0.533849	0.427545	0.099728	0.071323	0.065281	0.057873
7.18333	0.547576	0.537683	0.541774	0.444724	0.104691	0.072616	0.065506	0.059656
7.3	0.542626	0.565885	0.542862	0.446061	0.104319	0.076332	0.065487	0.061308
7.41666	0.57148	0.565298	0.559172	0.455845	0.101806	0.074534	0.066641	0.060388
7.53333	0.581887	0.575947	0.564614	0.483407	0.104975	0.077732	0.067374	0.060389
7.65	0.597186	0.573499	0.594206	0.456353	0.102746	0.078739	0.068307	0.060645
7.76666	0.594632	0.611062	0.597864	0.479457	0.106069	0.07704	0.068328	0.063876
7.88333	0.61644	0.617221	0.587416	0.483848	0.104888	0.077842	0.069606	0.063682
8	0.6257	0.608836	0.610116	0.513585	0.103989	0.079854	0.07079	0.062907
8.11666	0.639108	0.611247	0.620183	0.492597	0.11615	0.079687	0.069691	0.062401
8.23333	0.635678	0.615557	0.618163	0.492263	0.108051	0.079564	0.070087	0.061625
8.35	0.643735	0.629362	0.641414	0.501695	0.117076	0.078876	0.07039	0.06359
8.46666	0.664831	0.652593	0.646691	0.533534	0.111915	0.080996	0.071516	0.06546
8.58333	0.664844	0.667691	0.665003	0.525198	0.1198	0.083167	0.072702	0.064316
8.7	0.673444	0.660324	0.645917	0.532446	0.125203	0.079276	0.074492	0.065567
8.81666	0.676275	0.672388	0.666585	0.543315	0.115931	0.080246	0.07461	0.06539
8.93333	0.690353	0.681204	0.645731	0.553314	0.116007	0.090501	0.073357	0.065639
9.05	0.701001	0.678592	0.686483	0.565102	0.126872	0.082438	0.074425	0.066695
9.16666	0.701373	0.707182	0.682784	0.562586	0.113323	0.085632	0.074373	0.066373
9.28333	0.714865	0.693486	0.680655	0.561432	0.12046	0.089712	0.074145	0.067547
9.4	0.722177	0.715441	0.686931	0.565913	0.120904	0.084948	0.076096	0.06646
9.51666	0.722816	0.71321	0.706248	0.585399	0.123333	0.089135	0.076359	0.067194
9.63333	0.71827	0.72543	0.708698	0.585932	0.121443	0.082361	0.076021	0.066904
9.75	0.725701	0.717942	0.722916	0.597282	0.133452	0.090494	0.076809	0.068139
9.86666	0.740445	0.751204	0.730496	0.603479	0.127027	0.086609	0.076565	0.069092
9.98333	0.757526	0.738631	0.755156	0.588738	0.125716	0.088452	0.075095	0.069756
10.1	0.762126	0.744555	0.727961	0.598695	0.129646	0.090296	0.077143	0.068977
10.2167	0.764139	0.726398	0.735054	0.617064	0.136711	0.086505	0.077057	0.067505
10.3333	0.767116	0.771009	0.764888	0.625882	0.133608	0.083078	0.07718	0.067473
10.45	0.776786	0.767478	0.752146	0.611923	0.130715	0.093646	0.079972	0.069169
10.5667	0.7907	0.790978	0.754718	0.631509	0.132236	0.087919	0.078011	0.069511
10.6833	0.790058	0.776781	0.783937	0.622215	0.137543	0.091216	0.078765	0.070014
10.8	0.792373	0.769155	0.787049	0.634412	0.147633	0.088806	0.080154	0.069549
10.9167	0.790595	0.786593	0.789972	0.633865	0.146194	0.089129	0.08229	0.071648
11.0333	0.803187	0.791752	0.788027	0.642503	0.137044	0.098782	0.079441	0.071243
11.15	0.807775	0.799188	0.775454	0.647327	0.146122	0.093439	0.080354	0.073659
11.2667	0.802328	0.797679	0.804623	0.629979	0.142639	0.098538	0.081322	0.071085
11.3833	0.81284	0.822055	0.794482	0.656028	0.142687	0.088365	0.078968	0.073225
11.5	0.83667	0.833768	0.803721	0.670621	0.138458	0.090077	0.080163	0.072327
11.6167	0.83677	0.803272	0.801643	0.693456	0.148359	0.097956	0.084839	0.071823
11.7333	0.832477	0.797434	0.817703	0.673707	0.14721	0.096703	0.081547	0.071603
11.85	0.846179	0.805304	0.829888	0.677011	0.142739	0.093663	0.081031	0.073055
11.9667	0.826461	0.803385	0.819668	0.657648	0.142964	0.090878	0.08258	0.072953
12.0833	0.839368	0.823546	0.823717	0.677709	0.146989	0.093081	0.080744	0.07492
12.2	0.862659	0.83833	0.837614	0.694458	0.146531	0.087879	0.081025	0.072913
12.3167	0.829665	0.842768	0.836326	0.698803	0.154256	0.092845	0.082748	0.072539
12.4333	0.867186	0.85848	0.854371	0.689536	0.157043	0.09724	0.081048	0.074398
12.55	0.876383	0.837659	0.869257	0.691857	0.160718	0.105214	0.084226	0.074467
12.6667	0.884701	0.876627	0.831915	0.723162	0.152545	0.095512	0.084831	0.073669
12.7833	0.898125	0.853954	0.866889	0.693743	0.146522	0.098136	0.08321	0.074711
12.9	0.865255	0.880814	0.851263	0.700811	0.153432	0.097073	0.083107	0.075496
13.0167	0.889265	0.872874	0.875177	0.715699	0.16329	0.098863	0.085554	0.075047
13.1333	0.895692	0.870015	0.854842	0.687121	0.153637	0.093546	0.082082	0.075809
13.25	0.89622	0.869844	0.854997	0.715408	0.168457	0.103223	0.08286	0.075284
13.3667	0.87771	0.857334	0.87701	0.715491	0.157928	0.103716	0.084931	0.074797
13.4833	0.866563	0.902324	0.861645	0.732657	0.167277	0.105778	0.086737	0.076025
13.6	0.889002	0.877571	0.871023	0.714663	0.169575	0.098659	0.086341	0.07418
13.7167	0.912456	0.885626	0.870245	0.706269	0.157512	0.105323	0.086119	0.075207
13.8333	0.900139	0.860098	0.883303	0.725865	0.164726	0.097579	0.083172	0.074868
13.95	0.89521	0.875036	0.873469	0.723775	0.165376	0.105638	0.084806	0.075763
14.0667	0.910433	0.884286	0.874124	0.728728	0.165059	0.102625	0.091333	0.077387
14.1833	0.91178	0.885668	0.865754	0.727258	0.17017	0.10543	0.082441	0.076909
14.3	0.924717	0.87634	0.916021	0.749407	0.171398	0.104551	0.087696	0.07715
14.4167	0.918783	0.882115	0.928447	0.752782	0.174628	0.105577	0.082404	0.077669
14.5333	0.912371	0.879468	0.905156	0.732638	0.168017	0.107171	0.089847	0.076643
14.65	0.914728	0.900985	0.885153	0.757729	0.180881	0.104215	0.079145	0.076868
14.7667	0.904037	0.89378	0.896689	0.736524	0.174187	0.105063	0.086311	0.079511
14.8833	0.910078	0.868081	0.893352	0.7504	0.168177	0.100633	0.083629	0.077707
15	0.919522	0.891761	0.886163	0.741774	0.181257	0.100651	0.093587	0.077047
15.1167	0.922248	0.895898	0.896337	0.774398	0.185468	0.100814	0.086008	0.07786
15.2333	0.938459	0.898488	0.912979	0.770271	0.174595	0.101829	0.087632	0.077016
15.35	0.928173	0.919136	0.899685	0.742201	0.178274	0.102292	0.093535	0.078207
15.4667	0.920377	0.896475	0.91312	0.762142	0.175057	0.105906	0.087491	0.079145
15.5833	0.952186	0.921938	0.918359	0.757302	0.175443	0.107048	0.089317	0.076798
15.7	0.944052	0.905445	0.91933	0.770039	0.176095	0.100996	0.090193	0.077286
15.8167	0.92836	0.928955	0.904287	0.766215	0.181606	0.113427	0.092387	0.079135
15.9333	0.902601	0.925293	0.949962	0.763785	0.186845	0.111164	0.095475	0.081086
16.05	0.936342	0.918609	0.895911	0.758384	0.18816	0.103154	0.095637	0.078545
16.1667	0.957765	0.924778	0.919501	0.744606	0.173787	0.10293	0.09046	0.080182
16.2833	0.948539	0.894332	0.915381	0.744976	0.196824	0.114006	0.097476	0.079449
16.4	0.935057	0.916608	0.91035	0.747674	0.185436	0.107607	0.087944	0.079198
16.5167	0.938743	0.920043	0.926517	0.753643	0.183492	0.106996	0.079684	0.077947
16.6333	0.962911	0.920036	0.933777	0.780908	0.189632	0.110462	0.087139	0.079297
16.75	0.94584	0.924202	0.913063	0.763837	0.184071	0.10958	0.093087	0.079951
16.8667	0.948536	0.948928	0.928512	0.787575	0.185729	0.10075	0.088656	0.08012
16.9833	0.943692	0.921418	0.918323	0.76857	0.188649	0.099909	0.088797	0.083833
17.1	0.932967	0.910946	0.937847	0.776935	0.189196	0.113197	0.087253	0.081264
17.2167	0.937769	0.917787	0.920811	0.764505	0.188076	0.111797	0.084152	0.080596
17.3333	0.922945	0.949947	0.931055	0.771411	0.191318	0.107843	0.093201	0.080024
17.45	0.946548	0.967118	0.922441	0.776544	0.18195	0.120266	0.08892	0.077617
17.5667	0.945326	0.925468	0.91889	0.757903	0.184279	0.11053	0.093163	0.080561
17.6833	0.962571	0.931616	0.932307	0.775335	0.190527	0.116393	0.092201	0.078818
17.8	0.962331	0.929455	0.918363	0.770203	0.205817	0.10478	0.09074	0.079542
17.9167	0.924529	0.941611	0.944659	0.760938	0.192105	0.105812	0.090877	0.079372
18.0333	0.963352	0.951149	0.903647	0.783559	0.200363	0.114387	0.091433	0.080839
18.15	0.954697	0.957163	0.938375	0.762634	0.188364	0.114294	0.091141	0.087209
18.2667	0.958355	0.924276	0.943469	0.782462	0.189532	0.111906	0.09184	0.082054
18.3833	0.958222	0.935506	0.929742	0.774534	0.194279	0.110152	0.095614	0.079953
18.5	0.935744	0.945609	0.914746	0.788567	0.206469	0.112518	0.091948	0.079823
18.6167	0.964456	0.93353	0.939741	0.773474	0.202461	0.111982	0.092259	0.08218
18.7333	0.957189	0.95	0.938075	0.805753	0.191219	0.103036	0.093861	0.078515
18.85	0.920494	0.917827	0.928435	0.797592	0.203324	0.109279	0.095573	0.081491
18.9667	0.976216	0.937519	0.924025	0.794303	0.201628	0.108846	0.088568	0.081954
19.0833	0.967441	0.938522	0.948324	0.78161	0.204774	0.111174	0.088274	0.083132
19.2	0.972459	0.927053	0.919098	0.762281	0.204002	0.111964	0.09638	0.085273
19.3167	0.972669	0.970646	0.926234	0.811184	0.201891	0.108676	0.099302	0.080891
19.4333	0.975383	0.944428	0.938127	0.773886	0.201499	0.109533	0.091304	0.083205
19.55	0.993767	0.918644	0.93983	0.793937	0.208821	0.11362	0.089527	0.080232
19.6667	0.967871	0.925232	0.951409	0.795617	0.203337	0.113499	0.095991	0.079642
19.7833	0.963619	0.927402	0.938533	0.782701	0.201136	0.120452	0.095813	0.08207
19.9	0.967401	0.939086	0.934207	0.801677	0.212884	0.113459	0.088557	0.083911
20.0167	0.973323	0.949856	0.926641	0.809316	0.200537	0.105208	0.093658	0.082922
20.1333	0.940651	0.944152	0.934882	0.803778	0.213197	0.116914	0.09928	0.082234
20.25	0.945292	0.93374	0.936266	0.814209	0.214451	0.111095	0.093247	0.0805
20.3667	0.953404	0.946348	0.948143	0.816234	0.209315	0.122181	0.099037	0.080121
20.4833	0.961857	0.925621	0.905117	0.795799	0.221367	0.11341	0.091092	0.079263
20.6	0.942874	0.932798	0.95129	0.802306	0.197046	0.108891	0.093666	0.081053
20.7167	0.957162	0.950475	0.961461	0.793289	0.205354	0.115522	0.097005	0.080098
20.8333	0.970804	0.92902	0.910951	0.791899	0.221931	0.112312	0.093304	0.082077
20.95	0.943562	0.952923	0.940297	0.790939	0.214124	0.120138	0.093042	0.081149
21.0667	0.963934	0.947955	0.942701	0.778414	0.21534	0.110667	0.099006	0.080232
21.1833	0.939577	0.940825	0.949737	0.799324	0.215358	0.115317	0.092173	0.080851
21.3	0.972919	0.930906	0.93959	0.795267	0.220763	0.128027	0.093004	0.084313
21.4167	0.950476	0.924479	0.947946	0.787358	0.216504	0.11514	0.093155	0.083084
21.5333	0.998148	0.934909	0.944649	0.796222	0.213785	0.115899	0.09791	0.085048
21.65	0.962094	0.922115	0.931388	0.784988	0.218915	0.119779	0.094055	0.075945
21.7667	0.963437	0.939648	0.937803	0.788441	0.217104	0.117308	0.088157	0.082848
21.8833	0.959315	0.920203	0.93664	0.796704	0.216383	0.114674	0.097222	0.08398
22	0.965007	0.930275	0.949237	0.790181	0.222193	0.120388	0.094586	0.08092
22.1167	0.96446	0.911198	0.96182	0.805836	0.219821	0.11828	0.092047	0.081686
22.2333	0.96911	0.946715	0.930169	0.775076	0.217187	0.115533	0.095024	0.083599
22.35	0.955604	0.959645	0.919062	0.792412	0.223976	0.115806	0.091825	0.08276
22.4667	0.956926	0.941339	0.941389	0.798062	0.218595	0.119161	0.087204	0.081242
22.5833	0.948286	0.961998	0.905229	0.785213	0.217213	0.11068	0.097761	0.082082
22.7	0.977225	0.917607	0.939109	0.798513	0.225822	0.110188	0.09736	0.084114
22.8167	0.953929	0.929067	0.920304	0.783675	0.225909	0.12004	0.091332	0.080278
22.9333	0.978484	0.927356	0.933101	0.784284	0.232332	0.122773	0.093576	0.078966
23.05	0.96201	0.928415	0.948723	0.820502	0.222667	0.11945	0.094503	0.080024
23.1667	1	0.925825	0.935841	0.816221	0.230143	0.121659	0.09862	0.083278
23.2833	0.964383	0.95448	0.943705	0.786159	0.227864	0.118558	0.093778	0.083533
23.4	0.97822	0.939381	0.924277	0.797217	0.225558	0.117258	0.093219	0.081347
23.5167	0.96362	0.940412	0.926067	0.809778	0.237478	0.114283	0.09709	0.08212
23.6333	0.940298	0.931793	0.9398	0.791225	0.220358	0.119851	0.09327	0.082856
23.75	0.956686	0.929749	0.912841	0.798476	0.228744	0.110777	0.096578	0.086298
23.8667	0.951525	0.909021	0.94838	0.787666	0.224407	0.116624	0.095361	0.083972
23.9833	0.968083	0.933098	0.930253	0.804942	0.234036	0.11754	0.096185	0.086315
24.1	0.944503	0.920104	0.929804	0.79619	0.237096	0.121092	0.09065	0.083662
24.2167	0.960024	0.92397	0.946037	0.813783	0.232788	0.11322	0.096284	0.084718
24.3333	0.94205	0.911362	0.924208	0.797163	0.240839	0.118355	0.106784	0.086033
24.45	0.946252	0.940409	0.940468	0.802383	0.225679	0.111387	0.095942	0.082556
24.5667	0.983025	0.956263	0.962745	0.78825	0.231469	0.117397	0.085323	0.07997
24.6833	0.960437	0.908919	0.940907	0.807328	0.238429	0.119741	0.096825	0.083313
24.8	0.938926	0.937548	0.923862	0.801354	0.242719	0.119213	0.092838	0.080688
24.9167	0.951479	0.927882	0.939888	0.802042	0.239302	0.120091	0.091565	0.083957
25.0333	0.95121	0.955809	0.928229	0.81216	0.229284	0.123088	0.094427	0.080321
25.15	0.943124	0.899885	0.91176	0.804192	0.247652	0.118497	0.094444	0.081557
25.2667	0.956155	0.914225	0.938616	0.802018	0.234535	0.111338	0.092393	0.082828
25.3833	0.964971	0.926476	0.920543	0.78495	0.237739	0.120888	0.090833	0.085373
25.5	0.937912	0.911014	0.911546	0.802278	0.22858	0.117923	0.091439	0.081513
25.6167	0.928731	0.904228	0.926397	0.792579	0.237928	0.110461	0.101018	0.086869
25.7333	0.96552	0.944741	0.930728	0.782592	0.235814	0.124168	0.100134	0.082685
25.85	0.952395	0.936946	0.908023	0.796382	0.236585	0.123655	0.091789	0.082262
25.9667	0.928383	0.910959	0.891553	0.807512	0.236726	0.116056	0.09541	0.077976
26.0833	0.922885	0.912513	0.919518	0.800176	0.24037	0.12307	0.094655	0.084233
26.2	0.942914	0.920883	0.93917	0.802507	0.2379	0.122217	0.099214	0.091946
26.3167	0.932334	0.906501	0.921943	0.772969	0.236745	0.116418	0.098215	0.085026
26.4333	0.934435	0.935176	0.923418	0.820834	0.233992	0.118983	0.088278	0.084623
26.55	0.93288	0.938907	0.921538	0.77768	0.249454	0.116768	0.094246	0.082562
26.6667	0.941582	0.92147	0.904732	0.793903	0.248878	0.121601	0.100627	0.082193
26.7833	0.9294	0.903571	0.912229	0.791897	0.249216	0.121314	0.094528	0.081116
26.9	0.935953	0.918573	0.908219	0.780173	0.259889	0.126033	0.093702	0.084533
27.0167	0.943928	0.913028	0.904667	0.806035	0.25954	0.121631	0.096679	0.083118
27.1333	0.921701	0.889963	0.921543	0.794116	0.254919	0.124458	0.090154	0.082338
27.25	0.925021	0.929175	0.912558	0.801206	0.253536	0.124423	0.097114	0.083284
27.3667	0.938242	0.916293	0.915699	0.792054	0.24729	0.115399	0.096043	0.081232
27.4833	0.950203	0.908548	0.918086	0.812332	0.252898	0.119289	0.093669	0.080888
27.6	0.939113	0.8936	0.921964	0.786608	0.251701	0.117919	0.096498	0.083916
27.7167	0.931367	0.913284	0.90921	0.807795	0.242359	0.120553	0.095078	0.08124
27.8333	0.903036	0.91183	0.928612	0.82177	0.251398	0.1142	0.096806	0.078253
27.95	0.942742	0.914155	0.907296	0.789397	0.249262	0.12023	0.100554	0.082017
28.0667	0.938295	0.917682	0.896356	0.7941	0.25497	0.112977	0.089558	0.080319
28.1833	0.918218	0.920837	0.92402	0.808702	0.252012	0.125618	0.092294	0.081957
28.3	0.95319	0.914189	0.920532	0.780975	0.256685	0.118916	0.089786	0.078695
28.4167	0.934197	0.909609	0.908986	0.782837	0.252568	0.116552	0.092978	0.080598
28.5333	0.912997	0.928397	0.904643	0.786029	0.239673	0.118181	0.091172	0.080521
28.65	0.946316	0.912889	0.92624	0.778139	0.251168	0.11883	0.100919	0.079978
28.7667	0.917762	0.928269	0.903994	0.794086	0.2459	0.12138	0.097894	0.081956
28.8833	0.923514	0.919087	0.926149	0.801764	0.259328	0.118091	0.091659	0.081486
29	0.939334	0.926615	0.910786	0.794792	0.257423	0.119818	0.097013	0.084422
29.1167	0.929628	0.920634	0.884332	0.788208	0.252328	0.11739	0.090874	0.081262
29.2333	0.94907	0.900506	0.889604	0.800104	0.262189	0.115438	0.094767	0.082166
29.35	0.958652	0.898499	0.916611	0.782896	0.249864	0.11647	0.09162	0.08175
29.4667	0.926476	0.904002	0.914072	0.788983	0.253253	0.112428	0.089464	0.084806
29.5833	0.912929	0.904813	0.893586	0.800769	0.255886	0.12316	0.097628	0.080063
29.7	0.894638	0.903427	0.899627	0.779058	0.258806	0.114763	0.093241	0.079669
29.8167	0.93021	0.904139	0.900523	0.771692	0.258682	0.120071	0.096455	0.086903
29.9333	0.915237	0.891846	0.87383	0.796487	0.268934	0.121093	0.096841	0.080222
30.05	0.911809	0.882778	0.902812	0.792785	0.25815	0.123215	0.098452	0.079832
30.1667	0.928461	0.878155	0.90453	0.780614	0.262601	0.121846	0.094421	0.081854
30.2833	0.888464	0.887842	0.890459	0.787317	0.256354	0.124964	0.095897	0.081997
30.4	0.909158	0.909482	0.915053	0.791131	0.265929	0.127249	0.093836	0.077887
30.5167	0.929461	0.90299	0.90083	0.785435	0.264391	0.118649	0.089097	0.082905

## Sheet: DLDD primary data n3
val (nM)	0	0.32	1	3.2	10	32	100	316
time (min)
0	0.00050267	0.000612	0.000504	0.000566	0.000684	0.00049	0.000357	0.000523
0.55	0.00802368	0.007053	0.008373	0.006129	0.006907	0.008788	0.007271	0.00999
0.666666	0.00978304	0.008868	0.011466	0.007966	0.009001	0.011347	0.009903	0.012309
0.783333	0.0125668	0.012087	0.014579	0.010392	0.011362	0.013533	0.011868	0.015025
0.9	0.0148485	0.015002	0.017178	0.013416	0.014399	0.017258	0.013528	0.017082
1.01667	0.0192895	0.018506	0.021311	0.016831	0.017826	0.01882	0.015426	0.019687
1.13333	0.0227319	0.021745	0.024003	0.019739	0.019289	0.021343	0.017488	0.021984
1.25	0.027486	0.025925	0.029052	0.021761	0.022447	0.022983	0.019275	0.023934
1.36667	0.0309688	0.030149	0.033106	0.026897	0.025376	0.026632	0.02136	0.026409
1.48333	0.0363085	0.033891	0.037506	0.030034	0.02848	0.027401	0.023144	0.028069
1.6	0.0410592	0.039619	0.044409	0.03449	0.030706	0.030594	0.024259	0.03086
1.71667	0.0443513	0.04543	0.049087	0.040205	0.034826	0.03266	0.026397	0.032247
1.83333	0.0512558	0.049868	0.054348	0.043578	0.0385	0.034051	0.028191	0.033935
1.95	0.056407	0.056805	0.063242	0.047917	0.042487	0.036472	0.029015	0.0356
2.06667	0.0639897	0.062368	0.067795	0.053347	0.045393	0.038874	0.030959	0.037074
2.18333	0.0676229	0.068467	0.071873	0.059414	0.049712	0.039918	0.031692	0.038569
2.3	0.0776937	0.072385	0.078544	0.061758	0.053276	0.042775	0.033553	0.040106
2.41667	0.0804427	0.081064	0.08246	0.071014	0.056948	0.043609	0.034918	0.041428
2.53333	0.0877057	0.090607	0.089149	0.072011	0.058038	0.045054	0.03636	0.044143
2.65	0.0995729	0.094353	0.102944	0.080926	0.062881	0.047097	0.037064	0.043907
2.76667	0.105291	0.106504	0.110303	0.088783	0.071557	0.049184	0.038361	0.045994
2.88333	0.112275	0.120839	0.113537	0.0952	0.068169	0.051371	0.039571	0.04884
3	0.119753	0.119867	0.119035	0.100816	0.081208	0.053191	0.041232	0.049331
3.11667	0.129525	0.126494	0.128658	0.110908	0.084792	0.055342	0.042258	0.050022
3.23333	0.132837	0.135212	0.137545	0.119122	0.084425	0.056178	0.043614	0.052531
3.35	0.140712	0.144317	0.147007	0.119762	0.087153	0.057206	0.044056	0.052106
3.46667	0.152467	0.157039	0.15343	0.128288	0.100731	0.058418	0.045393	0.054042
3.58333	0.158918	0.162757	0.165826	0.141027	0.104294	0.062526	0.046772	0.055376
3.7	0.1612	0.16697	0.171692	0.142719	0.101331	0.063843	0.047416	0.057145
3.81667	0.173108	0.178592	0.184521	0.151173	0.113569	0.06217	0.048521	0.057686
3.93333	0.195637	0.186393	0.192587	0.167778	0.124134	0.063753	0.048715	0.056801
4.05	0.201064	0.200268	0.205931	0.168018	0.119959	0.068145	0.050782	0.06184
4.16667	0.198127	0.205911	0.217268	0.182715	0.126649	0.064506	0.051086	0.061421
4.28333	0.215603	0.219042	0.224919	0.19428	0.140623	0.071383	0.053136	0.059913
4.4	0.234548	0.234122	0.233023	0.19379	0.145558	0.068618	0.05279	0.060279
4.51667	0.233729	0.236238	0.237151	0.206337	0.143528	0.077309	0.054252	0.064669
4.63333	0.247957	0.24353	0.248029	0.208549	0.152898	0.071504	0.054758	0.059052
4.75	0.25298	0.259803	0.254806	0.218044	0.154285	0.071492	0.055273	0.061724
4.86667	0.262707	0.265884	0.267915	0.228236	0.168118	0.07528	0.058775	0.067125
4.98333	0.274553	0.281002	0.273365	0.23895	0.171801	0.081248	0.059592	0.067211
5.1	0.268712	0.286651	0.290694	0.250184	0.182906	0.082717	0.057973	0.065887
5.21667	0.293409	0.287107	0.293466	0.253963	0.180012	0.082636	0.058372	0.065031
5.33333	0.311268	0.303484	0.312198	0.262814	0.186972	0.083775	0.057021	0.070392
5.45	0.31503	0.317914	0.327024	0.273435	0.197071	0.088239	0.063389	0.06611
5.56667	0.31801	0.328768	0.332398	0.286625	0.208735	0.086512	0.060232	0.068276
5.68333	0.334221	0.334151	0.336544	0.289129	0.209049	0.085329	0.062032	0.07092
5.8	0.337359	0.356501	0.338899	0.299257	0.218861	0.091182	0.0599	0.071469
5.91667	0.350775	0.353718	0.351808	0.303798	0.218279	0.090575	0.059405	0.07292
6.03333	0.366429	0.365036	0.3781	0.314298	0.234859	0.092737	0.063715	0.069702
6.15	0.362749	0.387993	0.374439	0.316412	0.23463	0.093789	0.06217	0.073423
6.26667	0.390193	0.38623	0.386596	0.340203	0.241727	0.095452	0.066498	0.075317
6.38333	0.392343	0.38996	0.397026	0.343258	0.238677	0.094735	0.064156	0.077032
6.5	0.405896	0.392436	0.409101	0.356642	0.259422	0.084596	0.065693	0.07533
6.61667	0.403975	0.418186	0.41258	0.362977	0.261041	0.09479	0.063976	0.074971
6.73333	0.415864	0.41733	0.425354	0.374433	0.264908	0.098339	0.068291	0.078309
6.85	0.428298	0.439845	0.43145	0.381338	0.273822	0.097808	0.067708	0.074702
6.96667	0.449989	0.451562	0.437281	0.378396	0.278309	0.098532	0.067917	0.077155
7.08333	0.434016	0.461671	0.4556	0.405947	0.287249	0.100534	0.068305	0.084887
7.2	0.455295	0.460708	0.459151	0.395157	0.290725	0.098656	0.064994	0.076615
7.31666	0.471139	0.485578	0.461357	0.419479	0.292049	0.105975	0.070025	0.08336
7.43333	0.470156	0.490401	0.494811	0.410976	0.308248	0.115487	0.068298	0.077022
7.55	0.489891	0.496377	0.493272	0.427142	0.304947	0.106369	0.066935	0.080789
7.66666	0.472263	0.520029	0.490819	0.454115	0.322085	0.110184	0.068811	0.079879
7.78333	0.496111	0.512952	0.500838	0.441576	0.327925	0.104297	0.070324	0.082792
7.9	0.517887	0.528039	0.516549	0.445054	0.32902	0.111307	0.073419	0.08173
8.01666	0.507678	0.532585	0.523721	0.46064	0.339334	0.114497	0.070749	0.08225
8.13333	0.520762	0.548818	0.521051	0.485927	0.345902	0.112508	0.077533	0.082787
8.25	0.533488	0.55515	0.544968	0.500648	0.35765	0.119704	0.068949	0.085193
8.36666	0.56218	0.563446	0.546266	0.499425	0.358323	0.112955	0.076875	0.082585
8.48333	0.558931	0.563549	0.564965	0.509762	0.362521	0.113058	0.070446	0.08323
8.6	0.565451	0.571404	0.547255	0.507562	0.37606	0.118792	0.075529	0.086926
8.71666	0.583442	0.58686	0.573929	0.511738	0.376626	0.112762	0.071519	0.084627
8.83333	0.57613	0.596325	0.586896	0.541291	0.377376	0.121427	0.075979	0.082993
8.95	0.588116	0.602888	0.588895	0.51441	0.390315	0.117007	0.077357	0.086843
9.06666	0.607677	0.596378	0.598898	0.5324	0.388713	0.121957	0.078408	0.084267
9.18333	0.606762	0.615553	0.606516	0.541688	0.410996	0.11853	0.075671	0.083898
9.3	0.620199	0.6279	0.612405	0.552393	0.414029	0.128277	0.073488	0.085445
9.41666	0.617947	0.625666	0.621382	0.558489	0.412505	0.122599	0.074512	0.088477
9.53333	0.631778	0.650205	0.617976	0.562482	0.404283	0.121085	0.078472	0.087436
9.65	0.635304	0.639799	0.629676	0.574602	0.427031	0.121256	0.076328	0.091012
9.76666	0.642518	0.647875	0.636085	0.581058	0.436756	0.123798	0.080426	0.087425
9.88333	0.661774	0.66742	0.662386	0.590224	0.437818	0.126592	0.080725	0.089119
10	0.641335	0.65626	0.652236	0.576902	0.447559	0.13159	0.082558	0.087599
10.1167	0.673017	0.68283	0.672529	0.597358	0.458907	0.130358	0.084156	0.093557
10.2333	0.670769	0.675473	0.665874	0.598639	0.443555	0.131547	0.083947	0.087781
10.35	0.666954	0.705828	0.674976	0.627855	0.464833	0.130193	0.08496	0.087545
10.4667	0.674326	0.714232	0.677288	0.608277	0.457985	0.139123	0.080498	0.091386
10.5833	0.681255	0.719191	0.701231	0.613051	0.480038	0.13389	0.077354	0.087293
10.7	0.694871	0.70933	0.691226	0.63585	0.476896	0.132321	0.085484	0.088308
10.8167	0.702664	0.720214	0.708555	0.619639	0.496039	0.136074	0.087337	0.089553
10.9333	0.707572	0.741081	0.714747	0.661421	0.486949	0.142105	0.084145	0.089346
11.05	0.73767	0.740643	0.710035	0.646887	0.488021	0.140791	0.081961	0.095043
11.1667	0.722161	0.718788	0.735207	0.645244	0.492919	0.143599	0.083512	0.092915
11.2833	0.739758	0.743823	0.728865	0.654085	0.499179	0.142786	0.084067	0.089795
11.4	0.736334	0.750171	0.733938	0.668251	0.503594	0.150461	0.078857	0.09153
11.5167	0.740572	0.761526	0.755843	0.652079	0.502985	0.139005	0.081006	0.100791
11.6333	0.741308	0.75225	0.738606	0.677439	0.527114	0.146001	0.080407	0.096236
11.75	0.760547	0.773953	0.74721	0.682505	0.52435	0.147207	0.081503	0.091634
11.8667	0.76551	0.763973	0.756324	0.681002	0.534293	0.149311	0.084136	0.089437
11.9833	0.773836	0.776537	0.76995	0.711693	0.547437	0.145507	0.086463	0.097352
12.1	0.775431	0.801991	0.760797	0.684113	0.525237	0.145843	0.08386	0.092026
12.2167	0.7605	0.792699	0.779239	0.711522	0.56232	0.160213	0.088092	0.096736
12.3333	0.785756	0.798029	0.770324	0.719005	0.564246	0.151021	0.09047	0.096864
12.45	0.775258	0.814781	0.791988	0.717121	0.560412	0.158588	0.082505	0.090866
12.5667	0.767677	0.814619	0.783447	0.717255	0.576942	0.15145	0.085734	0.097738
12.6833	0.783405	0.811324	0.815254	0.701059	0.570742	0.153117	0.086044	0.097719
12.8	0.791668	0.818638	0.793734	0.724282	0.575367	0.153364	0.08734	0.093463
12.9167	0.805384	0.82566	0.807786	0.730398	0.584818	0.155888	0.085379	0.099429
13.0333	0.797785	0.818594	0.819096	0.728848	0.582917	0.150957	0.08335	0.094683
13.15	0.806201	0.841816	0.807253	0.73377	0.56985	0.15233	0.084101	0.095252
13.2667	0.81443	0.812858	0.82197	0.729924	0.603788	0.156973	0.086232	0.099008
13.3833	0.814025	0.829608	0.824046	0.743692	0.584862	0.157412	0.083181	0.097301
13.5	0.818625	0.814885	0.835633	0.7382	0.609698	0.154578	0.085444	0.092311
13.6167	0.821548	0.829697	0.811408	0.758008	0.590026	0.163642	0.084241	0.096379
13.7333	0.830831	0.847472	0.837905	0.743809	0.619186	0.161593	0.086467	0.099957
13.85	0.816149	0.849874	0.81882	0.761176	0.612073	0.166895	0.088221	0.097167
13.9667	0.832672	0.85376	0.837033	0.765473	0.631235	0.165752	0.087	0.094769
14.0833	0.838657	0.874006	0.834512	0.770909	0.61794	0.158865	0.086335	0.099537
14.2	0.840992	0.870463	0.858663	0.781399	0.618261	0.1618	0.084824	0.098778
14.3167	0.837541	0.869672	0.845131	0.764293	0.6283	0.167084	0.088066	0.095953
14.4333	0.861868	0.8785	0.857275	0.788382	0.652133	0.167691	0.086592	0.098635
14.55	0.860313	0.847135	0.852518	0.776521	0.644176	0.170621	0.08594	0.093797
14.6667	0.84025	0.860201	0.865371	0.812971	0.652418	0.175524	0.086271	0.095523
14.7833	0.857929	0.850083	0.86521	0.789618	0.64999	0.167685	0.089927	0.103562
14.9	0.889318	0.860352	0.85664	0.799801	0.660518	0.162144	0.090255	0.102609
15.0167	0.850523	0.907536	0.871349	0.778788	0.660072	0.171028	0.08855	0.098566
15.1333	0.864592	0.906825	0.847312	0.783518	0.67138	0.170764	0.091259	0.101209
15.25	0.876216	0.879841	0.880141	0.793513	0.667502	0.174386	0.093276	0.096864
15.3667	0.883765	0.885932	0.861542	0.808719	0.655232	0.181418	0.088063	0.099806
15.4833	0.889491	0.927252	0.865613	0.802009	0.658396	0.172767	0.087675	0.097215
15.6	0.893193	0.886597	0.855287	0.797508	0.681536	0.174574	0.0882	0.09858
15.7167	0.902795	0.90231	0.864524	0.794897	0.674307	0.185046	0.090924	0.104767
15.8333	0.850436	0.915051	0.86243	0.798718	0.685281	0.187876	0.086148	0.098492
15.95	0.871928	0.89117	0.898833	0.823114	0.685738	0.180208	0.085908	0.103867
16.0667	0.884678	0.905473	0.893096	0.816652	0.684335	0.18196	0.089614	0.102042
16.1833	0.893946	0.918042	0.876971	0.8191	0.7058	0.182459	0.087539	0.098897
16.3	0.880133	0.898246	0.876022	0.839566	0.693945	0.178867	0.090497	0.100611
16.4167	0.897722	0.910435	0.887194	0.832612	0.686824	0.182636	0.081607	0.104043
16.5333	0.908398	0.934731	0.890691	0.844368	0.694638	0.184606	0.093118	0.100583
16.65	0.902598	0.894585	0.882325	0.809128	0.704158	0.184746	0.095028	0.099294
16.7667	0.898589	0.906305	0.893556	0.820236	0.703478	0.182758	0.096587	0.101875
16.8833	0.919286	0.92096	0.875498	0.824368	0.692787	0.183817	0.088666	0.100828
17	0.912415	0.922738	0.909861	0.844056	0.705221	0.189837	0.088151	0.098367
17.1167	0.911974	0.902741	0.88351	0.831905	0.722475	0.191665	0.084659	0.103903
17.2333	0.904934	0.906225	0.923156	0.85749	0.7271	0.189177	0.094496	0.098019
17.35	0.917117	0.924054	0.927383	0.821425	0.725408	0.18972	0.090865	0.103299
17.4667	0.886929	0.915648	0.901137	0.854333	0.725071	0.18516	0.090541	0.107181
17.5833	0.900341	0.905543	0.893093	0.833247	0.722142	0.195214	0.093024	0.107988
17.7	0.921598	0.914814	0.90057	0.840019	0.733141	0.188047	0.088187	0.104007
17.8167	0.920111	0.899261	0.920232	0.83543	0.736971	0.191854	0.087611	0.093343
17.9333	0.910098	0.925809	0.883232	0.844689	0.735295	0.200045	0.088724	0.104174
18.05	0.922806	0.928011	0.894725	0.846222	0.729895	0.195112	0.086459	0.094229
18.1667	0.913183	0.943235	0.921818	0.850237	0.754195	0.192211	0.093578	0.104619
18.2833	0.928244	0.947824	0.926227	0.878351	0.749568	0.194149	0.092083	0.102781
18.4	0.928521	0.929497	0.919236	0.844578	0.754318	0.19555	0.098606	0.101061
18.5167	0.932878	0.933712	0.918232	0.866333	0.744117	0.196949	0.087871	0.100588
18.6333	0.941229	0.934846	0.935745	0.852436	0.746113	0.198441	0.091761	0.101534
18.75	0.916171	0.935904	0.915566	0.836965	0.754171	0.190723	0.087593	0.106977
18.8667	0.917655	0.944918	0.93166	0.842237	0.751216	0.201242	0.089994	0.099699
18.9833	0.919209	0.940317	0.915717	0.845682	0.751331	0.199096	0.091775	0.100776
19.1	0.932847	0.96907	0.938086	0.862607	0.75292	0.20009	0.089693	0.101261
19.2167	0.911877	0.952618	0.910176	0.833266	0.765773	0.204672	0.095033	0.105806
19.3333	0.930035	0.961634	0.937597	0.868179	0.760612	0.210431	0.088766	0.099713
19.45	0.93325	0.934097	0.904078	0.860737	0.757281	0.202857	0.093525	0.096132
19.5667	0.926379	0.954016	0.929695	0.846928	0.763138	0.207793	0.094467	0.105977
19.6833	0.929928	0.939694	0.92622	0.86018	0.776739	0.211993	0.088916	0.103673
19.8	0.934106	0.951472	0.931486	0.875968	0.777987	0.211766	0.093974	0.099262
19.9167	0.953998	0.94726	0.929903	0.857026	0.777013	0.214238	0.08934	0.104795
20.0333	0.919055	0.928439	0.938203	0.846613	0.769652	0.21619	0.093553	0.106254
20.15	0.932156	0.945486	0.934602	0.871072	0.785459	0.20921	0.089931	0.105553
20.2667	0.918582	0.963982	0.927372	0.839586	0.784506	0.217469	0.091737	0.098906
20.3833	0.939855	0.957441	0.942422	0.840733	0.783416	0.220082	0.09236	0.100905
20.5	0.932021	0.961897	0.935928	0.845656	0.776487	0.219267	0.084198	0.101915
20.6167	0.933265	0.950728	0.938726	0.870482	0.779454	0.222316	0.092275	0.103721
20.7333	0.932236	0.97412	0.937367	0.863122	0.785657	0.225088	0.087847	0.105837
20.85	0.942935	0.953245	0.933906	0.867494	0.798969	0.214359	0.09004	0.100352
20.9667	0.933631	0.963607	0.959229	0.86683	0.799406	0.217257	0.089945	0.097154
21.0833	0.935945	0.983516	0.946211	0.859028	0.795542	0.21832	0.099282	0.104187
21.2	0.95096	0.959782	0.933676	0.867296	0.814766	0.225408	0.088406	0.105425
21.3167	0.947248	0.951479	0.898306	0.872597	0.789388	0.230492	0.092429	0.100337
21.4333	0.938802	0.94957	0.953824	0.87993	0.796492	0.229557	0.097729	0.099981
21.55	0.921759	0.968673	0.923409	0.872072	0.787928	0.22556	0.091658	0.105907
21.6667	0.960106	0.961181	0.921276	0.866333	0.787225	0.226343	0.088714	0.101938
21.7833	0.952725	0.968745	0.94927	0.899078	0.807185	0.228915	0.092625	0.098808
21.9	0.95202	0.938828	0.953649	0.877557	0.78737	0.231317	0.094803	0.096412
22.0167	0.942099	0.976683	0.915669	0.873498	0.787172	0.225667	0.091356	0.097664
22.1333	0.905974	0.941248	0.924515	0.851027	0.810273	0.22535	0.09176	0.10642
22.25	0.946789	0.961978	0.921144	0.855147	0.804648	0.234208	0.094316	0.10719
22.3667	0.931422	0.947554	0.924893	0.880086	0.794204	0.23458	0.095358	0.100274
22.4833	0.914258	0.942047	0.932039	0.866286	0.775676	0.231857	0.090907	0.095505
22.6	0.948183	0.984814	0.910216	0.86621	0.7902	0.231638	0.09598	0.099113
22.7167	0.930938	0.946089	0.910923	0.871514	0.801639	0.237169	0.098711	0.102463
22.8333	0.96141	0.939541	0.956745	0.879458	0.785634	0.237315	0.095234	0.097442
22.95	0.932731	0.952177	0.928393	0.862845	0.796964	0.233428	0.090576	0.099339
23.0667	0.954058	0.94043	0.94911	0.877108	0.804868	0.234132	0.092787	0.098281
23.1833	0.977961	0.97785	0.934765	0.888687	0.794824	0.238295	0.091932	0.098493
23.3	0.931674	0.958806	0.941519	0.875943	0.811459	0.241597	0.091105	0.101718
23.4167	0.952807	0.981697	0.934263	0.867244	0.797428	0.240406	0.096853	0.10472
23.5333	0.941177	0.930108	0.943091	0.87525	0.80927	0.241178	0.093127	0.101483
23.65	0.925316	0.944893	0.939143	0.851711	0.83088	0.243497	0.091696	0.100472
23.7667	0.937775	0.957093	0.93537	0.879553	0.81321	0.243538	0.094058	0.100638
23.8833	0.943222	0.948035	0.929345	0.861114	0.821375	0.254315	0.09657	0.096795
24	0.9327	0.965577	0.939415	0.873329	0.810014	0.249631	0.094091	0.104084
24.1167	0.887611	0.943895	0.939056	0.878954	0.789526	0.261953	0.09166	0.103378
24.2333	0.920706	0.950248	0.962775	0.889316	0.820476	0.253448	0.094266	0.096585
24.35	0.956519	0.952226	0.929075	0.872466	0.816212	0.263028	0.092816	0.101538
24.4667	0.934534	1	0.92761	0.84766	0.812645	0.249307	0.087597	0.095086
24.5833	0.927099	0.953396	0.919098	0.867765	0.816934	0.25671	0.087568	0.100041
24.7	0.942337	0.930241	0.91923	0.874947	0.82036	0.251181	0.08458	0.0994
24.8167	0.955441	0.950804	0.952211	0.857082	0.823251	0.256811	0.090562	0.099297
24.9333	0.938571	0.961232	0.934329	0.84277	0.81831	0.252705	0.086412	0.097402
25.05	0.946249	0.982824	0.928246	0.860171	0.808194	0.259713	0.096331	0.09657
25.1667	0.937283	0.92848	0.926038	0.847801	0.808814	0.261599	0.099005	0.099564
25.2833	0.959257	0.951861	0.933899	0.877791	0.838993	0.275706	0.087962	0.097945
25.4	0.919847	0.952612	0.941955	0.851198	0.819959	0.266945	0.096523	0.101484
25.5167	0.91142	0.95823	0.945393	0.858211	0.825023	0.264287	0.088806	0.097841
25.6333	0.94827	0.929787	0.922676	0.870407	0.836212	0.266332	0.093945	0.102727
25.75	0.928044	0.928033	0.939538	0.886599	0.831431	0.267411	0.088212	0.099368
25.8667	0.918265	0.943749	0.94218	0.876723	0.827325	0.271344	0.092948	0.101043
25.9833	0.903765	0.968517	0.92829	0.865061	0.84591	0.265201	0.090955	0.097541
26.1	0.948408	0.94326	0.937226	0.857229	0.840594	0.27291	0.093171	0.100304
26.2167	0.917329	0.995545	0.931955	0.884794	0.835626	0.276684	0.09962	0.095489
26.3333	0.948948	0.953747	0.939124	0.874442	0.837071	0.270506	0.089689	0.100342
26.45	0.955715	0.957698	0.935769	0.86796	0.834735	0.276465	0.089617	0.0967
26.5667	0.926599	0.975438	0.936806	0.87622	0.805842	0.275085	0.092443	0.104821
26.6833	0.939041	0.923796	0.909178	0.873535	0.821646	0.281674	0.091992	0.102576
26.8	0.941813	0.98016	0.919183	0.870661	0.846475	0.273049	0.08924	0.097462
26.9167	0.930649	0.913963	0.934045	0.86363	0.86035	0.278544	0.088016	0.098785
27.0333	0.928565	0.951387	0.916711	0.881069	0.842559	0.278892	0.082617	0.100845
27.15	0.933964	0.946279	0.910992	0.874107	0.850725	0.291755	0.092377	0.096725
27.2667	0.919446	0.923865	0.925137	0.862513	0.840497	0.292536	0.094781	0.100542
27.3833	0.955625	0.942907	0.930365	0.857349	0.811069	0.284941	0.092156	0.096428
27.5	0.937234	0.940134	0.936779	0.88247	0.834123	0.287842	0.094014	0.099119
27.6167	0.890605	0.928496	0.901128	0.878855	0.835482	0.28474	0.089943	0.099113
27.7333	0.899927	0.950796	0.910947	0.858872	0.850358	0.298605	0.091169	0.096378
27.85	0.921458	0.918564	0.913449	0.860722	0.823943	0.293245	0.084292	0.097071
27.9667	0.92424	0.932697	0.942919	0.865942	0.815422	0.303687	0.091912	0.097357
28.0833	0.91294	0.972139	0.924192	0.865258	0.850383	0.310162	0.090147	0.09954
28.2	0.927397	0.934602	0.9297	0.85876	0.834607	0.296331	0.085798	0.100298
28.3167	0.932485	0.949745	0.91152	0.848856	0.836449	0.303094	0.084876	0.094989
28.4333	0.942981	0.922941	0.918518	0.85933	0.849915	0.310195	0.087193	0.102044
28.55	0.932396	0.949331	0.921637	0.867958	0.839668	0.294207	0.094369	0.099949
28.6667	0.929791	0.942025	0.937667	0.874729	0.822915	0.311142	0.091429	0.095995
28.7833	0.929778	0.944911	0.937646	0.850688	0.843143	0.299683	0.090935	0.093385
28.9	0.882123	0.937198	0.900648	0.840183	0.819081	0.3024	0.087043	0.096735
29.0167	0.924255	0.917258	0.914761	0.845413	0.827234	0.315758	0.093893	0.095154
29.1333	0.923864	0.931065	0.911062	0.858219	0.845221	0.317759	0.086179	0.095116
29.25	0.919539	0.924194	0.929721	0.857602	0.836814	0.306838	0.086952	0.096588
29.3667	0.922228	0.935935	0.934919	0.859171	0.864199	0.309104	0.086478	0.101928
29.4833	0.925048	0.931644	0.913593	0.852236	0.868237	0.315527	0.088833	0.100815
29.6	0.921212	0.938437	0.904996	0.846022	0.842375	0.312678	0.086252	0.093099
29.7167	0.930563	0.941545	0.902923	0.855302	0.839276	0.320483	0.088229	0.094401
29.8333	0.924499	0.921425	0.952586	0.849989	0.84777	0.30462	0.091831	0.093779
29.95	0.904221	0.910848	0.894348	0.85144	0.830907	0.309529	0.089408	0.09943
30.0667	0.91315	0.911217	0.916931	0.848279	0.852867	0.302522	0.087884	0.093475
30.1833	0.944557	0.912252	0.919144	0.855698	0.851971	0.313035	0.090961	0.100432
30.3	0.908764	0.938188	0.911617	0.843556	0.866327	0.311734	0.087918	0.097364
30.4167	0.904414	0.941673	0.89541	0.867223	0.840225	0.329921	0.093135	0.100702
30.5333	0.897808	0.946242	0.898241	0.853877	0.834701	0.328095	0.090153	0.097643

## Sheet: DDLD primary data n1
val (nM)	0	0.32	1	3.2	10	32	100	316
time (min)
0	0.00095329	0.000848	0.000837	0.000677	0.000793	0.001002	0.000805	0.00091
0.533333	0.0146492	0.013988	0.01703	0.013804	0.01326	0.016878	0.01444	0.014122
0.65	0.0182631	0.017103	0.020596	0.017067	0.016987	0.02007	0.017487	0.018062
0.766666	0.0227746	0.020388	0.025133	0.020064	0.020427	0.024279	0.020879	0.02116
0.883333	0.027134	0.024351	0.028983	0.023969	0.022637	0.026961	0.023645	0.025118
1	0.0320525	0.028629	0.033777	0.028038	0.025739	0.030208	0.026806	0.027609
1.11667	0.0363223	0.03292	0.039178	0.03169	0.028598	0.033802	0.028631	0.030453
1.23333	0.0434782	0.038743	0.044581	0.036095	0.032189	0.036652	0.031104	0.032474
1.35	0.0491836	0.04538	0.049813	0.04131	0.035129	0.039735	0.034601	0.034051
1.46667	0.0538133	0.049088	0.056666	0.046037	0.039089	0.042928	0.035797	0.036925
1.58333	0.0616927	0.056039	0.061915	0.052087	0.041088	0.04457	0.038767	0.039415
1.7	0.0701117	0.060652	0.06819	0.056357	0.045671	0.047405	0.039664	0.041294
1.81667	0.0784225	0.074629	0.074641	0.058888	0.048441	0.051058	0.041842	0.045173
1.93333	0.0853196	0.078111	0.086769	0.066859	0.050585	0.050345	0.046041	0.046009
2.05	0.0917967	0.087993	0.093532	0.074005	0.05606	0.056446	0.047609	0.047849
2.16667	0.102838	0.097883	0.102241	0.073257	0.059341	0.055588	0.04862	0.048691
2.28333	0.112309	0.100716	0.105524	0.088994	0.066393	0.05628	0.049763	0.05048
2.4	0.118689	0.118241	0.114516	0.091759	0.066584	0.06137	0.052326	0.052537
2.51667	0.127662	0.124761	0.126814	0.103392	0.073889	0.064787	0.056411	0.053455
2.63333	0.143951	0.141077	0.145539	0.10592	0.071978	0.064045	0.053836	0.056834
2.75	0.155808	0.144348	0.151078	0.107348	0.076712	0.06605	0.05496	0.057311
2.86667	0.168385	0.162202	0.164706	0.119181	0.07975	0.068452	0.059964	0.05543
2.98333	0.175435	0.176509	0.169945	0.122004	0.086373	0.073229	0.056329	0.056012
3.1	0.190959	0.180965	0.183768	0.133153	0.087816	0.071666	0.059277	0.06017
3.21667	0.196489	0.189402	0.19296	0.141538	0.093235	0.078355	0.060159	0.061922
3.33333	0.209755	0.204263	0.200581	0.151819	0.098424	0.078717	0.065402	0.061913
3.45	0.221721	0.214712	0.211505	0.159075	0.106822	0.074887	0.065131	0.064544
3.56667	0.228781	0.227448	0.225852	0.163993	0.107328	0.083149	0.064812	0.065335
3.68333	0.239013	0.23429	0.237173	0.16999	0.110875	0.07962	0.067463	0.066867
3.8	0.258957	0.242055	0.240345	0.186905	0.11573	0.079972	0.072308	0.067883
3.91667	0.267493	0.25509	0.249178	0.195668	0.118279	0.083247	0.067464	0.065933
4.03333	0.278698	0.275808	0.265204	0.199833	0.12141	0.083951	0.068805	0.069045
4.15	0.293849	0.292577	0.276997	0.215766	0.128616	0.092584	0.06906	0.074256
4.26667	0.297298	0.300562	0.285147	0.214115	0.136803	0.095139	0.076367	0.069282
4.38333	0.316998	0.316239	0.301619	0.232242	0.140303	0.094998	0.073715	0.073522
4.5	0.325742	0.319086	0.306929	0.238894	0.147376	0.093061	0.072848	0.074246
4.61667	0.344261	0.326079	0.322123	0.246738	0.153772	0.091727	0.076764	0.074298
4.73333	0.34618	0.342762	0.326099	0.257661	0.151379	0.09526	0.074049	0.080282
4.85	0.351867	0.354416	0.348649	0.261036	0.149262	0.098408	0.073265	0.080337
4.96667	0.375208	0.370412	0.358145	0.268808	0.155835	0.096756	0.07593	0.07479
5.08333	0.391497	0.385771	0.366051	0.283605	0.170624	0.097196	0.077752	0.076757
5.2	0.392693	0.394434	0.374599	0.285234	0.171525	0.10115	0.075891	0.080821
5.31667	0.416315	0.406752	0.390173	0.300094	0.177372	0.1005	0.084382	0.07783
5.43333	0.436891	0.413581	0.408046	0.311734	0.173182	0.106375	0.083296	0.084128
5.55	0.440147	0.429271	0.41349	0.312906	0.182472	0.101919	0.075349	0.080451
5.66667	0.441169	0.437203	0.420572	0.333934	0.185594	0.108206	0.082018	0.079953
5.78333	0.46445	0.45407	0.426458	0.33912	0.196466	0.106945	0.082702	0.089279
5.9	0.465663	0.466836	0.444401	0.349546	0.202414	0.109295	0.079336	0.084227
6.01667	0.48332	0.475586	0.452591	0.355984	0.199828	0.10915	0.086749	0.084346
6.13333	0.473821	0.501303	0.458763	0.356815	0.20998	0.111708	0.083194	0.080795
6.25	0.497884	0.500174	0.480096	0.37732	0.210952	0.107405	0.083934	0.08359
6.36667	0.510971	0.515423	0.487901	0.377989	0.221853	0.113185	0.08752	0.088447
6.48333	0.523041	0.526514	0.489403	0.387868	0.220587	0.113619	0.087415	0.089871
6.6	0.535146	0.527132	0.501693	0.397126	0.229978	0.110864	0.090696	0.094953
6.71667	0.547417	0.539474	0.519647	0.40639	0.236366	0.114922	0.088449	0.091604
6.83333	0.543875	0.532405	0.513557	0.421211	0.230537	0.11799	0.091424	0.085573
6.95	0.5567	0.55432	0.536984	0.42199	0.242142	0.12048	0.089737	0.090957
7.06667	0.571526	0.556729	0.533839	0.432018	0.244108	0.122669	0.09327	0.085152
7.18333	0.596143	0.579211	0.547744	0.433981	0.257693	0.123066	0.091694	0.092122
7.3	0.582944	0.580241	0.570048	0.431912	0.264716	0.121877	0.092851	0.093426
7.41666	0.605147	0.604611	0.571329	0.452046	0.263809	0.125221	0.090397	0.088305
7.53333	0.604135	0.61408	0.573735	0.451807	0.266468	0.124292	0.092926	0.091988
7.65	0.605359	0.622194	0.578029	0.470715	0.270366	0.121691	0.090427	0.100183
7.76666	0.6379	0.637046	0.590121	0.486885	0.269321	0.125548	0.094254	0.097516
7.88333	0.636043	0.627347	0.605719	0.496633	0.284047	0.129546	0.095199	0.094671
8	0.646214	0.656022	0.623015	0.49057	0.28722	0.123324	0.094959	0.101453
8.11666	0.652188	0.640028	0.610386	0.504258	0.291905	0.127031	0.097239	0.089294
8.23333	0.664144	0.659262	0.622597	0.51513	0.285969	0.127679	0.092349	0.092461
8.35	0.653781	0.683404	0.646351	0.513506	0.30493	0.124469	0.098435	0.101678
8.46666	0.677716	0.671776	0.655225	0.527604	0.305719	0.129244	0.095726	0.092583
8.58333	0.688835	0.696685	0.654856	0.531737	0.306337	0.136399	0.099557	0.095894
8.7	0.698498	0.703892	0.665416	0.545879	0.309918	0.138905	0.094889	0.09509
8.81666	0.693506	0.695172	0.678576	0.56067	0.321343	0.139932	0.09848	0.101321
8.93333	0.716126	0.710891	0.669581	0.559885	0.326436	0.133913	0.10077	0.098898
9.05	0.722952	0.707148	0.677932	0.547554	0.328685	0.136283	0.097367	0.094663
9.16666	0.736517	0.737321	0.678201	0.552776	0.337028	0.136082	0.097705	0.103
9.28333	0.74103	0.731886	0.703332	0.577599	0.333106	0.138132	0.097841	0.098575
9.4	0.739707	0.7457	0.697431	0.573172	0.343212	0.134024	0.101903	0.100295
9.51666	0.745203	0.724877	0.703709	0.592817	0.346043	0.139228	0.100038	0.097393
9.63333	0.756199	0.753692	0.702449	0.584487	0.356447	0.147239	0.100096	0.093608
9.75	0.767273	0.761695	0.715833	0.600614	0.360906	0.142055	0.102786	0.101026
9.86666	0.773672	0.767648	0.724024	0.597371	0.352018	0.148391	0.103189	0.096581
9.98333	0.756542	0.759418	0.727936	0.612876	0.363072	0.143395	0.102693	0.109067
10.1	0.765302	0.780085	0.733349	0.630617	0.366726	0.143537	0.103303	0.104703
10.2167	0.7864	0.788366	0.739678	0.637846	0.378945	0.151232	0.105889	0.104591
10.3333	0.778778	0.792654	0.759947	0.633128	0.37123	0.152199	0.103602	0.099381
10.45	0.783438	0.808229	0.756297	0.632112	0.368225	0.136614	0.10434	0.101292
10.5667	0.79546	0.810838	0.750377	0.638359	0.387628	0.150194	0.103298	0.10373
10.6833	0.802068	0.774869	0.759167	0.639018	0.377684	0.147688	0.108193	0.10186
10.8	0.81063	0.817296	0.766613	0.659402	0.399071	0.147741	0.108706	0.102673
10.9167	0.810672	0.830172	0.761691	0.656196	0.39948	0.152429	0.100984	0.103024
11.0333	0.823223	0.828379	0.764799	0.652448	0.402491	0.146268	0.102757	0.102997
11.15	0.824562	0.817447	0.772639	0.660984	0.407537	0.152127	0.106738	0.101833
11.2667	0.806811	0.840666	0.776046	0.687801	0.415436	0.1459	0.107726	0.108996
11.3833	0.838035	0.81343	0.786706	0.670677	0.420571	0.154824	0.103494	0.10012
11.5	0.825559	0.847392	0.816805	0.683686	0.428668	0.15112	0.105466	0.105759
11.6167	0.823843	0.840666	0.797422	0.681093	0.420986	0.154209	0.106179	0.102574
11.7333	0.850405	0.843829	0.823129	0.698364	0.420253	0.153745	0.110482	0.110464
11.85	0.859324	0.850562	0.830509	0.700251	0.429718	0.155342	0.108298	0.096676
11.9667	0.827452	0.848142	0.816825	0.717784	0.431357	0.153173	0.106585	0.103882
12.0833	0.849743	0.861853	0.81564	0.698597	0.444189	0.152099	0.10913	0.107999
12.2	0.849113	0.850683	0.815983	0.712841	0.448256	0.153933	0.106744	0.101326
12.3167	0.878069	0.85431	0.808279	0.694574	0.444514	0.147687	0.107498	0.107097
12.4333	0.855698	0.888502	0.833798	0.724212	0.460479	0.158062	0.108395	0.108291
12.55	0.862409	0.893811	0.820499	0.723061	0.451379	0.157056	0.104372	0.107322
12.6667	0.877933	0.869651	0.840278	0.701274	0.463369	0.16011	0.107507	0.099156
12.7833	0.860524	0.885183	0.833309	0.717426	0.466653	0.162687	0.111641	0.109195
12.9	0.868888	0.893902	0.862114	0.733716	0.460723	0.160597	0.113195	0.102267
13.0167	0.88833	0.900374	0.838066	0.735034	0.473487	0.160512	0.112453	0.102692
13.1333	0.898559	0.887824	0.851158	0.711433	0.457773	0.15827	0.109434	0.114138
13.25	0.896118	0.883545	0.846702	0.731136	0.48165	0.16708	0.107625	0.109401
13.3667	0.879116	0.918108	0.846595	0.749556	0.481759	0.156252	0.111617	0.108533
13.4833	0.914529	0.900373	0.855992	0.769232	0.463799	0.154605	0.114198	0.108737
13.6	0.880182	0.884845	0.871269	0.755498	0.484176	0.156161	0.106099	0.106584
13.7167	0.897644	0.894702	0.87041	0.744701	0.490996	0.164305	0.108942	0.106399
13.8333	0.911091	0.916839	0.8734	0.747062	0.485631	0.15582	0.10722	0.111846
13.95	0.90852	0.913322	0.871448	0.754421	0.496199	0.163231	0.112765	0.107914
14.0667	0.918449	0.897303	0.866513	0.791176	0.502555	0.158517	0.113744	0.103911
14.1833	0.918023	0.894816	0.865473	0.767538	0.49702	0.161401	0.115481	0.114077
14.3	0.937313	0.901547	0.863692	0.769798	0.508163	0.156798	0.113266	0.107833
14.4167	0.929329	0.904492	0.860784	0.779399	0.498382	0.158236	0.11235	0.110343
14.5333	0.913887	0.906717	0.881406	0.764927	0.512347	0.16214	0.109239	0.105563
14.65	0.946549	0.917016	0.901833	0.773203	0.516511	0.164138	0.113357	0.107638
14.7667	0.932231	0.919021	0.875317	0.77202	0.514708	0.168264	0.111067	0.109114
14.8833	0.956004	0.920713	0.879812	0.794624	0.517662	0.160447	0.117167	0.109415
15	0.915911	0.929971	0.887605	0.78259	0.52853	0.163449	0.110275	0.112442
15.1167	0.933199	0.924415	0.909686	0.804618	0.528933	0.168267	0.109873	0.108182
15.2333	0.965924	0.925003	0.905804	0.804376	0.523809	0.168676	0.11248	0.11317
15.35	0.912304	0.936989	0.895486	0.793979	0.529835	0.170773	0.113187	0.10532
15.4667	0.932941	0.951337	0.891535	0.818533	0.530211	0.165854	0.121423	0.114821
15.5833	0.933115	0.921829	0.884757	0.822587	0.535922	0.168196	0.110367	0.110735
15.7	0.932001	0.925306	0.905495	0.806412	0.55077	0.167747	0.11115	0.115126
15.8167	0.939023	0.916935	0.919798	0.808544	0.547899	0.166072	0.122151	0.111061
15.9333	0.959017	0.950299	0.903601	0.82799	0.546187	0.170125	0.115798	0.108651
16.05	0.929718	0.94096	0.892361	0.820962	0.548995	0.17072	0.11578	0.106961
16.1667	0.941536	0.933204	0.896116	0.818612	0.560173	0.167034	0.116103	0.115115
16.2833	0.950202	0.935265	0.905461	0.822274	0.555641	0.171373	0.109008	0.109865
16.4	0.949785	0.950285	0.910285	0.844769	0.549605	0.167449	0.114455	0.11188
16.5167	0.929289	0.925322	0.90093	0.833893	0.559401	0.1719	0.116087	0.112181
16.6333	0.931108	0.920097	0.87824	0.830116	0.570062	0.168401	0.118804	0.110602
16.75	0.956251	0.951715	0.899023	0.844928	0.569121	0.170634	0.11333	0.11016
16.8667	0.945382	0.938353	0.923113	0.811298	0.567209	0.1686	0.11113	0.113862
16.9833	0.92773	0.953727	0.929128	0.835202	0.568518	0.178112	0.113824	0.108057
17.1	0.95719	0.923939	0.915407	0.840575	0.566038	0.173127	0.113455	0.109236
17.2167	0.957569	0.938131	0.916867	0.826059	0.581904	0.176097	0.114659	0.113692
17.3333	0.957047	0.955933	0.909651	0.839052	0.576081	0.173745	0.109248	0.108645
17.45	0.945061	0.934335	0.92757	0.832999	0.591725	0.176897	0.111797	0.10823
17.5667	0.936572	0.946359	0.931426	0.852062	0.584834	0.169688	0.115435	0.112773
17.6833	0.925169	0.916792	0.91083	0.851463	0.579582	0.176904	0.11539	0.10669
17.8	0.974086	0.954207	0.908533	0.837508	0.591656	0.1737	0.117056	0.110906
17.9167	0.954294	0.950804	0.930181	0.858841	0.564491	0.178894	0.116973	0.110961
18.0333	0.984109	0.974728	0.913056	0.845553	0.590487	0.184276	0.118045	0.113954
18.15	0.959228	0.963301	0.925642	0.849355	0.586532	0.178107	0.117321	0.106179
18.2667	0.956635	0.960964	0.928423	0.859802	0.589017	0.184708	0.111744	0.111664
18.3833	0.963878	0.986551	0.919281	0.88017	0.593195	0.174152	0.118803	0.102997
18.5	0.976997	0.975177	0.912472	0.83814	0.600704	0.182438	0.110393	0.110889
18.6167	0.922997	0.944482	0.925417	0.841497	0.603431	0.175577	0.112478	0.111591
18.7333	0.939457	0.952537	0.909009	0.825633	0.614119	0.170937	0.115519	0.114048
18.85	0.943942	0.962036	0.92679	0.850858	0.602049	0.184975	0.116074	0.110065
18.9667	0.936226	0.971743	0.90341	0.855387	0.615354	0.193753	0.114641	0.109448
19.0833	0.95362	0.965524	0.900271	0.841596	0.605385	0.186775	0.109783	0.112326
19.2	0.950588	0.958427	0.912118	0.868797	0.62201	0.177614	0.112128	0.108204
19.3167	0.949377	0.96397	0.919095	0.86311	0.597546	0.183753	0.116941	0.112594
19.4333	0.962139	0.978691	0.923437	0.836009	0.623695	0.183376	0.121214	0.111237
19.55	0.969737	0.962328	0.925492	0.86474	0.60782	0.181992	0.121526	0.110179
19.6667	0.972383	0.970945	0.920549	0.833627	0.616927	0.187207	0.120036	0.111725
19.7833	0.957359	0.975964	0.934119	0.851189	0.606143	0.177035	0.11581	0.116643
19.9	0.99457	0.977475	0.910105	0.850085	0.631095	0.177981	0.114911	0.109091
20.0167	0.962233	0.96889	0.91354	0.867015	0.638036	0.182244	0.11506	0.109694
20.1333	0.976519	0.97977	0.919459	0.87589	0.620848	0.182063	0.114192	0.109473
20.25	0.987346	0.96518	0.922115	0.869605	0.634687	0.182355	0.114889	0.104905
20.3667	0.973468	0.963076	0.902684	0.864851	0.619586	0.183926	0.113377	0.113565
20.4833	0.991323	0.9436	0.922639	0.871507	0.636672	0.186249	0.118302	0.108744
20.6	0.928098	0.954038	0.93102	0.867988	0.62233	0.191666	0.114314	0.108285
20.7167	0.978244	0.95914	0.941692	0.886208	0.617837	0.18234	0.119207	0.111611
20.8333	0.943326	0.938225	0.933383	0.872939	0.621598	0.188304	0.113717	0.106089
20.95	0.965903	0.981581	0.948019	0.873352	0.629701	0.196934	0.118888	0.105282
21.0667	0.964433	0.974886	0.933862	0.847384	0.642991	0.191862	0.109609	0.111244
21.1833	0.954095	0.959277	0.910167	0.864136	0.637453	0.192957	0.119302	0.104968
21.3	0.960823	0.971198	0.929149	0.852284	0.62439	0.181114	0.115719	0.113283
21.4167	0.970219	0.947116	0.947166	0.889354	0.639076	0.187863	0.112904	0.113567
21.5333	0.966784	0.978761	0.932533	0.866491	0.65189	0.190891	0.110606	0.110599
21.65	0.967035	0.971348	0.946529	0.869776	0.662893	0.190696	0.122937	0.109385
21.7667	0.955003	0.955892	0.917835	0.867297	0.65184	0.185768	0.11919	0.108749
21.8833	0.971764	0.974105	0.948875	0.849929	0.642022	0.193458	0.11457	0.106202
22	0.966382	0.964017	0.952153	0.876023	0.636854	0.181983	0.112582	0.109754
22.1167	0.970767	0.95896	0.91104	0.886269	0.644662	0.191949	0.1183	0.107489
22.2333	0.962019	0.977876	0.935889	0.88678	0.651563	0.197582	0.118792	0.106097
22.35	0.971957	0.975551	0.915647	0.868638	0.656669	0.197103	0.116891	0.11127
22.4667	0.979829	0.964381	0.939552	0.873251	0.644116	0.199054	0.119083	0.107251
22.5833	0.969689	0.971272	0.931583	0.867471	0.662651	0.190511	0.120149	0.102935
22.7	0.945459	0.940956	0.898397	0.873266	0.663627	0.189496	0.11599	0.106358
22.8167	0.97383	0.949003	0.935336	0.88476	0.662531	0.201193	0.116487	0.107754
22.9333	0.990705	0.959554	0.921842	0.862734	0.659623	0.191918	0.116474	0.105609
23.05	0.962817	0.942578	0.942031	0.882493	0.670588	0.193018	0.118719	0.107982
23.1667	0.976289	0.959484	0.947965	0.862682	0.66985	0.194905	0.119034	0.111409
23.2833	0.951206	0.976927	0.914666	0.862042	0.657872	0.196867	0.118508	0.105886
23.4	0.949486	0.954581	0.924892	0.878259	0.666431	0.195759	0.117467	0.107259
23.5167	0.959846	0.953872	0.915794	0.87949	0.669363	0.198814	0.108671	0.112587
23.6333	0.959792	0.947777	0.938328	0.873191	0.665791	0.199838	0.113142	0.108165
23.75	0.974766	0.968639	0.927881	0.877181	0.670247	0.203723	0.121338	0.10935
23.8667	0.957841	0.95054	0.920914	0.87613	0.661326	0.203393	0.118227	0.108303
23.9833	0.957059	0.972328	0.897141	0.886188	0.664059	0.188859	0.117938	0.107352
24.1	0.95021	0.916768	0.937798	0.85025	0.681182	0.20033	0.115947	0.11015
24.2167	0.949637	0.970025	0.938334	0.884692	0.661068	0.200372	0.114882	0.106013
24.3333	0.960605	0.946938	0.933795	0.875359	0.672135	0.193406	0.122853	0.11217
24.45	0.967964	0.943989	0.892736	0.851999	0.684452	0.200114	0.114274	0.110199
24.5667	0.949775	0.955281	0.904434	0.891437	0.683622	0.202867	0.117326	0.112917
24.6833	0.94905	0.981875	0.930112	0.864351	0.675973	0.201339	0.118005	0.105834
24.8	0.954754	0.944216	0.924259	0.891013	0.67823	0.205542	0.111509	0.105371
24.9167	0.955943	0.932648	0.914126	0.872083	0.679498	0.205222	0.118539	0.10382
25.0333	0.956779	0.95368	0.934554	0.890769	0.685646	0.211691	0.120468	0.106919
25.15	0.958737	0.946444	0.922162	0.871726	0.680977	0.213586	0.11655	0.104189
25.2667	0.964848	0.941233	0.919555	0.864172	0.70553	0.214023	0.116271	0.10861
25.3833	0.951664	0.94118	0.926492	0.863581	0.690474	0.207283	0.115382	0.099719
25.5	0.95102	0.943666	0.920517	0.872233	0.668315	0.212278	0.115032	0.105907
25.6167	0.937393	0.938929	0.917079	0.85502	0.676098	0.214165	0.114011	0.105875
25.7333	1	0.940312	0.896474	0.867793	0.677354	0.204038	0.111284	0.107069
25.85	0.968901	0.913696	0.928921	0.878397	0.679172	0.208979	0.115109	0.108444
25.9667	0.968408	0.956219	0.914749	0.876781	0.684426	0.212122	0.112575	0.106833
26.0833	0.945618	0.947964	0.921461	0.858282	0.681201	0.203449	0.1152	0.110735
26.2	0.950446	0.940304	0.929089	0.876775	0.689625	0.20165	0.111204	0.104791
26.3167	0.937041	0.939509	0.926741	0.878116	0.685255	0.210204	0.117588	0.103475
26.4333	0.965346	0.940885	0.916387	0.866412	0.704708	0.207424	0.116887	0.110019
26.55	0.963508	0.932522	0.913583	0.884225	0.676154	0.211578	0.114275	0.108898
26.6667	0.96386	0.926467	0.910972	0.875568	0.686008	0.216056	0.116995	0.106518
26.7833	0.963491	0.951835	0.919012	0.872195	0.699729	0.21983	0.114289	0.109722
26.9	0.931429	0.95659	0.901619	0.872957	0.683153	0.207551	0.117131	0.106182
27.0167	0.960842	0.92907	0.948908	0.859774	0.700039	0.21904	0.112368	0.10237
27.1333	0.930758	0.933796	0.919737	0.880738	0.686894	0.208439	0.110667	0.105733
27.25	0.946482	0.933741	0.920086	0.852404	0.692283	0.220523	0.117884	0.107642
27.3667	0.934762	0.926308	0.918673	0.876954	0.695047	0.228021	0.118764	0.103
27.4833	0.941613	0.94515	0.894055	0.872978	0.690997	0.214129	0.116439	0.105484
27.6	0.929694	0.957476	0.92276	0.867188	0.687845	0.227245	0.113786	0.107144
27.7167	0.959392	0.957399	0.925013	0.888512	0.691994	0.223398	0.116044	0.103295
27.8333	0.925557	0.912049	0.923175	0.885072	0.7039	0.218579	0.109609	0.100843
27.95	0.956827	0.904092	0.89395	0.878693	0.68163	0.221528	0.113529	0.101513
28.0667	0.952682	0.908965	0.909129	0.875892	0.688472	0.22448	0.112394	0.104807
28.1833	0.945886	0.90852	0.900105	0.886561	0.663392	0.22331	0.117683	0.11118
28.3	0.929547	0.900644	0.88739	0.860462	0.688463	0.22511	0.115034	0.10404
28.4167	0.933022	0.953939	0.88438	0.871266	0.689689	0.225875	0.116726	0.110875
28.5333	0.94865	0.920312	0.885488	0.863438	0.674176	0.228088	0.116863	0.103136
28.65	0.927065	0.924073	0.895527	0.869604	0.677749	0.225288	0.11196	0.107153
28.7667	0.950757	0.912174	0.903357	0.864697	0.694417	0.220466	0.110091	0.102509
28.8833	0.902858	0.919696	0.914277	0.872937	0.702288	0.229072	0.109691	0.1061
29	0.949528	0.898335	0.875844	0.865771	0.704619	0.22442	0.119845	0.103317
29.1167	0.923829	0.91377	0.923027	0.871703	0.69726	0.224113	0.114812	0.104316
29.2333	0.932045	0.923696	0.901584	0.870553	0.692223	0.236185	0.112096	0.106203
29.35	0.952165	0.930702	0.927015	0.865438	0.681933	0.230631	0.109862	0.10364
29.4667	0.918521	0.934868	0.896973	0.848228	0.685081	0.229243	0.109443	0.105288
29.5833	0.941428	0.924349	0.901613	0.868306	0.690576	0.231339	0.117162	0.108862
29.7	0.925431	0.921351	0.889346	0.840133	0.709675	0.233715	0.112443	0.103446
29.8167	0.941514	0.908588	0.904234	0.846087	0.696038	0.234025	0.115188	0.103551
29.9333	0.928759	0.883797	0.903598	0.869188	0.695381	0.228084	0.108585	0.106426
30.05	0.927984	0.946449	0.897961	0.851574	0.708152	0.236391	0.115351	0.104257
30.1667	0.916962	0.893024	0.903062	0.85732	0.703663	0.231855	0.119565	0.101523
30.2833	0.907676	0.893954	0.889703	0.862483	0.709918	0.23446	0.119002	0.10451
30.4	0.934406	0.920366	0.890219	0.863561	0.694748	0.230422	0.114826	0.102577
30.5167	0.919422	0.915896	0.870377	0.867545	0.68034	0.229619	0.107895	0.102275

[truncated: 6 more sheets: DDLD primary data n2, DDLD primary data n3, DDDL primary data n1, DDDL primary data n2, DDDL primary data n3, position variants amplitudes]
