# Supplementary material for: Towards a molecular mechanism underlying mitochondrial protein import through the TOM and TIM23 complexes
Source: eLife. 2022 Jun 8;11:e75426. doi: 10.7554/eLife.75426 (PMC9255969; doi:10.7554/eLife.75426)
Supplement: Figure 4—figure supplement 1—source data 3. [file elife-75426-fig4-figsupp1-data3.xlsx]

## Sheet: Sheet1
	Acp1-pep86				Mrp21-pep86
time	control	-ATP	AA	AA-ATP	control	-ATP	AA	AA-ATP
0	0.0293241	0.0075626	0.034995	0.0064116	0.0424481	0.0279113	0.0379876	0.0247895
0.116667	0.0637427	0.0138568	0.0675972	0.009533	0.0640483	0.0394398	0.060356	0.034848
0.233333	0.100852	0.025312	0.107792	0.0122549	0.0937006	0.0545583	0.0792459	0.0424942
0.35	0.145678	0.0443928	0.154966	0.0146903	0.122941	0.068066	0.0932096	0.048676
0.466667	0.20236	0.0673778	0.203591	0.0176795	0.144909	0.0834576	0.116697	0.0547944
0.583333	0.244908	0.100249	0.25336	0.0204261	0.174945	0.100622	0.137344	0.0589919
0.7	0.295767	0.125244	0.292252	0.0224145	0.214636	0.116285	0.160143	0.0632184
0.816667	0.33905	0.169956	0.33304	0.0254521	0.237723	0.13226	0.182374	0.0664395
0.933333	0.38549	0.20379	0.38024	0.0280845	0.271452	0.151131	0.199685	0.0665722
1.05	0.42302	0.243981	0.434652	0.0294163	0.304587	0.168904	0.233767	0.0720907
1.16667	0.457337	0.272545	0.444421	0.0332144	0.324022	0.1952	0.254887	0.0732592
1.28333	0.515216	0.306188	0.482986	0.0349104	0.350728	0.213864	0.263148	0.0773189
1.4	0.533435	0.336146	0.506782	0.0366668	0.381555	0.235006	0.296738	0.0797364
1.51667	0.566726	0.367832	0.537228	0.0387075	0.393678	0.255605	0.327897	0.0778763
1.63333	0.581062	0.390011	0.550434	0.0400318	0.42731	0.274183	0.336631	0.082127
1.75	0.584796	0.419808	0.588594	0.0422826	0.455888	0.30071	0.355879	0.0811192
1.86667	0.609268	0.438347	0.588705	0.0440242	0.476409	0.310364	0.377363	0.0813467
1.98333	0.650564	0.467094	0.614751	0.0439848	0.488672	0.325277	0.391697	0.08923
2.1	0.649251	0.490503	0.643201	0.0450126	0.508884	0.345228	0.40316	0.0863752
2.21667	0.683762	0.511827	0.6422	0.0466355	0.538596	0.373925	0.422838	0.0921709
2.33333	0.689888	0.52895	0.662478	0.0484618	0.545742	0.388733	0.444375	0.0931731
2.45	0.699399	0.546863	0.691679	0.0517901	0.563278	0.401736	0.457847	0.0912391
2.56667	0.734558	0.555044	0.684952	0.052413	0.583135	0.422952	0.474464	0.0935734
2.68333	0.739742	0.586096	0.686591	0.0531018	0.589611	0.448005	0.485726	0.0932567
2.8	0.748083	0.615097	0.712839	0.0538958	0.616811	0.466094	0.500677	0.0942276
2.91667	0.760466	0.624663	0.748141	0.0528877	0.624725	0.476696	0.494138	0.0971492
3.03333	0.772428	0.624092	0.74318	0.0591524	0.659007	0.510513	0.523094	0.0995003
3.15	0.771724	0.649384	0.727568	0.0566414	0.645332	0.497791	0.534324	0.100478
3.26667	0.807974	0.654036	0.747175	0.0598197	0.676763	0.511184	0.543974	0.0991401
3.38333	0.807889	0.671903	0.752447	0.0578945	0.670291	0.530047	0.560104	0.0942671
3.5	0.800437	0.670438	0.758441	0.0613025	0.68896	0.550001	0.560648	0.102167
3.61667	0.809653	0.695291	0.767826	0.0635004	0.718528	0.574194	0.570882	0.0956296
3.73333	0.844774	0.702947	0.781247	0.0621834	0.705902	0.577217	0.5798	0.100053
3.85	0.814356	0.722738	0.774919	0.0610947	0.731198	0.589484	0.591163	0.100978
3.96667	0.835888	0.714649	0.800587	0.0637024	0.732113	0.602226	0.595196	0.106084
4.08333	0.844274	0.725216	0.796735	0.0685995	0.752856	0.627192	0.597603	0.10748
4.2	0.872234	0.733625	0.799563	0.0690997	0.738811	0.61475	0.608799	0.10734
4.31667	0.864771	0.746876	0.82581	0.0672551	0.75056	0.645624	0.626192	0.105651
4.43333	0.864616	0.737392	0.821724	0.070853	0.769294	0.639613	0.607534	0.110944
4.55	0.872479	0.758393	0.813817	0.0698646	0.760503	0.652127	0.623371	0.110955
4.66667	0.885761	0.778465	0.821949	0.0697101	0.779493	0.661075	0.64087	0.110934
4.78333	0.893767	0.769892	0.830403	0.0722878	0.788586	0.68213	0.637172	0.108393
4.9	0.888066	0.803191	0.835447	0.0779672	0.790099	0.696506	0.652085	0.10678
5.01667	0.921413	0.775358	0.832943	0.0750375	0.801755	0.694721	0.636753	0.110637
5.13333	0.923127	0.79036	0.863789	0.0739596	0.806735	0.690703	0.673656	0.106512
5.25	0.906863	0.815704	0.855563	0.0766251	0.821909	0.714816	0.672721	0.108429
5.36667	0.933132	0.810473	0.855649	0.0754992	0.821314	0.725129	0.660516	0.119438
5.48333	0.915028	0.826463	0.87767	0.0760465	0.806764	0.73195	0.6703	0.10786
5.6	0.92126	0.823789	0.840154	0.0788678	0.815946	0.733988	0.674659	0.112921
5.71667	0.900918	0.82873	0.866958	0.0816117	0.841298	0.737162	0.677992	0.116845
5.83333	0.937522	0.833509	0.878294	0.0775489	0.821714	0.758214	0.67534	0.115852
5.95	0.908046	0.843835	0.851801	0.0846211	0.839186	0.7572	0.698671	0.115654
6.06667	0.934306	0.850568	0.842805	0.0774822	0.848191	0.767466	0.690309	0.112379
6.18333	0.92063	0.857105	0.891932	0.0811401	0.818384	0.754915	0.713327	0.118161
6.3	0.940841	0.853625	0.866055	0.0866489	0.835672	0.794562	0.706446	0.112688
6.41667	0.936725	0.864931	0.870986	0.0915939	0.868987	0.785193	0.702459	0.110602
6.53333	0.951639	0.835452	0.881292	0.0867407	0.872639	0.808054	0.715075	0.115166
6.65	0.940586	0.885058	0.891215	0.0902719	0.872156	0.779154	0.7352	0.116993
6.76667	0.920368	0.875512	0.878973	0.0882427	0.866163	0.800463	0.716345	0.115882
6.88333	0.955643	0.869084	0.878056	0.0906552	0.885895	0.807373	0.719966	0.119355
7	0.971624	0.859874	0.869348	0.0855898	0.884767	0.823479	0.719573	0.112633
7.11667	0.947477	0.892134	0.880318	0.0936355	0.890071	0.816449	0.71983	0.112766
7.23333	0.983495	0.875379	0.886737	0.0971139	0.890811	0.812324	0.737624	0.114055
7.35	0.952236	0.893475	0.882784	0.0975397	0.911103	0.80614	0.747718	0.12164
7.46667	0.948901	0.864512	0.898227	0.0984802	0.900793	0.8278	0.715187	0.125655
7.58333	0.97573	0.917498	0.926576	0.100427	0.898189	0.84065	0.741778	0.11947
7.7	0.955458	0.892949	0.889955	0.103542	0.902117	0.849345	0.709896	0.117214
7.81667	0.955587	0.883829	0.893804	0.101973	0.911815	0.832142	0.724675	0.117456
7.93333	0.969627	0.905339	0.876077	0.0991896	0.900513	0.844518	0.737931	0.124353
8.05	0.953278	0.896584	0.868	0.10191	0.907887	0.842336	0.7479	0.123288
8.16667	0.955883	0.887122	0.882992	0.102835	0.909926	0.853293	0.750652	0.120268
8.28333	0.976578	0.901274	0.888579	0.104336	0.920439	0.852738	0.74515	0.12431
8.4	0.988143	0.903311	0.880342	0.115191	0.907899	0.858441	0.741503	0.117044
8.51667	0.942302	0.915284	0.884275	0.0973427	0.900292	0.890983	0.748788	0.117823
8.63333	0.948765	0.904288	0.876984	0.10021	0.917406	0.834812	0.755003	0.124127
8.75	1	0.898998	0.908047	0.107034	0.915551	0.882872	0.775458	0.11553
8.86667	0.987141	0.916734	0.882836	0.108471	0.930876	0.859294	0.761567	0.124185
8.98333	0.982705	0.906647	0.877981	0.110093	0.90876	0.855379	0.787191	0.12308
9.1	0.966811	0.931919	0.891783	0.11297	0.947744	0.884249	0.753741	0.12381
9.21667	0.94428	0.925208	0.886602	0.11099	0.931974	0.879866	0.744096	0.122429
9.33333	0.955328	0.90353	0.893409	0.109408	0.928043	0.886847	0.77003	0.123711
9.45	0.960846	0.891531	0.875152	0.118992	0.932896	0.874951	0.779835	0.12176
9.56667	0.972157	0.910272	0.889206	0.113963	0.946173	0.896059	0.76752	0.127477
9.68333	0.981503	0.917378	0.868463	0.116623	0.9335	0.876943	0.755171	0.124598
9.8	0.973529	0.92567	0.896283	0.11766	0.938336	0.925386	0.780287	0.121573
9.91667	0.95628	0.922019	0.872607	0.116963	0.958038	0.888258	0.763905	0.130154
10.0333	0.968828	0.903491	0.895665	0.119647	0.936164	0.901407	0.769244	0.123819
10.15	0.955934	0.92385	0.866435	0.118681	0.919716	0.892894	0.777772	0.126184
10.2667	0.959251	0.90586	0.873181	0.118045	0.940193	0.910622	0.779862	0.125225
10.3833	0.943859	0.957241	0.88878	0.114907	0.963083	0.898027	0.758548	0.132456
10.5	0.999081	0.906316	0.880323	0.124156	0.957962	0.900432	0.780517	0.124911
10.6167	0.96318	0.914018	0.880403	0.120228	0.969725	0.911098	0.782037	0.129357
10.7333	0.965171	0.926605	0.898961	0.119696	0.924791	0.880381	0.755782	0.125807
10.85	0.956098	0.912414	0.864707	0.124156	0.957258	0.904841	0.753957	0.131934
10.9667	0.960952	0.935781	0.890598	0.124939	0.944661	0.905841	0.772402	0.129546
11.0833	0.967878	0.900542	0.889436	0.124593	0.966061	0.894177	0.795462	0.124874
11.2	0.973818	0.923889	0.888879	0.120549	0.948777	0.895501	0.776161	0.128406
11.3167	0.94886	0.924577	0.883981	0.131305	0.959847	0.922842	0.763669	0.132739
11.4333	0.954201	0.928145	0.862585	0.126049	0.948219	0.921965	0.777008	0.13305
11.55	0.973391	0.935268	0.881696	0.131115	0.946965	0.909955	0.806796	0.125328
11.6667	0.985674	0.919738	0.865584	0.136304	0.959168	0.907048	0.76883	0.130698
11.7833	0.985226	0.920495	0.870892	0.130357	0.940676	0.922255	0.785581	0.130259
11.9	0.966077	0.914964	0.861608	0.129273	0.940578	0.917629	0.752021	0.125658
12.0167	0.940689	0.914813	0.853745	0.130955	0.950963	0.900975	0.779111	0.127219
12.1333	0.944986	0.931602	0.86866	0.136624	0.950715	0.915453	0.785735	0.129882
12.25	0.954654	0.915626	0.851422	0.14401	0.967449	0.935815	0.803539	0.127845
12.3667	0.954767	0.954573	0.856547	0.136683	0.964704	0.939158	0.780572	0.133318
12.4833	0.958289	0.927948	0.855475	0.141641	1	0.912652	0.786857	0.134652
12.6	0.93566	0.911488	0.863036	0.136005	0.989567	0.901295	0.784871	0.12614
12.7167	0.940411	0.931897	0.863354	0.135381	0.941866	0.932541	0.771024	0.12686
12.8333	0.958946	0.935625	0.865829	0.142229	0.956495	0.927345	0.764174	0.13377
12.95	0.952756	0.921541	0.85948	0.138192	0.976196	0.94793	0.795279	0.130107
13.0667	0.926816	0.910394	0.845719	0.139691	0.951716	0.923677	0.775948	0.130556
13.1833	0.945738	0.88937	0.855838	0.143119	0.959456	0.953145	0.772735	0.132465
13.3	0.908853	0.915505	0.86265	0.146428	0.982679	0.931365	0.774271	0.128797
13.4167	0.938709	0.916674	0.850034	0.139416	0.972123	0.93149	0.781532	0.12598
13.5333	0.933267	0.908137	0.829943	0.140272	0.971381	0.935659	0.789301	0.134551
13.65	0.93153	0.921287	0.832743	0.145866	0.984928	0.941365	0.801719	0.130318
13.7667	0.928822	0.907675	0.855112	0.141599	0.949974	0.943236	0.785133	0.13405
13.8833	0.934822	0.901265	0.816523	0.141099	0.98955	0.943325	0.783765	0.135207
14	0.927618	0.887682	0.849332	0.145322	0.945858	0.944012	0.793683	0.134224
14.1167	0.913176	0.930255	0.823399	0.145862	0.978465	0.930274	0.776583	0.130665
14.2333	0.931206	0.928299	0.837237	0.145351	0.97833	0.926816	0.757625	0.139168
14.35	0.941454	0.926132	0.828534	0.145771	0.961692	0.958516	0.790763	0.13321
14.4667	0.933371	0.93225	0.821554	0.150989	0.997269	0.919899	0.795316	0.131853
14.5833	0.930504	0.916531	0.827309	0.152049	0.96856	0.923218	0.809581	0.133351
14.7	0.915367	0.888871	0.833005	0.145574	0.977234	0.930542	0.774258	0.128067
14.8167	0.915182	0.899972	0.834443	0.146298	0.979624	0.936359	0.779002	0.13573
14.9333	0.909157	0.945701	0.823707	0.146881	0.962315	0.94836	0.790582	0.133889
15.05	0.912473	0.934539	0.814227	0.143865	0.96403	0.943568	0.791782	0.134441
15.1667	0.919958	0.908136	0.807281	0.145615	0.961113	0.952137	0.800069	0.137779
15.2833	0.890127	0.91742	0.83319	0.147042	0.948586	0.958911	0.759265	0.130238
15.4	0.914236	0.906103	0.805956	0.14885	0.99061	0.941471	0.789488	0.13468
15.5167	0.916314	0.886939	0.81829	0.150911	0.990537	0.944675	0.772088	0.133922
15.6333	0.938853	0.888331	0.822403	0.154367	0.96448	0.96997	0.784979	0.14252
15.75	0.928156	0.921466	0.809504	0.153124	0.954399	0.943386	0.783015	0.137616
15.8667	0.897083	0.930577	0.808874	0.153361	0.974128	0.949969	0.788706	0.134158
15.9833	0.913604	0.923218	0.817089	0.154924	0.965801	0.938571	0.785608	0.131057
16.1	0.901916	0.911348	0.814206	0.150979	0.969145	0.957913	0.783772	0.134753
16.2167	0.910994	0.893911	0.7938	0.150244	0.972917	0.943211	0.776181	0.141564
16.3333	0.923946	0.897693	0.798785	0.155843	0.977742	0.933944	0.792667	0.133661
16.45	0.919997	0.887243	0.819051	0.151824	0.979225	0.941652	0.765969	0.136862
16.5667	0.915331	0.898746	0.826293	0.151821	0.969948	0.947818	0.78641	0.130977
16.6833	0.899648	0.886901	0.790021	0.157642	0.980589	0.95788	0.789158	0.13222
16.8	0.869255	0.916058	0.804996	0.15356	0.981279	0.936719	0.780865	0.131053
16.9167	0.894926	0.886481	0.797419	0.155654	0.966575	0.947102	0.763551	0.131126
17.0333	0.883216	0.896681	0.792657	0.152421	0.955892	0.953469	0.768878	0.134554
17.15	0.886147	0.903956	0.808624	0.153189	0.946689	0.938087	0.774461	0.139523
17.2667	0.895059	0.905111	0.797621	0.161258	0.947477	0.946003	0.777695	0.136219
17.3833	0.895355	0.910753	0.786625	0.156504	0.965341	0.944715	0.761644	0.136342
17.5	0.909056	0.929133	0.79056	0.151535	0.975698	0.951924	0.794015	0.128778
17.6167	0.903631	0.90724	0.822223	0.152102	0.939957	0.939804	0.818438	0.134157
17.7333	0.885252	0.894985	0.787495	0.160322	0.972136	0.937175	0.777918	0.135407
17.85	0.899694	0.900698	0.79916	0.161327	0.942897	0.932236	0.772872	0.132993
17.9667	0.903746	0.88388	0.790278	0.163127	0.97972	0.947966	0.776401	0.138874
18.0833	0.880541	0.868451	0.781932	0.161008	0.952172	0.943573	0.773967	0.133976
18.2	0.899472	0.883034	0.78791	0.166158	0.979781	0.916575	0.775802	0.138449
18.3167	0.884386	0.880146	0.788946	0.160117	0.967849	0.955037	0.770951	0.135605
18.4333	0.885495	0.87055	0.786248	0.156153	0.964158	0.918664	0.760428	0.142776
18.55	0.853589	0.884372	0.791247	0.15158	0.962944	0.927848	0.772203	0.140847
18.6667	0.857145	0.905529	0.771576	0.166312	0.964613	0.954555	0.773837	0.135672
18.7833	0.885772	0.872282	0.763256	0.160292	0.978004	0.948669	0.790396	0.136787
18.9	0.86862	0.870934	0.777521	0.159782	0.964146	0.948387	0.776903	0.138305
19.0167	0.883986	0.873347	0.774083	0.15953	0.950352	0.952976	0.762309	0.135644
19.1333	0.868406	0.859026	0.784155	0.154708	0.980691	0.947121	0.767026	0.130471
19.25	0.855687	0.885952	0.76169	0.163228	0.962793	0.943383	0.766331	0.136944
19.3667	0.856685	0.88216	0.773789	0.168749	0.955694	0.950427	0.775489	0.141609
19.4833	0.874915	0.872487	0.770829	0.162351	0.967123	0.94309	0.765685	0.135891
19.6	0.857467	0.896612	0.773841	0.16339	0.956757	0.930515	0.781271	0.141143
19.7167	0.867651	0.886686	0.762606	0.160988	0.951075	0.932797	0.762245	0.137884
19.8333	0.856943	0.878413	0.780724	0.158633	0.958033	0.947385	0.7837	0.138117
19.95	0.85304	0.878479	0.760457	0.165346	0.975087	0.931671	0.764075	0.13635
20.0667	0.849611	0.857022	0.7718	0.157746	0.966465	0.933901	0.76799	0.139473
20.1833	0.861629	0.853621	0.761598	0.167017	0.968403	0.944687	0.755817	0.138308
20.3	0.840733	0.86243	0.768698	0.165398	0.965667	0.916753	0.752331	0.141541
20.4167	0.850549	0.870362	0.757848	0.159113	0.940936	0.923096	0.772662	0.141687
20.5333	0.849392	0.867264	0.766136	0.164512	0.947519	0.936925	0.76715	0.142943
20.65	0.842761	0.846032	0.747284	0.160567	0.954732	0.941476	0.755506	0.142025
20.7667	0.853285	0.875031	0.743091	0.159853	0.934628	0.938259	0.765537	0.132354
20.8833	0.84448	0.854942	0.762565	0.162203	0.936304	0.90218	0.771842	0.134873
21	0.862718	0.859725	0.75905	0.165668	0.939638	0.91481	0.750233	0.134013
21.1167	0.852187	0.8488	0.766091	0.161843	0.94296	0.91318	0.769266	0.143529
21.2333	0.83023	0.861575	0.735144	0.162298	0.942732	0.922536	0.74618	0.142295
21.35	0.848702	0.858826	0.74461	0.163784	0.941015	0.920127	0.766893	0.141296
21.4667	0.843284	0.858723	0.726712	0.158102	0.936446	0.943827	0.755175	0.137476
21.5833	0.840125	0.853662	0.745498	0.162395	0.950031	0.91968	0.762908	0.14375
21.7	0.836229	0.852816	0.735622	0.166252	0.949012	0.92078	0.742926	0.140368
21.8167	0.859484	0.834358	0.758047	0.168616	0.944009	0.926328	0.761204	0.137544
21.9333	0.845052	0.859855	0.755545	0.164712	0.954497	0.932606	0.75977	0.134921
22.05	0.846178	0.858859	0.744183	0.164068	0.937386	0.911075	0.762102	0.13704
22.1667	0.811823	0.829897	0.727097	0.171273	0.962058	0.928019	0.752602	0.138446
22.2833	0.82255	0.841473	0.748075	0.16706	0.940776	0.924239	0.751243	0.136317
22.4	0.833666	0.846572	0.726636	0.163641	0.96657	0.908313	0.765639	0.143896
22.5167	0.841207	0.845245	0.736007	0.172802	0.930603	0.916976	0.734591	0.13517
22.6333	0.809866	0.830899	0.752698	0.168789	0.939598	0.921678	0.754102	0.135616
22.75	0.844984	0.846308	0.72426	0.171914	0.922431	0.907649	0.740278	0.134906
22.8667	0.814618	0.85008	0.729685	0.162364	0.917506	0.929861	0.751069	0.138515
22.9833	0.820618	0.842853	0.740252	0.163457	0.910978	0.920806	0.757591	0.13348
23.1	0.816681	0.860259	0.73005	0.168957	0.958681	0.886789	0.769671	0.134263
23.2167	0.838633	0.845387	0.70851	0.170127	0.94632	0.920496	0.748977	0.135072
23.3333	0.811015	0.847769	0.71237	0.163195	0.919256	0.902164	0.769596	0.135538
23.45	0.842727	0.855903	0.727328	0.165877	0.933475	0.893075	0.752249	0.136771
23.5667	0.819442	0.860721	0.712174	0.172577	0.933055	0.907299	0.752801	0.132664
23.6833	0.832247	0.842171	0.715808	0.165471	0.929036	0.913017	0.754878	0.141123
23.8	0.8155	0.855995	0.695892	0.167188	0.942757	0.910844	0.723774	0.132556
23.9167	0.827357	0.832314	0.704814	0.165244	0.932255	0.914736	0.744047	0.135366
24.0333	0.811295	0.804217	0.717128	0.169812	0.928252	0.911562	0.739831	0.13873
24.15	0.80622	0.825072	0.708479	0.166694	0.936077	0.882319	0.740847	0.140658
24.2667	0.800659	0.83071	0.714133	0.167808	0.90991	0.881032	0.729827	0.136935
24.3833	0.792387	0.82333	0.700845	0.165841	0.919439	0.898778	0.735413	0.137254
24.5	0.799577	0.832882	0.687575	0.166936	0.927952	0.893685	0.741269	0.136684
24.6167	0.801697	0.824618	0.694201	0.164614	0.94401	0.904086	0.724805	0.143064
24.7333	0.801051	0.837442	0.702136	0.166235	0.895325	0.915444	0.731419	0.140461
24.85	0.801386	0.831349	0.684797	0.170024	0.924746	0.875741	0.737851	0.136242
24.9667	0.785411	0.797424	0.693385	0.166897	0.916972	0.911839	0.746631	0.137494
25.0833	0.799147	0.829293	0.709916	0.167702	0.924027	0.885268	0.731889	0.140215
25.2	0.800981	0.808616	0.678731	0.16238	0.934932	0.898131	0.734882	0.132546
25.3167	0.795032	0.814713	0.694878	0.167999	0.903835	0.906843	0.741466	0.142029
25.4333	0.808228	0.827961	0.678194	0.165583	0.887865	0.896798	0.747598	0.131558
25.55	0.800595	0.801125	0.696174	0.167432	0.929337	0.871004	0.738954	0.136822
25.6667	0.785615	0.822498	0.710272	0.165185	0.913709	0.891275	0.729652	0.139607
25.7833	0.772596	0.81323	0.701197	0.167701	0.932393	0.895407	0.737255	0.138373
25.9	0.80001	0.827799	0.689604	0.165103	0.924102	0.871945	0.718925	0.134093
26.0167	0.774572	0.815515	0.692978	0.171863	0.905321	0.89131	0.726018	0.13383
26.1333	0.804507	0.81335	0.679172	0.168184	0.893877	0.877967	0.728213	0.136395
26.25	0.777592	0.813279	0.678728	0.163269	0.919182	0.862754	0.727948	0.139808
26.3667	0.764579	0.804309	0.682887	0.16613	0.911521	0.891847	0.736923	0.135922
26.4833	0.766375	0.801114	0.685785	0.16645	0.903733	0.900741	0.723967	0.135007
26.6	0.779554	0.806674	0.692395	0.170416	0.91076	0.897693	0.717156	0.138259
26.7167	0.780648	0.800325	0.680176	0.163817	0.913559	0.880436	0.716642	0.130264
26.8333	0.749308	0.806456	0.663353	0.168363	0.883109	0.866034	0.721639	0.134122
26.95	0.773009	0.789089	0.670662	0.166636	0.908688	0.908679	0.723799	0.130495
27.0667	0.751185	0.793993	0.663308	0.168887	0.903129	0.903211	0.708194	0.13455
27.1833	0.762364	0.791146	0.669547	0.163371	0.898064	0.864343	0.726021	0.14012
27.3	0.763878	0.799164	0.661511	0.1626	0.910808	0.842836	0.736448	0.129854
27.4167	0.754812	0.793331	0.685074	0.161493	0.905274	0.874903	0.708182	0.136563
27.5333	0.757262	0.816971	0.652554	0.159249	0.89495	0.881171	0.721749	0.141974
27.65	0.755329	0.797559	0.670048	0.166149	0.883516	0.848832	0.714065	0.13936
27.7667	0.769939	0.779273	0.664127	0.164737	0.905446	0.87114	0.703538	0.134352
27.8833	0.757684	0.797994	0.673466	0.161863	0.896121	0.887698	0.694504	0.135368
28	0.756984	0.786176	0.663021	0.161499	0.885564	0.863429	0.712779	0.138394
28.1167	0.755579	0.799984	0.665801	0.160984	0.897126	0.877748	0.693422	0.136452
28.2333	0.750962	0.787279	0.66434	0.172865	0.880932	0.861496	0.707856	0.137091
28.35	0.751612	0.802354	0.639676	0.15838	0.883665	0.876057	0.693924	0.138493
28.4667	0.769686	0.773567	0.657519	0.159187	0.90182	0.877031	0.69362	0.137773
28.5833	0.743244	0.776979	0.647955	0.163625	0.887186	0.874651	0.69379	0.137827
28.7	0.734095	0.789766	0.659462	0.168234	0.869418	0.860109	0.68877	0.135432
28.8167	0.727696	0.785649	0.668454	0.166235	0.872574	0.858793	0.692031	0.134123
28.9333	0.747452	0.774459	0.642407	0.16151	0.884486	0.871599	0.691207	0.134041
29.05	0.751802	0.784622	0.654167	0.163307	0.876889	0.842612	0.684611	0.142901
29.1667	0.763269	0.78229	0.636102	0.163124	0.869323	0.841714	0.695688	0.130378
29.2833	0.753093	0.765276	0.658076	0.165131	0.877665	0.833657	0.675779	0.133275
29.4	0.742385	0.745023	0.638479	0.166304	0.881198	0.843163	0.687988	0.133829
29.5167	0.749634	0.772549	0.650569	0.160699	0.855351	0.854502	0.698949	0.13154
29.6333	0.752105	0.78079	0.644967	0.161236	0.872784	0.846315	0.689973	0.134696
29.75	0.742529	0.776523	0.642076	0.158514	0.875268	0.840321	0.686997	0.132088
29.8667	0.731989	0.768872	0.632865	0.17041	0.875069	0.859697	0.695793	0.134859
29.9833	0.742151	0.758208	0.630148	0.167246	0.891788	0.842761	0.689439	0.12942
30.9	0.799577	0.832882	0.687575	0.166936	0.927952	0.893685	0.741269	0.136684
31.0167	0.801697	0.824618	0.694201	0.164614	0.94401	0.904086	0.724805	0.143064
31.1333	0.801051	0.837442	0.702136	0.166235	0.895325	0.915444	0.731419	0.140461
31.25	0.801386	0.831348	0.684797	0.170024	0.924746	0.875741	0.737851	0.136242
31.3667	0.785411	0.797424	0.693385	0.166896	0.916972	0.911839	0.746631	0.137494
31.4833	0.799147	0.829293	0.709916	0.167702	0.924027	0.885268	0.731889	0.140215
31.6	0.800981	0.808616	0.678731	0.16238	0.934932	0.898131	0.734882	0.132546
31.7167	0.795032	0.814713	0.694878	0.167999	0.903835	0.906843	0.741466	0.142029
31.8333	0.808228	0.827961	0.678194	0.165583	0.887865	0.896798	0.747598	0.131558
31.95	0.800595	0.801125	0.696174	0.167432	0.929337	0.871004	0.738954	0.136822
32.0667	0.785615	0.822498	0.710272	0.165185	0.913709	0.891275	0.729652	0.139607
32.1833	0.772596	0.81323	0.701197	0.167701	0.932393	0.895407	0.737256	0.138373
32.3	0.80001	0.827799	0.689604	0.165103	0.924102	0.871945	0.718925	0.134092
32.4167	0.774572	0.815514	0.692978	0.171863	0.905321	0.89131	0.726018	0.13383
32.5333	0.804507	0.81335	0.679172	0.168184	0.893877	0.877967	0.728213	0.136395
32.65	0.777592	0.813279	0.678728	0.163269	0.919182	0.862754	0.727948	0.139808
32.7667	0.764579	0.804309	0.682887	0.16613	0.911521	0.891847	0.736923	0.135922
32.8833	0.766375	0.801114	0.685785	0.16645	0.903733	0.900741	0.723967	0.135007
33	0.779553	0.806674	0.692395	0.170416	0.91076	0.897693	0.717156	0.138259
33.1167	0.780648	0.800325	0.680176	0.163817	0.913559	0.880436	0.716642	0.130264
33.2333	0.749308	0.806456	0.663353	0.168363	0.883109	0.866034	0.721639	0.134122
33.35	0.773009	0.789089	0.670662	0.166636	0.908688	0.908679	0.723798	0.130495
33.4667	0.751185	0.793993	0.663308	0.168887	0.903129	0.903211	0.708194	0.13455
33.5833	0.762364	0.791147	0.669547	0.163371	0.898064	0.864343	0.726021	0.14012
33.7	0.763878	0.799164	0.661511	0.1626	0.910808	0.842836	0.736448	0.129854
33.8167	0.754812	0.793331	0.685074	0.161493	0.905274	0.874904	0.708182	0.136563
33.9333	0.757262	0.816971	0.652554	0.159249	0.89495	0.881171	0.721749	0.141974
34.05	0.755329	0.797559	0.670048	0.166149	0.883516	0.848832	0.714065	0.13936
34.1667	0.769939	0.779273	0.664127	0.164737	0.905446	0.87114	0.703538	0.134352
34.2833	0.757684	0.797994	0.673466	0.161863	0.896121	0.887698	0.694504	0.135368
34.4	0.756984	0.786176	0.663021	0.161499	0.885564	0.863429	0.712779	0.138394
34.5167	0.755579	0.799984	0.665801	0.160984	0.897126	0.877748	0.693422	0.136452
34.6333	0.750963	0.787279	0.66434	0.172865	0.880932	0.861496	0.707856	0.137091
34.75	0.751612	0.802354	0.639676	0.15838	0.883665	0.876057	0.693924	0.138493
34.8667	0.769686	0.773567	0.657519	0.159187	0.90182	0.877031	0.69362	0.137773
34.9833	0.743244	0.776979	0.647955	0.163625	0.887187	0.874651	0.69379	0.137827
35.1	0.734095	0.789766	0.659462	0.168234	0.869418	0.860109	0.68877	0.135432
35.2167	0.727696	0.785649	0.668454	0.166235	0.872574	0.858793	0.692031	0.134123
35.3333	0.747451	0.774459	0.642407	0.16151	0.884486	0.871599	0.691207	0.134041
35.45	0.751802	0.784622	0.654167	0.163307	0.876889	0.842612	0.684611	0.142902
35.5667	0.763268	0.78229	0.636102	0.163124	0.869323	0.841714	0.695688	0.130378
35.6833	0.753093	0.765276	0.658076	0.165131	0.877665	0.833657	0.675779	0.133275
35.8	0.742385	0.745022	0.638479	0.166304	0.881198	0.843163	0.687988	0.133829
35.9167	0.749634	0.772549	0.650569	0.160699	0.855351	0.854502	0.698949	0.13154
36.0333	0.752105	0.78079	0.644967	0.161236	0.872784	0.846315	0.689973	0.134696
36.15	0.742528	0.776523	0.642076	0.158514	0.875268	0.840321	0.686997	0.132088
36.2667	0.731989	0.768872	0.632865	0.17041	0.875069	0.859697	0.695793	0.134859
36.3833	0.742151	0.758208	0.630148	0.167246	0.891788	0.842761	0.689439	0.12942
