# Supplementary material for: Towards a molecular mechanism underlying mitochondrial protein import through the TOM and TIM23 complexes
Source: eLife. 2022 Jun 8;11:e75426. doi: 10.7554/eLife.75426 (PMC9255969; doi:10.7554/eLife.75426)
Supplement: Figure 4—source data 1. [file elife-75426-fig4-data1.xlsx]

## Sheet: primary data n=1
time	L	DL	DDL	DDDL	LDDD	DLDD	DDLD	DDDL
0	0.0181303	0.00858485	0.00787848	0.0073513	0.00458206	0.00506756	0.00564683	0.00584687
0.1	0.0243918	0.0105935	0.00935582	0.00846608	0.00508632	0.00627611	0.00601356	0.00673036
0.2	0.0316931	0.0127752	0.0105394	0.00989133	0.00564683	0.00644906	0.0067637	0.00758676
0.3	0.0399758	0.0156715	0.0123918	0.0114958	0.00611567	0.00735964	0.00807226	0.00844108
0.4	0.0496338	0.018322	0.0134336	0.0127168	0.00669285	0.00815561	0.00851401	0.00914537
0.5	0.0588313	0.0219726	0.0160445	0.0130836	0.00740131	0.00847442	0.00959337	0.0104206
0.6	0.0680621	0.0251336	0.0174635	0.0150193	0.00783472	0.00941	0.0101101	0.0112812
0.7	0.07777	0.0285842	0.0184658	0.0164112	0.00916621	0.0101289	0.0109228	0.0124314
0.8	0.0884698	0.0326162	0.0210225	0.0174635	0.00937041	0.0105519	0.0120646	0.0130398
0.9	0.0988467	0.035498	0.0230374	0.0183449	0.0102185	0.012	0.0122022	0.0139066
1	0.109736	0.0407051	0.0251961	0.0202098	0.0110124	0.012348	0.0135607	0.0151423
1.1	0.122172	0.0451934	0.0276591	0.0208975	0.0117437	0.0128939	0.0136649	0.0159716
1.2	0.131277	0.048717	0.0291593	0.0227269	0.0127398	0.0129648	0.014663	0.0171718
1.3	0.143688	0.052726	0.0328558	0.0235896	0.0136795	0.0139566	0.015634	0.0186075
1.4	0.153175	0.0584562	0.0343519	0.0255441	0.0146505	0.0146234	0.0163842	0.0193701
1.5	0.165746	0.0633529	0.036944	0.0272007	0.0158799	0.0158445	0.0168113	0.0206432
1.6	0.175562	0.0683454	0.0397925	0.0287593	0.0167425	0.0163175	0.0184366	0.0216538
1.7	0.18665	0.0717231	0.0424325	0.0301387	0.018072	0.017053	0.0189138	0.0226561
1.8	0.197204	0.078541	0.045058	0.031416	0.0187658	0.017749	0.0195264	0.0236104
1.9	0.210366	0.082573	0.0480523	0.0331475	0.0202494	0.0183449	0.0208099	0.0247127
2	0.219039	0.0867737	0.050436	0.034354	0.0212329	0.01892	0.0219768	0.025094
2.1	0.228318	0.093329	0.0527989	0.0370857	0.0226707	0.0201515	0.0227186	0.0266005
2.2	0.236606	0.0976235	0.0576769	0.0387548	0.023425	0.0207974	0.0232562	0.0284405
2.3	0.248617	0.103247	0.0588875	0.0399737	0.025642	0.0216184	0.0245335	0.0290114
2.4	0.258954	0.107698	0.0623902	0.0407656	0.0261025	0.0226269	0.0249398	0.0304929
2.5	0.26785	0.112926	0.0649386	0.0434285	0.0278549	0.0232979	0.0265755	0.0317056
2.6	0.276191	0.117456	0.0674786	0.0439286	0.0289718	0.0239667	0.0274007	0.0328579
2.7	0.288559	0.121669	0.0704208	0.0459311	0.0306388	0.0251274	0.0281154	0.0340331
2.8	0.297705	0.128419	0.074134	0.047498	0.0321995	0.0257296	0.0286197	0.0354459
2.9	0.304781	0.132138	0.0770887	0.0489691	0.0322182	0.0257233	0.0304366	0.0366919
3	0.315537	0.137426	0.0809289	0.0510632	0.0343082	0.0269631	0.0307659	0.0367544
3.1	0.322951	0.142746	0.0841274	0.0529573	0.0364815	0.027484	0.0323057	0.0390423
3.2	0.33248	0.146878	0.0865799	0.0545513	0.0381401	0.0288426	0.0330975	0.04018
3.3	0.341035	0.150318	0.0884886	0.0573685	0.0391569	0.0296323	0.0341644	0.0415657
3.4	0.349314	0.156471	0.0921663	0.0590855	0.0402196	0.0299074	0.0353208	0.0417553
3.5	0.357261	0.161412	0.095792	0.0598231	0.0423179	0.0317994	0.0358043	0.0442224
3.6	0.366248	0.166461	0.0997239	0.0615526	0.0435473	0.0321474	0.03744	0.0454935
3.7	0.372193	0.170291	0.101597	0.0634321	0.04491	0.0326266	0.0378505	0.0459852
3.8	0.382653	0.172851	0.103948	0.0650157	0.0467895	0.0346749	0.0393757	0.0480127
3.9	0.388173	0.17923	0.107367	0.06801	0.0481544	0.0350479	0.0404217	0.0482169
4	0.396829	0.183501	0.110274	0.0691873	0.0498526	0.0357542	0.0412386	0.049365
4.1	0.404474	0.187046	0.112801	0.0714647	0.0523405	0.0372879	0.0419345	0.0525489
4.2	0.411214	0.192603	0.115983	0.0724774	0.0540137	0.0378567	0.0443849	0.053124
4.3	0.418822	0.196781	0.118617	0.0740777	0.0551535	0.0376838	0.0447121	0.054816
4.4	0.42574	0.20199	0.12103	0.0768553	0.057281	0.0386527	0.0451768	0.0548576
4.5	0.431726	0.20444	0.125187	0.0785993	0.0580394	0.0395487	0.0473396	0.0570059
4.6	0.437025	0.208366	0.126562	0.0792224	0.0599314	0.0413511	0.0493192	0.0582457
4.7	0.446312	0.213552	0.130225	0.0803455	0.062236	0.04237	0.0490108	0.0604128
4.8	0.455093	0.21881	0.13278	0.083296	0.0633216	0.0431639	0.051232	0.062359
4.9	0.456912	0.221254	0.135812	0.085511	0.0648657	0.0446558	0.0512216	0.0621277
5	0.464674	0.224536	0.138506	0.0860652	0.0671244	0.0452893	0.0523509	0.0639238
5.1	0.473821	0.22992	0.140414	0.0877635	0.0686997	0.0454497	0.0548305	0.0661867
5.2	0.476876	0.230295	0.144313	0.0905035	0.0702854	0.0459436	0.0546701	0.066243
5.3	0.482604	0.23759	0.144911	0.0921663	0.0717044	0.0476022	0.0566267	0.068135
5.4	0.489566	0.238759	0.150379	0.094623	0.0743778	0.0484961	0.0576206	0.0697894
5.5	0.495098	0.243699	0.151391	0.0944605	0.0752988	0.0505923	0.0599794	0.0711855
5.6	0.500326	0.247075	0.154611	0.0966067	0.0761947	0.0509403	0.0601065	0.072194
5.7	0.505602	0.250496	0.156907	0.0982091	0.0790765	0.0516508	0.0625423	0.0733526
5.8	0.514839	0.254539	0.159891	0.100555	0.0803851	0.0527448	0.0623652	0.0753383
5.9	0.51586	0.257452	0.162608	0.100807	0.0828501	0.0541617	0.0630507	0.0759822
6	0.520957	0.261655	0.165583	0.10337	0.0829772	0.0545888	0.0653637	0.0788973
6.1	0.524637	0.264095	0.170057	0.107006	0.0862215	0.0552931	0.0661867	0.0798558
6.2	0.531675	0.268389	0.169584	0.108069	0.087753	0.0565267	0.0676432	0.0812706
6.3	0.535814	0.272615	0.174016	0.109032	0.0897388	0.057481	0.0682392	0.0823
6.4	0.54076	0.272888	0.177063	0.110707	0.0916933	0.0589209	0.0697373	0.0837107
6.5	0.546605	0.277187	0.179253	0.111322	0.0927539	0.0601565	0.0714522	0.0860507
6.6	0.55414	0.280691	0.181072	0.114574	0.0940542	0.0603794	0.0723336	0.0858923
6.7	0.553221	0.283942	0.184722	0.116679	0.0958628	0.0615651	0.074632	0.0889678
6.8	0.557545	0.287349	0.185087	0.117677	0.0973047	0.06348	0.0753675	0.0898868
6.9	0.564496	0.291033	0.189936	0.118752	0.098607	0.0637717	0.0766782	0.0902993
7	0.569672	0.293535	0.192311	0.120878	0.100699	0.0649094	0.0770699	0.0912078
7.1	0.571018	0.296017	0.194107	0.121867	0.103989	0.0662784	0.0798912	0.0941208
7.2	0.576	0.300153	0.19447	0.12466	0.103643	0.0652699	0.0796016	0.0959045
7.3	0.58049	0.301524	0.198608	0.126081	0.106733	0.0681537	0.081529	0.0976131
7.4	0.585041	0.306523	0.200619	0.127743	0.10804	0.0678683	0.0828418	0.0987425
7.5	0.58736	0.310028	0.202884	0.128631	0.108142	0.0693623	0.0830689	0.0991009
7.6	0.588519	0.311547	0.205691	0.131671	0.111443	0.0705917	0.0863799	0.101326
7.7	0.596189	0.312991	0.206693	0.130869	0.113385	0.0721732	0.0867383	0.103131
7.8	0.599502	0.316964	0.211294	0.13349	0.115725	0.0726212	0.0880448	0.104371
7.9	0.601219	0.318638	0.212229	0.13622	0.11789	0.0732338	0.0899951	0.104427
8	0.609008	0.321615	0.213715	0.137756	0.11899	0.0747236	0.0902264	0.105837
8.1	0.609514	0.324053	0.21738	0.139264	0.119946	0.075703	0.0924143	0.108359
8.2	0.613152	0.329908	0.219633	0.138645	0.120646	0.0772428	0.092358	0.110272
8.3	0.616528	0.330984	0.222781	0.141525	0.122703	0.0765344	0.0958545	0.110195
8.4	0.618824	0.334276	0.222794	0.143828	0.124587	0.0780722	0.0970068	0.112397
8.5	0.62116	0.335657	0.225032	0.146093	0.126718	0.080308	0.0977423	0.113235
8.6	0.623779	0.337212	0.227288	0.146443	0.127808	0.0809102	0.0975194	0.113697
8.7	0.627317	0.341896	0.228515	0.149218	0.128764	0.0829022	0.0993009	0.117365
8.8	0.629539	0.344311	0.234131	0.150395	0.128852	0.0820875	0.10151	0.116989
8.9	0.633894	0.344769	0.23511	0.150727	0.131767	0.0841503	0.101931	0.11719
9	0.637602	0.348162	0.236163	0.152273	0.134022	0.0838523	0.103512	0.120501
9.1	0.641128	0.349604	0.236909	0.155475	0.133703	0.0857173	0.104418	0.121886
9.2	0.642489	0.354338	0.240407	0.15609	0.135416	0.0872238	0.106331	0.123764
9.3	0.644883	0.355755	0.24017	0.157622	0.138156	0.0878551	0.109828	0.125849
9.4	0.647125	0.357165	0.244297	0.159849	0.138627	0.0888407	0.109967	0.125491
9.5	0.649317	0.360289	0.245766	0.161122	0.141429	0.0899972	0.10954	0.126072
9.6	0.650644	0.360962	0.247773	0.161843	0.142561	0.0921622	0.111282	0.12926
9.7	0.655556	0.365417	0.250661	0.162322	0.144321	0.0925268	0.111951	0.130919
9.8	0.657181	0.366415	0.248838	0.164277	0.146003	0.0932623	0.112297	0.13213
9.9	0.658742	0.3673	0.252638	0.166386	0.146501	0.0953002	0.115862	0.132563
10	0.661759	0.371349	0.256106	0.169991	0.148843	0.0953836	0.116537	0.133851
10.1	0.664276	0.374762	0.255431	0.169474	0.149643	0.0953273	0.117252	0.135372
10.2	0.666739	0.379261	0.257937	0.170751	0.150868	0.0970047	0.119071	0.137151
10.3	0.669404	0.379767	0.258885	0.174029	0.152244	0.0990321	0.120296	0.137758
10.4	0.669096	0.380557	0.261703	0.174883	0.154907	0.0997177	0.120551	0.139193
10.5	0.675395	0.382274	0.263274	0.177773	0.156367	0.099526	0.12313	0.141585
10.6	0.673949	0.385008	0.266228	0.179809	0.157592	0.10146	0.124457	0.142206
10.7	0.676597	0.38607	0.267997	0.17949	0.159518	0.102397	0.125616	0.145688
10.8	0.682742	0.387675	0.271119	0.179692	0.159666	0.103262	0.126197	0.144228
10.9	0.679374	0.391292	0.270906	0.183522	0.163427	0.103352	0.127668	0.147937
11	0.67758	0.391784	0.272327	0.183412	0.165067	0.105756	0.128435	0.147016
11.1	0.678758	0.396989	0.272934	0.184872	0.166734	0.106965	0.13	0.148195
11.2	0.683613	0.398091	0.274296	0.186608	0.167365	0.106748	0.130661	0.14992
11.3	0.68564	0.396191	0.279045	0.188306	0.170647	0.109892	0.132757	0.151648
11.4	0.68807	0.399648	0.280233	0.189404	0.170501	0.109163	0.134015	0.153325
11.5	0.688205	0.403013	0.278353	0.190496	0.171237	0.111732	0.133809	0.152879
11.6	0.690429	0.403644	0.280031	0.193722	0.173985	0.111749	0.136764	0.155801
11.7	0.686897	0.405605	0.284136	0.195001	0.173483	0.113412	0.135828	0.157609
11.8	0.689085	0.406205	0.285832	0.194653	0.175979	0.112985	0.138564	0.158482
11.9	0.692752	0.405951	0.285717	0.196216	0.176956	0.114233	0.139531	0.158784
12	0.695484	0.41194	0.289572	0.196914	0.178538	0.11575	0.14119	0.161793
12.1	0.696928	0.411854	0.288107	0.198831	0.180909	0.116006	0.142021	0.161633
12.2	0.696553	0.412121	0.28997	0.198889	0.183026	0.117421	0.142259	0.161187
12.3	0.701153	0.415365	0.294986	0.203805	0.183422	0.1199	0.145911	0.164796
12.4	0.701645	0.415015	0.291664	0.202378	0.185416	0.119373	0.145357	0.166015
12.5	0.702424	0.42105	0.294071	0.203832	0.187304	0.12259	0.147261	0.16749
12.6	0.700932	0.417849	0.295986	0.205124	0.18859	0.123205	0.148968	0.168236
12.7	0.702647	0.419528	0.296163	0.206857	0.188181	0.123257	0.150106	0.16948
12.8	0.703189	0.421383	0.298895	0.209691	0.189869	0.124414	0.151373	0.169968
12.9	0.704612	0.424021	0.301601	0.208652	0.192736	0.125749	0.151343	0.170338
13	0.704808	0.421564	0.301112	0.210581	0.193663	0.127402	0.153852	0.174889
13.1	0.705296	0.426955	0.30251	0.212542	0.194609	0.127556	0.153767	0.174354
13.2	0.706746	0.424458	0.303835	0.215613	0.193491	0.128314	0.154704	0.17546
13.3	0.709415	0.42595	0.30601	0.215572	0.196962	0.128364	0.156265	0.176727
13.4	0.709938	0.429276	0.305975	0.214567	0.1995	0.129902	0.158626	0.179028
13.5	0.710055	0.431972	0.307665	0.217149	0.200617	0.131127	0.158411	0.179999
13.6	0.713268	0.434446	0.310728	0.219572	0.201971	0.131646	0.159112	0.180015
13.7	0.71182	0.430912	0.311218	0.219537	0.203128	0.133542	0.160768	0.181599
13.8	0.710886	0.43604	0.312574	0.220014	0.205532	0.133382	0.162093	0.182474
13.9	0.71039	0.435377	0.310576	0.222227	0.20743	0.137539	0.163996	0.184843
14	0.712651	0.439101	0.316246	0.223021	0.207158	0.135509	0.166182	0.185637
14.1	0.711649	0.438194	0.316056	0.224969	0.208818	0.137081	0.165227	0.186468
14.2	0.711555	0.436844	0.317231	0.227174	0.210273	0.139064	0.167019	0.189006
14.3	0.713641	0.44173	0.317296	0.228032	0.211719	0.139075	0.170236	0.189129
14.4	0.714412	0.442278	0.318656	0.229834	0.212354	0.140431	0.172035	0.190536
14.5	0.714187	0.442593	0.319659	0.232172	0.214678	0.142969	0.171335	0.189746
14.6	0.71759	0.442912	0.320584	0.230499	0.21419	0.145153	0.171478	0.193103
14.7	0.715516	0.443768	0.323449	0.232931	0.216795	0.143355	0.174156	0.196695
14.8	0.717969	0.448065	0.322941	0.234139	0.219185	0.143234	0.176698	0.194274
14.9	0.715425	0.447858	0.325058	0.236427	0.219731	0.14643	0.178609	0.198333
15	0.714039	0.449775	0.326822	0.235892	0.221537	0.146322	0.179555	0.197841
15.1	0.720511	0.4496	0.327502	0.237415	0.221377	0.148601	0.178365	0.19895
15.2	0.719304	0.449373	0.329758	0.238484	0.223465	0.148891	0.180578	0.199992
15.3	0.718594	0.450836	0.331161	0.241028	0.223108	0.149681	0.181511	0.200571
15.4	0.71864	0.454203	0.330056	0.241832	0.2257	0.151875	0.182516	0.202567
15.5	0.719938	0.454931	0.331515	0.242316	0.227617	0.152392	0.185172	0.204718
15.6	0.72144	0.453905	0.333353	0.242395	0.22872	0.153335	0.184764	0.204172
15.7	0.716587	0.452591	0.335664	0.246406	0.228349	0.154507	0.185556	0.205622
15.8	0.720217	0.455785	0.334618	0.244864	0.231276	0.155657	0.187589	0.206462
15.9	0.723036	0.458271	0.338299	0.245489	0.23317	0.158197	0.188073	0.207989
16	0.719042	0.458212	0.336085	0.249063	0.23455	0.15763	0.189058	0.20742
16.1	0.724641	0.458773	0.339777	0.246371	0.23519	0.158755	0.191036	0.209362
16.2	0.72203	0.459913	0.341592	0.251567	0.236069	0.159514	0.194041	0.208468
16.3	0.723745	0.460984	0.3434	0.250211	0.238126	0.161718	0.191294	0.21211
16.4	0.723034	0.46672	0.34109	0.251845	0.238244	0.161347	0.193995	0.215167
16.5	0.724435	0.461323	0.341956	0.252363	0.240074	0.163429	0.195741	0.213784
16.6	0.722401	0.466516	0.347714	0.25512	0.238646	0.161856	0.196156	0.215905
16.7	0.723864	0.463338	0.343738	0.256891	0.242297	0.164623	0.197695	0.216822
16.8	0.724733	0.46551	0.346513	0.254812	0.242672	0.165477	0.20005	0.218172
16.9	0.725316	0.463451	0.346674	0.256062	0.244479	0.167663	0.200525	0.218428
17	0.725449	0.46477	0.347312	0.259579	0.245562	0.167319	0.200342	0.22116
17.1	0.725337	0.466241	0.348157	0.261138	0.247365	0.168674	0.20205	0.22151
17.2	0.722418	0.465337	0.349372	0.260813	0.246571	0.170211	0.203811	0.224275
17.3	0.726606	0.469152	0.349941	0.260142	0.250465	0.17057	0.205174	0.222479
17.4	0.722351	0.468931	0.352677	0.261651	0.250847	0.17266	0.205761	0.225532
17.5	0.724651	0.468862	0.354259	0.262524	0.251078	0.172424	0.206184	0.226248
17.6	0.723747	0.474265	0.353865	0.265495	0.252124	0.175737	0.20757	0.226882
17.7	0.727114	0.47029	0.355592	0.264859	0.255081	0.175973	0.208922	0.226771
17.8	0.728483	0.47134	0.355265	0.268291	0.254501	0.178121	0.209781	0.228572
17.9	0.724722	0.472004	0.354729	0.269123	0.256693	0.175892	0.21171	0.233125
18	0.726843	0.472317	0.358672	0.268464	0.258185	0.179721	0.210625	0.232387
18.1	0.726802	0.475907	0.357772	0.269008	0.257333	0.179086	0.211702	0.233464
18.2	0.724255	0.473928	0.359345	0.271221	0.260498	0.180988	0.215844	0.233375
18.3	0.727027	0.473971	0.360918	0.271115	0.261586	0.181682	0.216997	0.235454
18.4	0.723399	0.473413	0.361872	0.272784	0.261759	0.182618	0.216149	0.235504
18.5	0.726595	0.475228	0.361133	0.27443	0.261903	0.183101	0.21876	0.237825
18.6	0.727848	0.476326	0.362183	0.274261	0.262144	0.185045	0.218853	0.23859
18.7	0.725656	0.475995	0.362022	0.275918	0.26563	0.18516	0.221181	0.238699
18.8	0.726212	0.479783	0.363931	0.276995	0.266108	0.186054	0.220993	0.24008
18.9	0.724585	0.479045	0.364492	0.277451	0.26731	0.186533	0.222289	0.239155
19	0.725524	0.477843	0.366334	0.277439	0.269516	0.189763	0.222862	0.242172
19.1	0.723987	0.478349	0.366738	0.280029	0.267649	0.19004	0.223504	0.243572
19.2	0.724803	0.477837	0.368001	0.279968	0.269694	0.191663	0.22475	0.242864
19.3	0.727891	0.479087	0.368386	0.28285	0.272969	0.192182	0.225773	0.24556
19.4	0.728075	0.479154	0.370868	0.281621	0.271094	0.192697	0.229086	0.246817
19.5	0.72865	0.478706	0.369147	0.280791	0.272523	0.193336	0.230712	0.246519
19.6	0.729856	0.480091	0.368474	0.283944	0.274469	0.195666	0.230153	0.246233
19.7	0.726647	0.483773	0.368726	0.283846	0.275117	0.195576	0.22887	0.249657
19.8	0.726499	0.480631	0.370399	0.28653	0.275122	0.195412	0.231141	0.251138
19.9	0.727502	0.483002	0.372747	0.289097	0.275682	0.198231	0.233702	0.250334
20	0.724303	0.485896	0.373381	0.286351	0.278949	0.198869	0.232395	0.249455
20.1	0.724991	0.481906	0.373568	0.288968	0.279302	0.200429	0.23286	0.252168
20.2	0.725508	0.484794	0.373906	0.287988	0.280129	0.200346	0.235248	0.253024
20.3	0.728008	0.483194	0.376304	0.289583	0.280925	0.201986	0.235911	0.25317
20.4	0.727475	0.485976	0.374562	0.290864	0.281356	0.202288	0.236133	0.255099
20.5	0.722936	0.489226	0.375043	0.291456	0.2826	0.203759	0.238986	0.25591
20.6	0.723814	0.485759	0.379774	0.294317	0.283115	0.205586	0.238134	0.25477
20.7	0.726777	0.484575	0.379484	0.292368	0.285438	0.205222	0.240672	0.256216
20.8	0.726652	0.489366	0.375502	0.293808	0.284894	0.205336	0.240109	0.256091
20.9	0.725541	0.486786	0.380849	0.295148	0.283669	0.207472	0.241562	0.258752
21	0.720769	0.48742	0.376975	0.296536	0.287426	0.209243	0.244408	0.26099
21.1	0.725333	0.488568	0.378675	0.297503	0.288572	0.209029	0.243918	0.261611
21.2	0.724928	0.48951	0.377211	0.298059	0.289026	0.210394	0.24456	0.263303
21.3	0.729729	0.486978	0.380455	0.29665	0.289793	0.210254	0.246504	0.261494
21.4	0.722526	0.490239	0.380159	0.297032	0.290551	0.2119	0.247313	0.262315
21.5	0.72537	0.48908	0.384645	0.299313	0.291568	0.212717	0.248404	0.262338
21.6	0.723928	0.490418	0.382647	0.299905	0.291366	0.212986	0.246992	0.26383
21.7	0.723953	0.492083	0.380988	0.303895	0.295448	0.214375	0.249828	0.26717
21.8	0.727964	0.489335	0.384218	0.303704	0.291593	0.21594	0.249588	0.266328
21.9	0.721955	0.490303	0.385164	0.302122	0.296148	0.216497	0.250644	0.268202
22	0.722882	0.490066	0.384974	0.304114	0.295296	0.215686	0.25232	0.267047
22.1	0.723678	0.489062	0.386156	0.304225	0.295875	0.220158	0.251822	0.271792
22.2	0.725749	0.494402	0.386835	0.307769	0.297926	0.219899	0.25158	0.27229
22.3	0.723028	0.490606	0.385368	0.306146	0.297922	0.219939	0.253474	0.271196
22.4	0.724201	0.490093	0.3877	0.305779	0.298984	0.221545	0.255718	0.270473
22.5	0.724245	0.491895	0.390257	0.307961	0.30082	0.221429	0.257846	0.273278
22.6	0.724399	0.491162	0.38885	0.306577	0.302449	0.223196	0.256166	0.27285
22.7	0.72332	0.490379	0.388642	0.309032	0.304187	0.225157	0.258167	0.274565
22.8	0.721705	0.492391	0.390142	0.310042	0.303093	0.224579	0.257627	0.275036
22.9	0.721955	0.493281	0.388908	0.310734	0.304523	0.225321	0.259369	0.27683
23	0.720542	0.491956	0.388252	0.310822	0.305287	0.226778	0.260438	0.27727
23.1	0.724564	0.491354	0.39105	0.310695	0.306188	0.22714	0.262115	0.27643
23.2	0.718019	0.492887	0.38995	0.313516	0.3065	0.226917	0.262594	0.277562
23.3	0.720878	0.494338	0.393738	0.312178	0.303964	0.229566	0.261655	0.277174
23.4	0.722549	0.492902	0.39302	0.314281	0.308432	0.229951	0.263953	0.277862
23.5	0.721111	0.493192	0.393889	0.312741	0.306617	0.229297	0.262984	0.280671
23.6	0.717494	0.493506	0.392809	0.314731	0.310015	0.229441	0.265605	0.27987
23.7	0.716446	0.496771	0.394209	0.316241	0.310301	0.234787	0.267568	0.28211
23.8	0.721165	0.492831	0.394607	0.316244	0.311845	0.234137	0.264768	0.279381
23.9	0.713981	0.491133	0.396206	0.317529	0.312376	0.234316	0.268656	0.283381
24	0.717152	0.493944	0.394384	0.317196	0.313658	0.234358	0.266889	0.283011
24.1	0.718133	0.493669	0.395612	0.317919	0.312895	0.235346	0.270935	0.283613
24.2	0.717908	0.495159	0.397587	0.316479	0.314331	0.236467	0.267918	0.285861
24.3	0.718779	0.495038	0.395881	0.319282	0.313174	0.236902	0.269919	0.2837
24.4	0.715362	0.493023	0.397318	0.318125	0.311861	0.237859	0.270533	0.285319
24.5	0.714891	0.494033	0.397114	0.319202	0.313991	0.239238	0.269254	0.284627
24.6	0.718048	0.493794	0.397241	0.319767	0.316889	0.237971	0.275401	0.288341
24.7	0.716664	0.494206	0.399658	0.32	0.313028	0.240574	0.274349	0.287349
24.8	0.720515	0.495609	0.399217	0.321144	0.317306	0.239713	0.273469	0.287772
24.9	0.71719	0.494573	0.396827	0.320705	0.316998	0.241764	0.276245	0.287182
25	0.714341	0.494763	0.397787	0.32198	0.317223	0.24247	0.275834	0.288887
25.1	0.716354	0.491775	0.398031	0.32302	0.317031	0.243431	0.276882	0.288084
25.2	0.716808	0.495354	0.399171	0.323766	0.319027	0.244193	0.276643	0.289741
25.3	0.713149	0.496073	0.400204	0.324528	0.321578	0.243497	0.276959	0.291468
25.4	0.71695	0.498836	0.396874	0.321963	0.321144	0.244864	0.278954	0.292577
25.5	0.712912	0.493	0.399877	0.324074	0.319377	0.247704	0.278676	0.289366
25.6	0.715591	0.498174	0.399787	0.325306	0.320161	0.24725	0.278933	0.292435
25.7	0.71272	0.499095	0.398871	0.327279	0.32397	0.249757	0.280718	0.294642
25.8	0.712582	0.495084	0.401461	0.325137	0.32192	0.248971	0.28204	0.293919
25.9	0.712053	0.49724	0.400869	0.327921	0.325666	0.248911	0.28239	0.2933
26	0.711768	0.497276	0.401623	0.325893	0.322357	0.25199	0.282823	0.295427
26.1	0.711914	0.495129	0.401502	0.328608	0.325039	0.252134	0.28459	0.294619
26.2	0.711549	0.49628	0.401754	0.328212	0.322407	0.25182	0.285073	0.296338
26.3	0.713456	0.499466	0.400477	0.328335	0.325206	0.252607	0.285569	0.295254
26.4	0.708194	0.494396	0.400621	0.329721	0.32408	0.250774	0.284188	0.296244
26.5	0.708061	0.496959	0.402471	0.330056	0.327887	0.253503	0.284963	0.296771
26.6	0.712272	0.496059	0.4016	0.330915	0.327064	0.254397	0.284888	0.296517
26.7	0.708963	0.497171	0.403844	0.33175	0.325612	0.255872	0.28593	0.298084
26.8	0.710136	0.49609	0.403253	0.333201	0.327673	0.255893	0.285292	0.298053
26.9	0.706569	0.498026	0.402913	0.33169	0.327091	0.256097	0.288232	0.298763
27	0.70834	0.494788	0.401659	0.333638	0.328998	0.256272	0.287201	0.299466
27.1	0.70828	0.496803	0.401267	0.331355	0.328177	0.257804	0.288897	0.298124
27.2	0.707792	0.495456	0.402813	0.334326	0.330396	0.256787	0.289751	0.299561
27.3	0.704694	0.494415	0.40497	0.333386	0.331107	0.2582	0.292139	0.298263
27.4	0.706573	0.497617	0.40617	0.334061	0.330642	0.259263	0.289266	0.300055
27.5	0.701737	0.498722	0.405716	0.334397	0.332315	0.259956	0.290224	0.301176
27.6	0.705537	0.496257	0.40613	0.335476	0.332792	0.260698	0.289728	0.300826
27.7	0.704252	0.496446	0.404561	0.33603	0.332703	0.259231	0.291485	0.303543
27.8	0.705362	0.498405	0.404147	0.336576	0.332815	0.261717	0.292944	0.303489
27.9	0.704616	0.498192	0.40383	0.336637	0.332492	0.261192	0.292277	0.299584
28	0.705727	0.495575	0.405934	0.33717	0.334107	0.262801	0.294681	0.302103
28.1	0.702889	0.495713	0.404295	0.338856	0.334609	0.262521	0.296232	0.302779
28.2	0.70131	0.497357	0.405318	0.336864	0.332317	0.265618	0.29335	0.303866
28.3	0.707444	0.496907	0.404359	0.336743	0.333524	0.264324	0.297344	0.306842
28.4	0.701414	0.498334	0.405305	0.337604	0.334099	0.266374	0.296452	0.303533
28.5	0.702466	0.497109	0.404974	0.337051	0.337206	0.264905	0.296371	0.307461
28.6	0.704023	0.495959	0.405576	0.339483	0.336472	0.266666	0.297838	0.307784
28.7	0.702183	0.497342	0.406668	0.339954	0.335366	0.268462	0.297865	0.305965
28.8	0.702849	0.494958	0.406124	0.339035	0.336351	0.268806	0.296202	0.305558
28.9	0.699097	0.498267	0.405272	0.339593	0.336578	0.267735	0.297392	0.309459
29	0.703404	0.496948	0.404951	0.340937	0.33966	0.269533	0.29857	0.306361
29.1	0.699282	0.498782	0.40553	0.341185	0.337708	0.268818	0.297253	0.308509
29.2	0.695838	0.499195	0.406426	0.339996	0.33881	0.273067	0.29675	0.309309
29.3	0.699845	0.497811	0.406089	0.340946	0.340619	0.271559	0.300493	0.308776
29.4	0.697261	0.497724	0.40504	0.342634	0.338529	0.27215	0.300072	0.30621
29.5	0.695481	0.493627	0.407737	0.343048	0.340346	0.271215	0.29874	0.306033
29.6	0.695271	0.495904	0.406872	0.343184	0.33817	0.273163	0.300603	0.308432
29.7	0.695998	0.495331	0.408018	0.341062	0.337962	0.271536	0.30392	0.309449
29.8	0.699472	0.496769	0.408689	0.34359	0.340539	0.272848	0.303943	0.308592
29.9	0.698026	0.497696	0.408895	0.345107	0.340817	0.273275	0.302504	0.31058

## Sheet: primary data  n=2
time	L	DL	DDL	DDDL	LDDD	DLDD	DDLD	DDDL
0	0.0172478	0.00970319	0.00929105	0.00888407	0.00578533	0.00621808	0.00619232	0.0062902
0.1	0.0221883	0.0110555	0.0107567	0.0103162	0.00596822	0.00690325	0.00703204	0.00749827
0.2	0.0277598	0.0128663	0.0120163	0.0116608	0.00646536	0.00772237	0.0083689	0.00820147
0.3	0.0331742	0.0151202	0.0131883	0.0125469	0.0073025	0.00840496	0.00884543	0.0098191
0.4	0.040281	0.0177681	0.0150249	0.013876	0.00763479	0.00936833	0.00939409	0.0105094
0.5	0.0470065	0.0193033	0.0156997	0.0158594	0.00827617	0.00961046	0.0105635	0.0117278
0.6	0.0531215	0.022044	0.0175827	0.0166348	0.0085286	0.010257	0.011241	0.0124207
0.7	0.0612483	0.0242077	0.01919	0.018188	0.0100329	0.0109679	0.0120446	0.0134588
0.8	0.0693545	0.026848	0.0206814	0.0190123	0.0102364	0.0117433	0.0128045	0.014077
0.9	0.0779964	0.0286923	0.0232263	0.0210111	0.0108056	0.0121863	0.0136391	0.0152464
1	0.0853916	0.0315154	0.0240145	0.0218663	0.0113852	0.0130209	0.0141001	0.0163798
1.1	0.0909941	0.0344596	0.0258279	0.0231156	0.0123151	0.0133635	0.0146024	0.0168099
1.2	0.101779	0.037311	0.02819	0.0233139	0.0123511	0.0142547	0.0159084	0.0181442
1.3	0.108453	0.039771	0.0291894	0.025099	0.0137498	0.0146823	0.0165343	0.0182575
1.4	0.116044	0.0441396	0.0306293	0.0264822	0.0148188	0.0159213	0.0167249	0.0204393
1.5	0.126919	0.0469292	0.0325895	0.0270695	0.015504	0.0158929	0.017575	0.0206531
1.6	0.13511	0.0489435	0.034542	0.0286305	0.0162329	0.0166502	0.0184997	0.0218251
1.7	0.140038	0.0520139	0.0366207	0.030261	0.0167945	0.0172478	0.0190741	0.0226236
1.8	0.151158	0.0562048	0.0386273	0.0311883	0.0178866	0.0186156	0.0198829	0.0233268
1.9	0.159045	0.0583479	0.0404767	0.0330764	0.0187727	0.0185229	0.0205294	0.0236488
2	0.166688	0.0616192	0.0419089	0.0346966	0.0200838	0.0198726	0.0213923	0.0253488
2.1	0.175232	0.0645686	0.0444384	0.0353585	0.0216602	0.0194038	0.0221754	0.0261989
2.2	0.184178	0.0693184	0.0466278	0.0373007	0.0220775	0.02055	0.0226622	0.0272421
2.3	0.189837	0.07175	0.0479415	0.0373677	0.0226983	0.0209441	0.0227756	0.0269227
2.4	0.201616	0.0753742	0.0510196	0.0399744	0.0239424	0.0224433	0.0235844	0.0281307
2.5	0.20785	0.0784626	0.0532632	0.041368	0.024929	0.0225412	0.0242927	0.0293002
2.6	0.213864	0.0824526	0.0553084	0.0427177	0.0259954	0.0231053	0.0259181	0.0311213
2.7	0.222869	0.0873956	0.0586029	0.0437738	0.0267836	0.0232521	0.025099	0.0321774
2.8	0.231653	0.0885573	0.0592417	0.0446547	0.0278474	0.0245374	0.0271983	0.0319945
2.9	0.239102	0.09145	0.0625517	0.0463187	0.0292976	0.025251	0.028172	0.0325895
3	0.244718	0.0957517	0.0647102	0.0471147	0.0299055	0.0255704	0.0282647	0.0339676
3.1	0.251971	0.0984151	0.0663073	0.0495282	0.0319971	0.0270334	0.0291765	0.0354255
3.2	0.257558	0.103034	0.0674793	0.0501387	0.032896	0.0269639	0.0293774	0.0367443
3.3	0.265013	0.106472	0.0710726	0.0515322	0.033929	0.0277289	0.0307014	0.037651
3.4	0.273369	0.11013	0.072224	0.051898	0.0350752	0.0284398	0.031214	0.0380117
3.5	0.278278	0.111122	0.0738493	0.0542858	0.0359613	0.0287644	0.0318013	0.0398122
3.6	0.286366	0.115258	0.0762448	0.0569003	0.0369092	0.0290658	0.0315721	0.0405746
3.7	0.290431	0.119058	0.0793745	0.0562847	0.0389003	0.0301064	0.0324298	0.041283
3.8	0.298179	0.121675	0.0808273	0.0574927	0.0397452	0.0312681	0.0338362	0.0424138
3.9	0.304665	0.126445	0.0819194	0.0582397	0.0409893	0.0317859	0.0346296	0.0428954
4	0.308547	0.126317	0.0858244	0.0603802	0.0417775	0.0319559	0.0350804	0.0449175
4.1	0.31715	0.131677	0.0877279	0.0618433	0.0436115	0.0327801	0.0368139	0.0450592
4.2	0.322057	0.134441	0.0903527	0.0628968	0.0444641	0.0331742	0.0371462	0.0468004
4.3	0.329076	0.13756	0.0924546	0.0664283	0.0462466	0.0340114	0.0369427	0.0471791
4.4	0.334058	0.139896	0.0942242	0.0663871	0.0470065	0.0352761	0.0381817	0.0478823
4.5	0.341002	0.143544	0.0967228	0.0669332	0.0480317	0.0356676	0.0386633	0.049791
4.6	0.347388	0.147065	0.0979926	0.069321	0.0496184	0.0362395	0.0395108	0.0494561
4.7	0.351532	0.149254	0.100265	0.0705883	0.0513236	0.0371513	0.0409043	0.0522277
4.8	0.356136	0.154045	0.102168	0.071021	0.0519856	0.0369839	0.0405617	0.052833
4.9	0.365012	0.155207	0.104018	0.0727984	0.0524698	0.0386968	0.041641	0.0541055
5	0.371833	0.158285	0.106135	0.0745757	0.0540823	0.0382229	0.0428542	0.0543631
5.1	0.376356	0.161227	0.10741	0.0766467	0.0553393	0.0397581	0.0432097	0.0553058
5.2	0.379411	0.163901	0.111366	0.077064	0.0572326	0.0398457	0.0443122	0.0575983
5.3	0.384887	0.166064	0.11345	0.0776487	0.0579358	0.0401934	0.044799	0.0581315
5.4	0.391396	0.169349	0.113216	0.0791736	0.0609418	0.04152	0.0457752	0.0600093
5.5	0.394977	0.173017	0.117479	0.0811904	0.0613565	0.0423082	0.0466227	0.0599887
5.6	0.402933	0.173836	0.118669	0.0825994	0.0624358	0.043135	0.0481399	0.0613797
5.7	0.4086	0.178526	0.119851	0.083707	0.0635331	0.0427795	0.0485778	0.0621627
5.8	0.408559	0.1812	0.123625	0.0853272	0.0652924	0.0442941	0.0487632	0.0643986
5.9	0.419573	0.183874	0.124014	0.0864246	0.0661063	0.045157	0.0497137	0.0645711
6	0.423437	0.186612	0.12644	0.0890802	0.067098	0.0460251	0.0507543	0.0651636
6.1	0.429055	0.189401	0.12863	0.0898942	0.0680279	0.0467875	0.0511768	0.0652512
6.2	0.433292	0.192142	0.130665	0.0913547	0.0710262	0.0470039	0.0519418	0.0672139
6.3	0.434938	0.191975	0.131643	0.0913882	0.0711009	0.0468674	0.0537037	0.0685611
6.4	0.443317	0.196565	0.1329	0.0916947	0.072989	0.0473336	0.0527583	0.0689629
6.5	0.445932	0.199285	0.135628	0.0941907	0.0744572	0.0485443	0.0544326	0.070068
6.6	0.449767	0.202974	0.136445	0.0947857	0.0775972	0.0483897	0.0543682	0.0709103
6.7	0.454947	0.204084	0.138889	0.0970963	0.076894	0.0509218	0.0550225	0.0724712
6.8	0.460171	0.206899	0.141272	0.0980184	0.0783261	0.0512978	0.0570651	0.0741661
6.9	0.461096	0.20956	0.143114	0.0990977	0.0793204	0.0502417	0.0571398	0.0735891
7	0.469266	0.212195	0.145689	0.100061	0.0814609	0.0528279	0.0584819	0.0756369
7.1	0.472494	0.216664	0.147384	0.101653	0.0822028	0.0527042	0.0595689	0.0768424
7.2	0.475291	0.217694	0.14986	0.101944	0.0834675	0.0533482	0.0605786	0.0784884
7.3	0.477756	0.219943	0.151168	0.101885	0.0844978	0.0541261	0.0602077	0.0795728
7.4	0.481012	0.221447	0.152371	0.104765	0.0857651	0.0554655	0.061833	0.0796784
7.5	0.485615	0.223431	0.157358	0.106431	0.0880654	0.0552414	0.0621447	0.080495
7.6	0.492511	0.228191	0.156791	0.107176	0.0884337	0.0566685	0.0629226	0.0816927
7.7	0.493381	0.225615	0.15852	0.107879	0.0894821	0.0565757	0.0648004	0.0840754
7.8	0.500143	0.23036	0.160261	0.109916	0.0913315	0.0570729	0.0643805	0.0853607
7.9	0.501019	0.233402	0.16406	0.111343	0.0931887	0.0578508	0.0660162	0.0866383
8	0.505449	0.236647	0.163656	0.112858	0.0947059	0.0576653	0.0672809	0.0867053
8.1	0.510583	0.236972	0.166796	0.114411	0.0960093	0.0600918	0.0669821	0.0870505
8.2	0.509723	0.236483	0.166371	0.115171	0.098276	0.0598187	0.0685225	0.0893327
8.3	0.515964	0.242724	0.169995	0.117868	0.0985748	0.0628737	0.068404	0.0891833
8.4	0.517213	0.244692	0.173297	0.117621	0.0995845	0.062513	0.0701684	0.090582
8.5	0.521257	0.247111	0.174529	0.117891	0.101929	0.0623353	0.0710468	0.0912362
8.6	0.526834	0.248156	0.174866	0.12059	0.101998	0.0634944	0.0715851	0.0920141
8.7	0.52722	0.249594	0.178454	0.122419	0.103536	0.0638551	0.0706295	0.0943015
8.8	0.532444	0.251064	0.179438	0.122394	0.106905	0.0649498	0.0724764	0.095185
8.9	0.53469	0.254457	0.181416	0.124137	0.107505	0.0650039	0.0740631	0.0945101
9	0.536534	0.25576	0.183214	0.124032	0.106905	0.0653748	0.0752841	0.0969494
9.1	0.541833	0.259057	0.183812	0.125304	0.10893	0.0681361	0.0752866	0.0978587
9.2	0.541993	0.259673	0.186522	0.127896	0.110782	0.0670568	0.0773576	0.0994712
9.3	0.549488	0.26213	0.189582	0.129011	0.112049	0.0688264	0.0775894	0.10087
9.4	0.543402	0.264624	0.190347	0.127919	0.114682	0.0694292	0.0778109	0.101916
9.5	0.551253	0.267336	0.193167	0.129706	0.116024	0.0696069	0.0780788	0.102359
9.6	0.552265	0.268825	0.193664	0.13052	0.116467	0.0689269	0.0798124	0.102974
9.7	0.557517	0.268493	0.197881	0.131355	0.11666	0.0721673	0.0817906	0.105584
9.8	0.558633	0.27112	0.196178	0.133403	0.118883	0.0723321	0.0809097	0.106163
9.9	0.563066	0.273809	0.197801	0.134477	0.119717	0.0751475	0.0825016	0.107085
10	0.562759	0.275355	0.200349	0.136128	0.121399	0.0745345	0.0833773	0.107268
10.1	0.56678	0.275198	0.199957	0.134253	0.122991	0.0747715	0.0833464	0.10894
10.2	0.567756	0.275847	0.20319	0.138302	0.122723	0.0746478	0.0831301	0.109061
10.3	0.570899	0.278865	0.203527	0.139026	0.126752	0.0765359	0.0846472	0.111449
10.4	0.572156	0.280955	0.205761	0.138243	0.127411	0.077525	0.0862649	0.113716
10.5	0.576831	0.284749	0.207262	0.141527	0.128089	0.0774375	0.0875863	0.113571
10.6	0.577464	0.289146	0.209099	0.141957	0.127829	0.0779372	0.0886887	0.115096
10.7	0.579976	0.289465	0.206768	0.141854	0.129173	0.0781149	0.0892992	0.115725
10.8	0.577611	0.28979	0.210693	0.14289	0.129516	0.0804718	0.0880499	0.11626
10.9	0.582274	0.291837	0.212782	0.144007	0.132687	0.0802142	0.0892039	0.118128
11	0.583786	0.29234	0.215338	0.14326	0.134263	0.0795909	0.0906103	0.118816
11.1	0.587631	0.291536	0.21467	0.146908	0.134333	0.0815562	0.0930342	0.120364
11.2	0.58427	0.294184	0.218962	0.146117	0.134719	0.0836736	0.0931011	0.121247
11.3	0.59047	0.298916	0.220744	0.148041	0.137746	0.0829935	0.0947728	0.123174
11.4	0.592337	0.299202	0.220471	0.149082	0.137946	0.0844412	0.0948785	0.121569
11.5	0.593064	0.299789	0.223992	0.148134	0.13995	0.0844721	0.0956976	0.122489
11.6	0.596072	0.301955	0.224157	0.149064	0.140386	0.0859042	0.0964626	0.124663
11.7	0.594571	0.304397	0.223678	0.151645	0.139953	0.0855359	0.0967485	0.125557
11.8	0.595941	0.309248	0.227292	0.152101	0.142292	0.0852242	0.0990693	0.127785
11.9	0.600601	0.307808	0.228003	0.153875	0.144669	0.0889205	0.0991853	0.127975
12	0.600299	0.311597	0.228863	0.154597	0.144314	0.0893327	0.100362	0.128717
12.1	0.600511	0.309876	0.228054	0.154744	0.147284	0.087867	0.101215	0.129992
12.2	0.604292	0.313057	0.230326	0.15496	0.147688	0.0892606	0.102008	0.131953
12.3	0.606025	0.315298	0.233224	0.156351	0.14816	0.0896881	0.102673	0.13018
12.4	0.606476	0.315301	0.233023	0.158012	0.150702	0.0914449	0.103564	0.130935
12.5	0.608362	0.317851	0.235648	0.157386	0.153028	0.0912465	0.105257	0.13281
12.6	0.613658	0.320929	0.234813	0.159545	0.153739	0.0947085	0.106848	0.134451
12.7	0.615909	0.320033	0.237433	0.159841	0.153561	0.0945616	0.106024	0.134564
12.8	0.615293	0.323992	0.238476	0.159612	0.156281	0.0937502	0.105996	0.137266
12.9	0.619309	0.325831	0.237745	0.162414	0.156943	0.0942036	0.108847	0.136257
13	0.616275	0.324092	0.238886	0.163803	0.15792	0.0966584	0.109885	0.137264
13.1	0.623773	0.326016	0.241464	0.166422	0.160632	0.0969263	0.110674	0.140185
13.2	0.618678	0.32869	0.241807	0.165021	0.162061	0.0975522	0.111866	0.140033
13.3	0.623492	0.329545	0.243891	0.164962	0.162744	0.0974337	0.112533	0.142349
13.4	0.624389	0.330691	0.244421	0.167703	0.164011	0.100048	0.111928	0.144752
13.5	0.627799	0.331521	0.245271	0.170665	0.164029	0.0992265	0.112469	0.143191
13.6	0.6229	0.33227	0.245931	0.171734	0.165742	0.101594	0.113692	0.143897
13.7	0.627711	0.332708	0.246165	0.170518	0.166518	0.101694	0.112801	0.146952
13.8	0.629355	0.335467	0.248836	0.17246	0.168323	0.103054	0.115323	0.146568
13.9	0.63045	0.337631	0.249292	0.175057	0.169027	0.102462	0.116953	0.147856
14	0.632701	0.340382	0.250562	0.174431	0.169042	0.103075	0.117955	0.149945
14.1	0.635869	0.340632	0.25279	0.174807	0.174055	0.105834	0.118154	0.149458
14.2	0.635042	0.340639	0.25373	0.175878	0.174351	0.106774	0.119133	0.151359
14.3	0.636577	0.34345	0.252852	0.177911	0.174809	0.10732	0.119965	0.152472
14.4	0.639014	0.343202	0.256072	0.178982	0.177687	0.107794	0.120034	0.152722
14.5	0.640343	0.344222	0.256937	0.178555	0.178529	0.108278	0.122752	0.153407
14.6	0.643849	0.348341	0.25967	0.180582	0.177184	0.10834	0.12328	0.1548
14.7	0.642072	0.345817	0.258439	0.181398	0.177741	0.110068	0.123251	0.15768
14.8	0.643996	0.347421	0.257074	0.183657	0.178712	0.110751	0.125482	0.156755
14.9	0.647659	0.349897	0.261195	0.183142	0.181349	0.111639	0.125843	0.158641
15	0.643872	0.350518	0.263047	0.18495	0.181393	0.113121	0.125495	0.160104
15.1	0.647849	0.350852	0.260744	0.185193	0.184471	0.113262	0.12704	0.158512
15.2	0.651067	0.353173	0.263447	0.183719	0.186243	0.114035	0.13001	0.163071
15.3	0.651793	0.354737	0.267398	0.185231	0.184358	0.114578	0.129454	0.163455
15.4	0.649825	0.35519	0.266867	0.189767	0.186179	0.116423	0.130103	0.162523
15.5	0.651716	0.358616	0.265329	0.188021	0.188855	0.116021	0.130363	0.163133
15.6	0.650582	0.357748	0.269412	0.19029	0.188181	0.117788	0.131945	0.164215
15.7	0.657107	0.357225	0.271143	0.190844	0.18977	0.116874	0.131473	0.165013
15.8	0.652597	0.35952	0.270401	0.189646	0.192335	0.119158	0.13424	0.166943
15.9	0.65671	0.360532	0.272065	0.189649	0.192539	0.118249	0.134992	0.166023
16	0.656574	0.362129	0.272872	0.190522	0.194934	0.118726	0.133702	0.16957
16.1	0.656723	0.360252	0.273892	0.192181	0.193667	0.121126	0.136004	0.168692
16.2	0.658382	0.364309	0.275682	0.193093	0.194713	0.119604	0.134214	0.170783
16.3	0.65949	0.363206	0.273212	0.194314	0.196562	0.122262	0.137717	0.170023
16.4	0.662122	0.364883	0.276485	0.194476	0.198005	0.12313	0.138297	0.172592
16.5	0.663044	0.370887	0.277516	0.195993	0.198028	0.123177	0.14061	0.173354
16.6	0.660285	0.367299	0.278755	0.196279	0.201273	0.125405	0.140218	0.174013
16.7	0.660221	0.370285	0.277809	0.196312	0.202198	0.12431	0.139773	0.17492
16.8	0.66077	0.371068	0.281915	0.196725	0.201194	0.124189	0.142681	0.175252
16.9	0.66501	0.371536	0.28258	0.198121	0.20098	0.126157	0.143871	0.179482
17	0.66569	0.374996	0.281179	0.199009	0.204583	0.126456	0.143549	0.179822
17.1	0.66586	0.374501	0.284226	0.201544	0.205184	0.128418	0.145102	0.181324
17.2	0.668775	0.374955	0.285305	0.203002	0.206162	0.129248	0.145834	0.182524
17.3	0.669257	0.376557	0.282564	0.201477	0.206917	0.129253	0.145659	0.183954
17.4	0.668917	0.377381	0.286438	0.204169	0.209436	0.131404	0.147621	0.183588
17.5	0.668368	0.377103	0.290055	0.206312	0.209936	0.130142	0.148345	0.181452
17.6	0.672755	0.38185	0.290356	0.202157	0.21176	0.132504	0.148925	0.182552
17.7	0.669167	0.380171	0.288695	0.207329	0.212806	0.133132	0.149615	0.186535
17.8	0.675367	0.379486	0.288762	0.207662	0.210441	0.135144	0.151995	0.188397
17.9	0.673536	0.38219	0.291531	0.207298	0.213187	0.136368	0.151542	0.187658
18	0.673306	0.382115	0.293509	0.208308	0.213022	0.136986	0.152286	0.189082
18.1	0.67522	0.380147	0.291716	0.210098	0.215806	0.137199	0.15573	0.189188
18.2	0.675766	0.383342	0.293566	0.210052	0.217378	0.138809	0.154465	0.191405
18.3	0.676606	0.38499	0.295359	0.211139	0.216906	0.139	0.156315	0.191022
18.4	0.677175	0.386917	0.293999	0.213753	0.218377	0.137962	0.157314	0.190692
18.5	0.677353	0.385554	0.295449	0.213509	0.220291	0.140991	0.155364	0.193409
18.6	0.681487	0.383581	0.298754	0.212602	0.22051	0.141499	0.157528	0.193798
18.7	0.683641	0.388921	0.299189	0.212267	0.223292	0.141679	0.158641	0.193791
18.8	0.681237	0.391767	0.299887	0.216883	0.223006	0.143552	0.157868	0.196307
18.9	0.679285	0.39119	0.30006	0.215904	0.223209	0.141983	0.159653	0.19613
19	0.685008	0.388645	0.298146	0.214992	0.225806	0.143667	0.161588	0.197933
19.1	0.682639	0.392919	0.300392	0.217767	0.227459	0.145131	0.163133	0.198881
19.2	0.684362	0.394647	0.300796	0.218022	0.228273	0.145468	0.164238	0.198783
19.3	0.684854	0.396154	0.30296	0.217576	0.228132	0.146617	0.164588	0.201248
19.4	0.6865	0.396311	0.306504	0.221048	0.229752	0.14741	0.162891	0.202847
19.5	0.690946	0.394595	0.304701	0.220381	0.228557	0.148546	0.165552	0.202662
19.6	0.687262	0.396159	0.306105	0.221136	0.230883	0.14937	0.16684	0.202309
19.7	0.687801	0.396896	0.306772	0.221641	0.233536	0.150195	0.165168	0.203553
19.8	0.687445	0.399291	0.305665	0.220865	0.23402	0.150084	0.166541	0.206629
19.9	0.691736	0.400538	0.309062	0.222774	0.234953	0.151923	0.169537	0.207082
20	0.688141	0.402248	0.310002	0.220909	0.235069	0.15157	0.169737	0.207582
20.1	0.690157	0.400783	0.309348	0.221571	0.238391	0.152302	0.171723	0.20583
20.2	0.692798	0.405548	0.310875	0.224605	0.23655	0.153783	0.172633	0.208846
20.3	0.691201	0.404711	0.31342	0.224186	0.238152	0.155921	0.173398	0.210276
20.4	0.693138	0.404811	0.312439	0.224523	0.238412	0.155898	0.173019	0.207726
20.5	0.697589	0.404577	0.310783	0.227632	0.23972	0.156518	0.171852	0.209663
20.6	0.693666	0.406285	0.314209	0.226545	0.243337	0.156371	0.175283	0.210407
20.7	0.694675	0.402503	0.314497	0.228505	0.245125	0.158664	0.175518	0.212623
20.8	0.693854	0.409654	0.31587	0.230465	0.245058	0.159236	0.17663	0.211968
20.9	0.695974	0.407882	0.317652	0.229762	0.24453	0.158679	0.176556	0.214467
21	0.693588	0.409066	0.314945	0.230071	0.246085	0.160671	0.176628	0.214758
21.1	0.690479	0.409857	0.318072	0.229319	0.246268	0.161299	0.17959	0.216829
21.2	0.694858	0.408314	0.317168	0.231699	0.248218	0.161853	0.178379	0.219083
21.3	0.695343	0.413015	0.317179	0.233683	0.248236	0.160982	0.179495	0.219266
21.4	0.694039	0.409216	0.320151	0.231465	0.251232	0.162116	0.180427	0.220093
21.5	0.697439	0.413288	0.321542	0.235579	0.249949	0.163901	0.18231	0.219613
21.6	0.699647	0.41437	0.322348	0.233327	0.253058	0.166891	0.183312	0.221994
21.7	0.701398	0.415413	0.322426	0.235452	0.253439	0.165616	0.182019	0.22256
21.8	0.697743	0.413816	0.321385	0.23649	0.252334	0.166425	0.181962	0.221324
21.9	0.702547	0.414283	0.322624	0.238185	0.259052	0.167803	0.184564	0.224551
22	0.703039	0.416003	0.323067	0.238698	0.256811	0.166059	0.185509	0.225265
22.1	0.701684	0.415784	0.325321	0.237449	0.257115	0.169011	0.187179	0.225461
22.2	0.701419	0.418012	0.32555	0.239486	0.256126	0.169258	0.187294	0.224484
22.3	0.704994	0.417149	0.324916	0.239332	0.256554	0.170961	0.186962	0.227271
22.4	0.702455	0.415297	0.324852	0.238572	0.259086	0.17109	0.188549	0.22602
22.5	0.701785	0.421722	0.328157	0.240145	0.259135	0.172718	0.192232	0.229479
22.6	0.699997	0.419481	0.32777	0.238721	0.261721	0.172476	0.189705	0.226591
22.7	0.698938	0.421765	0.327096	0.241137	0.261404	0.172682	0.192219	0.229801
22.8	0.697756	0.418793	0.32902	0.242863	0.260904	0.17374	0.191506	0.230378
22.9	0.702748	0.421029	0.329058	0.242652	0.264222	0.174866	0.194241	0.229391
23	0.703835	0.420964	0.331006	0.244475	0.264657	0.17474	0.194478	0.230916
23.1	0.702498	0.423741	0.331709	0.245135	0.265538	0.17712	0.192603	0.23248
23.2	0.70367	0.424398	0.3338	0.245184	0.263459	0.178361	0.194381	0.232748
23.3	0.702952	0.426152	0.334782	0.244063	0.265062	0.179837	0.196658	0.233062
23.4	0.704636	0.425627	0.329741	0.244937	0.266154	0.177323	0.195362	0.233726
23.5	0.706529	0.42676	0.330807	0.247162	0.270285	0.178526	0.198538	0.236668
23.6	0.705504	0.424916	0.332873	0.247693	0.268408	0.182161	0.198025	0.237521
23.7	0.701955	0.428699	0.336356	0.249645	0.269822	0.181919	0.199532	0.236601
23.8	0.706102	0.430011	0.336374	0.248525	0.270811	0.183505	0.199476	0.238757
23.9	0.70756	0.427842	0.333813	0.250614	0.267779	0.18367	0.19947	0.238523
24	0.712384	0.431427	0.337628	0.250694	0.27104	0.183681	0.201078	0.242441
24.1	0.709718	0.429336	0.335691	0.249344	0.272114	0.184229	0.203844	0.2385
24.2	0.711218	0.428048	0.338192	0.252388	0.27189	0.185221	0.202131	0.241413
24.3	0.710756	0.431958	0.336075	0.254905	0.272125	0.186576	0.204202	0.242157
24.4	0.709512	0.429369	0.340729	0.25387	0.275983	0.187825	0.204207	0.243775
24.5	0.710025	0.432293	0.340518	0.253146	0.275174	0.189796	0.204954	0.245712
24.6	0.710633	0.435015	0.3382	0.253339	0.275782	0.19132	0.204661	0.244545
24.7	0.706233	0.436401	0.336894	0.255338	0.27631	0.186164	0.205294	0.245467
24.8	0.706349	0.43261	0.342473	0.255977	0.279566	0.189216	0.206567	0.243087
24.9	0.710406	0.436664	0.343689	0.25685	0.279394	0.19251	0.208032	0.244648
25	0.712031	0.434093	0.341997	0.257213	0.279517	0.190514	0.209591	0.247147
25.1	0.716405	0.43873	0.344372	0.2578	0.279298	0.19163	0.209158	0.245264
25.2	0.716078	0.4362	0.343328	0.257991	0.280146	0.193956	0.210887	0.246485
25.3	0.716279	0.435361	0.34397	0.259529	0.281382	0.191565	0.209869	0.25057
25.4	0.709909	0.439629	0.343264	0.257978	0.282289	0.195032	0.210101	0.251732
25.5	0.713234	0.438398	0.346829	0.258465	0.283175	0.193778	0.212929	0.250426
25.6	0.713345	0.441015	0.347826	0.261875	0.28523	0.195285	0.214091	0.252649
25.7	0.711511	0.440064	0.344547	0.258596	0.286284	0.195815	0.2133	0.253756
25.8	0.711048	0.443119	0.346131	0.261682	0.285838	0.197289	0.214091	0.252512
25.9	0.715687	0.442426	0.345685	0.260116	0.286348	0.200271	0.215598	0.253128
26	0.709641	0.4429	0.349333	0.260647	0.286902	0.19981	0.216273	0.254467
26.1	0.712946	0.444064	0.348083	0.261123	0.285712	0.198932	0.216291	0.255361
26.2	0.714983	0.442746	0.351739	0.262344	0.288934	0.200011	0.215142	0.255364
26.3	0.710669	0.444085	0.352862	0.264441	0.292165	0.199445	0.217864	0.256847
26.4	0.712565	0.44597	0.349997	0.263967	0.290302	0.199965	0.219552	0.257002
26.5	0.712874	0.444796	0.352073	0.265492	0.292206	0.199339	0.219546	0.258668
26.6	0.711581	0.445437	0.349912	0.265118	0.291456	0.200753	0.219567	0.25737
26.7	0.7142	0.4463	0.351808	0.266818	0.290426	0.204063	0.221138	0.259093
26.8	0.71096	0.445677	0.352367	0.262937	0.294166	0.204194	0.220208	0.259235
26.9	0.712021	0.450063	0.353202	0.267009	0.293919	0.204668	0.223874	0.260219
27	0.715761	0.447936	0.353771	0.268338	0.293254	0.203002	0.222344	0.261018
27.1	0.711483	0.452348	0.353351	0.267576	0.297826	0.207249	0.223088	0.26194
27.2	0.713773	0.450756	0.35748	0.270842	0.296487	0.206446	0.222622	0.263957
27.3	0.714033	0.450089	0.355288	0.267024	0.299887	0.20659	0.225422	0.26135
27.4	0.715648	0.447336	0.356398	0.26882	0.300745	0.206322	0.224842	0.262918
27.5	0.71528	0.453961	0.354701	0.270391	0.299251	0.207927	0.225329	0.263622
27.6	0.715383	0.451179	0.354389	0.271882	0.298437	0.210333	0.22868	0.264933
27.7	0.714716	0.449922	0.359309	0.271733	0.300657	0.211484	0.226069	0.264096
27.8	0.714157	0.450762	0.360674	0.271658	0.301505	0.208785	0.227663	0.268457
27.9	0.713976	0.453044	0.356988	0.27173	0.30128	0.212368	0.229572	0.264062
28	0.715944	0.451243	0.357511	0.272372	0.300884	0.212411	0.229093	0.268557
28.1	0.717487	0.453956	0.359131	0.273564	0.302769	0.213965	0.229054	0.266192
28.2	0.717515	0.454996	0.358915	0.274342	0.301917	0.215453	0.229762	0.270412
28.3	0.71843	0.454705	0.359461	0.27292	0.30219	0.214964	0.231419	0.269531
28.4	0.718255	0.45522	0.361068	0.273513	0.303259	0.215992	0.232794	0.26791
28.5	0.716197	0.457209	0.360095	0.275427	0.305028	0.215144	0.233497	0.271532
28.6	0.716441	0.459695	0.357779	0.277549	0.303573	0.217246	0.234484	0.269636
28.7	0.721122	0.455903	0.359008	0.274239	0.305131	0.217107	0.231815	0.271839
28.8	0.717469	0.456864	0.363245	0.276746	0.307692	0.216324	0.233528	0.270726
28.9	0.715573	0.457902	0.361913	0.279489	0.306543	0.218828	0.235427	0.273008
29	0.716735	0.458912	0.362261	0.277243	0.307622	0.21874	0.234986	0.270316
29.1	0.713786	0.462366	0.364461	0.280831	0.311697	0.217148	0.234716	0.272323
29.2	0.718275	0.458324	0.366434	0.278319	0.309742	0.218946	0.236019	0.273147
29.3	0.717121	0.457286	0.363739	0.278358	0.31164	0.217349	0.237057	0.274623
29.4	0.717595	0.456189	0.367075	0.280609	0.307383	0.221133	0.237116	0.277629
29.5	0.716526	0.46184	0.36836	0.280671	0.31026	0.22078	0.238087	0.277155
29.6	0.713621	0.463352	0.365081	0.280965	0.311692	0.22263	0.239715	0.277163
29.7	0.716212	0.461956	0.367528	0.281181	0.313449	0.223681	0.240321	0.277204
29.8	0.717974	0.463839	0.368685	0.281318	0.313639	0.221715	0.238559	0.279396
29.9	0.714229	0.45927	0.370645	0.280117	0.314286	0.22171	0.24165	0.277815

## Sheet: primary data n=3
time	L	DL	DDL	DDDL	LDDD	DLDD	DDLD	DDDL
0	0.00938407	0.0048566	0.0045069	0.00483191	0.00331178	0.00380958	0.0034496	0.00398237
0.1	0.013821	0.00664825	0.00534616	0.00601675	0.00377461	0.00399882	0.00401322	0.00473112
0.2	0.0197288	0.00815398	0.00674287	0.00660711	0.00417984	0.00480517	0.00479694	0.00577608
0.3	0.0249083	0.0104414	0.00766235	0.0076315	0.00465501	0.00503556	0.00526183	0.00621628
0.4	0.031392	0.0129756	0.00890684	0.00832677	0.00538319	0.00577814	0.0056218	0.00695269
0.5	0.0379744	0.0155983	0.0103858	0.00944372	0.00566706	0.00607846	0.00653511	0.00749574
0.6	0.0445548	0.0178013	0.0114329	0.0104126	0.00619365	0.00676344	0.0069424	0.00863532
0.7	0.0529659	0.0208869	0.012881	0.0109824	0.00672436	0.00705965	0.00759242	0.00921745
0.8	0.059791	0.024682	0.01436	0.0120541	0.00726124	0.00760887	0.00801205	0.0097893
0.9	0.0679677	0.0272574	0.0154666	0.0130353	0.00776109	0.00808198	0.00832265	0.0107911
1	0.0753235	0.0302133	0.0174949	0.01364	0.00775698	0.00890479	0.00933676	0.0111305
1.1	0.0845183	0.0344528	0.0183218	0.0145636	0.0096124	0.00905289	0.0097749	0.0118278
1.2	0.0932853	0.0371598	0.0203274	0.0156456	0.00930796	0.00951778	0.010211	0.0132142
1.3	0.0997731	0.0410846	0.0223617	0.0164519	0.0102377	0.0100526	0.0105483	0.0132451
1.4	0.108867	0.0452706	0.0241616	0.0172604	0.0108898	0.0102562	0.0111202	0.0146562
1.5	0.118453	0.0500038	0.0260685	0.0187681	0.0117908	0.0111696	0.0121487	0.0149174
1.6	0.124377	0.0536241	0.0276009	0.0195148	0.0124326	0.0119039	0.0124202	0.015839
1.7	0.133907	0.057553	0.0299254	0.0205763	0.0133952	0.01198	0.0131936	0.0163861
1.8	0.141561	0.0611404	0.0317026	0.0218454	0.0141604	0.012881	0.0141502	0.0176286
1.9	0.149423	0.0653594	0.0334819	0.0229418	0.0152342	0.0135084	0.0140617	0.0181099
2	0.157602	0.069496	0.0356665	0.0240012	0.0158328	0.0137799	0.0147302	0.0191487
2.1	0.165026	0.0737869	0.0375075	0.0250153	0.0168551	0.0142324	0.015442	0.0190047
2.2	0.174638	0.0773641	0.0393279	0.0262248	0.0175998	0.0148537	0.0161043	0.0205022
2.3	0.179731	0.0823029	0.0419774	0.0269756	0.0192886	0.0155016	0.0171678	0.0212612
2.4	0.189255	0.0858287	0.0438945	0.0281378	0.0200579	0.0162874	0.0173344	0.0222219
2.5	0.196446	0.0899159	0.0451081	0.0295818	0.0206853	0.0164561	0.0178157	0.0228698
2.6	0.205978	0.0938057	0.0489547	0.0304787	0.0218022	0.0173118	0.0183053	0.0237338
2.7	0.212785	0.0988022	0.0508246	0.0323362	0.0226374	0.0176923	0.0190767	0.0245463
2.8	0.220398	0.1024	0.0528528	0.0331919	0.0241904	0.0185563	0.0203232	0.0255789
2.9	0.227406	0.107228	0.0562016	0.0343376	0.0254575	0.0187825	0.0209362	0.0263071
3	0.234814	0.112743	0.0582257	0.036012	0.0257003	0.0196815	0.0214854	0.0269941
3.1	0.239629	0.116299	0.0608771	0.0368657	0.027134	0.020496	0.0219874	0.0282571
3.2	0.250681	0.122859	0.0619201	0.0370776	0.0286911	0.020278	0.0231084	0.0289215
3.3	0.255277	0.125901	0.0655301	0.0391901	0.0293802	0.0215554	0.0236371	0.0305486
3.4	0.263338	0.127977	0.0666162	0.0407905	0.0300529	0.0226024	0.0242912	0.0310978
3.5	0.270735	0.132702	0.0711869	0.0414857	0.0323464	0.0243529	0.0247314	0.0314846
3.6	0.276984	0.136713	0.0711828	0.0433309	0.0330067	0.0232298	0.026305	0.0323135
3.7	0.283563	0.141181	0.0750911	0.0448099	0.0342039	0.0244064	0.0268542	0.0337905
3.8	0.290283	0.145776	0.0774978	0.0454023	0.0351748	0.0255254	0.0276812	0.0349115
3.9	0.296802	0.150715	0.0794869	0.0464658	0.0376021	0.0255768	0.0281934	0.0354875
4	0.302822	0.153856	0.0834837	0.0488025	0.037635	0.02598	0.0288722	0.03695
4.1	0.308555	0.157493	0.0847076	0.0493826	0.0388075	0.02735	0.0295921	0.0378366
4.2	0.314445	0.162489	0.0879062	0.0513985	0.0412142	0.0280782	0.0310402	0.0391634
4.3	0.319735	0.166616	0.089737	0.0522912	0.0428516	0.0285862	0.031211	0.0397311
4.4	0.327437	0.170108	0.0907264	0.0542022	0.0437402	0.029226	0.0324946	0.0408913
4.5	0.335078	0.17347	0.0937769	0.0552553	0.0445651	0.0301516	0.0331302	0.0429092
4.6	0.340202	0.179564	0.0978066	0.0560432	0.0468525	0.0306823	0.0337987	0.0437814
4.7	0.345075	0.182452	0.0989956	0.0586227	0.0482245	0.0319042	0.0350946	0.0445157
4.8	0.354301	0.186671	0.101513	0.0584417	0.0493229	0.0322601	0.0367094	0.0451349
4.9	0.357584	0.19103	0.104517	0.0606365	0.0502054	0.0331055	0.0368698	0.0459083
5	0.36032	0.196576	0.107991	0.0609101	0.0517975	0.0339571	0.0376247	0.04727
5.1	0.367935	0.198238	0.108252	0.063074	0.0542474	0.0347141	0.038213	0.0478028
5.2	0.374258	0.202346	0.110496	0.0656165	0.0555001	0.0351296	0.0389947	0.0498351
5.3	0.378582	0.206834	0.113625	0.0660361	0.0576579	0.0356603	0.0404202	0.0508863
5.4	0.385245	0.20936	0.1172	0.0685498	0.059139	0.0365715	0.0420411	0.0519518
5.5	0.387314	0.213912	0.117616	0.068558	0.0599289	0.0378201	0.0433226	0.0537722
5.6	0.390832	0.215663	0.120096	0.0694528	0.0616197	0.0384743	0.043337	0.0548789
5.7	0.397027	0.218228	0.124038	0.0718122	0.063469	0.0393403	0.0443203	0.0554425
5.8	0.402332	0.224257	0.125934	0.0738013	0.0644131	0.0406444	0.0455586	0.0567796
5.9	0.408394	0.229227	0.129067	0.0755621	0.0660505	0.0402083	0.047089	0.0581496
6	0.410167	0.232094	0.130889	0.0756444	0.0681857	0.0424032	0.0471302	0.058958
6.1	0.417422	0.233577	0.132885	0.0777508	0.0688501	0.0433576	0.0480003	0.0606468
6.2	0.420372	0.239477	0.136291	0.077903	0.0708187	0.0431211	0.0486894	0.0617226
6.3	0.42369	0.240742	0.137754	0.0783041	0.0727893	0.0442462	0.0500696	0.0631234
6.4	0.428294	0.243509	0.139624	0.081583	0.0736923	0.0449724	0.0510117	0.0636603
6.5	0.432912	0.248505	0.142775	0.0829365	0.0760743	0.0464534	0.051201	0.0644337
6.6	0.436672	0.250877	0.143637	0.0837305	0.0775842	0.0479879	0.0529906	0.0664887
6.7	0.440625	0.254684	0.146449	0.085481	0.0802418	0.048496	0.0543647	0.0675151
6.8	0.446381	0.260954	0.149561	0.0882642	0.0804928	0.0488375	0.0553911	0.0684058
6.9	0.44773	0.262536	0.151163	0.0886858	0.0826794	0.0504954	0.0557717	0.0703908
7	0.451221	0.265636	0.15247	0.0901731	0.0855201	0.0513409	0.0577196	0.0715242
7.1	0.453465	0.266946	0.156861	0.0921684	0.0877376	0.0509891	0.059682	0.0729847
7.2	0.459931	0.271807	0.158383	0.0923	0.0878178	0.052789	0.0595566	0.0745419
7.3	0.459488	0.276491	0.160879	0.095005	0.089848	0.0537434	0.0609574	0.0743032
7.4	0.465462	0.278579	0.162574	0.0965395	0.0916047	0.0544469	0.0619591	0.0768354
7.5	0.46619	0.279303	0.165155	0.0978231	0.0940711	0.055891	0.0621114	0.0784584
7.6	0.473324	0.286936	0.166142	0.0990964	0.0948836	0.0569976	0.0635183	0.0785839
7.7	0.470273	0.289902	0.167879	0.0983394	0.0981254	0.057588	0.0652915	0.0808898
7.8	0.476592	0.289433	0.171941	0.102048	0.0990202	0.0592027	0.0666923	0.0816797
7.9	0.481142	0.294862	0.173869	0.101974	0.101162	0.0605624	0.0677126	0.0826526
8	0.482228	0.29588	0.176444	0.105611	0.102447	0.0610582	0.068846	0.0830743
8.1	0.483331	0.298371	0.17816	0.106436	0.103274	0.0625639	0.0704875	0.0860179
8.2	0.48829	0.302543	0.179102	0.107643	0.106421	0.063	0.0713905	0.0867687
8.3	0.492697	0.305768	0.182047	0.108293	0.108203	0.0643823	0.072094	0.0891116
8.4	0.492073	0.311264	0.185092	0.109608	0.110307	0.0654746	0.0735812	0.0883629
8.5	0.492444	0.312466	0.186385	0.111313	0.111011	0.0647772	0.0737417	0.0908066
8.6	0.498761	0.314039	0.188451	0.112202	0.111885	0.0674081	0.0754161	0.0910411
8.7	0.496442	0.316355	0.191637	0.11603	0.114662	0.0674863	0.077218	0.0932668
8.8	0.505738	0.321025	0.192686	0.114688	0.116141	0.068558	0.0770514	0.0954637
8.9	0.506773	0.322111	0.196331	0.117478	0.11728	0.0698416	0.0785098	0.0960191
9	0.508077	0.324697	0.198396	0.119728	0.118965	0.0705636	0.0807952	0.097461
9.1	0.509766	0.327745	0.198872	0.121429	0.122221	0.0714193	0.0826053	0.0983641
9.2	0.510438	0.328889	0.203352	0.120691	0.123859	0.0735792	0.082992	0.100331
9.3	0.512456	0.333941	0.203603	0.123935	0.124486	0.074077	0.0837716	0.100952
9.4	0.51304	0.33391	0.206522	0.12485	0.127442	0.0752844	0.0851272	0.101863
9.5	0.515387	0.33737	0.206694	0.126734	0.129559	0.0763911	0.0877828	0.104607
9.6	0.516188	0.341282	0.208934	0.127187	0.130036	0.0783021	0.088151	0.104101
9.7	0.523206	0.342914	0.211195	0.128281	0.132237	0.0784131	0.0885748	0.105381
9.8	0.521727	0.344691	0.214863	0.12991	0.133623	0.0780203	0.0912756	0.108024
9.9	0.52668	0.346678	0.215698	0.131589	0.134993	0.0808877	0.0922794	0.109601
10	0.523319	0.347044	0.216846	0.133574	0.137801	0.0806059	0.0918022	0.111344
10.1	0.527713	0.354626	0.218382	0.1364	0.139043	0.0826218	0.0942768	0.111864
10.2	0.527407	0.353565	0.222453	0.136314	0.140671	0.0841008	0.0954225	0.112956
10.3	0.52746	0.354904	0.22279	0.139654	0.142176	0.0844217	0.0963914	0.115351
10.4	0.531181	0.359339	0.224821	0.139782	0.143713	0.0857649	0.0976338	0.114958
10.5	0.531545	0.36105	0.225726	0.141901	0.146529	0.0868181	0.100026	0.116966
10.6	0.53374	0.360507	0.228462	0.143639	0.148166	0.088836	0.100981	0.119109
10.7	0.533709	0.367139	0.230218	0.145398	0.149302	0.0893359	0.100403	0.120444
10.8	0.530683	0.365242	0.232672	0.14569	0.150316	0.0903623	0.102743	0.120736
10.9	0.534538	0.371064	0.233415	0.147858	0.152583	0.0917426	0.104015	0.123741
11	0.537309	0.368898	0.235612	0.150044	0.154481	0.0939436	0.105586	0.124266
11.1	0.53771	0.37469	0.237305	0.152315	0.156051	0.0950091	0.107032	0.12536
11.2	0.541096	0.37627	0.239481	0.15305	0.158369	0.0953547	0.109036	0.125868
11.3	0.541937	0.378253	0.242081	0.154078	0.158348	0.0954267	0.109357	0.128713
11.4	0.543435	0.382019	0.24456	0.156314	0.161695	0.0958566	0.109838	0.129443
11.5	0.54219	0.381612	0.244296	0.156841	0.164306	0.0980596	0.111914	0.130875
11.6	0.544031	0.383702	0.245837	0.159665	0.165887	0.0979671	0.11214	0.132237
11.7	0.543352	0.38768	0.249089	0.159474	0.167903	0.101192	0.114814	0.133685
11.8	0.54332	0.386425	0.249842	0.16158	0.169845	0.102328	0.114843	0.134931
11.9	0.54664	0.389706	0.251881	0.163466	0.170614	0.103019	0.117064	0.13681
12	0.545346	0.387941	0.253796	0.166379	0.172192	0.103936	0.117572	0.137151
12.1	0.546191	0.394067	0.255452	0.164476	0.173391	0.105654	0.119858	0.136993
12.2	0.542916	0.393775	0.255229	0.167681	0.176321	0.107306	0.120767	0.139907
12.3	0.547903	0.395972	0.257521	0.168364	0.177888	0.107314	0.121872	0.141024
12.4	0.54696	0.398206	0.260395	0.170913	0.180702	0.110005	0.124441	0.142691
12.5	0.549429	0.399479	0.262641	0.173052	0.182072	0.109762	0.124077	0.142588
12.6	0.550211	0.401435	0.265002	0.174085	0.182535	0.111498	0.126564	0.145583
12.7	0.549075	0.403116	0.265835	0.175666	0.185232	0.112734	0.129713	0.145986
12.8	0.550824	0.406271	0.266775	0.175648	0.186785	0.114917	0.127925	0.146794
12.9	0.550797	0.405617	0.267265	0.17615	0.188126	0.114872	0.132288	0.149816
13	0.549299	0.40838	0.272568	0.179344	0.187529	0.116597	0.131755	0.150692
13.1	0.551262	0.409281	0.271517	0.181428	0.191254	0.117297	0.134061	0.151225
13.2	0.550418	0.412998	0.274053	0.181716	0.193404	0.118545	0.134166	0.151122
13.3	0.55417	0.410558	0.275526	0.181683	0.193445	0.1193	0.136431	0.15408
13.4	0.550846	0.413278	0.278023	0.183777	0.196362	0.121372	0.136596	0.156119
13.5	0.554372	0.41603	0.2772	0.184855	0.197578	0.123141	0.137922	0.156246
13.6	0.554849	0.415359	0.278186	0.187535	0.200137	0.122478	0.138307	0.157892
13.7	0.556085	0.420134	0.278889	0.187293	0.201706	0.124412	0.140413	0.159776
13.8	0.556256	0.419951	0.281534	0.190045	0.20119	0.125451	0.139963	0.161008
13.9	0.552414	0.420129	0.285081	0.189197	0.20256	0.126259	0.142909	0.161629
14	0.55749	0.421608	0.28397	0.191608	0.20681	0.127576	0.143756	0.165624
14.1	0.554409	0.424036	0.286934	0.19376	0.20705	0.129797	0.145184	0.164853
14.2	0.556816	0.424414	0.286373	0.194969	0.208361	0.131264	0.146998	0.165474
14.3	0.556501	0.427341	0.289456	0.196833	0.209375	0.132173	0.146887	0.168058
14.4	0.556729	0.428717	0.290468	0.196259	0.209819	0.133835	0.148835	0.168516
14.5	0.555435	0.430164	0.291453	0.198304	0.213768	0.135055	0.15091	0.168971
14.6	0.55387	0.429853	0.294675	0.199384	0.216	0.135563	0.150933	0.171223
14.7	0.558661	0.434127	0.294557	0.201519	0.21555	0.135172	0.153782	0.172906
14.8	0.56021	0.431928	0.294792	0.20228	0.217981	0.137754	0.15416	0.175234
14.9	0.560203	0.434267	0.29574	0.203907	0.218732	0.139747	0.155294	0.178137
15	0.556752	0.433064	0.298001	0.204864	0.220668	0.140366	0.157904	0.177403
15.1	0.556914	0.43675	0.299321	0.206024	0.222068	0.141713	0.15868	0.177656
15.2	0.559327	0.439628	0.30152	0.205699	0.226357	0.142995	0.159904	0.179959
15.3	0.557807	0.438706	0.300231	0.209782	0.22767	0.144147	0.161395	0.181235
15.4	0.559547	0.440101	0.303878	0.211261	0.228015	0.146626	0.163012	0.181539
15.5	0.559467	0.443388	0.306827	0.211576	0.229091	0.1468	0.163678	0.182658
15.6	0.560781	0.441031	0.304974	0.212246	0.233018	0.148041	0.1638	0.184703
15.7	0.559187	0.443452	0.30691	0.214021	0.231179	0.147788	0.166206	0.185285
15.8	0.557529	0.445959	0.308796	0.214885	0.23272	0.151774	0.167358	0.187924
15.9	0.558574	0.446914	0.307498	0.216206	0.235702	0.153093	0.16845	0.188663
16	0.560876	0.446945	0.310559	0.215527	0.235048	0.152887	0.170429	0.188241
16.1	0.558395	0.446856	0.311637	0.219382	0.237486	0.15401	0.171452	0.189981
16.2	0.561557	0.448603	0.311762	0.217868	0.239168	0.154841	0.172723	0.192197
16.3	0.561707	0.449578	0.312599	0.218975	0.243525	0.155816	0.173542	0.193585
16.4	0.560018	0.447813	0.316281	0.223691	0.244529	0.158492	0.175298	0.194823
16.5	0.562221	0.449781	0.316	0.222984	0.244013	0.159233	0.177024	0.194998
16.6	0.563034	0.45319	0.318711	0.226538	0.244512	0.159145	0.176919	0.197043
16.7	0.558556	0.452737	0.317359	0.225271	0.247538	0.162633	0.179616	0.196821
16.8	0.560617	0.454107	0.318404	0.227452	0.25076	0.161617	0.178886	0.199229
16.9	0.564073	0.453229	0.320821	0.230313	0.248931	0.164855	0.181457	0.201924
17	0.562409	0.454171	0.322687	0.229214	0.251626	0.165264	0.183185	0.202673
17.1	0.560378	0.455111	0.323728	0.233001	0.251008	0.165922	0.183672	0.202903
17.2	0.56016	0.456859	0.323135	0.233213	0.252654	0.168415	0.184987	0.205277
17.3	0.55965	0.456497	0.323189	0.234384	0.255698	0.168584	0.18792	0.206007
17.4	0.560432	0.458892	0.325696	0.235684	0.255083	0.1691	0.188155	0.207287
17.5	0.561909	0.460136	0.328479	0.236319	0.256429	0.170987	0.189415	0.206976
17.6	0.559971	0.458589	0.325881	0.236753	0.256371	0.17282	0.189559	0.209901
17.7	0.56067	0.4604	0.327128	0.237498	0.260374	0.174002	0.192756	0.210705
17.8	0.56202	0.462516	0.328665	0.238913	0.261546	0.176417	0.19297	0.212051
17.9	0.557665	0.461303	0.331184	0.239781	0.264681	0.175276	0.193659	0.210991
18	0.560648	0.464193	0.331565	0.242735	0.264517	0.177904	0.196664	0.212555
18.1	0.56188	0.464133	0.330294	0.242303	0.266913	0.176711	0.194025	0.214715
18.2	0.556089	0.465347	0.331454	0.243299	0.269085	0.179877	0.199433	0.215151
18.3	0.55793	0.466077	0.333684	0.245749	0.268876	0.180478	0.19803	0.216747
18.4	0.557762	0.465986	0.336138	0.246855	0.269604	0.182457	0.198913	0.218298
18.5	0.558638	0.468078	0.334377	0.247141	0.271465	0.184359	0.202336	0.218586
18.6	0.55799	0.471026	0.338067	0.249346	0.269622	0.184596	0.201379	0.220927
18.7	0.556711	0.466595	0.340361	0.247939	0.272856	0.184824	0.20446	0.221159
18.8	0.559337	0.466338	0.339094	0.250634	0.273533	0.186515	0.203508	0.220024
18.9	0.55546	0.469004	0.34176	0.252549	0.275896	0.188017	0.208011	0.22364
19	0.556036	0.472308	0.336808	0.250978	0.27806	0.188445	0.206838	0.223932
19.1	0.560002	0.472437	0.341753	0.255011	0.278632	0.189368	0.208334	0.224611
19.2	0.559379	0.471857	0.34011	0.255061	0.279951	0.191987	0.210794	0.228233
19.3	0.558418	0.471164	0.344349	0.254588	0.27929	0.193153	0.212172	0.22841
19.4	0.556955	0.471734	0.34273	0.256996	0.284114	0.192793	0.21202	0.227929
19.5	0.554133	0.473424	0.345437	0.257951	0.282715	0.195447	0.212812	0.230128
19.6	0.555236	0.477327	0.346332	0.260308	0.283396	0.196683	0.213616	0.231183
19.7	0.556598	0.474936	0.346641	0.259907	0.284309	0.196121	0.21528	0.231522
19.8	0.559161	0.473877	0.344436	0.260033	0.286025	0.198248	0.216352	0.233872
19.9	0.55857	0.476076	0.346931	0.262355	0.288255	0.198413	0.217037	0.233859
20	0.554432	0.478005	0.3492	0.261314	0.288327	0.200398	0.218131	0.235723
20.1	0.559	0.477263	0.348192	0.263976	0.290867	0.200038	0.22053	0.235974
20.2	0.556489	0.478631	0.348706	0.263624	0.290201	0.202897	0.220579	0.236969
20.3	0.556719	0.477032	0.351442	0.264484	0.292182	0.202338	0.223132	0.237654
20.4	0.556881	0.477866	0.349189	0.267242	0.293874	0.205016	0.223615	0.239119
20.5	0.558274	0.477022	0.351701	0.267271	0.293852	0.206956	0.224854	0.238891
20.6	0.559212	0.475926	0.352304	0.269832	0.296911	0.209163	0.225514	0.240762
20.7	0.555894	0.478022	0.355513	0.270725	0.29839	0.208194	0.226061	0.241303
20.8	0.555503	0.479997	0.352664	0.270834	0.296353	0.208659	0.227478	0.243867
20.9	0.55595	0.478863	0.353988	0.271939	0.299356	0.210074	0.22878	0.242414
21	0.554454	0.47983	0.354414	0.272043	0.300683	0.210475	0.230955	0.245029
21.1	0.558107	0.480315	0.354165	0.273531	0.301817	0.212972	0.232041	0.24711
21.2	0.555518	0.478479	0.358715	0.274555	0.301541	0.213954	0.231527	0.246931
21.3	0.555705	0.48106	0.357681	0.274547	0.302497	0.21355	0.232162	0.247509
21.4	0.552895	0.481128	0.359335	0.27597	0.303621	0.215605	0.233115	0.250328
21.5	0.554569	0.481558	0.357691	0.275853	0.304094	0.216459	0.234571	0.24963
21.6	0.555001	0.481733	0.361706	0.277595	0.305682	0.218864	0.235805	0.249612
21.7	0.552837	0.48243	0.359481	0.278449	0.307305	0.218964	0.236465	0.250949
21.8	0.556997	0.485252	0.360207	0.279722	0.307185	0.219664	0.239349	0.254053
21.9	0.552455	0.484419	0.357228	0.279632	0.307864	0.22041	0.239002	0.252197
22	0.555616	0.482572	0.360487	0.282777	0.310407	0.222579	0.241168	0.254771
22.1	0.554791	0.486754	0.358096	0.282625	0.310664	0.224485	0.24154	0.256093
22.2	0.550634	0.484185	0.362587	0.283456	0.311501	0.222023	0.241964	0.255476
22.3	0.551866	0.487496	0.361834	0.284427	0.312192	0.227112	0.243437	0.258477
22.4	0.551539	0.485771	0.363788	0.283869	0.314027	0.227083	0.243932	0.257142
22.5	0.55049	0.485261	0.364594	0.287948	0.312937	0.229033	0.246318	0.257025
22.6	0.549079	0.487531	0.36608	0.289168	0.313844	0.229737	0.245376	0.259566
22.7	0.550095	0.483249	0.366359	0.286278	0.314626	0.229031	0.247207	0.262015
22.8	0.54924	0.486978	0.365395	0.288946	0.318184	0.230597	0.247814	0.260462
22.9	0.5483	0.488434	0.367441	0.288586	0.319408	0.232888	0.247536	0.261343
23	0.551253	0.489718	0.366649	0.288117	0.318779	0.230554	0.249503	0.263357
23.1	0.549888	0.487887	0.368036	0.290655	0.320593	0.232703	0.25114	0.261158
23.2	0.547172	0.485616	0.366972	0.292371	0.317843	0.234855	0.250007	0.264733
23.3	0.55041	0.48769	0.368305	0.290273	0.322444	0.235307	0.250957	0.264591
23.4	0.546596	0.488558	0.368852	0.295623	0.321786	0.235949	0.254158	0.265257
23.5	0.549517	0.492806	0.369683	0.294901	0.323853	0.236107	0.255211	0.267475
23.6	0.546444	0.490053	0.373514	0.295382	0.324195	0.238481	0.257663	0.269847
23.7	0.546097	0.489325	0.372197	0.295718	0.326034	0.239376	0.256235	0.268682
23.8	0.548005	0.48965	0.369688	0.296026	0.323388	0.240184	0.25807	0.268756
23.9	0.54537	0.48872	0.370607	0.297544	0.325775	0.242087	0.258045	0.269297
24	0.5414	0.491172	0.371389	0.297474	0.324442	0.241925	0.257564	0.271782
24.1	0.545395	0.489467	0.373921	0.296349	0.325754	0.241838	0.258874	0.271984
24.2	0.544412	0.487754	0.371685	0.297692	0.330557	0.243225	0.260458	0.271474
24.3	0.549198	0.490522	0.37122	0.300346	0.32698	0.24579	0.261279	0.27212
24.4	0.544895	0.491481	0.370732	0.299196	0.328757	0.245327	0.262415	0.272551
24.5	0.545856	0.490767	0.372333	0.30165	0.332423	0.243953	0.264836	0.27509
24.6	0.544251	0.490144	0.375906	0.299323	0.331966	0.246977	0.263811	0.274816
24.7	0.541882	0.492487	0.374026	0.303106	0.333453	0.248122	0.263153	0.275335
24.8	0.5457	0.488467	0.373289	0.300206	0.330487	0.249157	0.265698	0.276248
24.9	0.541398	0.49246	0.374953	0.302829	0.332162	0.24853	0.265122	0.276943
25	0.545932	0.491051	0.373867	0.304972	0.332445	0.250509	0.265428	0.277367
25.1	0.540242	0.489233	0.373985	0.304227	0.335235	0.250235	0.268106	0.278247
25.2	0.541481	0.490271	0.377126	0.304571	0.335844	0.252599	0.267086	0.280023
25.3	0.540839	0.490724	0.37671	0.307161	0.335547	0.251543	0.269246	0.280477
25.4	0.542044	0.493042	0.379059	0.306811	0.338154	0.254001	0.270025	0.28001
25.5	0.541242	0.489066	0.378142	0.308444	0.338405	0.254509	0.270894	0.279829
25.6	0.541649	0.491752	0.37814	0.306786	0.340661	0.253989	0.270128	0.282557
25.7	0.540039	0.489564	0.375815	0.307062	0.339484	0.254684	0.272436	0.283007
25.8	0.539426	0.492084	0.378072	0.30664	0.3378	0.257764	0.269814	0.281191
25.9	0.541505	0.492061	0.379259	0.310483	0.340252	0.257179	0.274216	0.284416
26	0.540308	0.494124	0.380024	0.310913	0.340881	0.259397	0.272447	0.283458
26.1	0.537813	0.493624	0.380871	0.308907	0.340324	0.259278	0.277227	0.283388
26.2	0.540888	0.493447	0.380001	0.310614	0.34114	0.259761	0.275672	0.286455
26.3	0.538584	0.491997	0.378718	0.311487	0.341714	0.261242	0.277626	0.285305
26.4	0.537601	0.492814	0.379343	0.311723	0.341467	0.260374	0.279667	0.288843
26.5	0.537992	0.492528	0.378979	0.314438	0.343358	0.262293	0.275254	0.287343
26.6	0.536311	0.496837	0.380349	0.311916	0.343008	0.263346	0.276273	0.289598
26.7	0.534604	0.491594	0.381966	0.313626	0.344246	0.265809	0.279058	0.288267
26.8	0.537488	0.494128	0.381513	0.314992	0.344695	0.263787	0.27914	0.289845
26.9	0.538467	0.496031	0.379979	0.314932	0.345213	0.265282	0.282528	0.289413
27	0.537823	0.495132	0.380365	0.314804	0.346844	0.266979	0.280506	0.29091
27.1	0.534485	0.494758	0.38297	0.315508	0.346491	0.266537	0.28009	0.289145
27.2	0.536112	0.490946	0.382544	0.316981	0.345758	0.268738	0.282651	0.289894
27.3	0.535966	0.495601	0.381435	0.316043	0.346112	0.269995	0.283057	0.292576
27.4	0.535326	0.493563	0.382575	0.315572	0.348827	0.269929	0.282851	0.291651
27.5	0.533154	0.494155	0.383126	0.320657	0.347986	0.26919	0.284443	0.291285
27.6	0.535725	0.495607	0.384568	0.318731	0.348653	0.270828	0.281629	0.293202
27.7	0.531909	0.492209	0.3845	0.320581	0.350197	0.271694	0.286839	0.293453
27.8	0.534156	0.496591	0.382865	0.320179	0.34957	0.271165	0.286737	0.295211
27.9	0.533109	0.493881	0.382754	0.319992	0.350115	0.271326	0.286778	0.291729
28	0.532969	0.493906	0.386102	0.32042	0.351516	0.273691	0.287014	0.294512
28.1	0.532222	0.493964	0.384132	0.321953	0.352261	0.272173	0.289071	0.295822
28.2	0.531654	0.496019	0.383488	0.322119	0.350125	0.272959	0.2894	0.297902
28.3	0.530687	0.494359	0.3876	0.320723	0.352127	0.27532	0.289057	0.295775
28.4	0.532131	0.493721	0.38631	0.320934	0.353065	0.277554	0.2898	0.295629
28.5	0.530478	0.494965	0.385374	0.324569	0.353966	0.276653	0.288403	0.296211
28.6	0.529196	0.493869	0.38609	0.324283	0.353326	0.277209	0.290524	0.297968
28.7	0.531844	0.496375	0.385555	0.324746	0.354994	0.276534	0.292402	0.295855
28.8	0.527409	0.496292	0.386271	0.325941	0.355035	0.27697	0.292581	0.299951
28.9	0.529027	0.494653	0.383511	0.325024	0.355439	0.279348	0.292945	0.299862
29	0.528916	0.494682	0.38521	0.32777	0.355838	0.279457	0.294276	0.299673
29.1	0.526709	0.492333	0.385712	0.323989	0.358929	0.280401	0.293451	0.300613
29.2	0.527655	0.491543	0.385798	0.325579	0.356013	0.281131	0.295462	0.301518
29.3	0.529581	0.495883	0.389003	0.32654	0.357668	0.283252	0.29581	0.301356
29.4	0.527343	0.493017	0.389141	0.325925	0.356467	0.280621	0.29647	0.302919
29.5	0.525568	0.495019	0.385917	0.323493	0.357239	0.28311	0.295715	0.301588
29.6	0.525821	0.497677	0.38717	0.328251	0.355644	0.283174	0.297063	0.300794
29.7	0.524134	0.498592	0.384897	0.32685	0.355194	0.284556	0.295232	0.302787
29.8	0.526129	0.495037	0.387775	0.32957	0.3593	0.285278	0.295907	0.304122
29.9	0.522943	0.494573	0.388075	0.326451	0.358792	0.2854	0.296557	0.303154

## Sheet: secondary data n=1-3
PCP	A	k1	k2	A	k1	k2	A	k1	k2	A avrg	A SEM	k1 avrg	k1 SEM	k2 avrg	k2 SEM
L	0.726819	1.02804	0.228286	0.709913	1.38849	0.155051	0.549047	0.614321	0.300073	0.661926	0.0566503	1.01028	0.22366	0.227803	0.0418648
DL	0.514905	0.826442	0.136886	0.492703	1.16692	0.0830975	0.495197	0.452998	0.151969	0.500935	0.00702189	0.815455	0.206166	0.123984	0.0209018
DDL	0.431854	0.626576	0.0986546	0.412112	0.746565	0.0681335	0.403542	0.307164	0.110404	0.415836	0.00838258	0.560102	0.131126	0.0923975	0.0125973
DDDL (len)	0.403568	0.428219	0.0631818	0.394786	1.31696	0.0396444	0.381427	0.173754	0.0790711	0.39326	0.00643701	0.639644	0.346532	0.0606324	0.0114527
LDDD	0.406159	0.256815	0.0689386	0.500238	0.344199	0.0352854	0.42092	0.115026	0.115026	0.442439	0.029212	0.23868	0.0667752	0.0730833	0.0231122
DLDD	0.528414	0.253389	0.0270454	0.479305	0.181131	0.0233419	0.430199	0.0748041	0.0748041	0.479306	0.0283523	0.169775	0.0518649	0.0417305	0.0165713
DDLD	0.3993	0.203612	0.0544421	0.402895	0.181752	0.0335266	0.406493	0.0859077	0.0859077	0.402896	0.00207642	0.15709	0.0361465	0.0579588	0.015223
DDDL (position)	0.377279	0.260291	0.0620593	0.558669	0.486998	0.0234378	0.365846	0.102544	0.102544	0.433931	0.0624561	0.283278	0.111576	0.0626804	0.0228381
