# Supplementary material for: Towards a molecular mechanism underlying mitochondrial protein import through the TOM and TIM23 complexes
Source: eLife. 2022 Jun 8;11:e75426. doi: 10.7554/eLife.75426 (PMC9255969; doi:10.7554/eLife.75426)
Supplement: Figure 4—source data 2. [file elife-75426-fig4-data2.xlsx]

## Sheet: primary data n=1
time	L	DL	DDL	DDDL	LDDD	DLDD	DDLD	DDDL
0	0.01218	0.00675288	0.00546859	0.00597954	0.00315963	0.00374239	0.00386668	0.00419258
0.1	0.0210789	0.00934355	0.00591878	0.00745164	0.00356839	0.00426715	0.00419811	0.00501011
0.2	0.0330048	0.0135555	0.00844317	0.0086365	0.00408763	0.00483058	0.00556525	0.00561497
0.3	0.0491814	0.0192008	0.0100119	0.0105036	0.00541059	0.00549344	0.00575859	0.00599611
0.4	0.0653524	0.027296	0.0134809	0.0123098	0.00648221	0.00631649	0.00657611	0.00683297
0.5	0.0859258	0.0372831	0.0172951	0.0138317	0.00812002	0.00705392	0.00727764	0.00812002
0.6	0.106129	0.0475104	0.0210099	0.0155689	0.00931317	0.00829678	0.00810897	0.00924688
0.7	0.127371	0.0600523	0.0259399	0.0181817	0.011647	0.00923583	0.00888507	0.00994288
0.8	0.148138	0.0721632	0.0314444	0.0201537	0.013735	0.0102881	0.0099926	0.0113625
0.9	0.168952	0.0874007	0.0365705	0.0234376	0.0163671	0.0118348	0.011357	0.0128871
1	0.195126	0.10137	0.0442182	0.0260504	0.0200101	0.0130362	0.0122408	0.0140112
1.1	0.215363	0.11513	0.0505706	0.0278926	0.0227499	0.0141023	0.0133787	0.016171
1.2	0.235575	0.130271	0.057782	0.0317675	0.0262906	0.0154584	0.0151298	0.0171736
1.3	0.25852	0.14442	0.0652308	0.0351674	0.029163	0.0175713	0.0159197	0.0188942
1.4	0.279842	0.158611	0.0736464	0.0386281	0.0340654	0.0193748	0.01761	0.0216258
1.5	0.301062	0.173727	0.0827165	0.0426771	0.0377388	0.0205486	0.0192367	0.0226118
1.6	0.318959	0.190403	0.0895909	0.0459941	0.0420059	0.022308	0.0201371	0.02457
1.7	0.340334	0.204489	0.0986279	0.0505872	0.0459306	0.025741	0.0221671	0.027191
1.8	0.359189	0.219442	0.107466	0.0534817	0.0526255	0.0266193	0.0243545	0.0285886
1.9	0.376294	0.233368	0.11529	0.0574174	0.0562602	0.0291354	0.0257051	0.0301546
2	0.392901	0.246697	0.124209	0.0616072	0.0608311	0.0308008	0.0277434	0.0336263
2.1	0.410666	0.259101	0.13292	0.0650789	0.065496	0.0331126	0.0300551	0.035463
2.2	0.434465	0.272664	0.142158	0.0703597	0.0718346	0.0345432	0.030776	0.0373825
2.3	0.445507	0.28691	0.151066	0.0744252	0.0767591	0.0382	0.032643	0.0399511
2.4	0.463358	0.301032	0.15873	0.0777754	0.0817416	0.0402273	0.0350431	0.043072
2.5	0.478374	0.314767	0.168035	0.0831998	0.0870582	0.0429201	0.0373024	0.0456268
2.6	0.490162	0.326513	0.177422	0.0855364	0.0931676	0.0457897	0.0394622	0.047933
2.7	0.508103	0.337705	0.184998	0.0916651	0.100048	0.0464056	0.042017	0.0492808
2.8	0.518328	0.34963	0.192914	0.0962582	0.106295	0.0492642	0.0438343	0.0525233
2.9	0.532146	0.364832	0.201923	0.101652	0.111965	0.0528906	0.0459168	0.0557796
3	0.54624	0.369969	0.211231	0.105654	0.120151	0.0559481	0.0483638	0.0585194
3.1	0.558939	0.385295	0.219522	0.110145	0.127587	0.0576604	0.0501618	0.0609941
3.2	0.567103	0.393959	0.225632	0.113882	0.132238	0.0616293	0.0530619	0.0632699
3.3	0.584015	0.404383	0.235605	0.119502	0.137883	0.0641344	0.054487	0.0660125
3.4	0.593723	0.413751	0.244879	0.124949	0.145658	0.0654684	0.0569009	0.0684816
3.5	0.603737	0.422937	0.252107	0.129288	0.152828	0.0696195	0.0600191	0.0723538
3.6	0.615738	0.434189	0.262578	0.134685	0.157139	0.0727736	0.0631787	0.0747291
3.7	0.62475	0.442831	0.269311	0.138074	0.166074	0.0767011	0.0658467	0.0782698
3.8	0.635256	0.453801	0.277354	0.142758	0.170852	0.078709	0.0678436	0.0829154
3.9	0.64328	0.461524	0.282582	0.148583	0.180102	0.0807859	0.0711137	0.0838434
4	0.650474	0.466509	0.292539	0.153852	0.186429	0.0857767	0.072514	0.0877459
4.1	0.664055	0.478802	0.29801	0.157357	0.194836	0.0885939	0.0753698	0.089497
4.2	0.675323	0.487251	0.306177	0.164767	0.200755	0.0908752	0.0785239	0.092571
4.3	0.680005	0.496901	0.316515	0.167441	0.206392	0.0955263	0.0804296	0.0976253
4.4	0.687434	0.501099	0.317733	0.174012	0.214479	0.0985947	0.082943	0.0985285
4.5	0.697794	0.50915	0.330361	0.176367	0.223046	0.102503	0.0871825	0.103373
4.6	0.704525	0.518637	0.334172	0.181209	0.230879	0.10577	0.0903477	0.104856
4.7	0.713515	0.522327	0.340958	0.187934	0.23642	0.109267	0.092919	0.110673
4.8	0.72271	0.528243	0.34583	0.193593	0.245821	0.112545	0.095239	0.112982
4.9	0.727247	0.536231	0.357074	0.199902	0.250967	0.117025	0.0983655	0.115848
5	0.737897	0.543122	0.363164	0.202893	0.260158	0.118942	0.102141	0.120511
5.1	0.744493	0.552498	0.368961	0.208627	0.26526	0.122599	0.105519	0.122814
5.2	0.751936	0.555669	0.375913	0.213211	0.272526	0.127553	0.108538	0.128178
5.3	0.755756	0.560403	0.386635	0.219199	0.284165	0.131793	0.111932	0.130801
5.4	0.76439	0.567305	0.387905	0.224983	0.287811	0.136759	0.11531	0.135643
5.5	0.767516	0.576174	0.397522	0.231462	0.295458	0.139836	0.118119	0.139129
5.6	0.778108	0.58378	0.399016	0.234163	0.30259	0.142393	0.121502	0.141855
5.7	0.776705	0.585547	0.406595	0.242435	0.309163	0.145707	0.125565	0.145426
5.8	0.788435	0.590908	0.413478	0.242949	0.317755	0.152372	0.129053	0.149232
5.9	0.796323	0.595772	0.418617	0.251516	0.320705	0.154435	0.132207	0.152295
6	0.801673	0.604138	0.421672	0.254367	0.330021	0.157139	0.134917	0.156794
6.1	0.804573	0.607767	0.430908	0.262067	0.337754	0.162903	0.137817	0.160785
6.2	0.810442	0.612321	0.43417	0.265757	0.343452	0.166789	0.143456	0.165985
6.3	0.815049	0.620339	0.442403	0.270982	0.35152	0.169684	0.144186	0.167781
6.4	0.817308	0.621955	0.441881	0.273904	0.355784	0.174125	0.149604	0.174108
6.5	0.825309	0.628122	0.444903	0.283532	0.365429	0.178707	0.153002	0.176925
6.6	0.833598	0.634762	0.452929	0.287222	0.371789	0.185681	0.158009	0.182562
6.7	0.836973	0.639662	0.460079	0.290263	0.375402	0.188061	0.160277	0.185838
6.8	0.843303	0.646669	0.465189	0.294751	0.384958	0.194505	0.163475	0.189995
6.9	0.845963	0.646249	0.471295	0.29919	0.388032	0.195632	0.167996	0.191947
7	0.853809	0.654319	0.476609	0.304968	0.395658	0.202034	0.172473	0.196532
7.1	0.850934	0.65612	0.481244	0.311635	0.402433	0.204517	0.174743	0.202984
7.2	0.856146	0.662331	0.484566	0.315786	0.405369	0.208176	0.181933	0.205216
7.3	0.86065	0.66756	0.486406	0.32339	0.413525	0.21591	0.183297	0.212162
7.4	0.862617	0.670816	0.494338	0.326999	0.421007	0.219887	0.188929	0.214189
7.5	0.869038	0.671885	0.495332	0.331822	0.426925	0.224259	0.192555	0.221074
7.6	0.876051	0.676666	0.498801	0.333197	0.433626	0.228794	0.197626	0.223143
7.7	0.880511	0.684338	0.507673	0.340221	0.437241	0.231512	0.201487	0.228145
7.8	0.88461	0.689401	0.507778	0.345347	0.442022	0.235644	0.205514	0.229971
7.9	0.881362	0.68918	0.513078	0.349034	0.44754	0.241173	0.20864	0.238088
8	0.890173	0.693433	0.515704	0.355627	0.450225	0.245835	0.210745	0.240698
8.1	0.897262	0.695762	0.52196	0.361678	0.457254	0.248335	0.217213	0.246097
8.2	0.893299	0.697618	0.523018	0.362821	0.463626	0.253066	0.220798	0.248486
8.3	0.898003	0.703271	0.528191	0.37111	0.471367	0.257192	0.225358	0.254731
8.4	0.905645	0.710681	0.532582	0.369392	0.472292	0.263045	0.229233	0.255949
8.5	0.908628	0.710977	0.537871	0.374968	0.477471	0.267146	0.234536	0.260959
8.6	0.905758	0.718067	0.537852	0.384301	0.484633	0.27133	0.237047	0.266906
8.7	0.91179	0.717432	0.54057	0.383696	0.489311	0.276183	0.23993	0.270643
8.8	0.913889	0.718116	0.543854	0.391059	0.491825	0.279809	0.245366	0.274888
8.9	0.916858	0.724215	0.549209	0.391374	0.496572	0.282936	0.248707	0.279163
9	0.921645	0.728637	0.551789	0.395556	0.502933	0.286775	0.254759	0.283361
9.1	0.925232	0.729493	0.55713	0.402079	0.50419	0.29429	0.257465	0.28804
9.2	0.930088	0.736674	0.559309	0.403546	0.508507	0.295235	0.261142	0.289236
9.3	0.930137	0.740424	0.560497	0.407796	0.518582	0.302777	0.267165	0.295936
9.4	0.931427	0.743316	0.564181	0.413552	0.517571	0.306531	0.269361	0.302391
9.5	0.929613	0.743498	0.566791	0.416079	0.52594	0.310431	0.275338	0.303567
9.6	0.933438	0.744565	0.572583	0.418836	0.528185	0.314471	0.278566	0.308039
9.7	0.940793	0.745501	0.573359	0.423277	0.529909	0.317056	0.280859	0.311621
9.8	0.942334	0.752505	0.575955	0.42885	0.534894	0.323757	0.289366	0.316786
9.9	0.938227	0.754679	0.582159	0.4309	0.53947	0.325685	0.28952	0.318738
10	0.943602	0.75443	0.581468	0.432098	0.54342	0.329753	0.295105	0.322207
10.1	0.941224	0.760426	0.586072	0.440119	0.546419	0.33354	0.299195	0.327182
10.2	0.947154	0.760813	0.587743	0.439904	0.546839	0.337906	0.304307	0.33307
10.3	0.948369	0.765218	0.590047	0.445488	0.55112	0.342792	0.306495	0.33734
10.4	0.951675	0.765514	0.590908	0.447629	0.555434	0.345151	0.311444	0.338022
10.5	0.954061	0.771733	0.598573	0.452619	0.560787	0.350067	0.314789	0.343303
10.6	0.951407	0.773313	0.597236	0.452873	0.56261	0.35701	0.320578	0.344634
10.7	0.954622	0.770068	0.597252	0.457185	0.562792	0.358085	0.322194	0.350224
10.8	0.955091	0.776368	0.601155	0.460759	0.565883	0.363531	0.328919	0.350407
10.9	0.959314	0.778666	0.6078	0.465852	0.567043	0.364956	0.331233	0.357231
11	0.96249	0.780069	0.608764	0.465827	0.575356	0.367042	0.335506	0.360128
11.1	0.958618	0.78208	0.610407	0.470124	0.577632	0.371966	0.338914	0.362948
11.2	0.964877	0.785908	0.616064	0.472428	0.578546	0.37604	0.342397	0.365506
11.3	0.961966	0.78063	0.61597	0.4768	0.579725	0.377471	0.346559	0.370475
11.4	0.963402	0.790937	0.615669	0.478628	0.586649	0.381412	0.349448	0.371085
11.5	0.963789	0.788976	0.619527	0.482962	0.58626	0.384014	0.351083	0.373129
11.6	0.968116	0.790619	0.622692	0.485663	0.5899	0.38812	0.358745	0.377777
11.7	0.967031	0.794097	0.626054	0.486657	0.593565	0.38986	0.361399	0.380859
11.8	0.968448	0.792547	0.62293	0.489438	0.597145	0.39347	0.366497	0.385127
11.9	0.968663	0.79603	0.627714	0.494888	0.598009	0.403247	0.370011	0.387601
12	0.969856	0.799024	0.631205	0.496131	0.602994	0.40541	0.370524	0.391037
12.1	0.972077	0.801048	0.634199	0.497357	0.600578	0.407968	0.377056	0.392736
12.2	0.969467	0.797762	0.63342	0.501099	0.607648	0.408719	0.379064	0.395404
12.3	0.974999	0.802918	0.642277	0.500014	0.604276	0.414295	0.378788	0.399419
12.4	0.976645	0.804457	0.637692	0.506281	0.614669	0.415488	0.386226	0.401894
12.5	0.975115	0.802338	0.638676	0.509355	0.611324	0.420838	0.39009	0.404703
12.6	0.976654	0.808666	0.645318	0.510716	0.616395	0.418855	0.391658	0.407214
12.7	0.977198	0.809378	0.64357	0.515249	0.622121	0.422959	0.394755	0.410094
12.8	0.981067	0.811715	0.647934	0.51513	0.619737	0.42632	0.400135	0.410752
12.9	0.976957	0.812107	0.64784	0.519944	0.620378	0.428845	0.400204	0.41324
13	0.976212	0.81475	0.650231	0.518008	0.624725	0.431223	0.406606	0.415919
13.1	0.982835	0.810779	0.648569	0.523117	0.624675	0.437227	0.407481	0.420363
13.2	0.97232	0.818636	0.654838	0.523338	0.625844	0.438829	0.414	0.418872
13.3	0.982793	0.816264	0.654245	0.52296	0.632144	0.440473	0.414091	0.423274
13.4	0.978565	0.812102	0.655291	0.528834	0.633011	0.443466	0.416228	0.424492
13.5	0.981945	0.817645	0.654338	0.529014	0.63635	0.443618	0.422363	0.427663
13.6	0.980932	0.821111	0.661097	0.534775	0.634964	0.454136	0.422473	0.429033
13.7	0.983257	0.814836	0.660956	0.535344	0.639322	0.453998	0.427947	0.434998
13.8	0.97923	0.826058	0.665085	0.53862	0.642918	0.457994	0.427853	0.437031
13.9	0.986547	0.82337	0.666549	0.539625	0.638405	0.458044	0.431342	0.4401
14	0.979512	0.822434	0.664309	0.540216	0.640333	0.463413	0.434333	0.437487
14.1	0.980846	0.822937	0.665237	0.544464	0.642092	0.464416	0.434808	0.440586
14.2	0.980134	0.821398	0.66532	0.542818	0.647312	0.465175	0.440094	0.446325
14.3	0.977888	0.827538	0.667886	0.546671	0.648859	0.466666	0.443999	0.443071
14.4	0.9836	0.831048	0.6717	0.54682	0.653689	0.47264	0.441296	0.44324
14.5	0.981915	0.829689	0.672816	0.554354	0.655496	0.475195	0.446499	0.448048
14.6	0.977303	0.829665	0.676403	0.547102	0.657515	0.476024	0.451266	0.451501
14.7	0.984879	0.825624	0.676851	0.552173	0.655222	0.475869	0.449305	0.451865
14.8	0.979915	0.831766	0.674103	0.555073	0.660467	0.481636	0.451172	0.45521
14.9	0.98086	0.827403	0.678212	0.555001	0.65855	0.479598	0.45371	0.456533
15	0.978316	0.832681	0.676298	0.557464	0.664903	0.481874	0.456594	0.459245
15.1	0.983348	0.835478	0.681466	0.557238	0.666535	0.485544	0.463424	0.46061
15.2	0.984042	0.83207	0.679916	0.563632	0.66772	0.485489	0.462388	0.462049
15.3	0.984658	0.830217	0.679486	0.559376	0.663201	0.48924	0.461891	0.462673
15.4	0.982006	0.835291	0.67924	0.565861	0.667717	0.490709	0.470691	0.463794
15.5	0.981368	0.830568	0.684719	0.562988	0.667275	0.491352	0.466194	0.468633
15.6	0.977071	0.836561	0.686885	0.568084	0.668126	0.494893	0.472621	0.46541
15.7	0.981048	0.835506	0.687178	0.571451	0.669562	0.496677	0.476665	0.468315
15.8	0.984287	0.839467	0.686225	0.569332	0.674304	0.499428	0.476347	0.471348
15.9	0.980625	0.837009	0.686653	0.573845	0.67305	0.498069	0.479653	0.470997
16	0.979788	0.837801	0.690205	0.574445	0.673026	0.500856	0.481573	0.476419
16.1	0.976582	0.83673	0.690732	0.573547	0.674865	0.505612	0.484721	0.474207
16.2	0.984232	0.837235	0.690453	0.576737	0.678544	0.504668	0.486201	0.479482
16.3	0.977678	0.838497	0.692127	0.576383	0.678502	0.508288	0.487856	0.478327
16.4	0.97722	0.840176	0.693737	0.579858	0.6775	0.509065	0.488383	0.480562
16.5	0.983235	0.841132	0.693527	0.578847	0.677961	0.512498	0.487533	0.481042
16.6	0.979772	0.842842	0.69585	0.585443	0.683841	0.515704	0.488422	0.481329
16.7	0.981943	0.844609	0.693301	0.584136	0.680643	0.511882	0.495476	0.488317
16.8	0.975593	0.838249	0.69712	0.5847	0.684822	0.511735	0.497926	0.485312
16.9	0.977482	0.845573	0.696076	0.586788	0.687153	0.517715	0.496589	0.488817
17	0.975405	0.842831	0.699711	0.584921	0.686766	0.521176	0.498558	0.489209
17.1	0.977571	0.841662	0.699214	0.588218	0.687219	0.517975	0.503521	0.490444
17.2	0.981296	0.841944	0.699308	0.587981	0.689335	0.52362	0.503138	0.49267
17.3	0.976979	0.842919	0.6983	0.589906	0.688763	0.523288	0.506305	0.494095
17.4	0.970641	0.843623	0.699681	0.587851	0.689732	0.524796	0.504521	0.491518
17.5	0.972163	0.841135	0.704779	0.590475	0.687835	0.524476	0.506355	0.49663
17.6	0.974648	0.844966	0.700531	0.594297	0.689437	0.524929	0.507518	0.494913
17.7	0.968553	0.844604	0.700736	0.593853	0.692561	0.529102	0.509951	0.496727
17.8	0.974938	0.84641	0.704252	0.593466	0.694303	0.530494	0.516345	0.497335
17.9	0.973668	0.83932	0.700777	0.594137	0.695024	0.530033	0.513898	0.501345
18	0.971458	0.843538	0.70381	0.59965	0.694916	0.529663	0.515083	0.499492
18.1	0.972334	0.841524	0.70276	0.595253	0.696819	0.532549	0.516911	0.501657
18.2	0.971806	0.844739	0.702012	0.600227	0.696811	0.53425	0.516309	0.501991
18.3	0.966893	0.841267	0.704315	0.59968	0.697264	0.53451	0.514704	0.50314
18.4	0.969114	0.844151	0.70671	0.600876	0.698786	0.537153	0.516218	0.506554
18.5	0.968882	0.841176	0.70626	0.60263	0.698015	0.534861	0.51932	0.502687
18.6	0.967517	0.83771	0.709284	0.605563	0.699918	0.542028	0.520529	0.505507
18.7	0.965951	0.845725	0.701029	0.601906	0.700241	0.54163	0.523692	0.510973
18.8	0.967084	0.84317	0.708356	0.605991	0.701777	0.540158	0.524443	0.505435
18.9	0.96539	0.846189	0.708734	0.606552	0.704426	0.543517	0.526177	0.508885
19	0.96847	0.842734	0.709613	0.606878	0.705318	0.543307	0.524424	0.510291
19.1	0.967012	0.841773	0.707259	0.604262	0.701352	0.544555	0.529155	0.507617
19.2	0.967893	0.84746	0.708	0.606961	0.702318	0.545928	0.528652	0.510556
19.3	0.965363	0.848868	0.708367	0.607356	0.707226	0.547273	0.528536	0.51616
19.4	0.962394	0.842593	0.710844	0.610148	0.703023	0.550107	0.52779	0.513868
19.5	0.959646	0.840986	0.714153	0.610987	0.705862	0.547784	0.533875	0.509965
19.6	0.962676	0.841952	0.711847	0.613352	0.70713	0.553832	0.531019	0.515356
19.7	0.956171	0.839	0.710046	0.608085	0.706064	0.549615	0.533444	0.515583
19.8	0.965437	0.845493	0.70988	0.613827	0.705931	0.553001	0.533044	0.517563
19.9	0.962565	0.841682	0.711328	0.615547	0.705362	0.551896	0.536582	0.517557
20	0.956528	0.842635	0.710162	0.612015	0.709367	0.553954	0.536234	0.516983
20.1	0.953282	0.842005	0.712598	0.614589	0.710543	0.55025	0.539156	0.518364
20.2	0.958091	0.840049	0.712275	0.616451	0.709287	0.553548	0.538396	0.518767
20.3	0.951539	0.844444	0.710198	0.614365	0.706718	0.554921	0.54226	0.519717
20.4	0.951829	0.841281	0.71125	0.613468	0.710991	0.558042	0.538123	0.51724
20.5	0.951542	0.84298	0.717523	0.618005	0.709052	0.557879	0.539589	0.521761
20.6	0.953105	0.843535	0.713537	0.621626	0.70397	0.557732	0.543185	0.522532
20.7	0.951785	0.840511	0.709958	0.619207	0.708516	0.5571	0.545025	0.522316
20.8	0.945676	0.840058	0.71151	0.620997	0.710115	0.560312	0.545754	0.521466
20.9	0.948181	0.83916	0.713637	0.617199	0.714264	0.560574	0.547428	0.520353
21	0.948474	0.845068	0.716943	0.620701	0.715252	0.562403	0.546359	0.523551
21.1	0.953031	0.839718	0.708179	0.620218	0.711126	0.563676	0.545356	0.524556
21.2	0.947778	0.836431	0.713866	0.617671	0.717628	0.563176	0.54664	0.526683
21.3	0.946797	0.838044	0.71539	0.625363	0.715374	0.563792	0.545221	0.526398
21.4	0.950048	0.841914	0.711543	0.622057	0.714733	0.563234	0.553181	0.52889
21.5	0.948057	0.840883	0.71467	0.620881	0.712311	0.565145	0.5479	0.531505
21.6	0.947971	0.836039	0.714584	0.621701	0.713319	0.563115	0.549543	0.525689
21.7	0.945345	0.838964	0.710124	0.621566	0.713731	0.565383	0.55336	0.527926
21.8	0.941213	0.838271	0.710822	0.62451	0.714617	0.564941	0.549844	0.528036
21.9	0.94195	0.839864	0.716393	0.6267	0.718064	0.566626	0.548383	0.52684
22	0.940191	0.836343	0.712416	0.621171	0.714741	0.567786	0.552126	0.526009
22.1	0.935672	0.835415	0.712908	0.626584	0.714358	0.568948	0.547535	0.527525
22.2	0.939633	0.833821	0.713073	0.62177	0.71655	0.568658	0.555492	0.530348
22.3	0.935402	0.835901	0.713001	0.623148	0.718081	0.567835	0.55093	0.528776
22.4	0.936128	0.833849	0.718429	0.628051	0.709822	0.568338	0.555531	0.529829
22.5	0.936937	0.833227	0.71309	0.626101	0.713358	0.5672	0.554233	0.529243
22.6	0.930809	0.836509	0.716874	0.627415	0.713808	0.566708	0.555343	0.532204
22.7	0.932841	0.838679	0.71272	0.627437	0.717683	0.570324	0.555744	0.531229
22.8	0.93388	0.830838	0.710588	0.626159	0.712725	0.571197	0.558818	0.531116
22.9	0.93813	0.829223	0.71082	0.629128	0.713576	0.569285	0.555172	0.529939
23	0.927527	0.832043	0.712841	0.63274	0.717978	0.571009	0.554799	0.532174
23.1	0.930682	0.831474	0.710952	0.628368	0.714377	0.572912	0.554451	0.533795
23.2	0.927867	0.829673	0.714137	0.624963	0.71333	0.573928	0.559812	0.533079
23.3	0.928019	0.829355	0.713275	0.630318	0.71372	0.571542	0.554755	0.533427
23.4	0.927179	0.828969	0.710922	0.62889	0.712167	0.570445	0.55974	0.533367
23.5	0.929519	0.826867	0.715719	0.632072	0.712189	0.574643	0.559859	0.536361
23.6	0.924708	0.82767	0.711455	0.629984	0.716139	0.573014	0.561157	0.536314
23.7	0.926459	0.830156	0.712419	0.629777	0.714007	0.57213	0.559986	0.53335
23.8	0.925401	0.829289	0.711819	0.630172	0.71441	0.576776	0.55684	0.535482
23.9	0.925757	0.827099	0.708894	0.628238	0.71449	0.57745	0.560196	0.534076
24	0.921178	0.828814	0.712239	0.631282	0.714678	0.574077	0.560414	0.533966
24.1	0.917281	0.825707	0.71415	0.634229	0.714421	0.577046	0.562135	0.535648
24.2	0.922285	0.823655	0.709179	0.633837	0.711935	0.572796	0.560351	0.536816
24.3	0.921868	0.822787	0.707594	0.633218	0.713101	0.577135	0.562419	0.535488
24.4	0.917888	0.828759	0.710414	0.632149	0.714062	0.57463	0.562115	0.538799
24.5	0.914204	0.824458	0.707268	0.634654	0.715653	0.575668	0.561066	0.536322
24.6	0.910249	0.822964	0.70985	0.632751	0.714493	0.574649	0.559784	0.53828
24.7	0.913527	0.821937	0.711554	0.63653	0.71415	0.575897	0.560337	0.534093
24.8	0.912334	0.820768	0.707994	0.632558	0.715714	0.577309	0.561958	0.537855
24.9	0.914447	0.824677	0.704227	0.626023	0.707572	0.57181	0.56417	0.533568
25	0.910393	0.823914	0.711507	0.630509	0.713576	0.576607	0.561701	0.539705
25.1	0.913077	0.819589	0.707657	0.62897	0.711778	0.573693	0.561585	0.539968
25.2	0.909188	0.82028	0.708505	0.635099	0.711435	0.579491	0.56377	0.539697
25.3	0.908269	0.820354	0.710947	0.629061	0.711886	0.574776	0.559439	0.539117
25.4	0.907697	0.816534	0.70982	0.629454	0.710806	0.577394	0.562433	0.539111
25.5	0.905496	0.816148	0.706367	0.633522	0.711844	0.576836	0.560417	0.538214
25.6	0.90554	0.816957	0.705274	0.638816	0.709262	0.576773	0.564402	0.53591
25.7	0.903938	0.820343	0.70819	0.632099	0.708135	0.581225	0.56475	0.536217
25.8	0.905344	0.816523	0.705688	0.632022	0.711852	0.574431	0.561737	0.53947
25.9	0.898511	0.816518	0.70191	0.636781	0.710955	0.576638	0.563463	0.536283
26	0.898933	0.817479	0.706801	0.630658	0.711438	0.57569	0.561549	0.536018
26.1	0.896163	0.815734	0.705039	0.630194	0.709947	0.5744	0.563728	0.539553
26.2	0.899646	0.813866	0.706229	0.630326	0.712957	0.580985	0.561972	0.540128
26.3	0.895509	0.814886	0.702208	0.635129	0.709869	0.578866	0.562845	0.540818
26.4	0.887767	0.810005	0.703975	0.635787	0.711411	0.580772	0.566079	0.53923
26.5	0.889308	0.814828	0.704161	0.631326	0.704528	0.57471	0.563524	0.537573
26.6	0.886629	0.813692	0.704724	0.635596	0.707414	0.577728	0.564728	0.53686
26.7	0.891067	0.809063	0.705597	0.636173	0.711504	0.578958	0.559862	0.538946
26.8	0.895337	0.813878	0.698885	0.632887	0.705216	0.575676	0.561955	0.537576
26.9	0.885988	0.806934	0.703233	0.631644	0.707392	0.577187	0.562566	0.535463
27	0.888631	0.805266	0.701407	0.632878	0.70829	0.576731	0.564869	0.537722
27.1	0.885952	0.803352	0.704213	0.63313	0.709665	0.575925	0.560892	0.54173
27.2	0.888698	0.809168	0.704335	0.631506	0.702769	0.579339	0.559779	0.536002
27.3	0.886646	0.809649	0.702015	0.632412	0.704475	0.579156	0.560831	0.539512
27.4	0.889225	0.804556	0.704161	0.63638	0.703884	0.574718	0.562433	0.543166
27.5	0.880669	0.806857	0.696007	0.632845	0.705481	0.575088	0.559218	0.537443
27.6	0.882936	0.802609	0.700382	0.631586	0.705826	0.575494	0.563574	0.533983
27.7	0.878871	0.802131	0.700504	0.635803	0.699852	0.574086	0.560585	0.537855
27.8	0.881224	0.806895	0.703813	0.629434	0.701777	0.57474	0.56404	0.537164
27.9	0.877291	0.799623	0.698446	0.63139	0.69796	0.576284	0.562256	0.538183
28	0.879222	0.801562	0.698927	0.6305	0.70181	0.57748	0.562776	0.537921
28.1	0.878666	0.797955	0.700708	0.633743	0.698358	0.574417	0.560323	0.540644
28.2	0.875449	0.803951	0.695894	0.630973	0.70139	0.577334	0.561461	0.537106
28.3	0.880075	0.800562	0.698385	0.630522	0.699703	0.581835	0.561433	0.538694
28.4	0.87939	0.793555	0.694309	0.632608	0.700426	0.575016	0.560828	0.538366
28.5	0.870011	0.796569	0.698562	0.632823	0.701156	0.575287	0.5648	0.536156
28.6	0.872204	0.792669	0.694104	0.630304	0.698222	0.578333	0.557981	0.533817
28.7	0.871107	0.791462	0.691655	0.631044	0.693486	0.57453	0.561676	0.534413
28.8	0.868845	0.796906	0.69427	0.63145	0.697305	0.574102	0.560406	0.537192
28.9	0.868005	0.79321	0.698148	0.632326	0.696969	0.575779	0.565449	0.538355
29	0.864211	0.795933	0.692983	0.631345	0.693834	0.577126	0.561679	0.535303
29.1	0.866459	0.792376	0.69176	0.630928	0.694985	0.578391	0.561408	0.536811
29.2	0.864059	0.791766	0.69063	0.629702	0.69548	0.573856	0.560765	0.538131
29.3	0.86434	0.793205	0.691815	0.631136	0.69258	0.577825	0.561	0.53435
29.4	0.861432	0.795784	0.692793	0.629412	0.69335	0.574022	0.559873	0.535203
29.5	0.861857	0.787142	0.689379	0.631837	0.692403	0.575248	0.562367	0.534118
29.6	0.860283	0.787374	0.694997	0.628633	0.690798	0.572854	0.558906	0.534157
29.7	0.861529	0.790376	0.69039	0.627252	0.690431	0.573931	0.560732	0.536573
29.8	0.85833	0.788548	0.689075	0.629318	0.691956	0.575563	0.560558	0.53646
29.9	0.854041	0.787485	0.689616	0.628136	0.689647	0.573133	0.555125	0.532317

## Sheet: primary data n=2
time	L	DL	DDL	DDDL	LDDD	DLDD	DDLD	DDDL
0	0.0283576	0.0146789	0.016265	0.0109649	0.00707899	0.00815204	0.00806088	0.00854011
0.1	0.0432996	0.0191664	0.0201535	0.0120562	0.00763896	0.00903236	0.00974598	0.00965222
0.2	0.0616586	0.0254406	0.0246384	0.0147935	0.0089985	0.00995955	0.0107669	0.0113139
0.3	0.0845885	0.0349027	0.0303423	0.0158795	0.0104883	0.0111264	0.0121916	0.0126213
0.4	0.106461	0.0436876	0.0371348	0.017997	0.0131891	0.0124312	0.0130433	0.0148898
0.5	0.129477	0.0541238	0.0433829	0.0207525	0.0149263	0.0140147	0.0154107	0.015791
0.6	0.153532	0.0673885	0.0526575	0.0227736	0.0182184	0.0156373	0.0159733	0.0181402
0.7	0.179871	0.0806765	0.0624451	0.0262558	0.0210182	0.016963	0.0176819	0.0200337
0.8	0.203707	0.0951392	0.0728969	0.0287874	0.0240498	0.0187992	0.0196534	0.0215313
0.9	0.227882	0.108839	0.0827705	0.0320612	0.0285816	0.0207838	0.0206796	0.0244144
1	0.25376	0.121856	0.0936651	0.0350876	0.0325743	0.0238545	0.0227762	0.0256672
1.1	0.274198	0.137965	0.104833	0.0395309	0.0375853	0.0256073	0.0248103	0.0289436
1.2	0.295054	0.15194	0.115933	0.0423073	0.0420885	0.0273549	0.0274539	0.0314023
1.3	0.318422	0.165645	0.127695	0.0467167	0.0463598	0.0288785	0.0283602	0.0349261
1.4	0.340396	0.18059	0.138139	0.0514803	0.0503369	0.0310715	0.0315039	0.0375489
1.5	0.35876	0.192873	0.150352	0.0549104	0.0566788	0.0349027	0.0336916	0.0403669
1.6	0.3754	0.208635	0.162184	0.057593	0.0626952	0.0363195	0.0359966	0.0422526
1.7	0.398952	0.221894	0.173326	0.061432	0.0699825	0.0390048	0.0395074	0.0459145
1.8	0.414085	0.233865	0.18272	0.0669066	0.074345	0.0426615	0.0414087	0.0476178
1.9	0.433759	0.250208	0.196477	0.0709227	0.0796686	0.0447112	0.0447607	0.0528841
2	0.449076	0.262207	0.206635	0.0757853	0.0856303	0.0475293	0.0458389	0.0552125
2.1	0.462489	0.272257	0.218295	0.0800983	0.090933	0.0512198	0.0493055	0.0596792
2.2	0.477571	0.285543	0.229281	0.084539	0.0978792	0.0544858	0.0511573	0.0623931
2.3	0.493399	0.299396	0.239519	0.0881618	0.104987	0.057382	0.0551656	0.0655315
2.4	0.506776	0.310054	0.251033	0.0923498	0.11068	0.0601766	0.0569679	0.0707587
2.5	0.517483	0.319115	0.261475	0.0986944	0.117494	0.0629035	0.0603642	0.0731626
2.6	0.530612	0.332127	0.268147	0.102976	0.121679	0.0656903	0.0646225	0.0769157
2.7	0.542431	0.342224	0.280183	0.10668	0.131915	0.0696361	0.066542	0.0800306
2.8	0.551406	0.352085	0.290489	0.11155	0.137621	0.0723813	0.0690996	0.0839999
2.9	0.563866	0.364052	0.298763	0.116035	0.142551	0.0769521	0.0732043	0.0888468
3	0.575844	0.374718	0.309158	0.120895	0.151998	0.0789055	0.0756238	0.0900136
3.1	0.588749	0.383016	0.31683	0.125372	0.158939	0.083742	0.0782335	0.0944491
3.2	0.595789	0.389852	0.328808	0.130086	0.165044	0.0862345	0.0812704	0.0986553
3.3	0.60747	0.401575	0.335351	0.134042	0.169458	0.0889458	0.0855183	0.102809
3.4	0.617914	0.411535	0.341998	0.137545	0.17923	0.0924931	0.0875315	0.10619
3.5	0.626723	0.417121	0.352671	0.141161	0.186229	0.095944	0.0920347	0.110912
3.6	0.635927	0.424641	0.362203	0.148242	0.191047	0.0981813	0.0943683	0.114543
3.7	0.644712	0.436777	0.366993	0.151563	0.197522	0.102622	0.0979391	0.118043
3.8	0.652799	0.442552	0.376885	0.156293	0.205549	0.106182	0.100395	0.122689
3.9	0.658195	0.451826	0.383323	0.161108	0.212539	0.109175	0.104424	0.126083
4	0.668564	0.457803	0.391644	0.16539	0.217284	0.114097	0.10737	0.128706
4.1	0.677484	0.469584	0.398588	0.171266	0.225817	0.117986	0.111693	0.133996
4.2	0.687332	0.473779	0.40451	0.174201	0.234146	0.121366	0.115368	0.139376
4.3	0.692186	0.479582	0.414342	0.181551	0.241113	0.125617	0.117504	0.141937
4.4	0.699937	0.488052	0.421151	0.184905	0.245316	0.126909	0.122708	0.146151
4.5	0.710657	0.494159	0.430784	0.190294	0.253476	0.130373	0.125062	0.152024
4.6	0.714767	0.500426	0.433319	0.195665	0.258933	0.134834	0.128636	0.153745
4.7	0.725336	0.503108	0.439924	0.199105	0.265736	0.139431	0.131172	0.159079
4.8	0.725266	0.512024	0.449537	0.204931	0.273557	0.142408	0.136246	0.161304
4.9	0.731772	0.518126	0.454954	0.2117	0.277714	0.146758	0.14015	0.167023
5	0.742864	0.528273	0.460898	0.213992	0.285631	0.14887	0.144205	0.169969
5.1	0.746474	0.531281	0.464895	0.218295	0.292528	0.153412	0.145796	0.175574
5.2	0.757397	0.535487	0.472162	0.222124	0.299029	0.155647	0.149919	0.179556
5.3	0.756202	0.545374	0.480877	0.226817	0.303529	0.160853	0.153865	0.18583
5.4	0.763745	0.545572	0.488047	0.229992	0.313885	0.167713	0.159241	0.188039
5.5	0.769753	0.552669	0.487008	0.236016	0.31563	0.17069	0.160811	0.191646
5.6	0.777679	0.557003	0.498777	0.24266	0.322935	0.173347	0.167755	0.195383
5.7	0.778809	0.563085	0.50066	0.246403	0.329324	0.176837	0.170148	0.199553
5.8	0.788534	0.570382	0.505903	0.249567	0.334739	0.179884	0.171083	0.204827
5.9	0.787714	0.572164	0.513433	0.254255	0.339844	0.183809	0.176425	0.208559
6	0.794134	0.575224	0.516641	0.260313	0.347707	0.186752	0.180061	0.214224
6.1	0.800236	0.581837	0.521613	0.264295	0.353783	0.19231	0.184497	0.218139
6.2	0.80644	0.584038	0.527377	0.267225	0.359328	0.197152	0.187778	0.220017
6.3	0.812995	0.58927	0.530732	0.272846	0.364269	0.201678	0.193547	0.22533
6.4	0.815717	0.593526	0.536808	0.275888	0.372176	0.203356	0.196357	0.228361
6.5	0.816235	0.599352	0.543934	0.281985	0.37603	0.207645	0.199832	0.232833
6.6	0.825656	0.602826	0.541462	0.287582	0.377645	0.209812	0.20341	0.236612
6.7	0.824788	0.607996	0.544223	0.288126	0.389634	0.217141	0.207762	0.24149
6.8	0.833196	0.609434	0.553945	0.296862	0.391743	0.221061	0.211336	0.245418
6.9	0.836878	0.615609	0.558834	0.299047	0.396926	0.224093	0.215003	0.249726
7	0.841168	0.618485	0.566124	0.302943	0.402554	0.228658	0.220129	0.255612
7.1	0.840694	0.623011	0.567288	0.30779	0.405125	0.231429	0.223298	0.25812
7.2	0.846049	0.627413	0.567546	0.313913	0.409094	0.234685	0.224819	0.264308
7.3	0.85206	0.627777	0.575901	0.316239	0.41721	0.239839	0.232044	0.267012
7.4	0.856503	0.63114	0.576881	0.322271	0.424068	0.240433	0.235248	0.270598
7.5	0.858168	0.637734	0.585145	0.326024	0.426375	0.246903	0.238032	0.275239
7.6	0.865997	0.643334	0.585322	0.328887	0.431514	0.252393	0.241728	0.277888
7.7	0.86446	0.644264	0.591585	0.332129	0.437147	0.252823	0.243204	0.283332
7.8	0.866671	0.649059	0.594643	0.336718	0.439494	0.258089	0.249098	0.286975
7.9	0.871073	0.651207	0.599886	0.341594	0.444328	0.262928	0.253614	0.290913
8	0.878555	0.653851	0.601115	0.345751	0.449162	0.266181	0.259071	0.29587
8.1	0.876032	0.656901	0.605431	0.350673	0.452803	0.269926	0.263842	0.299513
8.2	0.880829	0.661602	0.609007	0.352106	0.4561	0.274117	0.266165	0.303917
8.3	0.884835	0.662568	0.611929	0.356656	0.461291	0.27643	0.268132	0.306517
8.4	0.888007	0.668811	0.614187	0.362979	0.464343	0.279433	0.270559	0.312223
8.5	0.887684	0.669457	0.61837	0.364651	0.470407	0.284819	0.276195	0.313369
8.6	0.894094	0.674645	0.625551	0.367048	0.472769	0.286496	0.280928	0.318458
8.7	0.89299	0.673882	0.626355	0.376004	0.477209	0.291291	0.284517	0.323279
8.8	0.891508	0.677666	0.628066	0.377403	0.481788	0.295213	0.286262	0.325167
8.9	0.898771	0.679732	0.632952	0.378885	0.483447	0.300144	0.290947	0.328551
9	0.900701	0.681344	0.633765	0.383537	0.489021	0.299758	0.297568	0.331999
9.1	0.9013	0.685368	0.639341	0.38456	0.49387	0.304493	0.29706	0.333997
9.2	0.905314	0.691619	0.64175	0.388436	0.492803	0.309754	0.300688	0.338846
9.3	0.911307	0.690467	0.641412	0.392209	0.496722	0.313171	0.305589	0.346001
9.4	0.907835	0.694155	0.648277	0.396955	0.497756	0.315505	0.30821	0.345933
9.5	0.915583	0.696572	0.647436	0.400148	0.504783	0.315276	0.314195	0.350876
9.6	0.911716	0.702365	0.656768	0.401078	0.510128	0.3215	0.316523	0.352147
9.7	0.91987	0.701068	0.656536	0.406334	0.514245	0.326214	0.318305	0.355924
9.8	0.919274	0.703896	0.65862	0.411879	0.515206	0.330845	0.321409	0.359979
9.9	0.920941	0.702594	0.660281	0.413118	0.514823	0.334658	0.325634	0.363169
10	0.922066	0.707542	0.663347	0.41473	0.518113	0.333734	0.329777	0.3666
10.1	0.920386	0.715314	0.665777	0.417431	0.522921	0.337278	0.332379	0.369347
10.2	0.923233	0.711415	0.667076	0.420372	0.526997	0.340057	0.335635	0.374621
10.3	0.928866	0.713676	0.66954	0.426341	0.529528	0.342229	0.338528	0.37676
10.4	0.927171	0.717153	0.670124	0.428386	0.532583	0.346022	0.342474	0.37876
10.5	0.92548	0.719174	0.674043	0.429506	0.537506	0.351145	0.34499	0.382167
10.6	0.930583	0.716905	0.679818	0.433678	0.540303	0.354155	0.349725	0.386011
10.7	0.929082	0.720742	0.678786	0.436077	0.540941	0.3542	0.35216	0.387516
10.8	0.933466	0.722469	0.682675	0.438793	0.540819	0.361083	0.355781	0.392319
10.9	0.930241	0.728063	0.686996	0.44096	0.544423	0.363477	0.359445	0.395608
11	0.934903	0.727245	0.685183	0.443289	0.550242	0.364201	0.362052	0.396634
11.1	0.935742	0.731066	0.686735	0.445659	0.551406	0.368009	0.363451	0.399333
11.2	0.936779	0.728532	0.687753	0.44568	0.552445	0.372186	0.368475	0.401726
11.3	0.940506	0.732566	0.690683	0.449628	0.55157	0.376025	0.370678	0.40474
11.4	0.938584	0.737197	0.691983	0.453691	0.558693	0.375137	0.375384	0.403997
11.5	0.945358	0.735382	0.697179	0.453149	0.558141	0.376431	0.380708	0.408805
11.6	0.940115	0.740137	0.697067	0.45479	0.563535	0.380528	0.380885	0.41047
11.7	0.942462	0.738838	0.699698	0.457652	0.565746	0.386222	0.381698	0.417452
11.8	0.946954	0.742661	0.704453	0.463617	0.569533	0.388842	0.385808	0.417236
11.9	0.947707	0.744544	0.703774	0.464921	0.569372	0.393842	0.389214	0.416637
12	0.946436	0.745078	0.703492	0.466086	0.571518	0.392423	0.391444	0.420752
12.1	0.942579	0.746417	0.709238	0.469748	0.573138	0.393105	0.392236	0.422849
12.2	0.943863	0.742169	0.711933	0.469511	0.574224	0.398812	0.395548	0.425784
12.3	0.947298	0.750845	0.70816	0.471136	0.57824	0.399999	0.396648	0.43005
12.4	0.948595	0.750868	0.71559	0.475337	0.582022	0.399895	0.40144	0.430277
12.5	0.949476	0.746425	0.711811	0.478207	0.580693	0.406435	0.40368	0.43253
12.6	0.944965	0.752847	0.718322	0.479428	0.585968	0.409574	0.405607	0.435262
12.7	0.949569	0.749904	0.718015	0.482692	0.586843	0.408967	0.408412	0.440739
12.8	0.950804	0.757202	0.719773	0.486341	0.590716	0.412324	0.412647	0.43996
12.9	0.947512	0.754249	0.722568	0.486122	0.591031	0.414707	0.417562	0.436986
13	0.946689	0.757077	0.722711	0.486862	0.590382	0.41591	0.415569	0.443937
13.1	0.950077	0.760601	0.726107	0.487067	0.594099	0.417913	0.416936	0.441327
13.2	0.948991	0.759184	0.725034	0.492443	0.592677	0.419465	0.422617	0.447422
13.3	0.954388	0.759827	0.731884	0.4968	0.592823	0.424122	0.422989	0.450659
13.4	0.949947	0.75516	0.728782	0.495553	0.598328	0.426526	0.425701	0.448667
13.5	0.948488	0.762322	0.732168	0.502166	0.599592	0.429667	0.427649	0.451443
13.6	0.949298	0.765143	0.729889	0.500402	0.600386	0.430248	0.433311	0.455814
13.7	0.953356	0.765039	0.732983	0.498428	0.604493	0.434876	0.430623	0.458215
13.8	0.954815	0.762398	0.731821	0.50258	0.604483	0.431852	0.434657	0.45746
13.9	0.947918	0.764974	0.735538	0.503504	0.604887	0.432641	0.437595	0.460431
14	0.951744	0.766307	0.734978	0.505958	0.607525	0.437231	0.438236	0.462241
14.1	0.955492	0.765904	0.734645	0.503744	0.60679	0.437918	0.439661	0.463773
14.2	0.954354	0.771282	0.737153	0.507687	0.613455	0.439278	0.443437	0.467956
14.3	0.958737	0.772394	0.735314	0.513201	0.612979	0.443836	0.445086	0.469123
14.4	0.955812	0.772363	0.742846	0.513073	0.613223	0.444177	0.446437	0.472467
14.5	0.95296	0.769204	0.740075	0.513289	0.614622	0.447318	0.448641	0.473365
14.6	0.954672	0.766456	0.747894	0.515063	0.61805	0.44656	0.447586	0.471232
14.7	0.951544	0.770797	0.743737	0.517634	0.618258	0.451628	0.452524	0.473613
14.8	0.954705	0.772928	0.743276	0.51961	0.617182	0.449685	0.45554	0.476493
14.9	0.948884	0.775118	0.743002	0.519342	0.619295	0.454811	0.45615	0.474084
15	0.954979	0.776543	0.746182	0.518597	0.619651	0.456647	0.459366	0.477858
15.1	0.956237	0.7733	0.750946	0.520202	0.623998	0.456262	0.461218	0.478223
15.2	0.952973	0.773339	0.743794	0.521092	0.626538	0.457973	0.459124	0.48115
15.3	0.951679	0.774743	0.747943	0.523517	0.626605	0.460088	0.465297	0.482137
15.4	0.950968	0.777913	0.746998	0.525275	0.625735	0.462301	0.46637	0.48532
15.5	0.952346	0.777777	0.751657	0.529471	0.625566	0.463843	0.464143	0.486713
15.6	0.952161	0.78053	0.752071	0.525903	0.629621	0.464018	0.4677	0.482749
15.7	0.95109	0.776975	0.75447	0.527572	0.629832	0.467013	0.469378	0.48801
15.8	0.950538	0.781838	0.758241	0.531461	0.629153	0.468867	0.469537	0.48987
15.9	0.953059	0.781197	0.751912	0.53101	0.633361	0.467841	0.475402	0.490151
16	0.947595	0.779411	0.75372	0.529721	0.633598	0.467919	0.472792	0.490552
16.1	0.944037	0.781768	0.760882	0.531669	0.634239	0.471977	0.47686	0.491966
16.2	0.951455	0.779166	0.755085	0.538144	0.632679	0.476355	0.47767	0.493209
16.3	0.949345	0.782976	0.753946	0.537912	0.636086	0.475209	0.481041	0.493402
16.4	0.948895	0.780283	0.758499	0.539782	0.635432	0.476535	0.478004	0.495868
16.5	0.947697	0.781325	0.75766	0.538722	0.639901	0.47809	0.480837	0.495087
16.6	0.948749	0.782072	0.758387	0.533123	0.637922	0.475819	0.479939	0.497556
16.7	0.948577	0.777176	0.761075	0.537542	0.64193	0.479496	0.486362	0.499764
16.8	0.949262	0.781385	0.761585	0.54134	0.641123	0.481075	0.48558	0.500668
16.9	0.943168	0.784539	0.757134	0.540491	0.644972	0.483377	0.485473	0.502749
17	0.944827	0.782145	0.762971	0.541407	0.642303	0.484773	0.487888	0.502931
17.1	0.947939	0.781288	0.758736	0.543957	0.63931	0.48595	0.489846	0.504002
17.2	0.944748	0.784252	0.761182	0.548153	0.64711	0.487346	0.491448	0.503372
17.3	0.948212	0.781546	0.764708	0.545447	0.64329	0.489477	0.493766	0.503283
17.4	0.948947	0.78538	0.759254	0.546395	0.646751	0.491852	0.491727	0.50533
17.5	0.946269	0.782859	0.765161	0.543522	0.645751	0.489339	0.493527	0.50869
17.6	0.9373	0.77953	0.764995	0.550651	0.644048	0.492102	0.495298	0.509383
17.7	0.942509	0.785099	0.762377	0.552312	0.647582	0.490966	0.497639	0.509831
17.8	0.94223	0.783393	0.761971	0.549846	0.651684	0.495399	0.497303	0.508677
17.9	0.943668	0.782713	0.763758	0.552922	0.648671	0.493698	0.496485	0.512357
18	0.944756	0.784198	0.767604	0.551656	0.651903	0.493438	0.500275	0.510003
18.1	0.942436	0.786021	0.763695	0.552216	0.649155	0.493243	0.498993	0.513005
18.2	0.938852	0.784901	0.763713	0.552779	0.649728	0.496378	0.501038	0.514037
18.3	0.941428	0.783028	0.76463	0.556037	0.654312	0.497274	0.504056	0.510604
18.4	0.938818	0.784388	0.766323	0.555242	0.652827	0.502429	0.504955	0.514162
18.5	0.937261	0.78382	0.764005	0.554701	0.652796	0.500921	0.505497	0.517141
18.6	0.938636	0.785234	0.767529	0.553951	0.651361	0.501916	0.507283	0.516446
18.7	0.935575	0.785224	0.766581	0.555529	0.657635	0.501936	0.506453	0.513438
18.8	0.937781	0.781861	0.766987	0.554982	0.656213	0.506528	0.509752	0.516334
18.9	0.937167	0.786713	0.764224	0.556412	0.659583	0.502765	0.508237	0.51766
19	0.937805	0.784455	0.771136	0.559699	0.652452	0.501897	0.507252	0.515792
19.1	0.937688	0.78245	0.76973	0.559279	0.66137	0.50539	0.509669	0.517149
19.2	0.935685	0.782351	0.766682	0.559545	0.65488	0.506718	0.509789	0.51867
19.3	0.934547	0.786208	0.770576	0.558644	0.657383	0.507718	0.510349	0.523272
19.4	0.933221	0.782132	0.766326	0.560191	0.656257	0.510661	0.514339	0.525616
19.5	0.931906	0.784737	0.769586	0.560233	0.660873	0.507807	0.515191	0.521486
19.6	0.933552	0.780132	0.771727	0.566788	0.660758	0.507315	0.513276	0.524635
19.7	0.924256	0.782208	0.767927	0.565666	0.659328	0.510526	0.517194	0.523733
19.8	0.930903	0.785297	0.77141	0.564116	0.660531	0.512193	0.516897	0.524655
19.9	0.92971	0.781369	0.767857	0.564468	0.660143	0.510534	0.514454	0.524968
20	0.926048	0.783455	0.770891	0.565301	0.660505	0.512573	0.517962	0.52545
20.1	0.923337	0.785031	0.769292	0.566022	0.659755	0.51218	0.51761	0.524614
20.2	0.927798	0.781421	0.765758	0.561108	0.660586	0.512797	0.517087	0.527002
20.3	0.926142	0.777827	0.769024	0.565608	0.657932	0.515433	0.517949	0.52464
20.4	0.931315	0.781351	0.769115	0.567624	0.660232	0.515714	0.521186	0.526406
20.5	0.925793	0.778973	0.773642	0.566718	0.66038	0.513925	0.5206	0.530489
20.6	0.920477	0.781254	0.769941	0.569195	0.657325	0.515558	0.523337	0.529466
20.7	0.921537	0.784362	0.768425	0.571817	0.663118	0.516008	0.523228	0.526476
20.8	0.925447	0.780088	0.769167	0.5651	0.662042	0.519267	0.523525	0.531099
20.9	0.921678	0.780439	0.769607	0.56826	0.662578	0.51909	0.523486	0.533623
21	0.921944	0.781002	0.770347	0.568926	0.662758	0.516957	0.527739	0.527734
21.1	0.92123	0.779871	0.77166	0.570445	0.665764	0.517886	0.520657	0.528221
21.2	0.914406	0.780807	0.767422	0.570104	0.664613	0.523176	0.524905	0.529333
21.3	0.91624	0.780622	0.769206	0.568041	0.665962	0.519243	0.52341	0.530945
21.4	0.913765	0.77772	0.769274	0.574151	0.662459	0.520545	0.527674	0.530693
21.5	0.914331	0.779476	0.766461	0.571599	0.665053	0.520306	0.530393	0.534847
21.6	0.914208	0.780093	0.766503	0.574643	0.663175	0.52021	0.52639	0.531167
21.7	0.91208	0.778598	0.768727	0.574065	0.666498	0.523749	0.52807	0.531052
21.8	0.913177	0.775751	0.77249	0.573216	0.66804	0.523825	0.527953	0.536896
21.9	0.91368	0.777905	0.767172	0.572789	0.666501	0.52123	0.529659	0.532083
22	0.912159	0.774366	0.7688	0.574315	0.665126	0.52533	0.526828	0.533714
22.1	0.908939	0.777137	0.766326	0.573896	0.664089	0.523736	0.529807	0.533964
22.2	0.908275	0.773155	0.766227	0.569721	0.665842	0.526301	0.529474	0.535503
22.3	0.905085	0.772084	0.764833	0.572474	0.667845	0.526437	0.527637	0.53629
22.4	0.906627	0.774149	0.76886	0.575659	0.66194	0.528036	0.53174	0.533182
22.5	0.906637	0.7771	0.768407	0.575367	0.665881	0.524864	0.532237	0.535193
22.6	0.907009	0.775571	0.768133	0.575594	0.665753	0.525322	0.528604	0.537714
22.7	0.90678	0.773485	0.769993	0.575748	0.669405	0.527671	0.531172	0.533732
22.8	0.904178	0.773967	0.768693	0.575458	0.664933	0.526223	0.531185	0.534469
22.9	0.904861	0.775389	0.769347	0.573823	0.66729	0.525757	0.533604	0.533964
23	0.901931	0.769889	0.769128	0.574995	0.663881	0.527302	0.533042	0.537269
23.1	0.898467	0.773504	0.764601	0.573377	0.667241	0.52852	0.536672	0.541032
23.2	0.896519	0.771993	0.765951	0.57443	0.667845	0.527515	0.533005	0.536251
23.3	0.89861	0.769073	0.762963	0.573557	0.665998	0.528375	0.531372	0.538915
23.4	0.897704	0.770659	0.764669	0.576315	0.667543	0.529145	0.530633	0.538105
23.5	0.896628	0.771287	0.764937	0.578149	0.661826	0.533518	0.534644	0.536553
23.6	0.895834	0.771709	0.766227	0.57842	0.66673	0.530505	0.534805	0.539082
23.7	0.890914	0.764255	0.768584	0.578378	0.666167	0.532742	0.533089	0.539108
23.8	0.893977	0.771144	0.76387	0.576972	0.669038	0.52902	0.536404	0.538467
23.9	0.889197	0.768881	0.759741	0.57669	0.663777	0.529791	0.534787	0.536727
24	0.889135	0.766938	0.765471	0.575834	0.662573	0.532141	0.534857	0.538571
24.1	0.895446	0.766099	0.760713	0.577646	0.66817	0.531776	0.536409	0.536339
24.2	0.890544	0.768722	0.763825	0.578915	0.667543	0.531958	0.534058	0.541256
24.3	0.888148	0.768894	0.762088	0.575852	0.664225	0.530961	0.535084	0.541006
24.4	0.887736	0.767083	0.769748	0.57667	0.665759	0.532354	0.537897	0.538595
24.5	0.888395	0.763552	0.764349	0.579295	0.666368	0.53523	0.537506	0.54117
24.6	0.891953	0.768628	0.764	0.578532	0.664396	0.532742	0.536701	0.539342
24.7	0.881491	0.765271	0.764304	0.577459	0.667342	0.53064	0.535951	0.536782
24.8	0.885077	0.761356	0.762474	0.578743	0.665727	0.532893	0.534568	0.535777
24.9	0.888351	0.762804	0.76362	0.579636	0.663628	0.531016	0.534956	0.539587
25	0.881478	0.762942	0.75896	0.578373	0.663008	0.529742	0.534644	0.540386
25.1	0.881345	0.763708	0.760744	0.574531	0.661206	0.534425	0.538938	0.539813
25.2	0.878259	0.762562	0.759043	0.575761	0.662472	0.532227	0.536896	0.540574
25.3	0.877701	0.759603	0.764151	0.578459	0.665993	0.531831	0.538829	0.53804
25.4	0.880009	0.760525	0.760635	0.574555	0.665001	0.531466	0.534591	0.539254
25.5	0.877876	0.764258	0.763276	0.578	0.664605	0.532477	0.538779	0.536782
25.6	0.878295	0.759471	0.76065	0.576169	0.667688	0.533852	0.538842	0.541402
25.7	0.874263	0.758395	0.755608	0.582256	0.662818	0.5328	0.538303	0.539108
25.8	0.874362	0.75683	0.756783	0.578253	0.667071	0.53294	0.535472	0.539566
25.9	0.872831	0.757483	0.760525	0.577935	0.664329	0.53511	0.536055	0.540829
26	0.871437	0.754814	0.758614	0.579089	0.667808	0.536331	0.54065	0.542434
26.1	0.872417	0.756431	0.757976	0.577782	0.662183	0.533292	0.537594	0.540709
26.2	0.868289	0.753376	0.754934	0.578722	0.663641	0.535373	0.540053	0.542973
26.3	0.872372	0.758559	0.757457	0.580391	0.663558	0.534081	0.537826	0.537876
26.4	0.865541	0.755975	0.754181	0.582488	0.665496	0.536844	0.536165	0.537042
26.5	0.863603	0.755772	0.75665	0.574406	0.666988	0.531187	0.540074	0.536079
26.6	0.865327	0.752045	0.755486	0.577797	0.666931	0.535566	0.540866	0.539642
26.7	0.864366	0.751847	0.752287	0.581048	0.661029	0.537251	0.539188	0.543415
26.8	0.865189	0.751501	0.752876	0.57856	0.663982	0.535829	0.536644	0.540621
26.9	0.862374	0.749191	0.751014	0.578201	0.658654	0.532487	0.540191	0.539204
27	0.86184	0.749342	0.755189	0.576013	0.661302	0.533156	0.535696	0.541113
27.1	0.86347	0.746086	0.750178	0.580462	0.663115	0.535974	0.540407	0.541285
27.2	0.860124	0.746097	0.753603	0.579508	0.6623	0.536993	0.540397	0.542467
27.3	0.860556	0.74717	0.749592	0.57681	0.661162	0.534748	0.538759	0.539649
27.4	0.856417	0.748849	0.749748	0.576826	0.659966	0.532287	0.537626	0.535777
27.5	0.857878	0.747138	0.749451	0.578894	0.659461	0.535006	0.534068	0.541048
27.6	0.854409	0.745107	0.750975	0.579305	0.657898	0.536644	0.535352	0.539313
27.7	0.854511	0.74537	0.751305	0.579493	0.660693	0.537769	0.540405	0.537998
27.8	0.851195	0.745372	0.750118	0.578748	0.656721	0.539334	0.539134	0.538199
27.9	0.850664	0.744521	0.752918	0.575862	0.659068	0.53207	0.541587	0.538811
28	0.852248	0.739437	0.750139	0.573148	0.659102	0.536493	0.538337	0.537779
28.1	0.851497	0.745893	0.749326	0.575758	0.657099	0.534638	0.536615	0.539816
28.2	0.848244	0.74412	0.747714	0.577029	0.658305	0.532852	0.53543	0.536709
28.3	0.847203	0.743258	0.747365	0.575565	0.664753	0.535021	0.532586	0.537571
28.4	0.848849	0.745458	0.747211	0.577136	0.655752	0.534688	0.538941	0.537886
28.5	0.843775	0.738213	0.74474	0.57924	0.657117	0.533742	0.538779	0.535141
28.6	0.843955	0.739929	0.744177	0.575068	0.656208	0.533823	0.540191	0.538121
28.7	0.845885	0.735983	0.74594	0.576771	0.657338	0.534907	0.540113	0.539589
28.8	0.839405	0.742791	0.744213	0.575214	0.656205	0.535857	0.533696	0.53903
28.9	0.842301	0.73628	0.745432	0.574206	0.655333	0.533602	0.538149	0.537709
29	0.839993	0.739788	0.744953	0.578331	0.654452	0.536425	0.537175	0.538115
29.1	0.836605	0.737788	0.743331	0.574591	0.654611	0.533781	0.533729	0.537316
29.2	0.84084	0.73733	0.74339	0.575805	0.656278	0.536266	0.535547	0.536152
29.3	0.833855	0.736775	0.743695	0.575779	0.654127	0.531958	0.536279	0.538173
29.4	0.834672	0.733311	0.743487	0.576414	0.657093	0.531307	0.538053	0.536657
29.5	0.834235	0.733215	0.738179	0.575521	0.655328	0.536334	0.537397	0.536092
29.6	0.836436	0.736254	0.740122	0.573127	0.656896	0.532271	0.534214	0.534631
29.7	0.834704	0.733488	0.742088	0.573713	0.652155	0.531831	0.534334	0.533513
29.8	0.829487	0.731147	0.739148	0.574516	0.650871	0.530906	0.536787	0.531617
29.9	0.825791	0.726901	0.740664	0.571601	0.655124	0.536675	0.536587	0.538433

## Sheet: primary data n=3
time	L	DL	DDL	DDDL	LDDD	DLDD	DDLD	DDDL
0	0.026212	0.0100843	0.00719709	0.00952144	0.00628135	0.00688904	0.00687504	0.00697585
0.1	0.0388335	0.0125459	0.00825845	0.010692	0.00703466	0.00776557	0.00838726	0.00906497
0.2	0.0553587	0.0167661	0.0099499	0.0118262	0.00839847	0.00910137	0.00913498	0.00942062
0.3	0.0732086	0.0210088	0.0118486	0.0127531	0.00957744	0.0101319	0.0102383	0.0109356
0.4	0.0938085	0.0268841	0.0126915	0.0144642	0.010902	0.0107256	0.0113921	0.0131032
0.5	0.116021	0.0342548	0.0155087	0.0148618	0.013134	0.0123079	0.0123779	0.0138397
0.6	0.139637	0.0416059	0.0184548	0.0168389	0.0153295	0.0137697	0.0139629	0.0147862
0.7	0.163119	0.050346	0.0206699	0.0181775	0.017511	0.014327	0.0151951	0.0167437
0.8	0.186357	0.0600579	0.0247025	0.0192921	0.0212496	0.0159008	0.0168193	0.018396
0.9	0.207181	0.0691676	0.0284747	0.0207595	0.0240024	0.0172954	0.0176623	0.0199978
1	0.230844	0.0788963	0.0323337	0.0220505	0.0288724	0.0194265	0.0194293	0.022493
1.1	0.251764	0.0883001	0.0357082	0.0245765	0.0312331	0.0206587	0.0201042	0.0233835
1.2	0.276357	0.100678	0.0402729	0.0263912	0.035837	0.0218265	0.022661	0.026324
1.3	0.295447	0.110726	0.0458989	0.0287351	0.040959	0.0232407	0.0237252	0.0285979
1.4	0.315529	0.123611	0.0501752	0.0315188	0.0448488	0.0255651	0.0253942	0.0299617
1.5	0.33623	0.134538	0.0554484	0.0328742	0.0497691	0.027573	0.0274749	0.0329694
1.6	0.354808	0.142889	0.0607076	0.0353497	0.0542918	0.0309111	0.0296117	0.0339131
1.7	0.373904	0.156252	0.066636	0.0373828	0.0604723	0.0313395	0.0317904	0.0372848
1.8	0.394224	0.169935	0.0725869	0.03992	0.0650622	0.0341175	0.0349213	0.0393739
1.9	0.411825	0.178692	0.0780982	0.0428577	0.0711111	0.0362907	0.0350977	0.041379
2	0.42621	0.189471	0.0815595	0.0441347	0.078059	0.0382314	0.0377441	0.0452688
2.1	0.444144	0.202031	0.0893671	0.0478116	0.0834162	0.0406173	0.0400572	0.0470779
2.2	0.459661	0.210329	0.0959229	0.0498699	0.0895939	0.0426896	0.0426364	0.050304
2.3	0.4713	0.222233	0.0990901	0.0538185	0.0944302	0.0458261	0.0443559	0.0537457
2.4	0.4875	0.232491	0.107721	0.056801	0.10352	0.0487694	0.0475092	0.0554708
2.5	0.50358	0.242928	0.113762	0.0582208	0.11104	0.050276	0.05029	0.0588117
2.6	0.516994	0.253956	0.120693	0.0618109	0.117195	0.0537821	0.0510769	0.0607188
2.7	0.527037	0.264175	0.124358	0.0648802	0.122328	0.0549835	0.0548547	0.0644349
2.8	0.540145	0.275528	0.131519	0.0682967	0.13057	0.059607	0.0575011	0.06644
2.9	0.551294	0.284573	0.137649	0.0702514	0.138383	0.062273	0.0592681	0.0701058
3	0.565755	0.29305	0.144278	0.0737211	0.144645	0.0651378	0.0630599	0.0734663
3.1	0.578985	0.304801	0.150724	0.076838	0.152578	0.0688932	0.0650678	0.0770872
3.2	0.583496	0.31519	0.156311	0.0805597	0.159249	0.0714136	0.0684563	0.0794144
3.3	0.599988	0.323953	0.163881	0.0835982	0.167297	0.0737379	0.0719232	0.0826685
3.4	0.606468	0.331836	0.170593	0.0864546	0.175519	0.0789103	0.0756114	0.0884261
3.5	0.618294	0.339159	0.174892	0.0905853	0.181837	0.0794116	0.0777285	0.0908289
3.6	0.627936	0.349504	0.182251	0.0929964	0.189995	0.0841555	0.080725	0.0919603
3.7	0.641414	0.357499	0.189073	0.096651	0.196046	0.0869643	0.0826069	0.0969534
3.8	0.643811	0.363274	0.193464	0.10051	0.204663	0.0909185	0.0857209	0.100619
3.9	0.655355	0.375293	0.199866	0.102952	0.213426	0.0935593	0.087712	0.105702
4	0.666304	0.380597	0.204655	0.107063	0.21952	0.0971859	0.0907981	0.10643
4.1	0.670659	0.390373	0.213157	0.109995	0.227534	0.100412	0.0956372	0.111317
4.2	0.684992	0.400032	0.21792	0.114086	0.236146	0.105422	0.0986057	0.11554
4.3	0.689181	0.404286	0.224249	0.118491	0.240685	0.106957	0.100874	0.118587
4.4	0.6994	0.411839	0.229296	0.121547	0.250685	0.111138	0.107007	0.123703
4.5	0.706143	0.42155	0.236762	0.126162	0.256911	0.115377	0.110118	0.12743
4.6	0.713693	0.428017	0.240993	0.129069	0.263332	0.118755	0.112412	0.131732
4.7	0.719826	0.43728	0.248857	0.131782	0.272607	0.120105	0.116702	0.133149
4.8	0.729185	0.441215	0.254214	0.137044	0.279843	0.125988	0.117987	0.138332
4.9	0.733103	0.449067	0.260117	0.140825	0.28804	0.130172	0.12246	0.142093
5	0.746492	0.453548	0.264945	0.144591	0.294663	0.133701	0.125439	0.147033
5.1	0.750396	0.459675	0.271271	0.149604	0.299323	0.137358	0.129032	0.149192
5.2	0.755288	0.466965	0.277533	0.150926	0.30971	0.140559	0.133048	0.15474
5.3	0.76106	0.473227	0.284321	0.155687	0.317044	0.143314	0.137294	0.1584
5.4	0.767873	0.478393	0.284618	0.161086	0.32185	0.148932	0.140626	0.162296
5.5	0.775625	0.487573	0.29466	0.16343	0.330814	0.153726	0.144132	0.167432
5.6	0.7788	0.492664	0.298522	0.168359	0.340243	0.159848	0.149543	0.170224
5.7	0.782945	0.493538	0.305252	0.169843	0.342475	0.161526	0.152998	0.175189
5.8	0.79092	0.500155	0.311345	0.174581	0.349003	0.165345	0.158243	0.179653
5.9	0.798392	0.50675	0.315725	0.179373	0.357992	0.170521	0.161316	0.184024
6	0.804256	0.511923	0.319556	0.18184	0.365301	0.174598	0.162027	0.187564
6.1	0.810535	0.516056	0.327733	0.187351	0.372949	0.177561	0.167698	0.192081
6.2	0.814452	0.51903	0.331007	0.192434	0.377304	0.183251	0.174192	0.196262
6.3	0.817919	0.53089	0.335216	0.196478	0.386985	0.185699	0.177354	0.200922
6.4	0.824164	0.535186	0.341408	0.201541	0.391807	0.190969	0.179857	0.204974
6.5	0.831403	0.536018	0.343273	0.203291	0.397052	0.194324	0.18851	0.207702
6.6	0.829662	0.542148	0.351215	0.20743	0.404779	0.199931	0.190275	0.214056
6.7	0.836063	0.545071	0.356096	0.212149	0.409181	0.204168	0.194002	0.219189
6.8	0.845795	0.550857	0.357314	0.214557	0.416062	0.207433	0.195769	0.224955
6.9	0.844593	0.556996	0.364637	0.221435	0.422575	0.212076	0.20046	0.229394
7	0.852978	0.560451	0.367581	0.227327	0.427011	0.217682	0.207178	0.231447
7.1	0.856996	0.563257	0.375136	0.228489	0.434416	0.221718	0.210751	0.235297
7.2	0.858436	0.567744	0.378382	0.236641	0.435457	0.226857	0.214574	0.241917
7.3	0.857209	0.572552	0.382879	0.238691	0.444998	0.231816	0.219209	0.245673
7.4	0.866347	0.576949	0.387979	0.242813	0.448577	0.236658	0.222449	0.250277
7.5	0.871307	0.578704	0.389382	0.245451	0.455822	0.237476	0.228422	0.25371
7.6	0.875356	0.581172	0.394271	0.251332	0.461935	0.243418	0.233309	0.258891
7.7	0.879996	0.584991	0.395697	0.25203	0.466704	0.24611	0.236843	0.264377
7.8	0.879932	0.595384	0.404837	0.259633	0.471647	0.252007	0.239349	0.267998
7.9	0.881587	0.600803	0.407226	0.263629	0.474352	0.252671	0.246045	0.27308
8	0.888132	0.600833	0.409769	0.267494	0.480253	0.257857	0.247958	0.277611
8.1	0.893282	0.608022	0.41588	0.271078	0.485674	0.2618	0.253169	0.282364
8.2	0.892814	0.606633	0.421256	0.277869	0.488752	0.269697	0.258597	0.284215
8.3	0.898098	0.613839	0.423796	0.278835	0.493731	0.272453	0.2635	0.291286
8.4	0.901081	0.614449	0.426538	0.281476	0.497321	0.276589	0.265245	0.292417
8.5	0.901548	0.619523	0.430419	0.28648	0.502009	0.280756	0.273226	0.296248
8.6	0.90007	0.624769	0.433321	0.290222	0.510618	0.286562	0.276099	0.300978
8.7	0.914769	0.629616	0.438302	0.29447	0.510982	0.290177	0.279653	0.306229
8.8	0.914957	0.628703	0.443937	0.299318	0.512995	0.295512	0.283285	0.309155
8.9	0.912638	0.633161	0.445018	0.302098	0.520489	0.299998	0.287657	0.311653
9	0.917528	0.638331	0.448894	0.308542	0.524175	0.298094	0.294509	0.316591
9.1	0.913108	0.637205	0.447936	0.311642	0.527779	0.305193	0.298494	0.320242
9.2	0.919323	0.640367	0.45597	0.315482	0.529683	0.311611	0.301863	0.327439
9.3	0.92282	0.642683	0.456948	0.318332	0.537247	0.313426	0.304778	0.327812
9.4	0.919297	0.646679	0.461132	0.325507	0.542635	0.318878	0.308385	0.332917
9.5	0.928152	0.647337	0.462493	0.32705	0.542876	0.323292	0.314023	0.333684
9.6	0.927539	0.651944	0.464887	0.328481	0.542926	0.327638	0.315582	0.340921
9.7	0.929295	0.650292	0.468071	0.335087	0.551689	0.330293	0.32185	0.34432
9.8	0.931191	0.661471	0.473185	0.336966	0.552005	0.333558	0.323986	0.347896
9.9	0.934504	0.65722	0.472913	0.34087	0.559054	0.338705	0.328898	0.352184
10	0.931913	0.66279	0.475173	0.345225	0.558998	0.342965	0.332749	0.351615
10.1	0.938676	0.663344	0.480438	0.349067	0.563327	0.345482	0.334435	0.358266
10.2	0.941088	0.66267	0.482345	0.35261	0.565946	0.348641	0.342494	0.362246
10.3	0.943437	0.662367	0.4847	0.355704	0.566486	0.354724	0.343298	0.363982
10.4	0.94239	0.671779	0.489441	0.358199	0.572686	0.356754	0.346961	0.371532
10.5	0.942126	0.672981	0.484865	0.365183	0.573893	0.361837	0.350165	0.372823
10.6	0.942639	0.677083	0.496607	0.365634	0.573804	0.364593	0.354864	0.373285
10.7	0.946761	0.68099	0.494815	0.372215	0.576772	0.369056	0.359566	0.380969
10.8	0.948089	0.681528	0.500197	0.375276	0.584966	0.372728	0.362865	0.378684
10.9	0.94414	0.682819	0.500203	0.375285	0.58652	0.374632	0.369628	0.381532
11	0.94985	0.685557	0.502653	0.379748	0.588173	0.378609	0.372344	0.38997
11.1	0.948117	0.688887	0.505891	0.383834	0.592124	0.38463	0.3713	0.391381
11.2	0.950043	0.693469	0.504294	0.383439	0.593334	0.38421	0.374296	0.393378
11.3	0.955358	0.695247	0.510307	0.389519	0.596596	0.390219	0.383434	0.396951
11.4	0.953883	0.695499	0.51141	0.392266	0.596392	0.394196	0.385982	0.397066
11.5	0.954972	0.697143	0.516888	0.393042	0.59968	0.395523	0.386024	0.400732
11.6	0.954093	0.700254	0.515796	0.398741	0.604981	0.401469	0.393751	0.405482
11.7	0.960573	0.702688	0.515745	0.40001	0.610139	0.402432	0.392636	0.408674
11.8	0.955613	0.704956	0.522088	0.402569	0.610652	0.407386	0.396915	0.411488
11.9	0.963138	0.706597	0.524135	0.406103	0.610153	0.409321	0.399799	0.414972
12	0.958389	0.707821	0.525485	0.409789	0.610514	0.414491	0.402908	0.417033
12.1	0.959993	0.707345	0.525281	0.412547	0.618652	0.416154	0.407999	0.420492
12.2	0.958254	0.715273	0.529775	0.418383	0.61891	0.417921	0.409971	0.424113
12.3	0.963746	0.712215	0.527706	0.41584	0.621576	0.42537	0.413048	0.425664
12.4	0.962175	0.710055	0.532019	0.421478	0.624673	0.424852	0.419996	0.430069
12.5	0.965983	0.71553	0.530462	0.423855	0.626522	0.427933	0.418957	0.429397
12.6	0.962374	0.715189	0.535121	0.425342	0.627636	0.431136	0.423404	0.431702
12.7	0.963802	0.716681	0.537698	0.428313	0.62646	0.432114	0.427644	0.433211
12.8	0.963933	0.720591	0.540033	0.425465	0.629272	0.436384	0.430918	0.442643
12.9	0.964034	0.721109	0.540369	0.431265	0.634719	0.438882	0.431761	0.439395
13	0.96376	0.720207	0.542355	0.435466	0.635463	0.442369	0.435303	0.442013
13.1	0.965073	0.721882	0.545514	0.433186	0.637541	0.443133	0.43716	0.443702
13.2	0.96253	0.721599	0.543638	0.435102	0.639992	0.449219	0.44208	0.446527
13.3	0.965532	0.724018	0.548452	0.437714	0.640401	0.451319	0.442587	0.451089
13.4	0.964773	0.725209	0.548057	0.441044	0.64478	0.450722	0.447362	0.448367
13.5	0.968761	0.723736	0.551512	0.444388	0.645489	0.45457	0.449728	0.451288
13.6	0.971626	0.722887	0.55333	0.445654	0.646354	0.456298	0.447589	0.453985
13.7	0.967798	0.731193	0.556842	0.445584	0.653543	0.458874	0.453671	0.459101
13.8	0.96828	0.725836	0.556287	0.451983	0.64958	0.460627	0.456035	0.459919
13.9	0.971142	0.729395	0.561524	0.45161	0.653563	0.465486	0.460224	0.460415
14	0.967888	0.730473	0.557052	0.455976	0.653554	0.466503	0.458185	0.462137
14.1	0.967734	0.730742	0.56079	0.455867	0.657203	0.466069	0.465296	0.466254
14.2	0.967075	0.732282	0.560656	0.456864	0.658517	0.473033	0.464766	0.468474
14.3	0.966501	0.730045	0.56566	0.456934	0.658063	0.475167	0.468393	0.468057
14.4	0.967585	0.734215	0.567956	0.45939	0.661706	0.476514	0.469642	0.471473
14.5	0.971324	0.732114	0.56566	0.459678	0.659219	0.477447	0.471681	0.472087
14.6	0.966154	0.73417	0.568626	0.469628	0.662793	0.482611	0.475321	0.474274
14.7	0.967187	0.735859	0.569253	0.464977	0.66815	0.483686	0.479295	0.475338
14.8	0.969461	0.739174	0.571029	0.46862	0.667503	0.482866	0.479813	0.481947
14.9	0.97089	0.739636	0.568337	0.469043	0.668696	0.488394	0.480155	0.477534
15	0.971623	0.738359	0.570883	0.472941	0.671298	0.487517	0.481625	0.482779
15.1	0.968904	0.737808	0.572076	0.475187	0.670267	0.489251	0.487579	0.484675
15.2	0.96861	0.742042	0.572025	0.473173	0.670808	0.488831	0.49099	0.486453
15.3	0.967078	0.74445	0.571395	0.477886	0.676084	0.493482	0.491883	0.491821
15.4	0.967549	0.744296	0.571695	0.476052	0.674011	0.496313	0.494524	0.489007
15.5	0.967229	0.740308	0.576649	0.480468	0.679629	0.496719	0.495459	0.492429
15.6	0.968756	0.742739	0.577114	0.482182	0.680449	0.497657	0.49931	0.495297
15.7	0.968672	0.746198	0.576559	0.481703	0.677627	0.499534	0.498293	0.493782
15.8	0.965289	0.739407	0.582415	0.482516	0.678329	0.500998	0.498475	0.496546
15.9	0.962721	0.747214	0.582524	0.487304	0.680528	0.501617	0.505818	0.496966
16	0.967162	0.743845	0.581006	0.486635	0.681231	0.508305	0.49987	0.496431
16.1	0.9649	0.744705	0.582771	0.489937	0.687616	0.505815	0.504398	0.501483
16.2	0.965087	0.745758	0.583362	0.488545	0.682001	0.510128	0.507268	0.502709
16.3	0.968467	0.741751	0.586103	0.492429	0.686988	0.508795	0.506658	0.501838
16.4	0.966118	0.742655	0.584871	0.492286	0.689061	0.511483	0.512225	0.505753
16.5	0.96672	0.746352	0.586277	0.498374	0.690296	0.515617	0.510741	0.501553
16.6	0.965972	0.748662	0.588181	0.493989	0.688862	0.517613	0.515401	0.505594
16.7	0.96094	0.746651	0.588876	0.498747	0.69057	0.517062	0.517381	0.508016
16.8	0.963642	0.753056	0.588119	0.499537	0.693964	0.518526	0.519904	0.509318
16.9	0.9643	0.745016	0.591945	0.496907	0.694804	0.521245	0.520425	0.512525
17	0.95822	0.750796	0.589324	0.498223	0.694572	0.522856	0.518529	0.511912
17.1	0.956218	0.746937	0.593138	0.502667	0.692259	0.519375	0.52609	0.513278
17.2	0.964619	0.747965	0.595751	0.499377	0.69353	0.52527	0.526099	0.514648
17.3	0.965958	0.748595	0.589929	0.503211	0.696574	0.524077	0.525586	0.512995
17.4	0.963138	0.746587	0.594012	0.503594	0.69779	0.527611	0.527334	0.518655
17.5	0.959923	0.750118	0.592628	0.503701	0.699422	0.526821	0.526023	0.513483
17.6	0.957036	0.747707	0.597095	0.502961	0.69572	0.528193	0.527902	0.519011
17.7	0.958529	0.748217	0.597383	0.505392	0.699644	0.534407	0.529571	0.521436
17.8	0.962015	0.750642	0.59509	0.507249	0.696602	0.533559	0.531296	0.522343
17.9	0.954462	0.748374	0.596235	0.507302	0.701215	0.531615	0.531792	0.52087
18	0.961917	0.754311	0.594583	0.50966	0.700646	0.535102	0.532761	0.523323
18.1	0.957056	0.752255	0.594037	0.512399	0.703676	0.538574	0.538922	0.523643
18.2	0.953759	0.750785	0.597582	0.510814	0.705986	0.538642	0.531422	0.525057
18.3	0.954199	0.750393	0.599646	0.513785	0.704371	0.539756	0.537527	0.529171
18.4	0.954053	0.755235	0.597464	0.513141	0.707193	0.540468	0.537785	0.527759
18.5	0.955465	0.752202	0.594684	0.513779	0.703329	0.542011	0.53853	0.524872
18.6	0.954023	0.751687	0.600721	0.514746	0.701861	0.539177	0.539336	0.533494
18.7	0.950704	0.755963	0.599458	0.517106	0.705958	0.544861	0.541224	0.530252
18.8	0.954538	0.752171	0.601251	0.516485	0.705135	0.547477	0.544861	0.531912
18.9	0.952566	0.751591	0.601674	0.520475	0.71105	0.543128	0.54571	0.531377
19	0.955006	0.748965	0.601057	0.520232	0.711778	0.547337	0.546819	0.533957
19.1	0.95097	0.757192	0.597607	0.521318	0.712612	0.550409	0.547051	0.531982
19.2	0.956221	0.755274	0.603107	0.523643	0.711349	0.550725	0.547541	0.536244
19.3	0.951595	0.757425	0.603242	0.522405	0.712724	0.546368	0.550258	0.533623
19.4	0.947346	0.753991	0.598806	0.522436	0.713671	0.549583	0.550356	0.536835
19.5	0.950998	0.754498	0.602631	0.522951	0.711993	0.552148	0.549891	0.533993
19.6	0.95141	0.752745	0.605177	0.524183	0.713268	0.550661	0.550916	0.536555
19.7	0.948965	0.751031	0.603984	0.523822	0.712229	0.552588	0.553344	0.536331
19.8	0.946506	0.750015	0.605549	0.525569	0.713282	0.553509	0.556116	0.539776
19.9	0.942939	0.754187	0.606552	0.525622	0.713416	0.556113	0.551753	0.540902
20	0.945358	0.752328	0.604634	0.525001	0.713872	0.55641	0.558021	0.542022
20.1	0.941006	0.752283	0.604323	0.531201	0.710209	0.557735	0.557388	0.54387
20.2	0.946223	0.751659	0.606529	0.528983	0.718826	0.556318	0.555075	0.54315
20.3	0.947072	0.753591	0.607851	0.52791	0.716936	0.559046	0.558233	0.544763
20.4	0.939124	0.747486	0.606563	0.531621	0.715329	0.557029	0.561913	0.545743
20.5	0.942244	0.746063	0.606126	0.52886	0.712427	0.557813	0.560628	0.548936
20.6	0.935498	0.747721	0.606667	0.533618	0.713861	0.558415	0.560384	0.548048
20.7	0.935828	0.747492	0.607854	0.535721	0.715679	0.557687	0.563971	0.546603
20.8	0.938217	0.751513	0.608624	0.53478	0.718843	0.558684	0.562092	0.549126
20.9	0.936666	0.75365	0.607907	0.53376	0.717499	0.558323	0.56498	0.548157
21	0.932151	0.749931	0.608733	0.534836	0.71546	0.564506	0.565355	0.546962
21.1	0.936587	0.749463	0.608117	0.537057	0.713979	0.558264	0.567758	0.548009
21.2	0.938833	0.752602	0.61283	0.535948	0.715441	0.563056	0.562568	0.549658
21.3	0.935565	0.751048	0.609075	0.535729	0.713937	0.561633	0.566598	0.553243
21.4	0.934081	0.7489	0.612063	0.535553	0.719031	0.565013	0.566131	0.550835
21.5	0.932269	0.756363	0.60966	0.53609	0.715225	0.563369	0.565767	0.55373
21.6	0.928738	0.752037	0.610921	0.536477	0.719647	0.56666	0.565531	0.553481
21.7	0.92813	0.747007	0.610153	0.534623	0.718348	0.563591	0.564663	0.551854
21.8	0.93055	0.749541	0.614488	0.536197	0.718076	0.569914	0.56512	0.554909
21.9	0.929989	0.750886	0.611573	0.537757	0.719723	0.567553	0.569836	0.55419
22	0.930634	0.755476	0.610114	0.541268	0.719031	0.565145	0.569539	0.554727
22.1	0.932084	0.74953	0.610492	0.538308	0.718123	0.566422	0.566397	0.553792
22.2	0.927699	0.752037	0.609425	0.536737	0.720196	0.567282	0.574815	0.556267
22.3	0.925887	0.751471	0.614306	0.538	0.717787	0.566019	0.570594	0.560684
22.4	0.922832	0.750614	0.609641	0.537157	0.715978	0.57272	0.573591	0.553677
22.5	0.927153	0.750435	0.610988	0.539367	0.718588	0.569757	0.572605	0.55832
22.6	0.924974	0.747604	0.611528	0.541983	0.718863	0.569421	0.572079	0.556954
22.7	0.924265	0.746615	0.612444	0.540383	0.71947	0.568385	0.573711	0.557917
22.8	0.921157	0.746811	0.614802	0.544699	0.722512	0.570748	0.575596	0.55713
22.9	0.914206	0.749396	0.613497	0.543033	0.715964	0.570225	0.570757	0.558292
23	0.91664	0.746119	0.613116	0.546813	0.718653	0.570874	0.571264	0.558309
23.1	0.920376	0.747195	0.613099	0.552294	0.722305	0.570802	0.574986	0.558595
23.2	0.917556	0.746741	0.612898	0.549362	0.716852	0.57025	0.573865	0.558897
23.3	0.917589	0.747329	0.610044	0.551966	0.717076	0.569634	0.574683	0.559888
23.4	0.914307	0.751603	0.610719	0.552434	0.717555	0.56953	0.575574	0.55734
23.5	0.912733	0.748234	0.611581	0.553089	0.718734	0.574742	0.576226	0.558844
23.6	0.910412	0.745232	0.610963	0.556679	0.716989	0.573916	0.575604	0.559572
23.7	0.914352	0.7451	0.610481	0.550919	0.718989	0.574159	0.57808	0.563753
23.8	0.913503	0.742344	0.611979	0.55354	0.717132	0.575498	0.579178	0.561331
23.9	0.911297	0.74722	0.612052	0.551924	0.714934	0.575291	0.579066	0.561625
24	0.906861	0.74398	0.611831	0.555803	0.719958	0.566968	0.578256	0.558147
24.1	0.90872	0.745834	0.611735	0.551258	0.717983	0.577209	0.580917	0.560975
24.2	0.907875	0.744383	0.611993	0.554038	0.720714	0.573868	0.57876	0.561356
24.3	0.910227	0.747329	0.613217	0.552014	0.717597	0.578083	0.577355	0.565722
24.4	0.905371	0.744148	0.611861	0.55091	0.717099	0.57009	0.580791	0.566181
24.5	0.902965	0.743997	0.609716	0.552025	0.714326	0.575711	0.580802	0.562115
24.6	0.904181	0.738844	0.610624	0.551386	0.719274	0.575434	0.577862	0.565083
24.7	0.900045	0.743294	0.611822	0.551661	0.716597	0.576856	0.58307	0.563613
24.8	0.902103	0.746335	0.609823	0.550843	0.715012	0.576473	0.582804	0.564249
24.9	0.901114	0.742504	0.611875	0.552437	0.717575	0.576335	0.585075	0.562515
25	0.896155	0.743028	0.615258	0.554397	0.721165	0.577136	0.579732	0.563131
25.1	0.899367	0.742826	0.609924	0.551851	0.720375	0.578052	0.579323	0.565509
25.2	0.896673	0.736889	0.608551	0.554904	0.718493	0.578741	0.578438	0.56757
25.3	0.898661	0.736508	0.609613	0.554019	0.719188	0.576204	0.583698	0.56587
25.4	0.893307	0.737612	0.613217	0.553212	0.714116	0.577848	0.580693	0.565946
25.5	0.893262	0.733666	0.610584	0.553523	0.714161	0.577747	0.581146	0.562742
25.6	0.895765	0.736881	0.609963	0.554598	0.71569	0.576809	0.580007	0.567007
25.7	0.89166	0.739782	0.608243	0.554946	0.717681	0.577534	0.583334	0.566391
25.8	0.892453	0.736519	0.610164	0.553069	0.716351	0.58183	0.58346	0.561633
25.9	0.893674	0.732184	0.607857	0.555315	0.715278	0.57817	0.586809	0.569625
26	0.892497	0.732408	0.611016	0.555979	0.717141	0.57922	0.580049	0.567455
26.1	0.886392	0.732974	0.60784	0.555103	0.71436	0.581191	0.586336	0.561625
26.2	0.887678	0.735945	0.61008	0.55296	0.711915	0.583779	0.577338	0.562708
26.3	0.887473	0.734663	0.605496	0.555215	0.712842	0.579853	0.580732	0.567651
26.4	0.880243	0.733629	0.604757	0.556018	0.715345	0.57892	0.579998	0.564719
26.5	0.885113	0.731762	0.608098	0.560311	0.714693	0.578943	0.584255	0.565386
26.6	0.884771	0.73475	0.607098	0.558883	0.715808	0.580023	0.582085	0.565937
26.7	0.879848	0.731776	0.608476	0.556976	0.711646	0.579225	0.580329	0.566716
26.8	0.883536	0.728897	0.607577	0.560787	0.711867	0.579659	0.582418	0.567962
26.9	0.879338	0.730745	0.604253	0.55983	0.709784	0.575092	0.583507	0.567615
27	0.882085	0.730135	0.606395	0.559953	0.709495	0.575798	0.580847	0.564089
27.1	0.880568	0.728827	0.605944	0.562266	0.710428	0.577867	0.582213	0.565764
27.2	0.879148	0.727953	0.606835	0.559516	0.7101	0.576954	0.58092	0.567632
27.3	0.874832	0.729714	0.607176	0.558214	0.709896	0.579055	0.58043	0.569315
27.4	0.878736	0.726474	0.602399	0.554022	0.707501	0.575739	0.580866	0.566923
27.5	0.872936	0.723469	0.604132	0.558956	0.706535	0.579253	0.584048	0.566301
27.6	0.870971	0.724968	0.604295	0.557452	0.710476	0.578399	0.582877	0.5651
27.7	0.86952	0.724237	0.606454	0.55832	0.707451	0.579021	0.582883	0.564954
27.8	0.874062	0.725083	0.603483	0.553503	0.708686	0.579895	0.580191	0.568166
27.9	0.872735	0.724458	0.602603	0.55608	0.710106	0.577103	0.583048	0.567206
28	0.874409	0.718826	0.599383	0.554705	0.707717	0.578982	0.581992	0.566917
28.1	0.866767	0.719252	0.604796	0.555621	0.703472	0.578892	0.580348	0.569054
28.2	0.868856	0.720479	0.600951	0.553436	0.704211	0.57596	0.580071	0.565033
28.3	0.870377	0.718165	0.605533	0.554848	0.707059	0.57785	0.577733	0.566539
28.4	0.86647	0.715004	0.598128	0.553926	0.70837	0.579046	0.577806	0.567783
28.5	0.865748	0.717227	0.605465	0.556125	0.702192	0.576293	0.581432	0.566237
28.6	0.860869	0.717771	0.601727	0.551554	0.703738	0.576453	0.578559	0.565262
28.7	0.866442	0.718373	0.602665	0.553246	0.70353	0.575308	0.581872	0.56762
28.8	0.860346	0.717762	0.600567	0.556206	0.70553	0.574204	0.583429	0.564321
28.9	0.864289	0.717345	0.601864	0.552977	0.703802	0.573465	0.579844	0.564425
29	0.863281	0.714847	0.600679	0.554268	0.69966	0.580984	0.584585	0.567133
29.1	0.85908	0.717303	0.598123	0.55627	0.701195	0.57689	0.580304	0.567609
29.2	0.859332	0.717594	0.601323	0.553274	0.700825	0.574689	0.581947	0.564655
29.3	0.860012	0.716911	0.599789	0.55373	0.698184	0.574915	0.58111	0.563742
29.4	0.854266	0.713884	0.600184	0.556057	0.696395	0.576688	0.577525	0.56501
29.5	0.856069	0.714438	0.600752	0.556427	0.695236	0.57582	0.580169	0.56797
29.6	0.857495	0.714514	0.598425	0.552324	0.695804	0.579071	0.58169	0.564644
29.7	0.856602	0.710641	0.595933	0.552683	0.697532	0.577103	0.579284	0.563465
29.8	0.853207	0.711604	0.598285	0.553103	0.695628	0.574028	0.57857	0.563574
29.9	0.848113	0.713254	0.598114	0.553271	0.696098	0.57724	0.579928	0.567763

## Sheet: secondary data n=1-3
PCP	A	k1	k2	A	k1	k2	A	k1	k2	A avrg	A SEM	k1 avrg	k1 SEM	k2 avrg	k2 SEM
L	1.01456	2.60829	0.279734	1.00012	6.8012	0.290394	1.0088	3.58107	0.281887	1.00783	0.00419626	4.33019	1.26702	0.284005	0.00325424
DL	0.880532	1.82429	0.216059	0.812975	2.3559	0.220531	0.778329	1.04079	0.209017	0.823945	0.0300091	1.74033	0.381955	0.215202	0.00335129
DDL	0.744063	0.767718	0.179139	0.792519	1.54559	0.188004	0.621476	0.364016	0.214127	0.719353	0.0508981	0.89244	0.346744	0.193757	0.0105018
DDDL (len)	0.651136	0.221502	0.221502	0.577666	0.2339	0.233901	0.584751	0.195569	0.195569	0.604518	0.0233987	0.21699	0.0112928	0.216991	0.0112929
LDDD	0.752956	0.255605	0.255605	0.674241	0.330185	0.234573	0.739658	0.271392	0.271392	0.722285	0.0243267	0.285727	0.0226913	0.253857	0.0106646
DLDD	0.644	0.179016	0.179016	0.557892	0.196069	0.196069	0.62592	0.187602	0.187602	0.609271	0.0262139	0.187562	0.00492307	0.187562	0.00492294
DDLD	0.647744	0.163906	0.163906	0.56183	0.196469	0.196469	0.634844	0.180523	0.180523	0.614806	0.0267484	0.180299	0.00940083	0.180299	0.00940075
DDDL (position)	0.589947	0.188715	0.188715	0.552295	0.218983	0.218982	0.599332	0.195956	0.195956	0.580525	0.0143723	0.201218	0.00912515	0.201218	0.00912494
