# Supplementary material for: Towards a molecular mechanism underlying mitochondrial protein import through the TOM and TIM23 complexes
Source: eLife. 2022 Jun 8;11:e75426. doi: 10.7554/eLife.75426 (PMC9255969; doi:10.7554/eLife.75426)
Supplement: Figure 5—figure supplement 1—source data 1. — The data points that were averaged for values of O2 slope used to calculate fold increase in panel B are in bold, and derived values (corresponding to data in panel B) also provided. [file elife-75426-fig5-figsupp1-data1.xlsx]

## Sheet: 1 mg.ml primary data n=1
Time [min]	1A: O2 Concentration [nmol/ml]	1A: O2 Slope uncorr. [pmol/(s*ml)]	1B: O2 Concentration [nmol/ml]	1B: O2 Slope uncorr. [pmol/(s*ml)]	mitos	NADH	ADP	cyt c
0	242.329		241.138
0.03	242.298		241.185
0.07	242.282		241.185
0.1	242.282		241.185
0.13	242.298	3.8887	241.216	-7.7561
0.17	242.314	-2.3332	241.232	-6.2049
0.2	242.314	-4.6665	241.232	-6.9805
0.23	242.376	-10.1107	241.216	-3.8781
0.27	242.376	-10.8884	241.201	2.3268
0.3	242.376	-4.6665	241.216	-3.4127
0.33	242.36	-5.7553	241.232	-2.1717
0.37	242.329	-4.822	241.247	-2.3268
0.4	242.36	-4.0443	241.247	-2.1717
0.43	242.376	-3.2665	241.247	-1.5512
0.47	242.345	-2.6443	241.216	-2.6371
0.5	242.329	-2.6443	241.201	-1.3961
0.53	242.298	-1.5555	241.201	-0.7756
0.57	242.267	0	241.216	-0.1551
0.6	242.314	0.9333	241.216	0.3102
0.63	242.36	-0.6222	241.216	-1.0859
0.67	242.345	-0.7777	241.216	-0.4654
0.7	242.329	-0.4666	241.232	-0.3102
0.73	242.329	0	241.232	-0.1551
0.77	242.329	0.3111	241.247	-0.1551
0.8	242.298	-0.1555	241.247	-0.9307
0.83	242.314	-0.1555	241.247	-0.7756
0.87	242.36	-0.1555	241.247	-0.6205
0.9	242.36	0	241.232	-0.4654
0.93	242.36	0.1555	241.232	-0.3102
0.97	242.345	-0.4666	241.216	-0.7756
1	242.345	-0.4666	241.201	-0.4654
1.03	242.345	-0.3111	241.201	-0.3102
1.07	242.329	-0.1555	241.185	0
1.1	242.314	0.1555	241.154	0.3102
1.13	242.314	-0.1555	241.138	0
1.17	242.282	-0.1555	241.154	0.3102
1.2	242.267	0.1555	241.17	0.4654
1.23	242.282	0.3111	241.185	0.6205
1.27	242.298	0.6222	241.185	0.7756
1.3	242.298	0.1555	241.185	0.3102
1.33	242.267	0.3111	241.17	0.4654
1.37	242.236	0.4666	241.17	0.6205
1.4	242.22	0.7777	241.185	0.7756
1.43	242.22	1.0888	241.201	0.7756
1.47	242.236	1.2444	241.201	0.7756
1.5	242.267	1.3999	241.201	0.7756
1.53	242.282	1.3999	241.201	0.7756
1.57	242.236	1.3999	241.201	0.7756
1.6	242.22	1.5555	241.185	0.7756
1.63	242.205	1.5555	241.17	0.7756
1.67	242.189	1.711	241.154	0.9307
1.7	242.189	1.8666	241.123	0.9307
1.73	242.205	1.8666	241.092	1.0859
1.77	242.205	1.8666	241.061	1.241
1.8	242.22	1.8666	241.061	1.3961
1.83	242.251	1.8666	241.061	1.5512
1.87	242.282	1.8666	241.077	1.7064
1.9	242.298	1.8666	241.077	1.8615
1.93	242.282	1.711	241.092	2.0166
1.97	242.298	1.5555	241.077	2.0166
2	242.282	1.3999	241.061	2.1717
2.03	242.267	1.3999	241.061	2.1717
2.07	242.267	1.2444	241.092	2.1717
2.1	242.251	1.2444	241.123	2.1717
2.13	242.282	1.2444	241.123	2.0166
2.17	242.267	1.0888	241.107	2.0166
2.2	242.22	1.0888	241.107	1.8615
2.23	242.189	1.0888	241.092	1.7064
2.27	242.189	0.9333	241.061	1.7064
2.3	242.173	0.9333	241.061	1.7064
2.33	242.189	0.9333	241.061	1.7064
2.37	242.189	0.9333	241.061	1.7064
2.4	242.205	0.7777	241.077	1.7064
2.43	242.205	0.7777	241.077	1.7064
2.47	242.173	0.7777	241.061	1.8615
2.5	242.189	0.7777	241.046	1.8615
2.53	242.158	0.9333	241.03	2.0166
2.57	242.158	0.9333	240.999	2.0166
2.6	242.173	0.9333	240.999	2.1717
2.63	242.189	0.7777	241.014	2.1717
2.67	242.173	0.7777	241.014	2.1717
2.7	242.142	0.9333	240.999	2.1717
2.73	242.096	1.2444	240.999	2.1717
2.77	242.096	1.3999	240.999	2.1717
2.8	242.127	1.5555	240.983	2.1717
2.83	242.173	1.5555	240.999	2.0166
2.87	242.173	1.3999	240.983	2.0166
2.9	242.158	1.3999	240.937	2.0166
2.93	242.127	1.5555	240.906	2.0166
2.97	242.111	1.711	240.921	2.0166
3	242.127	1.8666	240.921	2.0166
3.03	242.127	2.0221	240.921	2.1717
3.07	242.111	2.1777	240.937	2.1717
3.1	242.127	2.3332	240.952	2.3268
3.13	242.142	2.3332	240.952	2.3268
3.17	242.142	2.3332	240.968	2.482
3.2	242.142	2.1777	240.968	2.482
3.23	242.127	2.0221	240.952	2.482
3.27	242.142	2.0221	240.921	2.482
3.3	242.189	1.711	240.906	2.6371
3.33	242.189	1.5555	240.89	2.6371
3.37	242.173	1.2444	240.875	2.7922
3.4	242.158	1.0888	240.859	2.9473
3.43	242.173	0.9333	240.875	2.9473
3.47	242.127	0.7777	240.906	2.7922
3.5	242.127	0.6222	240.906	2.6371
3.53	242.142	0.6222	240.89	2.6371
3.57	242.142	0.4666	240.89	2.482
3.6	242.111	0.4666	240.89	2.482
3.63	242.065	0.6222	240.859	2.482
3.67	242.096	0.6222	240.844	2.482
3.7	242.127	0.6222	240.859	2.482
3.73	242.127	0.6222	240.828	2.482
3.77	242.142	0.4666	240.828	2.482
3.8	242.127	0.4666	240.844	2.3268
3.83	242.065	0.4666	240.844	2.3268
3.87	242.64	-0.4666	240.875	2.1717
3.9	242.236	-0.6222	240.875	2.1717
3.93	242.018	-0.4666	240.844	2.1717
3.97	241.956	-0.1555	240.828	2.1717
4	241.94	0.1555	240.828	2.0166
4.03	241.94	0.4666	240.828	2.0166
4.07	241.893	0.9333	240.844	2.0166
4.1	241.754	1.711	240.828	1.8615
4.13	241.629	2.6443	240.828	1.8615
4.17	241.536	3.5776	241.356	0.7756
4.2	241.442	4.5109	241.945	-1.241
4.23	241.302	5.7553	241.263	-1.8615
4.27					0
4.27	241.209	7.1552	240.859	-1.7064	500
4.3	241.1	8.7107	240.751	-1.3961
4.33	240.991	10.2662	240.704	-0.9307
4.37	240.851	12.1328	240.658	-0.4654
4.4	240.696	13.9994	240.642	0
4.43	240.571	16.0215	240.58	0.4654
4.47	240.447	18.0436	240.487	1.0859
4.5	240.322	20.2213	240.363	1.8615
4.53	240.214	22.399	240.239	2.7922
4.57	240.12	24.5767	240.146	4.0332
4.6	239.996	26.7543	240.037	5.2742
4.63	239.887	28.932	239.929	6.6703
4.67	239.778	30.9542	239.804	8.2215
4.7	239.7	32.9763	239.711	9.9279
4.73	239.576	34.9984	239.634	11.7893
4.77	239.451	37.0205	239.556	13.4957
4.8	239.311	39.1982	239.463	15.202
4.83	239.187	41.2204	239.37	16.9084
4.87	239.062	43.2425	239.262	18.7699
4.9	238.969	45.1091	239.122	20.7865
4.93	238.829	46.9757	238.967	22.8031
4.97	238.689	48.8422	238.874	24.9748
5	238.565	50.7088	238.765	27.1465
5.03	238.44	52.2643	238.672	29.3182
5.07	238.363	53.6642	238.579	31.4899
5.1	238.269	54.9086	238.501	33.5065
5.13	238.191	55.9975	238.408	35.5231
5.17	238.083	56.9308	238.3	37.3846
5.2	237.943	56.6197	238.207	39.2461
5.23	237.803	56.9308	238.114	41.1076
5.27	237.709	57.3974	238.021	42.8139
5.3	237.569	57.8641	237.928	44.3651
5.33	237.445	58.1751	237.819	46.0715
5.37	237.336	58.3307	237.695	47.6227
5.4	237.258	58.1751	237.586	49.0188
5.43	237.149	58.1751	237.509	50.2598
5.47	237.056	58.0196	237.416	51.3457
5.5	236.978	57.8641	237.322	51.3457
5.53	236.869	57.553	237.198	49.9496
5.57	236.776	57.3974	237.105	49.7944
5.6	236.698	57.0863	237.043	49.9496
5.63	236.589	56.6197	236.966	50.1047
5.67	236.434	56.3086	236.857	50.2598
5.7	236.325	56.153	236.764	50.4149
5.73	236.247	55.8419	236.655	50.2598
5.77	236.123	55.6864	236.578	50.1047
5.8	236.029	55.5308	236.485	49.7944
5.83	235.905	55.3753	236.392	49.6393
5.87	235.78	55.3753	236.299	49.4842
5.9	235.656	55.2197	236.19	49.3291
5.93	235.532	55.0642	236.097	49.174
5.97	235.392	55.0642	236.004	49.0188
6	235.267	55.0642	235.864	49.0188
6.03	235.189	54.9086	235.771	49.0188
6.07	235.127	54.7531	235.678	48.8637
6.1	235.018	54.5975	235.585	48.7086
6.13	234.894	54.442	235.446	48.7086
6.17	234.754	54.442	235.337	48.7086
6.2	234.661	54.442	235.244	48.5535
6.23	234.552	54.2864	235.135	48.5535
6.27	234.458	54.2864	235.042	48.7086
6.3	234.318	54.2864	234.965	48.7086
6.33	234.194	54.442	234.856	48.8637
6.37	234.085	54.5975	234.732	49.0188
6.4	233.852	54.9086	234.654	49.174
6.43	233.525	55.6864	234.577	49.174
6.47	233.245	56.4641	234.484	49.174
6.5	233.012	57.553	234.406	49.174
6.53	232.732	58.9529	234.313	49.174
6.57	232.467	60.6639	234.236	49.0188
6.6						0
6.6	232.281	62.2194	234.143	49.0188		500
6.63	232.109	64.086	233.972	49.0188
6.67	231.923	65.797	233.677	49.4842
6.7	231.767	67.6636	233.382	50.2598
6.73	231.612	69.2191	233.119	51.3457
6.77	231.441	70.9301	232.839	52.5867
6.8	231.285	72.6412	232.607	54.1379
6.83	231.083	74.1966	232.436	55.6891
6.87	230.881	75.7521	232.281	57.2403
6.9	230.71	77.3076	232.11	58.9467
6.93	230.523	78.7076	231.94	60.4979
6.97	230.336	80.263	231.769	62.0492
7	230.165	81.663	231.599	63.7555
7.03	229.978	83.0629	231.412	65.3067
7.07	229.776	84.4629	231.257	67.0131
7.1	229.574	85.8628	231.118	68.5643
7.13	229.387	87.1072	230.963	69.9604
7.17	229.185	88.3516	230.823	71.3565
7.2	229.03	89.4404	230.668	72.7526
7.23	228.874	90.5292	230.528	73.9936
7.27	228.75	91.307	230.373	75.2346
7.3	228.61	92.0847	230.233	76.3205
7.33	228.501	92.7069	230.094	77.4063
7.37	228.33	93.018	229.923	78.3371
7.4	228.221	93.018	229.706	79.4229
7.43	228.112	92.8625	229.551	80.3537
7.47	227.941	92.7069	229.411	81.2844
7.5	227.785	92.2403	229.272	82.06
7.53	227.599	91.7736	229.132	82.8356
7.57	227.459	90.9959	228.961	83.4561
7.6	227.287	90.2181	228.806	83.9215
7.63	227.148	89.1293	228.636	84.3869
7.67	226.992	87.8849	228.465	84.6971
7.7	226.805	86.6405	228.294	85.0073
7.73	226.634	85.3961	228.17	85.0073
7.77	226.479	84.4629	228.031	84.8522
7.8	226.308	83.6851	227.891	84.542
7.83	226.152	82.9074	227.736	83.9215
7.87	225.981	82.4407	227.581	83.301
7.9	225.825	82.1296	227.441	82.3703
7.93	225.67	81.8185	227.317	81.1293
7.97	225.53	81.3519	227.162	80.0434
8	225.421	81.0408	226.991	79.1127
8.03	225.25	80.5741	226.852	78.3371
8.07	225.032	80.263	226.743	77.7166
8.1	224.861	79.9519	226.557	77.2512
8.13	224.69	79.6408	226.386	77.0961
8.17	224.503	79.3297	226.216	76.941
8.2	224.348	79.1742	226.061	76.7858
8.23	224.223	79.0187	225.921	76.6307
8.27	224.099	78.8631	225.766	76.6307
8.3	223.928	78.7076	225.611	76.4756
8.33	223.788	78.552	225.44	76.4756
8.37	223.663	78.3965	225.285	76.4756
8.4	223.508	78.2409	225.145	76.4756
8.43	223.368	78.2409	224.99	76.4756
8.47	223.228	78.2409	224.866	76.4756
8.5	223.057	78.2409	224.726	76.3205
8.53	222.901	78.3965	224.587	76.3205
8.57	222.73	78.552	224.447	76.1653
8.6	222.59	78.7076	224.308	76.0102
8.63	222.481	78.552	224.168	75.7
8.67	222.294	78.552	224.029	75.3897
8.7	222.092	78.552	223.873	75.2346
8.73	221.905	78.7076	223.734	75.0795
8.77	221.766	78.552	223.563	75.0795
8.8	221.625	78.3965	223.423	74.9244
8.83	221.454	78.3965	223.268	74.7692
8.87	221.299	78.2409	223.129	74.6141
8.9	221.159	78.2409	222.989	74.6141
8.93	221.003	78.0854	222.85	74.459
8.97	220.832	78.0854	222.725	74.3039
9	220.661	77.9298	222.57	74.1487
9.03	220.49	77.9298	222.415	74.1487
9.07	220.319	78.0854	222.26	74.1487
9.1	220.179	78.0854	222.12	73.9936
9.13	220.008	78.0854	221.981	73.8385
9.17	219.806	78.2409	221.841	73.8385
9.2	219.65	78.3965	221.702	73.6834
9.23	219.448	78.7076	221.531	73.5282
9.27	219.214	79.0187	221.391	73.3731
9.3	219.043	79.3297	221.283	73.218
9.33							0
9.33	218.795	79.7964	221.174	72.9078			500
9.37	218.53	80.4186	221.004	72.7526
9.4	218.219	81.3519	220.88	72.4424
9.43	217.877	82.5963	220.74	72.2873
9.47	217.581	84.1518	220.538	72.1321
9.5	217.239	85.8628	220.29	72.2873
9.53	216.881	87.8849	220.026	72.5975
9.57	216.539	90.2181	219.732	73.218
9.6	216.166	92.7069	219.452	73.9936
9.63	215.792	95.3512	219.158	75.0795
9.67	215.419	98.3067	218.847	76.4756
9.7	215.077	101.262	218.522	78.1819
9.73	214.704	104.373	218.18	80.0434
9.77	214.346	107.64	217.839	82.2151
9.8	214.004	110.906	217.498	84.542
9.83	213.646	114.328	217.141	87.1791
9.87	213.304	117.75	216.815	89.9713
9.9	212.962	121.328	216.489	92.7635
9.93	212.619	124.75	216.148	95.8659
9.97	212.246	128.172	215.791	98.9684
10	211.873	131.75	215.45	102.381
10.03	211.468	135.483	215.14	105.639
10.07	211.079	139.216	214.814	109.051
10.1	210.69	142.949	214.488	112.619
10.13	210.348	146.527	214.116	116.187
10.17	210.022	149.949	213.79	119.755
10.2	209.664	153.215	213.48	123.323
10.23	209.322	156.482	213.17	126.735
10.27	208.979	159.282	212.844	130.148
10.3	208.591	162.237	212.518	133.561
10.33	208.202	165.037	212.162	136.818
10.37	207.813	167.526	211.82	140.076
10.4	207.486	170.014	211.494	143.333
10.43	207.128	172.037	211.153	146.281
10.47	206.786	173.903	210.797	149.228
10.5	206.413	175.459	210.471	152.02
10.53	206.04	176.859	210.13	154.502
10.57	205.651	178.103	209.804	156.984
10.6	205.309	179.036	209.478	159.156
10.63	204.951	179.659	209.152	161.018
10.67	204.624	180.125	208.811	162.569
10.7	204.204	180.436	208.47	163.965
10.73	203.846	180.592	208.128	165.051
10.77	203.489	180.903	207.803	165.671
10.8	203.131	181.059	207.477	166.137
10.83	202.742	181.059	207.136	166.602
10.87	202.369	181.214	206.794	166.757
10.9	202.011	181.37	206.484	166.912
10.93	201.669	181.37	206.158	166.912
10.97	201.311	181.37	205.864	166.912
11	200.953	181.525	205.538	166.757
11.03	200.58	181.525	205.181	166.602
11.07	200.207	181.681	204.809	166.602
11.1	199.849	181.681	204.483	166.447
11.13	199.475	181.836	204.157	166.447
11.17	199.087	181.992	203.832	166.447
11.2	198.713	181.992	203.506	166.447
11.23	198.356	181.992	203.196	166.292
11.27	197.998	181.992	202.854	166.292
11.3	197.655	181.992	202.528	166.137
11.33	197.313	181.836	202.203	166.137
11.37	196.987	181.836	201.846	166.137
11.4	196.598	181.836	201.489	166.137
11.43	196.256	181.836	201.163	166.137
11.47	195.898	181.836	200.822	166.292
11.5	195.54	181.681	200.496	166.292
11.53	195.167	181.681	200.186	166.292
11.57	194.793	181.681	199.876	166.137
11.6	194.436	181.525	199.566	165.982
11.63	194.078	181.37	199.224	165.826
11.67	193.72	181.37	198.868	165.826
11.7	193.362	181.37	198.542	165.826
11.73	193.005	181.214	198.216	165.671
11.77								0
11.77	192.662	181.059	197.906	165.516				500
11.8	192.398	180.747	197.565	165.516
11.83	192.04	180.436	197.239	165.516
11.87	191.605	180.281	196.913	165.361
11.9	191.2	180.281	196.541	165.516
11.93	190.889	180.125	196.184	165.516
11.97	190.516	179.97	195.812	165.671
12	190.096	179.97	195.439	165.826
12.03	189.707	179.97	195.083	166.137
12.07	189.365	179.97	194.726	166.447
12.1	188.929	180.125	194.369	166.757
12.13	188.525	180.436	194.028	167.067
12.17	188.136	180.592	193.702	167.378
12.2	187.794	180.903	193.376	167.688
12.23	187.389	181.214	193.019	167.998
12.27	187.032	181.525	192.616	168.308
12.3	186.674	181.836	192.244	168.774
12.33	186.378	181.836	191.903	169.084
12.37	186.005	181.992	191.546	169.549
12.4	185.554	182.303	191.189	170.015
12.43	185.103	182.769	190.848	170.48
12.47	184.714	183.236	190.506	170.945
12.5	184.418	183.703	190.181	171.256
12.53	184.061	184.014	189.808	171.721
12.57	183.625	184.636	189.421	172.186
12.6	183.221	185.103	189.048	172.652
12.63	182.91	185.569	188.676	173.117
12.67	182.521	185.881	188.319	173.583
12.7	182.132	186.192	187.962	174.048
12.73	181.758	186.658	187.621	174.668
12.77	181.37	186.969	187.264	175.134
12.8	180.95	187.28	186.892	175.599
12.83	180.576	187.747	186.489	176.22
12.87	180.234	188.058	186.116	176.685
12.9	179.845	188.369	185.775	177.15
12.93	179.441	188.68	185.449	177.461
12.97	179.036	189.147	185.124	177.771
13	178.632	189.458	184.782	177.926
13.03	178.274	189.769	184.426	178.236
13.07	177.885	190.236	184.069	178.391
13.1	177.528	190.391	183.727	178.391
13.13	177.17	190.391	183.34	178.391
13.17	176.75	190.236	182.967	178.546
13.2	176.392	190.391	182.611	178.546
13.23	176.081	190.236	182.254	178.546
13.27	175.723	190.08	181.882	178.546
13.3	175.334	189.925	181.525	178.546
13.33	174.93	189.769	181.153	178.702
13.37	174.494	189.925	180.796	178.857
13.4	174.106	189.769	180.439	179.012
13.43	173.763	189.925	180.067	179.167
13.47	173.39	189.925	179.71	179.167
13.5	173.017	189.925	179.353	179.322
13.53	172.612	190.08	179.012	179.322
13.57	172.301	189.925	178.655	179.167
13.6	171.928	189.925	178.298	179.167
13.63	171.554	189.769	177.941	179.322
13.67	171.212	189.458	177.585	179.322
13.7	170.855	188.992	177.212	179.322
13.73	170.403	188.992	176.856	179.322
13.77	169.983	188.992	176.499	179.322
13.8	169.61	189.147	176.158	179.322
13.83	169.284	188.992	175.832	179.167
13.87	168.879	188.836	175.49	179.012
13.9	168.459	188.836	175.149	178.857
13.93	168.101	188.992	174.777	178.702
13.97	167.79	188.68	174.42	178.546
14	167.448	188.525	174.017	178.702
14.03	167.075	188.214	173.676	178.546
14.07	166.639	188.214	173.319	178.546
14.1	166.266	188.058	172.977	178.546
14.13	165.861	188.058	172.605	178.391
14.17	165.457	188.058	172.249	178.546
14.2	165.084	188.058	171.876	178.702
14.23	164.741	188.058	171.535	178.702
14.27	164.43	187.903	171.163	178.702
14.3	164.104	187.747	170.775	178.857
14.33	163.901	187.28	170.418	178.857
14.37	163.653	186.658	170.077	178.702
14.4	163.388	185.881	169.767	178.546

## Sheet: 1 mg.ml primary data n=2
Time [min]	1A: O2 Concentration [nmol/ml]	1A: O2 Slope uncorr. [pmol/(s*ml)]	1B: O2 Concentration [nmol/ml]	1B: O2 Slope uncorr. [pmol/(s*ml)]	mitos	NADH	ADP	cyt c
0	244.541		244.833
0.03	244.572		244.802
0.07	244.526		244.802
0.1	244.541		244.817
0.13	244.526	3.0951	244.817	0.7778
0.17	244.51	6.1901	244.817	-2.3335
0.2	244.526	1.5475	244.802	0
0.23	244.541	0	244.802	2.3335
0.27	244.557	-4.6426	244.786	3.8892
0.3	244.495	1.5475	244.802	1.2445
0.33	244.464	3.2498	244.786	1.089
0.37	244.479	2.9403	244.77	2.0224
0.4	244.479	3.5593	244.77	2.8002
0.43	244.479	3.5593	244.77	2.8002
0.47	244.495	2.7856	244.755	2.1779
0.5	244.495	2.6308	244.739	2.3335
0.53	244.51	1.857	244.739	2.8002
0.57	244.526	1.3928	244.739	3.1114
0.6	244.541	0.4643	244.755	2.9558
0.63	244.495	1.238	244.77	2.1779
0.67	244.479	1.238	244.77	1.8668
0.7	244.417	1.3928	244.77	1.7112
0.73	244.417	1.857	244.77	1.7112
0.77	244.433	2.0118	244.786	1.2445
0.8	244.433	2.1665	244.786	1.2445
0.83	244.464	2.1665	244.77	1.089
0.87	244.479	1.857	244.739	1.089
0.9	244.541	1.3928	244.708	1.2445
0.93	244.557	0.9285	244.708	1.4001
0.97	244.557	0.9285	244.693	1.5557
1	244.541	0.619	244.677	1.7112
1.03	244.541	0.3095	244.661	1.8668
1.07	244.572	0	244.677	2.0224
1.1	244.588	-0.4643	244.693	2.0224
1.13	244.541	0	244.693	2.0224
1.17	244.479	0	244.661	2.0224
1.2	244.464	0	244.677	2.0224
1.23	244.479	0	244.693	2.0224
1.27	244.479	-0.1548	244.693	2.0224
1.3	244.417	0.4643	244.677	2.0224
1.33	244.386	0.4643	244.661	2.0224
1.37	244.386	0.619	244.661	2.0224
1.4	244.417	0.619	244.646	2.0224
1.43	244.402	0.7738	244.646	2.0224
1.47	244.417	0.7738	244.646	2.0224
1.5	244.402	0.9285	244.661	2.0224
1.53	244.402	1.0833	244.646	2.0224
1.57	244.417	1.0833	244.63	2.0224
1.6	244.448	0.9285	244.615	2.0224
1.63	244.448	0.9285	244.615	2.0224
1.67	244.464	0.9285	244.63	2.0224
1.7	244.448	0.9285	244.63	2.0224
1.73	244.417	1.0833	244.63	2.0224
1.77	244.433	1.0833	244.63	2.0224
1.8	244.433	1.238	244.615	2.1779
1.83	244.433	1.238	244.584	2.1779
1.87	244.433	1.238	244.568	2.3335
1.9	244.433	1.0833	244.553	2.4891
1.93	244.448	0.9285	244.568	2.4891
1.97	244.417	1.0833	244.568	2.4891
2	244.402	1.0833	244.584	2.4891
2.03	244.433	1.238	244.568	2.4891
2.07	244.479	1.238	244.568	2.3335
2.1	244.448	1.238	244.568	2.3335
2.13	244.417	1.3928	244.568	2.1779
2.17	244.433	1.5475	244.553	2.0224
2.2	244.433	1.5475	244.553	2.0224
2.23	244.417	1.3928	244.553	2.0224
2.27	244.371	1.3928	244.522	2.0224
2.3	244.386	1.238	244.506	2.1779
2.33	244.371	1.238	244.49	2.3335
2.37	244.355	1.238	244.49	2.3335
2.4	244.355	1.0833	244.506	2.4891
2.43	244.34	0.9285	244.506	2.4891
2.47	244.293	0.9285	244.49	2.4891
2.5	244.201	1.238	244.49	2.6447
2.53	244.077	1.7023	244.49	2.6447
2.57	243.969	2.3213	244.475	2.6447
2.6	243.86	3.2498	244.475	2.6447
2.63	243.783	4.1783	244.49	2.4891
2.67	243.613	5.4164	244.506	2.4891
2.7	243.411	7.1187	244.522	2.3335
2.73	243.226	8.8209	244.537	2.3335
2.77	243.071	10.8327	244.537	2.1779
2.8	242.901	12.9993	249.826	-7.6228
2.83	242.731	15.3206	247.042	-11.9787
2.87	242.607	17.7966	245.082	-12.2899
2.9	242.467	20.2727	244.941	-12.4454
2.93	242.313	22.7487	245.004	-12.601
2.97	242.173	25.3795	245.066	-12.7566
3	242.096	27.8556	245.05	-12.9121
3.03					0
3.03	241.988	30.3316	244.988	-12.9121	500
3.07	241.833	32.8077	244.895	-12.7566
3.1	241.678	35.4385	244.786	-12.4454
3.13	241.523	38.0693	244.677	-11.8232
3.17	241.4	40.7001	244.553	-10.8897
3.2	241.291	43.1762	244.413	-9.6452
3.23	241.137	45.6522	244.288	-8.0895
3.27	240.951	48.1283	244.164	-6.5338
3.3	240.796	50.6043	244.039	-4.667
3.33	240.564	53.2351	243.93	-2.8002
3.37	240.363	55.7112	243.837	-0.6223
3.4	240.255	58.0325	243.728	1.5557
3.43	240.069	60.3538	243.619	3.8892
3.47	239.96	62.5203	243.495	6.3783
3.5	239.852	64.3774	243.37	9.0229
3.53	239.775	65.9249	243.246	11.8232
3.57	239.636	67.3177	243.106	14.6234
3.6	239.512	68.7105	242.95	17.7347
3.63	239.372	69.7937	242.779	21.0017
3.67	239.187	70.7223	242.624	24.4241
3.7	239.063	71.496	242.499	28.0022
3.73	238.893	72.115	242.39	31.4247
3.77	238.753	72.4245	242.266	35.0028
3.8	238.568	72.5793	242.157	38.4252
3.83	238.335	72.8888	242.032	42.0033
3.87	238.15	73.3531	241.908	45.5814
3.9	238.088	73.3531	241.784	49.0039
3.93	237.902	73.5078	241.659	52.5819
3.97	237.732	73.5078	241.535	56.0044
4	237.593	73.5078	241.426	59.4269
4.03	237.469	73.5078	241.301	62.6938
4.07	237.33	73.6626	241.208	65.8052
4.1	237.19	73.8173	241.099	68.761
4.13	236.989	73.9721	240.99	61.4493
4.17	236.788	74.4363	240.866	58.8046
4.2	236.649	74.7458	240.741	59.738
4.23	236.556	74.9006	240.617	60.6714
4.27	236.386	75.2101	240.492	61.2937
4.3	236.246	75.5196	240.383	61.6049
4.33	236.092	75.5196	240.274	61.7604
4.37	235.906	75.6744	240.166	61.6049
4.4	235.736	75.8291	240.041	61.6049
4.43	235.55	75.9839	239.932	61.4493
4.47	235.426	76.1386	239.808	61.2937
4.5	235.271	76.2934	239.637	61.2937
4.53	235.101	76.2934	239.497	61.2937
4.57	234.993	76.2934	239.372	61.2937
4.6	234.869	76.1386	239.248	61.2937
4.63	234.761	76.1386	239.139	61.2937
4.67	234.652	75.9839	239.014	61.2937
4.7	234.482	76.1386	238.905	61.1381
4.73	234.389	76.1386	238.797	60.9826
4.77	234.266	76.1386	238.672	60.827
4.8	234.095	75.9839	238.563	60.6714
4.83	233.925	75.9839	238.454	60.3603
4.87	233.817	75.6744	238.361	60.2047
4.9	233.77	75.2101	238.252	59.8936
4.93	233.693	74.4363	238.128	59.738
4.97	233.585	73.6626	237.988	59.5825
5	233.368	73.1983	237.879	59.5825
5.03	233.167	72.734	237.77	59.5825
5.07	232.996	72.2698	237.645	59.5825
5.1	232.857	71.8055	237.536	59.4269
5.13	232.702	71.496	237.428	59.4269
5.17	232.532	71.3413	237.319	59.2713
5.2	232.377	71.3413	237.179	59.2713
5.23	232.238	71.1865	237.054	59.2713
5.27	232.083	71.0318	236.93	59.2713
5.3	231.991	70.877	236.821	59.4269
5.33	231.929	70.5675	236.712	59.2713
5.37	231.743	70.258	236.556	59.4269
5.4	231.635	69.9485	236.432	59.4269
5.43	231.464	69.639	236.308	59.4269
5.47	231.294	69.4842	236.199	59.4269
5.5	231.124	69.639	236.09	59.4269
5.53	230.969	69.639	236.028	59.2713
5.57	230.784	69.639	235.919	59.1158
5.6	230.644	69.7937	235.81	58.9602
5.63	230.536	69.7937	235.701	58.8046
5.67	230.35	69.7937	235.592	58.6491
5.7	230.103	70.258	235.499	58.3379
5.73	229.901	70.7223	235.358	58.1824
5.77	229.855	71.1865	235.219	58.0268
5.8	229.762	71.496	235.078	57.8712
5.83						0
5.83	229.484	71.9603	234.954	57.8712		500
5.87	229.097	73.0435	234.83	57.8712
5.9	228.911	74.1268	234.69	58.0268
5.93	228.756	75.2101	234.503	58.3379
5.97	228.524	76.1386	234.316	58.6491
6	228.199	77.5314	234.114	59.1158
6.03	227.89	79.0789	233.896	59.738
6.07	227.704	80.4717	233.694	60.5159
6.1	227.58	81.8645	233.429	61.6049
6.13	227.363	83.2573	233.212	62.6938
6.17	227.147	84.65	233.01	63.9384
6.2	226.946	86.0428	232.792	65.1829
6.23	226.636	87.5904	232.605	66.4275
6.27	226.342	88.9831	232.418	67.8276
6.3	226.095	90.3759	232.216	69.3832
6.33	225.893	91.9235	231.998	70.7834
6.37	225.63	93.6257	231.78	72.4946
6.4	225.445	95.328	231.563	74.0503
6.43	225.259	96.8756	231.376	75.7615
6.47	225.042	98.2683	231.158	77.3172
6.5	224.81	99.8159	230.956	79.0284
6.53	224.47	101.673	230.754	80.7397
6.57	224.207	103.375	230.536	82.4509
6.6	223.944	105.232	230.287	84.3178
6.63	223.68	106.78	230.054	86.1846
6.67	223.495	108.172	229.836	87.8958
6.7	223.263	109.565	229.634	89.7626
6.73	223.03	110.803	229.4	91.6294
6.77	222.814	111.887	229.198	93.3407
6.8	222.551	112.97	228.98	95.2075
6.83	222.427	113.744	228.778	96.7632
6.87	222.195	114.517	228.591	98.1633
6.9	221.854	115.446	228.405	99.4078
6.93	221.607	116.22	228.187	100.652
6.97	221.452	116.529	227.985	101.741
7	221.204	116.993	227.782	102.519
7.03	220.926	117.458	227.58	103.297
7.07	220.756	117.767	227.362	103.919
7.1	220.462	117.922	227.129	104.542
7.13	220.229	117.767	226.927	105.008
7.17	220.044	117.612	226.756	105.164
7.2	219.812	117.767	226.553	105.319
7.23	219.595	117.612	226.351	105.164
7.27	219.347	117.612	226.165	105.008
7.3	219.192	117.303	225.947	104.853
7.33	218.929	117.148	225.729	104.697
7.37	218.697	117.303	225.511	104.697
7.4	218.527	117.148	225.309	104.542
7.43	218.218	116.993	225.122	104.386
7.47	217.893	116.993	224.935	104.23
7.5	217.707	116.839	224.733	104.23
7.53	217.49	116.529	224.531	104.075
7.57	217.243	116.374	224.313	103.919
7.6	217.026	116.374	224.08	103.764
7.63	216.716	116.529	223.878	103.608
7.67	216.484	116.684	223.691	103.453
7.7	216.376	116.529	223.489	103.297
7.73	216.128	116.374	223.286	103.141
7.77	215.804	116.22	223.1	102.986
7.8	215.633	116.065	222.898	102.675
7.83	215.401	115.755	222.695	102.519
7.87	215.107	115.91	222.477	102.364
7.9	214.89	115.91	222.291	102.052
7.93	214.674	116.065	222.073	101.897
7.97	214.457	116.22	221.886	101.897
8	214.24	116.22	221.7	101.741
8.03	214.008	116.22	221.513	101.586
8.07	213.792	116.22	221.311	101.43
8.1	213.56	116.22	221.062	101.43
8.13	213.405	116.22	220.86	101.586
8.17	213.157	115.91	220.657	101.586
8.2	212.925	115.601	220.455	101.586
8.23	212.693	115.601	220.253	101.43
8.27	212.399	115.601	220.066	101.43
8.3	212.198	115.601	219.88	101.275
8.33	211.981	115.446	219.677	101.275
8.37	211.718	115.601	219.475	101.119
8.4	211.563	115.291	219.273	101.119
8.43	211.347	115.291	219.071	101.119
8.47	211.068	115.291	218.884	101.119
8.5	210.96	114.982	218.666	100.963
8.53	210.789	114.517	218.464	100.963
8.57	210.48	114.363	218.262	100.963
8.6	210.248	114.053	218.028	100.963
8.63	210	113.744	217.826	100.963
8.67	209.675	113.744	217.639	100.963
8.7	209.412	113.744	217.437	100.963
8.73	209.242	113.434	217.25	100.963
8.77	208.979	113.434	217.048	100.963
8.8	208.7	113.589	216.846	100.808
8.83	208.515	113.744	216.628	100.808
8.87	208.375	113.589	216.441	100.808
8.9	208.019	113.744	216.255	100.808
8.93	207.632	114.053	216.068	100.652
8.97	207.23	114.982	215.85	100.808
9	206.828	116.065	215.679	100.652
9.03	206.565	116.993	215.524	100.497
9.07							0
9.07	206.178	118.231	215.337	100.341			500
9.1	205.775	119.934	215.104	100.186
9.13	205.419	121.481	214.777	100.341
9.17	205.017	123.338	214.466	100.652
9.2	204.553	125.66	214.124	101.275
9.23	204.135	128.291	213.781	102.052
9.27	203.81	130.767	213.423	103.141
9.3	203.392	133.397	213.05	104.386
9.33	202.882	136.338	212.661	105.942
9.37	202.464	139.588	212.288	107.653
9.4	202.03	142.837	211.915	109.675
9.43	201.566	146.242	211.51	111.853
9.47	201.21	149.492	211.137	114.342
9.5	200.823	152.896	210.748	116.987
9.53	200.436	156.146	210.374	119.787
9.57	199.988	159.551	209.985	122.743
9.6	199.585	163.11	209.612	125.699
9.63	199.09	166.669	209.208	128.81
9.67	198.579	170.383	208.803	132.077
9.7	198.131	174.252	208.399	135.5
9.73	197.759	177.811	208.01	138.922
9.77	197.357	181.061	207.636	142.345
9.8	196.97	184.466	207.247	145.767
9.83	196.63	187.251	206.858	149.19
9.87	196.181	189.727	206.485	152.768
9.9	195.655	192.513	206.096	156.19
9.93	195.268	195.144	205.723	159.613
9.97	194.896	197.465	205.318	162.88
10	194.447	199.786	204.961	166.146
10.03	194.061	201.953	204.572	169.258
10.07	193.751	203.501	204.214	172.214
10.1	193.302	204.893	203.84	175.014
10.13	192.838	206.286	203.467	177.658
10.17	192.389	207.369	203.094	180.148
10.2	192.002	207.834	202.689	182.481
10.23	191.538	208.298	202.285	184.503
10.27	191.089	208.917	201.896	186.37
10.3	190.733	209.226	201.523	188.082
10.33	190.331	209.691	201.134	189.482
10.37	189.975	209.691	200.76	190.415
10.4	189.511	209.691	200.387	191.037
10.43	189.078	209.691	200.013	191.348
10.47	188.706	209.536	199.625	191.66
10.5	188.211	209.381	199.22	191.815
10.53	187.762	209.381	198.831	191.971
10.57	187.422	209.381	198.458	191.971
10.6	186.988	209.072	198.084	191.971
10.63	186.632	208.762	197.727	191.815
10.67	186.184	208.607	197.369	191.66
10.7	185.673	208.607	196.98	191.504
10.73	185.271	208.762	196.591	191.348
10.77	184.961	208.607	196.171	191.348
10.8	184.497	208.607	195.798	191.193
10.83	183.955	208.607	195.424	191.193
10.87	183.491	208.607	195.035	191.037
10.9	183.089	208.762	194.662	191.037
10.93	182.686	208.762	194.289	190.882
10.97	182.222	209.072	193.931	190.726
11	181.742	209.536	193.558	190.571
11.03	181.324	210	193.153	190.571
11.07	180.999	210.31	192.78	190.571
11.1	180.597	210.619	192.391	190.571
11.13	180.117	210.774	192.002	190.571
11.17	179.653	211.083	191.628	190.571
11.2	179.204	211.238	191.239	190.571
11.23	178.756	211.857	190.866	190.571
11.27	178.322	212.321	190.493	190.571
11.3	177.935	212.631	190.088	190.571
11.33	177.518	212.94	189.699	190.571
11.37	177.069	213.25	189.326	190.571
11.4	176.682	213.25	188.953	190.571
11.43	176.249	213.405	188.579	190.571
11.47	175.831	213.56	188.206	190.415
11.5	175.49	213.56	187.817	190.415
11.53	175.072	213.56	187.428	190.415
11.57	174.639	213.56	187.024	190.415
11.6	174.252	213.714	186.604	190.571
11.63	173.896	213.405	186.23	190.726
11.67	173.417	213.25	185.841	190.726
11.7	172.983	213.095	185.452	190.882
11.73	172.581	212.786	185.048	191.037
11.77	172.132	212.631	184.674	191.193
11.8	171.73	212.476	184.301	191.348
11.83	171.374	212.167	183.881	191.504
11.87	170.94	212.012	183.523	191.66
11.9	170.554	211.548	183.15	191.815
11.93	170.167	211.083	182.777	191.971
11.97	169.687	210.619	182.403	191.971
12	169.223	210.31	182.03	191.971
12.03	168.882	210	181.672	191.815
12.07	168.495	209.536	181.314	191.815
12.1	168.124	208.762	180.941	191.66
12.13	167.722	208.143	180.568	191.66
12.17	167.288	207.679	180.194	191.504
12.2								0
12.2	166.917	207.369	179.821	191.504				500
12.23	166.53	206.905	179.432	191.348
12.27	166.143	206.286	179.059	191.348
12.3	165.679	205.977	178.763	190.882
12.33	165.23	205.822	178.436	190.571
12.37	164.797	205.667	178.11	190.104
12.4	164.363	205.358	177.736	189.637
12.43	163.946	205.048	177.363	189.171
12.47	163.528	204.893	176.974	188.704
12.5	163.095	204.893	176.57	188.393
12.53	162.661	205.048	176.165	188.082
12.57	162.181	205.358	175.761	187.77
12.6	161.702	205.667	175.34	187.615
12.63	161.268	206.131	174.936	187.615
12.67	160.82	206.596	174.5	187.615
12.7	160.386	207.215	174.096	187.77
12.73	159.969	207.679	173.723	187.77
12.77	159.52	208.298	173.318	187.77
12.8	159.086	208.762	172.914	187.926
12.83	158.653	209.381	172.509	188.082
12.87	158.189	209.845	172.105	188.393
12.9	157.74	210.464	171.685	188.704
12.93	157.307	211.083	171.265	189.171
12.97	156.858	211.548	170.86	189.637
13	156.425	212.167	170.471	190.104
13.03	155.96	212.94	170.082	190.571
13.07	155.512	213.56	169.678	191.193
13.1	155.078	214.333	169.273	191.815
13.13	154.583	215.262	168.853	192.437
13.17	154.134	215.881	168.402	193.215
13.2	153.685	216.655	167.998	193.993
13.23	153.237	217.428	167.593	194.927
13.27	152.788	218.047	167.204	195.704
13.3	152.37	218.821	166.815	196.327
13.33	151.937	219.595	166.411	197.104
13.37	151.504	220.214	166.006	197.882
13.4	151.008	220.833	165.586	198.505
13.43	150.544	221.297	165.166	199.282
13.47	150.064	221.916	164.762	199.905
13.5	149.631	222.381	164.342	200.527
13.53	149.213	222.69	163.937	201.305
13.57	148.764	223	163.533	201.927
13.6	148.315	223.154	163.128	202.549
13.63	147.898	223.154	162.724	203.016
13.67	147.48	223.309	162.288	203.327
13.7	147.016	223.309	161.868	203.483
13.73	146.598	223.464	161.448	203.794
13.77	146.118	223.464	161.059	203.794
13.8	145.654	223.464	160.639	203.949
13.83	145.22	223.464	160.235	203.949
13.87	144.787	223.309	159.846	203.949
13.9	144.354	223.309	159.441	204.105
13.93	143.921	223.309	159.006	204.105
13.97	143.456	223.309	158.601	204.261
14	143.023	223.309	158.213	204.261
14.03	142.574	223.309	157.808	204.416
14.07	142.11	223.309	157.404	204.416
14.1	141.661	223.309	156.999	204.416
14.13	141.212	223.309	156.579	204.416
14.17	140.779	223.154	156.143	204.416
14.2	140.346	223	155.723	204.572
14.23	139.881	223	155.319	204.572
14.27	139.417	223	154.914	204.727
14.3	138.999	222.845	154.51	204.727
14.33	138.566	222.69	154.121	204.727
14.37	138.117	222.69	153.717	204.727
14.4	137.653	222.535	153.312	204.572
14.43	137.189	222.535	152.861	204.572
14.47	136.756	222.535	152.472	204.572
14.5	136.338	222.535	152.067	204.727
14.53	135.858	222.535	151.663	204.727
14.57	135.44	222.535	151.274	204.727
14.6	134.991	222.535	150.885	204.572
14.63	134.558	222.535	150.481	204.572
14.67	134.125	222.381	150.045	204.416
14.7	133.676	222.226	149.625	204.416
14.73	133.243	222.226	149.221	204.261
14.77	132.809	222.226	148.832	204.261
14.8	132.345	222.226	148.443	204.105
14.83	131.881	222.381	148.069	203.949
14.87	131.432	222.381	147.68	203.794
14.9	130.983	222.381	147.276	203.638
14.93	130.55	222.535	146.84	203.483
14.97	130.132	222.381	146.42	203.327
15	129.683	222.381	146.016	203.172
15.03	129.25	222.226	145.612	203.172
15.07	128.786	222.226	145.207	203.172
15.1	128.321	222.226	144.818	203.016
15.13	127.888	222.226	144.429	203.016
15.17	127.455	222.226	144.025	202.86
15.2	127.037	222.226	143.589	202.705
15.23	126.604	222.071	143.185	202.705
15.27	126.201	221.916	142.796	202.549
15.3	125.768	221.607	142.407	202.549
15.33	125.381	221.297	142.018	202.394
15.37	124.963	220.988	141.613	202.238
15.4	124.576	220.678	141.24	201.927
15.43	124.189	220.214	140.851	201.771
15.47	123.772	219.75	140.447	201.46
15.5	123.385	219.131	140.073	201.305
15.53	123.029	218.357	139.715	200.994
15.57	122.688	217.583	139.373	200.683
15.6	122.332	216.655	139.031	200.216
15.63	121.992	215.726	138.689	199.749
15.67	121.667	214.488	138.362	198.971
15.7	121.327	213.095	138.051	198.193
15.73	120.94	211.702	137.724	197.416
15.77	120.599	210.464	137.366	196.482
15.8	120.243	208.917	137.055	195.549
15.83	119.887	207.524	136.728	194.46
15.87	119.547	205.977	136.417	193.371
15.9	119.237	204.274	136.106	192.126
15.93	118.897	202.572	135.795	190.726
15.97	118.541	200.715	135.5	189.326
16	118.185	199.013	135.188	187.926
16.03	117.876	197.156	134.893	186.37
16.07	117.504	195.453	134.582	184.815
16.1	117.133	193.596	134.255	183.259
16.13	116.808	191.894	133.959	181.703
16.17	116.467	190.192	133.664	179.992
16.2	116.142	188.489	133.353	178.125
16.23	115.786	186.942	133.057	176.414
16.27	115.446	185.394	132.746	174.703
16.3	115.106	183.847	132.435	172.991
16.33	114.765	182.299	132.139	171.436
16.37	114.425	180.907	131.844	169.725
16.4	114.084	179.514	131.533	168.169
16.43	113.697	178.43	131.19	166.613
16.47	113.341	177.502	130.895	165.213
16.5	113.001	176.728	130.615	163.657
16.53	112.676	175.8	130.319	162.413
16.57	112.335	175.181	130.024	161.013
16.6	112.01	174.407	129.712	159.924
16.63	111.67	173.788	129.432	158.679
16.67	111.345	173.324	129.137	157.59
16.7	111.02	172.859	128.857	156.657
16.73	110.68	172.395	128.546	155.723
16.77	110.339	172.086	128.203	154.946
16.8	109.983	171.931	127.908	154.479
16.83	109.643	171.776	127.628	153.857
16.87	109.318	171.621	127.332	153.39
16.9	108.977	171.467	127.037	152.923
16.93	108.637	171.312	126.757	152.457
16.97	108.296	171.157	126.477	152.145
17	107.956	171.002	126.181	151.679
17.03	107.615	170.848	125.885	151.368
17.07	107.275	170.848	125.59	150.901
17.1	106.904	170.693	125.279	150.745
17.13	106.579	170.693	124.968	150.59
17.17	106.207	170.693	124.672	150.279
17.2	105.867	170.848	124.392	150.123
17.23	105.542	170.693	124.112	149.967
17.27	105.201	170.693	123.832	149.656
17.3	104.845	170.693	123.552	149.501
17.33	104.505	170.693	123.272	149.19
17.37	104.149	170.693	122.976	148.878
17.4	103.824	170.538	122.681	148.567
17.43	103.499	170.693	122.401	148.412
17.47	103.159	170.538	122.074	148.101
17.5	102.818	170.538	121.794	147.945
17.53	102.416	170.693	121.514	147.789
17.57	102.075	170.693	121.234	147.478
17.6	101.75	170.693	120.938	147.167
17.63	101.41	170.848	120.658	147.012
17.67	101.054	170.848	120.378	146.7
17.7	100.713	170.848	120.098	146.545
17.73	100.358	171.002	119.834	146.234
17.77	100.017	171.157	119.554	145.923
17.8	99.6766	171.312	119.274	145.767
17.83	99.3052	171.467	118.947	145.612
17.87	98.9492	171.776	118.652	145.456
17.9	98.5778	171.931	118.371	145.145
17.93	98.2219	172.24	118.076	145.145
17.97	97.866	172.55	117.796	144.834
18	97.5719	172.55	117.516	144.678
18.03	97.2934	172.55	117.251	144.523
18.07	97.0148	172.395	116.971	144.211
18.1	96.6899	172.24	116.66	144.211
18.13	96.3339	172.086	116.365	144.056
18.17	95.9935	171.931	116.069	144.056
18.2	95.653	171.776	115.758	144.056
18.23	95.2816	171.621	115.478	143.9
18.27	94.8173	171.776	115.182	143.9
18.3	94.3995	172.086	114.902	143.9
18.33	93.9817	172.395	114.607	143.9
18.37	93.5948	172.705	114.327	143.745
18.4	93.2234	173.169	114.031	143.745
18.43	92.852	173.633	113.751	143.745
18.47	92.4806	174.097	113.471	143.9
18.5	92.0937	174.716	113.191	143.9
18.53	91.7223	175.335	112.864	143.9
18.57	91.3199	175.954	112.553	144.056
18.6	90.9485	176.573	112.273	144.211
18.63	90.5616	177.192	111.993	144.211
18.67	90.1902	177.811	111.713	144.211
18.7	89.8188	178.585	111.418	144.367
18.73	89.4474	179.204	111.122	144.367
18.77	89.0915	179.823	110.826	144.523
18.8	88.7046	180.288	110.546	144.523
18.83	88.3332	180.907	110.266	144.678
18.87	87.9618	181.526	109.971	144.834
18.9	87.5439	182.299	109.629	144.989
18.93	87.1725	182.918	109.333	145.145
18.97	86.7856	183.692	109.053	145.3
19	86.4142	184.311	108.773	145.456
19.03	86.0273	184.93	108.493	145.456
19.07	85.6405	185.549	108.197	145.456
19.1	85.2691	186.168	107.902	145.612
19.13	84.8822	186.787	107.606	145.612
19.17	84.5108	187.406	107.311	145.612
19.2	84.0929	188.025	107.031	145.767
19.23	83.6596	188.799	106.719	145.767
19.27	83.2882	189.573	106.408	145.923
19.3	82.9013	190.192	106.113	146.078
19.33	82.499	190.811	105.817	146.234
19.37	82.0966	191.275	105.522	146.234
19.4	81.7097	191.585	105.226	146.234
19.43	81.3538	191.739	104.93	146.389
19.47	81.0288	191.739	104.619	146.389
19.5	80.7038	191.585	104.339	146.545
19.53	80.3479	191.12	104.044	146.7
19.57	79.9455	190.811	103.748	146.856
19.6	79.5587	190.656	103.406	147.012
19.63	79.1254	190.656	103.11	147.167
19.67	78.6611	190.966	102.815	147.323
19.7	78.2278	191.275	102.519	147.478
19.73	77.81	191.585	102.224	147.634
19.77	77.4076	191.894	101.912	147.789
19.8	76.9898	192.358	101.617	147.945
19.83	76.5874	192.823	101.306	148.101
19.87	76.1541	193.287	101.026	148.256
19.9	75.7517	193.751	100.715	148.412
19.93	75.3494	194.215	100.372	148.723
19.97	74.947	194.834	100.061	148.878
20	74.5601	195.299	99.7656	149.19
20.03	74.1423	195.763	99.4701	149.345
20.07	73.7399	196.227	99.1589	149.501
20.1	73.3221	196.691	98.91	149.656
20.13	72.9197	197.156	98.6144	149.656
20.17	72.4555	197.775	98.3033	149.812
20.2	72.0531	198.239	98.0077	149.812
20.23	71.6508	198.703	97.6966	149.967
20.27	71.2484	199.322	97.3699	150.123
20.3	70.8306	199.786	97.0276	150.434
20.33	70.4127	200.251	96.7321	150.59
20.37	70.0104	200.715	96.4365	150.745
20.4	69.6235	201.179	96.1253	150.901
20.43	69.2057	201.643	95.8298	151.056
20.47	68.7414	202.108	95.5342	151.212
20.5	68.339	202.572	95.2231	151.212
20.53	67.9212	203.036	94.9119	151.368
20.57	67.5034	203.501	94.6008	151.523
20.6	67.0855	204.12	94.2585	151.679
20.63	66.6832	204.584	93.9318	151.834
20.67	66.2654	205.048	93.6207	152.145
20.7	65.863	205.512	93.3096	152.301
20.73	65.4452	205.977	92.9984	152.612
20.77	64.9964	206.441	92.6717	152.768
20.8	64.5785	206.75	92.3762	152.923
20.83	64.1762	206.905	92.065	153.234
20.87	63.7738	206.905	91.7539	153.39
20.9	63.356	206.905	91.4272	153.545
20.93	62.9382	206.75	91.0694	153.857
20.97	62.5049	206.75	90.7583	154.168
21	62.1025	206.75	90.4471	154.479
21.03	61.6382	207.06	90.1204	154.79
21.07	61.1894	207.215	89.8249	154.946
21.1	60.7561	207.524	89.5137	155.257
21.13	60.3538	207.834	89.2026	155.412
21.17	59.905	207.988	88.8914	155.723
21.2	59.4872	208.453	88.5648	155.879
21.23	59.0693	208.607	88.2381	156.035
21.27	58.636	208.917	87.8803	156.501
21.3	58.2182	209.226	87.5691	156.812
21.33	57.7694	209.536	87.2735	157.124
21.37	57.3206	209.845	86.9468	157.435
21.4	56.9028	210	86.6202	157.746
21.43	56.4849	210.31	86.2935	157.901
21.47	56.0671	210.464	85.9823	158.057
21.5	55.6183	210.774	85.6556	158.213
21.53	55.2005	211.083	85.3289	158.368
21.57	54.7672	211.393	84.9867	158.679
21.6	54.3339	211.702	84.6444	158.835
21.63	53.8696	212.012	84.3333	159.146
21.67	53.4518	212.321	84.0222	159.457
21.7	53.034	212.631	83.6955	159.613
21.73	52.6006	212.786	83.3688	159.768
21.77	52.1828	212.94	83.0421	160.079
21.8	51.7495	213.25	82.7154	160.235
21.83	51.3317	213.405	82.4043	160.235
21.87	50.9138	213.714	82.0776	160.39
21.9	50.4805	213.869	81.7198	160.546
21.93	50.0317	214.024	81.3931	160.702
21.97	49.7068	214.024	81.0819	160.857
22	49.5365	213.56	80.7708	161.013
22.03	49.2734	212.631	80.4597	161.168
22.07	48.9175	211.857	80.1952	161.168
22.1	48.4687	210.929	80.0085	161.013
22.13	47.9735	210.31	79.8218	160.39
22.17	47.4164	210	79.5729	159.768
22.2	46.8283	209.845	79.2618	159.146
22.23	46.1939	210.155	78.8262	158.679
22.27	45.6213	210.619	78.3751	158.679
22.3	45.0642	211.393	77.9084	158.835
22.33	44.4916	212.321	77.4261	159.301
22.37	43.9345	213.405	76.9127	160.235
22.4	43.3619	214.952	76.4149	161.168
22.43	42.7583	216.655	75.9015	162.568
22.47	42.2012	218.357	75.357	164.28
22.5	41.6441	220.369	74.8437	166.146
22.53	41.087	222.381	74.3303	168.324
22.57	40.5299	224.702	73.8325	170.658
22.6	39.9728	226.868	73.3036	173.303
22.63	39.4157	229.344	72.7902	176.103
22.67	38.8121	231.82	72.2457	179.059
22.7	38.255	234.606	71.7479	182.17
22.73	37.7134	237.237	71.2345	185.437
22.77	37.1408	240.022	70.7211	188.859
22.8	36.5837	242.653	70.2078	192.437
22.83	36.042	245.439	69.6788	196.015
22.87	35.4695	248.224	69.1343	199.749
22.9	34.8814	251.01	68.6365	203.483
22.93	34.3398	253.795	68.1387	207.216
22.97	33.7826	256.736	67.6253	211.106
23	33.2255	259.521	67.1275	214.839
23.03	32.6839	262.152	66.5986	218.573
23.07	32.1423	264.783	66.0696	222.306
23.1	31.5697	267.259	65.5563	225.885
23.13	31.0126	269.735	65.0585	229.463
23.17	30.4709	271.901	64.5451	232.885
23.2	29.9138	274.068	64.0473	236.308
23.23	29.3722	276.08	63.5339	239.574
23.27	28.846	277.937	62.9894	242.686
23.3	28.3044	279.484	62.4916	245.642
23.33	27.7163	280.258	61.9782	248.442
23.37	27.1747	280.568	61.4804	250.931
23.4	26.6485	280.568	60.967	253.109
23.43	26.1069	280.103	60.4692	254.665
23.47	25.5962	279.639	59.9247	255.909
23.5	25.07	279.02	59.4269	256.531
23.53	24.5439	278.401	58.9291	256.842
23.57	23.9713	277.937	58.4313	256.998
23.6	23.4142	277.473	57.9335	256.998
23.63	22.888	277.008	57.4356	256.842
23.67	22.3464	276.699	56.8911	256.687
23.7	21.8202	276.08	56.3933	256.687
23.73	21.2941	275.616	55.8955	256.376
23.77	20.7524	275.151	55.3977	256.22
23.8	20.1953	274.842	54.8999	256.065
23.83	19.6691	274.378	54.4021	255.754
23.87	19.1585	273.913	53.8731	255.598
23.9	18.6323	273.449	53.3598	255.442
23.93	18.1216	272.83	52.8619	255.287
23.97	17.5954	272.366	52.3797	254.976
24	17.0848	271.747	51.8663	254.82
24.03	16.5277	271.283	51.384	254.665
24.07	16.017	270.818	50.8396	254.509
24.1	15.5063	270.199	50.3417	254.353
24.13	15.0265	269.735	49.8439	254.042
24.17	14.5313	268.961	49.3928	253.887
24.2	14.0361	268.342	48.895	253.731
24.23	13.5564	267.568	48.3971	253.42
24.27	13.0457	266.795	47.8838	253.264
24.3	12.535	266.176	47.3548	252.953
24.33	12.0553	265.402	46.857	252.798
24.37	11.591	264.473	46.3748	252.642
24.4	11.1422	263.545	45.8769	252.331
24.43	10.678	262.616	45.3791	252.175
24.47	10.2292	261.533	44.8658	252.02
24.5	9.7804	260.45	44.3524	251.864
24.53	9.3161	259.212	43.8546	251.709
24.57	8.8828	257.974	43.3723	251.553
24.6	8.465	256.581	42.8745	251.398
24.63	8.0781	255.033	42.3767	251.242
24.67	7.6912	253.331	41.8633	251.086
24.7	7.3353	251.474	41.3344	251.086
24.73	6.9948	249.462	40.8521	250.931
24.77	6.6389	247.296	40.3543	250.775
24.8	6.3294	244.82	39.8565	250.775
24.83	6.0509	242.034	39.3587	250.775
24.87	5.7878	239.094	38.8608	250.62
24.9	5.5247	235.844	38.3319	250.62
24.93	5.308	232.285	37.8341	250.62
24.97	5.1223	228.416	37.3518	250.464
25	4.9521	224.392	36.8696	250.464
25.03	4.8283	219.75	36.3718	250.464
25.07	4.7045	214.952	35.8895	250.309
25.1	4.6116	209.691	35.3606	250.309
25.13	4.5497	204.12	34.8627	250.153
25.17	4.4724	198.239	34.3805	250.153
25.2	4.4414	191.894	33.8827	249.998
25.23	4.395	185.394	33.4004	249.998
25.27	4.364	178.585	32.9026	249.998
25.3	4.3176	171.467	32.3892	249.842
25.33	4.3176	164.193	31.8914	249.842
25.37	4.2867	156.765	31.3936	249.842
25.4	4.2867	149.182	30.9113	249.686
25.43	4.2557	141.599	30.4291	249.686
25.47	4.2557	133.862	29.9312	249.686
25.5	4.2557	126.124	29.4334	249.531
25.53	4.2557	118.231	28.9201	249.375
25.57	4.2557	110.494	28.4378	249.22
25.6	4.2402	102.756	27.9555	249.064
25.63	4.2402	95.328	27.4733	248.909
25.67	4.2248	87.8999	26.991	248.753
25.7	4.2248	80.7812	26.5088	248.597
25.73	4.2248	73.8173	25.9643	248.442
25.77	4.2248	67.0082	25.4976	248.286
25.8	4.2093	60.5085	25.0153	248.131
25.83	4.2093	54.3184	24.5175	247.975
25.87	4.2093	48.5925	24.0508	247.82
25.9	4.2093	43.0214	23.5685	247.508
25.93	4.1938	38.0693	23.0551	247.353
25.97	4.1938	33.272	22.5573	247.197
26	4.1938	28.9389	22.0751	247.042
26.03	4.1938	24.9153	21.6084	246.886
26.07	4.1783	21.356	21.1417	246.575
26.1	4.1783	18.2609	20.6594	246.419
26.13	4.1783	15.4753	20.1616	246.108
26.17	4.1783	12.9993	19.6638	245.953
26.2	4.1783	10.8327	19.1971	245.797
26.23	4.1783	8.9757	18.7304	245.486
26.27	4.1629	7.5829	18.2637	245.33
26.3	4.1629	6.3449	17.797	245.019
26.33	4.1629	5.2616	17.3458	244.708
26.37	4.1629	4.4878	16.848	244.242
26.4	4.1474	3.8688	16.3657	243.93
26.43	4.1474	3.4046	15.9146	243.619
26.47	4.1319	2.9403	15.4634	243.153
26.5	4.1319	2.7856	15.0123	242.841
26.53	4.1319	2.4761	14.5611	242.219
26.57	4.1319	2.3213	14.11	241.752
26.6	4.1319	2.1665	13.6277	241.286
26.63	4.1319	2.0118	13.1766	240.663
26.67	4.1319	1.857	12.741	240.197

## Sheet: 1 mg.ml primary data n=3
Time [min]	1A: O2 Concentration [nmol/ml]	1A: O2 Slope uncorr. [pmol/(s*ml)]	1B: O2 Concentration [nmol/ml]	1B: O2 Slope uncorr. [pmol/(s*ml)]	mitos	NADH	ADP	cyt c
0	144.973		143.06
0.03	162.831		146.716
0.07	186.973		162.755
0.1	207.818		184.892
0.13	223.03	-10055.1	204.945	-8097.3
0.17	233.012	-8820.94	219.942	-9432.08
0.2	239.233	-6485.71	230.054	-8482.33
0.23	242.947	-4323.03	236.556	-6421.84
0.27	245.176	-2711.28	240.617	-4397.9
0.3	246.476	-5678.83	243.137	-6295.36
0.33	247.249	-4330.46	244.677	-5538.99
0.37	247.729	-2970.49	245.611	-4314.21
0.4	248.008	-1908.26	246.233	-3041.51
0.43	248.224	-1176.9	246.575	-2010.25
0.47	248.394	-3226.14	246.777	-3859.95
0.5	248.549	-2382.58	246.902	-3199.72
0.53	248.642	-1610.21	246.98	-2407.26
0.57	248.704	-1030.19	247.042	-1665.51
0.6	248.75	-638.512	247.073	-1090.06
0.63	248.735	-2031.76	247.104	-2495.46
0.67	248.704	-1482.54	247.135	-2023.47
0.7	248.689	-996.147	247.151	-1502.16
0.73	248.704	-635.881	247.182	-1032.35
0.77	248.75	-394.157	247.213	-673.92
0.8	248.781	-1384.73	247.228	-1724.62
0.83	248.766	-1004.19	247.213	-1383.46
0.87	248.75	-673.022	247.213	-1020.37
0.9	248.72	-429.44	247.244	-699.122
0.93	248.689	-266.021	247.26	-455.969
0.97	248.673	-1000.48	247.275	-1257.61
1	248.689	-722.543	247.291	-1002.48
1.03	248.704	-482.985	247.322	-736.925
1.07	248.72	-307.804	247.353	-504.351
1.1	248.72	-190.656	247.368	-329.493
1.13	248.704	-755.351	247.384	-956.587
1.17	248.72	-544.113	247.399	-759.638
1.2	248.704	-363.361	247.415	-557.4
1.23	248.689	-231.356	247.431	-381.608
1.27	248.689	-143.147	247.446	-249.686
1.3	248.689	-589.92	247.446	-751.704
1.33	248.704	-424.179	247.415	-595.358
1.37	248.75	-282.889	247.384	-436.368
1.4	248.781	-180.133	247.353	-298.535
1.43	248.766	-111.732	247.353	-195.393
1.47	248.75	-68.7105	247.337	-124.921
1.5	248.735	-42.2476	247.322	-79.184
1.53	248.72	-26.4628	247.337	-50.5595
1.57	248.689	-16.7134	247.353	-32.6692
1.6	248.658	-10.8327	247.368	-21.6239
1.63	248.642	-6.9639	247.384	-14.9345
1.67	248.627	-4.3331	247.384	-10.7342
1.7	248.611	-2.4761	247.384	-8.0895
1.73	248.596	-1.0833	247.399	-6.5338
1.77	248.596	0	247.415	-5.4449
1.8	248.565	0.7738	247.415	-4.8226
1.83	248.518	1.3928	247.431	-4.3559
1.87	248.534	1.7023	247.431	-3.8892
1.9	248.534	2.0118	247.431	-3.5781
1.93	248.549	2.1665	247.431	-3.2669
1.97	248.549	2.3213	247.431	-2.9558
2	248.549	2.4761	247.415	-2.8002
2.03	248.596	2.6308	247.415	-2.4891
2.07	248.58	2.6308	247.431	-2.3335
2.1	248.549	2.7856	247.431	-2.1779
2.13	248.518	2.7856	247.446	-2.0224
2.17	248.487	2.9403	247.415	-1.7112
2.2	248.472	3.0951	247.399	-1.4001
2.23	248.456	3.2498	247.384	-1.2445
2.27	248.456	3.4046	247.399	-0.9334
2.3	248.456	3.7141	247.415	-0.7778
2.33	248.456	3.8688	247.431	-0.6223
2.37	248.503	3.8688	247.399	-0.4667
2.4	248.503	3.8688	247.384	-0.4667
2.43	248.487	4.0236	247.399	-0.3111
2.47	248.487	4.0236	247.415	-0.3111
2.5	248.503	3.8688	247.431	-0.4667
2.53	248.472	3.8688	247.431	-0.4667
2.57	248.425	4.0236	247.446	-0.6223
2.6	248.394	4.1783	247.431	-0.7778
2.63	248.363	4.3331	247.415	-0.7778
2.67	248.363	4.3331	247.384	-0.7778
2.7	248.394	4.3331	247.368	-0.7778
2.73	248.41	4.1783	247.368	-0.6223
2.77	248.379	4.0236	247.384	-0.4667
2.8	248.348	3.8688	247.368	-0.3111
2.83	248.302	3.8688	247.384	0
2.87	248.58	3.2498	247.368	0.1556
2.9	248.472	3.0951	247.368	0.3111
2.93	248.348	2.9403	247.384	0.4667
2.97	248.379	2.9403	247.384	0.4667
3	248.363	2.7856	247.384	0.6223
3.03	248.286	2.9403	247.368	0.6223
3.07	248.116	3.4046	247.384	0.7778
3.1	247.822	4.1783	247.384	0.7778
3.13	247.621	5.5711	247.384	0.7778
3.17	247.481	6.9639	247.384	0.7778
3.2	247.419	8.5114	247.415	0.6223
3.23	247.327	10.059	247.446	0.4667
3.27					0
3.27	247.172	11.7612	247.446	0.4667	500
3.3	247.048	13.6183	247.399	0.3111
3.33	246.971	15.3206	247.384	0.3111
3.37	246.924	17.0229	247.368	0.4667
3.4	246.832	18.7251	247.322	0.4667
3.43	246.677	20.5822	247.228	0.7778
3.47	246.522	22.594	247.088	1.2445
3.5	246.398	24.7605	246.98	1.8668
3.53	246.29	26.9271	246.855	2.8002
3.57	246.166	29.0936	246.715	3.8892
3.6	245.996	31.4149	246.559	5.2893
3.63	245.857	33.7362	246.419	6.6894
3.67	245.717	36.0575	246.279	8.2451
3.7	245.594	38.3788	246.171	10.1119
3.73	245.516	40.3906	246.046	11.9787
3.77	245.454	42.4024	245.922	13.8455
3.8	245.33	44.2594	245.766	16.0235
3.83	245.176	46.1165	245.657	18.0459
3.87	245.052	47.9735	245.533	20.2238
3.9	244.928	49.8306	245.393	22.4018
3.93	244.789	51.5328	245.237	24.7353
3.97	244.665	53.3899	245.066	27.2244
4	244.557	54.9374	244.926	29.869
4.03	244.464	56.3302	244.77	32.5137
4.07	244.263	57.723	244.584	35.1583
4.1	244.108	58.961	244.413	37.9585
4.13	243.984	60.199	244.257	40.7588
4.17	243.86	61.2823	244.148	43.4034
4.2	243.721	61.5918	244.039	46.0481
4.23	243.582	62.0561	243.93	48.5372
4.27	243.473	62.3656	243.79	50.8707
4.3	243.35	62.3656	243.65	53.2042
4.33	243.288	62.2108	243.51	55.5377
4.37	243.164	61.7466	243.401	57.5601
4.4	243.025	61.5918	243.261	59.4269
4.43	242.885	61.5918	243.137	61.2937
4.47	242.762	61.9013	242.997	62.8494
4.5	242.638	62.2108	242.888	64.4051
4.53	242.514	62.3656	242.748	65.494
4.57	242.405	62.3656	242.624	66.4275
4.6	242.282	62.5203	242.483	67.2053
4.63	242.158	62.6751	242.359	67.8276
4.67	242.05	62.8298	242.188	68.2943
4.7	241.957	62.6751	242.048	68.4498
4.73	241.848	62.3656	241.892	68.6054
4.77	241.694	62.2108	241.752	68.761
4.8	241.539	62.2108	241.612	68.761
4.83	241.4	62.2108	241.472	68.761
4.87	241.26	62.2108	241.301	68.9165
4.9	241.167	62.2108	241.146	68.9165
4.93	241.075	62.0561	241.006	69.0721
4.97	240.951	62.0561	240.897	69.0721
5	240.858	62.0561	240.757	69.2277
5.03	240.734	62.0561	240.648	69.2277
5.07	240.564	62.0561	240.539	69.0721
5.1	240.394	62.0561	240.415	68.9165
5.13	240.301	61.9013	240.259	68.761
5.17	240.193	61.7466	240.119	68.6054
5.2	240.069	61.7466	239.994	68.4498
5.23	239.991	61.5918	239.87	68.2943
5.27	239.868	61.4371	239.73	67.9831
5.3	239.79	61.1275	239.559	67.9831
5.33	239.713	60.818	239.419	67.9831
5.37	239.62	60.3538	239.31	67.8276
5.4	239.543	60.0443	239.185	67.8276
5.43	239.481	59.58	239.046	67.9831
5.47	239.372	59.1158	238.905	68.1387
5.5	239.233	58.8062	238.781	68.1387
5.53	239.063	58.6515	238.641	68.1387
5.57	238.924	58.4967	238.517	68.1387
5.6	238.8	58.342	238.392	68.1387
5.63	238.645	58.342	238.283	67.9831
5.67	238.506	58.342	238.205	67.8276
5.7	238.367	58.1872	238.081	67.672
5.73	238.227	58.1872	237.941	67.3609
5.77	238.088	58.342	237.785	67.2053
5.8	237.949	58.4967	237.661	67.0497
5.83	237.902	58.4967	237.536	66.7386
5.87	237.794	58.4967	237.412	66.583
5.9	237.655	58.4967	237.288	66.2719
5.93	237.33	58.961	237.163	65.9608
5.97	236.773	60.0443	237.039	65.6496
6	236.262	61.9013	236.899	65.3385
6.03	235.828	64.2226	236.774	65.1829
6.07	235.426	66.8534	236.665	64.8718
6.1						0
6.1	235.101	69.7937	236.463	64.8718		500
6.13	234.854	72.734	236.183	65.0273
6.17	234.621	75.9839	235.701	65.8052
6.2	234.389	79.0789	235.187	67.3609
6.23	234.173	82.174	234.721	69.5388
6.27	233.956	85.2691	234.316	72.1835
6.3	233.693	88.3641	233.943	74.9837
6.33	233.43	91.3044	233.616	77.9395
6.37	233.229	94.3995	233.274	81.2064
6.4	233.043	97.1851	232.994	84.3178
6.43	232.811	100.28	232.698	87.7402
6.47	232.517	103.22	232.403	91.1627
6.5	232.223	106.161	232.123	94.5852
6.53	231.991	109.101	231.843	98.0077
6.57	231.743	111.887	231.578	101.43
6.6	231.495	114.517	231.298	104.853
6.63	231.294	116.993	231.018	108.275
6.67	231.109	119.005	230.754	111.698
6.7	230.907	120.862	230.458	115.12
6.73	230.66	122.565	230.178	118.387
6.77	230.397	123.957	229.883	121.654
6.8	230.118	125.195	229.618	124.765
6.83	229.886	126.279	229.338	127.721
6.87	229.7	127.052	229.058	130.677
6.9	229.453	127.826	228.762	133.477
6.93	229.143	128.445	228.482	136.122
6.97	228.849	128.91	228.202	138.611
7	228.601	129.374	227.938	140.633
7.03	228.447	129.219	227.689	142.5
7.07	228.261	128.91	227.409	144.211
7.1	228.029	128.291	227.098	145.767
7.13	227.735	127.671	226.833	147.012
7.17	227.41	126.588	226.553	147.945
7.2	227.116	125.35	226.273	148.723
7.23	226.806	123.957	226.009	149.034
7.27	226.481	122.719	225.744	149.19
7.3	226.218	122.1	225.495	148.723
7.33	226.002	121.791	225.2	148.256
7.37	225.8	121.791	224.935	147.167
7.4	225.537	122.1	224.655	145.923
7.43	225.29	122.565	224.391	144.211
7.47	225.042	122.874	224.064	142.656
7.5	224.795	123.338	223.784	141.411
7.53	224.547	123.648	223.504	140.478
7.57	224.33	123.957	223.224	139.856
7.6	224.114	124.112	222.96	139.389
7.63	223.897	124.267	222.695	139.078
7.67	223.649	124.422	222.431	138.922
7.7	223.417	124.576	222.166	138.767
7.73	223.185	124.576	221.886	138.611
7.77	222.907	124.422	221.606	138.455
7.8	222.628	124.576	221.326	138.455
7.83	222.365	124.886	220.984	138.455
7.87	222.117	125.041	220.704	138.611
7.9	221.823	125.35	220.44	138.611
7.93	221.607	125.66	220.16	138.611
7.97	221.452	125.505	219.895	138.611
8	221.313	125.195	219.615	138.611
8.03	221.127	124.731	219.351	138.611
8.07	220.864	124.267	219.086	138.611
8.1	220.585	123.803	218.822	138.611
8.13	220.338	123.493	218.542	138.611
8.17	220.106	123.184	218.293	138.455
8.2	219.874	122.719	217.997	138.455
8.23	219.719	122.1	217.717	138.455
8.27	219.502	121.481	217.437	138.455
8.3	219.285	120.862	217.126	138.611
8.33	219.053	120.398	216.846	138.611
8.37	218.775	119.779	216.582	138.611
8.4	218.481	119.16	216.302	138.611
8.43	218.202	118.541	216.037	138.767
8.47	217.954	118.077	215.788	138.611
8.5	217.722	117.767	215.508	138.611
8.53	217.521	117.458	215.259	138.611
8.57	217.289	117.148	214.979	138.611
8.6	217.042	117.148	214.684	138.455
8.63	216.825	117.148	214.404	138.455
8.67	216.639	116.993	214.139	138.3
8.7	216.423	116.839	213.875	138.144
8.73	216.113	116.839	213.61	137.989
8.77	215.834	116.839	213.33	137.833
8.8	215.602	116.993	213.05	137.833
8.83	215.386	116.993	212.77	137.833
8.87	215.2	116.993	212.506	137.678
8.9	214.952	116.993	212.241	137.678
8.93	214.705	116.993	211.961	137.522
8.97	214.473	116.993	211.666	137.522
9	214.24	116.839	211.401	137.366
9.03	214.008	116.839	211.121	137.366
9.07	213.761	116.839	210.826	137.211
9.1	213.467	116.993	210.514	137.211
9.13	213.204	117.148	210.25	137.211
9.17	212.971	117.612	209.97	137.366
9.2	212.739	117.922	209.705	137.366
9.23	212.492	118.386	209.441	137.522
9.27	212.213	119.005	209.177	137.522
9.3	211.966	119.315	208.897	137.678
9.33	211.702	119.624	208.57	137.833
9.37	211.47	119.779	208.305	137.833
9.4	211.238	119.934	208.056	137.833
9.43	211.053	120.088	207.776	137.989
9.47	210.805	120.243	207.496	137.989
9.5	210.526	120.553	207.216	137.989
9.53	210.279	120.708	206.936	137.989
9.57	210.016	120.862	206.656	137.989
9.6	209.768	120.862	206.392	137.989
9.63	209.551	120.862	206.127	138.144
9.67	209.335	120.862	205.863	138.144
9.7	209.118	120.708	205.552	138.3
9.73	208.855	120.862	205.303	138.3
9.77	208.592	121.017	205.023	138.455
9.8	208.344	121.172	204.743	138.455
9.83	208.159	121.327	204.478	138.455
9.87	208.004	121.172	204.214	138.455
9.9							0
9.9	207.741	121.172	203.949	138.3			500
9.93	207.462	121.017	203.685	138.3
9.97	207.106	121.327	203.467	138.144
10	206.719	121.636	203.28	137.833
10.03	206.379	121.946	203.063	137.366
10.07	206.008	122.719	202.767	136.9
10.1	205.621	123.803	202.394	136.744
10.13	205.234	125.041	202.036	136.589
10.17	204.847	126.433	201.631	136.9
10.2	204.476	127.981	201.196	137.366
10.23	204.15	129.374	200.76	137.989
10.27	203.795	131.076	200.34	138.922
10.3	203.408	132.778	199.889	140.167
10.33	202.944	134.79	199.438	141.722
10.37	202.495	137.111	198.987	143.434
10.4	202.061	139.433	198.551	145.3
10.43	201.597	142.218	198.1	147.634
10.47	201.179	145.159	197.68	149.967
10.5	200.777	148.099	197.229	152.457
10.53	200.375	151.039	196.778	155.101
10.57	200.003	153.98	196.28	157.901
10.6	199.57	157.075	195.798	160.857
10.63	199.152	160.324	195.346	163.969
10.67	198.781	163.419	194.88	167.391
10.7	198.394	166.514	194.429	170.814
10.73	197.945	169.764	193.977	174.08
10.77	197.481	172.859	193.542	177.503
10.8	197.063	175.954	193.06	181.081
10.83	196.661	179.049	192.608	184.503
10.87	196.258	181.99	192.142	188.082
10.9	195.856	184.93	191.675	191.504
10.93	195.407	187.716	191.224	194.927
10.97	195.005	190.346	190.773	198.349
11	194.571	192.977	190.291	201.616
11.03	194.169	195.144	189.808	205.038
11.07	193.798	197.31	189.357	208.15
11.1	193.38	199.167	188.906	211.106
11.13	192.962	200.87	188.47	214.061
11.17	192.544	202.417	188.004	216.706
11.2	192.126	203.346	187.537	219.195
11.23	191.724	204.12	187.024	221.529
11.27	191.337	204.584	186.541	223.707
11.3	190.95	205.048	186.075	225.573
11.33	190.501	205.512	185.608	227.129
11.37	190.099	205.822	185.172	228.062
11.4	189.712	205.977	184.721	228.685
11.43	189.294	206.131	184.286	229.307
11.47	188.876	206.286	183.772	229.774
11.5	188.458	206.441	183.306	230.085
11.53	187.994	206.596	182.854	230.396
11.57	187.561	206.596	182.419	230.707
11.6	187.112	206.596	181.968	230.863
11.63	186.694	206.596	181.501	230.863
11.67	186.292	206.596	181.003	231.174
11.7	185.874	206.596	180.505	231.329
11.73	185.456	206.75	180.07	231.485
11.77	185.023	206.905	179.619	231.641
11.8	184.574	207.215	179.167	231.641
11.83	184.125	207.524	178.701	231.641
11.87	183.677	207.834	178.234	231.641
11.9	183.243	208.143	177.736	231.641
11.93	182.841	208.453	177.285	231.796
11.97	182.439	208.762	176.85	231.796
12	182.005	208.917	176.383	231.952
12.03	181.603	209.072	175.916	231.952
12.07	181.185	209.226	175.449	231.952
12.1	180.752	209.381	174.983	231.952
12.13	180.319	209.691	174.5	231.952
12.17	179.916	210	174.049	231.952
12.2	179.545	210.155	173.598	231.952
12.23	179.111	210.31	173.147	231.952
12.27	178.694	210.464	172.696	231.796
12.3	178.276	210.619	172.245	231.796
12.33	177.843	210.774	171.778	231.641
12.37	177.44	210.929	171.265	231.641
12.4	176.976	211.083	170.814	231.641
12.43	176.573	211.083	170.347	231.641
12.47	176.156	211.238	169.896	231.641
12.5	175.738	211.393	169.445	231.485
12.53	175.351	211.393	168.993	231.329
12.57	174.933	211.393	168.527	231.329
12.6	174.515	211.238	168.06	231.329
12.63	174.097	211.083	167.609	231.329
12.67	173.695	210.929	167.158	231.329
12.7	173.231	210.929	166.691	231.329
12.73	172.828	210.619	166.24	231.174
12.77	172.457	210.31	165.789	231.018
12.8	172.07	210	165.291	231.018
12.83	171.652	209.691	164.84	231.018
12.87	171.219	209.381	164.388	231.018
12.9	170.786	209.226	163.922	230.863
12.93	170.368	209.072	163.471	230.707
12.97	169.965	208.762	163.019	230.707
13	169.517	208.607	162.568	230.552
13.03	169.114	208.453	162.071	230.552
13.07	168.712	208.298	161.635	230.552
13.1	168.294	207.988	161.184	230.396
13.13	167.907	207.834	160.733	230.396
13.17	167.536	207.679	160.266	230.24
13.2	167.133	207.369	159.799	230.24
13.23	166.762	207.215	159.317	230.24
13.27	166.375	206.905	158.835	230.24
13.3	165.911	206.75	158.384	230.24
13.33	165.571	206.441	157.932	230.24
13.37								0
13.37	165.308	205.822	157.481	230.24				500
13.4	165.044	205.048	157.015	230.24
13.43	164.704	204.12	156.579	230.085
13.47	164.317	203.346	156.221	229.929
13.5	163.899	202.417	155.848	229.618
13.53	163.481	201.643	155.475	229.151
13.57	163.048	200.87	155.07	228.529
13.6	162.646	200.251	154.634	227.907
13.63	162.228	199.632	154.183	227.285
13.67	161.795	199.167	153.717	226.662
13.7	161.361	198.703	153.219	226.351
13.73	160.897	198.394	152.69	226.04
13.77	160.448	198.394	152.208	225.885
13.8	160.015	198.239	151.725	225.729
13.83	159.566	198.394	151.227	225.729
13.87	159.148	198.394	150.745	225.729
13.9	158.746	198.548	150.247	225.885
13.93	158.266	198.703	149.719	226.196
13.97	157.802	199.167	149.236	226.351
14	157.369	199.477	148.754	226.662
14.03	156.935	200.096	148.287	227.129
14.07	156.502	200.715	147.821	227.44
14.1	156.069	201.334	147.323	227.751
14.13	155.651	201.798	146.809	228.374
14.17	155.233	202.417	146.296	228.996
14.2	154.784	203.191	145.814	229.618
14.23	154.32	203.965	145.331	230.24
14.27	153.902	204.739	144.834	231.018
14.3	153.453	205.667	144.32	231.641
14.33	153.02	206.75	143.791	232.574
14.37	152.556	207.834	143.278	233.507
14.4	152.107	208.917	142.78	234.441
14.43	151.689	210	142.282	235.53
14.47	151.256	211.238	141.8	236.463
14.5	150.807	212.321	141.302	237.397
14.53	150.343	213.405	140.789	238.486
14.57	149.925	214.488	140.275	239.574
14.6	149.476	215.571	139.793	240.663
14.63	149.027	216.655	139.311	241.752
14.67	148.563	217.738	138.813	242.841
14.7	148.114	218.512	138.315	243.93
14.73	147.712	218.976	137.817	245.019
14.77	147.263	219.285	137.289	246.108
14.8	146.83	219.44	136.791	247.042
14.83	146.397	219.595	136.293	247.82
14.87	145.948	219.75	135.811	248.131
14.9	145.499	219.904	135.313	248.442
14.93	145.05	220.059	134.815	248.753
14.97	144.617	220.059	134.286	248.909
15	144.184	220.059	133.804	248.909
15.03	143.75	220.059	133.322	249.064
15.07	143.271	220.059	132.839	249.064
15.1	142.853	220.214	132.357	249.064
15.13	142.419	220.214	131.859	249.22
15.17	141.986	220.369	131.315	249.22
15.2	141.537	220.369	130.817	249.375
15.23	141.058	220.369	130.335	249.375
15.27	140.609	220.523	129.837	249.531
15.3	140.207	220.523	129.339	249.531
15.33	139.742	220.678	128.857	249.531
15.37	139.309	220.833	128.359	249.531
15.4	138.876	220.833	127.846	249.375
15.43	138.442	220.833	127.363	249.375
15.47	138.024	220.833	126.881	249.22
15.5	137.622	220.678	126.399	249.064
15.53	137.204	220.523	125.885	249.064
15.57	136.786	220.369	125.372	248.909
15.6	136.369	220.059	124.843	248.909
15.63	135.889	219.904	124.361	248.753
15.67	135.456	219.75	123.863	248.753
15.7	134.991	219.595	123.381	248.753
15.73	134.542	219.595	122.883	248.753
15.77	134.109	219.44	122.385	248.753
15.8	133.676	219.285	121.856	248.753
15.83	133.227	219.285	121.358	248.753
15.87	132.809	219.131	120.861	248.753
15.9	132.345	219.131	120.378	248.909
15.93	131.881	218.976	119.896	248.909
15.97	131.447	218.976	119.414	248.753
16	130.999	219.131	118.885	248.753
16.03	130.596	219.131	118.403	248.753
16.07	130.163	218.976	117.92	248.597
16.1	129.73	218.976	117.438	248.597
16.13	129.312	218.821	116.956	248.597
16.17	128.848	218.821	116.474	248.442
16.2	128.368	218.821	115.945	248.442
16.23	127.934	218.821	115.447	248.442
16.27	127.501	218.976	114.965	248.286
16.3	127.083	218.821	114.482	248.286
16.33	126.635	218.821	113.984	248.286
16.37	126.201	218.821	113.502	248.131
16.4	125.752	218.976	112.989	248.131
16.43	125.35	218.976	112.46	247.975
16.47	124.901	218.976	111.978	247.975
16.5	124.453	218.976	111.495	247.975
16.53	124.019	218.976	111.013	247.82
16.57	123.57	218.976	110.531	247.82
16.6	123.106	219.285	110.033	247.664
16.63	122.673	219.285	109.504	247.664
16.67	122.24	219.44	109.006	247.664
16.7	121.806	219.595	108.524	247.664
16.73	121.404	219.595	108.042	247.508
16.77	120.971	219.75	107.56	247.508
16.8	120.568	219.595	107.077	247.353
16.83	120.197	219.44	106.564	247.197
16.87	119.81	218.976	106.082	247.042
16.9	119.423	218.512	105.63	246.886
16.93	119.052	217.893	105.179	246.731
16.97	118.68	217.274	104.744	246.419
17	118.293	216.5	104.293	246.108
17.03	117.906	215.881	103.873	245.642
17.07	117.52	215.107	103.39	245.019
17.1	117.133	214.179	102.955	244.553
17.13	116.761	213.25	102.535	243.93
17.17	116.374	212.476	102.115	243.308
17.2	115.988	211.393	101.71	242.375
17.23	115.601	210.464	101.29	241.597
17.27	115.214	209.536	100.87	240.508
17.3	114.842	208.453	100.435	239.574
17.33	114.44	207.524	99.999	238.486
17.37	114.053	206.596	99.5945	237.397
17.4	113.635	205.667	99.19	236.152
17.43	113.264	204.584	98.8322	234.752
17.47	112.892	203.501	98.4433	233.196
17.5	112.506	202.572	98.0233	231.641
17.53	112.088	201.643	97.6032	230.24
17.57	111.685	200.87	97.1365	228.84
17.6	111.314	199.941	96.7321	227.44
17.63	110.958	199.167	96.3276	225.885
17.67	110.602	198.239	95.9231	224.329
17.7	110.262	197.31	95.5186	222.929
17.73	109.844	196.537	95.1297	221.373
17.77	109.457	195.608	94.7252	219.973
17.8	109.086	194.834	94.2896	218.573
17.83	108.699	194.215	93.8696	217.173
17.87	108.343	193.596	93.4807	215.928
17.9	107.987	192.977	93.0762	214.528
17.93	107.6	192.513	92.6717	213.284
17.97	107.244	192.049	92.2673	212.195
18	106.888	191.585	91.8628	211.106
18.03	106.517	191.275	91.4583	210.172
18.07	106.099	190.966	91.0072	209.239
18.1	105.712	190.811	90.6027	208.461
18.13	105.325	190.811	90.1982	207.839
18.17	104.969	190.656	89.7937	207.216
18.2	104.613	190.346	89.4048	206.75
18.23	104.242	190.192	89.0003	206.283
18.27	103.886	190.037	88.5959	205.972
18.3	103.53	189.727	88.1758	205.505
18.33	103.174	189.263	87.7558	205.35
18.37	102.818	188.954	87.3358	205.038
18.4	102.4	188.644	86.9313	204.883
18.43	102.029	188.489	86.5268	204.883
18.47	101.657	188.18	86.1379	204.727
18.5	101.286	187.87	85.7334	204.572
18.53	100.93	187.561	85.3289	204.572
18.57	100.543	187.406	84.9089	204.416
18.6	100.172	187.097	84.5044	204.416
18.63	99.8313	186.787	84.1	204.261
18.67	99.4754	186.478	83.711	204.261
18.7	99.104	186.168	83.3066	204.261
18.73	98.7171	186.013	82.9176	204.261
18.77	98.3612	185.859	82.5132	204.105
18.8	98.0053	185.549	82.1087	203.794
18.83	97.6338	185.394	81.6575	203.794
18.87	97.2624	185.24	81.2686	203.638
18.9	96.922	185.085	80.8641	203.638
18.93	96.566	184.93	80.4752	203.483
18.97	96.1946	184.775	80.0708	203.483
19	95.8387	184.621	79.6663	203.483
19.03	95.4673	184.311	79.2462	203.327
19.07	95.0649	184.311	78.8262	203.327
19.1	94.6781	184.156	78.4062	203.327
19.13	94.3067	184.156	77.9861	203.327
19.17	93.9507	184.156	77.5817	203.327
19.2	93.5948	184.156	77.1927	203.327
19.23	93.2234	184.002	76.7883	203.327
19.27	92.8674	183.847	76.3838	203.327
19.3	92.496	183.847	75.9793	203.327
19.33	92.1092	183.692	75.5282	203.327
19.37	91.7377	183.692	75.1393	203.327
19.4	91.3199	183.692	74.7348	203.327
19.43	90.933	183.847	74.3303	203.327
19.47	90.5616	184.156	73.9258	203.483
19.5	90.1902	184.311	73.5369	203.483
19.53	89.8343	184.466	73.1324	203.483
19.57	89.4783	184.466	72.6968	203.483
19.6	89.1379	184.466	72.2612	203.483
19.63	88.7665	184.466	71.8568	203.638
19.67	88.4106	184.466	71.4523	203.638
19.7	88.0391	184.466	71.0478	203.794
19.73	87.6523	184.466	70.6278	203.949
19.77	87.2499	184.621	70.2233	204.105
19.8	86.894	184.775	69.8033	204.105
19.83	86.5226	184.93	69.3521	204.416
19.87	86.1202	185.085	68.9632	204.416
19.9	85.7643	185.24	68.5587	204.572
19.93	85.3929	185.394	68.1387	204.727
19.97	85.0215	185.394	67.7342	204.883
20	84.65	185.549	67.3142	205.038
20.03	84.2632	185.704	66.9097	205.194
20.07	83.8453	185.859	66.4586	205.35
20.1	83.4584	186.168	66.023	205.505
20.13	83.087	186.323	65.6185	205.661
20.17	82.7156	186.478	65.214	205.816
20.2	82.3442	186.632	64.794	205.972
20.23	81.9728	186.787	64.374	206.127
20.27	81.5859	186.942	63.9539	206.283
20.3	81.2145	187.097	63.5339	206.439
20.33	80.8431	187.097	63.0672	206.594
20.37	80.4872	187.097	62.6627	206.905
20.4	80.0539	187.251	62.2271	207.061
20.43	79.6825	187.561	61.8071	207.372
20.47	79.2956	187.716	61.3871	207.683
20.5	78.8932	187.87	60.967	207.994
20.53	78.5218	188.025	60.547	208.15
20.57	78.1349	188.335	60.0803	208.461
20.6	77.7635	188.335	59.6603	208.772
20.63	77.3921	188.489	59.2402	209.083
20.67	77.0052	188.644	58.8046	209.394
20.7	76.6029	188.799	58.3846	209.705
20.73	76.1696	189.108	57.949	210.017
20.77	75.7982	189.573	57.529	210.328
20.8	75.4268	189.882	57.0623	210.639
20.83	75.0553	190.192	56.6267	210.95
20.87	74.6685	190.501	56.2066	211.261
20.9	74.2816	190.656	55.7711	211.572
20.93	73.8792	190.811	55.3355	211.883
20.97	73.4923	191.12	54.8999	212.195
21	73.1055	191.275	54.4643	212.506
21.03	72.6876	191.43	53.9976	212.972
21.07	72.2853	191.739	53.562	213.284
21.1	71.9139	191.894	53.1264	213.595
21.13	71.527	192.204	52.7064	213.906
21.17	71.1401	192.358	52.2708	214.372
21.2	70.7532	192.513	51.8352	214.684
21.23	70.3508	192.823	51.3996	214.995
21.27	69.964	192.977	50.9173	215.306
21.3	69.5926	192.977	50.4818	215.617
21.33	69.2057	193.132	50.0462	215.928
21.37	68.7569	193.442	49.6106	216.239
21.4	68.3545	193.596	49.2061	216.55
21.43	67.9522	194.061	48.7705	216.706
21.47	67.5498	194.37	48.3349	217.017
21.5	67.1629	194.68	47.8527	217.173
21.53	66.776	194.834	47.4015	217.484
21.57	66.4046	194.989	46.9504	217.795
21.6	66.0178	195.144	46.5148	217.951
21.63	65.6154	195.453	46.0636	218.262
21.67	65.1821	195.608	45.628	218.573
21.7	64.7642	195.763	45.1924	218.728
21.73	64.3619	196.072	44.7102	219.04
21.77	63.9595	196.382	44.2435	219.351
21.8	63.5572	196.537	43.7923	219.662
21.83	63.1703	196.846	43.3567	219.973
21.87	62.7834	197.156	42.9212	220.284
21.9	62.4429	197.156	42.47	220.44
21.93	62.2418	196.846	42.0344	220.751
21.97	62.0406	196.227	41.5366	221.062
22	61.7001	195.453	41.101	221.373
22.03	61.2513	194.989	40.6965	221.529
22.07	60.7716	194.68	40.3854	221.373
22.1	60.2609	194.525	40.1054	221.062
22.13	59.7502	194.68	39.7476	220.44
22.17	59.2241	194.989	39.3275	219.973
22.2	58.6979	195.453	38.8142	219.662
22.23	58.1563	196.227	38.2386	219.506
22.27	57.5837	197.31	37.6785	219.506
22.3	57.0266	198.548	37.0874	219.973
22.33	56.4849	200.096	36.4962	220.595
22.37	55.9433	201.798	35.9051	221.373
22.4	55.4017	203.81	35.2672	222.618
22.43	54.86	205.822	34.6605	224.018
22.47	54.3184	207.988	34.0694	225.573
22.5	53.7303	210.31	33.4626	227.44
22.53	53.2042	212.786	32.8559	229.463
22.57	52.6471	215.417	32.2181	231.641
22.6	52.1054	218.047	31.6114	233.974
22.63	51.5638	220.833	31.0202	236.619
22.67	51.0376	223.619	30.4291	239.263
22.7	50.496	226.404	29.8223	241.908
22.73	49.9389	229.344	29.2001	244.708
22.77	49.3972	232.439	28.5934	247.664
22.8	48.8711	235.38	28.0022	250.464
22.83	48.3295	238.32	27.411	253.576
22.87	47.8033	241.26	26.8199	256.531
22.9	47.2617	244.046	26.1976	259.643
22.93	46.72	246.832	25.6065	262.754
22.97	46.1629	249.617	25.0153	265.71
23	45.6367	252.248	24.4241	268.821
23.03	45.1106	255.033	23.8485	271.621
23.07	44.5689	257.51	23.2263	274.733
23.1	44.0428	259.986	22.6351	277.688
23.13	43.5166	262.307	22.044	280.489
23.17	42.975	264.473	21.4684	283.133
23.2	42.4024	266.64	20.8772	285.778
23.23	41.8762	268.342	20.286	288.267
23.27	41.3501	269.58	19.6949	290.445
23.3	40.8239	270.199	19.1193	292.779
23.33	40.2823	270.354	18.5437	294.645
23.37	39.7561	270.509	17.9681	296.357
23.4	39.199	270.509	17.408	297.601
23.43	38.6419	270.509	16.7858	298.379
23.47	38.1157	270.354	16.2257	298.535
23.5	37.605	270.199	15.6812	298.535
23.53	37.0634	269.89	15.1212	298.068
23.57	36.5373	269.58	14.5767	297.601
23.6	36.0111	269.425	14.0167	296.979
23.63	35.4385	269.271	13.4411	296.357
23.67	34.8659	269.271	12.9121	295.579
23.7	34.3398	269.116	12.3832	294.801
23.73	33.7981	269.116	11.8543	293.868
23.77	33.2874	268.961	11.3409	292.934
23.8	32.7767	268.807	10.812	292.001
23.83	32.2506	268.652	10.2986	290.912
23.87	31.7244	268.497	9.8319	289.512
23.9	31.1673	268.497	9.3652	288.267
23.93	30.6876	268.342	8.914	286.712
23.97	30.1924	268.187	8.4784	285
24	29.6972	267.878	8.074	283.133
24.03	29.2019	267.414	7.6384	281.111
24.07	28.6913	267.104	7.265	278.777
24.1	28.1651	266.795	6.9228	276.288
24.13	27.608	266.485	6.6116	273.488
24.17	27.0973	266.176	6.3472	270.221
24.2	26.6021	265.711	6.0827	266.643
24.23	26.0914	265.247	5.8493	262.599

## Sheet: 2 mg.ml primary data n=1
Time [min]	1A: O2 Concentration [nmol/ml]	1A: O2 Slope uncorr. [pmol/(s*ml)]	1B: O2 Concentration [nmol/ml]	1B: O2 Slope uncorr. [pmol/(s*ml)]	mitos	NADH	ADP	cyt c
0	176.46		177.841
0.03	186.54		179.003
0.07	206.792		191.967
0.1	226.125		210.511
0.13	240.647	-8397.9	227.327	-6524
0.17	250.237	-8062.41	239.787	-7846.38
0.2	256.119	-6138.34	248.103	-7077.41
0.23	259.612	-4122.36	253.393	-5326.98
0.27	261.665	-2570.54	256.68	-3615.53
0.3	262.875	-5052.38	258.697	-5163.1
0.33	263.595	-4019.87	259.936	-4584.46
0.37	264.024	-2806.91	260.7	-3567.83
0.4	264.269	-1806.27	261.174	-2501.21
0.43	264.391	-1104.81	261.464	-1641.13
0.47	264.483	-2896.22	261.679	-3165.46
0.5	264.529	-2209.77	261.801	-2642.32
0.53	264.529	-1510	261.893	-1987.09
0.57	264.529	-960.198	261.938	-1369.62
0.6	264.56	-583.962	261.984	-892.645
0.63	264.575	-1821.74	262.015	-2048.7
0.67	264.56	-1367.23	261.984	-1671.4
0.7	264.499	-925.73	261.984	-1240.13
0.73	264.453	-585.188	262.015	-848.923
0.77	264.422	-353.564	262.03	-551.731
0.8	264.361	-1238.09	262.076	-1415.79
0.83	264.3	-919.909	262.091	-1142.45
0.87	264.254	-618.124	262.091	-842.349
0.9	264.223	-387.572	262.061	-574.968
0.93	264.208	-231.471	262.03	-373.324
0.97	264.208	-890.19	262.03	-1032.22
1	264.146	-656.881	262.015	-826.909
1.03	264.1	-438.738	262.015	-607.072
1.07	264.039	-272.832	262.015	-413.378
1.1	263.917	-160.544	262.015	-267.992
1.13	263.886	-667.604	262.03	-783.645
1.17	263.855	-489.444	262.03	-624.959
1.2	263.825	-324.304	262.015	-457.559
1.23	263.748	-199.301	262.015	-310.951
1.27	263.702	-114.893	262	-201.491
1.3	263.687	-516.865	261.969	-614.41
1.33	263.671	-376.849	261.954	-488.287
1.37	263.625	-247.709	261.938	-356.508
1.4	263.549	-150.28	261.923	-241.851
1.43	263.518	-84.7143	261.923	-156.24
1.47	263.442	-43.3529	261.908	-98.1467
1.5	263.396	-18.0765	261.893	-60.6919
1.53	263.38	-3.0638	261.847	-37.149
1.57	263.334	6.1276	261.816	-22.32
1.6	263.304	11.6425	261.801	-13.1474
1.63	263.258	15.1659	261.801	-7.1852
1.67	263.243	17.4637	261.816	-3.5162
1.7	263.227	18.8424	261.801	-1.0701
1.73	263.181	19.7616	261.755	0.7644
1.77	263.151	20.3743	261.74	1.9874
1.8	263.105	20.6807	261.709	2.9047
1.83	263.074	20.9871	261.694	3.669
1.87	263.043	21.1403	261.679	4.2805
1.9	263.013	21.2935	261.679	4.7392
1.93	262.982	21.1403	261.663	5.0449
1.97	262.936	20.9871	261.633	5.3507
2	262.921	20.8339	261.602	5.8093
2.03	262.86	20.6807	261.587	6.2679
2.07	262.814	20.5275	261.556	6.5737
2.1	262.752	20.3743	261.541	7.0323
2.13	262.691	20.3743	261.51	7.1852
2.17	262.63	20.3743	261.48	7.4909
2.2	262.614	20.2211	261.449	7.6438
2.23	262.599	20.2211	261.434	7.9496
2.27	262.568	20.068	261.419	8.2553
2.3	262.553	19.7616	261.419	8.4082
2.33	262.538	19.4552	261.388	8.714
2.37	262.507	19.1488	261.373	9.0197
2.4	262.477	18.8424	261.358	9.1726
2.43	262.492	18.6892	261.327	9.3255
2.47	262.492	18.3829	261.312	9.4783
2.5	262.446	18.0765	261.296	9.4783
2.53	262.4	17.7701	261.296	9.6312
2.57	262.385	17.6169	261.281	9.6312
2.6	262.339	17.4637	261.235	9.6312
2.63	262.308	17.1573	261.235	9.6312
2.67	262.277	16.851	261.205	9.6312
2.7	262.247	16.6978	261.189	9.7841
2.73	262.231	16.3914	261.174	9.7841
2.77	262.216	16.2382	261.159	9.7841
2.8	262.17	16.085	261.144	9.6312
2.83	262.124	15.9318	261.128	9.6312
2.87	262.155	15.7786	261.098	9.6312
2.9	262.185	15.4722	261.082	9.7841
2.93	262.155	15.1659	261.067	9.7841
2.97	262.109	14.8595	261.067	9.7841
3	262.048	14.7063	261.052	9.6312
3.03	262.002	14.5531	261.021	9.4783
3.07	261.971	14.3999	261.006	9.4783
3.1	261.971	14.0935	260.991	9.3255
3.13	261.94	13.9403	260.96	9.3255
3.17	261.894	13.7871	260.945	9.3255
3.2	261.849	13.634	260.93	9.3255
3.23	261.818	13.4808	260.914	9.1726
3.27	261.772	13.3276	260.899	9.1726
3.3	261.772	13.3276	260.868	9.0197
3.33	261.787	13.0212	260.838	9.0197
3.37	261.772	12.868	260.822	9.0197
3.4	261.757	12.7148	260.807	9.0197
3.43	261.741	12.5616	260.822	8.8668
3.47	261.741	12.4084	260.822	8.8668
3.5	261.726	12.4084	260.807	8.714
3.53	261.695	12.4084	260.807	8.714
3.57	261.68	12.2552	260.792	8.5611
3.6	261.665	12.2552	260.746	8.5611
3.63	261.68	12.102	260.761	8.4082
3.67	261.649	11.9489	260.746	8.4082
3.7	261.588	11.7957	260.7	8.2553
3.73	261.542	11.7957	260.654	8.2553
3.77	261.512	11.7957	260.624	8.4082
3.8	261.496	11.6425	260.608	8.4082
3.83	261.481	11.4893	260.593	8.4082
3.87	261.481	11.3361	260.593	8.4082
3.9	261.466	11.1829	260.593	8.4082
3.93	261.466	11.0297	260.578	8.4082
3.97	261.435	11.0297	260.563	8.2553
4	261.42	10.8765	260.578	8.2553
4.03	261.389	10.8765	260.593	8.1025
4.07	261.358	10.7233	260.578	7.9496
4.1	261.343	10.7233	260.547	7.9496
4.13	261.374	10.5701	260.532	7.7967
4.17	261.358	10.417	260.501	7.7967
4.2	261.343	10.2638	260.486	7.6438
4.23	261.343	9.9574	260.486	7.6438
4.27	261.328	9.4978	260.486	7.4909
4.3	261.297	9.3446	260.471	7.3381
4.33	261.266	9.1914	260.44	7.3381
4.37	261.282	9.0382	260.425	7.1852
4.4	261.297	8.7319	260.44	7.0323
4.43	261.251	8.5787	260.425	7.0323
4.47	261.22	8.4255	260.41	6.8794
4.5	261.174	8.4255	260.379	6.8794
4.53	261.159	8.4255	260.364	6.7266
4.57	261.144	8.4255	260.349	6.7266
4.6	261.113	8.5787	260.349	6.7266
4.63	261.067	8.7319	260.333	6.7266
4.67	261.037	8.7319	260.318	6.7266
4.7	261.037	8.885	260.318	6.7266
4.73	261.052	8.885	260.303	6.7266
4.77	261.052	8.7319	260.303	6.5737
4.8	261.037	8.7319	260.303	6.4208
4.83	261.021	8.5787	260.287	6.2679
4.87	261.021	8.4255	260.257	6.2679
4.9	261.006	8.4255	260.257	6.1151
4.93	260.975	8.2723	260.257	5.9622
4.97	260.96	8.1191	260.226	5.8093
5	260.929	8.1191	260.18	5.8093
5.03	260.914	7.9659	260.18	5.8093
5.07	260.929	7.9659	260.18	5.8093
5.1	260.899	7.9659	260.15	5.9622
5.13	260.868	8.1191	260.135	5.9622
5.17	260.853	8.1191	260.119	6.1151
5.2	260.868	8.1191	260.119	6.2679
5.23	260.853	8.1191	260.119	6.2679
5.27	260.837	7.9659	260.135	6.2679
5.3	260.837	7.9659	260.119	6.2679
5.33	260.853	7.8127	260.104	6.2679
5.37	260.837	7.8127	260.089	6.1151
5.4	260.807	7.8127	260.089	5.9622
5.43	260.807	7.6595	260.073	5.9622
5.47	260.776	7.6595	260.073	5.8093
5.5	260.776	7.5063	260.073	5.8093
5.53	260.761	7.3531	260.058	5.8093
5.57	260.73	7.2	260.043	5.6564
5.6	260.7	7.2	260.027	5.6564
5.63	260.669	7.2	260.027	5.5036
5.67	260.684	7.0468	260.027	5.5036
5.7	260.669	7.0468	260.012	5.3507
5.73	260.654	6.7404	260.012	5.3507
5.77	260.654	6.5872	259.982	5.1978
5.8	260.669	6.434	259.982	5.1978
5.83	260.638	6.434	259.966	5.0449
5.87	260.577	6.434	259.936	5.0449
5.9	260.592	6.434	259.921	5.1978
5.93	260.638	6.2808	259.89	5.1978
5.97	260.638	6.1276	259.859	5.1978
6	260.608	6.1276	259.844	5.3507
6.03	260.592	6.1276	259.829	5.5036
6.07	260.531	6.2808	259.829	5.5036
6.1	260.516	6.2808	259.813	5.5036
6.13	260.531	6.1276	259.798	5.6564
6.17	260.577	5.9744	259.783	5.6564
6.2	260.592	5.8212	259.768	5.6564
6.23	260.546	5.668	259.783	5.6564
6.27	260.546	5.5149	259.783	5.6564
6.3	260.516	5.5149	259.783	5.6564
6.33	260.47	5.5149	259.783	5.6564
6.37	260.424	5.668	259.783	5.6564
6.4	260.439	5.668	259.768	5.6564
6.43	260.454	5.5149	259.752	5.6564
6.47	260.454	5.5149	259.752	5.6564
6.5	260.454	5.5149	259.768	5.6564
6.53	260.424	5.5149	259.768	5.6564
6.57	260.393	5.5149	259.768	5.5036
6.6	260.363	5.668	259.768	5.3507
6.63	260.317	5.668	259.783	5.1978
6.67	260.317	5.668	259.752	5.0449
6.7	260.301	5.8212	259.722	5.0449
6.73	260.271	5.8212	259.691	4.892
6.77	260.271	5.8212	259.676	4.892
6.8	260.301	5.8212	259.661	4.892
6.83	260.332	5.8212	259.63	4.892
6.87	260.332	5.668	259.63	4.7392
6.9	260.271	5.668	259.63	4.7392
6.93	260.255	5.668	259.615	4.7392
6.97	260.301	5.668	259.615	4.5863
7	260.301	5.668	259.615	4.5863
7.03	260.286	5.5149	259.63	4.4334
7.07	260.225	5.668	259.645	4.1277
7.1	260.194	5.668	259.615	4.1277
7.13	260.163	5.8212	259.584	3.9748
7.17	260.102	5.9744	259.554	3.8219
7.2	260.056	6.2808	259.554	3.8219
7.23	260.056	6.5872	259.569	3.8219
7.27	260.041	6.5872	259.569	3.669
7.3	260.026	6.7404	259.554	3.669
7.33	260.072	6.7404	259.538	3.8219
7.37	260.102	6.7404	259.538	3.8219
7.4	260.102	6.7404	259.538	3.8219
7.43	260.087	6.7404	259.538	3.8219
7.47	260.072	6.7404	259.538	3.8219
7.5	260.102	6.5872	259.523	3.9748
7.53	260.117	6.2808	259.538	3.9748
7.57	260.102	6.1276	259.523	3.9748
7.6	260.102	5.8212	259.523	3.9748
7.63	260.117	5.5149	259.492	3.9748
7.67	260.072	5.5149	259.462	3.9748
7.7	260.026	5.3617	259.462	3.9748
7.73	260.01	5.3617	259.462	3.9748
7.77	259.995	5.3617	259.462	3.9748
7.8	260.026	5.2085	259.462	3.9748
7.83	260.041	4.9021	259.447	3.9748
7.87	260.026	4.7489	259.431	3.9748
7.9	260.026	4.4425	259.431	3.8219
7.93	260.026	4.2893	259.416	3.669
7.97	260.041	4.2893	259.401	3.669
8	260.01	4.1361	259.37	3.5162
8.03	259.964	4.1361	259.385	3.5162
8.07	259.949	4.1361	259.401	3.5162
8.1	259.934	4.1361	259.385	3.5162
8.13	259.918	4.1361	259.401	3.5162
8.17	259.903	4.1361	259.401	3.5162
8.2	259.903	3.983	259.385	3.5162
8.23	259.888	3.983	259.37	3.5162
8.27	259.872	3.983	259.37	3.5162
8.3	259.842	3.8298	259.355	3.5162
8.33	259.842	3.8298	259.34	3.5162
8.37	259.826	3.6766	259.34	3.5162
8.4	259.811	3.6766	259.324	3.3633
8.43	259.811	3.6766	259.294	3.3633
8.47	259.796	3.8298	259.294	3.5162
8.5	259.765	3.983	259.278	3.5162
8.53	259.735	4.2893	259.278	3.669
8.57	259.735	4.5957	259.278	3.669
8.6	259.75	4.9021	259.294	3.669
8.63	259.75	5.2085	259.278	3.669
8.67	259.735	5.3617	259.248	3.669
8.7	259.719	5.5149	259.248	3.8219
8.73	259.75	5.5149	259.248	3.8219
8.77	259.735	5.5149	259.248	3.8219
8.8	259.719	5.668	259.248	3.669
8.83	259.719	5.668	259.248	3.669
8.87	259.735	5.5149	259.248	3.5162
8.9	259.719	5.3617	259.217	3.5162
8.93	259.688	5.3617	259.187	3.5162
8.97	259.658	5.2085	259.171	3.5162
9	259.642	5.2085	259.156	3.669
9.03	259.642	5.3617	259.141	3.8219
9.07	259.627	5.3617	259.141	3.8219
9.1	259.581	5.5149	259.141	3.8219
9.13	259.597	5.5149	259.156	3.8219
9.17	259.612	5.5149	259.125	3.8219
9.2	259.581	5.5149	259.125	3.9748
9.23	259.566	5.3617	259.125	3.9748
9.27	259.566	5.3617	259.095	3.9748
9.3	259.597	5.0553	259.095	4.1277
9.33	259.597	4.9021	259.095	4.1277
9.37	259.581	4.7489	259.11	4.1277
9.4	259.581	4.5957	259.095	4.1277
9.43	259.581	4.4425	259.095	4.1277
9.47	259.566	4.4425	259.08	4.1277
9.5	259.551	4.2893	259.08	3.9748
9.53	259.566	4.1361	259.08	3.9748
9.57	259.581	3.983	259.08	3.8219
9.6	259.551	3.8298	259.064	3.8219
9.63	259.535	3.8298	259.049	3.669
9.67	259.52	3.6766	259.049	3.669
9.7	259.52	3.6766	259.034	3.669
9.73	259.535	3.5234	259.019	3.669
9.77	259.551	3.3702	259.019	3.669
9.8	259.505	3.3702	258.988	3.669
9.83	259.474	3.3702	258.973	3.8219
9.87	259.443	3.5234	258.973	3.8219
9.9	259.413	3.6766	258.957	3.8219
9.93	259.397	3.8298	258.942	3.8219
9.97	259.382	3.8298	258.927	3.8219
10	259.382	3.983	258.911	3.9748
10.03	259.382	4.1361	258.911	3.9748
10.07	259.428	3.983	258.927	3.9748
10.1	259.443	3.8298	258.942	3.9748
10.13	259.397	3.8298	258.942	3.8219
10.17	259.382	3.8298	258.942	3.8219
10.2	259.351	3.8298	258.927	3.669
10.23	259.351	3.8298	258.927	3.5162
10.27	259.336	3.8298	258.927	3.5162
10.3	259.351	3.8298	258.911	3.5162
10.33	259.336	3.8298	258.881	3.5162
10.37	259.305	3.983	258.896	3.5162
10.4	259.305	3.983	258.881	3.5162
10.43	259.305	4.1361	258.896	3.5162
10.47	259.275	4.2893	258.896	3.5162
10.5	259.29	4.2893	258.896	3.3633
10.53	259.305	4.4425	258.896	3.3633
10.57	259.275	4.4425	258.866	3.2104
10.6	259.26	4.5957	258.835	3.3633
10.63	259.26	4.5957	258.82	3.3633
10.67	259.26	4.5957	258.835	3.3633
10.7	259.26	4.5957	258.835	3.3633
10.73	259.26	4.5957	258.835	3.2104
10.77	259.229	4.5957	258.82	3.2104
10.8	259.183	4.5957	258.82	3.2104
10.83	259.168	4.7489	258.805	3.2104
10.87	259.152	4.7489	258.789	3.0575
10.9	259.152	4.7489	258.805	3.0575
10.93	259.168	4.7489	258.835	2.9047
10.97	259.152	4.5957	258.82	2.7518
11	259.168	4.5957	258.774	2.7518
11.03	259.168	4.5957	258.774	2.7518
11.07	259.168	4.4425	258.759	2.5989
11.1	259.168	4.1361	258.743	2.5989
11.13	259.152	4.1361	258.743	2.7518
11.17	259.137	3.983	258.728	2.7518
11.2	259.137	3.983	258.728	2.7518
11.23	259.122	3.983	258.728	2.9047
11.27	259.091	3.983	258.697	2.9047
11.3	259.091	4.1361	258.697	3.0575
11.33	259.076	4.1361	258.697	3.2104
11.37	259.045	4.2893	258.682	3.3633
11.4	259.03	4.2893	258.667	3.3633
11.43	259.03	4.2893	258.652	3.5162
11.47	259.014	4.2893	258.636	3.669
11.5	259.03	4.2893	258.636	3.669
11.53	259.06	4.2893	258.652	3.669
11.57	259.014	4.2893	258.652	3.669
11.6	259.014	4.2893	258.636	3.669
11.63	259.014	4.1361	258.636	3.669
11.67	258.984	4.1361	258.621	3.8219
11.7	258.969	4.2893	258.636	3.669
11.73	258.969	4.2893	258.652	3.669
11.77	258.953	4.2893	258.636	3.669
11.8	258.938	4.4425	258.606	3.669
11.83	258.953	4.4425	258.606	3.5162
11.87	258.953	4.2893	258.591	3.5162
11.9	258.953	4.2893	258.591	3.5162
11.93	258.923	4.2893	258.591	3.5162
11.97	258.907	4.2893	258.575	3.5162
12	258.923	4.1361	258.56	3.5162
12.03	258.923	4.1361	258.56	3.5162
12.07	258.907	3.983	258.575	3.5162
12.1	258.923	3.983	258.56	3.3633
12.13	258.938	3.8298	258.545	3.3633
12.17	258.953	3.8298	258.514	3.5162
12.2	258.938	3.6766	258.499	3.5162
12.23	258.907	3.6766	258.499	3.5162
12.27	258.861	3.8298	258.483	3.5162
12.3	258.8	3.8298	258.468	3.3633
12.33	258.8	3.983	258.468	3.5162
12.37	258.831	3.983	258.468	3.5162
12.4	258.831	3.8298	258.468	3.5162
12.43	258.861	3.8298	258.468	3.5162
12.47	258.861	3.6766	258.483	3.3633
12.5	258.861	3.5234	258.499	3.3633
12.53	258.861	3.3702	258.468	3.3633
12.57	258.831	3.217	258.453	3.2104
12.6	258.815	3.217	258.438	3.2104
12.63	258.785	3.217	258.438	3.2104
12.67	258.8	3.0638	258.453	3.2104
12.7	258.8	3.0638	258.453	3.2104
12.73	258.785	3.217	258.438	3.2104
12.77	258.769	3.217	258.438	3.2104
12.8	258.769	3.217	258.407	3.2104
12.83	258.785	3.217	258.392	3.3633
12.87	258.785	3.0638	258.376	3.3633
12.9	258.754	3.0638	258.376	3.3633
12.93	258.723	3.0638	258.346	3.3633
12.97	258.693	3.0638	258.346	3.5162
13	258.662	3.217	258.346	3.5162
13.03	258.693	3.3702	258.361	3.5162
13.07	258.739	3.3702	258.361	3.3633
13.1	258.739	3.3702	258.361	3.3633
13.13	258.723	3.3702	258.346	3.3633
13.17	258.693	3.3702	258.361	3.2104
13.2	258.647	3.3702	258.361	3.2104
13.23	258.647	3.5234	258.346	3.0575
13.27	258.677	3.5234	258.331	3.0575
13.3	258.708	3.5234	258.315	3.0575
13.33	258.647	3.5234	258.3	3.0575
13.37	258.616	3.6766	258.3	3.0575
13.4	258.662	3.6766	258.285	3.0575
13.43	258.662	3.5234	258.3	2.9047
13.47	258.677	3.3702	258.3	2.9047
13.5	258.647	3.217	258.285	2.9047
13.53	258.632	3.217	258.269	2.9047
13.57	258.616	3.0638	258.254	2.9047
13.6	258.632	3.0638	258.254	3.0575
13.63	258.647	3.0638	258.269	3.0575
13.67	258.647	3.217	258.3	3.0575
13.7	258.616	3.217	258.285	2.9047
13.73	258.601	3.217	258.269	2.9047
13.77	258.601	3.217	258.239	2.9047
13.8	258.601	3.0638	258.224	2.9047
13.83	258.601	2.9106	258.224	2.9047
13.87	258.586	2.9106	258.224	2.9047
13.9	258.57	2.7574	258.239	2.7518
13.93	258.54	2.9106	258.254	2.7518
13.97	258.57	2.9106	258.239	2.7518
14	258.586	2.7574	258.208	2.5989
14.03	258.586	2.6042	258.193	2.5989
14.07	258.555	2.6042	258.178	2.5989
14.1	258.54	2.6042	258.162	2.5989
14.13	258.54	2.6042	258.147	2.5989
14.17	258.524	2.6042	258.132	2.7518
14.2	258.478	2.6042	258.116	2.9047
14.23	258.448	2.6042	258.132	2.9047
14.27	258.478	2.7574	258.132	3.0575
14.3	258.509	2.7574	258.116	3.0575
14.33	258.494	2.9106	258.116	3.2104
14.37	258.463	3.0638	258.132	3.2104
14.4	258.417	3.0638	258.116	3.2104
14.43	258.402	3.217	258.116	3.2104
14.47	258.432	3.217	258.116	3.2104
14.5	258.448	3.217	258.086	3.2104
14.53	258.448	3.3702	258.071	3.2104
14.57	258.448	3.3702	258.055	3.2104
14.6	258.432	3.3702	258.055	3.3633
14.63	258.432	3.3702	258.071	3.3633
14.67	258.432	3.3702	258.086	3.3633
14.7	258.417	3.5234	258.086	3.3633
14.73	258.402	3.5234	258.071	3.3633
14.77	258.386	3.5234	258.04	3.3633
14.8	258.386	3.5234	258.01	3.3633
14.83	258.386	3.5234	257.994	3.5162
14.87	258.356	3.5234	257.994	3.5162
14.9	258.325	3.6766	257.979	3.669
14.93	258.356	3.6766	257.964	3.8219
14.97	258.402	3.5234	257.964	3.8219
15	258.356	3.5234	257.964	3.8219
15.03	258.371	3.3702	257.979	3.669
15.07	258.371	3.3702	257.994	3.669
15.1	258.371	3.217	257.994	3.669
15.13	258.356	3.217	257.979	3.5162
15.17	258.34	3.0638	257.979	3.5162
15.2	258.34	3.0638	257.979	3.5162
15.23	258.34	3.0638	257.964	3.3633
15.27	258.356	2.9106	257.964	3.2104
15.3	258.34	2.9106	257.948	3.0575
15.33	258.34	2.7574	257.933	3.0575
15.37	258.31	2.6042	257.948	3.0575
15.4	258.31	2.451	257.964	2.9047
15.43	258.295	2.451	257.948	2.9047
15.47	258.31	2.2979	257.933	2.7518
15.5	258.295	2.2979	257.918	2.7518
15.53	258.34	2.1447	257.902	2.9047
15.57	258.34	2.1447	257.918	2.9047
15.6	258.31	2.1447	257.918	2.7518
15.63	258.264	2.1447	257.902	2.7518
15.67	258.218	2.1447	257.902	2.7518
15.7	258.218	2.2979	257.887	2.7518
15.73	258.218	2.451	257.887	2.5989
15.77	258.218	2.6042	257.872	2.5989
15.8	258.233	2.6042	257.857	2.5989
15.83	258.248	2.6042	257.872	2.5989
15.87	258.248	2.6042	257.872	2.5989
15.9	258.218	2.6042	257.887	2.446
15.93	258.203	2.6042	257.872	2.446
15.97	258.203	2.6042	257.872	2.446
16	258.218	2.6042	257.857	2.2931
16.03	258.187	2.6042	257.811	2.2931
16.07	258.157	2.6042	257.796	2.2931
16.1	258.141	2.7574	257.765	2.2931
16.13	258.141	2.9106	257.765	2.446
16.17	258.111	3.0638	257.78	2.5989
16.2	258.08	3.217	257.78	2.7518
16.23	258.08	3.5234	257.75	2.7518
16.27	258.095	3.6766	257.734	3.0575
16.3	258.126	3.6766	257.75	3.2104
16.33	258.095	3.8298	257.765	3.2104
16.37	258.111	3.8298	257.765	3.2104
16.4	258.095	3.8298	257.765	3.2104
16.43	258.111	3.8298	257.78	3.2104
16.47	258.126	3.6766	257.796	3.0575
16.5	258.126	3.6766	257.796	3.0575
16.53	258.095	3.6766	257.78	2.9047
16.57	258.065	3.6766	257.734	2.9047
16.6	258.049	3.6766	257.719	2.9047
16.63	258.08	3.6766	257.734	2.9047
16.67	258.141	3.3702	257.734	2.9047
16.7	258.218	3.0638	257.734	2.9047
16.73	258.218	2.7574	257.719	2.9047
16.77	258.172	2.6042	257.704	2.7518
16.8	258.08	2.6042	257.688	2.7518
16.83	257.927	2.7574	257.688	2.9047
16.87	257.82	3.0638	257.688	2.9047
16.9					0
16.9	257.743	3.3702	257.658	2.9047	500
16.93	257.651	3.983	257.688	2.7518
16.97	257.513	4.7489	257.796	2.5989
17	257.467	5.668	257.872	2.1403
17.03	257.375	6.7404	257.918	1.6816
17.07	257.253	7.9659	257.918	1.223
17.1	257.146	9.1914	257.902	0.9173
17.13	257.038	10.5701	257.857	0.6115
17.17	256.946	11.9489	257.826	0.3058
17.2	256.87	13.3276	257.78	0.1529
17.23	256.778	14.8595	257.704	0.1529
17.27	256.701	16.3914	257.627	0.1529
17.3	256.563	17.9233	257.566	0.4586
17.33	256.456	19.6084	257.474	0.7644
17.37	256.349	21.2935	257.398	1.223
17.4	256.242	23.1318	257.291	1.9874
17.43	256.135	24.97	257.215	2.9047
17.47	256.027	26.9615	257.153	3.8219
17.5	255.905	28.7998	257.077	4.7392
17.53	255.767	30.9445	257.016	5.8093
17.57	255.614	33.0891	256.939	7.0323
17.6	255.506	35.0806	256.832	8.2553
17.63	255.415	37.0721	256.725	9.6312
17.67	255.338	38.9104	256.649	11.16
17.7	255.231	40.7487	256.603	12.5359
17.73	255.154	42.2806	256.527	13.9118
17.77	255.016	43.9657	256.435	15.2876
17.8	254.848	45.6508	256.374	16.8164
17.83	254.725	47.1827	256.313	18.1923
17.87	254.603	48.5614	256.251	19.5682
17.9	254.526	49.9401	256.144	20.9441
17.93	254.403	51.3188	256.037	22.6257
17.97	254.25	52.3911	255.961	24.1545
18	254.112	53.3103	255.9	25.6832
18.03	254.02	53.923	255.808	27.0591
18.07	253.929	54.3826	255.701	28.5879
18.1	253.867	54.5358	255.609	30.1167
18.13	253.791	54.5358	255.533	31.6454
18.17	253.699	54.689	255.457	33.1742
18.2	253.591	54.8422	255.35	34.5501
18.23	253.438	54.9954	255.258	36.0788
18.27	253.331	55.1486	255.151	37.4547
18.3	253.255	55.3018	255.09	38.372
18.33	253.132	55.3018	255.013	39.1364
18.37	253.009	55.3018	254.952	39.7479
18.4	252.887	55.455	254.86	40.0536
18.43	252.78	55.6081	254.768	40.3594
18.47	252.718	55.455	254.707	40.6651
18.5	252.657	55.455	254.631	40.818
18.53	252.535	55.3018	254.57	40.818
18.57	252.397	55.1486	254.509	40.818
18.6	252.274	54.9954	254.402	40.818
18.63	252.167	54.8422	254.31	40.818
18.67	252.044	54.689	254.218	40.818
18.7	251.876	54.689	254.126	40.9709
18.73	251.753	54.689	254.019	41.1238
18.77	251.661	54.689	253.928	41.2766
18.8	251.554	54.689	253.851	41.2766
18.83	251.431	54.689	253.76	41.4295
18.87	251.324	54.689	253.653	41.5824
18.9	251.232	54.689	253.591	41.5824
18.93	251.141	54.689	253.515	41.7353
18.97	251.033	54.689	253.408	41.8881
19	250.911	54.689	253.301	42.041
19.03	250.804	54.689	253.225	42.1939
19.07	250.696	54.5358	253.133	42.3468
19.1	250.589	54.3826	253.041	42.4996
19.13	250.543	54.3826	252.949	42.6525
19.17	250.359	54.3826	252.858	42.6525
19.2	249.838	55.3018	252.751	42.8054
19.23	249.226	56.9869	252.659	42.9583
19.27	248.72	59.2847	252.598	42.9583
19.3						0
19.3	248.337	62.0421	252.506	43.1111		500
19.33	248.046	65.106	252.368	43.264
19.37	247.801	68.1698	252.017	43.8755
19.4	247.602	71.2336	251.497	45.2514
19.43	247.449	74.1442	251.023	47.3917
19.47	247.249	76.9016	250.58	49.9906
19.5	247.066	79.659	250.274	52.8952
19.53	246.851	82.2633	250.029	55.7999
19.57	246.637	85.0207	249.815	59.0103
19.6	246.438	87.625	249.617	62.0678
19.63	246.315	89.9228	249.418	65.2782
19.67	246.131	92.2207	249.219	68.3358
19.7	245.978	94.3653	249.051	71.2404
19.73	245.794	96.3568	248.883	74.1451
19.77	245.61	98.3483	248.699	77.0497
19.8	245.411	100.033	248.531	79.6486
19.83	245.243	101.565	248.363	82.2475
19.87	245.074	102.944	248.195	84.6935
19.9	244.936	104.016	248.027	86.9867
19.93	244.768	105.089	247.874	89.127
19.97	244.584	105.855	247.66	91.1143
20	244.4	106.621	247.476	93.1017
20.03	244.216	107.233	247.323	94.9363
20.07	244.078	107.54	247.171	96.6179
20.1	243.925	107.693	247.018	97.9938
20.13	243.711	107.693	246.865	99.2168
20.17	243.558	107.54	246.727	100.287
20.2	243.374	107.08	246.59	101.051
20.23	243.175	106.467	246.422	101.663
20.27	243.006	105.701	246.253	101.969
20.3	242.838	104.476	246.085	102.121
20.33	242.654	103.25	245.917	102.121
20.37	242.516	101.565	245.749	101.969
20.4	242.332	99.727	245.581	101.51
20.43	242.163	97.5823	245.443	100.746
20.47	241.98	94.9781	245.305	99.6754
20.5	241.735	92.527	245.153	98.4524
20.53	241.551	90.5356	244.969	96.9236
20.57	241.336	89.31	244.801	95.242
20.6	241.137	88.6973	244.602	93.2546
20.63	240.953	88.5441	244.434	91.1143
20.67	240.8	88.3909	244.266	88.6683
20.7	240.601	88.5441	244.113	86.3752
20.73	240.387	88.6973	243.96	84.6935
20.77	240.187	88.8505	243.823	83.4705
20.8	240.019	89.0037	243.654	82.859
20.83	239.866	89.0037	243.517	82.2475
20.87	239.697	89.1569	243.349	81.7889
20.9	239.498	89.4632	243.18	81.4831
20.93	239.207	90.076	242.997	81.3303
20.97	238.931	90.5356	242.829	81.1774
21	238.701	91.3015	242.691	81.0245
21.03	238.502	91.9143	242.554	80.8716
21.07	238.303	92.527	242.431	80.7187
21.1	238.104	93.1398	242.279	80.413
21.13	237.92	93.7526	242.11	80.2601
21.17	237.752	94.3653	241.973	80.1072
21.2	237.598	94.8249	241.82	79.8015
21.23	237.415	95.2845	241.652	79.6486
21.27	237.246	95.5909	241.453	79.6486
21.3	237.062	95.8972	241.285	79.6486
21.33	236.894	96.2036	241.117	79.6486
21.37	236.741	96.3568	240.933	79.8015
21.4	236.557	96.51	240.765	79.9544
21.43	236.404	96.51	240.627	79.9544
21.47	236.22	96.51	240.475	79.9544
21.5	236.051	96.3568	240.306	79.9544
21.53	235.867	96.2036	240.154	79.9544
21.57	235.684	96.2036	240.001	79.8015
21.6	235.454	96.0504	239.833	79.8015
21.63	235.27	96.0504	239.68	79.8015
21.67	235.086	95.8972	239.512	79.8015
21.7	234.933	95.5909	239.359	79.8015
21.73	234.749	95.2845	239.221	79.8015
21.77	234.55	94.9781	239.053	79.8015
21.8	234.335	94.6717	238.885	79.6486
21.83	234.09	94.5185	238.732	79.4957
21.87	233.799	94.6717	238.564	79.4957
21.9	233.478	94.9781	238.395	79.4957
21.93							0
21.93	233.141	95.5909	238.227	79.6486			500
21.97	232.773	96.51	238.09	79.6486
22	232.421	97.5823	237.983	79.6486
22.03	232.099	98.8079	237.845	79.4957
22.07	231.762	100.187	237.677	79.4957
22.1	231.425	101.872	237.494	79.4957
22.13	231.103	103.71	237.28	79.4957
22.17	230.736	105.548	237.081	79.6486
22.2	230.352	107.54	236.851	79.8015
22.23	229.954	109.838	236.607	80.2601
22.27	229.556	112.595	236.362	80.8716
22.3	229.173	115.506	236.118	81.636
22.33	228.821	118.723	235.858	82.4004
22.37	228.422	122.093	235.567	83.4705
22.4	228.009	125.616	235.292	84.5407
22.43	227.58	129.446	235.032	85.7637
22.47	227.212	133.276	234.772	86.9867
22.5	226.722	137.259	234.512	88.3626
22.53	226.385	141.088	234.268	89.8913
22.57	225.987	145.071	234.038	91.2672
22.6	225.604	148.901	233.779	92.796
22.63	225.221	152.731	233.534	94.4776
22.67	224.822	156.561	233.289	96.1593
22.7	224.378	160.237	233.045	97.8409
22.73	223.964	164.067	232.785	99.6754
22.77	223.566	167.59	232.51	101.51
22.8	223.153	170.961	232.25	103.344
22.83	222.785	174.178	231.975	105.179
22.87	222.433	177.241	231.73	107.013
22.9	222.08	179.846	231.486	108.848
22.93	221.697	182.45	231.226	110.683
22.97	221.284	184.901	230.95	112.364
23	220.855	187.046	230.675	114.199
23.03	220.426	189.037	230.415	115.88
23.07	220.012	190.722	230.186	117.562
23.1	219.583	192.254	229.941	118.938
23.13	219.154	193.633	229.697	120.467
23.17	218.725	194.705	229.406	121.843
23.2	218.342	195.624	229.131	123.066
23.23	217.975	196.39	228.871	124.288
23.27	217.576	197.156	228.627	125.511
23.3	217.163	197.922	228.382	126.429
23.33	216.734	198.535	228.137	127.04
23.37	216.336	199.148	227.878	127.652
23.4	215.937	199.607	227.618	127.958
23.43	215.539	200.067	227.343	128.263
23.47	215.125	200.22	227.083	128.416
23.5	214.727	200.526	226.853	128.416
23.53	214.329	200.679	226.593	128.416
23.57	213.915	200.833	226.303	128.569
23.6	213.517	200.986	226.074	128.416
23.63	213.134	201.139	225.814	128.416
23.67	212.72	201.139	225.554	128.416
23.7	212.276	201.292	225.309	128.416
23.73	211.862	201.446	225.065	128.416
23.77	211.464	201.599	224.82	128.416
23.8	211.112	201.599	224.576	128.416
23.83	210.744	201.752	224.346	128.263
23.87	210.392	201.599	224.101	128.263
23.9	210.024	201.446	223.842	128.11
23.93	209.641	201.292	223.582	127.958
23.97	209.228	200.986	223.307	127.958
24	208.814	200.833	223.031	127.805
24.03	208.37	200.833	222.772	127.805
24.07	208.002	200.833	222.496	127.652
24.1	207.558	200.833	222.236	127.652
24.13	207.129	200.986	221.961	127.805
24.17	206.731	200.986	221.732	127.805
24.2	206.348	200.833	221.503	127.652
24.23	205.965	200.679	221.243	127.652
24.27	205.566	200.373	220.998	127.499
24.3	205.199	200.067	220.754	127.499
24.33	204.77	199.76	220.524	127.346
24.37	204.402	199.607	220.234	127.346
24.4	204.019	199.454	219.974	127.346
24.43	203.621	199.148	219.714	127.346
24.47	203.238	198.994	219.469	127.193
24.5	202.839	198.994	219.225	127.193
24.53	202.518	198.688	218.995	127.193
24.57								0
24.57	202.242	198.228	218.736	127.04				500
24.6	201.92	197.463	218.476	127.04
24.63	201.553	196.85	218.231	127.04
24.67	201.139	196.39	218.017	126.887
24.7	200.756	195.777	217.803	126.582
24.73	200.343	195.318	217.543	126.429
24.77	199.914	195.012	217.222	126.429
24.8	199.5	194.705	216.932	126.582
24.83	199.071	194.399	216.641	126.582
24.87	198.627	194.399	216.32	126.887
24.9	198.213	194.245	215.984	127.193
24.93	197.83	194.245	215.632	127.805
24.97	197.355	194.399	215.281	128.569
25	196.911	194.552	214.929	129.333
25.03	196.482	195.012	214.593	130.404
25.07	196.084	195.471	214.226	131.474
25.1	195.685	195.931	213.889	132.544
25.13	195.257	196.39	213.553	133.767
25.17	194.858	196.697	213.217	134.99
25.2	194.475	197.003	212.88	136.366
25.23	194.077	197.156	212.559	137.589
25.27	193.602	197.463	212.208	138.965
25.3	193.204	197.769	211.887	140.493
25.33	192.79	198.228	211.535	142.022
25.37	192.346	198.688	211.153	143.704
25.4	191.902	199.301	210.786	145.538
25.43	191.503	199.914	210.45	147.22
25.47	191.09	200.679	210.098	149.207
25.5	190.707	201.292	209.746	151.042
25.53	190.339	201.905	209.38	152.876
25.57	189.895	202.518	209.028	154.711
25.6	189.481	203.131	208.692	156.393
25.63	189.068	203.743	208.355	158.074
25.67	188.669	204.356	207.958	159.756
25.7	188.271	204.969	207.606	161.59
25.73	187.857	205.582	207.255	163.272
25.77	187.459	206.041	206.918	164.801
25.8	187.061	206.501	206.567	166.329
25.83	186.632	206.96	206.215	167.858
25.87	186.203	207.42	205.863	169.081
25.9	185.805	207.573	205.512	170.304
25.93	185.406	207.42	205.145	171.375
25.97	184.977	207.267	204.763	172.445
26	184.564	207.113	204.411	173.362
26.03	184.196	206.807	204.075	173.973
26.07	183.798	206.501	203.738	174.279
26.1	183.354	206.348	203.417	174.585
26.13	182.94	206.041	203.066	174.891
26.17	182.496	205.888	202.699	175.043
26.2	182.082	205.888	202.347	175.196
26.23	181.669	205.735	201.935	175.349
26.27	181.24	205.582	201.583	175.655
26.3	180.826	205.582	201.231	175.808
26.33	180.412	205.735	200.88	175.961
26.37	180.014	205.735	200.543	176.114
26.4	179.616	205.735	200.192	176.419
26.43	179.218	205.735	199.855	176.572
26.47	178.773	205.735	199.504	176.572
26.5	178.36	205.735	199.137	176.725
26.53	177.946	205.735	198.755	176.878
26.57	177.548	205.582	198.403	176.878
26.6	177.134	205.735	198.067	176.878
26.63	176.705	205.735	197.715	176.878
26.67	176.307	205.735	197.363	176.878
26.7	175.909	205.735	197.012	176.878
26.73	175.51	205.888	196.66	176.878
26.77	175.081	206.041	196.309	176.878
26.8	174.653	206.194	195.926	176.878
26.83	174.239	206.194	195.575	176.878
26.87	173.841	206.194	195.223	177.031
26.9	173.473	206.194	194.887	177.031
26.93	173.059	206.194	194.566	176.878
26.97	172.661	206.194	194.245	176.725
27	172.263	206.041	193.908	176.572
27.03	171.849	205.888	193.542	176.572
27.07	171.374	206.041	193.205	176.419
27.1	170.961	206.041	192.838	176.267
27.13	170.562	205.888	192.502	176.114
27.17	170.149	205.888	192.15	176.114
27.2	169.796	205.888	191.814	175.808
27.23	169.505	205.428	191.447	175.655
27.27	169.23	204.816	191.111	175.655
27.3	168.969	204.05	190.774	175.502

## Sheet: 2 mg.ml primary data n=2
Time [min]	1A: O2 Concentration [nmol/ml]	1A: O2 Slope uncorr. [pmol/(s*ml)]	1B: O2 Concentration [nmol/ml]	1B: O2 Slope uncorr. [pmol/(s*ml)]	mitos	NADH	ADP	cyt c
0	244.935		244.962
0.03	244.935		244.962
0.07	244.966		244.962
0.1	244.982		244.977
0.13	245.028	-11.5029	244.962	-0.7688
0.17	245.028	-12.2698	244.962	0
0.2	245.043	-9.9692	244.946	2.3063
0.23	245.028	-5.368	244.946	3.8439
0.27	245.012	1.5337	244.946	2.3063
0.3	244.982	-4.2944	244.946	1.23
0.33	245.012	-2.9141	244.977	0.615
0.37	245.028	-1.3804	244.977	0
0.4	245.012	0	244.962	-0.1538
0.43	244.997	1.6871	244.946	-0.3075
0.47	244.982	-1.6871	244.962	0.1538
0.5	244.966	-0.3067	244.946	0.3075
0.53	244.966	0.9202	244.931	0.615
0.57	244.997	1.5337	244.931	0.7688
0.6	244.997	1.9938	244.931	0.7688
0.63	245.012	-0.4601	244.946	0.7688
0.67	245.012	-0.1534	244.962	0.615
0.7	245.012	0.3067	244.946	0.615
0.73	244.997	0.6135	244.915	0.7688
0.77	244.951	1.227	244.885	1.0763
0.8	244.966	0	244.885	1.0763
0.83	244.982	0.3067	244.885	1.3838
0.87	244.966	0.7669	244.854	1.6913
0.9	244.966	1.0736	244.854	1.9988
0.93	244.935	1.3804	244.839	2.1526
0.97	244.935	0.4601	244.854	1.8451
1	244.92	0.9202	244.869	1.9988
1.03	244.905	1.3804	244.9	1.9988
1.07	244.92	1.6871	244.9	1.9988
1.1	244.935	1.8405	244.915	1.8451
1.13	244.951	0.9202	244.915	1.5375
1.17	244.92	1.227	244.9	1.5375
1.2	244.889	1.5337	244.869	1.5375
1.23	244.859	1.8405	244.854	1.5375
1.27	244.843	2.1472	244.854	1.6913
1.3	244.843	1.5337	244.839	1.5375
1.33	244.874	1.8405	244.839	1.6913
1.37	244.889	1.9938	244.839	1.6913
1.4	244.935	1.9938	244.839	1.6913
1.43	244.966	1.9938	244.854	1.6913
1.47	244.966	1.8405	244.854	1.6913
1.5	244.951	1.6871	244.885	1.6913
1.53	244.966	1.5337	244.915	1.5375
1.57	244.966	1.3804	244.931	1.3838
1.6	244.951	1.227	244.885	1.3838
1.63	244.982	1.227	244.869	1.23
1.67	244.951	1.0736	244.839	1.23
1.7	244.951	0.9202	244.808	1.23
1.73	244.951	0.7669	244.808	1.23
1.77	244.92	0.7669	244.823	1.23
1.8	244.889	0.7669	244.823	1.23
1.83	244.905	0.7669	244.808	1.23
1.87	244.889	0.9202	244.792	1.23
1.9	244.874	0.9202	244.777	1.3838
1.93	244.889	0.9202	244.777	1.3838
1.97	244.92	0.7669	244.762	1.3838
2	244.935	0.6135	244.777	1.3838
2.03	244.92	0.4601	244.792	1.23
2.07	244.92	0.3067	244.777	1.3838
2.1	244.935	0.3067	244.777	1.3838
2.13	244.92	0.1534	244.777	1.3838
2.17	244.92	0.1534	244.762	1.5375
2.2	244.874	0.1534	244.762	1.6913
2.23	244.828	0.1534	244.777	1.6913
2.27	244.828	0.3067	244.762	1.8451
2.3	244.874	0.3067	244.762	1.8451
2.33	244.874	0.4601	244.762	1.9988
2.37	244.859	0.4601	244.746	1.9988
2.4	244.843	0.6135	244.746	1.9988
2.43	244.828	0.7669	244.762	1.8451
2.47	244.813	0.7669	244.762	1.8451
2.5	244.828	0.9202	244.746	1.8451
2.53	244.828	1.0736	244.731	1.8451
2.57	244.813	1.227	244.7	1.8451
2.6	244.843	1.5337	244.715	1.9988
2.63	244.874	1.6871	244.731	1.9988
2.67	244.859	1.6871	244.7	2.1526
2.7	244.828	1.8405	244.669	2.3063
2.73	244.813	1.9938	244.669	2.4601
2.77	244.797	1.9938	244.669	2.4601
2.8	244.828	1.9938	244.669	2.4601
2.83	244.843	1.9938	244.669	2.4601
2.87	244.843	1.8405	244.685	2.3063
2.9	244.828	1.8405	244.685	2.1526
2.93	244.797	1.8405	244.669	2.1526
2.97	244.797	1.6871	244.669	1.9988
3	244.843	1.5337	244.669	1.9988
3.03	244.843	1.5337	244.669	1.9988
3.07	244.828	1.3804	244.654	1.9988
3.1	244.813	1.3804	244.623	2.1526
3.13	244.797	1.3804	244.608	2.1526
3.17	244.782	1.3804	244.608	2.1526
3.2	244.782	1.5337	244.623	2.3063
3.23	244.767	1.5337	244.639	2.3063
3.27	244.767	1.6871	244.623	2.3063
3.3	244.767	1.6871	244.608	2.3063
3.33	244.813	1.5337	244.623	2.4601
3.37	244.797	1.3804	244.623	2.3063
3.4	244.767	1.3804	244.623	2.3063
3.43	244.751	1.3804	244.608	2.3063
3.47	244.751	1.227	244.593	2.3063
3.5	244.751	1.227	244.577	2.4601
3.53	244.736	1.227	244.577	2.4601
3.57	244.751	1.3804	244.562	2.4601
3.6	244.736	1.3804	244.577	2.4601
3.63	244.767	1.3804	244.577	2.4601
3.67	244.797	1.227	244.593	2.3063
3.7	244.782	1.227	244.608	2.3063
3.73	244.782	1.227	244.608	2.1526
3.77	244.782	1.0736	244.608	1.9988
3.8	244.782	1.0736	244.608	1.8451
3.83	244.797	1.0736	244.593	1.6913
3.87	244.797	1.0736	244.593	1.6913
3.9	244.751	1.0736	244.608	1.5375
3.93	244.721	1.0736	244.593	1.5375
3.97	244.721	1.0736	244.562	1.3838
4	244.797	0.9202	244.562	1.3838
4.03	244.751	0.9202	244.546	1.3838
4.07	244.736	0.9202	244.531	1.5375
4.1	244.736	1.0736	244.531	1.5375
4.13	244.736	1.0736	244.546	1.5375
4.17	244.736	1.0736	244.562	1.5375
4.2	244.598	1.227	244.562	1.3838
4.23	244.337	1.8405	244.562	1.3838
4.27	244.092	3.0674	244.562	1.23
4.3	243.877	4.4478	244.546	1.23
4.33	243.632	6.2883	244.516	1.23
4.37	243.417	8.2821	244.5	1.23
4.4	243.264	10.4293	248.067	-5.2276
4.43	243.126	12.8833	245.73	-7.0727
4.47	242.942	15.3372	244.9	-7.2265
4.5					0
4.5	242.788	18.0979	244.777	-7.2265	500
4.53	242.635	20.8586	244.792	-7.2265
4.57	242.482	23.6193	244.777	-7.2265
4.6	242.328	26.6868	244.762	-7.0727
4.63	242.113	29.7542	244.746	-6.9189
4.67	241.914	32.8217	244.715	-6.7652
4.7	241.73	36.1958	244.685	-6.4577
4.73	241.546	39.4167	244.639	-5.9964
4.77	241.393	42.7909	244.608	-5.5352
4.8	241.3	46.0117	244.531	-4.9201
4.83	241.132	49.2325	244.454	-4.1514
4.87	240.917	52.4533	244.377	-3.2288
4.9	240.748	55.6741	244.285	-2.1526
4.93	240.549	58.8949	244.193	-0.9225
4.97	240.38	61.9624	244.116	0.3075
5	240.227	64.8765	244.008	1.8451
5.03	240.058	67.6372	243.916	3.3826
5.07	239.889	70.2445	243.824	4.9201
5.1	239.705	72.8518	243.701	6.7652
5.13	239.583	75.1524	243.608	8.6102
5.17	239.445	77.1462	243.516	10.6091
5.2	239.245	78.9867	243.424	12.6079
5.23	239.092	80.6738	243.301	14.7604
5.27	238.985	82.2075	243.209	16.913
5.3	238.816	83.4345	243.101	19.2193
5.33	238.632	84.2014	242.993	21.6794
5.37	238.478	84.8148	242.886	24.1394
5.4	238.31	85.275	242.824	26.5995
5.43	238.187	85.275	242.732	28.9058
5.47	238.08	84.8148	242.624	31.3659
5.5	237.942	84.048	242.486	33.9797
5.53	237.788	83.2811	242.394	36.4398
5.57	237.666	82.5143	242.286	38.8999
5.6	237.482	81.9008	242.225	41.2062
5.63	237.313	81.4407	242.148	43.5125
5.67	237.175	80.9805	242.071	45.8188
5.7	236.991	80.6738	241.979	48.1251
5.73	236.853	80.367	241.886	43.5125
5.77	236.73	80.0603	241.779	42.8975
5.8	236.592	79.6002	241.686	43.6662
5.83	236.454	79.1401	241.579	44.7425
5.87	236.347	78.68	241.487	45.5113
5.9	236.193	78.0665	241.394	46.1263
5.93	236.071	77.453	241.317	46.7413
5.97	235.933	76.8395	241.256	47.0488
6	235.779	76.3794	241.179	47.3564
6.03	235.61	76.0726	241.102	47.5101
6.07	235.442	75.7659	241.01	47.5101
6.1	235.227	75.4591	240.918	47.3564
6.13	235.058	75.3058	240.81	47.3564
6.17	234.92	74.999	240.702	47.2026
6.2	234.782	74.6923	240.595	47.2026
6.23	234.598	74.6923	240.518	47.0488
6.27	234.445	74.5389	240.426	46.8951
6.3	234.291	74.5389	240.333	46.7413
6.33	234.138	74.6923	240.241	46.5876
6.37	233.985	74.6923	240.149	46.4338
6.4	233.862	74.6923	240.057	46.2801
6.43	233.724	74.6923	239.949	46.1263
6.47	233.54	74.8456	239.826	46.1263
6.5	233.371	74.8456	239.749	45.9726
6.53	233.218	74.999	239.642	45.9726
6.57	233.095	75.1524	239.549	45.9726
6.6	232.988	75.1524	239.457	45.9726
6.63	232.834	75.1524	239.365	45.9726
6.67	232.666	75.3058	239.257	46.1263
6.7	232.482	75.4591	239.18	46.1263
6.73	232.359	75.6125	239.088	46.1263
6.77	232.236	75.7659	239.027	46.1263
6.8	232.067	75.7659	238.934	45.9726
6.83	231.899	75.7659	238.873	46.1263
6.87	231.761	75.7659	238.765	46.1263
6.9	231.638	75.7659	238.688	46.1263
6.93	231.5	75.6125	238.611	46.1263
6.97	231.347	75.6125	238.504	46.1263
7	231.117	75.7659	238.396	46.1263
7.03	230.749	76.3794	238.304	45.9726
7.07	230.426	77.2996	238.212	45.9726
7.1	230.15	78.2198	238.135	45.9726
7.13	229.89	79.2934	238.042	45.9726
7.17						0
7.17	229.66	80.5204	237.966	45.9726		500
7.2	229.429	81.7474	237.873	45.9726
7.23	229.215	82.821	237.689	46.1263
7.27	228.985	84.048	237.428	46.5876
7.3	228.77	85.275	237.166	47.3564
7.33	228.54	86.5019	236.874	48.2789
7.37	228.341	87.7289	236.628	49.5089
7.4	228.126	89.1093	236.428	50.7389
7.43	227.881	90.4896	236.244	52.1227
7.47	227.696	92.0233	236.09	53.6603
7.5	227.482	93.4037	235.921	55.0441
7.53	227.206	94.784	235.752	56.7354
7.57	226.991	96.3178	235.567	58.2729
7.6	226.776	97.8515	235.398	59.9642
7.63	226.531	99.3852	235.214	61.6555
7.67	226.285	100.919	235.029	63.3468
7.7	226.009	102.453	234.845	65.0381
7.73	225.749	103.986	234.675	66.7294
7.77	225.534	105.52	234.522	68.4207
7.8	225.334	106.9	234.352	70.2658
7.83	225.15	108.127	234.183	71.9571
7.87	224.92	109.354	233.999	73.6484
7.9	224.706	110.428	233.83	75.3397
7.93	224.491	111.348	233.661	76.8772
7.97	224.261	112.269	233.507	78.4147
8	224	113.035	233.338	79.9523
8.03	223.709	113.956	233.153	81.3361
8.07	223.448	114.722	232.969	82.7199
8.1	223.264	115.183	232.799	83.9499
8.13	223.049	115.643	232.646	85.0262
8.17	222.819	115.949	232.461	86.1025
8.2	222.604	115.949	232.277	87.025
8.23	222.39	115.949	232.092	87.7938
8.27	222.19	115.489	231.923	88.4088
8.3	221.976	115.029	231.739	89.0238
8.33	221.73	114.416	231.554	89.4851
8.37	221.5	114.109	231.4	89.6388
8.4	221.239	114.109	231.231	89.7926
8.43	220.948	114.262	231.077	89.6388
8.47	220.795	114.262	230.893	89.4851
8.5	220.626	114.262	230.662	89.0238
8.53	220.396	114.109	230.478	88.5625
8.57	220.166	114.109	230.309	87.9475
8.6	219.905	114.109	230.155	87.4862
8.63	219.66	114.109	229.986	87.1787
8.67	219.445	114.262	229.817	87.025
8.7	219.23	114.109	229.648	87.025
8.73	219	114.109	229.494	87.025
8.77	218.77	113.956	229.309	87.025
8.8	218.494	113.956	229.155	87.025
8.83	218.264	113.956	229.002	87.025
8.87	218.034	113.956	228.848	86.8712
8.9	217.789	113.956	228.663	86.7175
8.93	217.543	113.956	228.51	86.5637
8.97	217.282	114.109	228.341	86.5637
9	217.068	114.109	228.172	86.41
9.03	216.884	114.262	228.018	86.41
9.07	216.684	114.416	227.849	86.2562
9.1	216.47	114.416	227.633	86.2562
9.13	216.286	114.416	227.464	86.1025
9.17	216.04	114.262	227.28	86.1025
9.2							0
9.2	215.749	114.262	227.111	86.1025			500
9.23	215.396	114.416	226.972	85.9487
9.27	214.997	114.876	226.88	85.6412
9.3	214.614	115.643	226.819	85.1799
9.33	214.23	116.716	226.665	84.7187
9.37	213.832	118.097	226.48	84.2574
9.4	213.402	119.937	226.28	83.9499
9.43	212.957	121.931	226.034	83.7961
9.47	212.528	124.078	225.804	83.6424
9.5	212.083	126.532	225.542	83.7961
9.53	211.638	129.293	225.296	84.1037
9.57	211.224	132.054	225.05	84.4112
9.6	210.871	134.968	224.774	85.0262
9.63	210.457	137.882	224.497	85.7949
9.67	210.028	140.949	224.235	86.7175
9.7	209.537	144.323	223.989	87.64
9.73	209.031	148.004	223.743	88.7163
9.77	208.54	151.992	223.497	89.7926
9.8	208.095	155.98	223.267	90.8688
9.83	207.62	159.814	223.021	92.2526
9.87	207.144	163.802	222.775	93.6364
9.9	206.669	167.943	222.513	95.174
9.93	206.224	172.084	222.267	96.7115
9.97	205.78	176.225	222.006	98.2491
10	205.35	180.212	221.714	99.9404
10.03	204.859	184.2	221.422	101.785
10.07	204.46	188.188	221.16	103.63
10.1	204.031	191.869	220.899	105.475
10.13	203.602	195.396	220.668	107.167
10.17	203.188	198.924	220.392	109.012
10.2	202.773	202.145	220.13	110.703
10.23	202.359	205.212	219.884	112.548
10.27	201.945	207.973	219.638	114.086
10.3	201.454	210.733	219.392	115.777
10.33	200.964	213.341	219.115	117.315
10.37	200.519	215.488	218.839	118.852
10.4	200.089	217.328	218.531	120.39
10.43	199.66	218.862	218.254	122.081
10.47	199.231	219.936	218.008	123.618
10.5	198.801	220.703	217.762	125.002
10.53	198.356	221.163	217.501	126.386
10.57	197.911	221.47	217.24	127.462
10.6	197.421	221.93	216.994	128.385
10.63	196.976	222.083	216.748	129
10.67	196.516	222.39	216.502	129.307
10.7	196.056	222.543	216.256	129.461
10.73	195.642	222.543	215.994	129.615
10.77	195.197	222.543	215.748	129.615
10.8	194.752	222.696	215.456	129.769
10.83	194.338	222.543	215.195	129.769
10.87	193.863	222.696	214.964	129.769
10.9	193.387	222.696	214.718	129.769
10.93	192.942	222.543	214.457	129.769
10.97	192.513	222.236	214.18	129.769
11	192.053	222.083	213.918	129.923
11.03	191.562	221.93	213.657	129.923
11.07	191.071	221.93	213.396	129.923
11.1	190.58	222.236	213.165	129.923
11.13	190.089	222.543	212.888	129.923
11.17	189.66	222.85	212.612	129.923
11.2	189.2	223.31	212.319	129.769
11.23	188.786	223.617	212.073	129.769
11.27	188.356	223.923	211.797	129.769
11.3	187.942	224.23	211.535	129.769
11.33	187.482	224.537	211.305	129.615
11.37	187.022	224.844	211.059	129.615
11.4	186.531	225.304	210.828	129.615
11.43	186.102	225.611	210.582	129.461
11.47	185.657	225.764	210.305	129.461
11.5	185.197	226.071	210.029	129.461
11.53	184.752	226.224	209.767	129.461
11.57	184.323	226.224	209.506	129.307
11.6	183.878	226.071	209.229	129.307
11.63	183.448	226.071	208.968	129.307
11.67	183.004	226.224	208.706	129.307
11.7	182.528	226.224	208.445	129.307
11.73	182.068	226.377	208.199	129.307
11.77	181.608	226.377	207.953	129.461
11.8	181.163	226.377	207.707	129.461
11.83	180.719	226.224	207.461	129.461
11.87	180.258	226.224	207.23	129.461
11.9	179.829	226.071	206.984	129.461
11.93	179.353	226.071	206.738	129.307
11.97	178.863	226.071	206.492	129.154
12	178.433	226.224	206.185	129.154
12.03	178.05	226.071	205.923	129
12.07	177.651	225.764	205.677	129
12.1	177.237	225.457	205.416	128.846				0
12.13	176.808	225.15	205.17	128.846				500
12.17	176.347	224.69	204.939	128.692
12.2	175.872	224.384	204.678	128.539
12.23	175.366	224.23	204.401	128.385
12.27	174.875	224.23	204.109	128.385
12.3	174.384	224.077	203.801	128.539
12.33	173.893	224.077	203.494	128.692
12.37	173.449	224.23	203.109	129
12.4	172.958	224.384	202.756	129.615
12.43	172.467	224.69	202.418	130.23
12.47	171.961	225.304	202.064	130.999
12.5	171.47	225.764	201.71	131.921
12.53	170.995	226.377	201.341	132.998
12.57	170.535	226.838	201.003	134.228
12.6	170.028	227.451	200.634	135.611
12.63	169.538	227.911	200.25	137.149
12.67	169.108	228.525	199.865	138.84
12.7	168.633	228.985	199.496	140.531
12.73	168.111	229.598	199.127	142.377
12.77	167.636	230.365	198.758	144.068
12.8	167.145	230.979	198.405	145.913
12.83	166.654	231.745	198.066	147.912
12.87	166.194	232.359	197.697	149.757
12.9	165.719	232.972	197.344	151.756
12.93	165.228	233.586	196.929	153.908
12.97	164.737	234.199	196.56	156.061
13	164.231	234.813	196.206	158.213
13.03	163.756	235.58	195.837	160.366
13.07	163.265	236.193	195.483	162.365
13.1	162.789	236.96	195.114	164.517
13.13	162.298	237.574	194.715	166.516
13.17	161.823	238.187	194.33	168.515
13.2	161.317	238.801	193.93	170.36
13.23	160.765	239.567	193.577	172.205
13.27	160.259	240.334	193.208	173.896
13.3	159.783	241.101	192.823	175.588
13.33	159.323	241.715	192.47	177.125
13.37	158.848	242.175	192.085	178.509
13.4	158.387	242.482	191.716	179.893
13.43	157.897	242.635	191.347	181.123
13.47	157.391	242.788	190.963	182.045
13.5	156.884	242.942	190.594	182.968
13.53	156.409	242.942	190.21	183.583
13.57	155.934	243.095	189.84	184.198
13.6	155.443	243.095	189.471	184.659
13.63	154.952	243.248	189.087	184.966
13.67	154.461	243.402	188.718	185.12
13.7	153.986	243.402	188.349	185.428
13.73	153.51	243.402	187.98	185.735
13.77	153.004	243.555	187.611	185.889
13.8	152.513	243.555	187.257	185.889
13.83	152.023	243.708	186.888	186.043
13.87	151.532	243.862	186.535	186.043
13.9	151.072	243.862	186.166	186.043
13.93	150.596	243.862	185.797	185.889
13.97	150.136	243.862	185.412	186.043
14	149.63	243.862	185.028	186.043
14.03	149.108	243.862	184.613	186.197
14.07	148.618	243.862	184.244	186.35
14.1	148.158	243.862	183.859	186.504
14.13	147.682	243.708	183.49	186.504
14.17	147.237	243.708	183.121	186.658
14.2	146.762	243.402	182.752	186.658
14.23	146.286	243.248	182.399	186.504
14.27	145.765	243.095	182.03	186.504
14.3	145.29	242.942	181.63	186.658
14.33	144.829	242.788	181.292	186.504
14.37	144.369	242.482	180.953	186.504
14.4	143.894	242.328	180.6	186.197
14.43	143.403	242.021	180.231	186.043
14.47	142.912	241.868	179.846	185.889
14.5	142.421	241.561	179.477	185.889
14.53	141.915	241.408	179.108	185.735
14.57	141.424	241.408	178.724	185.735
14.6	140.918	241.561	178.34	185.735
14.63	140.443	241.561	177.986	185.582
14.67	139.952	241.561	177.617	185.582
14.7	139.461	241.561	177.263	185.428
14.73	139.001	241.561	176.894	185.274
14.77	138.511	241.561	176.541	185.12
14.8	138.035	241.408	176.156	185.12
14.83	137.56	241.408	175.757	185.12
14.87	137.069	241.408	175.357	185.12
14.9	136.593	241.408	174.988	185.12
14.93	136.118	241.408	174.634	185.12
14.97	135.642	241.408	174.265	185.274
15	135.182	241.255	173.912	185.12
15.03	134.661	241.255	173.558	185.12
15.07	134.185	241.255	173.189	185.12
15.1	133.695	241.255	172.82	185.12
15.13	133.265	241.255	172.42	184.966
15.17	132.866	240.948	172.066	184.966
15.2	132.468	240.641	171.728	184.813

## Sheet: 2 mg.ml primary data n=3
Time [min]	1A: O2 Concentration [nmol/ml]	1A: O2 Slope uncorr. [pmol/(s*ml)]	1B: O2 Concentration [nmol/ml]	1B: O2 Slope uncorr. [pmol/(s*ml)]	mitos	NADH	ADP	cyt c
0	241.393		237.381
0.03	241.423		237.428
0.07	241.423		237.489
0.1	241.469		237.535
0.13	241.485	-11.5029	237.581	-25.3695
0.17	241.5	-10.7361	237.643	-26.1382
0.2	241.515	-10.7361	237.704	-26.907
0.23	241.561	-10.7361	237.766	-29.2133
0.27	241.577	-12.2698	237.827	-30.7509
0.3	241.607	-11.6563	237.889	-28.2908
0.33	241.623	-11.6563	237.95	-29.0596
0.37	241.638	-11.8097	237.996	-29.2133
0.4	241.653	-11.0428	238.058	-29.5208
0.43	241.684	-11.1962	238.104	-29.3671
0.47	241.684	-10.8894	238.135	-28.1371
0.5	241.715	-10.7361	238.181	-27.8295
0.53	241.73	-10.5827	238.227	-27.3683
0.57	241.776	-10.5827	238.273	-26.907
0.6	241.791	-10.7361	238.319	-26.292
0.63	241.807	-10.8894	238.365	-26.4458
0.67	241.822	-10.7361	238.427	-26.292
0.7	241.883	-11.0428	238.458	-25.8307
0.73	241.899	-11.0428	238.504	-25.5232
0.77	241.945	-11.3495	238.535	-24.9082
0.8	241.96	-11.5029	238.581	-25.3695
0.83	241.991	-11.6563	238.627	-25.062
0.87	242.006	-11.8097	238.673	-24.7545
0.9	242.021	-11.8097	238.704	-24.2932
0.93	242.037	-11.8097	238.734	-23.8319
0.97	242.037	-11.6563	238.765	-24.2932
1	242.021	-11.3495	238.811	-23.9857
1.03	242.144	-11.6563	238.827	-23.5244
1.07	245.564	-22.6991	238.857	-22.9094
1.1	257.711	-72.0849	238.904	-22.4481
1.13	269.337	-118.25	238.842	-22.9094
1.17	262.251	-159.661	239.257	-23.2169
1.2	251.024	-171.317	244.008	-34.5947
1.23	242.512	-161.501	244.454	-46.4338
1.27	236.837	-138.035	236.766	-39.0536
1.3	232.865	-88.8025	221.499	-2.7676
1.33	229.292	-59.3551	207.369	54.7366
1.37	223.77	-21.012	197.175	128.077
1.4	213.601	34.3554	190.625	209.567
1.43	197.62	116.256	186.504	294.132
1.47	184.261	218.402	183.69	378.851
1.5	175.442	331.284	181.107	463.108
1.53	170.167	447.54	179.893	544.29
1.57	167.084	562.723	175.957	627.01
1.6	164.875	674.991	170.913	713.113
1.63	163.28	782.812	166.685	800.445
1.67	164.614	880.817	163.733	886.548
1.7	166.041	969.006	161.934	968.806
1.73	164.798	1052.29	160.75	1045.99
1.77	163.05	1131.58	159.997	1117.18
1.8	161.808	1205.81	160.735	1179.6
1.83	161.087	1273.76	164.271	1228.34
1.87	160.903	1334.34	165.132	1268.32
1.9	161.409	1386.48	163.748	1303.99
1.93	165.412	1423.6	162.011	1335.82
1.97	180.258	1426.36	160.658	1362.72
2	200.381	1386.64	159.812	1383.79
2.03	216.838	1312.71	159.382	1398.24
2.07	227.804	1216.39	158.967	1406.08
2.1	234.552	1106.27	158.721	1406.7
2.13	238.647	988.024	159.382	1398.55
2.17	241.086	864.866	163.964	1374.41
2.2	242.558	738.947	176.279	1320.75
2.23	243.448	611.342	192.239	1232.03
2.27	244.03	482.816	206.631	1112.57
2.3	244.399	353.83	217.393	970.19
2.33	242.267	228.985	224.866	812.284
2.37	241.132	105.98	229.586	644.231
2.4	241.991	-25.153	229.709	475.101
2.43	242.681	-181.439	231.646	301.359
2.47	242.773	-361.498	234.506	121.927
2.5	243.279	-531.435	236.935	-63.0393
2.53	243.724	-682.353	238.196	-259.845
2.57	244.107	-818.241	239.457	-460.341
2.6	244.368	-943.546	240.518	-648.382
2.63	244.445	-1060.72	241.379	-808.287
2.67	245.073	-1171	242.04	-940.516
2.7	245.135	-1269.46	242.501	-1050.6
2.73	245.104	-1346.15	242.824	-1144.39
2.77	245.043	-1389.09	243.04	-1225.88
2.8	245.15	-1401.98	243.163	-1296.76
2.83	245.35	-1392.77	243.27	-1357.34
2.87	245.442	-1366.85	243.378	-1409.93
2.9	245.488	-1328.05	243.485	-1449.29
2.93	245.58	-1277.9	243.624	-1472.81
2.97	245.672	-1217.32	243.762	-1481.58
3	245.81	-1151.67	243.901	-1477.73
3.03	245.932	-1081.43	244.054	-1463.13
3.07	246.024	-1001.52	244.177	-1438.83
3.1	246.116	-910.724	244.316	-1405.47
3.13	246.208	-809.959	244.439	-1365.95
3.17	246.285	-699.991	244.577	-1325.52
3.2	246.393	-581.894	244.715	-1279.54
3.23	246.53	-457.049	244.854	-1223.73
3.27	246.623	-332.051	244.992	-1157
3.3	246.699	-228.218	245.131	-1080.43
3.33	246.791	-156.9	245.269	-994.33
3.37	246.929	-113.189	245.377	-899.617
3.4	247.037	-87.8823	245.469	-796.294
3.43	247.19	-74.0788	245.561	-684.515
3.47	247.297	-67.177	245.684	-566.124
3.5	247.389	-64.263	245.822	-448.655
3.53	247.481	-63.8028	245.93	-347.331
3.57	247.558	-64.5697	246.069	-270.608
3.6	247.65	-66.4102	246.253	-216.64
3.63	247.773	-68.8641	246.376	-180.046
3.67	247.85	-67.0237	246.499	-155.138
3.7	247.895	-62.4225	246.637	-137.764
3.73	247.988	-59.2017	246.76	-119.006
3.77	248.08	-56.7477	246.883	-102.708
3.8	248.202	-54.2938	247.006	-90.7151
3.83	248.31	-52.4533	247.129	-82.5661
3.87	248.417	-51.2263	247.237	-75.9547
3.9	248.494	-50.4595	247.329	-71.0345
3.93	248.57	-49.846	247.437	-67.6519
3.97	248.662	-49.2325	247.56	-65.4994
4	248.724	-49.5392	247.668	-64.2693
4.03	248.831	-49.6926	247.76	-63.6543
4.07	248.939	-49.6926	247.837	-63.1931
4.1	249.015	-49.3859	247.944	-62.8855
4.13	249.077	-49.0791	248.037	-62.578
4.17	249.168	-48.9257	248.144	-62.1168
4.2	249.199	-48.619	248.237	-61.6555
4.23	249.23	-48.1589	248.344	-61.0405
4.27	249.322	-47.5454	248.436	-60.5792
4.3	249.445	-47.0853	248.529	-59.9642
4.33	249.567	-46.7785	248.621	-59.3492
4.37	249.644	-46.4718	248.744	-58.8879
4.4	249.69	-46.165	248.836	-58.2729
4.43	249.797	-45.7049	248.944	-57.8117
4.47	249.905	-45.3982	249.036	-57.1966
4.5	249.997	-45.0914	249.128	-56.7354
4.53	250.058	-44.6313	249.205	-56.1204
4.57	250.104	-44.3246	249.313	-55.5053
4.6	250.181	-43.8645	249.39	-55.0441
4.63	250.227	-43.4043	249.466	-54.4291
4.67	250.304	-42.7909	249.543	-53.9678
4.7	250.38	-42.4841	249.605	-53.3528
4.73	250.441	-42.024	249.697	-52.584
4.77	250.503	-41.5639	249.805	-51.969
4.8	250.534	-41.2571	249.912	-51.354
4.83	250.595	-40.797	250.005	-50.5852
4.87	250.656	-40.3369	250.082	-49.9702
4.9	250.702	-39.8768	250.128	-49.3552
4.93	250.779	-39.4167	250.174	-48.5864
4.97	250.84	-38.9565	250.235	-47.9714
5	250.871	-38.4964	250.297	-47.2026
5.03	250.932	-37.8829	250.343	-46.5876
5.07	250.978	-37.2695	250.42	-45.9726
5.1	251.07	-36.656	250.466	-45.2038
5.13	251.132	-36.1958	250.512	-44.5888
5.17	251.178	-35.7357	250.589	-43.9738
5.2	251.224	-35.2756	250.681	-43.3587
5.23	251.27	-34.8155	250.758	-42.7437
5.27	251.3	-34.202	250.835	-42.1287
5.3	251.316	-33.7419	250.881	-41.5137
5.33	251.316	-32.975	250.927	-40.8987
5.37	251.408	-32.3615	251.004	-40.4374
5.4	251.5	-31.9014	251.05	-39.6686
5.43	251.561	-31.4413	251.112	-39.0536
5.47	251.592	-30.9812	251.204	-38.5924
5.5	251.623	-30.5211	251.265	-37.9773
5.53	251.638	-29.9076	251.296	-37.3623
5.57	251.684	-29.1407	251.358	-36.7473
5.6	251.745	-28.5272	251.404	-36.1323
5.63	251.745	-27.7604	251.45	-35.5173
5.67	251.806	-27.3003	251.511	-34.9022
5.7	251.852	-26.6868	251.573	-34.2872
5.73	251.914	-26.2267	251.604	-33.826
5.77	251.96	-25.7665	251.634	-33.2109
5.8	252.006	-25.4598	251.681	-32.7497
5.83	252.037	-25.153	251.757	-32.1347
5.87	252.067	-24.8463	251.819	-31.6734
5.9	252.129	-24.5396	251.85	-31.2121
5.93	252.159	-24.2328	251.865	-30.7509
5.97	252.205	-23.9261	251.896	-30.2896
6	252.251	-23.6193	251.927	-29.6746
6.03	252.297	-23.466	251.957	-29.0596
6.07	252.343	-23.3126	252.003	-28.4446
6.1	252.374	-23.0058	252.05	-27.9833
6.13	252.389	-22.6991	252.096	-27.522
6.17	252.359	-22.3923	252.126	-27.2145
6.2	252.297	-21.7789	252.157	-26.7533
6.23	252.297	-21.1654	252.219	-26.4458
6.27	252.359	-20.7053	252.296	-26.1382
6.3	252.405	-20.2451	252.357	-25.8307
6.33	252.451	-19.785	252.388	-25.3695
6.37	252.466	-19.3249	252.419	-25.062
6.4	252.481	-18.7114	252.449	-24.6007
6.43	252.558	-18.4047	252.511	-24.2932
6.47	252.604	-18.2513	252.572	-23.9857
6.5	252.604	-17.9446	252.603	-23.5244
6.53	252.635	-17.6378	252.634	-23.2169
6.57	252.665	-17.3311	252.649	-22.9094
6.6	252.665	-17.0243	252.68	-22.7556
6.63	252.711	-16.5642	252.711	-22.4481
6.67	252.757	-16.2575	252.742	-21.9869
6.7	252.788	-15.9507	252.742	-21.6794
6.73	252.803	-15.644	252.772	-21.3719
6.77	252.819	-15.4906	252.788	-20.9106
6.8	252.819	-15.1839	252.818	-20.6031
6.83	252.803	-14.7237	252.849	-20.2956
6.87	252.849	-14.417	252.911	-19.9881
6.9	252.88	-14.1102	252.957	-19.8343
6.93	252.895	-13.8035	252.957	-19.5268
6.97	252.911	-13.4968	252.972	-19.2193
7	252.926	-13.0366	253.003	-18.9118
7.03	252.957	-12.7299	253.034	-18.758
7.07	252.972	-12.5765	253.08	-18.4505
7.1	252.988	-12.2698	253.141	-18.2968
7.13	252.988	-12.1164	253.157	-17.9893
7.17	253.003	-11.8097	253.172	-17.8355
7.2	253.064	-11.6563	253.172	-17.6818
7.23	253.11	-11.6563	253.187	-17.3742
7.27	253.156	-11.5029	253.203	-17.0667
7.3	253.187	-11.6563	253.233	-16.7592
7.33	253.233	-11.8097	253.264	-16.4517
7.37	253.294	-11.963	253.28	-15.9905
7.4	253.248	-12.1164	253.31	-15.6829
7.43	253.187	-12.1164	253.326	-15.3754
7.47	253.202	-12.1164	253.357	-15.0679
7.5	253.248	-11.963	253.357	-14.6067
7.53	253.31	-11.8097	253.372	-14.1454
7.57	253.356	-11.6563	253.372	-13.8379
7.6	253.386	-11.6563	253.387	-13.5304
7.63	253.386	-11.5029	253.387	-13.0691
7.67	253.402	-11.5029	253.372	-12.7616
7.7	253.417	-11.3495	253.372	-12.3004
7.73	253.432	-11.1962	253.387	-11.8391
7.77	253.417	-11.0428	253.403	-11.5316
7.8	253.402	-11.0428	253.433	-11.2241
7.83	253.386	-10.7361	253.433	-10.9166
7.87	253.386	-10.4293	253.433	-10.6091
7.9	253.402	-10.2759	253.449	-10.3015
7.93	253.432	-9.9692	253.48	-9.994
7.97	253.432	-9.8158	253.51	-9.6865
8	253.463	-9.6625	253.51	-9.379
8.03	253.463	-9.5091	253.495	-9.0715
8.07	253.494	-9.3557	253.495	-8.6102
8.1	253.509	-9.2023	253.495	-8.3027
8.13	253.494	-9.049	253.495	-7.8415
8.17	253.494	-8.5888	253.51	-7.3802
8.2	253.54	-8.4355	253.526	-7.0727
8.23	253.601	-8.2821	253.541	-6.7652
8.27	253.616	-8.2821	253.556	-6.4577
8.3	253.57	-7.9754	253.572	-6.3039
8.33	253.54	-7.6686	253.602	-5.9964
8.37	253.524	-7.2085	253.649	-5.8427
8.4	253.509	-6.9018	253.664	-5.8427
8.43	253.494	-6.4416	253.679	-5.8427
8.47	253.524	-5.9815	253.695	-5.8427
8.5	253.524	-5.5214	253.71	-5.8427
8.53	253.555	-5.0613	253.726	-5.8427
8.57	253.586	-4.9079	253.741	-5.8427
8.6	253.616	-4.7545	253.772	-5.8427
8.63	253.647	-4.6012	253.787	-5.9964
8.67	253.647	-4.6012	253.802	-5.9964
8.7	253.616	-4.6012	253.802	-6.1502
8.73	253.616	-4.4478	253.818	-6.3039
8.77	253.601	-4.1411	253.833	-6.4577
8.8	253.57	-3.8343	253.849	-6.6114
8.83	253.57	-3.5276	253.864	-6.7652
8.87	253.601	-3.3742	253.895	-6.9189
8.9	253.616	-3.2208	253.91	-7.0727
8.93	253.647	-3.2208	253.941	-7.3802
8.97	253.662	-3.2208	253.941	-7.534
9	253.647	-3.2208	253.941	-7.534
9.03	253.632	-3.2208	253.925	-7.534
9.07	253.616	-3.0674	253.91	-7.534
9.1	253.586	-2.9141	253.895	-7.3802
9.13	253.586	-2.7607	253.895	-7.2265
9.17	253.616	-2.6073	253.91	-7.2265
9.2	253.616	-2.3006	253.925	-7.0727
9.23	253.647	-2.1472	253.925	-6.9189
9.27	253.693	-2.1472	253.941	-6.9189
9.3	253.739	-2.1472	253.941	-6.7652
9.33	253.739	-2.3006	253.941	-6.6114
9.37	253.724	-2.3006	253.941	-6.4577
9.4	253.693	-2.3006	253.925	-6.1502
9.43	253.693	-2.3006	253.925	-5.8427
9.47	253.693	-2.1472	253.925	-5.5352
9.5	253.693	-2.1472	253.941	-5.2276
9.53	253.678	-2.1472	253.956	-4.9201
9.57	253.693	-2.1472	253.956	-4.6126
9.6	253.708	-2.3006	253.971	-4.3051
9.63	253.739	-2.454	253.987	-3.9976
9.67	253.754	-2.454	253.987	-3.8439
9.7	253.739	-2.454	253.971	-3.5364
9.73	253.754	-2.454	253.971	-3.2288
9.77	253.754	-2.3006	253.971	-3.0751
9.8	253.739	-2.3006	253.987	-2.9213
9.83	253.739	-2.1472	253.971	-2.6138
9.87	253.724	-2.1472	253.971	-2.4601
9.9	253.724	-1.9938	253.987	-2.1526
9.93	253.693	-1.9938	254.002	-2.1526
9.97	253.678	-1.9938	254.018	-1.9988
10	253.739	-1.9938	254.002	-1.8451
10.03	253.739	-1.9938	254.002	-1.6913
10.07	253.754	-1.9938	254.018	-1.6913
10.1	253.77	-2.1472	254.048	-1.6913
10.13	253.77	-1.9938	254.064	-1.6913
10.17	253.77	-1.9938	254.064	-1.6913
10.2	253.754	-1.8405	254.033	-1.6913
10.23	253.754	-1.8405	254.048	-1.6913
10.27	253.754	-1.8405	254.048	-1.8451
10.3	253.754	-1.8405	254.064	-1.9988
10.33	253.754	-1.6871	254.064	-1.9988
10.37	253.77	-1.6871	254.079	-2.1526
10.4	253.754	-1.5337	254.064	-2.1526
10.43	253.754	-1.3804	254.064	-2.1526
10.47	253.724	-1.227	254.064	-2.1526
10.5	253.693	-0.9202	254.064	-2.1526
10.53	253.693	-0.6135	254.064	-2.1526
10.57	253.708	-0.4601	254.064	-1.9988
10.6	253.739	-0.4601	254.079	-2.1526
10.63	253.739	-0.4601	254.079	-2.1526
10.67	253.754	-0.4601	254.079	-2.1526
10.7	253.8	-0.6135	254.095	-2.1526
10.73	253.8	-0.6135	254.095	-1.9988
10.77	253.816	-0.7669	254.095	-1.9988
10.8	253.785	-0.7669	254.079	-1.8451
10.83	253.754	-0.6135	254.064	-1.8451
10.87	253.724	-0.4601	254.079	-1.6913
10.9	253.708	-0.3067	254.095	-1.6913
10.93	253.708	-0.1534	254.095	-1.6913
10.97	253.708	-0.1534	254.095	-1.6913
11	253.724	0	254.095	-1.6913
11.03	253.708	0	254.064	-1.5375
11.07	253.693	0	254.079	-1.3838
11.1	253.708	0.1534	254.079	-1.3838
11.13	253.724	0.1534	254.079	-1.23
11.17	253.739	0.1534	254.079	-1.0763
11.2	253.77	0.1534	254.064	-0.9225
11.23	253.754	0.1534	254.064	-0.7688
11.27	253.693	0.3067	254.095	-0.7688
11.3	253.678	0.4601	254.11	-0.7688
11.33	253.693	0.6135	254.11	-0.615
11.37	253.724	0.6135	254.125	-0.615
11.4	253.739	0.6135	254.125	-0.615
11.43	253.754	0.4601	254.141	-0.7688
11.47	253.739	0.4601	254.141	-0.7688
11.5	253.724	0.4601	254.141	-0.9225
11.53	253.739	0.4601	254.156	-0.9225
11.57	253.708	0.4601	254.141	-0.9225
11.6	253.693	0.4601	254.125	-0.9225
11.63	253.708	0.4601	254.11	-0.9225
11.67	253.739	0.4601	254.095	-0.7688
11.7	253.739	0.3067	254.095	-0.7688
11.73	253.739	0.3067	254.095	-0.7688
11.77	253.693	0.3067	254.11	-0.7688
11.8	253.708	0.3067	254.11	-0.7688
11.83	253.754	0.3067	254.11	-0.615
11.87	253.754	0.4601	254.125	-0.615
11.9	253.754	0.4601	254.125	-0.615
11.93	253.693	0.4601	254.141	-0.615
11.97	253.678	0.6135	254.141	-0.615
12	253.632	0.6135	254.141	-0.7688
12.03	253.647	0.6135	254.125	-0.7688
12.07	253.662	0.6135	254.11	-0.7688
12.1	253.678	0.6135	254.11	-0.7688
12.13	253.662	0.4601	254.125	-0.615
12.17	253.632	0.6135	254.141	-0.615
12.2	253.647	0.6135	254.141	-0.615
12.23	253.662	0.7669	254.141	-0.615
12.27	253.678	0.7669	254.125	-0.615
12.3	253.708	0.7669	254.125	-0.615
12.33	253.724	0.7669	254.11	-0.615
12.37	253.708	0.7669	254.095	-0.4613
12.4	253.647	0.9202	254.079	-0.3075
12.43	253.647	0.9202	254.079	-0.1538
12.47	253.647	1.0736	254.064	0
12.5	253.662	1.0736	254.048	0.1538
12.53	253.647	1.0736	254.064	0.3075
12.57	253.616	1.0736	254.048	0.615
12.6	253.586	1.227	254.064	0.615
12.63	253.601	1.3804	254.048	0.7688
12.67	253.616	1.5337	254.048	0.9225
12.7	253.57	1.6871	254.033	1.0763
12.73	253.478	1.9938	254.033	1.0763
12.77	253.402	2.3006	254.018	1.23
12.8	253.294	2.9141	254.018	1.23
12.83	253.11	3.6809	254.018	1.3838
12.87	252.957	4.7545	254.048	1.3838
12.9	252.788	6.1349	254.079	1.23
12.93	252.604	7.822	254.079	1.23
12.97	252.42	9.6625	254.079	1.23
13	252.236	11.6563	254.079	1.23
13.03	252.083	13.8035	254.079	1.23
13.07	251.914	16.1041	254.064	1.23
13.1	251.745	18.558	254.048	1.23
13.13	251.53	21.3187	254.048	1.3838
13.17					0
13.17	251.392	23.9261	254.033	1.3838	500
13.2	251.316	26.5334	253.925	1.5375
13.23	251.208	29.1407	253.833	1.8451
13.27	251.101	31.7481	253.756	2.3063
13.3	250.978	34.3554	253.664	2.9213
13.33	250.871	36.9627	253.541	3.6901
13.37	250.687	39.7234	253.433	4.6126
13.4	250.488	42.4841	253.31	5.6889
13.43	250.319	45.2448	253.203	6.9189
13.47	250.181	48.0055	253.08	8.3027
13.5	250.058	50.6128	252.957	9.6865
13.53	249.905	53.2202	252.803	11.3778
13.57	249.767	55.6741	252.634	13.2229
13.6	249.598	58.1281	252.495	15.0679
13.63	249.353	60.4287	252.403	17.0667
13.67	249.184	62.7292	252.342	18.9118
13.7	249.046	64.8765	252.265	20.9106
13.73	248.877	66.8703	252.142	22.9094
13.77	248.678	69.0175	252.034	24.9082
13.8	248.54	70.7046	251.927	27.0608
13.83	248.417	72.2383	251.804	29.2133
13.87	248.264	73.6187	251.711	31.2121
13.9	248.08	74.8456	251.681	33.2109
13.93	247.911	75.9193	251.619	34.9022
13.97	247.742	76.6861	251.558	36.5935
14	247.573	77.2996	251.465	38.2848
14.03	247.389	77.7597	251.388	39.8224
14.07	247.205	78.0665	251.296	41.3599
14.1	247.037	78.2198	251.235	42.59
14.13	246.914	78.3732	251.142	43.9738
14.17	246.73	78.3732	251.065	45.05
14.2	246.561	78.5266	250.973	45.9726
14.23	246.393	78.8333	250.896	46.7413
14.27	246.239	78.9867	250.82	47.3564
14.3	246.07	79.2934	250.712	47.9714
14.33	245.84	79.7536	250.635	48.2789
14.37	245.641	80.2137	250.512	48.4326
14.4	245.457	80.8272	250.42	48.5864
14.43	245.257	81.4407	250.327	48.4326
14.47	245.089	82.2075	250.251	48.2789
14.5	244.92	82.9744	250.143	47.8176
14.53	244.736	83.5879	250.035	47.5101
14.57	244.552	84.048	249.928	47.2026
14.6	244.383	84.5081	249.851	46.7413
14.63	244.199	84.9682	249.759	46.2801
14.67	244	85.275	249.666	45.8188
14.7	243.846	85.5817	249.589	45.5113
14.73	243.708	85.8884	249.497	45.05
14.77	243.57	86.0418	249.42	44.7425
14.8	243.417	86.1952	249.344	44.2813
14.83	243.233	86.3486	249.267	43.9738
14.87	243.018	86.3486	249.19	43.82
14.9	242.85	86.5019	249.082	43.6662
14.93	242.712	86.5019	248.99	43.82
14.97	242.573	86.5019	248.913	43.82
15	242.42	86.5019	248.821	43.82
15.03	242.236	86.5019	248.713	43.82
15.07	242.021	86.6553	248.621	43.82
15.1	241.868	86.8087	248.559	43.9738
15.13	241.761	86.6553	248.482	43.9738
15.17	241.638	86.5019	248.406	44.1275
15.2	241.439	86.1952	248.329	44.2813
15.23	241.208	86.1952	248.237	44.2813
15.27	240.994	86.0418	248.16	44.2813
15.3	240.779	86.1952	248.067	44.2813
15.33	240.656	86.0418	247.975	44.2813
15.37	240.549	85.8884	247.867	44.2813
15.4	240.365	85.8884	247.791	44.1275
15.43	240.196	85.7351	247.698	44.1275
15.47	240.012	85.5817	247.606	44.1275
15.5	239.874	85.275	247.514	43.9738
15.53	239.721	85.1216	247.406	43.9738
15.57	239.552	84.8148	247.299	43.9738
15.6	239.368	84.5081	247.222	43.82
15.63	239.169	84.3547	247.129	43.82
15.67	239	84.2014	247.006	43.82
15.7	238.785	84.2014	246.899	43.9738
15.73	238.662	84.048	246.806	44.1275
15.77	238.509	84.048	246.73	44.1275
15.8	238.294	84.048	246.684	44.1275
15.83	238.141	84.2014	246.607	44.1275
15.87	237.926	84.2014	246.499	44.1275
15.9	237.589	84.6615	246.376	44.435
15.93	237.175	85.5817	246.253	44.5888
15.97	236.791	86.8087	246.13	44.8963
16						0
16	236.5	88.3424	246.022	45.2038		500
16.03	236.239	89.8761	245.853	45.5113
16.07	236.04	91.4098	245.638	46.2801
16.1	235.794	92.9436	245.407	47.0488
16.13	235.534	94.3239	245.177	48.1251
16.17	235.319	95.8576	244.962	49.3552
16.2	235.074	97.5447	244.746	50.5852
16.23	234.798	99.2318	244.577	52.1227
16.27	234.476	101.072	244.393	53.5065
16.3	234.23	102.913	244.208	55.1978
16.33	233.969	104.6	244.07	56.7354
16.37	233.709	106.44	243.87	58.4267
16.4	233.463	108.281	243.685	60.118
16.43	233.172	110.121	243.516	61.8093
16.47	232.911	111.808	243.332	63.6543
16.5	232.65	113.495	243.147	65.3456
16.53	232.359	115.183	242.917	67.1907
16.57	232.129	116.87	242.732	69.0357
16.6	231.853	118.71	242.532	70.727
16.63	231.577	120.551	242.363	72.5721
16.67	231.316	122.238	242.194	74.2634
16.7	230.994	123.771	242.025	75.9547
16.73	230.672	125.459	241.84	77.646
16.77	230.38	127.146	241.656	79.1835
16.8	230.058	128.679	241.456	80.7211
16.83	229.752	130.213	241.287	82.2586
16.87	229.445	131.593	241.118	83.6424
16.9	229.169	132.974	240.948	85.0262
16.93	228.908	134.047	240.764	86.2562
16.97	228.663	135.121	240.579	87.3325
17	228.387	135.888	240.395	88.4088
17.03	228.08	136.808	240.226	89.4851
17.07	227.758	137.422	240.041	90.2538
17.1	227.451	137.882	239.826	91.1764
17.13	227.129	138.342	239.611	91.7914
17.17	226.838	138.495	239.411	92.2526
17.2	226.531	138.649	239.242	92.5601
17.23	226.255	138.955	239.073	92.7139
17.27	225.963	139.415	238.904	92.7139
17.3	225.687	140.029	238.734	92.5601
17.33	225.411	140.796	238.565	92.4064
17.37	225.104	141.409	238.396	91.9451
17.4	224.798	142.176	238.212	91.6376
17.43	224.522	142.636	238.042	91.4839
17.47	224.261	143.096	237.858	91.3301
17.5	224	143.403	237.658	91.3301
17.53	223.724	143.556	237.474	91.3301
17.57	223.433	143.863	237.304	91.1764
17.6	223.157	144.17	237.12	91.1764
17.63	222.865	144.323	236.92	91.1764
17.67	222.604	144.477	236.72	91.1764
17.7	222.359	144.477	236.551	91.1764
17.73	222.129	144.323	236.397	91.0226
17.77	221.853	144.17	236.228	90.8688
17.8	221.577	143.863	236.059	90.7151
17.83	221.301	143.71	235.875	90.5613
17.87	221.025	143.403	235.675	90.5613
17.9	220.749	142.943	235.459	90.7151
17.93	220.488	142.483	235.275	90.7151
17.97	220.196	142.023	235.106	90.7151
18	219.874	141.716	234.937	90.7151
18.03	219.537	141.409	234.737	90.8688
18.07	219.261	141.256	234.552	90.8688
18.1	218.97	140.949	234.368	90.8688
18.13	218.694	140.796	234.183	90.8688
18.17	218.417	140.796	233.999	90.8688
18.2	218.141	140.642	233.784	91.0226
18.23	217.865	140.642	233.599	91.0226
18.27	217.574	140.489	233.415	91.1764
18.3	217.267	140.336	233.23	91.1764
18.33	216.991	140.182	233.046	91.3301
18.37	216.73	139.875	232.846	91.3301
18.4	216.423	139.875	232.692	91.3301
18.43	216.055	140.029	232.507	91.3301
18.47	215.749	140.182	232.338	91.4839
18.5	215.473	140.489	232.185	91.6376
18.53	215.181	140.796	232	91.6376
18.57	214.859	141.102	231.831	91.6376
18.6	214.552	141.409	231.646	91.7914
18.63							0
18.63	214.338	141.716	231.462	91.7914			500
18.67	214.108	141.869	231.277	91.6376
18.7	213.786	142.176	231.154	91.4839
18.73	213.371	142.636	231.077	91.1764
18.77	212.881	143.556	230.97	90.7151
18.8	212.359	144.783	230.785	90.2538
18.83	211.838	146.47	230.585	89.9463
18.87	211.301	148.464	230.416	89.4851
18.9	210.779	150.765	230.216	89.1775
18.93	210.243	153.372	230.017	88.87
18.97	209.69	156.44	229.801	88.7163
19	209.138	159.661	229.601	88.5625
19.03	208.586	163.188	229.386	88.5625
19.07	208.049	166.869	229.171	88.5625
19.1	207.513	170.703	228.925	88.5625
19.13	206.945	174.691	228.694	88.7163
19.17	206.393	178.832	228.433	89.0238
19.2	205.856	183.28	228.172	89.4851
19.23	205.273	187.728	227.941	90.1001
19.27	204.66	192.482	227.679	90.7151
19.3	204.108	197.237	227.464	91.4839
19.33	203.571	201.991	227.218	92.2526
19.37	203.049	206.899	226.972	93.0214
19.4	202.513	211.807	226.726	94.0977
19.43	201.991	216.715	226.511	95.0202
19.47	201.408	221.623	226.265	96.0965
19.5	200.795	226.377	226.019	97.1728
19.53	200.258	231.132	225.773	98.4028
19.57	199.721	235.733	225.512	99.6328
19.6	199.123	240.181	225.266	101.017
19.63	198.54	244.629	225.019	102.4
19.67	197.973	248.923	224.774	103.784
19.7	197.375	253.064	224.497	105.322
19.73	196.869	256.745	224.235	106.859
19.77	196.332	260.426	224.005	108.397
19.8	195.78	263.8	223.79	109.781
19.83	195.227	266.868	223.574	111.011
19.87	194.691	269.475	223.344	112.394
19.9	194.169	271.929	223.144	113.471
19.93	193.617	273.923	222.944	114.547
19.97	193.05	275.303	222.713	115.623
20	192.421	276.377	222.452	116.7
20.03	191.853	277.144	222.221	117.468
20.07	191.301	277.604	221.96	118.237
20.1	190.734	277.911	221.698	118.698
20.13	190.136	278.371	221.422	119.16
20.17	189.614	278.677	221.191	119.621
20.2	189.062	278.831	220.945	119.775
20.23	188.541	278.831	220.714	120.082
20.27	188.019	278.831	220.484	120.236
20.3	187.467	278.831	220.238	120.236
20.33	186.899	278.831	220.007	120.39
20.37	186.286	278.984	219.776	120.236
20.4	185.734	278.984	219.53	120.236
20.43	185.151	278.984	219.285	120.082
20.47	184.568	279.137	218.992	120.082
20.5	184.016	279.137	218.669	120.236
20.53	183.479	279.137	218.377	120.543
20.57	182.927	279.137	218.162	120.851
20.6	182.344	279.291	217.962	121.005
20.63	181.807	279.444	217.793	121.005
20.67	181.271	279.444	217.578	121.005
20.7	180.719	279.444	217.363	120.851
20.73	180.151	279.444	217.117	120.697
20.77	179.614	279.291	216.901	120.543
20.8	179.016	279.137	216.655	120.543
20.83	178.464	279.137	216.394	120.39
20.87	177.896	279.137	216.148	120.236
20.9	177.298	279.291	215.917	120.236
20.93	176.762	279.291	215.671	120.236
20.97	176.209	279.444	215.41	120.236
21	175.642	279.444	215.164	120.236
21.03	174.998	279.904	214.949	120.39
21.07	174.4	280.211	214.718	120.543
21.1	173.817	280.518	214.457	120.543
21.13	173.219	280.825	214.226	120.697
21.17	172.697	281.131	213.98	120.697
21.2	172.176	281.285	213.765	120.697
21.23	171.685	281.285	213.534	120.543
21.27	171.163	281.131	213.319	120.39
21.3	170.642	280.825	213.088	120.082
21.33	170.105	280.671	212.827	119.775
21.37	169.568	280.518	212.581	119.621
21.4	169.031	280.364	212.319	119.467
21.43	168.479	280.058	212.089	119.313
21.47	167.881	280.058	211.843	119.313
21.5	167.36	279.904	211.612	119.313
21.53	166.792	279.751	211.381	119.16
21.57	166.24	279.598	211.12	119.16
21.6	165.673	279.291	210.874	119.16
21.63	165.151	278.831	210.659	119.006
21.67	164.63	278.524	210.428	118.852
21.7	164.047	278.217	210.213	118.698
21.73	163.48	277.911	209.982	118.545
21.77	162.897	277.911	209.752	118.391
21.8	162.406	277.604	209.521	118.237
21.83	161.869	277.45	209.244	118.391
21.87	161.302	277.144	208.998	118.698
21.9	160.703	276.99	208.768	118.852
21.93	160.136	276.837	208.553	119.006
21.97	159.584	276.683	208.322	119.006
22	159.047	276.53	208.091	119.006
22.03	158.525	276.223	207.861	118.852
22.07	157.973	275.917	207.645	118.698
22.1	157.437	275.61	207.399	118.545
22.13	156.808	275.457	207.169	118.391
22.17	156.21	275.457	206.923	118.237
22.2	155.75	275.303	206.677	118.237
22.23	155.274	274.996	206.4	118.237
22.27	154.768	274.69	206.123	118.237
22.3	154.231	274.229	205.908	118.391
22.33	153.664	273.923	205.693	118.391
22.37	153.081	273.923	205.508	118.391
22.4	152.636	273.769	205.293	118.237
22.43	152.176	273.463	205.078	118.083
22.47								0
22.47	151.716	273.309	204.847	117.93				500
22.5	151.21	272.849	204.601	117.93
22.53	150.657	272.542	204.401	117.622
22.57	150.09	272.082	204.263	117.315
22.6	149.492	271.776	204.109	116.7
22.63	148.924	271.469	203.894	116.238
22.67	148.357	271.162	203.617	115.777
22.7	147.835	270.855	203.325	115.469
22.73	147.314	270.395	203.002	115.469
22.77	146.762	270.089	202.694	115.469
22.8	146.194	269.782	202.371	115.777
22.83	145.581	269.782	202.033	116.238
22.87	145.029	269.628	201.695	116.853
22.9	144.461	269.628	201.341	117.622
22.93	143.909	269.628	200.988	118.698
22.97	143.342	269.782	200.68	119.775
23	142.759	269.782	200.311	121.005
23.03	142.145	270.089	199.911	122.542
23.07	141.532	270.549	199.542	124.08
23.1	140.964	271.009	199.204	125.771
23.13	140.366	271.469	198.881	127.616
23.17	139.783	272.082	198.543	129.461
23.2	139.231	272.696	198.189	131.46
23.23	138.649	273.309	197.836	133.613
23.27	138.035	274.229	197.482	135.765
23.3	137.437	275.15	197.098	137.918
23.33	136.869	276.07	196.713	140.224
23.37	136.287	276.99	196.36	142.684
23.4	135.719	277.911	196.006	144.99
23.43	135.136	278.831	195.699	147.297
23.47	134.523	280.058	195.376	149.449
23.5	133.925	281.438	195.053	151.602
23.53	133.327	282.665	194.699	153.908
23.57	132.744	283.739	194.33	156.061
23.6	132.176	284.812	193.93	158.521
23.63	131.624	285.733	193.577	160.827
23.67	131.011	286.653	193.238	162.98
23.7	130.412	287.726	192.916	164.978
23.73	129.784	288.8	192.593	166.823
23.77	129.201	289.567	192.255	168.361
23.8	128.541	290.334	191.932	169.899
23.83	127.928	290.947	191.593	171.129
23.87	127.314	291.561	191.24	172.359
23.9	126.716	292.327	190.855	173.281
23.93	126.118	292.941	190.532	173.743
23.97	125.535	293.554	190.21	174.05
24	124.952	294.168	189.887	174.05
24.03	124.37	294.781	189.518	174.05
24.07	123.756	295.241	189.164	174.05
24.1	123.173	295.548	188.81	174.05
24.13	122.59	295.855	188.472	173.896
24.17	122.008	296.162	188.103	173.896
24.2	121.425	296.315	187.734	173.743
24.23	120.842	296.469	187.411	173.589
24.27	120.259	296.622	187.073	173.589
24.3	119.63	296.775	186.719	173.281
24.33	119.063	296.775	186.381	173.127
24.37	118.495	296.775	186.043	173.127
24.4	117.943	296.775	185.705	172.974
24.43	117.391	296.775	185.382	172.974
24.47	116.808	296.622	185.028	172.82
24.5	116.195	296.622	184.644	172.666
24.53	115.597	296.469	184.305	172.512
24.57	115.029	296.315	183.967	172.512
24.6	114.462	296.162	183.629	172.359
24.63	113.879	296.008	183.275	172.359
24.67	113.296	295.702	182.922	172.359
24.7	112.698	295.548	182.583	172.512
24.73	112.1	295.241	182.261	172.512
24.77	111.517	295.088	181.891	172.512
24.8	110.934	294.781	181.538	172.512
24.83	110.382	294.475	181.215	172.512
24.87	109.799	294.168	180.892	172.359
24.9	109.201	293.861	180.569	172.359
24.93	108.588	293.708	180.246	172.205
24.97	108.02	293.248	179.908	172.205
25	107.453	292.941	179.554	172.205
25.03	106.885	292.481	179.216	172.205
25.07	106.318	292.174	178.832	172.205
25.1	105.75	291.714	178.478	172.205
25.13	105.137	291.407	178.14	172.051
25.17	104.569	291.254	177.832	171.897
25.2	104.017	291.101	177.509	171.744
25.23	103.434	290.947	177.171	171.744
25.27	102.836	290.794	176.833	171.59
25.3	102.253	290.794	176.51	171.436
25.33	101.67	290.64	176.172	171.129
25.37	101.103	290.487	175.833	170.975
25.4	100.551	290.334	175.449	170.821
25.43	99.9834	290.18	175.095	170.667
25.47	99.3852	290.18	174.742	170.667
25.5	98.8024	290.027	174.404	170.667
25.53	98.2196	290.027	174.05	170.667
25.57	97.6521	289.873	173.681	170.821
25.6	97.1153	289.72	173.358	170.821
25.63	96.5938	289.567	173.051	170.821
25.67	96.0877	289.26	172.712	170.667

## Sheet: 3 mg.ml primary data n=1
Time [min]	1A: O2 Concentration [nmol/ml]	1A: O2 Slope uncorr. [pmol/(s*ml)]	1B: O2 Concentration [nmol/ml]	1B: O2 Slope uncorr. [pmol/(s*ml)]	mitos	NADH	ADP	cyt c
0	250.34		246.754
0.03	250.418		246.8
0.07	250.449		246.863
0.1	250.495		246.894
0.13	250.542	-24.11	246.925	-21.7172
0.17	250.604	-23.3323	246.956	-18.6147
0.2	250.635	-24.11	247.002	-17.0635
0.23	250.682	-23.3323	247.033	-17.8391
0.27	250.744	-24.11	247.064	-17.8391
0.3	250.775	-23.7989	247.095	-18.6147
0.33	250.806	-22.7101	247.111	-17.0635
0.37	250.838	-22.0879	247.111	-15.0469
0.4	250.853	-20.5324	247.142	-13.9611
0.43	250.869	-18.5103	247.188	-13.6508
0.47	250.9	-20.0658	247.235	-15.8225
0.5	250.915	-18.6658	247.266	-15.3572
0.53	250.915	-17.2659	247.312	-15.202
0.57	250.931	-15.5549	247.343	-15.3572
0.6	250.946	-13.9994	247.375	-15.5123
0.63	250.962	-16.177	247.421	-16.2879
0.67	250.978	-14.9327	247.468	-16.2879
0.7	250.993	-13.8438	247.499	-16.2879
0.73	251.024	-12.755	247.53	-16.5981
0.77	251.086	-12.1328	247.545	-16.5981
0.8	251.133	-14.466	247.576	-16.7533
0.83	251.133	-13.6883	247.592	-16.443
0.87	251.133	-13.0661	247.607	-16.1328
0.9	251.164	-12.5994	247.638	-16.1328
0.93	251.211	-12.1328	247.654	-15.9777
0.97	251.242	-13.6883	247.669	-15.9777
1	251.257	-13.2216	247.685	-15.6674
1.03	251.273	-12.9105	247.731	-15.3572
1.07	251.273	-12.4439	247.762	-15.202
1.1	251.273	-11.9772	247.778	-15.0469
1.13	251.304	-13.0661	247.809	-15.3572
1.17	251.351	-12.5994	247.824	-15.0469
1.2	251.335	-12.2883	247.855	-14.8918
1.23	251.351	-11.8217	247.886	-14.7367
1.27	251.351	-11.355	247.917	-14.5816
1.3	251.382	-12.2883	247.933	-14.8918
1.33	251.398	-11.9772	247.964	-14.7367
1.37	251.413	-11.5106	247.995	-14.4264
1.4	251.429	-11.1995	248.042	-14.4264
1.43	251.429	-10.8884	248.057	-14.2713
1.47	251.429	-10.4218	248.072	-14.2713
1.5	251.444	-10.1107	248.072	-14.1162
1.53	251.475	-9.9551	248.088	-13.9611
1.57	251.491	-9.644	248.103	-13.8059
1.6	251.537	-9.644	248.135	-13.6508
1.63	251.522	-9.4885	248.15	-13.4957
1.67	251.553	-9.3329	248.166	-13.1854
1.7	251.6	-9.3329	248.181	-13.0303
1.73	251.646	-9.3329	248.197	-12.7201
1.77	251.662	-9.3329	248.212	-12.4098
1.8	251.662	-9.3329	248.212	-12.0996
1.83	251.662	-9.3329	248.212	-11.7893
1.87	251.662	-9.1774	248.243	-11.6342
1.9	251.678	-9.1774	248.259	-11.324
1.93	251.693	-9.0218	248.274	-11.1688
1.97	251.693	-8.8663	248.274	-10.8586
2	251.693	-8.5552	248.29	-10.7035
2.03	251.693	-8.3996	248.321	-10.5484
2.07	251.693	-8.0885	248.336	-10.3932
2.1	251.693	-7.933	248.352	-10.2381
2.13	251.709	-7.7774	248.383	-10.083
2.17	251.74	-7.6219	248.429	-9.9279
2.2	251.755	-7.4663	248.46	-9.9279
2.23	251.771	-7.3108	248.476	-9.7727
2.27	251.786	-7.3108	248.476	-9.7727
2.3	251.802	-7.1552	248.491	-9.6176
2.33	251.833	-7.1552	248.491	-9.3074
2.37	251.817	-7.1552	248.507	-9.3074
2.4	251.786	-6.9997	248.522	-9.1523
2.43	251.786	-6.8441	248.553	-8.9971
2.47	251.802	-6.6886	248.553	-8.842
2.5	251.817	-6.533	248.553	-8.6869
2.53	251.833	-6.3775	248.553	-8.5318
2.57	251.833	-6.2219	248.569	-8.3766
2.6	251.817	-5.9108	248.584	-8.2215
2.63	251.817	-5.7553	248.6	-8.0664
2.67	251.817	-5.4442	248.6	-7.9113
2.7	251.833	-5.2886	248.6	-7.9113
2.73	251.833	-5.1331	248.6	-7.7561
2.77	251.849	-4.822	248.6	-7.601
2.8	251.88	-4.6665	248.615	-7.4459
2.83	251.911	-4.5109	248.647	-7.4459
2.87	251.911	-4.3554	248.631	-7.1357
2.9	251.895	-4.1998	248.631	-6.9805
2.93	251.864	-3.8887	248.6	-6.8254
2.97	251.849	-3.5776	248.6	-6.5152
3	251.864	-3.4221	248.615	-6.36
3.03	251.849	-3.2665	248.615	-6.0498
3.07	251.88	-3.111	248.647	-5.8947
3.1	251.926	-3.111	248.647	-5.7395
3.13	251.911	-3.111	248.678	-5.4293
3.17	251.911	-3.111	248.708	-5.2742
3.2	251.911	-2.9554	248.724	-5.1191
3.23	251.926	-2.9554	248.739	-4.9639
3.27	251.926	-2.9554	248.755	-4.9639
3.3	251.911	-2.7999	248.771	-4.8088
3.33	251.942	-2.7999	248.771	-4.6537
3.37	251.942	-2.6443	248.771	-4.4986
3.4	251.958	-2.6443	248.771	-4.3434
3.43	251.973	-2.4888	248.755	-4.1883
3.47	251.973	-2.4888	248.755	-4.0332
3.5	251.989	-2.4888	248.771	-3.8781
3.53	251.973	-2.4888	248.771	-3.8781
3.57	251.989	-2.4888	248.771	-3.8781
3.6	252.004	-2.4888	248.771	-3.7229
3.63	251.989	-2.6443	248.755	-3.7229
3.67	251.958	-2.6443	248.771	-3.5678
3.7	251.942	-2.4888	248.802	-3.5678
3.73	251.942	-2.4888	248.817	-3.5678
3.77	251.973	-2.3332	248.817	-3.5678
3.8	251.973	-2.3332	248.802	-3.5678
3.83	251.973	-2.1777	248.786	-3.4127
3.87	251.973	-2.1777	248.802	-3.4127
3.9	252.004	-2.1777	248.848	-3.4127
3.93	252.035	-2.1777	248.864	-3.4127
3.97	252.051	-2.1777	248.848	-3.4127
4	252.035	-2.1777	248.833	-3.4127
4.03	252.02	-2.1777	248.833	-3.4127
4.07	252.02	-2.1777	248.848	-3.2576
4.1	252.02	-2.0221	248.879	-3.2576
4.13	251.989	-2.0221	248.879	-3.2576
4.17	251.942	-1.8666	248.864	-3.2576
4.2	251.926	-1.711	248.848	-3.2576
4.23	251.958	-1.711	248.848	-3.1025
4.27	251.973	-1.5555	248.817	-2.9473
4.3	251.989	-1.3999	248.833	-2.6371
4.33	252.004	-1.2444	248.833	-2.482
4.37	251.989	-1.0888	248.864	-2.1717
4.4	251.973	-0.9333	248.879	-2.1717
4.43	251.958	-0.7777	248.895	-2.0166
4.47	251.973	-0.7777	248.91	-2.0166
4.5	251.989	-0.6222	248.926	-2.0166
4.53	251.989	-0.4666	248.926	-2.0166
4.57	251.989	-0.4666	248.941	-2.0166
4.6	252.004	-0.4666	248.926	-2.1717
4.63	252.02	-0.3111	248.926	-2.1717
4.67	251.989	-0.3111	248.91	-2.1717
4.7	251.973	-0.1555	248.91	-2.1717
4.73	251.958	0	248.91	-2.1717
4.77	251.973	0	248.91	-2.1717
4.8	251.958	0	248.941	-2.1717
4.83	251.973	0	248.957	-2.1717
4.87	251.989	0.1555	248.941	-2.1717
4.9	251.973	0.1555	248.926	-2.1717
4.93	251.989	0	248.91	-2.0166
4.97	252.02	0	248.926	-1.8615
5	252.035	0	248.957	-1.8615
5.03	252.02	0	248.957	-1.8615
5.07	252.02	0	248.957	-1.8615
5.1	252.02	0	248.926	-1.8615
5.13	252.004	0	248.926	-1.7064
5.17	251.989	0	248.91	-1.5512
5.2	252.004	0	248.926	-1.3961
5.23	252.004	0	248.926	-1.3961
5.27	252.004	-0.1555	248.941	-1.3961
5.3	251.973	-0.1555	248.941	-1.3961
5.33	251.958	-0.1555	248.926	-1.241
5.37	251.958	-0.1555	248.91	-1.241
5.4	251.958	-0.1555	248.91	-1.0859
5.43	251.942	-0.1555	248.91	-1.0859
5.47	251.958	-0.1555	248.91	-0.9307
5.5	251.926	0	248.895	-0.7756
5.53	251.911	0.3111	248.895	-0.7756
5.57	251.926	0.4666	248.895	-0.6205
5.6	251.942	0.4666	248.91	-0.3102
5.63	251.942	0.4666	248.926	-0.1551
5.67	251.926	0.6222	248.941	-0.1551
5.7	251.942	0.6222	248.957	0
5.73	251.926	0.7777	248.941	0
5.77	251.926	0.7777	248.926	0
5.8	251.926	0.9333	248.926	0.1551
5.83	251.926	0.9333	248.926	0.1551
5.87	251.926	1.0888	248.926	0.1551
5.9	251.911	1.0888	248.957	0
5.93	251.942	1.0888	248.972	-0.1551
5.97	251.926	1.0888	248.941	-0.1551
6	251.942	1.0888	248.941	-0.1551
6.03	251.895	1.2444	248.926	0
6.07	251.849	1.3999	248.957	0
6.1	251.833	1.5555	248.972	-0.1551
6.13	251.849	1.711	248.972	-0.1551
6.17	251.895	1.8666	248.957	-0.3102
6.2	251.88	1.8666	248.957	-0.3102
6.23	251.88	2.0221	248.941	-0.3102
6.27	251.88	2.0221	248.926	-0.3102
6.3	251.864	2.0221	248.91	-0.3102
6.33	251.849	2.0221	248.91	-0.3102
6.37	251.833	2.0221	248.926	-0.3102
6.4	251.817	2.0221	248.926	-0.3102
6.43	251.817	2.0221	248.941	-0.3102
6.47	251.817	2.0221	248.941	-0.3102
6.5	251.786	2.1777	248.926	-0.3102
6.53	251.771	2.1777	248.926	-0.3102
6.57	251.771	2.3332	248.941	-0.3102
6.6	251.802	2.1777	248.941	-0.3102
6.63	251.802	2.1777	248.941	-0.3102
6.67	251.849	2.1777	248.926	-0.3102
6.7	251.864	2.0221	248.941	-0.3102
6.73	251.864	2.0221	248.926	-0.3102
6.77	251.849	1.8666	248.926	-0.1551
6.8	251.802	1.8666	248.926	-0.1551
6.83	251.786	2.0221	248.91	0
6.87	251.786	2.0221	248.895	0.1551
6.9	251.802	2.0221	248.895	0.3102
6.93	251.802	2.0221	248.895	0.4654
6.97	251.802	2.0221	248.91	0.4654
7	251.817	1.8666	248.91	0.4654
7.03	251.817	1.8666	248.91	0.4654
7.07	251.833	1.711	248.879	0.6205
7.1	251.833	1.5555	248.895	0.6205
7.13	251.817	1.5555	248.895	0.7756
7.17	251.802	1.3999	248.895	0.7756
7.2	251.786	1.3999	248.91	0.7756
7.23	251.771	1.3999	248.895	0.7756
7.27	251.771	1.2444	248.879	0.7756
7.3	251.755	1.2444	248.864	0.9307
7.33	251.755	1.0888	248.848	0.9307
7.37	251.771	1.0888	248.864	1.0859
7.4	251.74	1.0888	248.879	1.0859
7.43	251.74	1.2444	248.895	0.9307
7.47	251.755	1.2444	248.91	0.9307
7.5	251.724	1.2444	248.895	0.7756
7.53	251.678	1.3999	248.879	0.7756
7.57	251.646	1.5555	248.879	0.7756
7.6	251.646	1.5555	248.895	0.7756
7.63	251.662	1.711	248.91	0.7756
7.67	251.646	1.8666	248.91	0.7756
7.7	251.678	1.8666	248.879	0.7756
7.73	251.709	2.0221	248.879	0.7756
7.77	251.724	2.0221	248.848	0.7756
7.8	251.74	2.0221	248.848	0.7756
7.83	251.709	2.0221	248.848	0.9307
7.87	251.662	2.1777	248.833	0.9307
7.9	251.646	2.4888	248.833	0.9307
7.93	251.646	2.4888	248.848	0.9307
7.97	251.646	2.6443	248.864	0.9307
8	251.646	2.6443	248.848	0.9307
8.03	251.662	2.6443	248.833	0.9307
8.07	251.662	2.4888	248.802	0.9307
8.1	251.646	2.4888	248.817	0.9307
8.13	251.662	2.4888	248.817	0.9307
8.17	251.646	2.4888	248.833	0.9307
8.2	251.615	2.6443	248.833	1.0859
8.23	251.584	2.6443	248.817	1.0859
8.27	251.569	2.7999	248.817	1.0859
8.3	251.553	2.9554	248.802	1.241
8.33	251.6	2.9554	248.802	1.241
8.37	251.615	2.7999	248.802	1.241
8.4	251.6	2.7999	248.817	1.241
8.43	251.584	2.6443	248.802	1.241
8.47	251.569	2.6443	248.771	1.3961
8.5	251.584	2.4888	248.755	1.5512
8.53	251.584	2.4888	248.724	1.5512
8.57	251.553	2.4888	248.708	1.7064
8.6	251.569	2.3332	248.708	1.8615
8.63	251.584	2.3332	248.708	2.0166
8.67	251.584	2.1777	248.708	2.3268
8.7	251.569	2.1777	248.708	2.482
8.73	251.569	2.0221	248.724	2.482
8.77	251.569	2.0221	248.724	2.482
8.8	251.569	1.8666	248.724	2.482
8.83	251.537	1.8666	248.724	2.482
8.87	251.553	1.8666	248.739	2.482
8.9	251.522	2.0221	248.755	2.482
8.93	251.506	2.1777	248.755	2.3268
8.97	251.506	2.3332	248.739	2.1717
9	251.506	2.3332	248.708	2.1717
9.03	251.475	2.4888	248.693	2.1717
9.07	251.46	2.4888	248.693	2.1717
9.1	251.475	2.4888	248.693	2.1717
9.13	251.444	2.4888	248.708	2.1717
9.17	251.444	2.4888	248.708	2.1717
9.2	251.46	2.4888	248.678	2.1717
9.23	251.46	2.6443	248.678	2.1717
9.27	251.46	2.6443	248.693	2.1717
9.3	251.444	2.6443	248.693	2.0166
9.33	251.429	2.7999	248.693	2.0166
9.37	251.413	2.7999	248.708	1.8615
9.4	251.429	2.7999	248.693	1.8615
9.43	251.444	2.6443	248.678	1.8615
9.47	251.475	2.4888	248.693	1.7064
9.5	251.46	2.4888	248.693	1.7064
9.53	251.429	2.4888	248.662	1.5512
9.57	251.429	2.4888	248.662	1.5512
9.6	251.413	2.6443	248.631	1.5512
9.63	251.413	2.6443	248.615	1.5512
9.67	251.382	2.6443	248.615	1.5512
9.7	251.382	2.6443	248.615	1.5512
9.73	251.398	2.6443	248.6	1.5512
9.77	251.398	2.6443	248.6	1.5512
9.8	251.398	2.6443	248.6	1.5512
9.83	251.398	2.6443	248.615	1.5512
9.87	251.382	2.6443	248.615	1.5512
9.9	251.382	2.6443	248.615	1.7064
9.93	251.366	2.6443	248.6	1.8615
9.97	251.366	2.4888	248.584	1.8615
10	251.32	2.6443	248.584	2.0166
10.03	251.304	2.6443	248.584	2.1717
10.07	251.273	2.6443	248.584	2.1717
10.1	251.289	2.6443	248.584	2.1717
10.13	251.32	2.6443	248.569	2.1717
10.17	251.32	2.6443	248.553	2.3268
10.2	251.335	2.4888	248.522	2.3268
10.23	251.304	2.4888	248.522	2.482
10.27	251.32	2.4888	248.538	2.3268
10.3	251.304	2.4888	248.569	2.3268
10.33	251.304	2.3332	248.553	2.3268
10.37	251.273	2.4888	248.553	2.3268
10.4	251.257	2.4888	248.538	2.3268
10.43	251.273	2.6443	248.538	2.3268
10.47	251.289	2.6443	248.538	2.3268
10.5	251.273	2.6443	248.507	2.3268
10.53	251.273	2.6443	248.507	2.482
10.57	251.304	2.6443	248.507	2.482
10.6	251.32	2.4888	248.522	2.482
10.63	251.32	2.3332	248.522	2.3268
10.67	251.32	2.3332	248.507	2.3268
10.7	251.32	2.1777	248.491	2.3268
10.73	251.304	2.1777	248.476	2.3268
10.77	251.273	2.1777	248.46	2.3268
10.8	251.257	2.0221	248.445	2.3268
10.83	251.273	1.8666	248.445	2.3268
10.87	251.273	1.8666	248.46	2.3268
10.9	251.289	1.711	248.46	2.1717
10.93	251.273	1.5555	248.445	2.3268
10.97	251.242	1.5555	248.445	2.3268
11	251.211	1.5555	248.445	2.3268
11.03	251.18	1.711	248.46	2.3268
11.07	251.149	1.8666	248.445	2.3268
11.1	251.195	1.8666	248.445	2.3268
11.13	251.242	1.711	248.445	2.3268
11.17	251.242	1.711	248.46	2.3268
11.2	251.257	1.5555	248.46	2.1717
11.23	251.257	1.3999	248.445	2.1717
11.27	251.257	1.2444	248.429	2.0166
11.3	251.242	1.2444	248.414	2.0166
11.33	251.195	1.2444	248.398	2.1717
11.37	251.164	1.3999	248.383	2.1717
11.4	251.149	1.5555	248.367	2.1717
11.43	251.149	1.711	248.383	2.1717
11.47	251.149	1.8666	248.367	2.1717
11.5	251.133	2.0221	248.336	2.3268
11.53	251.149	2.0221	248.336	2.482
11.57	251.164	2.0221	248.352	2.482
11.6	251.133	2.1777	248.336	2.6371
11.63	251.086	2.3332	248.321	2.6371
11.67	251.071	2.4888	248.305	2.6371
11.7	251.071	2.6443	248.305	2.7922
11.73	251.055	2.9554	248.336	2.7922
11.77	251.055	3.111	248.336	2.6371
11.8	251.024	3.2665	248.352	2.6371
11.83	251.024	3.4221	248.336	2.6371
11.87	251.04	3.5776	248.336	2.6371
11.9	251.055	3.7332	248.336	2.482
11.93	251.04	3.7332	248.321	2.482
11.97	251.04	3.7332	248.336	2.3268
12	251.055	3.7332	248.336	2.3268
12.03	251.055	3.5776	248.352	2.1717
12.07	251.04	3.5776	248.321	2.1717
12.1	251.055	3.4221	248.274	2.1717
12.13	251.055	3.4221	248.243	2.3268
12.17	251.009	3.4221	248.243	2.482
12.2	251.009	3.4221	248.243	2.482
12.23	251.024	3.2665	248.243	2.6371
12.27	251.04	3.2665	248.228	2.6371
12.3	251.04	3.111	248.243	2.7922
12.33	251.024	3.111	248.274	2.6371
12.37	251.024	3.111	248.274	2.6371
12.4	250.993	3.2665	248.259	2.482
12.43	250.993	3.2665	248.243	2.482
12.47	250.993	3.111	248.243	2.482
12.5	250.931	3.111	248.228	2.3268
12.53	250.931	3.111	248.212	2.3268
12.57	250.946	2.9554	248.212	2.3268
12.6	250.962	2.7999	248.212	2.1717
12.63	250.931	2.6443	248.212	2.1717
12.67	250.931	2.6443	248.212	2.1717
12.7	250.962	2.4888	248.228	2.1717
12.73	250.978	2.4888	248.212	2.1717
12.77	250.993	2.3332	248.197	2.0166
12.8	250.978	2.1777	248.197	2.0166
12.83	250.946	2.1777	248.197	2.1717
12.87	250.931	2.0221	248.166	2.1717
12.9	250.9	2.0221	248.15	2.3268
12.93	250.884	2.0221	248.15	2.3268
12.97	250.869	2.0221	248.15	2.482
13	250.869	2.1777	248.135	2.482
13.03	250.869	2.1777	248.119	2.6371
13.07	250.9	2.3332	248.103	2.7922
13.1	250.915	2.3332	248.088	2.9473
13.13	250.931	2.3332	248.103	2.9473
13.17	250.946	2.3332	248.103	2.9473
13.2	250.931	2.1777	248.119	2.9473
13.23	250.946	2.1777	248.135	2.7922
13.27	250.931	2.0221	248.135	2.7922
13.3	250.9	2.0221	248.135	2.6371
13.33	250.869	2.0221	248.119	2.482
13.37	250.853	2.0221	248.103	2.482
13.4	250.838	2.1777	248.088	2.3268
13.43	250.853	2.1777	248.088	2.3268
13.47	250.853	2.0221	248.088	2.482
13.5	250.838	2.1777	248.103	2.482
13.53	250.806	2.1777	248.088	2.482
13.57	250.806	2.3332	248.088	2.482
13.6	250.791	2.3332	248.057	2.482
13.63	250.806	2.3332	248.057	2.6371
13.67	250.791	2.3332	248.042	2.482
13.7	250.806	2.1777	248.042	2.482
13.73	250.822	2.1777	248.042	2.482
13.77	250.838	2.1777	248.042	2.482
13.8	250.806	2.1777	248.057	2.482
13.83	250.791	2.1777	248.057	2.3268
13.87	250.822	2.3332	248.042	2.3268
13.9	250.838	2.1777	248.042	2.3268
13.93	250.806	2.1777	248.026	2.3268
13.97	250.806	2.1777	248.042	2.1717
14	250.822	2.1777	248.042	2.1717
14.03	250.838	2.0221	248.057	2.0166
14.07	250.806	2.0221	248.042	1.8615
14.1	250.775	1.8666	248.042	1.8615
14.13	250.775	1.8666	248.011	1.7064
14.17	250.775	1.8666	247.979	1.7064
14.2	250.76	1.8666	247.964	1.8615
14.23	250.729	1.8666	247.964	1.8615
14.27	250.713	2.0221	247.979	1.8615
14.3	250.698	2.1777	247.995	1.8615
14.33	250.698	2.4888	247.995	1.8615
14.37	250.713	2.4888	247.995	1.8615
14.4	250.729	2.6443	247.979	1.8615
14.43	250.698	2.6443	247.948	2.0166
14.47	250.667	2.6443	247.933	2.1717
14.5	250.635	2.6443	247.917	2.3268
14.53	250.651	2.7999	247.917	2.3268
14.57	250.651	2.6443	247.917	2.3268
14.6	250.651	2.6443	247.917	2.482
14.63	250.635	2.6443	247.917	2.3268
14.67	250.62	2.7999	247.917	2.3268
14.7	250.604	2.9554	247.933	2.3268
14.73	250.62	2.9554	247.917	2.3268
14.77	250.62	3.111	247.917	2.482
14.8	250.604	3.111	247.917	2.3268
14.83	250.573	3.2665	247.933	2.3268
14.87	250.558	3.4221	247.917	2.3268
14.9	250.573	3.5776	247.902	2.3268
14.93	250.604	3.5776	247.886	2.3268
14.97	250.589	3.7332	247.871	2.3268
15	250.573	3.8887	247.871	2.482
15.03	250.542	3.8887	247.855	2.482
15.07	250.542	4.0443	247.871	2.482
15.1	250.573	3.8887	247.886	2.482
15.13	250.589	3.8887	247.886	2.482
15.17	250.604	3.7332	247.886	2.3268
15.2	250.573	3.7332	247.886	2.3268
15.23	250.558	3.5776	247.871	2.3268
15.27	250.558	3.5776	247.871	2.3268
15.3	250.542	3.4221	247.871	2.1717
15.33	250.526	3.4221	247.871	2.1717
15.37	250.526	3.2665	247.855	2.0166
15.4	250.558	2.9554	247.871	1.8615
15.43	250.558	2.7999	247.871	1.7064
15.47	250.511	2.7999	247.871	1.7064
15.5	250.526	2.6443	247.886	1.5512
15.53	250.526	2.4888	247.886	1.5512
15.57	250.511	2.4888	247.871	1.3961
15.6	250.511	2.3332	247.871	1.3961
15.63	250.495	2.3332	247.855	1.241
15.67	250.495	2.3332	247.84	1.241
15.7	250.464	2.3332	247.824	1.241
15.73	250.48	2.1777	247.824	1.0859
15.77	250.48	2.1777	247.809	1.0859
15.8	250.495	2.0221	247.793	1.241
15.83	250.48	2.0221	247.793	1.3961
15.87	250.464	2.0221	247.809	1.3961
15.9	250.449	2.0221	247.824	1.3961
15.93	250.48	2.0221	247.824	1.3961
15.97	250.48	2.0221	247.809	1.3961
16	250.449	2.0221	247.809	1.3961
16.03	250.449	2.0221	247.793	1.3961
16.07	250.449	2.0221	247.778	1.5512
16.1	250.449	2.0221	247.778	1.5512
16.13	250.464	1.8666	247.778	1.5512
16.17	250.449	2.0221	247.793	1.5512
16.2	250.449	2.0221	247.778	1.5512
16.23	250.449	2.0221	247.747	1.5512
16.27	250.464	1.8666	247.716	1.7064
16.3	250.464	1.8666	247.716	1.8615
16.33	250.449	1.8666	247.716	2.0166
16.37	250.449	1.8666	247.716	2.1717
16.4	250.418	1.8666	247.731	2.1717
16.43	250.402	1.8666	247.747	2.1717
16.47	250.402	1.8666	247.762	2.1717
16.5	250.387	1.8666	247.747	2.1717
16.53	250.371	1.8666	247.747	2.1717
16.57	250.371	1.8666	247.731	2.1717
16.6	250.34	2.0221	247.716	2.1717
16.63	250.324	2.1777	247.7	2.3268
16.67	250.324	2.3332	247.7	2.3268
16.7	250.309	2.3332	247.716	2.3268
16.73	250.293	2.4888	247.731	2.3268
16.77	250.293	2.4888	247.731	2.1717
16.8	250.309	2.6443	247.731	2.1717
16.83	250.309	2.6443	247.716	2.0166
16.87	250.309	2.6443	247.716	1.8615
16.9	250.309	2.7999	247.685	1.8615
16.93	250.324	2.7999	247.669	1.8615
16.97	250.324	2.7999	247.669	1.8615
17	250.324	2.6443	247.654	1.8615
17.03	250.278	2.7999	247.638	1.8615
17.07	250.262	2.9554	247.638	2.0166
17.1	250.262	2.9554	247.654	2.0166
17.13	250.278	2.9554	247.654	2.0166
17.17	250.278	2.9554	247.654	2.0166
17.2	250.262	3.111	247.638	2.1717
17.23	250.246	3.111	247.607	2.1717
17.27	250.278	3.111	247.592	2.1717
17.3	250.262	2.9554	247.592	2.1717
17.33	250.293	2.9554	247.592	2.1717
17.37	250.278	2.9554	247.607	2.1717
17.4	250.262	2.9554	247.654	2.1717
17.43	250.246	2.7999	247.669	2.0166
17.47	250.246	2.7999	247.685	1.8615
17.5	250.246	2.7999	247.685	1.7064
17.53	250.215	2.6443	247.654	1.5512
17.57	250.2	2.6443	247.623	1.5512
17.6	250.2	2.6443	247.576	1.7064
17.63	250.2	2.4888	247.576	1.8615
17.67	250.184	2.4888	247.576	2.0166
17.7	250.169	2.3332	247.592	2.0166
17.73	250.184	2.3332	247.607	2.0166
17.77	250.153	2.3332	247.592	2.0166
17.8	250.184	2.3332	247.576	2.0166
17.83	250.231	2.1777	247.561	2.0166
17.87	250.231	2.0221	247.545	2.0166
17.9	250.184	2.0221	247.53	2.0166
17.93	250.2	1.8666	247.53	2.1717
17.97	250.246	1.8666	247.545	2.1717
18	250.231	1.711	247.545	2.1717
18.03	250.231	1.711	247.545	2.1717
18.07	250.215	1.711	247.545	2.1717
18.1	250.169	1.711	247.545	2.0166
18.13	250.138	1.711	247.53	2.0166
18.17	250.122	1.8666	247.514	2.0166
18.2	250.06	2.0221	247.514	1.8615
18.23	250.013	2.3332	247.514	1.8615
18.27	249.998	2.4888	247.499	2.0166
18.3	250.013	2.6443	247.499	2.0166
18.33	250.013	2.7999	247.483	2.0166
18.37	250.029	2.9554	247.468	2.1717
18.4					0
18.4	249.951	3.2665	247.483	2.1717	500
18.43	249.858	3.7332	247.499	2.1717
18.47	249.718	4.3554	247.499	2.1717
18.5	249.609	5.1331	247.483	2.1717
18.53	249.484	6.0664	247.483	2.1717
18.57	249.36	7.3108	247.499	2.1717
18.6	249.22	8.5552	247.499	2.3268
18.63	249.095	9.9551	247.561	2.1717
18.67	248.971	11.5106	247.468	2.3268
18.7	248.846	13.0661	247.39	2.482
18.73	248.738	14.7771	247.375	2.6371
18.77	248.613	16.6437	247.375	2.6371
18.8	248.535	18.5103	247.343	2.6371
18.83	248.489	20.2213	247.328	2.7922
18.87	248.349	22.0879	247.266	2.9473
18.9	248.224	24.11	247.173	3.2576
18.93	248.084	26.1322	247.111	3.8781
18.97	247.929	28.3098	247.049	4.4986
19	247.773	30.6431	246.971	5.1191
19.03	247.696	32.8207	246.909	5.8947
19.07	247.618	34.8429	246.847	6.6703
19.1	247.493	37.0205	246.8	7.4459
19.13	247.369	39.0427	246.754	8.2215
19.17	247.229	40.9093	246.707	9.1523
19.2	247.073	42.9314	246.661	10.083
19.23	246.918	44.9535	246.614	11.0137
19.27	246.824	46.8201	246.568	11.9445
19.3	246.731	48.3756	246.521	12.8752
19.33	246.653	49.7755	246.49	13.6508
19.37	246.544	51.1755	246.459	14.4264
19.4	246.404	52.4199	246.413	15.3572
19.43	246.296	53.6642	246.382	15.9777
19.47	246.171	54.7531	246.351	16.7533
19.5	246.031	55.6864	246.32	17.5289
19.53	245.876	56.7752	246.273	18.1494
19.57	245.751	57.7085	246.227	18.7699
19.6	245.658	58.4862	246.18	19.3904
19.63	245.502	59.264	246.149	20.0109
19.67	245.362	59.5751	246.102	20.6313
19.7	245.253	59.8862	246.071	21.0967
19.73	245.191	59.8862	246.025	21.5621
19.77	245.098	59.7306	246.009	21.8723
19.8	244.973	59.7306	245.978	22.0274
19.83	244.787	59.7306	245.932	22.3377
19.87	244.616	59.8862	245.854	22.4928
19.9	244.46	60.1973	245.792	22.6479
19.93	244.336	60.5084	245.73	22.6479
19.97	244.227	60.6639	245.668	22.6479
20	244.118	60.975	245.637	22.4928
20.03	244.024	61.1306	245.591	22.6479
20.07	243.931	61.2861	245.529	22.6479
20.1	243.838	61.2861	245.498	22.4928
20.13	243.713	61.2861	245.466	22.3377
20.17	243.589	61.1306	245.42	22.0274
20.2	243.48	61.1306	245.389	21.8723
20.23	243.387	60.975	245.342	21.7172
20.27	243.262	60.8195	245.311	21.5621
20.3	243.091	60.8195	245.265	21.407
20.33	242.951	60.975	245.234	21.407
20.37	242.827	60.975	245.172	21.407
20.4	242.702	60.975	245.141	21.407
20.43	242.594	60.975	245.094	21.407
20.47	242.469	60.975	245.063	21.407
20.5	242.36	60.8195	245.001	21.407
20.53	242.251	60.975	244.97	21.5621
20.57	242.142	60.975	244.923	21.5621
20.6	242.018	60.975	244.877	21.7172
20.63	241.893	60.975	244.831	21.7172
20.67	241.738	60.975	244.799	21.7172
20.7	241.598	60.8195	244.753	21.8723
20.73	241.474	60.8195	244.722	21.8723
20.77	241.38	60.8195	244.675	21.8723
20.8	241.256	60.6639	244.629	21.8723
20.83	241.147	60.6639	244.582	21.8723
20.87	241.022	60.6639	244.551	21.7172
20.9	240.882	60.6639	244.52	21.7172
20.93	240.743	60.6639	244.489	21.7172
20.97	240.571	60.8195	244.443	21.5621
21	240.385	61.1306	244.396	21.5621
21.03						0
21.03	240.229	61.4417	244.334	21.407		500
21.07	240.089	61.7528	244.272	21.407
21.1	239.918	62.0639	244.287	21.2518
21.13	239.747	62.375	244.303	20.9416
21.17	239.56	62.8416	244.287	20.6313
21.2	239.389	63.4638	244.241	20.3211
21.23	239.265	64.2415	244.179	20.166
21.27	239.109	65.0193	244.07	20.166
21.3	238.923	65.797	243.977	20.166
21.33	238.705	66.7303	243.869	20.4762
21.37	238.58	67.6636	243.745	20.7865
21.4	238.394	68.4414	243.651	21.2518
21.43	238.191	69.3746	243.527	21.8723
21.47	237.927	70.3079	243.419	22.4928
21.5	237.709	71.5523	243.31	23.2684
21.53	237.569	72.6412	243.171	24.1992
21.57	237.398	73.5745	243.031	25.1299
21.6	237.196	74.6633	242.938	26.2158
21.63	236.978	75.9077	242.814	27.3016
21.67	236.792	77.1521	242.69	28.5426
21.7	236.62	78.3965	242.581	29.7836
21.73	236.449	79.4853	242.488	31.0246
21.77	236.278	80.7297	242.38	32.2656
21.8	236.076	81.8185	242.271	33.5065
21.83	235.905	82.9074	242.147	34.9026
21.87	235.749	83.8407	241.992	36.4539
21.9	235.578	84.7739	241.868	37.85
21.93	235.392	85.5517	241.744	39.4012
21.97	235.174	86.485	241.635	40.9524
22	234.94	87.4183	241.526	42.3485
22.03	234.723	88.3516	241.387	43.8998
22.07	234.52	89.2849	241.247	45.2959
22.1	234.334	90.0626	241.107	46.8471
22.13	234.147	90.8403	240.983	48.3983
22.17	234.007	91.307	240.859	49.7944
22.2	233.852	91.7736	240.72	51.3457
22.23	233.665	92.0847	240.611	52.5867
22.27	233.463	92.3958	240.487	53.9828
22.3	233.276	92.7069	240.363	55.0686
22.33	233.074	93.018	240.254	56.1545
22.37	232.887	93.1736	240.146	57.2403
22.4	232.732	93.3291	240.037	58.1711
22.43	232.576	93.4847	239.913	58.9467
22.47	232.421	93.4847	239.82	59.5672
22.5	232.265	93.3291	239.711	59.7223
22.53	232.078	93.3291	239.618	59.8774
22.57	231.907	93.018	239.51	59.8774
22.6	231.752	92.7069	239.401	59.8774
22.63	231.581	92.3958	239.277	59.8774
22.67	231.425	92.0847	239.137	59.8774
22.7	231.238	91.6181	238.982	59.8774
22.73	231.005	91.307	238.843	60.0326
22.77	230.819	91.1514	238.719	60.0326
22.8	230.632	90.9959	238.61	60.0326
22.83	230.414	90.9959	238.501	60.0326
22.87	230.196	90.9959	238.377	60.0326
22.9	230.025	90.8403	238.253	60.0326
22.93	229.839	90.8403	238.145	60.0326
22.97	229.667	90.8403	238.036	60.0326
23	229.481	90.9959	237.928	60.0326
23.03	229.294	90.9959	237.788	60.0326
23.07	229.138	90.8403	237.664	59.8774
23.1	228.967	90.8403	237.54	59.8774
23.13	228.812	90.6848	237.416	59.7223
23.17	228.656	90.5292	237.322	59.5672
23.2	228.454	90.3737	237.198	59.5672
23.23	228.252	90.2181	237.09	59.4121
23.27	228.065	89.907	236.966	59.4121
23.3	227.879	89.907	236.842	59.4121
23.33	227.723	89.907	236.749	59.2569
23.37	227.599	89.7515	236.64	59.1018
23.4	227.412	89.7515	236.531	58.9467
23.43	227.241	89.7515	236.423	58.9467
23.47	227.07	89.7515	236.314	58.7916
23.5	226.821	89.907	236.206	58.7916
23.53	226.588	89.907	236.082	58.6365
23.57	226.401	90.0626	235.957	58.6365
23.6	226.261	90.2181	235.818	58.6365
23.63	226.152	90.2181	235.694	58.7916
23.67	225.996	90.2181	235.57	58.7916
23.7	225.794	90.2181	235.446	58.9467
23.73	225.53	90.3737	235.337	58.9467
23.77	225.25	90.6848	235.213	58.9467
23.8							0
23.8	224.923	91.1514	235.073	58.9467			500
23.83	224.565	91.9292	234.949	59.1018
23.87	224.192	93.018	234.872	58.9467
23.9	223.819	94.418	234.84	58.6365
23.93	223.461	95.9734	234.779	58.3262
23.97	223.103	97.6845	234.685	57.8608
24	222.73	99.7066	234.608	57.3955
24.03	222.341	101.884	234.499	57.0852
24.07	221.921	104.373	234.422	56.6199
24.1	221.517	107.329	234.298	56.3096
24.13	221.143	110.284	234.189	55.9994
24.17	220.77	113.395	234.065	55.6891
24.2	220.381	116.817	233.91	55.534
24.23	220.008	120.395	233.755	55.3789
24.27	219.666	123.972	233.615	55.3789
24.3	219.246	127.705	233.491	55.3789
24.33	218.81	131.594	233.367	55.2237
24.37	218.39	135.638	233.227	55.3789
24.4	218.001	139.527	233.088	55.534
24.43	217.612	143.571	232.933	55.6891
24.47	217.208	147.616	232.762	55.9994
24.5	216.804	151.504	232.622	56.3096
24.53	216.43	155.393	232.467	56.775
24.57	216.072	159.126	232.312	57.2403
24.6	215.684	162.859	232.157	57.8608
24.63	215.264	166.593	232.017	58.3262
24.67	214.89	170.17	231.909	58.9467
24.7	214.501	173.281	231.8	59.4121
24.73	214.081	176.392	231.676	59.7223
24.77	213.677	179.347	231.552	60.1877
24.8	213.288	182.147	231.443	60.653
24.83	212.899	184.792	231.335	60.9633
24.87	212.542	187.125	231.211	61.2735
24.9	212.199	189.303	231.087	61.5838
24.93	211.795	191.014	230.978	61.894
24.97	211.359	192.413	230.823	62.3594
25	210.986	193.502	230.668	62.8248
25.03	210.613	194.125	230.544	63.2901
25.07	210.208	194.591	230.404	63.7555
25.1	209.757	195.058	230.264	64.376
25.13	209.368	195.369	230.125	64.9965
25.17	208.995	195.524	230.001	65.4619
25.2	208.606	195.68	229.861	66.0823
25.23	208.186	195.991	229.69	66.5477
25.27	207.766	196.147	229.566	66.7028
25.3	207.377	196.302	229.427	67.0131
25.33	206.988	196.302	229.318	67.1682
25.37	206.6	196.458	229.21	67.1682
25.4	206.195	196.613	229.07	67.0131
25.43	205.791	196.769	228.93	67.0131
25.47	205.402	196.924	228.791	66.858
25.5	205.013	196.924	228.651	66.7028
25.53	204.64	196.924	228.527	66.5477
25.57	204.235	196.924	228.372	66.5477
25.6	203.862	196.924	228.232	66.3926
25.63	203.458	196.769	228.124	66.3926
25.67	203.037	196.924	227.984	66.2375
25.7	202.649	196.924	227.875	66.0823
25.73	202.306	196.924	227.751	65.9272
25.77	201.917	196.924	227.596	65.9272
25.8	201.529	196.924	227.472	65.7721
25.83	201.171	196.924	227.364	65.7721
25.87	200.813	196.769	227.224	65.7721
25.9	200.378	196.769	227.115	65.7721
25.93	199.989	196.613	226.976	65.9272
25.97	199.615	196.458	226.836	66.0823
26	199.227	196.302	226.635	66.2375
26.03	198.807	196.302	226.495	66.3926
26.07	198.418	196.147	226.371	66.5477
26.1	198.029	196.147	226.247	66.7028
26.13	197.655	196.147	226.154	66.7028
26.17	197.282	195.991	226.03	66.7028
26.2	196.893	195.836	225.905	66.5477
26.23	196.505	195.524	225.766	66.3926
26.27	196.116	195.369	225.626	66.3926
26.3	195.727	195.213	225.487	66.2375
26.33	195.353	194.902	225.378	66.2375
26.37	194.964	194.747	225.238	66.0823
26.4	194.576	194.436	225.099	66.0823
26.43	194.187	194.28	224.944	66.0823
26.47	193.845	194.125	224.804	66.0823
26.5	193.456	193.814	224.665	66.0823
26.53	193.051	193.658	224.525	66.0823
26.57	192.662	193.502	224.401	66.2375
26.6	192.274	193.347	224.277	66.2375
26.63	191.9	193.191	224.153	66.2375
26.67	191.511	193.036	224.044	66.2375
26.7	191.123	193.036	223.92	66.2375
26.73	190.702	193.036	223.796	66.0823
26.77	190.314	193.036	223.672	66.0823
26.8	189.971	192.88	223.47	66.0823
26.83	189.614	192.88	223.33	66.2375
26.87	189.209	192.725	223.175	66.2375
26.9	188.867	192.569	223.036	66.3926
26.93								0
26.93	188.525	192.413	222.912	66.5477				500
26.97	188.198	192.102	222.787	66.7028
27	187.84	191.791	222.71	66.7028
27.03	187.42	191.636	222.586	66.7028
27.07	187.016	191.48	222.446	66.5477
27.1	186.627	191.325	222.276	66.7028
27.13	186.223	191.169	222.089	66.7028
27.17	185.803	191.014	221.903	67.0131
27.2	185.336	191.014	221.686	67.3233
27.23	184.916	191.169	221.5	67.6336
27.27	184.543	191.325	221.314	68.0989
27.3	184.138	191.48	221.097	68.7194
27.33	183.703	191.636	220.88	69.4951
27.37	183.267	192.102	220.647	70.4258
27.4	182.847	192.569	220.368	71.6668
27.43	182.443	193.036	220.15	72.9078
27.47	182.038	193.502	219.918	74.1487
27.5	181.603	193.969	219.716	75.5448
27.53	181.198	194.436	219.499	76.7858
27.57	180.794	195.058	219.282	78.1819
27.6	180.39	195.524	219.08	79.7332
27.63	179.985	196.147	218.847	81.2844
27.67	179.581	196.769	218.615	82.6805
27.7	179.192	197.236	218.382	84.3869
27.73	178.787	197.702	218.149	85.9381
27.77	178.368	198.324	217.932	87.6444
27.8	177.932	198.947	217.715	89.3508
27.83	177.543	199.413	217.482	91.0571
27.87	177.154	199.88	217.203	92.9186
27.9	176.75	200.346	216.955	94.7801
27.93	176.361	200.813	216.722	96.6416
27.97	175.972	201.28	216.489	98.3479
28	175.568	201.746	216.272	100.054
28.03	175.179	202.058	216.071	101.606
28.07	174.805	202.369	215.869	103.002
28.1	174.417	202.68	215.667	104.243
28.13	173.981	202.991	215.466	105.484
28.17	173.561	203.302	215.233	106.725
28.2	173.141	203.613	215.031	107.81
28.23	172.768	203.613	214.814	108.741
28.27	172.379	203.613	214.597	109.672
28.3	172.006	203.458	214.349	110.448
28.33	171.617	203.146	214.116	111.068
28.37	171.212	202.68	213.868	111.533
28.4	170.761	202.524	213.635	111.844
28.43	170.294	202.369	213.434	112.154
28.47	169.859	202.213	213.216	112.309
28.5	169.439	202.213	212.999	112.309
28.53	169.019	202.213	212.767	112.309
28.57	168.63	202.213	212.549	112.309
28.6	168.257	202.213	212.317	112.309
28.63	167.868	202.058	212.1	112.154
28.67	167.479	201.902	211.898	111.999
28.7	167.09	201.902	211.681	111.844
28.73	166.639	201.902	211.464	111.844
28.77	166.219	202.058	211.2	111.844
28.8	165.815	202.058	210.967	111.844
28.83	165.395	202.213	210.75	111.844
28.87	165.006	202.369	210.548	111.844
28.9	164.633	202.369	210.347	111.689
28.93	164.244	202.369	210.145	111.533
28.97	163.824	202.524	209.943	111.223
29	163.435	202.524	209.726	111.068
29.03	162.984	202.524	209.509	110.758
29.07	162.564	202.68	209.292	110.603
29.1	162.159	202.835	209.075	110.448
29.13	161.755	202.991	208.857	110.137
29.17	161.366	203.146	208.656	109.982
29.2	160.946	203.302	208.439	109.827
29.23	160.511	203.458	208.221	109.672
29.27	160.106	203.613	207.989	109.672
29.3	159.686	203.769	207.772	109.672
29.33	159.251	204.08	207.57	109.672
29.37	158.846	204.235	207.353	109.672
29.4	158.442	204.235	207.12	109.517
29.43	158.022	204.235	206.918	109.362
29.47	157.633	204.391	206.717	109.207
29.5	157.291	204.391	206.484	109.051
29.53	156.902	204.235	206.282	108.896
29.57	156.497	204.235	206.065	108.586
29.6	156.093	204.08	205.864	108.431
29.63	155.673	203.924	205.677	108.121
29.67	155.237	203.769	205.476	107.966
29.7	154.833	203.458	205.274	107.655
29.73	154.46	203.302	205.057	107.5
29.77	154.055	203.302	204.84	107.345
29.8	153.666	203.302	204.623	107.19
29.83	153.262	203.302	204.39	107.035
29.87	152.857	203.302	204.173	106.88
29.9	152.469	203.146	203.971	106.725
29.93	152.064	203.146	203.754	106.725
29.97	151.629	202.991	203.552	106.569
30	151.24	202.835	203.366	106.414
30.03	150.929	202.524	203.164	106.259
30.07	150.68	202.058	202.963	105.949	109.669

## Sheet: 3 mg.ml primary data n=2
Time [min]	1A: O2 Concentration [nmol/ml]	1A: O2 Slope uncorr. [pmol/(s*ml)]	1B: O2 Concentration [nmol/ml]	1B: O2 Slope uncorr. [pmol/(s*ml)]	mitos	NADH	ADP	cyt c
0	244.63		245.182
0.03	244.63		245.182
0.07	244.645		245.182
0.1	244.676		245.197
0.13	244.692	-8.5275	245.197	-2.3349
0.17	244.692	-8.5275	245.197	-2.3349
0.2	244.707	-6.977	245.182	0
0.23	244.738	-6.977	245.182	2.3349
0.27	244.769	-10.0779	245.182	2.3349
0.3	244.769	-8.5275	245.197	-0.3113
0.33	244.723	-6.977	245.197	-0.3113
0.37	244.676	-3.8761	245.182	0.1557
0.4	244.707	-1.7055	245.151	1.401
0.43	244.723	-0.6202	245.151	2.0236
0.47	244.738	-3.411	245.135	1.2453
0.5	244.738	-2.9459	245.104	2.1793
0.53	244.692	-1.5504	245.088	3.2689
0.57	244.723	-0.7752	245.104	3.7359
0.6	244.769	-0.7752	245.104	4.0472
0.63	244.769	-2.6358	245.104	2.8019
0.67	244.738	-2.1706	245.12	2.8019
0.7	244.707	-1.3954	245.12	2.9576
0.73	244.707	-0.7752	245.12	2.9576
0.77	244.676	0	245.12	2.8019
0.8	244.692	-1.2404	245.104	2.3349
0.83	244.661	-0.6202	245.104	2.3349
0.87	244.63	0.155	245.088	2.4906
0.9	244.599	1.0853	245.088	2.4906
0.93	244.583	1.8605	245.088	2.4906
0.97	244.521	0.9303	245.088	2.1793
1	244.537	1.7055	245.088	2.1793
1.03	244.552	2.3257	245.073	2.1793
1.07	244.568	2.7908	245.073	2.3349
1.1	244.568	3.2559	245.088	2.1793
1.13	244.537	2.0156	245.088	2.0236
1.17	244.537	2.4807	245.088	2.0236
1.2	244.506	2.9459	245.057	2.0236
1.23	244.521	3.411	245.042	2.0236
1.27	244.537	3.566	245.026	2.1793
1.3	244.552	2.4807	245.011	2.0236
1.33	244.537	2.7908	244.995	2.1793
1.37	244.49	3.1009	244.995	2.3349
1.4	244.49	3.411	244.995	2.3349
1.43	244.49	3.566	244.995	2.3349
1.47	244.49	3.7211	244.995	2.3349
1.5	244.521	3.8761	244.98	2.4906
1.53	244.537	3.8761	244.964	2.4906
1.57	244.537	3.8761	244.964	2.4906
1.6	244.552	3.7211	244.964	2.4906
1.63	244.552	3.566	244.964	2.4906
1.67	244.583	3.411	244.98	2.4906
1.7	244.583	3.2559	244.98	2.3349
1.73	244.583	3.1009	244.98	2.3349
1.77	244.599	2.7908	244.98	2.3349
1.8	244.583	2.6358	244.98	2.3349
1.83	244.583	2.3257	244.964	2.3349
1.87	244.614	2.1706	244.933	2.4906
1.9	244.599	1.8605	244.933	2.4906
1.93	244.599	1.3954	244.933	2.4906
1.97	244.568	1.0853	244.933	2.6462
2	244.552	0.7752	244.948	2.6462
2.03	244.568	0.6202	244.948	2.4906
2.07	244.583	0.3101	244.948	2.4906
2.1	244.614	0	244.948	2.3349
2.13	244.583	-0.3101	244.948	2.3349
2.17	244.521	-0.4651	244.964	2.1793
2.2	244.506	-0.4651	244.948	2.1793
2.23	244.537	-0.4651	244.933	2.0236
2.27	244.568	-0.6202	244.917	2.0236
2.3	244.568	-0.6202	244.917	2.0236
2.33	244.583	-0.6202	244.902	1.8679
2.37	244.568	-0.6202	244.87	2.0236
2.4	244.552	-0.6202	244.87	2.0236
2.43	244.49	-0.6202	244.855	2.0236
2.47	244.475	-0.4651	244.839	2.0236
2.5	244.459	-0.155	244.824	2.0236
2.53	244.444	0	244.808	2.0236
2.57	244.428	0.3101	244.808	2.1793
2.6	244.459	0.4651	244.824	2.1793
2.63	244.506	0.4651	244.824	2.1793
2.67	244.521	0.6202	244.824	2.3349
2.7	244.521	0.7752	244.839	2.3349
2.73	244.537	0.7752	244.855	2.3349
2.77	244.521	0.9303	244.839	2.3349
2.8	244.506	1.0853	244.855	2.3349
2.83	244.506	1.2404	244.839	2.3349
2.87	244.537	1.2404	244.824	2.3349
2.9	244.552	1.2404	244.808	2.3349
2.93	244.537	1.2404	244.808	2.4906
2.97	244.537	1.2404	244.824	2.4906
3	244.521	1.2404	244.808	2.4906
3.03	244.506	1.2404	244.808	2.3349
3.07	244.49	1.2404	244.824	2.3349
3.1	244.49	1.2404	244.824	2.1793
3.13	244.552	1.0853	244.839	2.1793
3.17	244.583	0.9303	244.839	2.0236
3.2	244.568	0.6202	244.839	2.0236
3.23	244.537	0.4651	244.824	1.8679
3.27	244.506	0.4651	244.808	1.8679
3.3	244.49	0.4651	244.808	1.8679
3.33	244.459	0.4651	244.808	1.7123
3.37	244.475	0.4651	244.808	1.7123
3.4	244.49	0.4651	244.824	1.5566
3.43	244.444	0.4651	244.808	1.401
3.47	244.428	0.4651	244.808	1.2453
3.5	244.428	0.6202	244.808	1.0896
3.53	244.428	0.7752	244.793	1.0896
3.57	244.444	0.7752	244.793	0.934
3.6	244.459	0.7752	244.777	0.7783
3.63	244.444	0.7752	244.762	0.7783
3.67	244.397	0.7752	244.762	0.7783
3.7	244.397	0.7752	244.762	0.7783
3.73	244.459	0.7752	244.762	0.7783
3.77	244.459	0.7752	244.762	0.7783
3.8	244.444	0.9303	244.746	0.7783
3.83	244.444	1.0853	244.746	0.934
3.87	244.428	1.2404	244.746	1.0896
3.9	244.382	1.5504	244.73	1.2453
3.93	244.382	1.8605	244.73	1.2453
3.97	244.413	1.8605	244.73	1.401
4	244.444	1.8605	244.73	1.401
4.03	244.475	1.8605	244.73	1.5566
4.07	244.459	1.7055	244.73	1.5566
4.1	244.428	1.7055	244.73	1.5566
4.13	244.397	1.7055	244.73	1.5566
4.17	244.397	1.8605	244.73	1.5566
4.2	244.397	1.8605	244.746	1.5566
4.23	244.413	1.7055	244.762	1.5566
4.27	244.444	1.7055	244.73	1.5566
4.3	244.444	1.5504	244.73	1.5566
4.33	244.428	1.3954	244.73	1.5566
4.37	244.444	1.3954	244.746	1.5566
4.4	244.444	1.2404	244.746	1.5566
4.43	244.444	1.2404	244.73	1.401
4.47	244.428	1.0853	244.715	1.401
4.5	244.413	0.9303	244.699	1.401
4.53	244.397	0.7752	244.684	1.401
4.57	244.397	0.6202	244.668	1.401
4.6	244.366	0.6202	244.684	1.401
4.63	244.382	0.6202	244.684	1.401
4.67	244.382	0.6202	244.684	1.401
4.7	244.351	0.6202	244.668	1.401
4.73	244.366	0.6202	244.668	1.401
4.77	244.413	0.6202	244.668	1.401
4.8	244.444	0.6202	244.668	1.401
4.83	244.428	0.4651	244.668	1.401
4.87	244.382	0.6202	244.668	1.401
4.9	244.366	0.6202	244.684	1.2453
4.93	244.335	0.6202	244.684	1.2453
4.97	244.32	0.7752	244.699	1.2453
5	244.335	0.9303	244.668	1.2453
5.03	244.335	1.0853	244.637	1.2453
5.07	244.351	1.0853	244.637	1.2453
5.1	244.351	1.0853	244.653	1.2453
5.13	244.366	1.0853	244.653	1.2453
5.17	244.382	1.0853	244.637	1.401
5.2	244.366	1.0853	244.606	1.401
5.23	244.351	1.2404	244.59	1.5566
5.27	244.335	1.3954	244.575	1.7123
5.3	244.351	1.3954	244.575	1.8679
5.33	244.366	1.3954	244.575	2.0236
5.37	244.366	1.2404	244.606	2.0236
5.4	244.351	1.0853	244.621	2.0236
5.43	244.351	1.0853	244.59	2.0236
5.47	244.366	1.0853	244.575	2.1793
5.5	244.366	1.0853	244.544	2.1793
5.53	244.366	1.0853	244.544	2.3349
5.57	244.351	1.0853	244.559	2.3349
5.6	244.335	1.0853	244.575	2.3349
5.63	244.304	1.0853	244.59	2.1793
5.67	244.289	1.2404	244.606	2.1793
5.7	244.258	1.2404	244.59	2.0236
5.73	244.273	1.2404	244.59	1.8679
5.77	244.32	1.2404	244.59	1.8679
5.8	244.32	1.0853	244.575	1.7123
5.83	244.304	1.0853	244.559	1.7123
5.87	244.304	1.0853	244.544	1.8679
5.9	244.289	1.0853	244.559	1.8679
5.93	244.289	1.2404	244.559	1.8679
5.97	244.273	1.2404	244.559	1.8679
6	244.211	1.3954	244.559	1.7123
6.03	244.227	1.7055	244.544	1.7123
6.07	244.242	1.7055	244.528	1.7123
6.1	244.242	1.7055	244.512	1.8679
6.13	244.258	1.7055	244.528	1.8679
6.17	244.242	1.5504	244.544	1.7123
6.2	244.18	1.7055	244.544	1.7123
6.23	244.134	2.0156	244.544	1.5566
6.27	244.18	2.1706	244.528	1.5566
6.3	244.211	2.3257	244.512	1.401
6.33	244.211	2.4807	244.512	1.401
6.37	244.18	2.6358	244.481	1.401
6.4	244.211	2.6358	244.481	1.401
6.43	244.227	2.6358	244.497	1.401
6.47	244.227	2.6358	244.497	1.401
6.5	244.211	2.4807	244.481	1.401
6.53	244.211	2.4807	244.466	1.401
6.57	244.211	2.4807	244.466	1.5566
6.6	244.211	2.4807	244.45	1.5566
6.63	244.196	2.4807	244.466	1.7123
6.67	244.211	2.3257	244.466	1.7123
6.7	244.211	2.3257	244.481	1.7123
6.73	244.258	2.0156	244.481	1.7123
6.77	244.258	1.8605	244.481	1.7123
6.8	244.227	1.7055	244.497	1.5566
6.83	244.211	1.5504	244.512	1.5566
6.87	244.149	1.5504	244.512	1.5566
6.9	244.071	1.7055	244.512	1.5566
6.93	244.087	1.7055	244.497	1.5566
6.97	244.087	1.8605	244.481	1.401
7	244.118	1.8605	244.466	1.401
7.03	244.149	2.0156	244.466	1.401
7.07	244.165	1.8605	244.45	1.2453
7.1	244.134	1.8605	244.45	1.2453
7.13	244.18	1.7055	244.466	1.2453
7.17	244.242	1.3954	244.466	1.2453
7.2	244.211	1.2404	244.45	1.2453
7.23	244.01	1.3954	244.435	1.2453
7.27	243.808	2.0156	244.435	1.2453
7.3	243.575	2.9459	244.435	1.0896
7.33	243.343	4.3413	244.45	1.0896
7.37	243.11	6.0467	244.435	1.0896
7.4	242.893	8.0623	244.419	1.0896
7.43	242.676	10.233	244.404	1.2453
7.47	242.49	12.7137	244.388	1.2453
7.5	242.288	15.3494	244.388	1.2453
7.53					0
7.53	242.071	18.2953	244.404	1.2453	500
7.57	241.885	21.5512	244.404	1.2453
7.6	241.684	24.8072	244.372	1.2453
7.63	241.498	28.2182	244.326	1.401
7.67	241.327	31.6291	244.232	1.7123
7.7	241.203	35.0401	244.155	2.1793
7.73	241.048	38.2961	244.092	2.8019
7.77	240.831	41.7071	243.999	3.4245
7.8	240.645	45.2731	243.952	4.2029
7.83	240.49	48.6841	243.89	4.9812
7.87	240.335	51.94	243.812	5.9151
7.9	240.164	55.351	243.75	6.8491
7.93	239.994	58.6069	243.656	7.9387
7.97	239.839	61.7078	243.594	9.0283
8	239.684	64.6537	243.485	10.2736
8.03	239.529	67.5995	243.376	11.5189
8.07	239.358	70.2353	243.267	12.9199
8.1	239.157	72.716	243.174	14.3208
8.13	238.971	75.1967	243.08	15.8774
8.17	238.815	77.5224	243.018	17.2784
8.2	238.691	79.693	242.94	18.6793
8.23	238.521	81.7086	242.847	20.2359
8.27	238.335	83.7242	242.785	21.6369
8.3	238.118	85.4297	242.722	23.0378
8.33	237.916	86.8251	242.629	24.4388
8.37	237.746	88.0655	242.551	25.8397
8.4	237.591	88.8407	242.458	27.3964
8.43	237.451	89.3058	242.395	28.7973
8.47	237.25	89.4609	242.364	29.8869
8.5	236.955	89.4609	242.318	30.9766
8.53	236.722	89.1508	242.255	32.0662
8.57	236.521	88.9957	242.193	33.0002
8.6	236.35	88.6856	242.131	33.9341
8.63	236.195	88.5306	242.069	34.7124
8.67	236.04	88.3755	242.006	35.3351
8.7	235.901	88.2205	241.929	35.9577
8.73	235.746	88.0655	241.882	36.4247
8.77	235.637	87.9104	241.835	36.736
8.8	235.513	87.7554	241.788	36.8917
8.83	235.374	87.4453	241.711	37.0473
8.87	235.265	87.1352	241.633	37.0473
8.9	235.141	86.8251	241.555	36.8917
8.93	235.001	86.515	241.493	36.736
8.97	234.862	86.2049	241.446	36.269
9	234.722	85.7398	241.384	35.9577
9.03	234.567	85.2746	241.337	35.6464
9.07	234.443	84.8095	241.29	35.3351
9.1	234.304	84.1893	241.244	34.8681
9.13	234.149	83.7242	241.181	34.4011
9.17	234.009	83.104	241.103	33.9341
9.2	233.839	82.6389	241.041	33.4671
9.23	233.653	82.1737	240.979	33.0002
9.27	233.435	81.7086	240.932	32.5332
9.3	233.28	81.3985	240.87	32.0662
9.33	233.141	80.9334	240.839	31.5992
9.37	232.986	80.3132	240.792	31.1322
9.4	232.831	79.8481	240.73	30.8209
9.43	232.691	79.3829	240.668	30.5096
9.47	232.536	78.9178	240.621	30.3539
9.5	232.397	78.4527	240.543	30.0426
9.53	232.288	77.8325	240.465	29.8869
9.57	232.164	77.0573	240.387	29.7313
9.6	232.009	76.4371	240.31	29.7313
9.63	231.885	75.8169	240.232	29.7313
9.67	231.745	75.3518	240.154	29.7313
9.7	231.559	74.8866	240.092	29.8869
9.73	231.389	74.4215	240.045	30.0426
9.77	231.234	73.9564	239.983	30.1983
9.8	231.11	73.4912	239.952	30.1983
9.83	231.032	73.3362	239.874	30.1983
9.87	230.846	73.1811	239.796	30.3539
9.9	230.676	73.3362	239.703	30.3539
9.93	230.521	73.4912	239.656	30.5096
9.97	230.381	73.6463	239.562	30.6652
10	230.242	73.8013	239.485	30.8209
10.03	230.071	73.9564	239.422	31.1322
10.07	229.931	74.1114	239.345	31.2879
10.1	229.776	74.2665	239.267	31.4435
10.13	229.652	74.4215	239.189	31.5992
10.17	229.513	74.4215	239.111	31.9105
10.2	229.358	74.4215	239.049	32.2219
10.23	229.187	74.4215	238.987	32.3775
10.27	229.032	74.4215	238.94	32.6888
10.3	228.877	74.4215	238.893	32.8445
10.33	228.722	74.2665	238.831	33.0002
10.37	228.583	74.2665	238.769	33.1558
10.4	228.443	74.1114	238.722	33.3115
10.43	228.319	73.9564	238.66	33.3115
10.47	228.179	73.8013	238.582	33.3115
10.5	228.024	73.6463	238.519	33.4671
10.53	227.885	73.3362	238.457	33.4671
10.57	227.699	73.3362	238.411	33.4671
10.6	227.544	73.4912	238.364	33.4671
10.63	227.435	73.4912	238.302	33.4671
10.67	227.28	73.4912	238.239	33.3115
10.7	227.094	73.6463	238.193	33.1558
10.73	226.924	73.9564	238.13	33.0002
10.77	226.784	74.1114	238.084	32.6888
10.8	226.629	74.2665	238.021	32.5332
10.83	226.505	74.4215	237.975	32.2219
10.87	226.427	74.2665	237.897	32.0662
10.9	226.288	74.2665	237.819	31.7549
10.93	226.086	74.2665	237.757	31.7549
10.97	225.885	74.2665	237.71	31.5992
11	225.73	74.2665	237.648	31.4435
11.03	225.621	74.2665	237.601	31.2879
11.07	225.466	74.4215	237.554	30.9766
11.1	225.311	74.4215	237.508	30.8209
11.13	225.156	74.5766	237.446	30.5096
11.17	225.017	74.4215	237.399	30.1983
11.2	224.893	74.4215	237.352	29.8869
11.23	224.753	74.4215	237.29	29.5756
11.27	224.613	74.2665	237.243	29.42
11.3	224.443	74.2665	237.212	29.1086
11.33	224.272	74.2665	237.165	28.7973
11.37	224.164	74.2665	237.103	28.6416
11.4	224.055	74.2665	237.041	28.3303
11.43	223.916	74.1114	236.978	28.1747
11.47	223.776	73.9564	236.932	28.1747
11.5	223.637	73.8013	236.869	28.019
11.53	223.513	73.4912	236.823	28.019
11.57	223.373	73.3362	236.729	27.8633
11.6	223.249	73.1811	236.652	28.019
11.63	223.125	72.8711	236.605	27.8633
11.67	223.017	72.716	236.558	27.8633
11.7	222.877	72.4059	236.496	27.8633
11.73	222.722	72.0958	236.418	27.8633
11.77	222.598	71.7857	236.371	27.8633
11.8	222.489	71.3206	236.325	27.8633
11.83	222.303	71.1656	236.262	28.019
11.87	222.117	70.8555	236.216	28.019
11.9	221.947	70.8555	236.169	28.019
11.93	221.792	70.7004	236.107	28.019
11.97	221.683	70.5454	236.06	28.019
12	221.559	70.3903	235.982	28.019
12.03	221.404	70.2353	235.92	28.019
12.07	221.187	70.3903	235.873	28.019
12.1	220.799	70.8555	235.842	28.019
12.13	220.319	72.0958	235.796	28.019
12.17	219.947	73.4912	235.733	27.8633
12.2	219.652	75.0417	235.686	27.8633
12.23						0
12.23	219.404	76.7472	235.546	28.019		500
12.27	219.171	78.4527	235.297	28.6416
12.3	218.954	80.4683	234.955	29.5756
12.33	218.768	82.3288	234.628	31.1322
12.37	218.536	84.3444	234.363	32.8445
12.4	218.334	86.2049	234.145	34.8681
12.43	218.195	88.0655	233.959	36.8917
12.47	218.024	89.7709	233.787	39.0709
12.5	217.853	91.4764	233.601	41.2502
12.53	217.683	92.8718	233.445	43.5851
12.57	217.497	94.4223	233.274	45.92
12.6	217.28	95.8177	233.118	48.2549
12.63	217.047	97.3681	232.962	50.4342
12.67	216.83	98.9186	232.838	52.7691
12.7	216.582	100.469	232.698	54.9484
12.73	216.365	101.864	232.573	56.972
12.77	216.163	103.105	232.433	59.1512
12.8	215.993	104.345	232.278	61.1748
12.83	215.853	105.275	232.153	63.0428
12.87	215.698	106.051	232.029	64.9107
12.9	215.481	106.671	231.888	66.623
12.93	215.264	107.291	231.779	68.3352
12.97	215.047	107.756	231.655	69.8918
13	214.799	108.221	231.515	71.2928
13.03	214.566	108.531	231.359	72.6937
13.07	214.381	108.686	231.219	73.939
13.1	214.256	108.531	231.079	75.0287
13.13	214.086	108.066	230.939	76.1183
13.17	213.853	107.601	230.799	76.8966
13.2	213.621	107.136	230.674	77.6749
13.23	213.419	106.671	230.519	78.1419
13.27	213.202	106.051	230.41	78.4532
13.3	212.985	105.12	230.269	78.6089
13.33	212.752	104.19	230.129	78.6089
13.37	212.582	102.95	229.989	78.2975
13.4	212.411	101.709	229.849	77.9862
13.43	212.241	100.624	229.709	77.3636
13.47	212.07	100.004	229.569	76.4296
13.5	211.869	99.6938	229.445	75.34
13.53	211.683	99.3837	229.335	73.939
13.57	211.528	99.2287	229.211	72.3824
13.6	211.388	99.0736	229.071	70.9815
13.63	211.186	98.9186	228.931	70.0475
13.67	210.939	98.9186	228.806	69.2692
13.7	210.69	98.9186	228.682	68.6466
13.73	210.489	99.0736	228.542	68.3352
13.77	210.303	99.0736	228.386	68.0239
13.8	210.101	99.0736	228.246	67.7126
13.83	209.915	98.9186	228.121	67.5569
13.87	209.729	98.7635	227.997	67.4013
13.9	209.559	98.4535	227.888	67.2456
13.93	209.419	98.1434	227.763	67.2456
13.97	209.264	97.6782	227.608	67.0899
14	209.093	97.3681	227.452	67.0899
14.03	208.907	97.058	227.312	67.0899
14.07	208.69	96.903	227.172	67.0899
14.1	208.473	96.903	227.047	67.0899
14.13	208.272	96.748	226.923	67.2456
14.17	208.101	96.4379	226.783	67.2456
14.2	207.931	96.1278	226.643	67.2456
14.23	207.698	95.8177	226.487	67.2456
14.27	207.481	95.6626	226.347	67.2456
14.3	207.248	95.5076	226.207	67.2456
14.33	207.093	95.5076	226.067	67.2456
14.37	206.907	95.5076	225.958	67.2456
14.4	206.737	95.5076	225.833	67.2456
14.43	206.582	95.1975	225.709	67.2456
14.47	206.334	95.0425	225.569	67.2456
14.5	206.132	95.0425	225.444	67.2456
14.53	205.993	94.8874	225.304	67.0899
14.57	205.791	94.8874	225.179	67.2456
14.6	205.574	94.8874	225.07	67.0899
14.63	205.326	95.0425	224.946	66.9343
14.67	205.109	95.3526	224.806	66.9343
14.7	204.907	95.6626	224.666	66.9343
14.73	204.752	95.8177	224.526	66.9343
14.77	204.613	95.9727	224.37	66.9343
14.8	204.427	95.9727	224.245	66.9343
14.83	204.225	95.9727	224.121	66.9343
14.87	204.024	96.1278	224.012	66.9343
14.9	203.806	96.1278	223.856	66.9343
14.93	203.589	96.1278	223.716	66.7786
14.97	203.419	95.9727	223.592	66.7786
15	203.248	95.9727	223.467	66.7786
15.03	203.016	96.2828	223.327	66.623
15.07	202.814	96.4379	223.187	66.623
15.1	202.675	96.5929	223.062	66.623
15.13	202.504	96.5929	222.938	66.623
15.17	202.303	96.748	222.813	66.4673
15.2	202.101	96.903	222.689	66.4673
15.23	201.93	96.903	222.564	66.3116
15.27	201.729	96.903	222.455	66.0003
15.3	201.527	96.903	222.346	65.8447
15.33	201.372	96.5929	222.222	65.689
15.37	201.233	96.2828	222.113	65.5333
15.4	201.016	96.1278	221.973	65.3777
15.43	200.768	96.1278	221.817	65.222
15.47	200.504	96.1278	221.693	65.0663
15.5	200.271	96.2828	221.63	64.755
15.53							0
15.53	200.008	96.4379	221.584	64.4437			500
15.57	199.698	96.903	221.506	63.9767
15.6	199.45	97.5232	221.428	63.5097
15.63	199.217	98.1434	221.303	63.0428
15.67	198.953	98.9186	221.148	62.7314
15.7	198.659	99.6938	220.992	62.4201
15.73	198.38	100.624	220.852	62.1088
15.77	198.07	101.709	220.696	61.9531
15.8	197.775	102.95	220.541	61.7975
15.83	197.527	104.19	220.385	61.6418
15.87	197.248	105.43	220.245	61.6418
15.9	196.938	106.826	220.105	61.6418
15.93	196.612	108.376	219.965	61.6418
15.97	196.302	110.082	219.825	61.6418
16	195.946	112.097	219.685	61.6418
16.03	195.651	114.113	219.529	61.7975
16.07	195.341	116.129	219.389	61.9531
16.1	195.077	117.989	219.233	62.1088
16.13	194.814	119.85	219.109	62.4201
16.17	194.519	121.71	218.953	62.7314
16.2	194.209	123.726	218.813	63.0428
16.23	193.93	125.586	218.657	63.3541
16.27	193.636	127.602	218.501	63.8211
16.3	193.341	129.462	218.346	64.288
16.33	193.046	131.323	218.159	64.755
16.37	192.752	133.028	217.988	65.3777
16.4	192.442	134.889	217.817	66.156
16.43	192.116	136.595	217.677	66.9343
16.47	191.79	138.3	217.505	67.5569
16.5	191.465	140.006	217.365	68.3352
16.53	191.108	141.556	217.241	69.1135
16.57	190.783	143.106	217.101	69.7362
16.6	190.519	144.502	216.96	70.3588
16.63	190.225	145.742	216.805	70.9815
16.67	189.945	146.827	216.665	71.6041
16.7	189.682	147.448	216.54	72.0711
16.73	189.387	148.068	216.4	72.6937
16.77	189.062	148.533	216.244	73.1607
16.8	188.736	148.998	216.089	73.7834
16.83	188.411	149.618	215.917	74.2504
16.87	188.131	149.928	215.777	74.5617
16.9	187.837	150.393	215.622	74.7173
16.93	187.527	150.704	215.482	74.7173
16.97	187.186	151.014	215.326	74.873
17	186.875	151.169	215.186	74.873
17.03	186.581	151.324	214.999	74.873
17.07	186.302	151.479	214.844	74.873
17.1	185.976	151.634	214.688	75.0287
17.13	185.666	151.789	214.548	75.1843
17.17	185.356	151.944	214.392	75.1843
17.2	185.03	151.944	214.221	75.34
17.23	184.689	152.099	214.081	75.4956
17.27	184.395	152.254	213.925	75.4956
17.3	184.1	152.409	213.769	75.6513
17.33	183.79	152.719	213.629	75.6513
17.37	183.48	153.029	213.474	75.6513
17.4	183.17	153.339	213.334	75.6513
17.43	182.86	153.494	213.178	75.6513
17.47	182.565	153.649	213.022	75.6513
17.5	182.24	153.649	212.867	75.6513
17.53	181.945	153.804	212.726	75.4956
17.57	181.65	153.804	212.571	75.4956
17.6	181.34	153.804	212.431	75.4956
17.63	180.999	153.959	212.275	75.34
17.67	180.72	153.804	212.119	75.34
17.7	180.426	153.804	211.933	75.4956
17.73	180.131	153.649	211.777	75.6513
17.77	179.852	153.494	211.621	75.807
17.8	179.557	153.494	211.481	76.1183
17.83	179.216	153.494	211.341	76.1183
17.87	178.922	153.494	211.201	76.274
17.9	178.643	153.649	211.077	76.274
17.93	178.333	153.649	210.921	76.274
17.97	177.991	153.649	210.781	76.274
18	177.635	153.649	210.641	76.1183
18.03	177.263	153.804	210.485	76.1183
18.07	176.968	153.959	210.329	75.9626
18.1	176.658	153.959	210.174	75.807
18.13	176.348	154.114	210.034	75.807
18.17	176.038	154.27	209.909	75.6513
18.2	175.743	154.27	209.753	75.4956
18.23	175.402	154.425	209.613	75.34
18.27	175.092	154.58	209.442	75.1843
18.3	174.798	154.58	209.271	75.1843
18.33	174.503	154.735	209.131	75.0287
18.37	174.208	154.735	208.975	75.0287
18.4	173.898	154.735	208.804	75.0287
18.43	173.526	154.89	208.648	75.0287
18.47	173.216	155.045	208.493	75.0287
18.5	172.891	155.2	208.321	75.0287
18.53	172.596	155.355	208.166	75.1843
18.57								0
18.57	172.363	155.355	208.041	75.1843				500
18.6	172.131	155.2	207.87	75.1843
18.63	171.883	155.045	207.745	75.1843
18.67	171.619	154.735	207.621	75.1843
18.7	171.325	154.425	207.45	75.1843
18.73	171.045	153.959	207.294	75.1843
18.77	170.735	153.649	207.107	75.34
18.8	170.425	153.339	206.905	75.4956
18.83	170.084	153.184	206.702	75.807
18.87	169.712	153.029	206.469	76.1183
18.9	169.371	153.029	206.251	76.5853
18.93	169.03	153.029	206.033	77.2079
18.97	168.689	153.184	205.8	77.9862
19	168.363	153.184	205.55	78.7645
19.03	168.038	153.339	205.317	79.8542
19.07	167.712	153.494	205.083	80.9438
19.1	167.371	153.494	204.834	82.1891
19.13	167.061	153.649	204.601	83.4344
19.17	166.735	153.804	204.352	84.8353
19.2	166.394	153.959	204.118	86.2363
19.23	166.022	154.114	203.869	87.7929
19.27	165.696	154.425	203.62	89.3495
19.3	165.371	154.58	203.371	90.9061
19.33	165.045	155.045	203.122	92.4627
19.37	164.704	155.51	202.842	94.175
19.4	164.363	156.13	202.562	96.0429
19.43	164.037	156.75	202.313	97.9108
19.47	163.712	157.215	202.079	99.6231
19.5	163.386	157.836	201.846	101.335
19.53	163.076	158.301	201.597	103.048
19.57	162.689	159.076	201.363	104.76
19.6	162.301	159.851	201.145	106.317
19.63	161.991	160.626	200.896	107.873
19.67	161.634	161.402	200.663	109.43
19.7	161.293	162.177	200.414	110.986
19.73	160.999	162.797	200.149	112.387
19.77	160.688	163.572	199.916	113.788
19.8	160.378	164.192	199.635	115.189
19.83	160.006	164.968	199.371	116.59
19.87	159.65	165.898	199.122	117.991
19.9	159.293	166.518	198.888	119.081
19.93	158.967	167.138	198.655	120.015
19.97	158.595	167.448	198.406	120.949
20	158.285	167.758	198.157	121.571
20.03	157.944	167.913	197.923	122.038
20.07	157.556	168.224	197.705	122.35
20.1	157.2	168.379	197.441	122.661
20.13	156.859	168.534	197.191	122.972
20.17	156.518	168.689	196.942	123.128
20.2	156.192	168.844	196.709	123.128
20.23	155.867	168.999	196.444	123.284
20.27	155.541	169.154	196.195	123.284
20.3	155.231	169.154	195.977	123.284
20.33	154.89	169.309	195.744	123.284
20.37	154.549	169.464	195.526	123.128
20.4	154.223	169.464	195.277	122.972
20.43	153.898	169.464	195.028	122.972
20.47	153.572	169.464	194.779	122.817
20.5	153.246	169.309	194.514	122.661
20.53	152.921	169.154	194.265	122.661
20.57	152.595	169.154	194.016	122.505
20.6	152.285	168.999	193.751	122.505
20.63	151.944	168.844	193.534	122.35
20.67	151.618	168.689	193.253	122.35
20.7	151.231	168.689	193.02	122.35
20.73	150.843	168.689	192.771	122.35
20.77	150.518	168.689	192.537	122.505
20.8	150.192	168.534	192.304	122.505
20.83	149.866	168.534	192.039	122.505
20.87	149.541	168.224	191.806	122.661
20.9	149.231	168.069	191.572	122.505
20.93	148.921	168.069	191.323	122.505
20.97	148.579	167.913	191.09	122.505
21	148.238	167.913	190.872	122.35
21.03	147.928	167.758	190.654	122.194
21.07	147.587	167.603	190.405	122.038
21.1	147.231	167.448	190.14	121.883
21.13	146.905	167.138	189.891	121.883
21.17	146.548	166.983	189.657	121.883
21.2	146.192	166.983	189.424	121.727
21.23	145.851	166.828	189.206	121.727
21.27	145.51	166.828	188.957	121.571
21.3	145.168	166.828	188.708	121.571
21.33	144.843	166.828	188.459	121.571
21.37	144.533	166.828	188.21	121.416
21.4	144.207	166.828	187.976	121.416
21.43	143.866	166.983	187.758	121.26
21.47	143.525	166.983	187.525	121.104
21.5	143.184	167.138	187.276	121.104
21.53	142.827	167.293	187.027	120.949
21.57	142.486	167.448	186.793	120.949
21.6	142.161	167.603	186.544	120.793
21.63	141.82	167.758	186.311	120.793
21.67	141.463	167.758	186.093	120.637
21.7	141.122	167.913	185.875	120.326
21.73	140.781	168.069	185.657	120.17
21.77	140.44	168.224	185.439	119.859
21.8	140.052	168.534	185.19	119.548
21.83	139.711	168.689	184.941	119.392
21.87	139.354	168.844	184.692	119.236
21.9	139.029	168.999	184.458	119.081
21.93	138.719	169.154	184.225	118.925
21.97	138.409	169.154	183.96	118.925
22	138.098	168.999	183.742	118.769
22.03	137.788	168.999	183.524	118.614
22.07	137.447	168.999	183.291	118.614
22.1	137.122	169.154	183.058	118.458
22.13	136.78	169.154	182.824	118.458
22.17	136.393	169.154	182.59	118.302
22.2	136.021	169.309	182.357	118.302
22.23	135.711	169.464	182.139	118.147
22.27	135.385	169.309	181.906	117.991
22.3	135.075	169.309	181.672	117.991
22.33	134.734	169.309	181.454	117.68
22.37	134.408	169.154	181.221	117.524
22.4	134.067	168.999	180.956	117.368
22.43	133.788	168.844	180.738	117.368
22.47	133.509	168.379	180.52	117.213
22.5	133.199	168.069	180.302	117.057
22.53	132.889	167.758	180.084	116.901
22.57	132.517	167.603	179.882	116.59
22.6	132.191	167.293	179.664	116.434
22.63	131.912	166.983	179.446	116.123
22.67	131.633	166.518	179.228	115.812
22.7	131.339	166.053	179.026	115.656
22.73	131.044	165.433	178.823	115.345
22.77	130.749	164.813	178.606	115.034
22.8	130.455	164.037	178.388	114.567
22.83	130.176	163.417	178.17	114.255
22.87	129.865	162.642	177.936	113.944
22.9	129.555	162.022	177.703	113.788
22.93	129.214	161.247	177.485	113.477
22.97	128.889	160.626	177.267	113.321
23	128.579	160.161	177.065	113.01
23.03	128.3	159.386	176.847	112.699
23.07	128.005	158.766	176.644	112.232
23.1	127.679	158.301	176.473	111.765
23.13	127.369	157.836	176.286	111.298
23.17	127.075	157.37	176.084	110.831
23.2	126.78	156.905	175.866	110.364
23.23	126.517	156.44	175.648	109.897
23.27	126.237	155.82	175.43	109.43
23.3	125.927	155.2	175.243	109.118
23.33	125.633	154.735	175.056	108.651
23.37	125.338	153.959	174.823	108.184
23.4	125.028	153.494	174.605	107.873
23.43	124.734	152.874	174.387	107.562
23.47	124.439	152.254	174.185	107.251
23.5	124.129	151.944	173.967	106.939
23.53	123.819	151.634	173.764	106.628
23.57	123.555	151.324	173.547	106.317
23.6	123.292	151.014	173.329	106.005
23.63	123.028	150.548	173.126	105.85
23.67	122.734	150.238	172.924	105.538
23.7	122.423	149.928	172.722	105.383
23.73	122.129	149.773	172.519	105.227
23.77	121.834	149.463	172.317	105.071
23.8	121.54	149.153	172.13	104.916
23.83	121.245	148.843	171.928	104.76
23.87	120.951	148.533	171.71	104.604
23.9	120.64	148.378	171.492	104.449
23.93	120.346	148.378	171.29	104.293
23.97	120.036	148.378	171.087	104.293
24	119.726	148.223	170.885	104.137
24.03	119.462	148.068	170.698	103.982
24.07	119.167	147.913	170.511	103.67
24.1	118.857	147.758	170.324	103.515
24.13	118.594	147.603	170.122	103.203
24.17	118.315	147.293	169.92	103.048
24.2	118.02	147.137	169.733	102.736
24.23	117.741	146.827	169.53	102.581
24.27	117.446	146.672	169.344	102.425
24.3	117.167	146.517	169.141	102.425
24.33	116.857	146.362	168.939	102.269
24.37	116.563	146.362	168.721	102.114
24.4	116.268	146.207	168.488	102.114
24.43	115.989	146.207	168.285	101.958
24.47	115.694	146.207	168.083	101.958
24.5	115.415	146.207	167.896	101.802
24.53	115.105	146.207	167.709	101.491
24.57	114.826	146.052	167.523	101.335
24.6	114.532	146.052	167.336	101.18
24.63	114.252	145.897	167.133	101.024
24.67	113.942	145.897	166.947	100.713
24.7	113.632	145.897	166.76	100.401
24.73	113.338	145.897	166.557	100.246
24.77	113.043	145.897	166.386	100.09
24.8	112.749	145.897	166.184	99.7788
24.83	112.469	146.052	166.013	99.6231
24.87	112.175	146.052	165.81	99.3118
24.9	111.927	146.052	165.592	99.1561
24.93	111.648	146.052	165.374	99.1561
24.97	111.353	145.897	165.203	99.0005
25	111.043	145.742	165.016	98.8448
25.03	110.733	145.742	164.814	98.6892
25.07	110.469	145.587	164.643	98.5335
25.1	110.144	145.587	164.456	98.3778
25.13	109.849	145.587	164.269	98.2222
25.17	109.555	145.587	164.067	98.0665
25.2	109.26	145.587	163.88	97.7552
25.23	108.981	145.587	163.693	97.7552
25.27	108.686	145.587	163.522	97.5995
25.3	108.376	145.587	163.335	97.4439
25.33	108.097	145.742	163.133	97.2882
25.37	107.803	145.742	162.946	97.1325
25.4	107.524	145.897	162.759	96.9769
25.43	107.245	145.897	162.557	96.6656
25.47	106.981	145.897	162.339	96.6656
25.5	106.717	145.742	162.168	96.5099
25.53	106.423	145.587	161.965	96.3542
25.57	106.097	145.587	161.794	96.1986
25.6	105.818	145.587	161.607	95.8873
25.63	105.555	145.432	161.421	95.7316
25.67	105.26	145.277	161.249	95.5759
25.7	104.965	145.277	161.078	95.2646
25.73	104.671	145.122	160.891	95.2646
25.77	104.392	144.967	160.704	95.1089
25.8	104.082	144.967	160.533	94.9533
25.83	103.802	144.967	160.346	94.7976
25.87	103.539	144.812	160.175	94.642
25.9	103.26	144.657	160.004	94.4863
25.93	102.981	144.502	159.817	94.3306
25.97	102.655	144.347	159.631	94.0193
26	102.361	144.347	159.413	94.0193
26.03	102.082	144.347	159.195	93.8637
26.07	101.818	144.192	158.992	93.8637
26.1	101.508	144.192	158.805	93.8637
26.13	101.213	144.192	158.619	93.708
26.17	100.903	144.192	158.432	93.708
26.2	100.624	144.192	158.261	93.5523
26.23	100.345	144.192	158.089	93.5523
26.27	100.05	144.037	157.918	93.5523
26.3	99.7713	144.037	157.731	93.3967
26.33	99.4923	143.882	157.576	93.3967
26.37	99.2132	143.882	157.405	93.241
26.4	98.8876	143.882	157.233	93.0854
26.43	98.6085	143.882	157.062	92.774
26.47	98.3294	143.882	156.891	92.6184
26.5	98.0658	143.882	156.735	92.4627
26.53	97.7868	143.726	156.548	92.1514
26.57	97.5077	143.726	156.346	91.9957
26.6	97.2286	143.726	156.128	91.8401
26.63	96.934	143.726	155.972	91.6844
26.67	96.6549	143.726	155.786	91.5287
26.7	96.3759	143.726	155.583	91.3731
26.73	96.0813	143.726	155.397	91.3731
26.77	95.8022	143.571	155.241	91.2174
26.8	95.5076	143.571	155.07	91.2174
26.83	95.1975	143.571	154.883	91.0618
26.87	94.9339	143.416	154.712	91.0618
26.9	94.6549	143.416	154.525	90.9061
26.93	94.3603	143.261	154.354	90.9061
26.97	94.0657	143.261	154.182	90.7504
27	93.7711	143.261	154.027	90.5948
27.03	93.523	143.106	153.84	90.4391
27.07	93.337	142.951	153.684	90.2835
27.1	93.1819	142.331	153.513	90.1278
27.13	92.9494	141.866	153.342	89.8165
27.17	92.6548	141.401	153.28	89.3495
27.2	92.2982	140.936	153.171	88.8825
27.23	91.9106	140.781	153.093	88.1042
27.27	91.4609	140.781	153.015	87.1702
27.3	91.0268	141.246	152.89	86.2363
27.33	90.5927	142.021	152.735	85.3023
27.37	90.1741	142.951	152.564	84.524
27.4	89.7399	144.037	152.361	83.9013
27.43	89.2903	145.277	152.159	83.4344
27.47	88.8407	146.982	151.925	83.123
27.5	88.391	148.843	151.692	82.8117
27.53	87.9569	150.859	151.458	82.8117
27.57	87.4918	153.184	151.225	82.8117
27.6	87.0732	155.51	151.007	82.9674
27.63	86.6545	157.991	150.758	83.2787
27.67	86.2204	160.471	150.509	83.59
27.7	85.7708	163.107	150.26	84.2127
27.73	85.3522	165.898	149.995	84.8353
27.77	84.9335	168.689	149.777	85.458
27.8	84.4994	171.635	149.559	86.2363
27.83	84.0653	174.425	149.341	87.0146
27.87	83.6312	177.371	149.108	87.7929
27.9	83.197	180.317	148.89	88.7268
27.93	82.7629	183.108	148.656	89.8165
27.97	82.3443	186.054	148.438	90.9061
28	81.9257	188.845	148.236	91.9957
28.03	81.5071	191.48	148.003	93.241
28.07	81.0729	194.116	147.754	94.642
28.1	80.6543	196.752	147.52	95.8873
28.13	80.1737	199.388	147.287	97.2882
28.17	79.755	201.868	147.053	98.6892
28.2	79.3674	204.194	146.788	100.246
28.23	78.9643	206.21	146.555	101.802
28.27	78.5612	208.225	146.353	103.203
28.3	78.1581	209.931	146.119	104.76
28.33	77.7395	211.481	145.901	106.161
28.37	77.3208	212.876	145.683	107.562
28.4	76.8712	213.807	145.465	108.963
28.43	76.4061	214.427	145.247	110.208
28.47	75.9875	214.737	145.03	111.609
28.5	75.5688	214.737	144.811	112.543
28.53	75.1657	214.427	144.594	113.321
28.57	74.7626	214.117	144.36	113.944
28.6	74.344	213.807	144.127	114.411
28.63	73.9254	213.497	143.878	114.567
28.67	73.5222	213.187	143.644	114.722
28.7	73.0881	212.876	143.411	114.722
28.73	72.6385	212.566	143.193	114.567
28.77	72.2354	212.256	142.975	114.411
28.8	71.8323	211.946	142.757	114.255
28.83	71.4136	211.791	142.539	114.1
28.87	70.9795	211.481	142.321	113.944
28.9	70.5609	211.326	142.088	113.788
28.93	70.1423	211.171	141.854	113.633
28.97	69.7237	211.016	141.652	113.477
29	69.3205	210.861	141.434	113.321
29.03	68.8864	210.706	141.231	113.166
29.07	68.4678	210.551	141.013	113.01
29.1	68.0337	210.396	140.749	113.01
29.13	67.615	210.396	140.546	112.854
29.17	67.2119	210.241	140.328	112.854
29.2	66.7933	210.086	140.111	112.699
29.23	66.3747	210.086	139.908	112.543
29.27	65.9716	209.931	139.675	112.387
29.3	65.5374	209.931	139.457	112.232
29.33	65.0878	209.931	139.239	111.92
29.37	64.6847	209.776	139.036	111.765
29.4	64.2661	209.776	138.834	111.453
29.43	63.863	209.776	138.616	111.298
29.47	63.4598	209.776	138.398	110.986
29.5	63.0412	209.776	138.196	110.831
29.53	62.6226	209.776	137.978	110.675
29.57	62.235	209.621	137.729	110.519
29.6	61.8009	209.621	137.495	110.519
29.63	61.3357	209.465	137.278	110.364
29.67	60.9171	209.465	137.075	110.364
29.7	60.4985	209.31	136.873	110.208
29.73	60.0954	209.31	136.655	110.052
29.77	59.6923	209.31	136.437	109.897
29.8	59.2891	209.31	136.235	109.585
29.83	58.8705	209.31	136.017	109.43
29.87	58.4674	209.155	135.799	109.274
29.9	58.0333	209.155	135.596	108.963
29.93	57.5991	209.155	135.379	108.807
29.97	57.196	209	135.176	108.651
30	56.7774	209	134.974	108.496
30.03	56.3743	208.845	134.74	108.34
30.07	55.9557	208.845	134.491	108.34
30.1	55.5526	208.845	134.273	108.34
30.13	55.1494	208.69	134.071	108.184
30.17	54.7308	208.535	133.884	108.029
30.2	54.3277	208.38	133.666	108.029
30.23	53.8781	208.38	133.464	107.873
30.27	53.4905	208.225	133.262	107.718
30.3	53.1494	208.07	133.059	107.562
30.33	52.9013	207.45	132.841	107.562
30.37	52.6377	206.675	132.701	107.251
30.4	52.2966	205.744	132.592	106.784
30.43	51.909	204.969	132.499	106.161
30.47	51.5059	204.039	132.436	105.227
30.5	51.0718	203.419	132.327	104.293
30.53	50.6221	202.644	132.187	103.203
30.57	50.1105	202.333	132.016	102.114
30.6	49.6609	201.868	131.829	101.024
30.63	49.2112	201.713	131.627	100.09
30.67	48.7616	201.558	131.362	99.1561
30.7	48.2965	201.558	131.144	98.3778
30.73	47.8468	201.713	130.927	97.5995
30.77	47.3817	201.868	130.709	96.9769
30.8	46.9166	202.178	130.491	96.3542
30.83	46.4049	202.644	130.273	95.8873
30.87	45.9398	203.264	130.055	95.4203
30.9	45.4746	203.884	129.837	94.9533
30.93	45.0405	204.504	129.619	94.7976
30.97	44.5754	205.279	129.417	94.642
31	44.1258	206.21	129.199	94.4863
31.03	43.6606	207.14	128.981	94.3306
31.07	43.1955	208.225	128.763	94.3306
31.1	42.6993	209.31	128.56	94.4863
31.13	42.2497	210.396	128.311	94.642
31.17	41.8001	211.481	128.109	94.7976
31.2	41.3505	212.566	127.891	95.1089
31.23	40.9008	213.807	127.689	95.2646
31.27	40.4512	215.047	127.471	95.7316
31.3	39.9861	216.287	127.269	96.0429
31.33	39.5364	217.528	127.051	96.5099
31.37	39.0403	218.923	126.848	96.9769
31.4	38.5907	220.164	126.646	97.5995
31.43	38.1255	221.559	126.412	98.3778
31.47	37.6759	222.799	126.195	99.1561
31.5	37.2108	224.195	125.977	99.9344
31.53	36.7611	225.435	125.759	100.713
31.57	36.3115	226.675	125.541	101.647
31.6	35.8619	227.916	125.292	102.736
31.63	35.3812	229.001	125.058	103.826
31.67	34.9161	229.776	124.856	104.916
31.7	34.4665	230.242	124.653	106.005
31.73	34.0013	230.397	124.451	106.784
31.77	33.5362	230.552	124.264	107.406
31.8	33.1021	230.397	124.062	107.718
31.83	32.6524	230.242	123.844	107.873
31.87	32.2028	230.087	123.642	107.873
31.9	31.7222	230.087	123.408	107.718
31.93	31.257	230.087	123.206	107.562
31.97	30.7919	229.931	122.988	107.406
32	30.3733	229.776	122.77	107.406
32.03	29.9392	229.621	122.568	107.251
32.07	29.474	229.466	122.35	107.251
32.1	29.0244	229.156	122.101	107.251
32.13	28.6058	229.001	121.898	107.251
32.17	28.1561	228.691	121.696	107.095
32.2	27.6755	228.691	121.493	107.095
32.23	27.2414	228.536	121.276	107.095
32.27	26.8072	228.226	121.073	107.095
32.3	26.3576	228.071	120.871	106.939
32.33	25.9235	227.761	120.668	106.784
32.37	25.4894	227.451	120.466	106.784
32.4	25.0242	227.296	120.248	106.628
32.43	24.5901	226.986	120.046	106.472
32.47	24.1405	226.831	119.844	106.317
32.5	23.7064	226.52	119.626	106.317
32.53	23.2877	226.21	119.423	106.161
32.57	22.8536	225.9	119.19	106.161
32.6	22.4195	225.435	118.956	106.161
32.63	21.9854	225.125	118.738	106.005
32.67	21.5357	224.66	118.536	106.005
32.7	21.1016	224.35	118.334	105.85
32.73	20.652	224.04	118.147	105.694
32.77	20.2178	223.73	117.929	105.694
32.8	19.7837	223.42	117.742	105.538
32.83	19.3651	222.954	117.54	105.383
32.87	18.931	222.644	117.322	105.227
32.9	18.4968	222.179	117.135	105.071
32.93	18.0627	221.869	116.933	105.071
32.97	17.6441	221.404	116.715	104.916
33	17.2255	221.094	116.497	104.916

## Sheet: 3 mg.ml primary data n=3
Time [min]	1A: O2 Concentration [nmol/ml]	1A: O2 Slope uncorr. [pmol/(s*ml)]	1B: O2 Concentration [nmol/ml]	1B: O2 Slope uncorr. [pmol/(s*ml)]	mitos	NADH	ADP	cyt c
0	122.346		117.182
0.03	136.284		129.417
0.07	165.696		153.871
0.1	194.039		180.505
0.13	214.97	-12150.1	202.655	-11101.8
0.17	228.8	-11715.2	218.579	-11355.5
0.2	237.312	-8899.57	229.118	-9428.39
0.23	242.444	-5957.6	235.811	-6853.76
0.27	245.498	-3735.03	239.983	-4594.34
0.3	247.281	-7322.15	242.598	-7497.42
0.33	248.382	-5843.02	244.248	-6248.39
0.37	249.079	-4083.73	245.26	-4664.54
0.4	249.452	-2631.42	245.945	-3212.53
0.43	249.7	-1623.01	246.427	-2103.45
0.47	249.886	-4209.93	246.738	-4485.69
0.5	250.01	-3223.69	246.972	-3571.33
0.53	250.087	-2209.54	247.143	-2602.03
0.57	250.134	-1412.77	247.221	-1772.82
0.6	250.165	-870.732	247.283	-1158.27
0.63	250.227	-2657.78	247.361	-2884.87
0.67	250.289	-2004.11	247.439	-2258.49
0.7	250.289	-1364.24	247.486	-1630.86
0.73	250.289	-870.887	247.501	-1107.84
0.77	250.351	-538.161	247.532	-724.758
0.8	250.413	-1816.19	247.564	-1991.06
0.83	250.397	-1359.12	247.61	-1546.03
0.87	250.413	-922.672	247.641	-1112.04
0.9	250.366	-589.17	247.657	-755.112
0.93	250.335	-364.665	247.672	-495.158
0.97	250.335	-1315.09	247.688	-1451.7
1	250.397	-979.573	247.688	-1122.01
1.03	250.397	-663.592	247.688	-805.391
1.07	250.366	-423.582	247.719	-546.838
1.1	250.32	-262.336	247.75	-359.422
1.13	250.273	-994.302	247.781	-1103.64
1.17	250.258	-737.858	247.797	-850.532
1.2	250.242	-498.779	247.781	-610.036
1.23	250.242	-317.687	247.766	-414.526
1.27	250.273	-196.442	247.766	-273.03
1.3	250.304	-776.775	247.781	-866.721
1.33	250.304	-575.061	247.781	-666.541
1.37	250.304	-388.232	247.781	-477.568
1.4	250.289	-247.297	247.797	-324.709
1.43	250.258	-152.874	247.797	-214.19
1.47	250.242	-93.337	247.797	-139.939
1.5	250.227	-57.0565	247.812	-92.1514
1.53	250.227	-35.0401	247.828	-61.9531
1.57	250.289	-22.0164	247.828	-42.8068
1.6	250.289	-13.954	247.828	-30.5096
1.63	250.227	-8.8376	247.812	-22.4152
1.67	250.196	-5.5816	247.812	-17.1227
1.7	250.18	-3.2559	247.828	-13.5425
1.73	250.134	-1.5504	247.828	-10.8963
1.77	250.103	-0.3101	247.828	-9.0283
1.8	250.087	0.7752	247.812	-7.6274
1.83	250.041	1.5504	247.797	-6.6934
1.87	250.056	2.3257	247.797	-5.7595
1.9	250.041	2.9459	247.781	-4.9812
1.93	250.072	3.566	247.797	-4.3585
1.97	250.087	3.8761	247.797	-3.7359
2	250.041	4.1862	247.797	-3.2689
2.03	250.041	4.4963	247.797	-2.9576
2.07	250.01	4.8064	247.812	-2.4906
2.1	249.979	5.1165	247.812	-2.1793
2.13	249.917	5.2715	247.828	-1.8679
2.17	249.901	5.5816	247.812	-1.7123
2.2	249.932	5.5816	247.797	-1.401
2.23	249.932	5.7367	247.781	-1.2453
2.27	249.901	6.0467	247.781	-0.934
2.3	249.87	6.2018	247.781	-0.7783
2.33	249.886	6.2018	247.781	-0.467
2.37	249.87	6.2018	247.781	-0.3113
2.4	249.87	6.2018	247.766	-0.1557
2.43	249.87	6.3568	247.75	0
2.47	249.87	6.5119	247.75	0.1557
2.5	249.824	6.6669	247.766	0.3113
2.53	249.808	6.822	247.75	0.3113
2.57	249.777	6.977	247.703	0.6226
2.6	249.777	7.1321	247.688	0.7783
2.63	249.793	7.1321	247.672	1.0896
2.67	249.777	7.1321	247.672	1.2453
2.7	249.777	6.977	247.672	1.5566
2.73	249.793	6.977	247.672	1.7123
2.77	249.793	6.822	247.672	1.8679
2.8	249.793	6.6669	247.688	2.0236
2.83	249.824	6.5119	247.688	2.0236
2.87	249.824	6.2018	247.657	2.1793
2.9	249.793	5.8917	247.657	2.1793
2.93	249.731	5.5816	247.657	2.3349
2.97	249.7	5.4266	247.657	2.3349
3	249.653	5.4266	247.657	2.4906
3.03	249.653	5.2715	247.672	2.4906
3.07	249.669	5.2715	247.672	2.4906
3.1	249.669	5.2715	247.657	2.4906
3.13	249.669	5.1165	247.657	2.4906
3.17	249.684	5.1165	247.657	2.4906
3.2	249.669	4.9614	247.641	2.4906
3.23	249.622	5.1165	247.641	2.4906
3.27	249.591	4.9614	247.626	2.6462
3.3	249.576	4.9614	247.626	2.6462
3.33	249.591	4.8064	247.61	2.6462
3.37	249.607	4.6513	247.61	2.6462
3.4	249.607	4.6513	247.61	2.6462
3.43	249.607	4.4963	247.61	2.6462
3.47	249.591	4.4963	247.61	2.4906
3.5	249.607	4.4963	247.61	2.3349
3.53	249.576	4.4963	247.61	2.3349
3.57	249.514	4.4963	247.61	2.1793
3.6	249.498	4.4963	247.595	2.1793
3.63	249.514	4.6513	247.61	2.0236
3.67	249.498	4.6513	247.626	2.0236
3.7	249.483	4.8064	247.61	1.8679
3.73	249.498	4.8064	247.61	1.7123
3.77	249.514	4.6513	247.595	1.7123
3.8	249.514	4.6513	247.579	1.5566
3.83	249.529	4.4963	247.564	1.5566
3.87	249.514	4.4963	247.548	1.401
3.9	249.467	4.4963	247.548	1.5566
3.93	249.452	4.6513	247.548	1.5566
3.97	249.452	4.6513	247.548	1.5566
4	249.452	4.6513	247.532	1.7123
4.03	249.421	4.6513	247.532	1.7123
4.07	249.436	4.6513	247.517	1.8679
4.1	249.405	4.6513	247.501	2.0236
4.13	249.421	4.4963	247.47	2.0236
4.17	249.452	4.3413	247.439	2.1793
4.2	249.405	4.0312	247.439	2.3349
4.23	249.374	4.0312	247.439	2.6462
4.27	249.374	3.8761	247.439	2.6462
4.3	249.39	3.8761	247.439	2.8019
4.33	249.374	3.8761	247.439	2.9576
4.37	249.374	4.0312	247.439	2.9576
4.4	249.374	3.8761	247.47	2.9576
4.43	249.343	3.8761	247.454	2.9576
4.47	249.312	3.8761	247.439	2.9576
4.5	249.312	3.8761	247.423	2.9576
4.53	249.312	3.8761	247.439	3.1132
4.57	249.312	3.8761	247.439	2.9576
4.6	249.312	3.8761	247.423	3.1132
4.63	249.312	4.0312	247.423	3.1132
4.67	249.328	3.8761	247.423	3.1132
4.7	249.312	3.8761	247.439	3.1132
4.73	249.297	3.7211	247.454	2.9576
4.77	249.281	3.7211	247.439	2.9576
4.8	249.25	3.7211	247.408	2.9576
4.83	249.219	3.7211	247.377	2.9576
4.87	249.203	3.7211	247.377	2.9576
4.9	249.188	3.8761	247.392	2.9576
4.93	249.173	4.0312	247.392	2.8019
4.97	249.157	4.1862	247.377	2.8019
5	249.157	4.3413	247.392	2.6462
5.03	249.142	4.4963	247.392	2.4906
5.07	249.157	4.6513	247.377	2.4906
5.1	249.157	4.6513	247.361	2.3349
5.13	249.142	4.6513	247.33	2.3349
5.17	249.126	4.6513	247.283	2.3349
5.2	249.142	4.4963	247.268	2.4906
5.23	249.157	4.4963	247.268	2.4906
5.27	249.111	4.4963	247.283	2.6462
5.3	249.126	4.4963	247.283	2.6462
5.33	249.142	4.4963	247.299	2.4906
5.37	249.157	4.4963	247.299	2.4906
5.4	249.142	4.3413	247.314	2.4906
5.43	249.111	4.3413	247.299	2.3349
5.47	249.111	4.3413	247.283	2.4906
5.5	249.111	4.1862	247.268	2.4906
5.53	249.095	4.0312	247.283	2.6462
5.57	249.095	4.0312	247.299	2.6462
5.6	249.111	3.8761	247.283	2.6462
5.63	249.126	3.7211	247.268	2.8019
5.67	249.079	3.7211	247.252	2.8019
5.7	249.064	3.566	247.252	2.8019
5.73	249.064	3.411	247.252	2.8019
5.77	249.079	3.411	247.237	2.8019
5.8	249.095	3.2559	247.221	2.8019
5.83	249.111	3.1009	247.205	2.9576
5.87	249.079	2.9459	247.205	2.9576
5.9	249.048	2.9459	247.19	2.9576
5.93	249.002	2.9459	247.19	3.1132
5.97	248.955	2.9459	247.19	3.1132
6	248.94	2.9459	247.19	3.1132
6.03	248.94	2.9459	247.19	3.1132
6.07	248.955	2.9459	247.174	2.9576
6.1	248.971	2.9459	247.174	2.9576
6.13	248.987	2.7908	247.159	2.9576
6.17	249.002	2.7908	247.159	2.9576
6.2	249.002	2.6358	247.159	2.9576
6.23	248.955	2.7908	247.159	2.9576
6.27	248.955	2.7908	247.159	2.8019
6.3	248.909	2.9459	247.159	2.8019
6.33	248.769	3.411	247.159	2.6462
6.37	248.568	4.0312	247.174	2.4906
6.4	248.351	5.1165	247.19	2.3349
6.43	248.149	6.5119	247.174	2.1793
6.47					0
6.47	247.979	8.0623	247.159	2.1793	500
6.5	247.839	9.9229	247.128	2.1793
6.53	247.715	11.7834	247.112	2.3349
6.57	247.56	13.6439	247.05	2.4906
6.6	247.436	15.8146	246.925	2.9576
6.63	247.312	17.9852	246.816	3.4245
6.67	247.157	20.3109	246.707	4.2029
6.7	246.986	22.6365	246.614	4.9812
6.73	246.816	25.1173	246.505	5.7595
6.77	246.661	27.753	246.412	6.8491
6.8	246.49	30.3888	246.334	7.9387
6.83	246.32	33.1796	246.287	9.184
6.87	246.165	35.9704	246.256	10.118
6.9	245.979	38.9162	246.225	11.2076
6.93	245.855	41.7071	246.162	12.2972
6.97	245.715	44.4979	246.1	13.3869
7	245.607	47.1336	246.007	14.4765
7.03	245.482	49.7694	245.913	15.7218
7.07	245.343	52.2501	245.867	16.9671
7.1	245.203	54.7308	245.82	18.0567
7.13	245.048	56.9014	245.742	19.302
7.17	244.878	59.2271	245.711	20.5473
7.2	244.676	61.3977	245.68	21.6369
7.23	244.506	63.5684	245.633	22.5709
7.27	244.366	65.739	245.555	23.6605
7.3	244.211	67.7546	245.493	24.7501
7.33	244.087	69.6151	245.446	25.6841
7.37	243.901	71.3206	245.384	26.4624
7.4	243.699	72.8711	245.338	27.3964
7.43	243.529	74.2665	245.291	28.019
7.47	243.374	75.5068	245.228	28.7973
7.5	243.234	76.282	245.166	29.42
7.53	243.095	76.9022	245.12	30.0426
7.57	242.94	77.2123	245.104	30.3539
7.6	242.738	77.3674	245.057	30.6652
7.63	242.552	77.3674	245.011	30.8209
7.67	242.397	77.3674	244.964	30.8209
7.7	242.226	77.5224	244.917	30.8209
7.73	242.087	77.6774	244.87	30.5096
7.77	241.994	77.8325	244.824	30.1983
7.8	241.87	77.8325	244.777	29.7313
7.83	241.792	77.8325	244.73	29.1086
7.87	241.606	77.8325	244.684	28.486
7.9	241.42	77.8325	244.637	27.8633
7.93	241.234	77.8325	244.606	27.2407
7.97	241.064	77.8325	244.559	26.6181
8	240.893	77.8325	244.528	26.1511
8.03	240.738	77.8325	244.512	25.6841
8.07	240.614	77.8325	244.45	25.3728
8.1	240.521	77.8325	244.388	25.0614
8.13	240.381	77.6774	244.326	24.9058
8.17	240.242	77.5224	244.279	24.7501
8.2	240.087	77.5224	244.232	24.5945
8.23	239.947	77.5224	244.232	24.1275
8.27	239.87	77.2123	244.201	23.8162
8.3	239.777	76.9022	244.17	23.5048
8.33	239.606	76.5921	244.108	23.1935
8.37	239.451	76.127	244.046	23.0378
8.4	239.343	75.6619	243.983	22.8822
8.43	239.265	74.8866	243.936	22.8822
8.47	239.157	74.2665	243.89	22.7265
8.5	239.033	73.4912	243.859	22.5709
8.53	238.877	72.8711	243.828	22.4152
8.57	238.722	72.4059	243.812	22.2595
8.6	238.614	71.7857	243.781	22.1039
8.63	238.505	71.0105	243.734	21.9482
8.67	238.35	70.3903	243.703	21.6369
8.7	238.164	69.9252	243.656	21.6369
8.73	237.978	69.6151	243.61	21.4812
8.77	237.823	69.305	243.578	21.3256
8.8	237.653	69.15	243.547	21.1699
8.83	237.467	68.9949	243.501	21.1699
8.87	237.312	68.9949	243.454	21.0143
8.9	237.156	68.9949	243.423	21.0143
8.93	237.017	68.9949	243.392	20.8586
8.97	236.877	69.15	243.329	20.7029
9	236.738	69.305	243.283	20.7029
9.03	236.645	69.305	243.236	20.5473
9.07	236.536	69.4601	243.205	20.5473
9.1	236.412	69.4601	243.158	20.5473
9.13	236.242	69.305	243.112	20.5473
9.17	236.087	69.305	243.065	20.5473
9.2	235.932	69.15	243.003	20.5473
9.23	235.761	69.305	242.956	20.5473
9.27	235.653	69.4601	242.878	20.7029
9.3	235.544	69.6151	242.863	20.7029
9.33	235.405	69.9252	242.831	20.8586
9.37	235.234	70.2353	242.785	20.7029
9.4	235.032	70.5454	242.738	20.7029
9.43	234.862	71.0105	242.691	20.8586
9.47	234.753	71.1656	242.629	21.0143
9.5	234.645	71.4757	242.598	21.1699
9.53	234.49	71.7857	242.582	21.1699
9.57	234.335	72.0958	242.567	21.1699
9.6	234.195	72.2509	242.505	21.1699
9.63	234.04	72.4059	242.458	21.1699
9.67	233.87	72.716	242.427	21.0143
9.7	233.73	72.8711	242.395	21.0143
9.73	233.529	73.1811	242.364	21.1699
9.77	233.373	73.4912	242.318	21.1699
9.8	233.203	73.4912	242.286	21.1699
9.83	233.094	73.6463	242.24	21.1699
9.87	232.877	73.8013	242.178	21.3256
9.9	232.335	74.5766	242.131	21.3256
9.93	231.684	76.282	242.084	21.3256
9.97	231.141	78.6077	242.053	21.3256
10						0
10	230.722	81.2435	242.022	21.1699		500
10.03	230.366	84.1893	241.835	21.4812
10.07	230.055	87.2902	241.368	22.4152
10.1	229.73	90.5462	240.808	24.2831
10.13	229.42	93.8021	240.372	26.7737
10.17	229.125	97.3681	240.045	29.5756
10.2	228.877	100.934	239.765	32.8445
10.23	228.66	104.19	239.562	35.9577
10.27	228.412	107.601	239.36	39.2266
10.3	228.179	110.857	239.189	42.6511
10.33	227.916	113.958	239.064	45.92
10.37	227.652	116.904	238.955	49.0333
10.4	227.404	119.695	238.831	52.1465
10.43	227.187	122.175	238.706	55.104
10.47	226.939	124.656	238.597	57.9059
10.5	226.675	127.137	238.457	60.7078
10.53	226.381	129.462	238.348	63.3541
10.57	226.102	131.788	238.224	65.8447
10.6	225.792	133.959	238.099	68.3352
10.63	225.513	135.819	237.959	70.5145
10.67	225.234	137.68	237.85	72.6937
10.7	224.986	139.23	237.726	74.5617
10.73	224.722	140.781	237.601	76.4296
10.77	224.458	142.176	237.492	77.9862
10.8	224.21	143.261	237.368	79.3872
10.83	223.962	143.882	237.243	80.6325
10.87	223.699	144.502	237.119	81.7221
10.9	223.451	144.657	236.994	82.5004
10.93	223.218	144.657	236.854	83.123
10.97	223.017	144.192	236.683	83.59
11	222.753	143.571	236.574	83.7457
11.03	222.489	142.641	236.434	83.7457
11.07	222.179	141.556	236.309	83.4344
11.1	221.931	140.161	236.2	82.8117
11.13	221.668	138.455	236.06	81.8778
11.17	221.404	136.439	235.936	80.7881
11.2	221.125	134.269	235.842	79.3872
11.23	220.846	132.563	235.702	77.6749
11.27	220.598	131.478	235.577	75.807
11.3	220.334	130.858	235.453	73.4721
11.33	220.117	130.393	235.344	70.8258
11.37	219.869	130.083	235.266	68.1796
11.4	219.59	129.928	235.111	65.8447
11.43	219.373	129.773	235.002	64.4437
11.47	219.14	129.618	234.893	63.3541
11.5	218.83	129.773	234.752	62.7314
11.53	218.443	130.083	234.628	62.4201
11.57	218.132	130.393	234.504	62.1088
11.6	217.885	130.703	234.394	62.1088
11.63	217.652	130.703	234.286	61.9531
11.67	217.388	130.858	234.177	61.9531
11.7	217.125	131.013	234.083	61.7975
11.73	216.846	131.168	233.959	61.6418
11.77	216.582	131.323	233.819	61.4861
11.8	216.319	131.323	233.632	61.4861
11.83	216.039	131.323	233.507	61.4861
11.87	215.745	131.478	233.398	61.4861
11.9	215.481	131.633	233.289	61.3305
11.93	215.218	131.943	233.18	61.3305
11.97	214.97	132.098	233.071	61.1748
12	214.675	132.408	232.947	61.1748
12.03	214.427	132.718	232.822	61.0192
12.07	214.163	133.028	232.698	61.0192
12.1	213.931	133.184	232.573	60.8635
12.13	213.698	133.339	232.464	60.7078
12.17	213.404	133.494	232.355	60.5522
12.2	213.109	133.804	232.231	60.3965
12.23	212.83	133.959	232.122	60.2409
12.27	212.613	133.959	232.013	60.0852
12.3	212.349	133.959	231.888	60.0852
12.33	212.086	133.804	231.795	59.9295
12.37	211.807	133.804	231.686	59.7739
12.4	211.512	133.804	231.561	59.7739
12.43	211.218	133.959	231.421	59.7739
12.47	210.954	133.959	231.281	59.7739
12.5	210.706	134.114	231.172	59.7739
12.53	210.458	134.114	231.063	59.6182
12.57	210.21	134.114	230.954	59.6182
12.6	209.962	133.959	230.83	59.6182
12.63	209.729	133.804	230.721	59.6182
12.67	209.496	133.649	230.612	59.6182
12.7	209.249	133.184	230.472	59.4625
12.73	208.969	133.028	230.363	59.4625
12.77	208.706	132.563	230.238	59.3069
12.8	208.427	132.098	230.114	59.3069
12.83	208.148	131.788	230.005	59.3069
12.87	207.822	131.788	229.896	59.1512
12.9	207.589	131.788	229.787	59.1512
12.93	207.341	131.788	229.678	58.9956
12.97	207.093	131.633	229.538	58.9956
13	206.83	131.633	229.445	58.8399
13.03	206.52	131.478	229.351	58.6842
13.07	206.241	131.478	229.227	58.5286
13.1	206.008	131.478	229.102	58.3729
13.13	205.775	131.478	228.977	58.3729
13.17	205.512	131.323	228.884	58.2173
13.2	205.279	131.323	228.76	58.2173
13.23	205.016	131.168	228.666	58.2173
13.27	204.752	131.168	228.573	58.0616
13.3	204.52	131.013	228.464	57.9059
13.33	204.349	130.703	228.324	57.7503
13.37	204.163	130.393	228.184	57.7503
13.4							0
13.4	203.884	130.083	228.075	57.7503			500
13.43	203.45	129.928	227.95	57.7503
13.47	203.078	130.083	227.919	57.5946
13.5	202.675	130.548	227.95	57.1276
13.53	202.256	131.168	227.997	56.505
13.57	201.822	132.253	227.981	55.571
13.6	201.372	133.494	227.95	54.6371
13.63	200.923	135.044	227.857	53.7031
13.67	200.488	136.75	227.748	52.7691
13.7	200.039	138.765	227.654	51.8352
13.73	199.589	141.091	227.53	50.9012
13.77	199.186	143.571	227.359	50.2785
13.8	198.736	146.207	227.234	49.8116
13.83	198.287	149.153	227.125	49.3446
13.87	197.822	152.099	227.016	48.8776
13.9	197.341	155.355	226.876	48.4106
13.93	196.891	158.611	226.736	48.0993
13.97	196.442	161.867	226.596	47.9436
14	195.946	165.278	226.471	47.788
14.03	195.512	168.689	226.347	47.788
14.07	195.046	172.255	226.238	47.788
14.1	194.566	175.821	226.098	47.788
14.13	194.101	179.542	225.958	48.0993
14.17	193.667	183.108	225.802	48.4106
14.2	193.248	186.829	225.678	48.7219
14.23	192.783	190.395	225.553	49.0333
14.27	192.287	193.961	225.428	49.5002
14.3	191.806	197.527	225.288	50.1229
14.33	191.341	201.093	225.133	50.7455
14.37	190.86	204.504	224.993	51.3682
14.4	190.395	207.915	224.868	52.1465
14.43	189.93	211.171	224.775	52.7691
14.47	189.434	214.272	224.697	53.5474
14.5	188.969	217.218	224.588	54.1701
14.53	188.488	219.853	224.463	54.9484
14.57	188.069	222.179	224.276	55.7267
14.6	187.62	224.35	224.121	56.6606
14.63	187.155	226.21	223.996	57.5946
14.67	186.674	227.451	223.872	58.5286
14.7	186.193	228.536	223.763	59.6182
14.73	185.713	229.156	223.638	60.7078
14.77	185.263	229.776	223.514	61.7975
14.8	184.798	230.242	223.389	62.8871
14.83	184.333	230.707	223.265	63.6654
14.87	183.883	231.017	223.14	63.9767
14.9	183.403	231.327	223	64.288
14.93	182.953	231.637	222.86	64.4437
14.97	182.534	231.792	222.736	64.4437
15	182.116	231.792	222.611	64.4437
15.03	181.697	231.792	222.486	64.4437
15.07	181.216	231.792	222.346	64.4437
15.1	180.72	231.792	222.222	64.4437
15.13	180.255	231.637	222.097	64.4437
15.17	179.837	231.482	221.973	64.288
15.2	179.418	231.172	221.848	64.288
15.23	178.968	231.017	221.739	64.1324
15.27	178.519	230.707	221.615	63.9767
15.3	178.038	230.397	221.49	63.9767
15.33	177.557	230.242	221.366	63.8211
15.37	177.046	230.242	221.195	63.8211
15.4	176.581	230.087	221.07	63.8211
15.43	176.1	230.087	220.945	63.8211
15.47	175.65	230.087	220.821	63.6654
15.5	175.201	229.931	220.696	63.8211
15.53	174.72	229.776	220.572	63.8211
15.57	174.239	229.776	220.432	63.8211
15.6	173.774	229.621	220.307	63.8211
15.63	173.325	229.621	220.183	63.8211
15.67	172.906	229.621	220.074	63.8211
15.7	172.456	229.466	219.965	63.8211
15.73	172.022	229.311	219.84	63.9767
15.77	171.557	229.156	219.7	63.9767
15.8	171.092	229.156	219.544	63.8211
15.83	170.627	229.156	219.42	63.8211
15.87	170.177	229.156	219.295	63.6654
15.9	169.696	229.156	219.155	63.6654
15.93	169.216	229.156	219.046	63.6654
15.97	168.751	229.311	218.922	63.8211
16	168.286	229.311	218.844	63.6654
16.03	167.805	229.466	218.719	63.6654
16.07	167.34	229.621	218.595	63.5097
16.1	166.875	229.931	218.486	63.3541
16.13	166.394	230.087	218.361	63.1984
16.17	165.882	230.552	218.221	63.0428
16.2	165.417	230.862	218.066	63.0428
16.23	164.968	231.172	217.926	63.0428
16.27	164.502	231.482	217.801	63.0428
16.3	164.084	231.637	217.677	63.0428
16.33	163.712	231.637	217.536	63.0428
16.37	163.433	231.172	217.396	63.0428
16.4								0
16.4	163.123	230.397	217.303	63.0428				500
16.43	162.735	229.776	217.147	63.0428
16.47	162.239	229.156	217.069	63.0428
16.5	161.774	228.381	217.038	62.8871
16.53	161.309	227.761	216.992	62.4201
16.57	160.844	227.141	216.914	61.9531
16.6	160.332	226.52	216.774	61.6418
16.63	159.851	226.055	216.602	61.3305
16.67	159.355	225.59	216.431	61.0192
16.7	158.828	225.59	216.229	61.0192
16.73	158.301	225.59	216.058	61.1748
16.77	157.82	225.745	215.871	61.3305
16.8	157.324	225.9	215.684	61.6418
16.83	156.812	226.21	215.482	62.1088
16.87	156.285	226.52	215.279	62.7314
16.9	155.758	227.141	215.03	63.5097
16.93	155.262	227.916	214.812	64.4437
16.97	154.735	228.536	214.594	65.5333
17	154.254	229.311	214.392	66.623
17.03	153.789	229.931	214.205	67.7126
17.07	153.324	230.552	213.972	68.9579
17.1	152.859	231.172	213.754	70.3588
17.13	152.393	231.637	213.536	71.7598
17.17	151.882	232.257	213.318	73.3164
17.2	151.324	233.187	213.1	75.0287
17.23	150.797	233.963	212.882	76.7409
17.27	150.3	234.893	212.664	78.4532
17.3	149.758	235.978	212.431	80.3211
17.33	149.246	237.219	212.228	82.0334
17.37	148.766	238.304	211.995	83.9013
17.4	148.269	239.389	211.73	85.7693
17.43	147.804	240.475	211.497	87.6372
17.47	147.324	241.715	211.279	89.3495
17.5	146.889	242.8	211.077	91.2174
17.53	146.44	243.886	210.874	93.0854
17.57	145.975	244.816	210.672	94.7976
17.6	145.478	245.746	210.469	96.5099
17.63	144.998	246.676	210.236	98.2222
17.67	144.486	247.452	210.002	99.9344
17.7	143.975	247.917	209.8	101.491
17.73	143.463	248.072	209.582	103.048
17.77	142.982	247.917	209.364	104.449
17.8	142.502	247.917	209.146	105.85
17.83	141.99	247.762	208.897	106.784
17.87	141.494	247.607	208.648	107.718
17.9	140.998	247.297	208.446	108.184
17.93	140.502	247.141	208.244	108.651
17.97	140.006	246.831	208.025	108.963
18	139.494	246.676	207.808	109.274
18.03	139.013	246.521	207.59	109.585
18.07	138.501	246.366	207.372	109.741
18.1	138.021	246.366	207.154	109.741
18.13	137.54	246.056	206.952	109.741
18.17	137.06	246.056	206.733	109.741
18.2	136.564	245.901	206.547	109.741
18.23	136.021	245.901	206.344	109.585
18.27	135.509	246.056	206.126	109.585
18.3	135.013	246.211	205.877	109.585
18.33	134.517	246.366	205.613	109.585
18.37	133.99	246.521	205.395	109.585
18.4	133.478	246.676	205.192	109.585
18.43	132.966	246.831	204.99	109.43
18.47	132.439	246.986	204.757	109.43
18.5	131.974	246.986	204.539	109.43
18.53	131.494	247.141	204.336	109.274
18.57	131.028	247.297	204.118	109.274
18.6	130.532	247.452	203.916	109.118
18.63	130.021	247.762	203.714	108.963
18.67	129.54	248.072	203.511	108.807
18.7	129.044	248.382	203.309	108.651
18.73	128.532	248.692	203.091	108.496
18.77	128.036	249.002	202.873	108.496
18.8	127.524	249.157	202.624	108.496
18.83	127.028	249.312	202.437	108.496
18.87	126.548	249.467	202.235	108.34
18.9	126.051	249.467	202.001	108.34
18.93	125.571	249.312	201.799	108.029
18.97	125.059	249.312	201.581	108.029
19	124.547	249.312	201.394	107.873
19.03	124.067	249.312	201.192	107.718
19.07	123.586	249.157	200.974	107.406
19.1	123.09	249.157	200.772	107.251
19.13	122.594	249.002	200.569	107.095
19.17	122.098	249.002	200.383	106.784
19.2	121.602	249.002	200.196	106.628
19.23	121.059	249.002	199.993	106.472
19.27	120.578	248.847	199.775	106.161
19.3	120.082	248.847	199.526	106.161
19.33	119.571	248.847	199.293	106.005
19.37	119.09	248.847	199.075	105.85
19.4	118.594	248.847	198.857	105.85
19.43	118.113	248.692	198.67	105.85
19.47	117.586	248.692	198.468	105.694
19.5	117.074	248.537	198.266	105.538
19.53	116.563	248.537	198.063	105.383
19.57	116.082	248.537	197.876	105.071
19.6	115.586	248.537	197.721	104.76
19.63	115.105	248.382	197.534	104.449
19.67	114.609	248.382	197.347	104.137
19.7	114.097	248.382	197.145	103.826
19.73	113.601	248.537	196.958	103.67
19.77	113.121	248.537	196.756	103.359
19.8	112.624	248.692	196.522	103.048
19.83	112.128	248.847	196.273	103.048
19.87	111.663	248.692	196.086	102.892
19.9	111.183	248.692	195.899	102.736
19.93	110.686	248.537	195.713	102.581
19.97	110.175	248.537	195.495	102.425
20	109.663	248.382	195.292	102.269
20.03	109.167	248.382	195.106	101.958
20.07	108.671	248.382	194.919	101.802
20.1	108.19	248.382	194.716	101.491
20.13	107.679	248.382	194.514	101.491
20.17	107.198	248.382	194.312	101.335
20.2	106.702	248.227	194.125	101.024
20.23	106.19	248.227	193.907	101.024
20.27	105.725	248.072	193.72	100.868
20.3	105.244	248.072	193.549	100.713
20.33	104.779	247.917	193.315	100.557
20.37	104.299	247.762	193.113	100.401
20.4	103.849	247.452	192.926	100.401
20.43	103.399	246.986	192.755	100.246
20.47	102.965	246.521	192.6	99.9344
20.5	102.485	246.056	192.413	99.6231
20.53	102.035	245.591	192.226	99.3118
20.57	101.601	244.971	192.039	99.0005
20.6	101.151	244.351	191.837	98.6892
20.63	100.717	243.73	191.65	98.3778
20.67	100.283	242.955	191.448	98.2222
20.7	99.8489	242.18	191.261	98.0665
20.73	99.3837	241.405	191.09	97.9108
20.77	98.9031	240.475	190.903	97.7552
20.8	98.4845	239.699	190.747	97.5995
20.83	98.0658	238.769	190.56	97.4439
20.87	97.6162	237.994	190.374	97.1325
20.9	97.1976	237.064	190.156	96.9769
20.93	96.7635	235.978	189.969	96.8212
20.97	96.3138	235.048	189.767	96.5099
21	95.8642	234.118	189.595	96.1986
21.03	95.3991	233.187	189.409	95.8873
21.07	94.9494	232.257	189.253	95.5759
21.1	94.5153	231.327	189.066	95.1089
21.13	94.0812	230.552	188.879	94.7976
21.17	93.6626	229.621	188.692	94.642
21.2	93.2439	228.536	188.537	94.3306
21.23	92.8098	227.606	188.35	94.175
21.27	92.3757	226.52	188.163	93.8637
21.3	91.9416	225.745	187.976	93.5523
21.33	91.4919	224.815	187.79	93.3967
21.37	91.0578	224.04	187.618	93.241
21.4	90.6082	223.42	187.463	92.9297
21.43	90.1586	222.644	187.292	92.6184
21.47	89.7244	222.179	187.073	92.4627
21.5	89.3058	221.559	186.871	92.307
21.53	88.8717	221.094	186.7	92.1514
21.57	88.4221	220.784	186.544	91.9957
21.6	87.9879	220.474	186.373	91.8401
21.63	87.5228	220.164	186.202	91.5287
21.67	87.0732	220.009	186.015	91.3731
21.7	86.639	220.009	185.828	91.3731
21.73	86.1894	219.853	185.657	91.2174
21.77	85.7553	219.853	185.486	91.2174
21.8	85.3212	219.698	185.33	90.9061
21.83	84.9025	219.543	185.143	90.7504
21.87	84.4684	219.543	184.988	90.4391
21.9	84.0033	219.543	184.832	90.2835
21.93	83.5381	219.543	184.661	89.9721
21.97	83.104	219.543	184.474	89.8165
22	82.6699	219.543	184.303	89.5051
22.03	82.2358	219.543	184.116	89.3495
22.07	81.8016	219.543	183.929	89.1938
22.1	81.3675	219.698	183.789	89.0382
22.13	80.9179	219.698	183.618	88.7268
22.17	80.4683	219.698	183.447	88.4155
22.2	79.9876	219.853	183.275	88.2599
22.23	79.5535	220.009	183.135	87.9485
22.27	79.1194	220.009	182.98	87.6372
22.3	78.6852	220.164	182.808	87.4816
22.33	78.2511	220.164	182.622	87.3259
22.37	77.8325	220.164	182.45	87.0146
22.4	77.3984	220.319	182.295	86.8589
22.43	76.9642	220.319	182.124	86.5476
22.47	76.4991	220.474	181.968	86.3919
22.5	76.0495	220.629	181.812	86.0806
22.53	75.6154	220.629	181.656	85.7693
22.57	75.1657	220.629	181.485	85.458
22.6	74.7471	220.629	181.314	85.3023
22.63	74.313	220.629	181.143	84.991
22.67	73.8633	220.629	180.94	84.991
22.7	73.4447	220.474	180.785	84.6797
22.73	73.0106	220.474	180.645	84.524
22.77	72.53	220.474	180.489	84.2127
22.8	72.0803	220.474	180.349	84.057
22.83	71.6462	220.474	180.162	83.9013
22.87	71.1966	220.474	179.991	83.7457
22.9	70.7625	220.474	179.835	83.59
22.93	70.3283	220.474	179.664	83.4344
22.97	69.8787	220.474	179.493	83.2787
23	69.4446	220.474	179.322	83.123
23.03	68.9484	220.629	179.135	83.123
23.07	68.4988	220.629	178.979	83.123
23.1	68.0337	220.784	178.823	83.123
23.13	67.584	220.939	178.652	82.9674
23.17	67.1344	221.094	178.481	82.9674
23.2	66.7158	221.249	178.341	82.9674
23.23	66.2662	221.249	178.201	82.8117
23.27	65.8165	221.404	178.045	82.6561
23.3	65.3514	221.559	177.858	82.5004
23.33	64.8707	221.869	177.718	82.3447
23.37	64.4366	222.024	177.578	82.1891
23.4	63.987	222.179	177.423	82.1891
23.43	63.5374	222.334	177.236	82.0334
23.47	63.0877	222.644	177.049	82.0334
23.5	62.6381	222.799	176.878	82.0334
23.53	62.204	222.954	176.738	82.0334
23.57	61.7233	223.264	176.597	81.8778
23.6	61.2427	223.575	176.442	81.7221
23.63	60.7931	223.885	176.255	81.5664
23.67	60.3279	224.195	176.099	81.5664
23.7	59.8783	224.505	175.959	81.4108
23.73	59.4442	224.66	175.819	81.2551
23.77	58.9945	224.815	175.664	81.2551
23.8	58.5294	225.125	175.508	81.0994
23.83	58.0798	225.435	175.337	80.9438
23.87	57.5991	225.59	175.197	80.6325
23.9	57.1495	225.9	175.072	80.4768
23.93	56.7154	226.055	174.932	80.1655
23.97	56.2658	226.21	174.73	80.0098
24	55.8006	226.365	174.558	79.8542
24.03	55.351	226.52	174.418	79.8542
24.07	54.9014	226.52	174.263	79.6985
24.1	54.4517	226.675	174.107	79.3872
24.13	53.9556	226.831	173.951	79.2315
24.17	53.506	226.986	173.796	79.0759
24.2	53.0563	226.986	173.655	78.9202
24.23	52.5912	227.141	173.516	78.6089
24.27	52.1416	227.296	173.36	78.4532
24.3	51.6764	227.296	173.204	78.2975
24.33	51.2423	227.296	173.048	78.1419
24.37	50.7772	227.451	172.893	77.9862
24.4	50.2655	227.606	172.753	77.9862
24.43	49.8159	227.761	172.613	77.6749
24.47	49.3818	227.916	172.457	77.6749
24.5	48.9321	228.071	172.301	77.5192
24.53	48.4825	228.071	172.146	77.3636
24.57	48.0174	228.071	171.99	77.2079
24.6	47.5988	228.071	171.834	77.0523
24.63	47.2887	227.761	171.632	77.0523
24.67	47.0096	227.296	171.507	77.0523
24.7	46.591	226.675	171.492	76.7409
24.73	46.1103	226.055	171.492	75.9626
24.77	45.5832	225.59	171.492	75.1843
24.8	45.025	225.435	171.461	74.2504
24.83	44.4358	225.59	171.399	73.1607
24.87	43.8467	225.745	171.258	72.2268
24.9	43.2885	226.21	171.103	71.1371
24.93	42.6683	227.141	170.947	70.2032
24.97	42.0947	228.071	170.776	69.4249
25	41.5055	229.311	170.573	68.9579
25.03	40.9163	230.552	170.387	68.3352
25.07	40.3272	232.102	170.2	67.8682
25.1	39.738	233.808	170.029	67.5569
25.13	39.1333	235.668	169.842	67.4013
25.17	38.5286	237.684	169.639	67.2456
25.2	37.9395	239.854	169.453	67.4013
25.23	37.3503	242.025	169.25	67.4013
25.27	36.7766	244.351	169.064	67.5569
25.3	36.203	246.676	168.892	67.8682
25.33	35.5983	249.157	168.69	68.3352
25.37	34.9781	251.793	168.472	68.9579
25.4	34.4044	254.274	168.285	69.5805
25.43	33.8308	256.909	168.114	70.2032
25.47	33.2571	259.545	167.927	70.9815
25.5	32.6679	262.181	167.74	71.9154
25.53	32.0943	264.661	167.569	72.8494
25.57	31.4896	267.297	167.382	73.6277
25.6	30.9004	269.933	167.196	74.7173
25.63	30.3423	272.414	167.009	75.6513
25.67	29.7531	274.894	166.822	76.8966
25.7	29.1794	277.22	166.635	77.9862
25.73	28.6213	279.546	166.448	79.2315
25.77	28.0321	281.716	166.262	80.3211
25.8	27.4584	283.887	166.075	81.5664
25.83	26.8848	285.748	165.919	82.8117
25.87	26.3266	287.608	165.748	84.057
25.9	25.7684	289.159	165.53	85.458
25.93	25.2103	290.399	165.328	86.8589
25.97	24.6521	291.329	165.141	88.4155
26	24.0474	291.639	164.97	89.9721
26.03	23.4893	291.639	164.783	91.0618
26.07	22.9466	291.484	164.612	91.9957
26.1	22.404	291.174	164.425	92.6184
26.13	21.8458	290.709	164.254	92.9297
26.17	21.3032	290.089	164.067	93.0854
26.2	20.745	289.624	163.911	93.0854
26.23	20.1558	289.159	163.74	92.9297
26.27	19.6132	288.538	163.553	92.774
26.3	19.0705	287.918	163.382	92.6184
26.33	18.5124	287.298	163.211	92.4627
26.37	17.9852	286.678	163.024	92.307
26.4	17.4425	286.058	162.853	91.9957
26.43	16.8844	285.438	162.681	91.8401
26.47	16.3417	284.662	162.479	91.5287
26.5	15.7991	284.042	162.292	91.3731
26.53	15.3029	283.267	162.106	91.2174
26.57	14.7913	282.492	161.919	91.2174
26.6	14.2486	281.716	161.763	91.0618
26.63	13.737	280.786	161.592	90.7504
26.67	13.2098	280.011	161.421	90.5948
26.7	12.6517	279.236	161.249	90.4391
26.73	12.1555	278.305	161.063	90.4391
26.77	11.6594	277.375	160.86	90.2835
26.8	11.1477	276.445	160.673	90.2835
26.83	10.6671	275.515	160.502	90.1278
26.87	10.2019	274.429	160.331	90.1278
26.9	9.7213	273.189	160.175	89.9721
26.93	9.2097	272.104	160.02	89.6608

## Sheet: 5 mg.ml primary data n=1
Time [min]	1A: O2 Concentration [nmol/ml]	1A: O2 Slope uncorr. [pmol/(s*ml)]	1B: O2 Concentration [nmol/ml]	1B: O2 Slope uncorr. [pmol/(s*ml)]	mitos	NADH	ADP	cyt c
0	162.887		161.254
0.03	177.977		163.731
0.07	198.811		177.826
0.1	216.979		196.996
0.13	230.169	-8678.24	214.119	-6949.76
0.17	238.809	-7651.1	226.655	-8107.04
0.2	244.063	-5616.73	234.91	-7191.31
0.23	247.157	-3712.57	240.047	-5344.56
0.27	248.95	-2295.56	243.196	-3577.31
0.3	250.037	-4887.24	245.107	-5297.93
0.33	250.635	-3722.99	246.238	-4638.12
0.37	251.033	-2540.82	246.911	-3564.16
0.4	251.248	-1616.16	247.323	-2467.12
0.43	251.34	-981.798	247.568	-1594.65
0.47	251.401	-2762.33	247.751	-3209.33
0.5	251.447	-2033.3	247.843	-2647.36
0.53	251.493	-1362.17	247.904	-1966.91
0.57	251.523	-857.867	247.95	-1338.13
0.6	251.493	-518.703	247.965	-858.095
0.63	251.462	-1728.45	247.996	-2064.6
0.67	251.462	-1254.94	248.011	-1666.05
0.7	251.462	-834.122	248.027	-1222.09
0.73	251.447	-522.226	248.042	-825.991
0.77	251.462	-314.347	248.073	-528.647
0.8	251.462	-1172.83	248.057	-1423.13
0.83	251.462	-845.611	248.073	-1136.02
0.87	251.416	-559.298	248.088	-827.979
0.9	251.386	-348.968	248.088	-557.999
0.93	251.355	-208.952	248.088	-356.966
0.97	251.309	-844.386	248.057	-1035.89
1	251.294	-605.256	248.057	-821.405
1.03	251.263	-398.448	248.057	-596.371
1.07	251.232	-247.096	248.042	-400.995
1.1	251.202	-146.603	248.027	-256.068
1.13	251.156	-634.362	248.027	-785.632
1.17	251.141	-452.525	248.042	-620.22
1.2	251.095	-296.424	248.042	-448.998
1.23	251.049	-182.297	248.011	-301.319
1.27	251.049	-106.774	247.996	-192.166
1.3	251.033	-492.507	247.996	-615.48
1.33	251.033	-349.887	247.981	-484.16
1.37	251.018	-227.947	247.965	-349.628
1.4	250.972	-139.25	247.981	-234.207
1.43	250.941	-80.425	247.981	-149.055
1.47	250.911	-43.8125	247.981	-92.1845
1.5	250.88	-21.753	247.981	-56.1056
1.53	250.865	-8.5787	247.965	-33.9386
1.57	250.865	-0.766	247.965	-20.3326
1.6	250.849	3.8298	247.965	-12.0772
1.63	250.849	6.7404	247.965	-7.1852
1.67	250.849	8.4255	247.965	-4.1277
1.7	250.834	9.4978	247.95	-2.1403
1.73	250.819	9.9574	247.935	-0.7644
1.77	250.773	10.5701	247.92	0.1529
1.8	250.712	10.8765	247.92	0.7644
1.83	250.681	11.1829	247.92	1.223
1.87	250.681	11.3361	247.92	1.5288
1.9	250.696	11.3361	247.904	1.8345
1.93	250.666	11.4893	247.889	2.1403
1.97	250.62	11.4893	247.874	2.2931
2	250.604	11.4893	247.858	2.5989
2.03	250.574	11.6425	247.874	2.7518
2.07	250.543	11.6425	247.889	2.7518
2.1	250.497	11.6425	247.874	2.7518
2.13	250.466	11.4893	247.858	2.9047
2.17	250.466	11.4893	247.828	2.9047
2.2	250.436	11.3361	247.828	2.9047
2.23	250.39	11.3361	247.843	2.9047
2.27	250.375	11.3361	247.843	2.9047
2.3	250.359	11.1829	247.858	2.9047
2.33	250.313	11.3361	247.858	2.7518
2.37	250.313	11.1829	247.828	2.7518
2.4	250.283	11.1829	247.782	2.9047
2.43	250.252	11.3361	247.767	2.9047
2.47	250.283	11.1829	247.751	3.0575
2.5	250.298	11.1829	247.721	3.2104
2.53	250.313	11.0297	247.706	3.2104
2.57	250.298	10.8765	247.69	3.3633
2.6	250.267	10.8765	247.721	3.5162
2.63	250.237	10.7233	247.751	3.5162
2.67	250.191	10.7233	247.751	3.5162
2.7	250.16	10.5701	247.751	3.669
2.73	250.145	10.5701	247.736	3.669
2.77	250.145	10.5701	247.706	3.669
2.8	250.114	10.5701	247.69	3.669
2.83	250.099	10.5701	247.69	3.8219
2.87	250.083	10.417	247.66	3.8219
2.9	250.068	10.417	247.66	3.8219
2.93	250.022	10.417	247.644	3.9748
2.97	250.007	10.2638	247.629	3.9748
3	250.007	10.1106	247.599	4.1277
3.03	250.022	9.9574	247.583	4.1277
3.07	250.022	9.651	247.553	4.2805
3.1	249.961	9.4978	247.553	4.4334
3.13	249.93	9.4978	247.568	4.5863
3.17	249.961	9.3446	247.553	4.5863
3.2	249.961	9.1914	247.553	4.5863
3.23	249.93	8.885	247.553	4.5863
3.27	249.884	8.7319	247.553	4.7392
3.3	249.884	8.5787	247.553	4.7392
3.33	249.869	8.4255	247.553	4.7392
3.37	249.823	8.4255	247.537	4.7392
3.4	249.838	8.2723	247.522	4.7392
3.43	249.808	8.2723	247.507	4.7392
3.47	249.808	8.1191	247.522	4.5863
3.5	249.777	8.1191	247.522	4.5863
3.53	249.762	8.1191	247.507	4.5863
3.57	249.762	8.1191	247.492	4.5863
3.6	249.746	8.1191	247.476	4.4334
3.63	249.731	7.9659	247.461	4.4334
3.67	249.716	8.1191	247.446	4.2805
3.7	249.731	8.1191	247.43	4.2805
3.73	249.746	7.9659	247.415	4.2805
3.77	249.716	7.9659	247.415	4.2805
3.8	249.701	7.9659	247.415	4.2805
3.83	249.685	7.8127	247.4	4.4334
3.87	249.655	7.6595	247.385	4.4334
3.9	249.67	7.3531	247.369	4.5863
3.93	249.639	7.2	247.354	4.7392
3.97	249.655	7.0468	247.354	4.5863
4	249.655	6.8936	247.354	4.5863
4.03	249.639	6.7404	247.354	4.4334
4.07	249.609	6.5872	247.354	4.4334
4.1	249.593	6.5872	247.339	4.2805
4.13	249.547	6.5872	247.323	4.2805
4.17	249.501	6.5872	247.308	4.2805
4.2	249.486	6.5872	247.323	4.1277
4.23	249.486	6.5872	247.323	4.1277
4.27	249.501	6.5872	247.308	4.1277
4.3	249.501	6.5872	247.308	3.9748
4.33	249.501	6.5872	247.308	3.9748
4.37	249.501	6.434	247.293	3.9748
4.4	249.486	6.2808	247.278	4.1277
4.43	249.44	6.2808	247.247	4.1277
4.47	249.394	6.434	247.232	4.2805
4.5	249.409	6.434	247.216	4.2805
4.53	249.409	6.2808	247.216	4.2805
4.57	249.394	6.2808	247.216	4.4334
4.6	249.409	6.2808	247.186	4.4334
4.63	249.363	6.1276	247.171	4.4334
4.67	249.348	6.2808	247.186	4.4334
4.7	249.348	6.2808	247.186	4.4334
4.73	249.348	6.2808	247.186	4.4334
4.77	249.348	6.2808	247.171	4.4334
4.8	249.302	6.2808	247.171	4.2805
4.83	249.302	6.2808	247.186	4.2805
4.87	249.333	6.2808	247.201	4.1277
4.9	249.333	6.1276	247.186	3.9748
4.93	249.302	6.1276	247.186	3.8219
4.97	249.287	6.1276	247.171	3.669
5	249.272	6.1276	247.171	3.669
5.03	249.21	6.1276	247.155	3.5162
5.07	249.149	6.2808	247.125	3.5162
5.1	249.134	6.2808	247.094	3.5162
5.13	249.134	6.434	247.064	3.669
5.17	249.149	6.434	247.048	3.669
5.2	249.164	6.434	247.033	3.8219
5.23	249.134	6.434	247.033	3.9748
5.27	249.118	6.434	247.033	3.9748
5.3	249.103	6.434	247.018	4.1277
5.33	249.088	6.434	247.002	4.1277
5.37	249.088	6.434	246.987	4.2805
5.4	249.072	6.2808	247.002	4.2805
5.43	249.011	6.434	246.987	4.2805
5.47	248.981	6.5872	246.972	4.4334
5.5	248.981	6.7404	246.957	4.4334
5.53	249.011	6.8936	246.957	4.5863
5.57	249.042	6.8936	246.987	4.4334
5.6	249.042	6.7404	246.987	4.4334
5.63	249.026	6.7404	246.957	4.4334
5.67	248.996	6.5872	246.941	4.2805
5.7	248.981	6.5872	246.926	4.2805
5.73	248.95	6.434	246.911	4.2805
5.77	248.919	6.5872	246.911	4.4334
5.8	248.95	6.5872	246.926	4.4334
5.83	248.981	6.434	246.926	4.4334
5.87	248.996	6.2808	246.941	4.2805
5.9	248.981	6.1276	246.941	4.2805
5.93	248.981	5.9744	246.926	4.2805
5.97	248.965	5.8212	246.911	4.2805
6	248.95	5.668	246.911	4.1277
6.03	248.95	5.5149	246.911	4.1277
6.07	248.935	5.3617	246.941	3.9748
6.1	248.904	5.2085	246.926	3.8219
6.13	248.889	5.0553	246.895	3.8219
6.17	248.827	5.0553	246.895	3.669
6.2	248.735	5.2085	246.895	3.5162
6.23	248.628	5.3617	246.865	3.3633
6.27	248.46	5.8212	246.85	3.2104
6.3	248.291	6.5872	246.834	3.0575
6.33	248.123	7.6595	246.865	2.9047
6.37	247.939	9.0382	247.339	1.8345
6.4	247.786	10.5701	247.339	0.9173
6.43	247.632	12.4084	246.972	0.6115
6.47	247.479	14.3999	246.773	0.7644
6.5					0
6.5	247.311	16.3914	246.712	1.0701	500
6.53	247.157	18.536	246.62	1.5288
6.57	246.989	20.9871	246.529	2.1403
6.6	246.851	23.285	246.422	2.9047
6.63	246.683	25.8892	246.345	3.669
6.67	246.514	28.4934	246.315	4.5863
6.7	246.346	31.2509	246.253	5.5036
6.73	246.192	34.0083	246.192	6.4208
6.77	246.07	36.7657	246.116	7.4909
6.8	245.947	39.6763	246.055	8.5611
6.83	245.779	42.587	245.993	9.7841
6.87	245.641	45.3444	245.917	11.0071
6.9	245.472	47.9486	245.871	12.0772
6.93	245.319	50.706	245.841	13.1474
6.97	245.181	53.3103	245.81	14.2175
7	245.043	55.7613	245.779	15.2876
7.03	244.89	58.2124	245.734	16.5107
7.07	244.737	60.6634	245.703	17.4279
7.1	244.599	62.9613	245.642	18.498
7.13	244.461	65.106	245.611	19.5682
7.17	244.339	66.9442	245.581	20.3326
7.2	244.186	68.6293	245.55	21.2498
7.23	244.032	70.1612	245.504	21.8613
7.27	243.864	71.54	245.489	22.6257
7.3	243.711	72.7655	245.474	23.2372
7.33	243.603	73.6846	245.474	23.6958
7.37	243.466	74.4506	245.428	24.0016
7.4	243.297	74.9101	245.382	24.3074
7.43	243.129	75.3697	245.336	24.6131
7.47	242.991	75.3697	245.29	24.9189
7.5	242.853	75.3697	245.26	25.0717
7.53	242.7	75.2165	245.198	25.0717
7.57	242.577	74.757	245.183	25.2246
7.6	242.455	74.4506	245.153	25.0717
7.63	242.301	74.1442	245.122	25.0717
7.67	242.163	73.8378	245.076	24.766
7.7	242.041	73.6846	245.015	23.543
7.73	241.888	73.3782	244.969	22.32
7.77	241.719	73.225	244.923	21.5556
7.8	241.566	73.0719	244.893	20.9441
7.83	241.459	72.7655	244.877	20.3326
7.87	241.321	72.6123	244.877	19.8739
7.9	241.198	72.3059	244.847	19.4153
7.93	241.076	72.1527	244.786	19.1096
7.97	240.907	71.9995	244.74	18.8038
8	240.739	71.8463	244.74	18.498
8.03	240.616	71.6931	244.694	18.1923
8.07	240.478	71.6931	244.648	17.8865
8.1	240.295	71.6931	244.602	17.7337
8.13	240.157	71.54	244.556	17.7337
8.17	240.034	71.54	244.526	17.5808
8.2	239.942	71.2336	244.48	17.7337
8.23	239.82	71.0804	244.434	17.7337
8.27	239.682	70.9272	244.404	17.8865
8.3	239.559	70.774	244.373	17.8865
8.33	239.452	70.4676	244.342	17.8865
8.37	239.314	70.3144	244.327	17.8865
8.4	239.238	70.008	244.312	17.8865
8.43	238.962	69.8549	244.281	17.8865
8.47	238.334	70.6208	244.266	17.7337
8.5	237.66	72.3059	244.251	17.7337
8.53	237.215	74.6038	244.235	17.5808
8.57						0
8.57	236.894	76.9016	244.22	17.4279		500
8.6	236.603	79.5059	244.128	17.4279
8.63	236.342	82.2633	243.777	17.8865
8.67	236.097	84.8675	243.318	19.1096
8.7	235.867	87.4718	242.905	20.9441
8.73	235.638	90.2292	242.6	23.0843
8.77	235.408	92.8334	242.37	25.5304
8.8	235.178	95.5909	242.172	28.2821
8.83	234.933	98.1951	242.019	30.881
8.87	234.719	100.799	241.866	33.7857
8.9	234.473	103.25	241.744	36.3846
8.93	234.259	105.701	241.606	39.1364
8.97	234.075	107.846	241.484	41.8881
9	233.906	109.991	241.407	44.3342
9.03	233.723	111.829	241.3	46.9331
9.07	233.524	113.514	241.193	49.3791
9.1	233.324	115.199	241.101	51.6722
9.13	233.141	116.578	241.01	53.9654
9.17	233.003	117.803	240.918	55.9528
9.2	232.804	118.723	240.826	57.7873
9.23	232.559	119.489	240.75	59.4689
9.27	232.329	120.254	240.658	61.1506
9.3	232.099	120.867	240.582	62.5265
9.33	231.884	121.48	240.49	63.7495
9.37	231.685	121.633	240.383	64.8196
9.4	231.456	121.786	240.291	65.7369
9.43	231.256	121.786	240.184	66.5012
9.47	231.042	121.633	240.092	67.1127
9.5	230.812	121.327	240.001	67.5714
9.53	230.521	120.714	239.909	67.8771
9.57	230.276	119.948	239.802	68.03
9.6	230.061	119.029	239.695	68.03
9.63	229.862	117.65	239.603	67.7243
9.67	229.663	116.118	239.512	67.2656
9.7	229.464	114.127	239.435	66.5012
9.73	229.296	111.829	239.343	65.4311
9.77	229.112	109.378	239.236	64.2081
9.8	228.912	107.54	239.16	62.6793
9.83	228.698	106.621	239.068	60.8448
9.87	228.484	106.008	238.976	58.7045
9.9	228.254	105.701	238.885	56.4114
9.93	227.993	105.548	238.793	53.8125
9.97	227.779	105.395	238.701	51.5194
10	227.58	105.395	238.594	49.9906
10.03	227.396	105.395	238.487	48.9205
10.07	227.151	105.395	238.395	48.1561
10.1	226.89	105.548	238.288	47.6974
10.13	226.691	105.855	238.181	47.3917
10.17	226.446	106.161	238.09	47.2388
10.2	226.216	106.467	238.029	47.0859
10.23	226.002	106.774	237.952	46.9331
10.27	225.818	107.233	237.86	46.7802
10.3	225.619	107.54	237.753	46.7802
10.33	225.435	107.693	237.692	46.7802
10.37	225.282	107.693	237.601	46.6273
10.4	225.113	107.54	237.478	46.6273
10.43	224.899	107.386	237.341	46.7802
10.47	224.654	107.386	237.218	46.9331
10.5	224.424	107.08	237.111	47.0859
10.53	224.179	106.927	237.02	47.2388
10.57	223.995	106.774	236.958	47.2388
10.6	223.811	106.467	236.867	47.3917
10.63	223.643	106.161	236.79	47.3917
10.67	223.459	105.855	236.714	47.2388
10.7	223.229	105.548	236.637	47.2388
10.73	222.969	105.395	236.561	47.0859
10.77							0
10.77	222.693	105.395	236.484	46.9331			500
10.8	222.341	105.548	236.393	46.7802
10.83	221.942	106.008	236.377	46.6273
10.87	221.529	107.08	236.408	46.1687
10.9	221.1	108.459	236.393	45.5572
10.93	220.702	110.144	236.362	44.9457
10.97	220.273	112.135	236.27	44.3342
11	219.798	114.587	236.194	43.7227
11.03	219.338	117.191	236.133	43.1111
11.07	218.94	119.948	236.072	42.3468
11.1	218.511	122.859	236.011	41.7353
11.13	218.097	125.923	235.934	41.1238
11.17	217.684	129.14	235.842	40.3594
11.2	217.239	132.51	235.735	39.9007
11.23	216.81	136.033	235.628	39.4421
11.27	216.397	139.863	235.491	38.9835
11.3	215.937	143.693	235.384	38.6777
11.33	215.478	147.829	235.262	38.5249
11.37	215.049	151.812	235.155	38.372
11.4	214.65	155.948	235.048	38.372
11.43	214.252	160.084	234.971	38.372
11.47	213.823	164.22	234.895	38.372
11.5	213.379	168.356	234.788	38.372
11.53	212.935	172.646	234.681	38.5249
11.57	212.521	176.782	234.558	38.6777
11.6	212.062	180.765	234.467	38.8306
11.63	211.633	184.748	234.39	38.9835
11.67	211.204	188.577	234.314	39.1364
11.7	210.775	192.101	234.222	39.2892
11.73	210.376	195.318	234.13	39.595
11.77	209.963	198.228	234.054	39.9007
11.8	209.519	201.139	233.947	40.3594
11.83	209.059	203.897	233.855	40.9709
11.87	208.6	206.501	233.763	41.5824
11.9	208.14	208.952	233.687	42.041
11.93	207.696	210.943	233.611	42.6525
11.97	207.236	212.628	233.519	43.1111
12	206.792	214.007	233.396	43.7227
12.03	206.348	214.926	233.289	44.3342
12.07	205.919	215.692	233.167	45.0985
12.1	205.505	215.999	233.075	45.71
12.13	205.107	216.152	232.984	46.4744
12.17	204.662	216.305	232.892	47.0859
12.2	204.264	216.458	232.785	47.5446
12.23	203.851	216.458	232.678	47.8503
12.27	203.437	216.305	232.556	48.0032
12.3	203.023	216.305	232.433	48.3089
12.33	202.594	216.152	232.342	48.4618
12.37	202.15	216.305	232.235	48.6147
12.4	201.752	216.152	232.143	48.7676
12.43	201.308	216.152	232.051	48.7676
12.47	200.863	215.999	231.99	48.6147
12.5	200.45	215.999	231.883	48.6147
12.53	200.051	215.845	231.791	48.4618
12.57	199.638	215.539	231.715	48.3089
12.6	199.224	215.386	231.654	48.1561
12.63	198.811	215.079	231.562	48.1561
12.67	198.397	214.926	231.455	48.1561
12.7	197.983	214.773	231.379	48.0032
12.73	197.508	214.62	231.287	48.0032
12.77	197.064	214.314	231.195	48.0032
12.8	196.635	214.16	231.103	47.8503
12.83	196.222	214.007	230.996	47.8503
12.87	195.823	213.701	230.889	47.8503
12.9	195.425	213.394	230.798	47.8503
12.93	195.149	212.935	230.69	47.8503
12.97	194.843	212.169	230.599	48.0032
13								0
13	194.475	211.403	230.522	47.8503				500
13.03	194.046	210.637	230.446	47.8503
13.07	193.571	209.871	230.385	47.6974
13.1	193.127	209.258	230.354	47.3917
13.13	192.683	208.645	230.324	46.9331
13.17	192.239	208.186	230.247	46.6273
13.2	191.794	207.88	230.14	46.1687
13.23	191.365	207.573	230.018	45.8629
13.27	190.921	207.42	229.911	45.5572
13.3	190.492	207.42	229.773	45.2514
13.33	190.018	207.42	229.62	45.0985
13.37	189.527	207.726	229.468	45.0985
13.4	189.068	208.033	229.33	45.2514
13.43	188.639	208.492	229.192	45.5572
13.47	188.179	208.799	229.024	45.8629
13.5	187.75	209.258	228.887	46.3216
13.53	187.306	209.718	228.734	46.7802
13.57	186.877	210.024	228.55	47.3917
13.6	186.387	210.637	228.382	48.3089
13.63	185.881	211.25	228.214	49.2262
13.67	185.437	211.862	228.092	50.2963
13.7	185.008	212.628	227.954	51.3665
13.73	184.579	213.241	227.801	52.4366
13.77	184.135	213.854	227.648	53.5067
13.8	183.691	214.62	227.511	54.5769
13.83	183.246	215.386	227.358	55.7999
13.87	182.817	215.999	227.22	57.0229
13.9	182.343	216.764	227.052	58.2459
13.93	181.914	217.377	226.899	59.316
13.97	181.469	218.143	226.746	60.5391
14	181.01	218.756	226.548	61.7621
14.03	180.55	219.522	226.364	63.138
14.07	180.091	220.288	226.226	64.361
14.1	179.647	221.054	226.058	65.584
14.13	179.172	221.973	225.905	66.807
14.17	178.681	222.892	225.753	68.1829
14.2	178.222	223.811	225.6	69.4059
14.23	177.747	224.73	225.447	70.6289
14.27	177.287	225.343	225.309	71.699
14.3	176.843	225.65	225.187	72.7692
14.33	176.414	225.803	225.049	73.6864
14.37	175.97	225.956	224.942	74.4508
14.4	175.495	226.109	224.805	75.0623
14.43	174.989	226.262	224.667	75.5209
14.47	174.545	226.569	224.499	75.8267
14.5	174.101	226.722	224.361	75.8267
14.53	173.641	226.875	224.209	75.8267
14.57	173.197	227.028	224.056	75.8267
14.6	172.784	227.028	223.903	75.8267
14.63	172.37	226.875	223.75	75.6738
14.67	171.926	226.722	223.597	75.5209
14.7	171.481	226.722	223.429	75.5209
14.73	171.037	226.722	223.245	75.5209
14.77	170.578	226.722	223.077	75.5209
14.8	170.103	226.722	222.924	75.5209
14.83	169.674	226.569	222.802	75.3681
14.87	169.23	226.569	222.665	75.2152
14.9	168.785	226.416	222.527	75.2152
14.93	168.341	226.262	222.374	75.2152
14.97	167.851	226.262	222.252	75.0623
15	167.422	226.416	222.129	74.9094
15.03	166.978	226.262	221.992	74.7566
15.07	166.549	226.262	221.839	74.6037
15.1	166.089	226.109	221.701	74.4508
15.13	165.63	225.956	221.564	74.1451
15.17	165.201	225.803	221.426	73.9922
15.2	164.756	225.65	221.273	73.6864
15.23	164.297	225.496	221.136	73.3807
15.27	163.822	225.343	221.013	73.2278
15.3	163.393	225.037	220.861	72.9221
15.33	162.995	224.73	220.708	72.7692
15.37	162.596	224.424	220.585	72.6163
15.4	162.198	223.964	220.433	72.4634
15.43	161.861	223.352	220.249	72.4634
15.47	161.539	222.433	220.096	72.6163
15.5	161.218	221.513	219.943	72.6163

[truncated: 3 more sheets: 5 mg.ml primary data n=2, 5 mg.ml primary data n=3, Average values and fold change]
