# Supplementary material for: Towards a molecular mechanism underlying mitochondrial protein import through the TOM and TIM23 complexes
Source: eLife. 2022 Jun 8;11:e75426. doi: 10.7554/eLife.75426 (PMC9255969; doi:10.7554/eLife.75426)
Supplement: Figure 5—figure supplement 1—source data 2. [file elife-75426-fig5-figsupp1-data2.xlsx]

## Sheet: primary data n=1
	mitochondria								mitoplasts
time (min)	0.1	0.16	0.25	0.4	0.63	1	1.58	2.5	0.1	0.16	0.25	0.4	0.63	1	1.58	2.5	PCP (µM)
0
0.43	0.024846	0.027308	0.038576	0.030345	0.02735	0.027339	0.029768	0.021057	0.034032	0.039192	0.044252	0.049968	0.03343	0.03613	0.040336	0.046502
0.53	0.039905	0.043805	0.058917	0.049307	0.048672	0.048296	0.05072	0.041818	0.051377	0.056136	0.064986	0.071989	0.057422	0.059959	0.063131	0.0758
0.63	0.05534	0.061647	0.083273	0.072959	0.073291	0.07263	0.07572	0.067647	0.068534	0.078583	0.087974	0.09637	0.083873	0.086722	0.092872	0.1081
0.73	0.072042	0.082016	0.108597	0.096813	0.103849	0.100787	0.102954	0.093886	0.090235	0.100546	0.113834	0.123071	0.112101	0.114522	0.124193	0.144967
0.83	0.09451	0.10347	0.13352	0.124367	0.133857	0.128208	0.133567	0.125906	0.110311	0.124099	0.138484	0.147883	0.144506	0.142723	0.15568	0.179848
0.93	0.115233	0.124472	0.160701	0.150556	0.164222	0.158919	0.163045	0.157247	0.132907	0.147162	0.164493	0.176739	0.175382	0.174843	0.187462	0.217841
1.03	0.136759	0.147477	0.18773	0.178682	0.197022	0.189151	0.193454	0.19171	0.154129	0.169277	0.189648	0.202842	0.207853	0.203445	0.216042	0.256519
1.13	0.158446	0.170471	0.215025	0.206764	0.228824	0.220115	0.223797	0.223078	0.176546	0.193819	0.211882	0.23127	0.239597	0.231607	0.246854	0.290753
1.23	0.180423	0.194189	0.241772	0.2335	0.262768	0.249134	0.255767	0.26148	0.198274	0.213336	0.238417	0.254648	0.2696	0.261458	0.273903	0.326883
1.33	0.203113	0.216058	0.26816	0.259316	0.294277	0.277307	0.284286	0.289313	0.220577	0.238466	0.260524	0.276705	0.297035	0.289443	0.301576	0.356081
1.43	0.227044	0.241868	0.292643	0.28695	0.327065	0.306257	0.312589	0.322884	0.242463	0.258796	0.285375	0.298693	0.326695	0.312769	0.328555	0.388298
1.53	0.248493	0.261576	0.318169	0.314015	0.359144	0.335218	0.338015	0.350872	0.261505	0.277084	0.310522	0.320258	0.353381	0.338493	0.354155	0.424436
1.63	0.266676	0.282622	0.344377	0.332543	0.386996	0.356676	0.363402	0.383356	0.280102	0.300163	0.331769	0.344676	0.378653	0.361753	0.37454	0.451833
1.73	0.2907	0.302935	0.365039	0.358127	0.416457	0.38159	0.39015	0.412182	0.300122	0.318876	0.349114	0.363383	0.409501	0.382771	0.396769	0.472149
1.83	0.312514	0.324661	0.389536	0.378431	0.443898	0.40876	0.415377	0.434524	0.318719	0.338173	0.367871	0.381889	0.429731	0.401602	0.418853	0.497741
1.93	0.330075	0.345629	0.411607	0.401105	0.465375	0.429226	0.434916	0.4609	0.337728	0.355631	0.388384	0.398648	0.449442	0.424773	0.436682	0.525303
2.03	0.349874	0.362134	0.426495	0.423579	0.494883	0.451988	0.457913	0.483231	0.355028	0.371133	0.402998	0.421183	0.471353	0.443276	0.46223	0.551445
2.13	0.368667	0.382273	0.450899	0.442638	0.519419	0.471065	0.482303	0.505018	0.36775	0.389235	0.42411	0.435281	0.49239	0.462111	0.475357	0.568016
2.23	0.382743	0.399756	0.461904	0.459256	0.541095	0.486316	0.501071	0.530753	0.384396	0.407942	0.441239	0.453403	0.505277	0.479763	0.496505	0.588705
2.33	0.402581	0.414503	0.488162	0.475736	0.56326	0.504973	0.516379	0.551442	0.401926	0.421026	0.458198	0.469454	0.522777	0.498175	0.509467	0.610743
2.43	0.418475	0.432274	0.499935	0.496431	0.57822	0.522263	0.538644	0.570075	0.41379	0.435787	0.469968	0.485887	0.532124	0.514848	0.528915	0.628406
2.53	0.43425	0.445755	0.517935	0.51411	0.599221	0.543463	0.556074	0.587066	0.429328	0.453043	0.482568	0.499885	0.545721	0.530971	0.539224	0.646356
2.63	0.452101	0.460245	0.534819	0.530203	0.618006	0.557152	0.570249	0.60775	0.441947	0.463849	0.500363	0.513947	0.55527	0.540675	0.555729	0.663148
2.73	0.465306	0.475742	0.549557	0.542654	0.636341	0.5706	0.586469	0.624708	0.4571	0.477438	0.507389	0.52687	0.568638	0.556726	0.571946	0.680245
2.83	0.476518	0.487518	0.561013	0.556433	0.651461	0.585082	0.600738	0.64388	0.469717	0.488982	0.524198	0.542015	0.578944	0.574591	0.584546	0.691803
2.93	0.494037	0.501563	0.575376	0.569133	0.66605	0.602726	0.615085	0.653763	0.479301	0.500648	0.531342	0.54948	0.592843	0.58425	0.595161	0.710626
3.03	0.509594	0.513834	0.592331	0.58456	0.680383	0.609889	0.626281	0.668474	0.494889	0.516233	0.542383	0.567881	0.599053	0.598456	0.605456	0.722101
3.13	0.520132	0.527777	0.609613	0.598511	0.693944	0.628522	0.640163	0.687549	0.507123	0.524866	0.556605	0.574497	0.608272	0.609483	0.618531	0.73485
3.23	0.532171	0.536991	0.616671	0.610276	0.707967	0.639148	0.652243	0.69691	0.514298	0.536897	0.561546	0.587185	0.618001	0.621231	0.632513	0.749116
3.33	0.54985	0.548797	0.633651	0.619092	0.718038	0.653423	0.666877	0.71604	0.521774	0.544246	0.574143	0.5942	0.633209	0.630929	0.645994	0.760879
3.43	0.558352	0.560521	0.64396	0.635475	0.736262	0.664796	0.677257	0.724423	0.533691	0.555897	0.584361	0.606705	0.640105	0.640818	0.655999	0.77245
3.53	0.567179	0.574572	0.65473	0.642849	0.743453	0.677252	0.69128	0.739789	0.543488	0.56761	0.593304	0.612183	0.649825	0.650419	0.659818	0.788919
3.63	0.578808	0.582567	0.6667	0.657715	0.756866	0.683788	0.700218	0.751761	0.552805	0.573823	0.598494	0.62651	0.661432	0.656748	0.674482	0.801679
3.73	0.590587	0.592494	0.677611	0.663933	0.770955	0.696589	0.711776	0.762067	0.562284	0.586403	0.606296	0.63005	0.666852	0.671733	0.679999	0.804518
3.83	0.599705	0.603165	0.686018	0.673673	0.775338	0.711193	0.721537	0.775372	0.570448	0.594868	0.613827	0.640939	0.674867	0.680098	0.689031	0.817233
3.93	0.607999	0.605511	0.693569	0.683697	0.789455	0.717842	0.727792	0.784649	0.5783	0.603159	0.62399	0.646649	0.679062	0.686712	0.697946	0.826472
4.03	0.618982	0.621458	0.704195	0.694008	0.799532	0.730229	0.736387	0.792714	0.584673	0.608104	0.632955	0.659252	0.686405	0.696794	0.710084	0.83627
4.13	0.628735	0.628143	0.712232	0.701136	0.804694	0.73705	0.744517	0.80821	0.594144	0.618233	0.635453	0.670171	0.695346	0.702274	0.71433	0.845177
4.23	0.634591	0.644189	0.719241	0.714164	0.809514	0.744993	0.757101	0.813726	0.597309	0.624313	0.644004	0.675115	0.699588	0.710353	0.720844	0.854803
4.33	0.641205	0.645823	0.732777	0.721427	0.822642	0.753964	0.766157	0.822067	0.612006	0.633729	0.65292	0.682439	0.700583	0.724199	0.732283	0.855135
4.43	0.652116	0.65921	0.739642	0.725686	0.830245	0.762421	0.772904	0.831267	0.614878	0.639325	0.656474	0.687414	0.710916	0.723408	0.736561	0.868688
4.53	0.660064	0.662201	0.745242	0.734311	0.838682	0.772315	0.777759	0.839545	0.623028	0.646226	0.660172	0.692353	0.719368	0.729939	0.742674	0.876048
4.63	0.671271	0.668961	0.747643	0.741881	0.846938	0.772732	0.785036	0.847258	0.627533	0.653406	0.662123	0.699168	0.723726	0.735956	0.745576	0.883482
4.73	0.68166	0.669353	0.761699	0.744927	0.851611	0.781222	0.792581	0.854079	0.637159	0.660479	0.670724	0.698198	0.725105	0.73781	0.750233	0.891856
4.83	0.684459	0.681074	0.766796	0.755586	0.860673	0.787698	0.79894	0.865358	0.637253	0.663522	0.682027	0.70189	0.734073	0.748207	0.755857	0.89467
4.93	0.687312	0.688119	0.778218	0.760265	0.868343	0.794632	0.803103	0.871546	0.652044	0.66791	0.685604	0.711632	0.731658	0.751764	0.766436	0.900788
5.03	0.697018	0.695127	0.778365	0.765522	0.867469	0.803197	0.81214	0.874699	0.658398	0.678136	0.689644	0.719926	0.731553	0.754641	0.771444	0.903795
5.13	0.701451	0.70328	0.782698	0.769573	0.872275	0.797445	0.813762	0.883651	0.656355	0.679819	0.692864	0.722919	0.735267	0.762841	0.779851	0.907513
5.23	0.711389	0.707434	0.787419	0.775145	0.878143	0.809547	0.821744	0.891265	0.661507	0.686535	0.694503	0.727416	0.73878	0.764483	0.780468	0.915116
5.33	0.719177	0.715344	0.797711	0.781275	0.883195	0.819909	0.829026	0.899672	0.67139	0.693989	0.699773	0.733847	0.744357	0.768775	0.782068	0.918031
5.43	0.72094	0.722344	0.801093	0.779451	0.885102	0.824107	0.834418	0.90552	0.678985	0.699925	0.706727	0.739609	0.748743	0.772577	0.790061	0.918822
5.53	0.728062	0.724691	0.807513	0.782068	0.895286	0.82645	0.838058	0.911205	0.679106	0.701293	0.707622	0.741328	0.756697	0.779904	0.794303	0.924717
5.63	0.733266	0.727678	0.810214	0.789505	0.894841	0.831732	0.844746	0.917244	0.688997	0.709537	0.712834	0.743301	0.758129	0.780545	0.800637	0.929769
5.73	0.737694	0.735848	0.817261	0.795436	0.895137	0.838155	0.841963	0.919944	0.687632	0.708669	0.715581	0.740762	0.763175	0.782831	0.798891	0.931358
5.83	0.745819	0.73729	0.820691	0.793142	0.90044	0.836579	0.851686	0.918896	0.692712	0.713431	0.717386	0.74677	0.769009	0.795748	0.802384	0.93104
5.93	0.7491	0.742845	0.824955	0.799866	0.896919	0.845622	0.856439	0.927464	0.699961	0.717613	0.726136	0.748605	0.767047	0.796376	0.806159	0.933876
6.03	0.75319	0.749033	0.825674	0.803708	0.901894	0.850879	0.858675	0.931073	0.703885	0.716985	0.725481	0.749445	0.775311	0.795721	0.814138	0.938389
6.13	0.759685	0.751675	0.832296	0.80915	0.909961	0.852703	0.864902	0.931037	0.709125	0.727745	0.726744	0.751211	0.774236	0.800565	0.813817	0.946859
6.23	0.763349	0.756686	0.833901	0.80994	0.910685	0.855513	0.870366	0.942286	0.712378	0.731202	0.732089	0.75374	0.776151	0.804064	0.817645	0.938018
6.33	0.768625	0.762189	0.83813	0.813989	0.917064	0.865059	0.875664	0.938444	0.709888	0.732899	0.734225	0.755141	0.780786	0.807118	0.822827	0.943269
6.43	0.773832	0.764673	0.840114	0.816534	0.917578	0.861527	0.877839	0.943692	0.711171	0.731882	0.738269	0.753381	0.787087	0.808276	0.82726	0.944433
6.53	0.77918	0.7675	0.848441	0.822073	0.916254	0.865413	0.878657	0.948791	0.722803	0.739305	0.742304	0.756719	0.788505	0.806585	0.827827	0.939613
6.63	0.781399	0.775897	0.849331	0.826804	0.923263	0.869219	0.886351	0.95622	0.725238	0.740651	0.739322	0.762739	0.784406	0.809155	0.828902	0.945461
6.73	0.784597	0.774247	0.853319	0.831837	0.923556	0.876584	0.8871	0.95577	0.720979	0.743865	0.742265	0.766857	0.786609	0.811623	0.833586	0.945804
6.83	0.78523	0.778121	0.851354	0.830098	0.928893	0.876802	0.891027	0.960465	0.724061	0.741524	0.745938	0.760221	0.789071	0.819035	0.832622	0.942824
6.93	0.792023	0.779528	0.853836	0.834871	0.929711	0.879657	0.890776	0.958108	0.72526	0.749028	0.748058	0.763863	0.792462	0.816692	0.840432	0.939699
7.03	0.797984	0.786965	0.856837	0.838014	0.936407	0.881407	0.890767	0.96714	0.732924	0.749769	0.747367	0.761614	0.793935	0.819339	0.842425	0.941733
7.13	0.796605	0.790652	0.862975	0.844837	0.932991	0.877899	0.897851	0.967153	0.734665	0.754171	0.755288	0.764427	0.798086	0.818463	0.844945	0.944624
7.23	0.800789	0.789569	0.861685	0.842579	0.930457	0.885591	0.895839	0.970108	0.734427	0.758366	0.755509	0.771679	0.79883	0.822443	0.843671	0.945972
7.33	0.802174	0.795104	0.862611	0.845232	0.931781	0.88501	0.90075	0.971183	0.73991	0.754453	0.757877	0.767603	0.796445	0.826224	0.849737	0.943631
7.43	0.80614	0.797136	0.867536	0.850337	0.934851	0.883275	0.901902	0.971351	0.743437	0.757092	0.758781	0.77072	0.803078	0.826448	0.849397	0.946959
7.53	0.807552	0.797332	0.868594	0.852225	0.939226	0.888913	0.903724	0.974693	0.74737	0.758463	0.756703	0.774595	0.802235	0.827373	0.8489	0.952848
7.63	0.811446	0.802729	0.868561	0.849867	0.935238	0.88943	0.910063	0.973908	0.747149	0.763587	0.761896	0.774468	0.806466	0.834321	0.85668	0.95059
7.73	0.816349	0.801566	0.868613	0.85791	0.942227	0.893838	0.908563	0.975643	0.749829	0.766008	0.762891	0.775944	0.810109	0.83101	0.853242	0.95307
7.83	0.814149	0.804208	0.871955	0.856074	0.939679	0.896997	0.913272	0.981152	0.752391	0.763996	0.763463	0.7812	0.806126	0.83174	0.853435	0.954974
7.93	0.824776	0.813361	0.878629	0.859642	0.945154	0.895609	0.912103	0.980698	0.754597	0.764162	0.762636	0.782195	0.808431	0.833973	0.858305	0.95606
8.03	0.821039	0.814658	0.878372	0.863285	0.946724	0.897497	0.916309	0.981588	0.754727	0.767324	0.765099	0.781634	0.811991	0.83876	0.858169	0.957356
8.13	0.824333	0.815307	0.878585	0.861223	0.945353	0.899075	0.917498	0.98247	0.755086	0.766564	0.770861	0.780835	0.813323	0.840238	0.858086	0.953581
8.23	0.823059	0.816802	0.874121	0.865745	0.950436	0.901209	0.918216	0.979753	0.755824	0.769722	0.766674	0.783699	0.814304	0.843243	0.861135	0.961037
8.33	0.828421	0.814	0.882816	0.866004	0.947818	0.900847	0.918197	0.984692	0.761119	0.775195	0.769338	0.784235	0.813635	0.840142	0.862716	0.95551
8.43	0.832052	0.818206	0.878054	0.863948	0.953053	0.905249	0.923409	0.985678	0.7616	0.775518	0.77027	0.787062	0.818853	0.842858	0.859911	0.956284
8.53	0.835499	0.824839	0.885091	0.867997	0.95556	0.903176	0.921281	0.988553	0.765475	0.776789	0.773393	0.783447	0.818355	0.842773	0.864788	0.963842
8.63	0.8293	0.823344	0.883988	0.869741	0.959092	0.906636	0.927624	0.987375	0.768741	0.779387	0.771787	0.787786	0.821647	0.846882	0.863166	0.963818
8.73	0.836745	0.828993	0.886301	0.870739	0.96143	0.906725	0.930197	0.991408	0.765826	0.782004	0.774354	0.789309	0.82312	0.849033	0.864794	0.963022
8.83	0.837491	0.826942	0.886155	0.867936	0.964647	0.907745	0.929678	0.992057	0.770369	0.78083	0.775421	0.790334	0.821832	0.848206	0.866988	0.967079
8.93	0.840037	0.831232	0.887086	0.870761	0.962908	0.906612	0.931703	0.99227	0.769018	0.782712	0.774114	0.788156	0.825693	0.852037	0.870891	0.968508
9.03	0.840686	0.83253	0.878698	0.872889	0.963461	0.910215	0.927058	0.990252	0.771768	0.782988	0.779716	0.792755	0.825748	0.850008	0.864346	0.968016
9.13	0.843146	0.836776	0.888344	0.872701	0.961568	0.910312	0.926762	0.987688	0.768459	0.777149	0.777458	0.792777	0.827412	0.846191	0.869232	0.96916
9.23	0.844365	0.834672	0.884908	0.871764	0.967844	0.911584	0.92947	0.988804	0.777215	0.778058	0.779047	0.792366	0.828039	0.848958	0.87301	0.966609
9.33	0.844063	0.840352	0.886185	0.875125	0.969102	0.915218	0.926574	0.991134	0.774319	0.780592	0.780822	0.793529	0.825431	0.849652	0.871518	0.971672
9.43	0.844135	0.840153	0.891986	0.878449	0.967919	0.916428	0.929564	0.990413	0.776952	0.782176	0.783079	0.792805	0.826445	0.849422	0.873433	0.97283
9.53	0.850318	0.836814	0.889037	0.881271	0.970293	0.916315	0.929871	0.988113	0.776225	0.784016	0.781153	0.793734	0.833304	0.850649	0.873635	0.974754
9.63	0.842568	0.83596	0.892091	0.877482	0.968397	0.917954	0.931927	0.99547	0.775747	0.781236	0.779771	0.794626	0.831721	0.852692	0.873024	0.975726
9.73	0.850055	0.841206	0.893221	0.873522	0.969889	0.92056	0.930628	0.996943	0.772097	0.78337	0.780998	0.79776	0.831765	0.853355	0.876396	0.978554
9.83	0.847388	0.839033	0.892522	0.878491	0.968718	0.9166	0.935144	0.989799	0.781056	0.788764	0.782955	0.799073	0.834501	0.850215	0.876885	0.977368
9.93	0.851205	0.843972	0.89792	0.88296	0.976321	0.918239	0.933726	0.990844	0.783091	0.784279	0.784674	0.80027	0.838685	0.857885	0.880218	0.976672
10.03	0.850793	0.841142	0.891923	0.880097	0.975353	0.916334	0.938157	0.996982	0.780111	0.787372	0.781383	0.798772	0.834308	0.855856	0.875191	0.977465
10.13	0.853712	0.84759	0.897447	0.879384	0.974715	0.926698	0.933193	0.994757	0.778624	0.78722	0.784649	0.796583	0.833711	0.854563	0.880133	0.977423
10.23	0.855513	0.846269	0.900214	0.884812	0.972319	0.923061	0.93555	0.994768	0.780307	0.784821	0.780183	0.804147	0.842071	0.859396	0.878814	0.971144
10.33	0.849193	0.845257	0.904025	0.882457	0.970871	0.921254	0.931385	0.992356	0.781272	0.786294	0.78471	0.801555	0.835427	0.85802	0.878027	0.97595
10.43	0.855464	0.8457	0.898381	0.885323	0.973308	0.924852	0.937634	0.991333	0.783629	0.783895	0.783248	0.799452	0.836074	0.858476	0.881537	0.976699
10.53	0.85684	0.848748	0.904227	0.886061	0.97152	0.920549	0.932966	0.990219	0.77952	0.785282	0.783102	0.799758	0.838553	0.855143	0.878615	0.972924
10.63	0.859095	0.847604	0.900059	0.886243	0.970627	0.921768	0.93843	0.992828	0.782173	0.787559	0.785945	0.799858	0.833202	0.854488	0.878883	0.971683
10.73	0.859302	0.849519	0.90387	0.881901	0.972122	0.924855	0.936556	0.99261	0.784395	0.785122	0.784334	0.805811	0.842894	0.857288	0.880671	0.970133
10.83	0.860751	0.843348	0.902773	0.882335	0.973681	0.925502	0.931609	0.990156	0.782756	0.78547	0.783986	0.802055	0.837663	0.852963	0.873303	0.967162
10.93	0.859656	0.851451	0.90094	0.886354	0.977462	0.922332	0.937128	0.987533	0.781587	0.78874	0.784746	0.802119	0.842778	0.854977	0.879281	0.967057
11.03	0.859167	0.851476	0.903638	0.885759	0.973714	0.921862	0.932875	0.997706	0.783685	0.789243	0.787999	0.806897	0.843284	0.856409	0.882161	0.966894
11.13	0.860292	0.852631	0.90219	0.886318	0.97529	0.925781	0.936366	0.994199	0.780938	0.794803	0.788314	0.808083	0.839379	0.853023	0.882236	0.9662
11.23	0.86211	0.848292	0.907479	0.882145	0.971802	0.925642	0.935393	0.990637	0.785017	0.799579	0.78547	0.805092	0.839874	0.849712	0.880683	0.966579
11.33	0.860676	0.844232	0.905514	0.885737	0.976727	0.930835	0.934821	0.99099	0.781919	0.800195	0.786916	0.808782	0.845998	0.855779	0.879641	0.966316
11.43	0.863221	0.848726	0.910249	0.889659	0.976484	0.926414	0.931817	0.996153	0.777577	0.798172	0.784635	0.810957	0.839285	0.854596	0.879864	0.966579
11.53	0.866604	0.850345	0.906822	0.886674	0.979322	0.930551	0.933768	0.996103	0.772168	0.798567	0.784724	0.80944	0.843489	0.85301	0.877032	0.964417
11.63	0.860499	0.854563	0.902742	0.892826	0.978275	0.925731	0.935639	0.994821	0.773332	0.799319	0.787935	0.807066	0.842267	0.853582	0.883261	0.959899
11.73	0.863409	0.849312	0.902303	0.887741	0.985361	0.922851	0.935572	0.999027	0.777643	0.798799	0.784926	0.814547	0.834404	0.852451	0.880428	0.964282
11.83	0.86339	0.855765	0.904616	0.886857	0.984982	0.92179	0.928003	0.997131	0.77195	0.800657	0.787145	0.808182	0.837245	0.852153	0.881158	0.960092
11.93	0.869633	0.850144	0.905338	0.889139	0.982865	0.924639	0.932414	0.994882	0.776554	0.799294	0.786426	0.804216	0.840647	0.852421	0.87754	0.959595
12.03	0.862503	0.85312	0.905716	0.880155	0.984333	0.923058	0.93864	0.992903	0.773506	0.80129	0.787753	0.804595	0.841905	0.848168	0.878425	0.965299
12.13	0.867442	0.847941	0.901029	0.884734	0.984869	0.928964	0.929304	1	0.776278	0.801436	0.787474	0.802768	0.84143	0.852957	0.877858	0.957823
12.23	0.87238	0.847192	0.9088	0.887653	0.989614	0.927862	0.931855	0.991703	0.772906	0.795721	0.791172	0.800317	0.841645	0.85286	0.883521	0.961853
12.33	0.868373	0.846877	0.905338	0.892671	0.988514	0.926856	0.928741	0.988514	0.771215	0.795104	0.794709	0.798758	0.840606	0.852946	0.878043	0.964627
12.43	0.869901	0.851053	0.907618	0.891002	0.985394	0.927917	0.928041	0.986038	0.774653	0.796282	0.792211	0.801793	0.839887	0.854897	0.869758	0.962032
12.53	0.867151	0.853562	0.907413	0.888667	0.986756	0.930739	0.926535	0.988006	0.770784	0.799286	0.788051	0.796099	0.843992	0.853029	0.884436	0.962093
12.63	0.868729	0.849174	0.900811	0.887197	0.988	0.930299	0.92826	0.986991	0.770214	0.800071	0.789856	0.801339	0.841852	0.855306	0.878422	0.966689
12.73	0.86855	0.84958	0.901562	0.888529	0.983628	0.923785	0.927842	0.985073	0.769325	0.79605	0.790865	0.80635	0.844058	0.85495	0.879967	0.968491
12.83	0.865703	0.851111	0.899802	0.890626	0.985021	0.923509	0.927301	0.984556	0.771226	0.794289	0.787642	0.807524	0.843826	0.849458	0.881829	0.966485
12.93	0.866554	0.850431	0.90206	0.891265	0.984869	0.924769	0.928945	0.980444	0.774772	0.793446	0.792111	0.805233	0.840073	0.852321	0.8822	0.969046
13.03	0.863785	0.850741	0.90122	0.891602	0.97369	0.92669	0.927989	0.982357	0.772975	0.79113	0.793996	0.804418	0.839763	0.849986	0.878673	0.966009
13.13	0.86567	0.853236	0.901629	0.892204	0.974292	0.924233	0.924775	0.980201	0.775388	0.790312	0.794966	0.803384	0.84151	0.848847	0.881147	0.97113
13.23	0.865971	0.850005	0.899205	0.893506	0.975113	0.923462	0.923888	0.982848	0.777643	0.787792	0.793308	0.806179	0.839213	0.848179	0.878217	0.969782
13.33	0.864979	0.850514	0.898384	0.889316	0.977197	0.920997	0.926748	0.980386	0.7742	0.795077	0.795555	0.806394	0.842883	0.851619	0.879221	0.968239
13.43	0.869617	0.851481	0.902253	0.889341	0.974021	0.922423	0.923407	0.98496	0.775872	0.785478	0.788643	0.801392	0.840661	0.851816	0.876197	0.970108
13.53	0.860353	0.851799	0.900982	0.889551	0.970403	0.921514	0.923456	0.981704	0.776079	0.786426	0.785208	0.801911	0.842596	0.852028	0.874334	0.969516
13.63	0.859242	0.850821	0.9002	0.888319	0.967488	0.922542	0.925695	0.986784	0.774683	0.791114	0.788369	0.800563	0.842079	0.852824	0.876645	0.967311
13.73	0.862876	0.849419	0.903643	0.887741	0.969655	0.920889	0.923349	0.984153	0.776944	0.795419	0.790771	0.799521	0.842787	0.852125	0.875857	0.969906
13.83	0.860825	0.847399	0.903411	0.885842	0.967106	0.915284	0.922976	0.986018	0.77601	0.794474	0.790765	0.797782	0.84311	0.854035	0.874439	0.966963
13.93	0.859217	0.846634	0.902784	0.885353	0.972263	0.913648	0.919128	0.985944	0.777348	0.791829	0.790644	0.799231	0.847001	0.850401	0.87146	0.968472
14.03	0.854087	0.850951	0.902226	0.888393	0.970788	0.910008	0.923783	0.98182	0.772611	0.789104	0.788209	0.801834	0.84167	0.854941	0.878543	0.970345
14.13	0.859333	0.849746	0.905069	0.891337	0.968309	0.904995	0.92153	0.977943	0.774667	0.793305	0.789776	0.801267	0.845285	0.846092	0.875191	0.968552
14.23	0.859021	0.852252	0.898182	0.885751	0.966979	0.904608	0.920878	0.980414	0.778102	0.793676	0.785395	0.800737	0.847051	0.844865	0.871524	0.968535
14.33	0.85852	0.848372	0.900067	0.886215	0.967944	0.909516	0.917412	0.978982	0.775266	0.790986	0.785777	0.808309	0.845396	0.844594	0.870106	0.967623
14.43	0.852556	0.84804	0.899677	0.888916	0.964553	0.905534	0.916243	0.977935	0.775557	0.786957	0.785155	0.801585	0.846739	0.84618	0.869735	0.968889
14.53	0.854712	0.849547	0.897712	0.884903	0.966479	0.906874	0.918216	0.976127	0.775797	0.786233	0.790066	0.802691	0.847714	0.840448	0.871847	0.967687
14.63	0.854367	0.845125	0.903671	0.883443	0.971025	0.907557	0.91087	0.972134	0.776035	0.791409	0.787847	0.797337	0.847747	0.83947	0.865466	0.966852
14.73	0.858316	0.841828	0.904998	0.882269	0.972446	0.91194	0.91228	0.97702	0.772688	0.788822	0.781836	0.80412	0.849182	0.837922	0.870261	0.968389
14.83	0.855544	0.845802	0.898036	0.885931	0.970356	0.908513	0.915171	0.974016	0.769112	0.787407	0.780783	0.808832	0.85003	0.837292	0.869285	0.963724
14.93	0.85008	0.846407	0.903143	0.881136	0.963453	0.908731	0.91666	0.966794	0.775861	0.791556	0.780042	0.806568	0.846833	0.836295	0.867939	0.965213
15.03	0.85338	0.846056	0.903204	0.876507	0.964017	0.910384	0.911769	0.97647	0.777361	0.786929	0.786155	0.80564	0.846457	0.840457	0.866405	0.964727
15.13	0.850823	0.849273	0.905636	0.883399	0.969295	0.90856	0.921414	0.971097	0.77402	0.789502	0.784834	0.805161	0.849367	0.838953	0.867732	0.968762
15.23	0.847604	0.84691	0.898644	0.879422	0.969732	0.908422	0.918642	0.970169	0.774885	0.789804	0.786283	0.804719	0.845144	0.839252	0.867312	0.968812
15.33	0.848389	0.844412	0.899147	0.883471	0.970981	0.910583	0.913792	0.971857	0.77357	0.781919	0.785255	0.807428	0.846672	0.839556	0.864703	0.966883
15.43	0.854599	0.84432	0.897301	0.881233	0.966512	0.910506	0.911805	0.967507	0.77803	0.784865	0.783911	0.806549	0.844224	0.832854	0.860682	0.967222
15.53	0.852758	0.842928	0.900319	0.88343	0.965995	0.909566	0.908422	0.968607	0.771342	0.782483	0.783378	0.811275	0.85063	0.838124	0.86716	0.97008
15.63	0.851794	0.839194	0.899481	0.885207	0.965302	0.91197	0.907634	0.966869	0.771359	0.781869	0.785354	0.811963	0.848762	0.838951	0.864462	0.964801
15.73	0.850157	0.837685	0.898608	0.88152	0.962566	0.907673	0.905478	0.963323	0.76909	0.783997	0.783895	0.806507	0.848894	0.84018	0.862124	0.96471
15.83	0.851393	0.837972	0.894341	0.880771	0.96324	0.905904	0.910379	0.96164	0.766895	0.790177	0.781828	0.808542	0.852578	0.835651	0.862453	0.966429
15.93	0.855469	0.842969	0.902889	0.877057	0.964965	0.906128	0.905321	0.960996	0.763742	0.784061	0.785492	0.809083	0.843867	0.836107	0.861773	0.965531
16.03	0.84838	0.837444	0.895825	0.875553	0.965274	0.907911	0.905716	0.961239	0.769916	0.786048	0.781515	0.807986	0.845456	0.836043	0.860212	0.965067
16.13	0.852791	0.838716	0.902847	0.878643	0.965968	0.90971	0.903066	0.955471	0.77331	0.789074	0.782085	0.807862	0.850329	0.836712	0.86305	0.964368
16.23	0.848944	0.83832	0.896864	0.872966	0.958713	0.907352	0.904566	0.958738	0.768736	0.781805	0.783198	0.808083	0.852191	0.838544	0.860264	0.960764
16.33	0.84694	0.841902	0.89643	0.879613	0.968864	0.902087	0.900407	0.964793	0.766492	0.78555	0.779838	0.803628	0.854858	0.833727	0.861074	0.963475
16.43	0.847709	0.840562	0.89821	0.8729	0.959755	0.902519	0.899268	0.953487	0.768924	0.787811	0.780954	0.807815	0.854466	0.833915	0.855649	0.960009
16.53	0.850519	0.838144	0.895034	0.876893	0.962159	0.911011	0.900131	0.960006	0.769037	0.780291	0.783406	0.810153	0.857434	0.8357	0.856	0.955587
16.63	0.849508	0.837201	0.890964	0.875962	0.961427	0.902615	0.902519	0.963663	0.768725	0.784434	0.781048	0.806762	0.854195	0.832326	0.851578	0.957035
16.73	0.847623	0.831942	0.896789	0.875279	0.962146	0.902121	0.899058	0.956925	0.763427	0.784276	0.775173	0.79925	0.851042	0.830712	0.860063	0.950621
16.83	0.846413	0.834238	0.892531	0.869257	0.953379	0.902687	0.89805	0.958835	0.763739	0.78253	0.780902	0.803992	0.855074	0.829468	0.860734	0.954816
16.93	0.849165	0.834686	0.894335	0.874835	0.958304	0.899244	0.897577	0.959921	0.764029	0.785288	0.779033	0.802873	0.856511	0.83072	0.848402	0.955861
17.03	0.85275	0.829864	0.888899	0.870595	0.955222	0.903251	0.897254	0.955029	0.761716	0.781101	0.774324	0.805985	0.856857	0.828103	0.85092	0.958309
17.13	0.850951	0.829488	0.888515	0.87031	0.954985	0.902306	0.898975	0.95276	0.759353	0.782682	0.776557	0.800148	0.858443	0.825845	0.849773	0.955206
17.23	0.849834	0.831765	0.887224	0.870761	0.9525	0.897668	0.89991	0.956065	0.761752	0.779622	0.776129	0.796025	0.856025	0.826881	0.849428	0.955432
17.33	0.847933	0.830729	0.89137	0.867511	0.951804	0.897276	0.893874	0.953257	0.759621	0.779335	0.773398	0.792399	0.856309	0.826594	0.848267	0.953545
17.43	0.847499	0.826503	0.889662	0.867585	0.951116	0.894974	0.900819	0.949236	0.757416	0.776856	0.769559	0.786893	0.855262	0.826146	0.84801	0.948346
17.53	0.845531	0.829822	0.889626	0.869887	0.951467	0.892873	0.89394	0.947857	0.757084	0.77748	0.769258	0.787479	0.853736	0.822603	0.844086	0.948661
17.63	0.848961	0.825419	0.884126	0.865919	0.946133	0.898323	0.894581	0.948769	0.7551	0.776179	0.768081	0.786766	0.853924	0.824936	0.845172	0.944353
17.73	0.844644	0.822595	0.884129	0.865969	0.948534	0.890458	0.897127	0.944441	0.75704	0.774255	0.769745	0.785965	0.854261	0.820044	0.841571	0.948498
17.83	0.844705	0.826276	0.880984	0.865001	0.946912	0.889642	0.889554	0.944792	0.754879	0.777198	0.760389	0.786482	0.848507	0.825088	0.841159	0.948029
17.93	0.844964	0.824778	0.883291	0.873583	0.946702	0.89004	0.890892	0.942432	0.751377	0.772873	0.764394	0.787808	0.850437	0.823007	0.838962	0.947517
18.03	0.844901	0.822921	0.881821	0.863973	0.95048	0.888523	0.886348	0.945621	0.754644	0.777497	0.763582	0.78416	0.852891	0.819898	0.838392	0.941291
18.13	0.842659	0.824764	0.883808	0.866286	0.943869	0.884928	0.891038	0.943156	0.753582	0.7704	0.765737	0.783118	0.846576	0.821219	0.836668	0.944964
18.23	0.841117	0.820973	0.881067	0.862694	0.946564	0.885162	0.889419	0.940843	0.747215	0.77638	0.764402	0.786623	0.850163	0.820832	0.835938	0.943029
18.33	0.841419	0.822247	0.879934	0.858827	0.947882	0.886846	0.888628	0.938933	0.75088	0.766989	0.763764	0.776278	0.849342	0.815293	0.837654	0.938668
18.43	0.841424	0.820978	0.87861	0.863232	0.935432	0.882274	0.887774	0.935885	0.748837	0.770798	0.760641	0.782068	0.84743	0.817479	0.836126	0.943488
18.53	0.838401	0.822343	0.875512	0.86025	0.94668	0.87793	0.887492	0.937314	0.747328	0.769877	0.756769	0.778716	0.846484	0.816708	0.835427	0.940871
18.63	0.838287	0.81893	0.878096	0.864081	0.938944	0.879431	0.883164	0.935976	0.750075	0.769452	0.757073	0.776438	0.843389	0.820262	0.831621	0.939102
18.73	0.840758	0.819723	0.874246	0.857086	0.940216	0.883999	0.885823	0.934829	0.748213	0.769427	0.759914	0.780714	0.843588	0.811604	0.834117	0.935376
18.83	0.839208	0.81806	0.874757	0.855768	0.942443	0.882739	0.88377	0.932344	0.745764	0.767307	0.758861	0.776029	0.838633	0.814058	0.829971	0.935221
18.93	0.838536	0.818604	0.874312	0.852562	0.938416	0.879367	0.878416	0.933801	0.742301	0.764496	0.756084	0.777041	0.835723	0.812013	0.830795	0.932159
19.03	0.836472	0.81594	0.872593	0.854684	0.937457	0.878397	0.875713	0.930943	0.743108	0.768932	0.753674	0.771685	0.838008	0.809763	0.828037	0.935357
19.13	0.832467	0.817731	0.875564	0.85102	0.936598	0.881727	0.881014	0.927859	0.743558	0.764328	0.753613	0.772588	0.834653	0.810338	0.824203	0.933129
19.23	0.833559	0.816357	0.869702	0.85053	0.937479	0.875089	0.874572	0.932297	0.742229	0.763225	0.753831	0.773688	0.827683	0.80701	0.82684	0.928265
19.33	0.833487	0.81694	0.870117	0.855138	0.935979	0.876609	0.874517	0.928094	0.739778	0.764436	0.757283	0.768131	0.829902	0.806107	0.822371	0.930145
19.43	0.830209	0.811134	0.868799	0.8484	0.933121	0.878021	0.876689	0.925228	0.739023	0.757167	0.750194	0.769742	0.832508	0.807334	0.821954	0.929125
19.53	0.825801	0.815127	0.870606	0.845854	0.93497	0.871236	0.868738	0.922533	0.736155	0.762628	0.747964	0.763526	0.831229	0.806303	0.820776	0.927754
19.63	0.830181	0.809611	0.865416	0.850926	0.930913	0.868917	0.878029	0.918965	0.734731	0.754834	0.75049	0.769001	0.830933	0.803014	0.827774	0.926831
19.73	0.829739	0.811192	0.866756	0.847695	0.929876	0.868356	0.872706	0.928763	0.736845	0.756023	0.745717	0.765618	0.824687	0.804238	0.823043	0.923056
19.83	0.828156	0.811327	0.868633	0.844937	0.929158	0.870965	0.873069	0.923437	0.738471	0.758018	0.743235	0.772254	0.826191	0.803575	0.819511	0.926997
19.93	0.826998	0.81154	0.867414	0.843613	0.931571	0.865568	0.868296	0.917009	0.735088	0.759419	0.746709	0.771665	0.823698	0.802362	0.817982	0.9199
20.03	0.827017	0.812065	0.867256	0.843632	0.924987	0.871745	0.870783	0.922193	0.737091	0.752272	0.745338	0.765903	0.827686	0.803628	0.816542	0.920016
20.13	0.825234	0.807425	0.865338	0.839677	0.930225	0.869235	0.870056	0.923083	0.735925	0.753917	0.743921	0.764441	0.823819	0.801989	0.814868	0.923575
20.23	0.824278	0.810205	0.865032	0.841888	0.923125	0.869064	0.869061	0.916989	0.729652	0.754417	0.740046	0.765522	0.825817	0.795635	0.820307	0.921643
20.33	0.82443	0.811073	0.863907	0.84332	0.926043	0.866367	0.865372	0.919231	0.727388	0.754752	0.739827	0.762518	0.826743	0.796481	0.817239	0.914472
20.43	0.829496	0.80512	0.864802	0.840056	0.924786	0.864451	0.86635	0.913908	0.732053	0.750225	0.742105	0.763756	0.82482	0.793847	0.814575	0.919145
20.53	0.823839	0.80161	0.862398	0.84193	0.920474	0.865731	0.866436	0.915779	0.729784	0.750998	0.738888	0.761796	0.822971	0.800947	0.81675	0.912852
20.63	0.821459	0.801397	0.85634	0.836756	0.928379	0.864874	0.864877	0.919518	0.730746	0.747113	0.74384	0.758966	0.824715	0.79629	0.810388	0.913963
20.73	0.822744	0.796834	0.855649	0.832221	0.920889	0.858053	0.863708	0.917575	0.723654	0.745214	0.737406	0.761711	0.821852	0.795395	0.809821	0.912885
20.83	0.825566	0.799023	0.856168	0.83672	0.922265	0.863586	0.861859	0.916735	0.725597	0.748373	0.742475	0.757164	0.824825	0.794325	0.811891	0.910257
20.93	0.814486	0.800469	0.853079	0.836433	0.917719	0.858086	0.857172	0.915279	0.725741	0.745294	0.736721	0.754295	0.822117	0.795091	0.807679	0.906089
21.03	0.814544	0.799018	0.858813	0.836861	0.918609	0.859935	0.85985	0.907982	0.725487	0.744979	0.733659	0.761011	0.823894	0.796193	0.806438	0.910182
21.13	0.820249	0.799745	0.855793	0.827912	0.919756	0.858628	0.863235	0.911603	0.718837	0.742555	0.733612	0.757946	0.821495	0.792407	0.804479	0.907383
21.23	0.816689	0.798288	0.850859	0.827857	0.92229	0.856915	0.852949	0.90969	0.719832	0.745977	0.734668	0.755608	0.823551	0.794201	0.806748	0.903572
21.33	0.816838	0.796406	0.850763	0.828728	0.918017	0.857155	0.852755	0.903536	0.716944	0.739648	0.730284	0.756117	0.821594	0.793512	0.805394	0.90217
21.43	0.815688	0.79485	0.846296	0.826931	0.919167	0.856669	0.852866	0.906537	0.719268	0.74295	0.729837	0.754962	0.816161	0.792086	0.808478	0.905257
21.53	0.813751	0.800438	0.852089	0.827487	0.914444	0.856279	0.849679	0.905415	0.718666	0.741602	0.736235	0.750888	0.818068	0.791697	0.804578	0.903574
21.63	0.810553	0.79794	0.846794	0.828031	0.913242	0.855209	0.848016	0.90036	0.712997	0.739272	0.726658	0.744692	0.816526	0.791277	0.804272	0.905506
21.73	0.812574	0.79147	0.842074	0.828451	0.911926	0.853206	0.849729	0.900266	0.712351	0.736743	0.730218	0.751076	0.815138	0.785067	0.799971	0.900379
21.83	0.809197	0.795157	0.845304	0.825392	0.9078	0.848018	0.850362	0.904005	0.712804	0.741372	0.73121	0.745051	0.813279	0.781595	0.798592	0.903583
21.93	0.815177	0.797315	0.842502	0.824317	0.918609	0.852559	0.85202	0.903248	0.708932	0.738863	0.722051	0.750111	0.815296	0.786954	0.798985	0.895092
22.03	0.807588	0.790986	0.845777	0.824071	0.90696	0.849624	0.853178	0.894681	0.707967	0.736334	0.724304	0.750993	0.815852	0.782582	0.8009	0.89711
22.13	0.806599	0.791655	0.84219	0.820039	0.907463	0.851205	0.851293	0.89795	0.709546	0.735425	0.728126	0.742693	0.81327	0.783732	0.801395	0.894764
22.23	0.804835	0.787316	0.841112	0.82176	0.902168	0.850238	0.849262	0.895902	0.708031	0.73474	0.72568	0.747284	0.807428	0.781059	0.790671	0.89724
22.33	0.804617	0.788524	0.842389	0.819301	0.903256	0.847233	0.848538	0.888924	0.704955	0.737741	0.721924	0.743757	0.807044	0.778906	0.793687	0.892492
22.43	0.805427	0.786625	0.840332	0.820077	0.899194	0.844865	0.845152	0.891884	0.705762	0.734853	0.725003	0.744495	0.80268	0.782637	0.79163	0.888429
22.53	0.80829	0.785785	0.839257	0.821793	0.899727	0.842499	0.845503	0.889847	0.706323	0.731951	0.724342	0.74549	0.806698	0.775192	0.790782	0.892578
22.63	0.808635	0.78536	0.835562	0.819005	0.898334	0.843903	0.844315	0.894321	0.702871	0.727192	0.723922	0.743545	0.802923	0.776261	0.791089	0.890253
22.73	0.804672	0.787325	0.833014	0.818618	0.89905	0.83889	0.842767	0.893315	0.702653	0.726277	0.72413	0.746477	0.806513	0.777804	0.791116	0.890137
22.83	0.802268	0.78474	0.836963	0.825198	0.900822	0.840089	0.842994	0.892489	0.695669	0.724677	0.725984	0.744769	0.800892	0.774882	0.788961	0.883355
22.93	0.805278	0.782397	0.835137	0.817695	0.899246	0.842648	0.843911	0.88679	0.699508	0.720929	0.716521	0.744971	0.803404	0.773976	0.787524	0.888954
23.03	0.80156	0.779901	0.831209	0.817684	0.893415	0.84099	0.837732	0.890098	0.699472	0.723679	0.719799	0.740143	0.800955	0.771295	0.784984	0.884046
23.13	0.80156	0.782065	0.828424	0.81594	0.896046	0.842308	0.840133	0.886481	0.699447	0.720534	0.721465	0.738244	0.802884	0.769792	0.785926	0.885837
23.23	0.799197	0.785763	0.826915	0.813765	0.888957	0.839998	0.836018	0.887915	0.698458	0.721394	0.712851	0.741699	0.79668	0.769054	0.781493	0.878657
23.33	0.802039	0.786197	0.82833	0.81707	0.890507	0.841466	0.8342	0.881774	0.696658	0.722587	0.716615	0.734143	0.797846	0.767979	0.782576	0.8811
23.43	0.794894	0.781344	0.827288	0.818662	0.8892	0.83735	0.834368	0.883264	0.690672	0.721269	0.714938	0.735301	0.79443	0.769465	0.776839	0.879784
23.53	0.796094	0.777276	0.824159	0.818342	0.891558	0.834432	0.837154	0.881879	0.694243	0.719771	0.711464	0.738553	0.797506	0.764809	0.776184	0.87521
23.63	0.797155	0.778215	0.830994	0.814356	0.889225	0.830687	0.83357	0.880591	0.690349	0.715637	0.711513	0.738816	0.795591	0.765157	0.779694	0.875849
23.73	0.792642	0.774874	0.826312	0.814566	0.881981	0.835875	0.829897	0.874381	0.690379	0.713149	0.714476	0.742177	0.797249	0.764358	0.778348	0.873917
23.83	0.796696	0.77614	0.829214	0.814564	0.885182	0.832	0.828761	0.876332	0.693505	0.714382	0.710789	0.734621	0.795138	0.766713	0.777287	0.87094
23.93	0.793452	0.777643	0.828089	0.806538	0.88558	0.829739	0.833028	0.876028	0.688207	0.714108	0.706503	0.736577	0.791368	0.765447	0.775385	0.87382
24.03	0.787888	0.775228	0.822946	0.813544	0.88236	0.836303	0.828706	0.878126	0.685145	0.715891	0.70941	0.732664	0.789917	0.76063	0.776242	0.871134
24.13	0.785503	0.775255	0.821998	0.803011	0.88763	0.826953	0.826635	0.872082	0.688119	0.711776	0.706793	0.731702	0.787073	0.763391	0.771182	0.868655
24.23	0.787374	0.772829	0.823001	0.804675	0.886144	0.82972	0.826881	0.870869	0.684194	0.712116	0.708122	0.729334	0.784682	0.758261	0.77051	0.865526
24.33	0.789287	0.770963	0.819411	0.807292	0.886561	0.828051	0.829529	0.869354	0.683639	0.708023	0.703316	0.725534	0.787684	0.756465	0.771074	0.868309
24.43	0.786777	0.775659	0.822943	0.803929	0.882457	0.826589	0.824546	0.870283	0.686651	0.708821	0.701155	0.72877	0.785934	0.755525	0.765704	0.868694
24.53	0.791368	0.774871	0.821401	0.807591	0.885232	0.824342	0.831066	0.865568	0.680394	0.707556	0.703515	0.729278	0.786954	0.75361	0.771519	0.865723
24.63	0.781087	0.767821	0.819704	0.801618	0.880188	0.822794	0.820857	0.868425	0.677398	0.708078	0.699917	0.730309	0.787756	0.755716	0.768808	0.861444
24.73	0.785053	0.768045	0.821263	0.800775	0.881197	0.822092	0.823081	0.866577	0.677476	0.704289	0.69822	0.725611	0.781966	0.753124	0.766215	0.857849
24.83	0.781319	0.763402	0.818358	0.803321	0.878513	0.821755	0.821014	0.86522	0.678694	0.705607	0.700204	0.722643	0.782704	0.755362	0.769792	0.864125
24.93	0.780277	0.768857	0.820019	0.800977	0.877648	0.822722	0.81762	0.862633	0.67472	0.706323	0.700226	0.725442	0.779677	0.750321	0.764817	0.856779
25.03	0.778868	0.765723	0.816097	0.801317	0.885082	0.820072	0.817935	0.862674	0.674482	0.700365	0.703114	0.719744	0.780678	0.751286	0.761807	0.857011
25.13	0.781208	0.765574	0.81259	0.797349	0.881459	0.820964	0.814102	0.864888	0.670978	0.700793	0.700649	0.717215	0.783212	0.749307	0.760705	0.858507
25.23	0.777444	0.761951	0.817659	0.797119	0.877452	0.818474	0.815796	0.863981	0.672006	0.702606	0.695094	0.715543	0.779268	0.748436	0.760658	0.854817
25.33	0.778351	0.763283	0.816216	0.796373	0.878245	0.817858	0.806773	0.860419	0.67241	0.696943	0.693198	0.719733	0.774717	0.748633	0.75846	0.860447
25.43	0.776814	0.764546	0.815437	0.791445	0.875708	0.816949	0.81487	0.85928	0.667557	0.700912	0.696169	0.713636	0.776314	0.746715	0.760868	0.850906
25.53	0.776002	0.760207	0.810413	0.790915	0.87154	0.817466	0.811637	0.855179	0.670602	0.696084	0.691899	0.715007	0.77368	0.745289	0.753718	0.851805
25.63	0.777359	0.762252	0.816067	0.792191	0.870811	0.817233	0.81128	0.859706	0.666368	0.697692	0.691109	0.710748	0.775891	0.739543	0.758198	0.848057
25.73	0.777314	0.760729	0.814105	0.792424	0.876484	0.813461	0.807972	0.858567	0.670757	0.693218	0.68947	0.710811	0.773285	0.743387	0.756658	0.843091
25.83	0.775161	0.758358	0.809733	0.791202	0.872958	0.81374	0.802644	0.855508	0.668397	0.694014	0.687936	0.709764	0.77365	0.741787	0.754569	0.848165
25.93	0.775195	0.759696	0.808268	0.78489	0.872452	0.811236	0.803221	0.852542	0.664685	0.694083	0.682909	0.713219	0.772365	0.746049	0.751673	0.845995
26.03	0.772682	0.755677	0.806184	0.789558	0.869017	0.816037	0.806831	0.849997	0.666321	0.692458	0.687864	0.711353	0.772517	0.740759	0.753978	0.846636
26.13	0.773478	0.756283	0.803501	0.782369	0.87455	0.808945	0.800292	0.849281	0.665094	0.69644	0.682868	0.707652	0.770822	0.738758	0.751747	0.842402
26.23	0.772663	0.75557	0.808906	0.786415	0.870075	0.80994	0.799087	0.846634	0.659932	0.692093	0.685186	0.708178	0.767948	0.736218	0.756388	0.842751
26.33	0.769747	0.754014	0.804484	0.787319	0.867876	0.807129	0.800245	0.849486	0.665534	0.690888	0.683205	0.70836	0.771281	0.737708	0.746659	0.841875
26.43	0.769944	0.750915	0.807091	0.787747	0.865126	0.80271	0.797959	0.847012	0.655385	0.689	0.682318	0.704833	0.767614	0.737879	0.751897	0.840283
26.53	0.769653	0.751048	0.794972	0.781325	0.86499	0.808171	0.796937	0.850942	0.66272	0.688105	0.681624	0.707398	0.768791	0.732943	0.749473	0.837889
26.63	0.767887	0.754635	0.798142	0.777171	0.867967	0.806165	0.796376	0.846272	0.657607	0.689641	0.676646	0.704792	0.7681	0.733327	0.746914	0.839747
26.73	0.764549	0.753035	0.800319	0.777649	0.859482	0.80792	0.796381	0.843809	0.657198	0.683517	0.682633	0.707418	0.763803	0.735397	0.74533	0.83897
26.83	0.762769	0.747063	0.797125	0.77936	0.864482	0.806535	0.799866	0.849049	0.657552	0.680728	0.679305	0.70288	0.765173	0.735243	0.746944	0.836643
26.93	0.76443	0.751184	0.796951	0.777701	0.860054	0.799488	0.79422	0.844674	0.659605	0.678971	0.675698	0.701183	0.761465	0.731547	0.74591	0.830615
27.03	0.762747	0.746068	0.794729	0.77389	0.864089	0.802497	0.792288	0.841488	0.65858	0.684885	0.676511	0.698499	0.762935	0.728997	0.739167	0.832655
27.13	0.761224	0.744661	0.792628	0.77635	0.859642	0.802815	0.789027	0.845805	0.658027	0.682069	0.675867	0.699201	0.763515	0.729068	0.739474	0.831699
27.23	0.766287	0.74719	0.795842	0.77543	0.853855	0.800422	0.79176	0.844785	0.653296	0.680546	0.670804	0.69728	0.759723	0.730486	0.739206	0.829372
27.33	0.767337	0.745595	0.791078	0.771933	0.858106	0.799302	0.785702	0.835783	0.649673	0.679999	0.67333	0.69377	0.757836	0.724453	0.739874	0.826448
27.43	0.761523	0.742804	0.790503	0.77499	0.854355	0.798352	0.785318	0.839426	0.653133	0.680856	0.670865	0.697429	0.757222	0.723477	0.740319	0.827777
27.53	0.759281	0.746167	0.78924	0.774518	0.853869	0.796749	0.785898	0.837782	0.652251	0.678186	0.669458	0.698046	0.755934	0.720556	0.737332	0.821832
27.63	0.758051	0.747265	0.787808	0.768974	0.853449	0.796967	0.786261	0.833608	0.652243	0.67941	0.669549	0.695136	0.756697	0.726205	0.733977	0.820735
27.73	0.75788	0.740958	0.791371	0.771848	0.859233	0.789295	0.789928	0.832417	0.654252	0.679283	0.665365	0.695564	0.754575	0.720487	0.73307	0.823289
27.83	0.755194	0.745112	0.789091	0.773412	0.855588	0.790185	0.785586	0.833078	0.648694	0.675795	0.665462	0.689746	0.753881	0.722408	0.732517	0.826776
27.93	0.758408	0.739291	0.78812	0.767832	0.850865	0.788629	0.786258	0.835969	0.64954	0.67399	0.664326	0.691512	0.753638	0.717834	0.731133	0.818914
28.03	0.754262	0.737581	0.78518	0.76849	0.852576	0.790539	0.785058	0.830016	0.644947	0.673772	0.666382	0.690241	0.751706	0.720075	0.731744	0.821465
28.13	0.755318	0.742945	0.784074	0.767929	0.850166	0.793056	0.783643	0.830286	0.646121	0.675845	0.66395	0.689332	0.754185	0.718414	0.726791	0.81646
28.23	0.754005	0.740419	0.78599	0.772348	0.846871	0.786824	0.780001	0.833105	0.645394	0.67412	0.659534	0.686137	0.751698	0.718077	0.726548	0.816584
28.33	0.757081	0.735801	0.783961	0.768578	0.845984	0.785009	0.782096	0.829656	0.646235	0.669939	0.659749	0.687737	0.748356	0.719122	0.729198	0.819232
28.43	0.753682	0.73598	0.782919	0.764275	0.840203	0.787344	0.779462	0.836687	0.645953	0.668814	0.658771	0.687392	0.749056	0.713017	0.727015	0.813444
28.53	0.753301	0.73443	0.783317	0.76448	0.842662	0.785138	0.782375	0.828291	0.642766	0.670116	0.658749	0.683147	0.746925	0.714092	0.726733	0.815854
28.63	0.754793	0.738357	0.784254	0.759663	0.843198	0.783527	0.779791	0.825035	0.641815	0.664025	0.655136	0.686571	0.74326	0.715062	0.722831	0.812972
28.73	0.748359	0.734698	0.781822	0.759124	0.840744	0.788723	0.773138	0.823562	0.63817	0.671829	0.659802	0.687546	0.745816	0.712616	0.725539	0.811662
28.83	0.745043	0.732697	0.781689	0.759074	0.839998	0.784296	0.771641	0.824217	0.643393	0.666722	0.65591	0.680949	0.744023	0.711582	0.719404	0.81023
28.93	0.749874	0.733255	0.780341	0.760348	0.840133	0.785434	0.775977	0.820077	0.641937	0.663903	0.653448	0.679009	0.746775	0.713014	0.717773	0.808558
29.03	0.753165	0.734521	0.778611	0.758814	0.836267	0.784843	0.773003	0.818483	0.641124	0.661501	0.655576	0.681383	0.742127	0.712674	0.718329	0.813577
29.13	0.749926	0.734482	0.771135	0.756498	0.834869	0.785921	0.777693	0.823582	0.639715	0.661606	0.654855	0.676973	0.743683	0.707091	0.71874	0.805604
29.23	0.749553	0.731185	0.778519	0.753397	0.836579	0.780996	0.7758	0.818784	0.637454	0.662013	0.657184	0.682099	0.742273	0.707849	0.717911	0.80598
29.33	0.742848	0.731492	0.772005	0.760688	0.832804	0.780628	0.772152	0.816178	0.637758	0.658481	0.651013	0.680684	0.735171	0.708371	0.713923	0.802967
29.43	0.745731	0.733673	0.774736	0.755094	0.835477	0.780155	0.771806	0.818554	0.635669	0.656875	0.651104	0.677757	0.735922	0.704322	0.716681	0.799606
29.53	0.746073	0.72442	0.77247	0.757971	0.833597	0.775593	0.771524	0.813055	0.636095	0.655819	0.64802	0.679667	0.733059	0.701829	0.710927	0.801997
29.63	0.743752	0.730384	0.771779	0.753652	0.827882	0.771812	0.770281	0.813295	0.632891	0.654725	0.648376	0.678899	0.728585	0.704521	0.714835	0.801975
29.73	0.742508	0.726595	0.77287	0.754207	0.826583	0.774172	0.761658	0.811076	0.63434	0.656013	0.649648	0.675035	0.728756	0.704742	0.710013	0.79511
29.83	0.746554	0.728383	0.768551	0.752035	0.827763	0.774473	0.769413	0.808544	0.628116	0.656914	0.644681	0.676254	0.728325	0.700533	0.708399	0.799283
29.93	0.736284	0.725885	0.773929	0.75002	0.823015	0.774904	0.762506	0.807746	0.627779	0.650474	0.644513	0.67302	0.728734	0.700254	0.704961	0.796417
30.03	0.741267	0.72251	0.765682	0.749887	0.827503	0.772254	0.763908	0.812831	0.626264	0.651792	0.639906	0.674198	0.722212	0.698792	0.708283	0.798979
30.13	0.739203	0.727034	0.768996	0.747933	0.824789	0.771102	0.764112	0.809476	0.626864	0.651723	0.63945	0.669859	0.723461	0.69725	0.704529	0.794552
30.23	0.740626	0.72259	0.766652	0.745418	0.824759	0.769554	0.765091	0.806776	0.62737	0.649902	0.641177	0.670669	0.720133	0.697877	0.70723	0.79249
30.33	0.738048	0.722875	0.765978	0.742229	0.822858	0.766492	0.763905	0.804308	0.627621	0.650344	0.639707	0.669483	0.721523	0.696186	0.702128	0.79081
30.43	0.739184	0.717729	0.767896	0.746176	0.827138	0.771978	0.76223	0.800447	0.628472	0.643076	0.637239	0.668065	0.717734	0.698756	0.703678	0.792766
30.53	0.733628	0.717986	0.764565	0.745178	0.825157	0.766489	0.759057	0.801563	0.626712	0.642421	0.639024	0.668822	0.715971	0.697966	0.70144	0.79089
30.63	0.735129	0.716811	0.765527	0.744089	0.823725	0.765541	0.763195	0.802022	0.626673	0.641404	0.637349	0.668947	0.719476	0.693115	0.702103	0.788789
30.73	0.738534	0.719827	0.761208	0.744468	0.821263	0.765113	0.759972	0.799255	0.62373	0.641536	0.63246	0.663229	0.715098	0.694359	0.701838	0.786368
30.83	0.734131	0.717917	0.762902	0.740308	0.823778	0.765524	0.755724	0.799349	0.621983	0.645718	0.633809	0.663317	0.711618	0.6902	0.699665	0.787316
30.93	0.73506	0.718049	0.761724	0.740778	0.820536	0.76239	0.753522	0.797586	0.62098	0.643136	0.635224	0.663184	0.709957	0.694201	0.699135	0.784967
31.03	0.736248	0.716847	0.760445	0.742575	0.818264	0.76108	0.756863	0.791882	0.621005	0.641511	0.630879	0.660263	0.709114	0.691195	0.696128	0.778196
31.13	0.737161	0.713227	0.759892	0.742262	0.820016	0.761451	0.756471	0.794972	0.621035	0.640138	0.632988	0.659716	0.706536	0.686822	0.695854	0.781648
31.23	0.73181	0.712577	0.750744	0.736179	0.82239	0.759972	0.753292	0.796279	0.618678	0.638734	0.629241	0.660426	0.706566	0.688865	0.696495	0.783201
31.33	0.735019	0.709311	0.756117	0.734988	0.81764	0.761114	0.755119	0.794079	0.62151	0.635044	0.632082	0.656259	0.706613	0.689337	0.693464	0.775863
31.43	0.731141	0.713299	0.760204	0.738437	0.817714	0.760301	0.751977	0.791984	0.615975	0.636247	0.634472	0.657745	0.70522	0.684515	0.691576	0.777657
31.53	0.731155	0.713097	0.759748	0.737708	0.818256	0.758013	0.750849	0.791495	0.615411	0.633867	0.625493	0.655678	0.706815	0.67996	0.692173	0.772652
31.63	0.732949	0.713625	0.753535	0.73514	0.816454	0.759953	0.74481	0.793443	0.615751	0.630249	0.629243	0.656488	0.707625	0.682163	0.690321	0.774838
31.73	0.732131	0.711649	0.752916	0.734148	0.817001	0.753997	0.747737	0.790077	0.615411	0.633955	0.628765	0.654611	0.708556	0.683564	0.68944	0.773545
31.83	0.73228	0.707738	0.753497	0.734098	0.81736	0.751725	0.745007	0.789149	0.611091	0.633046	0.62787	0.651726	0.708349	0.674858	0.686665	0.76789
31.93	0.727891	0.709778	0.747613	0.730489	0.813505	0.749362	0.74638	0.786501	0.61328	0.632496	0.624434	0.655045	0.702797	0.681947	0.68415	0.773688
32.03	0.726178	0.709546	0.747063	0.73257	0.814163	0.747331	0.746455	0.786272	0.611252	0.628152	0.627361	0.649546	0.707669	0.677572	0.683727	0.767796
32.13	0.728386	0.707724	0.747179	0.730785	0.809954	0.752701	0.745852	0.786374	0.610243	0.630738	0.627148	0.651292	0.701934	0.677296	0.688105	0.769811
32.23	0.724389	0.70461	0.751173	0.730403	0.808998	0.749456	0.746745	0.784036	0.612164	0.626507	0.623326	0.646848	0.706461	0.676481	0.67907	0.761838
32.33	0.727319	0.7082	0.752165	0.726178	0.810636	0.750609	0.742652	0.784807	0.607863	0.627991	0.625507	0.647376	0.703385	0.677451	0.679551	0.768703
32.43	0.723342	0.701868	0.750324	0.730677	0.807898	0.748362	0.743213	0.783585	0.607125	0.625518	0.62224	0.650676	0.699549	0.673435	0.681917	0.766743
32.53	0.72552	0.703488	0.743749	0.726401	0.810833	0.746181	0.741469	0.785829	0.60888	0.624144	0.620698	0.652356	0.699798	0.669613	0.679078	0.769123
32.63	0.724265	0.703874	0.746731	0.72846	0.807248	0.748751	0.738249	0.783182	0.60702	0.626217	0.620493	0.643219	0.701688	0.669046	0.680112	0.761785
32.73	0.725277	0.706798	0.748832	0.727775	0.806554	0.746134	0.741809	0.78033	0.603867	0.62418	0.618766	0.642553	0.698734	0.66699	0.676318	0.764347
32.83	0.725318	0.702061	0.739991	0.723961	0.802284	0.740941	0.737061	0.777704	0.607827	0.62127	0.619452	0.646378	0.69502	0.669837	0.676154	0.764781
32.93	0.718279	0.702164	0.742091	0.722402	0.804589	0.742763	0.741795	0.778992	0.603472	0.616215	0.619943	0.642111	0.695663	0.670809	0.672357	0.757148
33.03	0.722886	0.700077	0.746715	0.720775	0.800306	0.739043	0.73404	0.777933	0.604773	0.618153	0.619946	0.645403	0.696915	0.667852	0.673634	0.757355
33.13	0.717383	0.700868	0.737379	0.724962	0.796425	0.740248	0.733659	0.776596	0.600432	0.619753	0.618996	0.644344	0.689838	0.66592	0.675184	0.758411
33.23	0.721443	0.699353	0.739786	0.721703	0.800764	0.740129	0.73527	0.777002	0.604384	0.615781	0.616298	0.639082	0.693516	0.664536	0.672399	0.757949
33.33	0.720429	0.69924	0.741712	0.72033	0.801447	0.737603	0.730224	0.773255	0.599329	0.618117	0.617083	0.642426	0.690913	0.667062	0.670334	0.754787
33.43	0.720656	0.6989	0.738495	0.720531	0.802975	0.740529	0.734026	0.772453	0.600479	0.613838	0.616829	0.641826	0.689774	0.665744	0.667941	0.75523
33.53	0.715775	0.699397	0.740336	0.716145	0.800267	0.7414	0.735124	0.772085	0.599019	0.61296	0.612866	0.641218	0.688348	0.663889	0.670779	0.755943
33.63	0.715454	0.693306	0.734947	0.717795	0.79975	0.734759	0.732705	0.771892	0.597527	0.61658	0.615386	0.638701	0.689849	0.66091	0.668093	0.752748
33.73	0.715457	0.696377	0.736403	0.718279	0.796481	0.736566	0.73037	0.772237	0.596319	0.612747	0.613001	0.634668	0.684084	0.658768	0.665663	0.749188
33.83	0.717334	0.693627	0.733673	0.715211	0.796389	0.734361	0.724337	0.76595	0.599846	0.611113	0.611359	0.635033	0.683125	0.662734	0.66589	0.746579
33.93	0.716494	0.690534	0.730658	0.71444	0.794051	0.733982	0.725586	0.766464	0.597599	0.614176	0.611876	0.639441	0.689412	0.661559	0.664829	0.74475
34.03	0.714205	0.69157	0.733192	0.710728	0.800214	0.732313	0.727747	0.764629	0.594014	0.61158	0.610906	0.636783	0.686576	0.659545	0.662922	0.747339
34.13	0.710659	0.691452	0.732752	0.713887	0.793474	0.731354	0.722728	0.765149	0.595106	0.61074	0.609502	0.630498	0.683572	0.658282	0.663049	0.74764
34.23	0.710712	0.691919	0.727145	0.711768	0.796097	0.732799	0.72783	0.772928	0.592381	0.611039	0.605069	0.630722	0.680831	0.654473	0.661054	0.745217
34.33	0.710723	0.691189	0.729845	0.710693	0.789975	0.728466	0.725934	0.763302	0.594874	0.609007	0.606727	0.628259	0.680181	0.652389	0.66259	0.743158
34.43	0.706058	0.6873	0.728482	0.712033	0.78563	0.727745	0.722745	0.764974	0.592326	0.608333	0.604718	0.630133	0.675649	0.653556	0.654125	0.739438
34.53	0.706903	0.685869	0.724787	0.708595	0.790633	0.730892	0.718812	0.763015	0.592403	0.607858	0.607197	0.627253	0.676757	0.655543	0.659207	0.743144
34.63	0.70702	0.688461	0.723743	0.710264	0.790638	0.727266	0.718265	0.758646	0.588744	0.608391	0.602853	0.62798	0.679009	0.648653	0.658762	0.740408
34.73	0.709349	0.687419	0.71782	0.708755	0.786175	0.726136	0.720896	0.756827	0.587608	0.604738	0.598469	0.62546	0.676359	0.64765	0.651383	0.736859
34.83	0.707838	0.683431	0.723082	0.707152	0.784752	0.725111	0.715308	0.757944	0.588318	0.601457	0.602317	0.624291	0.678487	0.64925	0.654263	0.731824
34.93	0.704938	0.687057	0.72379	0.70907	0.78699	0.724301	0.712373	0.75733	0.587558	0.608328	0.598738	0.623813	0.674375	0.648537	0.65431	0.739225
35.03	0.708313	0.68219	0.715631	0.706787	0.787739	0.721626	0.717278	0.753839	0.583852	0.604928	0.594252	0.623033	0.675162	0.646467	0.653788	0.734554
35.13	0.702692	0.681732	0.723696	0.703778	0.784097	0.722411	0.716471	0.75277	0.585336	0.600918	0.59845	0.62334	0.671456	0.641094	0.65116	0.730262
35.23	0.706926	0.683666	0.719246	0.701633	0.78122	0.723151	0.71667	0.754599	0.583921	0.598008	0.593315	0.61737	0.670464	0.646735	0.649175	0.729585
35.33	0.703322	0.679816	0.71876	0.702119	0.780009	0.723933	0.713078	0.750962	0.584493	0.599625	0.594147	0.621215	0.674248	0.643667	0.649031	0.732951
35.43	0.702487	0.684147	0.720669	0.703294	0.77745	0.717444	0.714915	0.751659	0.581442	0.602212	0.594796	0.620178	0.671481	0.640105	0.648095	0.732465
35.53	0.698333	0.678716	0.716167	0.701219	0.777746	0.718884	0.717508	0.754646	0.583288	0.593777	0.588935	0.622364	0.668057	0.636039	0.647616	0.724776
35.63	0.701277	0.678653	0.716856	0.701163	0.77698	0.720564	0.712445	0.753754	0.580088	0.598588	0.593498	0.620999	0.667783	0.639491	0.645146	0.725887
35.73	0.701992	0.67999	0.71496	0.699837	0.773011	0.717842	0.71006	0.751626	0.578825	0.596737	0.591027	0.617221	0.669491	0.639218	0.64254	0.724519

## Sheet: primary data n=2
	mitochondria								mitoplasts
time (min)	0.1	0.16	0.25	0.4	0.63	1	1.58	2.5	0.1	0.16	0.25	0.4	0.63	1	1.58	2.5	PCP (µM)
0
0.35	0.077712	0.078511	0.093176	0.097961	0.091343	0.088234	0.0934	0.108771	0.023409	0.028266	0.02816	0.04168	0.036698	0.038588	0.047169	0.050836
0.45	0.085868	0.088751	0.102066	0.111903	0.108669	0.107064	0.111867	0.130603	0.033269	0.039175	0.040613	0.062297	0.058851	0.063692	0.075079	0.080912
0.55	0.093249	0.094725	0.11408	0.12896	0.130905	0.129173	0.137725	0.156126	0.046627	0.053066	0.055486	0.087586	0.085267	0.090388	0.108971	0.11416
0.65	0.102606	0.107762	0.127099	0.14969	0.155245	0.154172	0.163997	0.184783	0.058194	0.069152	0.073227	0.113571	0.112645	0.121431	0.144196	0.151205
0.75	0.113437	0.122093	0.143214	0.172701	0.178354	0.179929	0.194092	0.213747	0.075859	0.086231	0.091802	0.140416	0.144689	0.152956	0.179318	0.187232
0.85	0.124061	0.136768	0.160297	0.198219	0.2058	0.207198	0.222047	0.246043	0.089634	0.103708	0.109056	0.169832	0.173532	0.18698	0.215573	0.226749
0.95	0.138592	0.155388	0.178701	0.22607	0.233258	0.238422	0.253278	0.278092	0.107093	0.121282	0.12987	0.198396	0.205218	0.217532	0.251727	0.260303
1.05	0.148907	0.170139	0.194962	0.249741	0.263485	0.264366	0.284358	0.312516	0.122904	0.142523	0.150793	0.226073	0.234307	0.251006	0.285767	0.297056
1.15	0.160693	0.185735	0.213844	0.275723	0.288122	0.290717	0.315153	0.342696	0.142139	0.162004	0.171378	0.251737	0.264091	0.282492	0.318111	0.330439
1.25	0.176415	0.203682	0.231776	0.305535	0.316534	0.318212	0.343085	0.370818	0.159524	0.180207	0.191255	0.279016	0.29317	0.313529	0.348474	0.362148
1.35	0.188441	0.220289	0.250485	0.326498	0.339927	0.343726	0.373453	0.400437	0.176584	0.202616	0.21156	0.305022	0.318952	0.339019	0.377037	0.393694
1.45	0.204379	0.238551	0.270744	0.352438	0.365483	0.36701	0.398405	0.427364	0.19507	0.218402	0.229954	0.332696	0.347706	0.368278	0.40594	0.419658
1.55	0.214763	0.256603	0.288044	0.374188	0.385861	0.393414	0.423766	0.453759	0.211258	0.239626	0.248954	0.353885	0.373846	0.391738	0.432471	0.446864
1.65	0.231582	0.272488	0.303702	0.400644	0.412336	0.415065	0.451462	0.478825	0.231269	0.256266	0.268915	0.374051	0.394837	0.416587	0.456976	0.472943
1.75	0.242572	0.287893	0.323293	0.420836	0.431856	0.435629	0.473751	0.501548	0.246397	0.275252	0.286689	0.394847	0.414726	0.441941	0.478512	0.497832
1.85	0.260164	0.305736	0.33563	0.44318	0.451525	0.460363	0.497264	0.523899	0.263054	0.295529	0.308335	0.414563	0.443029	0.46045	0.500151	0.520595
1.95	0.270937	0.321082	0.355983	0.467692	0.470577	0.477998	0.518785	0.546234	0.280201	0.310904	0.323663	0.434734	0.45983	0.482332	0.523327	0.545067
2.05	0.284144	0.335154	0.372812	0.481271	0.490015	0.498944	0.537523	0.567345	0.295974	0.326882	0.338567	0.450505	0.482358	0.503297	0.544412	0.559711
2.15	0.297259	0.351811	0.386445	0.502618	0.511107	0.510028	0.554583	0.586646	0.312879	0.343747	0.356006	0.469427	0.495741	0.519756	0.560581	0.585135
2.25	0.311573	0.366602	0.401679	0.516572	0.52269	0.529906	0.575214	0.602968	0.32585	0.3631	0.372607	0.485511	0.515017	0.538466	0.581897	0.600725
2.35	0.324297	0.381107	0.413427	0.533873	0.543276	0.545578	0.589842	0.621386	0.341694	0.377436	0.387954	0.498598	0.531766	0.555936	0.597631	0.616251
2.45	0.336945	0.393775	0.430386	0.555971	0.554524	0.562111	0.607319	0.638001	0.356899	0.390699	0.402421	0.518017	0.545955	0.570562	0.61347	0.633118
2.55	0.349811	0.406574	0.443018	0.567147	0.570778	0.577182	0.62596	0.656951	0.371695	0.406732	0.416526	0.530929	0.563642	0.583226	0.626043	0.654434
2.65	0.35953	0.419545	0.452713	0.577314	0.582135	0.587565	0.640678	0.670686	0.386353	0.418824	0.429017	0.545029	0.575056	0.601507	0.642523	0.663851
2.75	0.37115	0.433935	0.467226	0.595333	0.597296	0.600796	0.653317	0.687241	0.397286	0.433834	0.443263	0.555064	0.587714	0.61598	0.660533	0.679639
2.85	0.383259	0.443454	0.478055	0.607611	0.612638	0.614014	0.664707	0.70133	0.409036	0.446171	0.453015	0.570927	0.601029	0.630902	0.667509	0.693437
2.95	0.397189	0.457825	0.489923	0.618645	0.623377	0.626142	0.676054	0.710101	0.423938	0.461998	0.468142	0.586045	0.618322	0.641276	0.684069	0.705789
3.05	0.406996	0.469061	0.505194	0.634056	0.635837	0.639481	0.691856	0.72394	0.435985	0.470534	0.478736	0.592399	0.630471	0.651434	0.693168	0.720369
3.15	0.414902	0.480392	0.514805	0.643923	0.645825	0.645017	0.703052	0.736496	0.447394	0.482773	0.488308	0.603749	0.639723	0.667959	0.705779	0.728007
3.25	0.427657	0.49121	0.525037	0.65816	0.655419	0.658115	0.71349	0.748605	0.459722	0.491874	0.499359	0.617144	0.647142	0.676507	0.715861	0.741587
3.35	0.439278	0.497231	0.535876	0.669448	0.669201	0.668433	0.724142	0.758168	0.470379	0.508032	0.51262	0.622468	0.663081	0.683586	0.723942	0.757237
3.45	0.451106	0.510626	0.541284	0.675107	0.671668	0.678936	0.7343	0.771705	0.484427	0.515724	0.520871	0.635335	0.673059	0.698351	0.737889	0.766075
3.55	0.458433	0.519848	0.552109	0.685375	0.685978	0.691931	0.744926	0.78354	0.493955	0.530927	0.529645	0.646169	0.682085	0.710033	0.74502	0.77697
3.65	0.468576	0.530406	0.563925	0.697363	0.694208	0.698421	0.753728	0.788822	0.50382	0.53437	0.536083	0.654193	0.688401	0.717513	0.754921	0.782199
3.75	0.477835	0.538193	0.569433	0.707483	0.705819	0.705652	0.758894	0.801934	0.513978	0.548868	0.547386	0.663177	0.701542	0.727291	0.764699	0.793387
3.85	0.485393	0.542411	0.582124	0.715196	0.713582	0.71686	0.772287	0.809735	0.521568	0.555837	0.558385	0.669425	0.706507	0.734443	0.770501	0.803895
3.95	0.495873	0.553575	0.584226	0.720921	0.719292	0.722283	0.781858	0.821992	0.530976	0.567486	0.56701	0.677091	0.713332	0.742939	0.781688	0.813701
4.05	0.503495	0.562346	0.600025	0.738195	0.729436	0.729744	0.785654	0.823394	0.5426	0.57462	0.574295	0.687215	0.724213	0.747601	0.789248	0.821549
4.15	0.513266	0.571509	0.60644	0.743104	0.73581	0.736557	0.795289	0.838084	0.54736	0.58284	0.583026	0.695403	0.731267	0.758552	0.799054	0.831977
4.25	0.522009	0.580036	0.610185	0.748148	0.747073	0.742708	0.80472	0.840497	0.561069	0.591442	0.591654	0.69837	0.737493	0.770251	0.801786	0.83626
4.35	0.529468	0.584631	0.618563	0.755899	0.751009	0.753552	0.810145	0.849714	0.568405	0.59711	0.59703	0.708595	0.744999	0.776338	0.80866	0.839099
4.45	0.537137	0.597371	0.626415	0.765022	0.754412	0.757188	0.820609	0.858924	0.574537	0.607218	0.604804	0.715955	0.751598	0.778914	0.813675	0.850386
4.55	0.54157	0.60051	0.632437	0.768337	0.759259	0.75657	0.822141	0.864219	0.58201	0.616541	0.613255	0.719365	0.757817	0.78984	0.824283	0.856372
4.65	0.55061	0.608483	0.636382	0.779126	0.771205	0.766238	0.823529	0.877169	0.591925	0.623057	0.619244	0.729195	0.763871	0.793495	0.827922	0.864045
4.75	0.558498	0.6161	0.645759	0.783644	0.774792	0.77492	0.830337	0.87494	0.596075	0.631004	0.626684	0.732476	0.772127	0.798249	0.835932	0.868867
4.85	0.569763	0.618916	0.654778	0.790627	0.781601	0.779713	0.841942	0.881996	0.606068	0.639676	0.628803	0.738879	0.773129	0.807708	0.835244	0.875805
4.95	0.572758	0.626262	0.660248	0.793476	0.784295	0.789694	0.844166	0.892002	0.615473	0.646742	0.636888	0.74425	0.782284	0.808566	0.849005	0.881741
5.05	0.578558	0.638015	0.66222	0.800631	0.793354	0.79172	0.848451	0.895797	0.62067	0.654384	0.642064	0.748899	0.786896	0.816508	0.851599	0.88673
5.15	0.584329	0.638696	0.670104	0.803853	0.798583	0.794732	0.853954	0.902355	0.627978	0.659607	0.648778	0.753141	0.791018	0.825101	0.85693	0.894057
5.25	0.593073	0.645976	0.674511	0.812516	0.801569	0.803044	0.86314	0.903105	0.63452	0.666427	0.655796	0.756519	0.798609	0.8252	0.861047	0.893053
5.35	0.5978	0.64879	0.680299	0.817748	0.811434	0.804739	0.861643	0.909093	0.638411	0.674918	0.660896	0.764213	0.798557	0.828869	0.869239	0.898771
5.45	0.60155	0.653152	0.685618	0.820901	0.813515	0.804376	0.870521	0.915911	0.652351	0.677777	0.668098	0.769787	0.809556	0.836594	0.870073	0.905516
5.55	0.612909	0.660785	0.695499	0.822336	0.813444	0.810897	0.873705	0.92037	0.651778	0.687995	0.673219	0.772801	0.811658	0.839879	0.8737	0.911186
5.65	0.615042	0.668221	0.697915	0.831428	0.8222	0.816694	0.870434	0.923108	0.661132	0.693824	0.677798	0.77537	0.814672	0.850284	0.876307	0.91502
5.75	0.622663	0.672276	0.702819	0.834398	0.819676	0.82162	0.879069	0.928995	0.664155	0.696265	0.681508	0.783102	0.819718	0.84846	0.882368	0.92139
5.85	0.628388	0.676865	0.707749	0.838428	0.82786	0.821601	0.88518	0.930489	0.671393	0.699864	0.684644	0.782364	0.822836	0.852115	0.88558	0.917184
5.95	0.634025	0.681571	0.710563	0.840627	0.829743	0.826057	0.887631	0.933669	0.677301	0.705261	0.689721	0.788725	0.830083	0.858688	0.886853	0.922371
6.05	0.63949	0.683466	0.713186	0.846422	0.83761	0.832142	0.889488	0.939285	0.683308	0.711984	0.693044	0.790615	0.835675	0.8624	0.891076	0.928795
6.15	0.645825	0.688427	0.721189	0.84863	0.839828	0.836491	0.890478	0.943814	0.683492	0.7176	0.697538	0.791638	0.834608	0.866472	0.893605	0.929224
6.25	0.649303	0.695473	0.722898	0.853739	0.842109	0.837405	0.898422	0.945905	0.690359	0.724833	0.702011	0.801765	0.833047	0.865487	0.899841	0.933768
6.35	0.654255	0.7005	0.72738	0.860647	0.842385	0.841923	0.89878	0.948674	0.690885	0.726862	0.706173	0.799802	0.842971	0.870959	0.899478	0.938726
6.45	0.653823	0.702171	0.734938	0.858354	0.846542	0.843773	0.906456	0.951245	0.699022	0.731804	0.708082	0.808052	0.844374	0.87663	0.901787	0.938721
6.55	0.660286	0.708652	0.738773	0.862779	0.847147	0.849905	0.907295	0.952734	0.703081	0.739487	0.714023	0.802875	0.846514	0.878395	0.909569	0.941919
6.65	0.669675	0.711025	0.746137	0.868443	0.850897	0.846054	0.909435	0.955435	0.708263	0.743291	0.719224	0.806591	0.852547	0.884411	0.90947	0.947813
6.75	0.674767	0.718107	0.742588	0.870549	0.853631	0.849532	0.908754	0.960443	0.713422	0.742708	0.724623	0.809535	0.849481	0.882854	0.913889	0.947213
6.85	0.677317	0.718145	0.747273	0.871096	0.856697	0.855858	0.914777	0.963782	0.718425	0.745506	0.724793	0.812382	0.856093	0.884409	0.91827	0.950208
6.95	0.680857	0.724937	0.746965	0.874254	0.86305	0.85603	0.913168	0.965991	0.719469	0.751223	0.730569	0.820269	0.859636	0.890914	0.915975	0.956809
7.05	0.681437	0.726513	0.754584	0.879279	0.862918	0.857536	0.91909	0.965006	0.727581	0.755871	0.73261	0.819105	0.861028	0.889474	0.917495	0.953931
7.15	0.686006	0.729902	0.757565	0.877115	0.865742	0.8649	0.918136	0.96769	0.727406	0.762695	0.737123	0.822579	0.863819	0.893857	0.924317	0.960054
7.25	0.691099	0.735594	0.760671	0.883089	0.865574	0.862082	0.9214	0.968562	0.731283	0.765752	0.73799	0.822829	0.864874	0.891934	0.924673	0.957914
7.35	0.695155	0.735299	0.762705	0.884739	0.867837	0.862567	0.922116	0.978571	0.732768	0.769678	0.74244	0.822515	0.870554	0.896209	0.92358	0.96065
7.45	0.70133	0.744419	0.76727	0.886822	0.868023	0.869437	0.922399	0.973032	0.74083	0.769037	0.743821	0.828506	0.866065	0.899803	0.926492	0.96202
7.55	0.704747	0.742383	0.771986	0.887579	0.868662	0.867019	0.930192	0.977456	0.743689	0.774342	0.751039	0.830417	0.870403	0.90314	0.926808	0.967313
7.65	0.708857	0.74182	0.773635	0.892082	0.87465	0.869951	0.927635	0.976506	0.741891	0.777995	0.749774	0.824995	0.869651	0.901102	0.934003	0.970211
7.75	0.709086	0.746359	0.774107	0.897387	0.875873	0.870733	0.929533	0.975222	0.749107	0.781045	0.7558	0.82898	0.874235	0.906194	0.933301	0.970796
7.85	0.71612	0.749364	0.776546	0.893082	0.876738	0.870156	0.932306	0.978827	0.750867	0.78018	0.756262	0.834282	0.870745	0.909157	0.935255	0.969794
7.95	0.716059	0.753493	0.782152	0.898688	0.876971	0.872194	0.936579	0.986444	0.751532	0.789533	0.760758	0.837535	0.880919	0.909484	0.935561	0.974519
8.05	0.719924	0.753351	0.78742	0.897913	0.882059	0.873351	0.929276	0.981877	0.756116	0.790872	0.760843	0.834193	0.874339	0.916785	0.933259	0.972875
8.15	0.718717	0.756787	0.78375	0.899087	0.884091	0.876517	0.938172	0.985292	0.756929	0.791501	0.762764	0.833625	0.880858	0.915817	0.943569	0.975139
8.25	0.722842	0.759903	0.785277	0.902315	0.884433	0.88053	0.940783	0.9864	0.76065	0.792232	0.764126	0.837011	0.87929	0.915395	0.940256	0.977852
8.35	0.728795	0.75933	0.789352	0.904872	0.88447	0.877834	0.938422	0.983062	0.758399	0.802415	0.76637	0.83851	0.882269	0.915345	0.940786	0.97734
8.45	0.728238	0.766132	0.791598	0.908954	0.882512	0.877195	0.939282	0.988608	0.766634	0.801388	0.768222	0.839373	0.889184	0.916953	0.941071	0.975981
8.55	0.73269	0.766035	0.794928	0.905912	0.888505	0.877513	0.941406	0.987776	0.766134	0.805024	0.775445	0.843985	0.886009	0.921668	0.941971	0.979487
8.65	0.738287	0.766103	0.794388	0.907342	0.886938	0.881423	0.943847	0.992369	0.7727	0.809299	0.773494	0.844025	0.890779	0.921183	0.948259	0.979742
8.75	0.7368	0.772384	0.794968	0.908459	0.890565	0.888844	0.941726	0.990884	0.772181	0.8122	0.773814	0.844107	0.887433	0.922064	0.945035	0.987644
8.85	0.73573	0.772436	0.794124	0.910495	0.889254	0.88505	0.93841	0.993932	0.778155	0.809254	0.778441	0.846096	0.8888	0.924075	0.949105	0.985652
8.95	0.747391	0.774531	0.801824	0.913335	0.891901	0.884673	0.943392	0.990022	0.777703	0.81582	0.781167	0.846928	0.89249	0.923877	0.948726	0.98372
9.05	0.745706	0.77487	0.8062	0.909666	0.890866	0.882175	0.941502	0.99626	0.782037	0.81783	0.779791	0.84743	0.889325	0.923434	0.945044	0.983088
9.15	0.745704	0.77951	0.808724	0.910955	0.897196	0.886367	0.945601	0.99658	0.784196	0.820604	0.782713	0.848387	0.891807	0.926283	0.946703	0.98413
9.25	0.748664	0.781881	0.811019	0.915183	0.893362	0.886504	0.94762	0.996783	0.785808	0.821658	0.785207	0.84822	0.892429	0.92835	0.950274	0.988742
9.35	0.752948	0.781396	0.808979	0.909965	0.893977	0.887913	0.952131	0.994961	0.791447	0.820298	0.78302	0.851241	0.893053	0.927878	0.951916	0.989904
9.45	0.757711	0.780868	0.810793	0.916502	0.897055	0.888536	0.94833	0.994389	0.789607	0.827811	0.786046	0.846841	0.89365	0.925361	0.947924	0.986423
9.55	0.758642	0.785454	0.813485	0.913698	0.89336	0.890546	0.945365	0.996036	0.787898	0.825819	0.785626	0.848048	0.895297	0.927449	0.951532	0.985549
9.65	0.756137	0.789713	0.812905	0.92296	0.898111	0.890405	0.947161	0.992704	0.789232	0.825588	0.792378	0.849023	0.892283	0.931602	0.952032	0.989843
9.75	0.759592	0.787976	0.813718	0.915861	0.897541	0.888828	0.952593	0.998607	0.792406	0.827766	0.793217	0.852987	0.892068	0.931981	0.952114	0.989178
9.85	0.763454	0.788961	0.815709	0.916979	0.89755	0.893482	0.9514	0.997245	0.7958	0.826967	0.792574	0.852785	0.895038	0.929639	0.950535	0.99186
9.95	0.76681	0.788857	0.816584	0.917971	0.89727	0.890779	0.94626	0.996757	0.795925	0.831709	0.792107	0.852683	0.897317	0.930605	0.948855	0.98832
10.05	0.766803	0.792767	0.81759	0.915751	0.897489	0.895026	0.949242	0.994031	0.794984	0.832508	0.794431	0.852391	0.897468	0.932907	0.946319	0.988219
10.15	0.770114	0.794523	0.819661	0.925196	0.894548	0.891795	0.948037	0.99823	0.799653	0.839978	0.797954	0.851847	0.894305	0.933134	0.95013	0.990241
10.25	0.767812	0.794671	0.822289	0.917483	0.898457	0.889971	0.950005	0.99654	0.79789	0.837153	0.796672	0.855655	0.897873	0.93311	0.953274	0.985127
10.35	0.766667	0.794629	0.821676	0.923624	0.899933	0.891882	0.94647	0.999625	0.799406	0.835906	0.798439	0.851632	0.89484	0.937694	0.952975	0.991464
10.45	0.774246	0.798385	0.82166	0.922319	0.899923	0.896407	0.948499	0.992855	0.803304	0.835993	0.795963	0.849455	0.898113	0.931911	0.949765	0.990934
10.55	0.775671	0.792083	0.825702	0.926599	0.895231	0.891013	0.946661	0.996991	0.805948	0.841779	0.801088	0.85347	0.902544	0.932483	0.95502	0.991523
10.65	0.773131	0.798303	0.826621	0.921763	0.900585	0.89451	0.951773	0.996305	0.800454	0.84213	0.797183	0.853461	0.892782	0.9315	0.953326	0.991565
10.75	0.774601	0.799446	0.825692	0.921082	0.902966	0.896506	0.952659	1	0.803346	0.839337	0.803883	0.858146	0.896779	0.934458	0.955254	0.993255
10.85	0.776308	0.801069	0.825996	0.923224	0.896753	0.890138	0.949051	0.996218	0.807063	0.841557	0.804312	0.858764	0.89644	0.934887	0.950578	0.99174
10.95	0.776475	0.795755	0.826135	0.92563	0.899812	0.892047	0.953997	0.998247	0.806426	0.841527	0.802863	0.855964	0.897588	0.936824	0.955046	0.990679
11.05	0.779574	0.803405	0.823882	0.927183	0.901705	0.893303	0.949449	0.993514	0.805073	0.845005	0.804732	0.853815	0.900559	0.933259	0.955287	0.990863
11.15	0.782741	0.799599	0.829194	0.922686	0.899398	0.891399	0.94618	0.997792	0.804044	0.848293	0.800695	0.852073	0.898573	0.934156	0.951523	0.990809
11.25	0.780611	0.802111	0.829913	0.925239	0.905174	0.894724	0.947491	0.997521	0.809233	0.847018	0.805396	0.85257	0.899518	0.935959	0.954393	0.988516
11.35	0.781292	0.800923	0.829076	0.921089	0.899624	0.895467	0.947613	0.996182	0.809155	0.847051	0.810522	0.853277	0.901245	0.934343	0.952755	0.994535
11.45	0.78276	0.806883	0.830137	0.924426	0.899883	0.891512	0.952051	0.994351	0.809268	0.848882	0.804812	0.85669	0.898259	0.933035	0.952461	0.992272
11.55	0.783015	0.807967	0.831886	0.926026	0.900892	0.889292	0.950811	0.997813	0.815393	0.850089	0.805912	0.852815	0.896973	0.933812	0.954898	0.991455
11.65	0.782963	0.804013	0.828122	0.92587	0.902388	0.888347	0.949687	0.998013	0.811693	0.846645	0.80772	0.851896	0.903145	0.933141	0.94952	0.992041
11.75	0.787606	0.803956	0.830328	0.924645	0.901856	0.889417	0.947316	0.991042	0.81236	0.852738	0.806789	0.853746	0.901705	0.931708	0.950639	0.992522
11.85	0.784752	0.80612	0.833344	0.918694	0.900934	0.887796	0.946708	0.993616	0.813084	0.85278	0.805545	0.852716	0.903609	0.93266	0.951759	0.994721
11.95	0.78754	0.804649	0.832753	0.92558	0.897279	0.890313	0.946136	0.991549	0.810322	0.853084	0.810701	0.85776	0.89776	0.940331	0.952192	0.985542
12.05	0.789069	0.802328	0.83045	0.919993	0.902944	0.889775	0.944903	0.993811	0.811983	0.854934	0.81335	0.855304	0.901757	0.934927	0.9542	0.988363
12.15	0.788829	0.807277	0.833045	0.923841	0.903371	0.893645	0.947099	0.992263	0.813404	0.851632	0.810741	0.85225	0.902963	0.937274	0.946164	0.992225
12.25	0.789001	0.810077	0.837344	0.925251	0.897314	0.891177	0.945747	0.995166	0.816642	0.855292	0.814757	0.857208	0.902751	0.929561	0.947611	0.992242
12.35	0.786903	0.806176	0.832428	0.923158	0.901512	0.889205	0.943774	0.990439	0.817564	0.853096	0.813284	0.852085	0.907658	0.934904	0.949993	0.989647
12.45	0.788056	0.808366	0.8363	0.923221	0.901493	0.88995	0.943124	0.989216	0.817628	0.85665	0.811125	0.852099	0.902761	0.936367	0.946956	0.985066
12.55	0.792305	0.808561	0.830653	0.926311	0.900128	0.893282	0.946527	0.991042	0.817022	0.857345	0.814437	0.8483	0.902605	0.934161	0.946484	0.983861
12.65	0.789529	0.808507	0.836903	0.920987	0.89829	0.888095	0.948018	0.98865	0.815966	0.855474	0.809544	0.851729	0.901613	0.931856	0.94286	0.991523
12.75	0.788852	0.813522	0.833771	0.920457	0.901281	0.889521	0.945266	0.987062	0.816039	0.856751	0.815342	0.852082	0.90372	0.932236	0.946595	0.989543
12.85	0.792658	0.811323	0.837822	0.924779	0.899768	0.886542	0.943465	0.986786	0.813751	0.851719	0.811759	0.850911	0.901959	0.934722	0.946859	0.986206
12.95	0.792962	0.809151	0.833969	0.921607	0.897373	0.88805	0.938863	0.984573	0.818372	0.853855	0.815436	0.853881	0.902558	0.932997	0.945683	0.987314
13.05	0.791275	0.807892	0.835958	0.920641	0.893051	0.887155	0.939721	0.988445	0.817932	0.855167	0.814342	0.853228	0.899376	0.930553	0.94536	0.982584
13.15	0.797004	0.811427	0.834497	0.923445	0.896449	0.885177	0.937512	0.98631	0.813489	0.856711	0.813649	0.850159	0.900055	0.930779	0.944879	0.983385
13.25	0.794275	0.812966	0.839672	0.920012	0.891863	0.882623	0.937774	0.983706	0.813708	0.850317	0.813199	0.852591	0.901031	0.929764	0.945483	0.98569
13.35	0.795039	0.809636	0.838699	0.916385	0.892073	0.88493	0.938429	0.985525	0.818198	0.857036	0.813553	0.851182	0.900729	0.929992	0.943647	0.980998
13.45	0.792505	0.808109	0.835611	0.9191	0.896103	0.881675	0.936881	0.980904	0.814981	0.856143	0.813341	0.850864	0.900536	0.928811	0.943578	0.984281
13.55	0.797214	0.8117	0.836599	0.921091	0.896299	0.885623	0.932134	0.978849	0.816075	0.858702	0.810883	0.847089	0.900922	0.927803	0.941634	0.984276
13.65	0.800395	0.808872	0.835647	0.919743	0.8922	0.878275	0.937993	0.982813	0.816096	0.857677	0.814562	0.847367	0.894715	0.928526	0.94186	0.981323
13.75	0.797169	0.814797	0.837968	0.91662	0.893838	0.882906	0.932757	0.980937	0.81873	0.857647	0.816541	0.846327	0.900526	0.926184	0.943644	0.98709
13.85	0.795076	0.811338	0.835986	0.917403	0.895636	0.885712	0.9364	0.977852	0.81561	0.858038	0.815007	0.848222	0.899624	0.927822	0.941903	0.981399
13.95	0.795696	0.808828	0.837087	0.916413	0.892855	0.879898	0.933405	0.979299	0.816525	0.859006	0.813765	0.847058	0.89579	0.925597	0.939572	0.980967
14.05	0.794525	0.808802	0.840758	0.915701	0.890815	0.882733	0.932691	0.978007	0.815509	0.85484	0.814276	0.848776	0.897015	0.928795	0.938443	0.978568
14.15	0.796834	0.80899	0.835741	0.921836	0.893666	0.880924	0.927711	0.97542	0.816614	0.859817	0.813852	0.847916	0.894262	0.925816	0.938038	0.977345
14.25	0.800459	0.8111	0.840073	0.914285	0.893645	0.87889	0.935241	0.972634	0.814901	0.856002	0.814335	0.846	0.89274	0.92942	0.938872	0.981029
14.35	0.800685	0.811684	0.83835	0.914247	0.892356	0.875197	0.931161	0.973421	0.811326	0.861947	0.812325	0.844892	0.89323	0.921633	0.937727	0.976223
14.45	0.800056	0.805055	0.829585	0.915543	0.89249	0.882283	0.932354	0.979214	0.813906	0.858349	0.814265	0.847798	0.888998	0.927423	0.935043	0.977989
14.55	0.796212	0.807576	0.834483	0.915715	0.889634	0.877009	0.93217	0.978212	0.815563	0.858681	0.814771	0.846728	0.890888	0.92255	0.937131	0.977284
14.65	0.800777	0.809919	0.835701	0.912706	0.892217	0.874989	0.928691	0.971298	0.81315	0.857029	0.815815	0.841202	0.891936	0.919764	0.932177	0.977352
14.75	0.803037	0.813016	0.834575	0.916394	0.885701	0.877082	0.928578	0.971625	0.813645	0.856499	0.817236	0.843042	0.885684	0.922644	0.930982	0.976424
14.85	0.799123	0.8094	0.830538	0.911179	0.887633	0.877466	0.927442	0.968856	0.813902	0.858504	0.815094	0.842184	0.886389	0.917733	0.931972	0.975827
14.95	0.795963	0.812188	0.835915	0.9117	0.886358	0.872232	0.92888	0.968258	0.814569	0.856513	0.815313	0.845231	0.889316	0.92098	0.933805	0.970699
15.05	0.795899	0.805618	0.831782	0.905626	0.884213	0.874601	0.927273	0.966238	0.814003	0.859035	0.814807	0.839908	0.886311	0.921393	0.932794	0.973454
15.15	0.798303	0.809688	0.831758	0.908608	0.88332	0.872289	0.925505	0.96892	0.812259	0.856553	0.814288	0.840235	0.891041	0.919684	0.930108	0.973303
15.25	0.795722	0.806299	0.829307	0.913387	0.884348	0.872072	0.92887	0.963573	0.815297	0.855587	0.812233	0.841301	0.885177	0.915951	0.925696	0.974159
15.35	0.796629	0.808144	0.831461	0.910078	0.882604	0.869956	0.922309	0.967075	0.813583	0.853004	0.814981	0.840895	0.890709	0.913288	0.927303	0.964859
15.45	0.801098	0.807341	0.834063	0.908775	0.882413	0.870208	0.920829	0.965779	0.809912	0.85689	0.808528	0.838421	0.88727	0.914393	0.929606	0.971105
15.55	0.796933	0.805535	0.833229	0.904816	0.879387	0.871506	0.920104	0.962123	0.812909	0.859513	0.813063	0.836318	0.890423	0.915147	0.924782	0.965915
15.65	0.799236	0.804637	0.836212	0.902739	0.882962	0.86857	0.923327	0.964079	0.813965	0.856357	0.81192	0.83325	0.885609	0.910382	0.92506	0.965244
15.75	0.798458	0.808071	0.833137	0.904201	0.878433	0.867554	0.919656	0.964548	0.80814	0.851868	0.812547	0.836156	0.883283	0.913415	0.921607	0.966987
15.85	0.797881	0.806004	0.833917	0.903795	0.880572	0.864146	0.920535	0.957323	0.810904	0.857621	0.812221	0.832265	0.88579	0.910408	0.9244	0.963863
15.95	0.795194	0.804762	0.831214	0.903402	0.878562	0.869484	0.915786	0.961341	0.811396	0.852992	0.807088	0.837735	0.880627	0.914685	0.923785	0.964562
16.05	0.795974	0.805771	0.828412	0.903739	0.880457	0.869055	0.919333	0.956816	0.809125	0.851234	0.81203	0.832517	0.883066	0.909581	0.922583	0.963919
16.15	0.799005	0.803492	0.82803	0.899445	0.879194	0.86092	0.917759	0.957301	0.805971	0.857621	0.81114	0.83276	0.880994	0.909696	0.918635	0.959533
16.25	0.795072	0.804166	0.830351	0.898568	0.876554	0.86684	0.915258	0.955411	0.804805	0.8555	0.805776	0.83634	0.882729	0.906899	0.922142	0.959045
16.35	0.798508	0.803742	0.831638	0.89981	0.872887	0.862148	0.916816	0.954257	0.806367	0.850822	0.808385	0.830354	0.882481	0.907389	0.922597	0.955378
16.45	0.798868	0.801065	0.831346	0.899732	0.869906	0.863677	0.911379	0.951134	0.808495	0.854408	0.804713	0.831075	0.881968	0.905299	0.920747	0.955204
16.55	0.797391	0.800263	0.827695	0.902379	0.876717	0.85672	0.912501	0.952984	0.806742	0.848307	0.809096	0.832182	0.880704	0.902904	0.913545	0.952213
16.65	0.796677	0.804503	0.830851	0.896355	0.87292	0.861101	0.913684	0.95054	0.806372	0.857185	0.810065	0.831563	0.87933	0.907705	0.916392	0.956411
16.75	0.792861	0.804343	0.832581	0.8978	0.871395	0.864471	0.907618	0.948799	0.809756	0.855441	0.808578	0.828379	0.876639	0.901132	0.9144	0.952187
16.85	0.796573	0.801164	0.830417	0.892361	0.871857	0.863552	0.907507	0.946923	0.807565	0.849938	0.809198	0.828954	0.874949	0.904632	0.919123	0.953865
16.95	0.792112	0.802566	0.828046	0.898919	0.870123	0.859134	0.907745	0.949626	0.806341	0.852339	0.806627	0.83305	0.876007	0.904745	0.91782	0.951115
17.05	0.79153	0.801168	0.827552	0.893261	0.867776	0.856584	0.907641	0.947901	0.804324	0.855243	0.804487	0.82701	0.875432	0.901179	0.911603	0.950213
17.15	0.794869	0.802651	0.828327	0.893831	0.870851	0.859416	0.900798	0.946979	0.806447	0.847845	0.806867	0.829329	0.874141	0.900345	0.905829	0.949824
17.25	0.792253	0.798748	0.825011	0.892947	0.865553	0.856562	0.901377	0.944144	0.802007	0.847079	0.805012	0.824401	0.871339	0.904448	0.911209	0.944733
17.35	0.795821	0.796919	0.823142	0.894823	0.869543	0.853829	0.903854	0.943265	0.804392	0.851807	0.802547	0.823581	0.872567	0.89278	0.912755	0.944375
17.45	0.792321	0.795256	0.825367	0.891936	0.868699	0.851957	0.905221	0.945994	0.805517	0.845993	0.801925	0.821782	0.870964	0.89894	0.909498	0.948023
17.55	0.794626	0.799457	0.825395	0.89003	0.864589	0.851757	0.904924	0.941594	0.803483	0.841751	0.800954	0.82528	0.869534	0.89973	0.906767	0.945902
17.65	0.793641	0.799707	0.825647	0.887098	0.865204	0.853308	0.903765	0.946722	0.801213	0.841652	0.802639	0.817884	0.868615	0.893152	0.908714	0.938516
17.75	0.793087	0.800221	0.823885	0.889926	0.861907	0.851397	0.898818	0.942141	0.80522	0.843754	0.805486	0.819247	0.870917	0.896075	0.903126	0.944531
17.85	0.791888	0.797673	0.821827	0.888663	0.858339	0.849787	0.900489	0.936728	0.802137	0.840122	0.798977	0.816287	0.864985	0.891705	0.904295	0.939605
17.95	0.794162	0.795644	0.825579	0.889462	0.859579	0.849207	0.897564	0.936893	0.79786	0.840158	0.804595	0.818778	0.866166	0.894291	0.905942	0.936904
18.05	0.792098	0.79445	0.824912	0.886987	0.864893	0.848957	0.892412	0.935	0.799526	0.840916	0.796533	0.820352	0.864764	0.890093	0.900854	0.937237
18.15	0.793014	0.793978	0.817479	0.887296	0.858148	0.846678	0.895259	0.934013	0.800834	0.842785	0.798218	0.817972	0.867606	0.890445	0.900859	0.935165
18.25	0.789889	0.795486	0.824613	0.889007	0.860906	0.846172	0.896183	0.935542	0.792387	0.839672	0.80015	0.814043	0.864698	0.888359	0.899416	0.93242
18.35	0.791671	0.795411	0.820314	0.888078	0.857962	0.846153	0.892066	0.935745	0.79711	0.840153	0.79678	0.816018	0.863126	0.889356	0.899063	0.932502
18.45	0.788079	0.794223	0.818217	0.881975	0.859808	0.847235	0.895639	0.931208	0.794412	0.83745	0.797181	0.815016	0.862424	0.880174	0.901389	0.936669
18.55	0.786724	0.792859	0.818471	0.882667	0.855507	0.84419	0.896313	0.929273	0.796712	0.835187	0.796151	0.813612	0.86043	0.885858	0.894017	0.926485
18.65	0.793674	0.79103	0.817719	0.883184	0.859119	0.838385	0.893511	0.928849	0.797619	0.839837	0.796785	0.814517	0.858672	0.884228	0.89899	0.931095
18.75	0.789708	0.792387	0.814835	0.878425	0.853459	0.841751	0.892252	0.92871	0.794442	0.842017	0.794897	0.811545	0.856777	0.885705	0.895464	0.926735
18.85	0.786698	0.791355	0.816593	0.877351	0.856108	0.840697	0.888159	0.930237	0.7951	0.836733	0.796186	0.811837	0.857307	0.885323	0.893805	0.924478
18.95	0.785947	0.792951	0.816369	0.876804	0.854286	0.840169	0.885738	0.928166	0.796106	0.836123	0.792197	0.811194	0.858608	0.886195	0.889379	0.922215
19.05	0.791664	0.793024	0.817279	0.871916	0.852742	0.835414	0.889398	0.922512	0.790568	0.838694	0.79431	0.807967	0.85981	0.883511	0.892153	0.927197
19.15	0.786649	0.787676	0.814434	0.876971	0.848559	0.837492	0.891432	0.92406	0.793415	0.836455	0.7942	0.807821	0.860229	0.881154	0.888927	0.919825
19.25	0.787726	0.787556	0.81368	0.878041	0.852144	0.839227	0.887362	0.921845	0.789915	0.834367	0.791822	0.805446	0.859263	0.882481	0.893039	0.915814
19.35	0.784726	0.789418	0.815672	0.874895	0.849671	0.834407	0.883233	0.919929	0.78905	0.829444	0.793101	0.808413	0.856277	0.881968	0.887913	0.919538
19.45	0.787116	0.786811	0.815198	0.874716	0.847096	0.836889	0.885906	0.91794	0.789479	0.832793	0.79506	0.803631	0.860574	0.879045	0.881862	0.916163
19.55	0.786941	0.78852	0.811538	0.873639	0.84945	0.833231	0.883429	0.912675	0.789741	0.834897	0.790365	0.804793	0.852931	0.877162	0.884525	0.917264
19.65	0.783086	0.787648	0.813461	0.868237	0.845538	0.832616	0.879392	0.916677	0.786312	0.83001	0.790078	0.800141	0.85817	0.872157	0.885651	0.914542
19.75	0.77993	0.785664	0.809516	0.864151	0.843728	0.830891	0.880219	0.920613	0.784379	0.830545	0.790443	0.803766	0.857585	0.876194	0.885387	0.910597
19.85	0.784954	0.785706	0.810032	0.870158	0.840747	0.835124	0.875369	0.915423	0.787356	0.830193	0.78754	0.803414	0.856058	0.876198	0.886426	0.914721
19.95	0.781891	0.787009	0.816652	0.872168	0.846061	0.827731	0.879865	0.914858	0.780149	0.832402	0.788534	0.803638	0.854868	0.87419	0.880337	0.910792
20.05	0.780324	0.785348	0.813378	0.870952	0.843094	0.829329	0.877063	0.912305	0.782661	0.830448	0.791079	0.799208	0.851929	0.872696	0.875588	0.908869
20.15	0.783222	0.786333	0.808915	0.867269	0.84122	0.832951	0.879342	0.908593	0.784606	0.826519	0.785645	0.797716	0.848561	0.870886	0.88337	0.905608
20.25	0.776892	0.782129	0.809964	0.865914	0.839507	0.827064	0.871407	0.908511	0.781667	0.826432	0.784695	0.797254	0.846337	0.871787	0.880909	0.910418
20.35	0.78084	0.781853	0.804946	0.863661	0.846141	0.826713	0.87086	0.91297	0.782089	0.832637	0.784561	0.796634	0.850166	0.868996	0.879837	0.908742
20.45	0.782291	0.78002	0.808743	0.863366	0.842078	0.825223	0.874626	0.907422	0.781335	0.828574	0.78162	0.79309	0.844864	0.864384	0.87708	0.906567
20.55	0.7826	0.776649	0.809565	0.866501	0.839985	0.828219	0.869461	0.909871	0.77825	0.824632	0.784756	0.796738	0.840339	0.864792	0.869677	0.904241
20.65	0.777642	0.781893	0.801548	0.863416	0.838265	0.822214	0.867877	0.907495	0.782529	0.823114	0.78339	0.797591	0.845168	0.866823	0.87618	0.898988
20.75	0.780974	0.784912	0.80644	0.866201	0.836363	0.824457	0.867863	0.905136	0.778483	0.825383	0.779327	0.793021	0.846643	0.867505	0.872696	0.904999
20.85	0.779166	0.777693	0.804814	0.861309	0.837855	0.819204	0.869899	0.90445	0.775884	0.819171	0.781059	0.793462	0.841451	0.865138	0.868412	0.908723
20.95	0.781217	0.781884	0.805229	0.86063	0.833566	0.822159	0.870135	0.898257	0.775469	0.826114	0.780599	0.791791	0.844447	0.866025	0.870417	0.899775
21.05	0.777653	0.780689	0.806916	0.859742	0.832932	0.821207	0.865982	0.903581	0.773838	0.818921	0.778603	0.793219	0.8363	0.863703	0.87091	0.894095
21.15	0.775716	0.77677	0.804951	0.85824	0.833698	0.820288	0.865405	0.90039	0.777693	0.823267	0.782544	0.788834	0.841348	0.862791	0.867304	0.89846
21.25	0.772021	0.775063	0.802594	0.853216	0.834367	0.817972	0.860248	0.898667	0.778638	0.822826	0.774189	0.788857	0.836658	0.859341	0.870234	0.896966
21.35	0.778231	0.777788	0.803716	0.853522	0.834695	0.818582	0.862447	0.895936	0.774158	0.823392	0.777703	0.789597	0.830872	0.861575	0.868539	0.895926
21.45	0.777642	0.775726	0.805802	0.856796	0.83206	0.820456	0.856306	0.893122	0.774964	0.82009	0.7803	0.790457	0.834329	0.855712	0.867736	0.894354
21.55	0.77914	0.77647	0.798819	0.852492	0.829734	0.817017	0.856527	0.893322	0.775094	0.820079	0.776982	0.789427	0.835402	0.856122	0.86589	0.89154
21.65	0.774613	0.774776	0.800344	0.851375	0.830229	0.816077	0.857658	0.89537	0.772568	0.818386	0.775584	0.785829	0.830526	0.856923	0.86293	0.889287
21.75	0.777653	0.770913	0.804249	0.854833	0.827903	0.818021	0.859317	0.892601	0.770539	0.816921	0.771693	0.785836	0.829272	0.854547	0.862683	0.891182
21.85	0.773425	0.774441	0.798986	0.85179	0.825025	0.81274	0.860722	0.895568	0.771019	0.81746	0.773831	0.785657	0.827724	0.85578	0.862006	0.889627
21.95	0.774601	0.77503	0.798041	0.85376	0.823218	0.817276	0.855495	0.886438	0.768311	0.817001	0.773873	0.786972	0.832126	0.851986	0.858728	0.885385
22.05	0.773861	0.770449	0.800172	0.851781	0.823467	0.815269	0.855177	0.890247	0.772356	0.81455	0.772044	0.779112	0.827391	0.855353	0.857375	0.886009
22.15	0.772162	0.768712	0.795468	0.849139	0.819155	0.810138	0.857008	0.882894	0.765627	0.813819	0.769584	0.781396	0.823691	0.854218	0.855332	0.885887
22.25	0.773159	0.77339	0.797447	0.850072	0.823387	0.807369	0.854611	0.887605	0.768111	0.817102	0.771	0.781245	0.828108	0.849228	0.854976	0.884067
22.35	0.771705	0.772372	0.800301	0.852327	0.818641	0.808682	0.852563	0.884213	0.764274	0.810065	0.769139	0.78021	0.828247	0.847301	0.852957	0.885981
22.45	0.767711	0.769643	0.797542	0.84472	0.821441	0.811458	0.845382	0.885022	0.764656	0.81014	0.770324	0.777022	0.826274	0.849702	0.848668	0.88221
22.55	0.769968	0.76694	0.796754	0.84755	0.821606	0.803452	0.851455	0.883332	0.764065	0.808726	0.767326	0.775436	0.824679	0.845625	0.855497	0.87934
22.65	0.76878	0.768264	0.794414	0.843056	0.821723	0.806252	0.848519	0.88485	0.765436	0.812445	0.76767	0.774213	0.817373	0.843205	0.849688	0.877992
22.75	0.769968	0.767143	0.795859	0.843584	0.81751	0.805208	0.845724	0.888119	0.762566	0.812238	0.766787	0.77569	0.817599	0.842512	0.850277	0.878364
22.85	0.769645	0.765488	0.794791	0.845019	0.813279	0.803028	0.844237	0.882363	0.761409	0.807041	0.764701	0.775193	0.821391	0.843813	0.850562	0.875555
22.95	0.767715	0.766777	0.794294	0.839585	0.815099	0.801979	0.848953	0.876747	0.759908	0.808689	0.7611	0.77438	0.82252	0.842314	0.85245	0.876696
23.05	0.766282	0.766883	0.794659	0.845229	0.819053	0.80418	0.845594	0.877867	0.759031	0.805981	0.76382	0.773077	0.817807	0.838661	0.848889	0.874226
23.15	0.76855	0.764505	0.793274	0.842078	0.815306	0.802894	0.842062	0.877768	0.758866	0.807663	0.76319	0.770991	0.816982	0.839799	0.847543	0.872913
23.25	0.762959	0.765655	0.789559	0.839349	0.811477	0.801437	0.838958	0.879898	0.760266	0.807527	0.765031	0.768469	0.815532	0.840139	0.844053	0.872399
23.35	0.764956	0.765014	0.788791	0.840714	0.811745	0.803492	0.839552	0.874297	0.757827	0.806577	0.764025	0.77269	0.81906	0.837714	0.842248	0.873648
23.45	0.763617	0.761538	0.792253	0.842132	0.81179	0.799644	0.840843	0.878322	0.757261	0.805104	0.760681	0.77229	0.810468	0.837252	0.842415	0.868476
23.55	0.762391	0.7618	0.788904	0.834544	0.815657	0.799568	0.838972	0.871575	0.751987	0.80373	0.758046	0.76648	0.812598	0.836135	0.843949	0.86741
23.65	0.761006	0.760539	0.788779	0.832609	0.812709	0.796321	0.840909	0.870026	0.754782	0.803914	0.757902	0.765146	0.808571	0.840443	0.840886	0.87058
23.75	0.761333	0.762276	0.789067	0.835548	0.807529	0.795486	0.837598	0.869816	0.759069	0.803122	0.757584	0.767574	0.811062	0.832826	0.841934	0.863736
23.85	0.758534	0.759809	0.786277	0.832076	0.805182	0.79749	0.836224	0.86865	0.750973	0.80152	0.754751	0.766157	0.808305	0.829079	0.839241	0.863432
23.95	0.76201	0.758159	0.782197	0.833585	0.803815	0.794815	0.832628	0.869661	0.753123	0.798802	0.753851	0.764743	0.80649	0.829611	0.841178	0.863006
24.05	0.762672	0.757513	0.782322	0.833064	0.809836	0.794414	0.831195	0.868704	0.751963	0.796842	0.757193	0.766282	0.807112	0.828103	0.839531	0.862136
24.15	0.76081	0.75802	0.782072	0.833566	0.806158	0.789673	0.835319	0.864618	0.75095	0.800216	0.754501	0.761725	0.806591	0.828343	0.832713	0.859697
24.25	0.75761	0.751068	0.782972	0.834954	0.805257	0.796394	0.830457	0.861995	0.75247	0.79201	0.75209	0.757907	0.808349	0.826083	0.834582	0.863062
24.35	0.759403	0.757334	0.784156	0.835366	0.807079	0.790917	0.829187	0.859591	0.747292	0.797737	0.752449	0.761934	0.804998	0.825268	0.834782	0.859756
24.45	0.761663	0.755456	0.779838	0.82774	0.80074	0.79408	0.830373	0.866006	0.751171	0.796898	0.752109	0.756832	0.803923	0.82494	0.834954	0.860156
24.55	0.75818	0.752159	0.781636	0.82951	0.802069	0.796903	0.828084	0.861125	0.745777	0.79168	0.752804	0.757351	0.802967	0.824848	0.831878	0.8594
24.65	0.754501	0.752691	0.783665	0.82988	0.804381	0.791421	0.827874	0.859928	0.744323	0.79342	0.749102	0.758357	0.799969	0.819579	0.82692	0.854651
24.75	0.754572	0.753841	0.777368	0.825002	0.801734	0.793966	0.82811	0.857116	0.745263	0.79157	0.748921	0.75768	0.797935	0.818537	0.825709	0.858384
24.85	0.754779	0.751725	0.781615	0.822633	0.801284	0.787997	0.823696	0.857665	0.746658	0.792491	0.748294	0.753243	0.79995	0.823467	0.826199	0.85196
24.95	0.752847	0.754002	0.77869	0.825313	0.79851	0.785718	0.825586	0.859841	0.743137	0.790339	0.747038	0.754676	0.795503	0.820265	0.829102	0.852415
25.05	0.756153	0.753438	0.776089	0.827179	0.800197	0.784881	0.823135	0.856954	0.743877	0.793047	0.745247	0.751796	0.797221	0.820437	0.826746	0.847513
25.15	0.755079	0.747342	0.778603	0.821768	0.798755	0.785002	0.825664	0.853572	0.744085	0.788718	0.746795	0.749232	0.791907	0.816089	0.825577	0.848255
25.25	0.752795	0.753266	0.774116	0.819544	0.797466	0.785357	0.820823	0.854121	0.743665	0.787714	0.745049	0.753651	0.794129	0.81369	0.821549	0.844701
25.35	0.755392	0.749731	0.773503	0.823072	0.798819	0.783005	0.82124	0.850991	0.742374	0.789569	0.745103	0.748789	0.788706	0.817925	0.816171	0.845239
25.45	0.752206	0.749147	0.773213	0.821	0.796007	0.781108	0.824193	0.852554	0.739814	0.784801	0.742074	0.748296	0.791171	0.814755	0.820446	0.845432
25.55	0.748784	0.747408	0.774074	0.822407	0.793771	0.781401	0.822261	0.852335	0.738542	0.785129	0.739843	0.751772	0.787111	0.816991	0.823715	0.844136
25.65	0.753662	0.745379	0.773195	0.819169	0.793648	0.779115	0.822742	0.851175	0.737797	0.783133	0.74251	0.74679	0.792517	0.811314	0.817316	0.842521
25.75	0.751947	0.743404	0.771361	0.819758	0.791431	0.779162	0.822975	0.848038	0.737392	0.784719	0.741561	0.74429	0.786866	0.809384	0.819772	0.84016
25.85	0.750436	0.740561	0.769815	0.813279	0.788923	0.776774	0.818302	0.845771	0.738021	0.783588	0.742395	0.746826	0.786885	0.810305	0.815203	0.838574
25.95	0.749182	0.743731	0.76936	0.815417	0.791518	0.777272	0.815587	0.845799	0.73607	0.781471	0.738148	0.742598	0.786687	0.80895	0.814034	0.836382
26.05	0.746225	0.744846	0.769933	0.81512	0.789524	0.774137	0.815464	0.844793	0.732146	0.778886	0.738209	0.74601	0.786943	0.80525	0.811599	0.833229
26.15	0.749927	0.74392	0.766732	0.814034	0.783177	0.775495	0.812471	0.843414	0.733916	0.77936	0.737566	0.741033	0.788883	0.804088	0.810586	0.837622
26.25	0.746628	0.744867	0.768015	0.813725	0.788744	0.776381	0.818111	0.843014	0.733164	0.777602	0.733845	0.741547	0.783663	0.806396	0.810256	0.839509
26.35	0.749477	0.739489	0.763332	0.811995	0.782831	0.772681	0.81499	0.838847	0.730373	0.778697	0.731842	0.741261	0.778631	0.799118	0.809577	0.836599
26.45	0.745369	0.740623	0.768425	0.808446	0.781386	0.773086	0.81373	0.840634	0.729883	0.777413	0.731201	0.738016	0.779242	0.80037	0.80776	0.834935
26.55	0.744535	0.740453	0.766009	0.807777	0.785659	0.771255	0.812888	0.839785	0.728274	0.777019	0.732544	0.739619	0.781132	0.802017	0.808743	0.830672
26.65	0.745602	0.739876	0.762589	0.809964	0.783925	0.76952	0.806513	0.836917	0.731835	0.776254	0.730209	0.735874	0.780866	0.806337	0.804341	0.829826
26.75	0.743995	0.736671	0.7676	0.807048	0.781752	0.769365	0.806997	0.836601	0.728267	0.774974	0.73067	0.740479	0.780717	0.794153	0.808008	0.826571
26.85	0.746302	0.741049	0.767498	0.80726	0.781518	0.767343	0.809924	0.836186	0.726174	0.774913	0.728071	0.735591	0.778785	0.793231	0.803285	0.830012
26.95	0.743064	0.737788	0.760893	0.801986	0.775528	0.765592	0.805106	0.832423	0.725844	0.769796	0.729051	0.735822	0.777986	0.797853	0.803143	0.826828
27.05	0.741818	0.735235	0.763506	0.804411	0.777613	0.763334	0.806497	0.833745	0.723143	0.77508	0.725893	0.731545	0.775957	0.796469	0.80644	0.829121
27.15	0.745126	0.737517	0.763603	0.80204	0.778917	0.766268	0.79912	0.833361	0.724366	0.76793	0.726966	0.733103	0.772459	0.796328	0.797424	0.824087
27.25	0.744862	0.733409	0.75649	0.80065	0.775577	0.764628	0.801833	0.832998	0.721234	0.769598	0.7246	0.73203	0.773063	0.794367	0.800247	0.821099
27.35	0.745023	0.738247	0.762592	0.803836	0.773397	0.765203	0.802691	0.832788	0.724873	0.771875	0.723706	0.727406	0.775148	0.796575	0.795345	0.819664
27.45	0.741646	0.73368	0.757471	0.802769	0.774568	0.761722	0.799898	0.831464	0.72246	0.7704	0.723475	0.732113	0.77307	0.789145	0.795925	0.824339
27.55	0.741026	0.732528	0.758329	0.800174	0.775806	0.762142	0.797935	0.831341	0.722702	0.77052	0.724701	0.727734	0.776433	0.793226	0.799549	0.819923
27.65	0.739649	0.733979	0.760574	0.79461	0.774165	0.761618	0.797021	0.828784	0.721395	0.767284	0.723709	0.728186	0.770748	0.790914	0.795814	0.818457
27.75	0.738162	0.734677	0.757845	0.801524	0.77002	0.764689	0.795873	0.826517	0.718875	0.766916	0.724859	0.726221	0.7713	0.788105	0.795227	0.81718
27.85	0.736204	0.730359	0.754369	0.79749	0.769341	0.76126	0.79764	0.82498	0.716266	0.766061	0.725804	0.724873	0.770828	0.788016	0.796229	0.818386
27.95	0.738497	0.73385	0.759424	0.797025	0.769942	0.760711	0.793101	0.823427	0.716672	0.763337	0.72262	0.726985	0.769403	0.789878	0.791822	0.813869
28.05	0.734271	0.728971	0.757567	0.797014	0.770416	0.759912	0.796295	0.8268	0.71777	0.764807	0.720803	0.727171	0.768821	0.789196	0.791487	0.809077
28.15	0.737052	0.730546	0.754907	0.798041	0.768474	0.75411	0.796281	0.823543	0.714727	0.761008	0.716775	0.72097	0.76541	0.782447	0.791947	0.811757
28.25	0.738695	0.728531	0.754645	0.792314	0.768321	0.757754	0.794367	0.819909	0.714937	0.761232	0.719158	0.722172	0.763575	0.782687	0.788897	0.809049
28.35	0.737649	0.730421	0.755237	0.792812	0.767911	0.755786	0.790603	0.821822	0.713224	0.75694	0.71843	0.72061	0.765356	0.780543	0.784342	0.813053
28.45	0.735334	0.730272	0.750959	0.791282	0.768406	0.755345	0.794494	0.819779	0.709201	0.760014	0.713721	0.720049	0.762721	0.782635	0.789331	0.810777
28.55	0.737835	0.722903	0.752211	0.79313	0.769556	0.756585	0.791094	0.821537	0.715317	0.757098	0.716323	0.718338	0.757256	0.780192	0.784495	0.8062
28.65	0.734573	0.727446	0.754075	0.793658	0.766487	0.754124	0.789199	0.820128	0.712456	0.759422	0.715274	0.71809	0.763016	0.783887	0.788777	0.807633
28.75	0.735268	0.728686	0.748923	0.792618	0.763756	0.753365	0.790917	0.812686	0.7084	0.757812	0.712958	0.716705	0.75756	0.781061	0.784163	0.802198
28.85	0.731354	0.725045	0.750881	0.797579	0.765931	0.747761	0.790919	0.813117	0.712123	0.755119	0.709793	0.71538	0.758684	0.779433	0.782013	0.805005
28.95	0.730079	0.72738	0.753848	0.794096	0.763172	0.7512	0.786621	0.812693	0.708817	0.755423	0.71239	0.712913	0.763247	0.780024	0.781186	0.802495
29.05	0.732405	0.722771	0.747045	0.787914	0.763772	0.748593	0.786536	0.816006	0.711529	0.754459	0.712962	0.714266	0.75617	0.776588	0.776673	0.801706
29.15	0.728078	0.722717	0.746474	0.789364	0.759771	0.749868	0.784042	0.811823	0.704556	0.753493	0.713832	0.711522	0.757211	0.778075	0.77799	0.797904
29.25	0.727873	0.720511	0.749352	0.784191	0.755977	0.748174	0.784794	0.816143	0.704365	0.753797	0.711859	0.714918	0.752107	0.775301	0.781728	0.796113
29.35	0.733341	0.720574	0.748452	0.78848	0.757207	0.744379	0.784325	0.806768	0.702828	0.749029	0.711661	0.714294	0.752185	0.775471	0.776348	0.800049
29.45	0.726289	0.7211	0.749734	0.788645	0.759212	0.747969	0.785188	0.808773	0.701664	0.749651	0.709705	0.708525	0.753398	0.775068	0.78136	0.802031
29.55	0.728639	0.716818	0.744431	0.782018	0.755927	0.746491	0.782972	0.80978	0.703983	0.747969	0.705008	0.71136	0.753731	0.771691	0.778954	0.792074
29.65	0.726897	0.723303	0.749456	0.78433	0.757539	0.745711	0.781787	0.80813	0.702397	0.750132	0.708263	0.709573	0.754334	0.770293	0.775846	0.792522
29.75	0.724291	0.714874	0.744646	0.782784	0.758244	0.740561	0.781667	0.803084	0.701733	0.750575	0.707485	0.707144	0.750561	0.772311	0.769278	0.795607
29.85	0.728267	0.715998	0.745426	0.781299	0.752856	0.740849	0.776164	0.807044	0.70244	0.748591	0.701186	0.705041	0.750191	0.770659	0.774413	0.795435
29.95	0.722142	0.718689	0.740832	0.781087	0.755319	0.743863	0.781021	0.80522	0.697795	0.752562	0.702348	0.701893	0.746119	0.766839	0.76966	0.790464
30.05	0.726714	0.716311	0.742715	0.781726	0.752915	0.738316	0.774121	0.801859	0.699004	0.741422	0.703363	0.70387	0.750304	0.762182	0.770751	0.791798
30.15	0.725337	0.713344	0.740236	0.779708	0.75194	0.744287	0.774733	0.801991	0.702041	0.742994	0.700066	0.704554	0.745859	0.766888	0.767802	0.790568
30.25	0.721823	0.712993	0.739013	0.778853	0.756043	0.744031	0.778063	0.802783	0.702114	0.746253	0.698761	0.702739	0.74399	0.762189	0.770418	0.790052
30.35	0.72164	0.716867	0.738455	0.774875	0.751657	0.734604	0.775247	0.800405	0.695004	0.750217	0.700408	0.705039	0.741858	0.764319	0.766351	0.789102
30.45	0.725054	0.711789	0.740642	0.780411	0.750931	0.735252	0.774293	0.80304	0.698572	0.744556	0.696984	0.700757	0.742649	0.761093	0.764611	0.786753
30.55	0.72242	0.709321	0.739409	0.776916	0.748268	0.734682	0.776876	0.796606	0.690722	0.745178	0.69803	0.699845	0.735634	0.761187	0.760937	0.786017
30.65	0.720025	0.709083	0.738992	0.774312	0.750031	0.735742	0.771528	0.796422	0.693147	0.74099	0.700573	0.696496	0.741118	0.758651	0.766466	0.783823
30.75	0.72085	0.715376	0.734495	0.772914	0.748914	0.737512	0.767772	0.797567	0.691858	0.738608	0.696868	0.696062	0.739939	0.760197	0.761732	0.785202
30.85	0.717409	0.714339	0.734279	0.773199	0.751091	0.737559	0.768837	0.796827	0.691302	0.739595	0.69437	0.698815	0.7329	0.757754	0.76373	0.781544
30.95	0.715427	0.706946	0.736722	0.771731	0.746269	0.732921	0.770951	0.796794	0.693835	0.744203	0.695603	0.699041	0.739595	0.755027	0.759104	0.782395
31.05	0.718347	0.713575	0.73323	0.768055	0.747198	0.733833	0.770371	0.796347	0.690034	0.736107	0.693456	0.693449	0.739664	0.75727	0.756573	0.781054
31.15	0.722429	0.709008	0.730708	0.766789	0.744476	0.73516	0.767505	0.79362	0.688325	0.739499	0.698511	0.696673	0.734479	0.754742	0.758929	0.779664
31.25	0.717713	0.709067	0.734559	0.76875	0.744294	0.730911	0.762686	0.790952	0.688754	0.737639	0.692987	0.694318	0.739348	0.75415	0.756886	0.775297
31.35	0.71522	0.70737	0.733843	0.764135	0.742515	0.7308	0.763179	0.789112	0.684795	0.737349	0.6924	0.693675	0.735231	0.752434	0.755734	0.775035
31.45	0.71333	0.704384	0.734986	0.766014	0.743906	0.730357	0.762123	0.792427	0.686405	0.735895	0.692784	0.694469	0.73577	0.74634	0.752764	0.776317
31.55	0.716464	0.707471	0.731927	0.764102	0.739098	0.728889	0.764821	0.790408	0.684493	0.735473	0.691307	0.691686	0.728846	0.748569	0.757664	0.772655
31.65	0.715849	0.702838	0.72978	0.76114	0.741146	0.726706	0.762415	0.791537	0.682363	0.73035	0.691335	0.68685	0.733006	0.748065	0.752592	0.774514
31.75	0.712625	0.705289	0.730871	0.761666	0.739218	0.727399	0.765924	0.790884	0.687173	0.729806	0.685773	0.68915	0.729179	0.74786	0.753438	0.771712
31.85	0.712182	0.705004	0.730088	0.759502	0.74215	0.727866	0.761673	0.787889	0.681908	0.733423	0.686815	0.689688	0.730046	0.748037	0.752541	0.769214
31.95	0.711836	0.704881	0.730562	0.760961	0.73828	0.723598	0.759236	0.786236	0.682078	0.729735	0.687159	0.6864	0.729591	0.744841	0.749326	0.765283
32.05	0.711548	0.701323	0.727553	0.760607	0.7366	0.723308	0.758882	0.785032	0.682453	0.732921	0.684505	0.686143	0.724453	0.744697	0.749635	0.769033
32.15	0.707217	0.702588	0.728938	0.757789	0.734055	0.723541	0.761076	0.784412	0.686824	0.731684	0.682896	0.685226	0.727482	0.746552	0.746173	0.762382
32.25	0.709623	0.701207	0.728224	0.758442	0.733635	0.721762	0.758894	0.781165	0.679401	0.727986	0.685151	0.683636	0.728278	0.744129	0.746573	0.767088
32.35	0.704134	0.70519	0.729454	0.756307	0.734469	0.723179	0.757933	0.781608	0.683195	0.73064	0.682922	0.687263	0.723732	0.743545	0.745848	0.766459
32.45	0.707829	0.702918	0.726567	0.755065	0.734281	0.721743	0.756479	0.780486	0.679111	0.728224	0.680633	0.681302	0.724463	0.743474	0.744639	0.764022
32.55	0.705713	0.698396	0.722057	0.755602	0.730308	0.714362	0.759288	0.776289	0.67185	0.726181	0.684489	0.684722	0.721988	0.739788	0.741778	0.764291
32.65	0.710309	0.697102	0.725523	0.752724	0.732751	0.721984	0.750683	0.77743	0.674591	0.725368	0.681988	0.683138	0.720834	0.743184	0.741975	0.758873
32.75	0.706769	0.699086	0.718123	0.751336	0.731453	0.718741	0.754292	0.774811	0.678524	0.722109	0.680164	0.677822	0.719382	0.739428	0.741384	0.762802
32.85	0.707292	0.697639	0.725106	0.752189	0.732497	0.719879	0.757801	0.77706	0.675163	0.726341	0.676985	0.684673	0.720996	0.736348	0.739296	0.758126
32.95	0.701363	0.696185	0.720897	0.751388	0.72797	0.719391	0.751876	0.779011	0.673643	0.720183	0.678432	0.674404	0.719149	0.734627	0.739345	0.760007
33.05	0.705145	0.694771	0.719519	0.751192	0.730275	0.715738	0.750363	0.778167	0.673844	0.723343	0.678548	0.675154	0.713474	0.736249	0.736595	0.757176
33.15	0.708308	0.693772	0.718496	0.750686	0.728106	0.718757	0.746958	0.780093	0.672993	0.722059	0.677475	0.673997	0.714661	0.736572	0.736081	0.758609
33.25	0.698381	0.689732	0.715826	0.746661	0.726702	0.712958	0.748334	0.771849	0.672027	0.719799	0.676726	0.674115	0.719153	0.734816	0.735242	0.756212
33.35	0.700427	0.691549	0.719245	0.745777	0.724529	0.713994	0.742416	0.773489	0.668626	0.719076	0.67534	0.673353	0.715324	0.730883	0.737642	0.751897
33.45	0.704243	0.693147	0.715795	0.743283	0.72512	0.711819	0.748848	0.771135	0.670704	0.719295	0.672359	0.670615	0.711881	0.729862	0.73252	0.752922
33.55	0.70083	0.691349	0.717428	0.739239	0.724213	0.711435	0.747643	0.769089	0.670733	0.714176	0.6728	0.672729	0.714815	0.731611	0.731853	0.758272
33.65	0.70029	0.691215	0.71513	0.73918	0.723751	0.708805	0.749321	0.77163	0.671727	0.717796	0.675324	0.672637	0.713443	0.731653	0.730982	0.752562
33.75	0.699939	0.688799	0.713813	0.739499	0.727232	0.711103	0.741763	0.768877	0.669682	0.718977	0.673342	0.670785	0.711053	0.730586	0.734945	0.746354
33.85	0.700856	0.68956	0.717966	0.737559	0.719335	0.71312	0.74194	0.765648	0.665982	0.71896	0.671732	0.670071	0.708916	0.729362	0.730138	0.746267
33.95	0.69791	0.686706	0.711306	0.739407	0.724767	0.711178	0.741132	0.763763	0.664044	0.720063	0.670938	0.669517	0.715064	0.726916	0.728856	0.746642
34.05	0.69289	0.688234	0.710844	0.738405	0.720009	0.70979	0.740597	0.766843	0.666024	0.716599	0.66531	0.670455	0.709083	0.728736	0.726327	0.741045
34.15	0.698339	0.684074	0.706029	0.73331	0.720249	0.707214	0.736046	0.765349	0.663769	0.712616	0.669187	0.666406	0.707674	0.723407	0.727102	0.742734
34.25	0.69593	0.686878	0.707551	0.738075	0.719384	0.708218	0.736458	0.7643	0.66407	0.710337	0.666955	0.666248	0.705532	0.721449	0.72558	0.743034
34.35	0.696814	0.684781	0.708866	0.736993	0.719415	0.704646	0.736081	0.760975	0.661535	0.713921	0.666733	0.665902	0.705796	0.722446	0.724779	0.742581
34.45	0.694766	0.685818	0.714096	0.73573	0.715715	0.706587	0.735773	0.761293	0.666064	0.711329	0.66708	0.664683	0.702397	0.725274	0.724486	0.741723
34.55	0.691893	0.680315	0.707836	0.733748	0.719759	0.70621	0.737116	0.764357	0.655593	0.713822	0.664867	0.664075	0.705798	0.719752	0.722865	0.740677
34.65	0.693564	0.681364	0.71135	0.731948	0.71395	0.705751	0.734135	0.759059	0.663507	0.710245	0.664292	0.663415	0.704744	0.721715	0.721944	0.738601
34.75	0.694941	0.682672	0.706203	0.736937	0.719236	0.699626	0.735723	0.754091	0.660396	0.70995	0.661923	0.662659	0.700748	0.722653	0.717056	0.734993
34.85	0.693956	0.682667	0.706759	0.735092	0.711562	0.703771	0.731698	0.760827	0.656767	0.709512	0.663526	0.66144	0.701306	0.721675	0.719632	0.736671
34.95	0.691076	0.681696	0.707351	0.736807	0.713523	0.696868	0.734601	0.757244	0.656972	0.710566	0.660194	0.664179	0.701209	0.71394	0.719526	0.732707
35.05	0.692805	0.679156	0.708631	0.73454	0.71226	0.698796	0.734033	0.760007	0.658751	0.707398	0.663755	0.659077	0.698398	0.71275	0.716337	0.737561
35.15	0.689377	0.680329	0.706283	0.733084	0.716547	0.700071	0.733317	0.752682	0.655904	0.705821	0.658683	0.659234	0.696468	0.715392	0.716733	0.734806
35.25	0.688608	0.680709	0.702722	0.733798	0.712887	0.700543	0.730107	0.755081	0.650409	0.705685	0.659835	0.658016	0.697436	0.71509	0.71534	0.733722
35.35	0.685052	0.676933	0.705928	0.731762	0.711838	0.698393	0.730991	0.749932	0.653322	0.701139	0.658157	0.65593	0.697293	0.714317	0.713009	0.732643
35.45	0.689994	0.678295	0.700137	0.731724	0.708779	0.697055	0.730774	0.752592	0.656128	0.703382	0.656755	0.656979	0.696637	0.711152	0.713153	0.733305
35.55	0.685097	0.680129	0.703481	0.728674	0.708053	0.694467	0.727687	0.752477	0.649101	0.698125	0.656029	0.654769	0.69536	0.708591	0.713745	0.729817
35.65	0.682153	0.676707	0.701308	0.732832	0.710047	0.694542	0.724161	0.752095	0.655572	0.699937	0.654604	0.653703	0.694366	0.707801	0.712467	0.72915

## Sheet: primary data n=3
	mitochondria								mitoplasts
time (min)	0.1	0.16	0.25	0.4	0.63	1	1.58	2.5	0.1	0.16	0.25	0.4	0.63	1	1.58	2.5	PCP (µM)
0	0.052582	0.054642	0.066555	0.075402	0.085326	0.082963	0.078734	0.102233	0.025667	0.03424	0.040878	0.043411	0.040408	0.040577	0.042229	0.042709
0.37	0.066742	0.072124	0.086796	0.099438	0.118048	0.116391	0.109829	0.139316	0.03873	0.052338	0.063744	0.070159	0.066105	0.06842	0.071295	0.071844
0.47	0.087587	0.094344	0.11301	0.130774	0.158507	0.151445	0.143486	0.180829	0.056454	0.073946	0.091446	0.099086	0.097378	0.099998	0.101753	0.104584
0.57	0.110066	0.122333	0.143722	0.161225	0.196887	0.191364	0.18153	0.222539	0.075243	0.098326	0.121513	0.13199	0.132385	0.134417	0.139039	0.141883
0.67	0.135501	0.152742	0.175007	0.196199	0.235106	0.226659	0.213817	0.263946	0.095497	0.122803	0.151832	0.162527	0.165908	0.170229	0.177669	0.179493
0.77	0.164292	0.181314	0.206896	0.229462	0.277243	0.263206	0.250048	0.303935	0.118939	0.148986	0.182195	0.19725	0.200939	0.206991	0.212399	0.215438
0.87	0.19362	0.211957	0.237547	0.259635	0.315629	0.297037	0.285679	0.345855	0.141109	0.175328	0.213624	0.228155	0.236196	0.24316	0.249197	0.252241
0.97	0.221809	0.241829	0.268575	0.290062	0.349457	0.332946	0.31625	0.381749	0.164215	0.201987	0.245932	0.260611	0.273156	0.276064	0.284022	0.288888
1.07	0.250947	0.268765	0.298971	0.325101	0.385256	0.365983	0.344067	0.411907	0.188245	0.230742	0.274587	0.292906	0.305777	0.308841	0.316304	0.32275
1.17	0.27918	0.300017	0.325363	0.34874	0.417497	0.394879	0.372427	0.445026	0.211513	0.255175	0.300202	0.322511	0.339102	0.341609	0.349809	0.355073
1.27	0.304317	0.32507	0.353172	0.378474	0.446966	0.421338	0.397418	0.471718	0.23589	0.277785	0.330169	0.350356	0.366089	0.373672	0.381798	0.387314
1.37	0.33393	0.352668	0.375047	0.40625	0.475762	0.44543	0.421949	0.501082	0.25554	0.304412	0.358885	0.379263	0.392858	0.402741	0.410535	0.416834
1.47	0.359068	0.373809	0.398522	0.427657	0.503409	0.476376	0.442426	0.527308	0.280082	0.325889	0.378893	0.403755	0.424202	0.42775	0.433841	0.444559
1.57	0.38476	0.398476	0.42078	0.447284	0.523843	0.496008	0.465164	0.552287	0.301869	0.35004	0.401502	0.429594	0.444798	0.451084	0.46368	0.472669
1.67	0.407758	0.414201	0.441892	0.469835	0.55082	0.515298	0.48484	0.571572	0.32218	0.371247	0.42728	0.448916	0.470539	0.476412	0.485842	0.489454
1.77	0.429502	0.440461	0.458917	0.488763	0.578724	0.536598	0.499268	0.596031	0.342829	0.390733	0.446732	0.470924	0.493634	0.499437	0.509801	0.512968
1.87	0.453298	0.457971	0.478415	0.508026	0.594323	0.556001	0.517356	0.612614	0.363725	0.410049	0.468527	0.486585	0.513112	0.520246	0.523321	0.537579
1.97	0.475338	0.475338	0.500259	0.52037	0.616563	0.574568	0.53613	0.631715	0.380257	0.428782	0.48558	0.510839	0.533595	0.539968	0.550162	0.55631
2.07	0.495463	0.493102	0.509641	0.540672	0.634607	0.589812	0.553458	0.651527	0.401651	0.447621	0.503766	0.528829	0.549055	0.554563	0.567033	0.575706
2.17	0.515586	0.509649	0.529844	0.55836	0.652046	0.607525	0.566694	0.669841	0.418964	0.466531	0.518407	0.542268	0.568615	0.573155	0.5849	0.596635
2.27	0.532845	0.523283	0.545764	0.570038	0.664731	0.622875	0.573476	0.685037	0.437242	0.481598	0.539822	0.561861	0.584903	0.591728	0.600072	0.612815
2.37	0.553653	0.538316	0.552207	0.586845	0.681864	0.633022	0.594287	0.700425	0.449661	0.493971	0.554144	0.581887	0.602816	0.609069	0.61822	0.628514
2.47	0.570031	0.553838	0.5685	0.597116	0.698452	0.647558	0.600247	0.713342	0.469737	0.509122	0.569412	0.590457	0.614497	0.622163	0.632051	0.641567
2.57	0.588818	0.568787	0.581899	0.606965	0.713391	0.661767	0.616517	0.727219	0.486189	0.525323	0.580471	0.606988	0.629092	0.635247	0.645847	0.659963
2.67	0.604458	0.579192	0.594408	0.624188	0.724365	0.67288	0.626921	0.737084	0.497572	0.537168	0.595759	0.617208	0.645328	0.649469	0.658573	0.674876
2.77	0.617413	0.593396	0.60642	0.636806	0.738066	0.683626	0.639717	0.751535	0.513382	0.552045	0.60901	0.631643	0.657381	0.663794	0.673797	0.686884
2.87	0.633359	0.604666	0.62085	0.649061	0.749649	0.691952	0.64773	0.763874	0.524552	0.560274	0.619725	0.639825	0.669587	0.674108	0.683246	0.702133
2.97	0.653238	0.614901	0.625469	0.657626	0.760192	0.708366	0.656814	0.772973	0.538828	0.577375	0.634546	0.654476	0.681453	0.685032	0.696476	0.715754
3.07	0.662638	0.620632	0.635401	0.666717	0.770818	0.715708	0.663529	0.788636	0.554424	0.586408	0.64281	0.669785	0.694665	0.698855	0.704597	0.727726
3.17	0.680741	0.63199	0.641461	0.675115	0.785004	0.722703	0.675475	0.798044	0.565905	0.594182	0.650109	0.676572	0.702478	0.708209	0.715284	0.73339
3.27	0.691739	0.647041	0.65119	0.679783	0.787264	0.733686	0.682349	0.806794	0.57626	0.604553	0.663747	0.682285	0.714662	0.721527	0.727502	0.745423
3.37	0.700489	0.651912	0.66561	0.693088	0.800122	0.741421	0.692389	0.816751	0.586583	0.616355	0.669304	0.696361	0.724376	0.727248	0.737565	0.754728
3.47	0.712473	0.65808	0.671516	0.69987	0.809815	0.748455	0.697083	0.825034	0.596979	0.627049	0.678398	0.707294	0.733167	0.742335	0.74904	0.766497
3.57	0.727541	0.674494	0.676014	0.706865	0.815713	0.759805	0.699518	0.833547	0.607186	0.634841	0.692687	0.719189	0.743471	0.745601	0.760288	0.77742
3.67	0.733624	0.679883	0.687215	0.710724	0.823973	0.761366	0.712702	0.837997	0.620033	0.642453	0.701339	0.723654	0.752152	0.754027	0.768264	0.784238
3.77	0.745588	0.68471	0.692877	0.724178	0.830516	0.769112	0.716815	0.845416	0.629819	0.653276	0.713943	0.734081	0.757634	0.763288	0.776177	0.793782
3.87	0.758374	0.694378	0.696142	0.731687	0.841046	0.773459	0.72017	0.855471	0.635476	0.660313	0.720129	0.743407	0.771576	0.76912	0.781261	0.803238
3.97	0.769924	0.699521	0.704335	0.73535	0.844648	0.787555	0.726467	0.86464	0.648472	0.669425	0.72316	0.751453	0.778628	0.778969	0.791842	0.811493
4.07	0.77827	0.704386	0.7127	0.7451	0.849419	0.788641	0.728096	0.867669	0.657207	0.676695	0.73172	0.757256	0.778753	0.786568	0.798247	0.820261
4.17	0.784603	0.713953	0.716599	0.752465	0.859856	0.793065	0.73916	0.880421	0.664657	0.683187	0.738551	0.764164	0.790391	0.789494	0.800538	0.826218
4.27	0.793525	0.715821	0.722274	0.753873	0.861223	0.799953	0.7398	0.879468	0.677484	0.692577	0.747186	0.768919	0.799393	0.801579	0.813838	0.836304
4.37	0.798067	0.727363	0.724311	0.75825	0.86911	0.803349	0.75267	0.889035	0.682889	0.69988	0.756976	0.775213	0.804071	0.804615	0.817065	0.841817
4.47	0.807279	0.729478	0.73272	0.765662	0.871345	0.809394	0.750633	0.896082	0.688171	0.70311	0.760788	0.783239	0.810393	0.813455	0.826706	0.846171
4.57	0.815069	0.733257	0.73479	0.767732	0.881641	0.810031	0.760013	0.901674	0.696009	0.712026	0.768673	0.790314	0.814873	0.816751	0.829224	0.859957
4.67	0.822611	0.741131	0.740452	0.775201	0.883712	0.817049	0.761426	0.903966	0.699171	0.718228	0.767951	0.794504	0.821589	0.822203	0.838066	0.863533
4.77	0.829452	0.74603	0.741614	0.770954	0.886435	0.813684	0.765171	0.908053	0.71103	0.725431	0.779522	0.802799	0.823289	0.829047	0.841858	0.86334
4.87	0.839978	0.751776	0.746708	0.780541	0.894443	0.827698	0.769916	0.910183	0.716979	0.729298	0.785754	0.8084	0.83514	0.835744	0.850641	0.870479
4.97	0.841506	0.749231	0.751964	0.785017	0.895039	0.82695	0.773551	0.916063	0.726744	0.740481	0.785613	0.811942	0.83914	0.840394	0.849157	0.88271
5.07	0.849681	0.751345	0.754936	0.782851	0.898548	0.830814	0.772213	0.920639	0.732021	0.74231	0.793307	0.816636	0.838606	0.842256	0.859129	0.884514
5.17	0.855117	0.758515	0.758682	0.786347	0.903907	0.836245	0.77759	0.924202	0.735571	0.743471	0.799429	0.820641	0.843135	0.849172	0.862266	0.88849
5.27	0.865287	0.762566	0.759781	0.789507	0.903057	0.835094	0.778733	0.930064	0.742117	0.74874	0.804073	0.825185	0.852419	0.854372	0.870122	0.894977
5.37	0.864537	0.76792	0.761454	0.79212	0.910974	0.836921	0.787342	0.933949	0.747276	0.757988	0.807801	0.829445	0.854767	0.858325	0.868573	0.896924
5.47	0.872933	0.773212	0.764565	0.799973	0.911868	0.842821	0.786319	0.932546	0.755692	0.759301	0.814701	0.834852	0.858017	0.862847	0.876277	0.899075
5.57	0.880509	0.772267	0.769978	0.798748	0.911223	0.849532	0.790396	0.933486	0.76188	0.764521	0.817424	0.835138	0.864581	0.86297	0.881405	0.907617
5.67	0.878402	0.77287	0.772372	0.806144	0.915884	0.845259	0.789325	0.936713	0.767157	0.772922	0.821103	0.845272	0.870502	0.869205	0.883142	0.911133
5.77	0.88737	0.778178	0.770037	0.800795	0.920515	0.847674	0.79231	0.94061	0.771386	0.775365	0.821337	0.843872	0.869593	0.869387	0.883355	0.911198
5.87	0.88867	0.7858	0.775414	0.806517	0.916847	0.848106	0.793972	0.947325	0.776061	0.779963	0.82657	0.849568	0.868085	0.878764	0.887334	0.918694
5.97	0.89323	0.785292	0.779069	0.808024	0.920829	0.851926	0.795382	0.947325	0.780228	0.784207	0.831754	0.852286	0.876208	0.880467	0.895203	0.92358
6.07	0.89498	0.784685	0.779527	0.806429	0.925402	0.854498	0.80179	0.950742	0.787067	0.784261	0.832114	0.853632	0.880871	0.881934	0.891989	0.925574
6.17	0.901921	0.787288	0.776475	0.812623	0.928053	0.853637	0.798563	0.951731	0.792487	0.789394	0.834547	0.857637	0.881395	0.885929	0.898761	0.92728
6.27	0.908716	0.786347	0.782789	0.810326	0.927151	0.857246	0.801242	0.95716	0.796487	0.794771	0.844114	0.859499	0.885919	0.888678	0.902489	0.928903
6.37	0.904097	0.794147	0.784968	0.810894	0.925882	0.860106	0.802267	0.957391	0.799007	0.793407	0.843602	0.866484	0.888709	0.891023	0.903701	0.936402
6.47	0.908292	0.793042	0.781703	0.816381	0.93476	0.860732	0.802203	0.951143	0.804258	0.804073	0.846007	0.866364	0.894913	0.893485	0.908249	0.939205
6.57	0.917016	0.796592	0.785356	0.818809	0.931621	0.86184	0.803131	0.956897	0.804608	0.804225	0.85535	0.868057	0.898548	0.89983	0.910633	0.944941
6.67	0.917243	0.798463	0.784657	0.816014	0.934809	0.860429	0.807873	0.961054	0.811996	0.806681	0.857457	0.873526	0.895095	0.89594	0.914108	0.944816
6.77	0.920831	0.796718	0.786042	0.818812	0.937715	0.86585	0.80748	0.962906	0.812315	0.809515	0.852977	0.874566	0.896233	0.900154	0.91474	0.950403
6.87	0.92069	0.801494	0.790792	0.816754	0.935904	0.863114	0.808667	0.965257	0.815965	0.813951	0.860283	0.881182	0.901998	0.90531	0.91742	0.951672
6.97	0.920146	0.804305	0.785998	0.820777	0.937522	0.868894	0.810188	0.964756	0.818527	0.814044	0.860129	0.882076	0.901382	0.907827	0.919567	0.950496
7.07	0.929895	0.800366	0.787244	0.823544	0.938609	0.86084	0.812793	0.965576	0.8219	0.824196	0.860948	0.882024	0.904238	0.905045	0.924754	0.952671
7.17	0.928813	0.800747	0.789666	0.819996	0.938948	0.865254	0.811285	0.968741	0.825658	0.823855	0.863492	0.885066	0.911169	0.908107	0.922098	0.953234
7.27	0.936895	0.801967	0.791061	0.818396	0.933317	0.867355	0.809915	0.967217	0.829211	0.824286	0.870464	0.881205	0.907853	0.913343	0.921972	0.959644
7.37	0.937281	0.807074	0.793186	0.824779	0.939225	0.868779	0.8138	0.97058	0.834305	0.82441	0.87171	0.890253	0.911658	0.907098	0.925109	0.960134
7.47	0.941286	0.808266	0.793628	0.821173	0.938897	0.864527	0.815061	0.969599	0.836245	0.828674	0.87404	0.890299	0.914026	0.91164	0.926599	0.967646
7.57	0.942534	0.808464	0.791498	0.824666	0.939467	0.868157	0.810776	0.975487	0.840964	0.831282	0.872265	0.888863	0.915493	0.913638	0.932464	0.966893
7.67	0.941905	0.808926	0.792274	0.827962	0.940176	0.86531	0.812507	0.969188	0.838942	0.834357	0.874423	0.891334	0.915873	0.917569	0.933661	0.963238
7.77	0.945034	0.809748	0.797736	0.828808	0.937365	0.867772	0.816939	0.971256	0.844142	0.834965	0.876537	0.89554	0.915316	0.917877	0.937666	0.97096
7.87	0.945332	0.808569	0.796336	0.820366	0.942948	0.865169	0.818886	0.970714	0.84509	0.840073	0.878284	0.896809	0.919516	0.920315	0.936818	0.975384
7.97	0.948204	0.807801	0.797569	0.825519	0.943749	0.867764	0.817216	0.972928	0.846398	0.840327	0.883959	0.897482	0.920187	0.924187	0.93661	0.969835
8.07	0.955919	0.808924	0.795385	0.825491	0.93838	0.866238	0.811616	0.972532	0.84975	0.843682	0.882872	0.898283	0.920492	0.922517	0.941543	0.97282
8.17	0.95176	0.812608	0.794699	0.826298	0.941371	0.865873	0.816029	0.973205	0.856391	0.845832	0.882404	0.904976	0.926244	0.921903	0.940022	0.973866
8.27	0.956001	0.812942	0.796461	0.829771	0.936322	0.867715	0.813037	0.97534	0.851492	0.848363	0.886659	0.896703	0.921111	0.929782	0.937663	0.977889
8.37	0.958729	0.811816	0.795732	0.826842	0.943778	0.867951	0.813985	0.972756	0.858726	0.844031	0.887599	0.906098	0.922396	0.932323	0.93978	0.97794
8.47	0.96314	0.807436	0.797469	0.824183	0.941545	0.871103	0.812962	0.977981	0.859461	0.850238	0.892878	0.907796	0.926406	0.930691	0.94779	0.981678
8.57	0.96202	0.811423	0.792179	0.827277	0.943081	0.867651	0.814039	0.975476	0.85981	0.846272	0.891052	0.904935	0.923858	0.924765	0.947459	0.980925
8.67	0.961691	0.814367	0.79204	0.824962	0.939577	0.871571	0.816497	0.975387	0.862806	0.848725	0.893425	0.902692	0.926766	0.928256	0.942927	0.983666
8.77	0.961666	0.816846	0.796688	0.82397	0.939824	0.868103	0.815978	0.97671	0.863422	0.849814	0.888072	0.907596	0.924413	0.926059	0.941499	0.985077
8.87	0.959156	0.815236	0.791735	0.827359	0.943266	0.86745	0.81512	0.976815	0.867787	0.852548	0.895948	0.90421	0.925964	0.930717	0.944112	0.981711
8.97	0.961989	0.811338	0.794709	0.830156	0.939392	0.866132	0.815916	0.978097	0.867032	0.852923	0.894897	0.912058	0.925283	0.927113	0.94897	0.983032
9.07	0.960386	0.817612	0.793803	0.827097	0.942891	0.86222	0.817016	0.97764	0.87274	0.85822	0.896948	0.90857	0.931783	0.937121	0.948723	0.981737
9.17	0.961144	0.814619	0.796788	0.827472	0.939731	0.86622	0.814331	0.980119	0.874867	0.85413	0.896074	0.906967	0.927179	0.93576	0.951973	0.98399
9.27	0.960856	0.817743	0.798586	0.824808	0.94006	0.869233	0.814236	0.976728	0.871879	0.860334	0.895298	0.907355	0.934868	0.936256	0.951259	0.982539
9.37	0.959505	0.811197	0.793535	0.823641	0.939351	0.867024	0.816692	0.982053	0.873421	0.860088	0.894006	0.911596	0.934691	0.941504	0.946758	0.982171
9.47	0.958655	0.809612	0.797129	0.826984	0.939012	0.86752	0.813507	0.975795	0.874292	0.863507	0.897654	0.914288	0.935354	0.936613	0.951189	0.989632
9.57	0.96045	0.814583	0.798522	0.826403	0.93698	0.862587	0.817427	0.978528	0.878913	0.865367	0.89964	0.911889	0.934206	0.934802	0.950984	0.983327
9.67	0.960466	0.809995	0.79493	0.827654	0.939814	0.869996	0.812767	0.973524	0.880277	0.862374	0.899391	0.915298	0.926553	0.934344	0.950927	0.989927
9.77	0.956402	0.810121	0.790024	0.822758	0.933967	0.86894	0.815603	0.980327	0.879211	0.863232	0.898178	0.914306	0.933255	0.935084	0.955112	0.9934
9.87	0.960992	0.809766	0.792706	0.82442	0.940122	0.868195	0.81941	0.975238	0.882029	0.865924	0.900793	0.915524	0.934807	0.935734	0.946896	0.989161
9.97	0.956748	0.812769	0.793438	0.822465	0.936251	0.864157	0.811475	0.972445	0.881778	0.867956	0.896711	0.916718	0.932001	0.938062	0.952068	0.991476
10.07	0.958547	0.809646	0.796402	0.823336	0.936387	0.868152	0.817594	0.973141	0.881688	0.865955	0.902353	0.911614	0.938018	0.938619	0.953681	0.987897
10.17	0.962724	0.808328	0.795192	0.820112	0.938956	0.867119	0.811855	0.973817	0.884758	0.867474	0.899938	0.914997	0.93596	0.936741	0.952245	0.984167
10.27	0.957758	0.812646	0.794111	0.821563	0.936333	0.870135	0.812256	0.970981	0.881873	0.864745	0.904824	0.91547	0.935693	0.934344	0.953953	0.98798
10.37	0.955014	0.807804	0.793088	0.824733	0.940078	0.862944	0.812492	0.970315	0.888228	0.86809	0.903319	0.913882	0.937787	0.93837	0.950061	0.990595
10.47	0.948253	0.811559	0.795293	0.823811	0.935896	0.868475	0.812739	0.966274	0.885004	0.86865	0.904195	0.916189	0.935028	0.938226	0.950298	0.990926
10.57	0.953152	0.806093	0.79072	0.822085	0.93474	0.861914	0.816461	0.970685	0.884776	0.869166	0.905847	0.913615	0.938419	0.9408	0.955775	1
10.67	0.952427	0.805271	0.791431	0.817519	0.934874	0.86202	0.812379	0.96892	0.885069	0.867101	0.9001	0.916359	0.937653	0.940443	0.953874	0.990777
10.77	0.955179	0.803909	0.78774	0.815855	0.933183	0.862775	0.80759	0.969902	0.886487	0.867879	0.903809	0.918003	0.934129	0.939431	0.956468	0.994993
10.87	0.957437	0.803416	0.788385	0.816322	0.935421	0.860591	0.811154	0.970302	0.884357	0.870775	0.905584	0.915064	0.939749	0.939803	0.952949	0.989125
10.97	0.961188	0.802789	0.792063	0.821334	0.935744	0.862947	0.810871	0.97105	0.887018	0.872902	0.903545	0.917489	0.937548	0.93801	0.953707	0.989367
11.07	0.964836	0.809157	0.78953	0.814593	0.935356	0.861372	0.805995	0.971885	0.888375	0.867869	0.899206	0.919588	0.9354	0.93707	0.956918	0.994356
11.17	0.956186	0.803292	0.784562	0.813622	0.930206	0.856879	0.810432	0.968566	0.887676	0.870736	0.908554	0.913266	0.937522	0.939945	0.953391	0.997346
11.27	0.959233	0.800269	0.789058	0.815801	0.931154	0.860452	0.809687	0.969483	0.889575	0.873146	0.903391	0.91872	0.940035	0.935708	0.953278	0.990567
11.37	0.955693	0.806193	0.784061	0.812564	0.932788	0.857472	0.807123	0.970662	0.887041	0.874361	0.909561	0.914558	0.935634	0.936921	0.954174	0.989855
11.47	0.955271	0.799775	0.783426	0.811667	0.929178	0.859189	0.80815	0.965576	0.884781	0.873883	0.903265	0.918748	0.934015	0.940831	0.952314	0.995527
11.57	0.953388	0.800513	0.785312	0.813609	0.924112	0.860345	0.807097	0.965339	0.892508	0.875378	0.9071	0.914414	0.935768	0.941599	0.9529	0.989321
11.67	0.950642	0.80359	0.783501	0.812674	0.919159	0.857454	0.806432	0.9637	0.889495	0.869737	0.905161	0.911498	0.937669	0.945912	0.954375	0.991209
11.77	0.949984	0.802347	0.783573	0.814938	0.924176	0.856594	0.805926	0.965881	0.892303	0.87545	0.904827	0.913805	0.936795	0.93315	0.954508	0.992442
11.87	0.947621	0.800166	0.78365	0.810427	0.922915	0.854235	0.804947	0.961231	0.888311	0.875299	0.905633	0.914078	0.938439	0.939631	0.951598	0.991235
11.97	0.949445	0.799495	0.782805	0.810162	0.922023	0.8556	0.809052	0.963325	0.88968	0.873552	0.908976	0.911128	0.933561	0.936102	0.95057	0.992486
12.07	0.945879	0.796202	0.783555	0.809743	0.922635	0.855361	0.799038	0.965198	0.890371	0.873297	0.903439	0.913846	0.93696	0.940186	0.953391	0.990061
12.17	0.951698	0.798661	0.777764	0.809933	0.922088	0.850991	0.798763	0.960271	0.888462	0.872393	0.907714	0.916983	0.934496	0.937314	0.950999	0.989107
12.27	0.952171	0.801448	0.781315	0.802858	0.921838	0.850703	0.801278	0.966179	0.889492	0.870662	0.902024	0.914463	0.933679	0.936898	0.952731	0.992046
12.37	0.950218	0.79474	0.776295	0.804518	0.918232	0.853339	0.801905	0.963358	0.891427	0.874384	0.911331	0.915521	0.934432	0.935863	0.951649	0.992735
12.47	0.952189	0.794786	0.775121	0.801766	0.920891	0.854523	0.800654	0.959382	0.89322	0.879155	0.901492	0.912816	0.932294	0.937476	0.951539	0.989231
12.57	0.948851	0.794825	0.776994	0.806293	0.918465	0.854071	0.797471	0.962413	0.893063	0.875997	0.905862	0.910422	0.92877	0.934958	0.951544	0.99181
12.67	0.943875	0.795881	0.77416	0.799958	0.920762	0.851273	0.798003	0.957617	0.888968	0.869128	0.905495	0.914155	0.930278	0.933448	0.951613	0.982806
12.77	0.947798	0.790026	0.77239	0.796924	0.922054	0.845825	0.798044	0.952358	0.88753	0.87133	0.903439	0.913541	0.932276	0.93336	0.949293	0.983443
12.87	0.94209	0.791318	0.769739	0.801548	0.916066	0.846359	0.799339	0.951279	0.892624	0.872054	0.906306	0.915275	0.931359	0.933355	0.949915	0.986415
12.97	0.939549	0.793227	0.770651	0.799942	0.917718	0.850963	0.797181	0.958513	0.88663	0.872036	0.899673	0.909158	0.932919	0.936677	0.953298	0.984689
13.07	0.937365	0.789022	0.770751	0.793926	0.915771	0.84081	0.7979	0.952566	0.89303	0.873572	0.906895	0.912405	0.931071	0.934247	0.945712	0.986091
13.17	0.934791	0.788374	0.771686	0.793453	0.915231	0.845028	0.794234	0.955333	0.894777	0.869863	0.904372	0.912146	0.933425	0.936235	0.945586	0.989788
13.27	0.941638	0.785677	0.766512	0.793458	0.912431	0.840926	0.800215	0.950403	0.888634	0.868057	0.902019	0.912251	0.931364	0.930144	0.944386	0.983754
13.37	0.936936	0.786501	0.770633	0.794031	0.908089	0.842295	0.794193	0.947569	0.889944	0.867628	0.903041	0.908788	0.936091	0.932109	0.945543	0.986623
13.47	0.936376	0.785271	0.767193	0.793034	0.911514	0.845457	0.793803	0.953368	0.893076	0.867944	0.896493	0.911483	0.929021	0.928759	0.946246	0.987206
13.57	0.937031	0.782509	0.770152	0.793176	0.906895	0.838752	0.791781	0.948505	0.890864	0.870615	0.902974	0.912868	0.926404	0.930437	0.948546	0.981537
13.67	0.938501	0.780593	0.76533	0.793096	0.907085	0.839698	0.791128	0.949	0.886674	0.868087	0.900593	0.908133	0.92775	0.929818	0.945969	0.984399
13.77	0.94472	0.783172	0.766291	0.793448	0.910422	0.844818	0.788942	0.948361	0.893962	0.871335	0.902646	0.910139	0.926021	0.929712	0.945787	0.984203
13.87	0.942552	0.780118	0.76411	0.794224	0.905882	0.838626	0.790383	0.9461	0.890227	0.867694	0.894977	0.904806	0.926496	0.925001	0.950377	0.980504
13.97	0.93215	0.780151	0.764051	0.787033	0.905659	0.839692	0.790591	0.946136	0.886458	0.868856	0.901204	0.911776	0.930306	0.930501	0.94292	0.979186
14.07	0.930892	0.783966	0.758736	0.78822	0.903853	0.836412	0.787575	0.943472	0.888249	0.870487	0.896102	0.903676	0.926979	0.931416	0.94657	0.976766
14.17	0.930203	0.780839	0.760146	0.788765	0.906592	0.833848	0.787763	0.942288	0.889908	0.869128	0.897307	0.909009	0.925389	0.926458	0.947793	0.980378
14.27	0.930535	0.777276	0.762456	0.785505	0.902258	0.832435	0.788629	0.940826	0.890818	0.863489	0.898807	0.903059	0.923269	0.925751	0.945522	0.978986
14.37	0.9315	0.780107	0.758068	0.784356	0.900387	0.836522	0.789934	0.937753	0.885595	0.869927	0.900269	0.906877	0.923549	0.926283	0.943194	0.97693
14.47	0.93122	0.776513	0.755743	0.782687	0.900485	0.833144	0.782889	0.938891	0.889726	0.860691	0.896205	0.90597	0.922219	0.926658	0.937155	0.976072
14.57	0.934501	0.776493	0.757382	0.784284	0.904613	0.834927	0.786625	0.939785	0.88725	0.867145	0.898294	0.90646	0.920867	0.921271	0.940078	0.9743
14.67	0.929682	0.780999	0.75591	0.783881	0.896513	0.831094	0.783879	0.936361	0.887234	0.865339	0.894456	0.901253	0.926134	0.922465	0.94201	0.976016
14.77	0.929805	0.772614	0.753564	0.779511	0.895758	0.832432	0.784058	0.937363	0.884991	0.867265	0.891	0.902065	0.922232	0.92765	0.940232	0.97719
14.87	0.930239	0.775612	0.754351	0.775383	0.893903	0.829732	0.782471	0.935053	0.885806	0.864165	0.896387	0.899576	0.919177	0.923822	0.936636	0.972144
14.97	0.929312	0.774689	0.75264	0.779832	0.894623	0.828474	0.78579	0.934175	0.885274	0.865701	0.891704	0.906669	0.91854	0.923498	0.939413	0.975327
15.07	0.927334	0.77155	0.749608	0.779062	0.88939	0.825481	0.780855	0.934717	0.883758	0.860676	0.886664	0.900115	0.921913	0.919198	0.938416	0.970338
15.17	0.926946	0.766466	0.747586	0.777191	0.888159	0.828135	0.782206	0.933787	0.884408	0.870875	0.890887	0.90134	0.916518	0.91854	0.938239	0.972371
15.27	0.922059	0.772524	0.745025	0.779689	0.890818	0.828713	0.781656	0.934278	0.883504	0.860501	0.893469	0.900524	0.91893	0.917176	0.93726	0.96993
15.37	0.92005	0.769266	0.746808	0.773749	0.891645	0.822971	0.778024	0.927316	0.883756	0.862944	0.88736	0.89955	0.919981	0.922368	0.932207	0.970477
15.47	0.91828	0.772521	0.745516	0.774933	0.886317	0.823158	0.77742	0.924562	0.882196	0.861662	0.890332	0.898491	0.915657	0.91881	0.936551	0.968363
15.57	0.917063	0.764678	0.746595	0.769708	0.885107	0.820148	0.776423	0.933902	0.879722	0.86233	0.886982	0.899745	0.919031	0.91388	0.935228	0.967053
15.67	0.915938	0.762872	0.745968	0.772488	0.888372	0.818532	0.775396	0.927277	0.882828	0.863563	0.889734	0.899506	0.920092	0.911424	0.935426	0.968574
15.77	0.915308	0.76234	0.742348	0.773538	0.882294	0.819837	0.775239	0.926717	0.882751	0.85821	0.886777	0.897135	0.917666	0.919562	0.930588	0.963659
15.87	0.912675	0.758857	0.741131	0.766725	0.884609	0.817607	0.770507	0.926303	0.8812	0.859566	0.88411	0.898682	0.920487	0.914933	0.927878	0.959839
15.97	0.919955	0.759815	0.742356	0.765957	0.884455	0.822359	0.771763	0.922496	0.884162	0.854757	0.891044	0.894389	0.916122	0.914368	0.930113	0.96641
16.07	0.921273	0.760637	0.741732	0.765592	0.882841	0.817889	0.76856	0.925206	0.88188	0.85933	0.886078	0.897076	0.913669	0.913006	0.928641	0.959202
16.17	0.914029	0.757821	0.741508	0.766453	0.881978	0.816877	0.764976	0.921399	0.882312	0.860108	0.88456	0.893148	0.916855	0.9177	0.925962	0.959957
16.27	0.918584	0.754078	0.736136	0.765176	0.878209	0.815403	0.768308	0.923907	0.880221	0.856111	0.885754	0.897171	0.912667	0.912806	0.929702	0.963171
16.37	0.91809	0.757164	0.738053	0.766877	0.878592	0.817144	0.764257	0.920156	0.881811	0.860935	0.882176	0.891884	0.908778	0.911986	0.927683	0.961663
16.47	0.919711	0.756033	0.735227	0.762636	0.876262	0.817242	0.763648	0.917201	0.875443	0.853886	0.882826	0.895604	0.910442	0.906915	0.925155	0.961601
16.57	0.914481	0.751946	0.738135	0.760806	0.875602	0.809103	0.760997	0.915064	0.876185	0.858246	0.881436	0.888434	0.905315	0.909862	0.928248	0.958249
16.67	0.916015	0.752421	0.733878	0.760223	0.878294	0.813404	0.763874	0.913471	0.879129	0.857794	0.878656	0.891478	0.907997	0.912069	0.921492	0.954015
16.77	0.926031	0.752036	0.733046	0.765662	0.875096	0.812042	0.760465	0.916182	0.875103	0.854287	0.880509	0.891483	0.9054	0.906088	0.92609	0.956856
16.87	0.911943	0.747052	0.737087	0.757035	0.871707	0.811747	0.759427	0.916269	0.881382	0.857149	0.878065	0.88911	0.906959	0.904074	0.921856	0.953586
16.97	0.917633	0.74846	0.732779	0.758353	0.87601	0.810419	0.758153	0.914219	0.87415	0.853038	0.878258	0.889194	0.904454	0.910219	0.922766	0.955985
17.07	0.917587	0.746967	0.731461	0.754556	0.870299	0.809512	0.75935	0.906723	0.874818	0.857295	0.881012	0.885266	0.907599	0.900367	0.919865	0.948163
17.17	0.915028	0.749156	0.726693	0.75729	0.868167	0.810771	0.760151	0.90812	0.871314	0.852761	0.879537	0.886407	0.901877	0.908087	0.917564	0.950421
17.27	0.908462	0.749978	0.72678	0.754369	0.864779	0.80396	0.756953	0.906291	0.873395	0.852096	0.874767	0.8854	0.902335	0.901428	0.914648	0.948877
17.37	0.905918	0.746276	0.726757	0.752573	0.866567	0.807246	0.75376	0.912724	0.866734	0.848186	0.877367	0.883178	0.903624	0.89901	0.913841	0.951438
17.47	0.912426	0.748462	0.727397	0.752915	0.865362	0.807837	0.750757	0.905523	0.875931	0.855389	0.87498	0.881775	0.900166	0.902417	0.915699	0.947477
17.57	0.913153	0.741524	0.723659	0.748167	0.861711	0.800112	0.758132	0.905253	0.868434	0.853259	0.870826	0.889374	0.899696	0.905132	0.91371	0.948553
17.67	0.911647	0.741932	0.727291	0.751106	0.864581	0.798699	0.75304	0.906039	0.871129	0.84901	0.873475	0.883283	0.897317	0.89926	0.916092	0.946917
17.77	0.915696	0.738932	0.722205	0.749726	0.863674	0.799388	0.752773	0.904685	0.870179	0.845881	0.870551	0.88298	0.894612	0.898992	0.91138	0.942622
17.87	0.911177	0.742279	0.721223	0.743992	0.864283	0.796459	0.748326	0.900521	0.868439	0.847677	0.866998	0.882099	0.894337	0.895401	0.913299	0.94573
17.97	0.91213	0.739027	0.721992	0.744416	0.861449	0.802856	0.750538	0.898466	0.865714	0.845442	0.868874	0.879817	0.895817	0.89555	0.915221	0.945535
18.07	0.913664	0.743684	0.721262	0.745195	0.85775	0.799272	0.750207	0.899563	0.865043	0.844913	0.872334	0.88102	0.897112	0.894864	0.913921	0.944284
18.17	0.910764	0.743055	0.71905	0.743851	0.862479	0.795716	0.746777	0.897615	0.862325	0.846991	0.868432	0.879895	0.895653	0.895429	0.909199	0.945255
18.27	0.906288	0.735695	0.715587	0.742107	0.854739	0.796443	0.745878	0.893032	0.869755	0.846415	0.868355	0.879293	0.896012	0.8924	0.905847	0.942979
18.37	0.905798	0.736994	0.716093	0.740553	0.854541	0.795981	0.744342	0.894237	0.86528	0.845054	0.865354	0.875913	0.894075	0.895419	0.902584	0.942565
18.47	0.904285	0.733837	0.716504	0.739633	0.853863	0.792482	0.743969	0.891581	0.861948	0.841208	0.867096	0.874194	0.891232	0.889605	0.90924	0.937265
18.57	0.904082	0.735448	0.715603	0.74026	0.851325	0.793327	0.746171	0.894599	0.86587	0.84128	0.86008	0.877582	0.891756	0.888344	0.90804	0.938897
18.67	0.903814	0.731589	0.714482	0.739843	0.851677	0.794699	0.74065	0.891722	0.861917	0.843066	0.86613	0.8747	0.891468	0.890309	0.904911	0.938881
18.77	0.908791	0.730775	0.710007	0.737295	0.846703	0.78811	0.740922	0.890132	0.861616	0.840422	0.861827	0.876462	0.88476	0.890728	0.903856	0.936312
18.87	0.906016	0.73133	0.70929	0.735605	0.850277	0.783866	0.743289	0.894846	0.861462	0.837447	0.865082	0.876244	0.888126	0.88961	0.903051	0.93864
18.97	0.902348	0.731127	0.705023	0.738071	0.844848	0.790298	0.736136	0.890194	0.864211	0.839148	0.860059	0.870382	0.885534	0.886415	0.902694	0.93353
19.07	0.902419	0.725046	0.709324	0.732355	0.845439	0.788708	0.737583	0.887201	0.860861	0.836877	0.855895	0.869914	0.8879	0.88615	0.901412	0.931657
19.17	0.898538	0.724275	0.708212	0.73498	0.847425	0.789934	0.736735	0.889659	0.863127	0.83756	0.860036	0.871029	0.885174	0.885377	0.899992	0.93586
19.27	0.89871	0.72427	0.706544	0.734736	0.841409	0.785356	0.735754	0.884973	0.86009	0.834822	0.858117	0.87163	0.885875	0.882731	0.897533	0.930332
19.37	0.896955	0.729162	0.705309	0.729169	0.843872	0.785268	0.737393	0.88328	0.858621	0.835194	0.857318	0.866854	0.881698	0.883394	0.896341	0.93233
19.47	0.896066	0.723952	0.702812	0.732124	0.841229	0.784827	0.734325	0.881968	0.86128	0.83682	0.858066	0.870443	0.882939	0.880742	0.896727	0.926632
19.57	0.888696	0.720758	0.705678	0.729257	0.839541	0.779922	0.731805	0.884331	0.853922	0.83661	0.854814	0.867322	0.876116	0.878746	0.894592	0.925515
19.67	0.887506	0.721419	0.705357	0.724281	0.838069	0.777186	0.728496	0.884794	0.855833	0.837771	0.858343	0.862744	0.88402	0.882255	0.893842	0.926059
19.77	0.88576	0.720198	0.703944	0.72146	0.839813	0.782535	0.729745	0.878191	0.854341	0.832558	0.853175	0.863933	0.88122	0.880776	0.894918	0.929052
19.87	0.883738	0.719194	0.701964	0.727934	0.838084	0.778191	0.73039	0.879481	0.851559	0.830549	0.85365	0.862274	0.87722	0.877832	0.895018	0.921769
19.97	0.879851	0.716812	0.699585	0.724584	0.835942	0.774638	0.731785	0.874787	0.851923	0.832014	0.8533	0.86064	0.881138	0.877703	0.896385	0.920533
20.07	0.880239	0.717398	0.699862	0.725758	0.830364	0.776426	0.724907	0.875985	0.849891	0.833252	0.849704	0.862246	0.878196	0.87366	0.891825	0.921733
20.17	0.881269	0.712851	0.697381	0.723548	0.835197	0.770515	0.726356	0.874166	0.851302	0.826539	0.844797	0.864108	0.871807	0.878995	0.887887	0.923665
20.27	0.879119	0.717424	0.698963	0.724008	0.830452	0.777626	0.727073	0.87255	0.851882	0.826241	0.850883	0.861113	0.873398	0.872252	0.890887	0.916672
20.37	0.87172	0.719335	0.69418	0.720967	0.825293	0.774589	0.728612	0.869092	0.849247	0.827418	0.847107	0.85488	0.87582	0.875396	0.890687	0.915
20.47	0.877189	0.712337	0.691824	0.721529	0.827533	0.776647	0.725537	0.868766	0.849932	0.824862	0.846675	0.85924	0.869742	0.873978	0.88837	0.915637
20.57	0.878286	0.715305	0.698398	0.719816	0.827497	0.774728	0.724065	0.868355	0.849588	0.822822	0.846369	0.856391	0.872136	0.868951	0.886065	0.918594
20.67	0.876136	0.710904	0.691837	0.721871	0.82556	0.774669	0.723356	0.868368	0.850618	0.826544	0.849193	0.855083	0.867342	0.869182	0.882736	0.913993
20.77	0.87599	0.712211	0.692053	0.714244	0.825971	0.770543	0.718796	0.866017	0.845152	0.825709	0.847109	0.858366	0.865596	0.873662	0.883884	0.920526
20.87	0.875841	0.713278	0.691159	0.714796	0.825219	0.770751	0.719482	0.865298	0.846426	0.825116	0.846326	0.855186	0.864627	0.87023	0.883442	0.914178
20.97	0.872118	0.708918	0.689573	0.721539	0.822727	0.76753	0.718721	0.867915	0.845873	0.818814	0.844535	0.858338	0.867479	0.868876	0.884288	0.911211
21.07	0.868722	0.706447	0.687269	0.718816	0.824502	0.766872	0.717442	0.868632	0.843672	0.824502	0.84081	0.855168	0.863271	0.864794	0.881467	0.912164
21.17	0.867802	0.707423	0.68487	0.714303	0.823878	0.76803	0.716571	0.862559	0.843875	0.820579	0.840825	0.854585	0.862842	0.866934	0.876167	0.90915
21.27	0.871101	0.703166	0.687529	0.709578	0.824512	0.764172	0.715307	0.858189	0.844486	0.821663	0.837152	0.852455	0.86149	0.861097	0.87732	0.906586
21.37	0.872558	0.701013	0.683413	0.707926	0.817694	0.764511	0.714123	0.86129	0.841509	0.818257	0.838978	0.856961	0.865917	0.867399	0.880912	0.908947
21.47	0.864198	0.701745	0.687166	0.710904	0.821006	0.761682	0.714652	0.861547	0.841614	0.817761	0.84033	0.852216	0.860409	0.865953	0.876992	0.907293
21.57	0.862998	0.700654	0.68247	0.709219	0.818545	0.763424	0.710547	0.857722	0.840473	0.820022	0.837085	0.844391	0.857919	0.863366	0.878618	0.905531
21.67	0.860437	0.69633	0.677931	0.709869	0.816042	0.760701	0.711495	0.856067	0.837689	0.816256	0.837951	0.843811	0.861375	0.86465	0.87358	0.907072
21.77	0.85802	0.697352	0.679927	0.71087	0.817162	0.75871	0.710028	0.855466	0.836571	0.812651	0.835279	0.84548	0.860725	0.861781	0.870289	0.9043
21.87	0.860974	0.698994	0.680952	0.705154	0.812443	0.764123	0.709948	0.851859	0.836122	0.811539	0.836407	0.842534	0.860848	0.859808	0.869436	0.899781
21.97	0.854002	0.694606	0.680122	0.710503	0.811734	0.759247	0.70695	0.849791	0.835315	0.813417	0.839867	0.845069	0.856252	0.86019	0.878502	0.903452
22.07	0.853429	0.692649	0.674483	0.706434	0.811919	0.757022	0.70377	0.85004	0.836692	0.811102	0.8368	0.845917	0.86306	0.856971	0.872198	0.900477
22.17	0.853311	0.695462	0.675919	0.702752	0.809145	0.754785	0.70752	0.848982	0.830591	0.812582	0.838619	0.844805	0.85524	0.857285	0.869585	0.898897
22.27	0.849878	0.694008	0.674653	0.700841	0.809016	0.757117	0.707279	0.845927	0.83736	0.812104	0.832579	0.843001	0.85153	0.852391	0.869344	0.897757
22.37	0.842094	0.692109	0.676076	0.704045	0.809548	0.755602	0.706167	0.846552	0.834914	0.811647	0.830495	0.841506	0.858359	0.851816	0.868285	0.899624
22.47	0.848329	0.693956	0.672731	0.702919	0.809155	0.752064	0.707169	0.84806	0.834763	0.812461	0.830724	0.839189	0.853136	0.856589	0.867676	0.897487
22.57	0.846377	0.691534	0.673818	0.698547	0.805622	0.757824	0.708682	0.843577	0.830924	0.810678	0.829383	0.834991	0.85711	0.850534	0.865829	0.894191
22.67	0.847941	0.692361	0.673011	0.701057	0.802398	0.751273	0.702804	0.841961	0.831353	0.80647	0.828502	0.839728	0.850927	0.853809	0.862634	0.89825
22.77	0.85116	0.688828	0.66616	0.697026	0.803858	0.74696	0.699359	0.841391	0.835276	0.805152	0.826251	0.838046	0.850934	0.849247	0.861611	0.893562
22.87	0.848111	0.685409	0.67007	0.69783	0.80089	0.750256	0.699952	0.840381	0.827847	0.809576	0.827441	0.839032	0.849524	0.850844	0.865395	0.890271
22.97	0.845948	0.682722	0.670771	0.696813	0.794432	0.745408	0.701661	0.84583	0.827241	0.805232	0.822573	0.833912	0.84957	0.852517	0.862271	0.887691
23.07	0.84342	0.684335	0.668526	0.69447	0.799074	0.749069	0.692844	0.840779	0.830647	0.805314	0.826894	0.83782	0.849455	0.847787	0.861025	0.889212
23.17	0.841997	0.685604	0.668485	0.695767	0.798188	0.749608	0.693062	0.837809	0.828204	0.805337	0.826878	0.834298	0.846572	0.849098	0.86223	0.888734
23.27	0.840491	0.684024	0.66477	0.693322	0.797679	0.746153	0.696887	0.83328	0.826907	0.803976	0.824052	0.836291	0.844612	0.846888	0.855484	0.884038
23.37	0.841966	0.683467	0.661546	0.694044	0.796752	0.740201	0.692836	0.837707	0.826228	0.799393	0.823076	0.833355	0.844132	0.848214	0.855841	0.885993
23.47	0.840602	0.682152	0.662486	0.68832	0.794915	0.744254	0.697686	0.830647	0.825643	0.803054	0.82125	0.831461	0.842421	0.844589	0.857506	0.884326
23.57	0.83952	0.684004	0.662871	0.690876	0.794224	0.746245	0.69669	0.834727	0.823182	0.802118	0.821617	0.834236	0.840499	0.842264	0.854423	0.886926
23.67	0.842508	0.67586	0.662019	0.690766	0.791896	0.738359	0.695007	0.830493	0.823074	0.802311	0.819277	0.828998	0.84027	0.841642	0.853064	0.881441
23.77	0.836605	0.681723	0.656816	0.686627	0.794697	0.741819	0.693034	0.829134	0.825509	0.797841	0.820474	0.831469	0.843148	0.843286	0.849149	0.883589
23.87	0.838431	0.680418	0.658869	0.686987	0.791424	0.741467	0.689078	0.826002	0.821088	0.800091	0.817543	0.827795	0.841915	0.842955	0.854975	0.877405
23.97	0.834714	0.67509	0.656839	0.683742	0.788937	0.732861	0.689561	0.824137	0.817812	0.795758	0.819259	0.831585	0.835053	0.840445	0.852841	0.881138
24.07	0.830606	0.674465	0.657721	0.681479	0.788361	0.736609	0.687267	0.827086	0.820297	0.795398	0.818776	0.827156	0.841583	0.837555	0.856828	0.879335
24.17	0.831713	0.674478	0.654638	0.683431	0.787264	0.734672	0.684618	0.826973	0.817841	0.800107	0.812577	0.824058	0.837244	0.835842	0.849411	0.879707
24.27	0.829558	0.674565	0.660778	0.681769	0.784441	0.736573	0.685032	0.821088	0.816587	0.795914	0.820022	0.827693	0.836733	0.83802	0.847754	0.877428
24.37	0.829478	0.671472	0.65676	0.683495	0.784647	0.732591	0.68422	0.826996	0.817219	0.794622	0.814462	0.819343	0.835921	0.83766	0.843256	0.876945
24.47	0.83245	0.669487	0.654687	0.676292	0.782476	0.733634	0.68116	0.820315	0.817607	0.793317	0.809833	0.818768	0.836787	0.836592	0.845401	0.873277
24.57	0.825843	0.67316	0.653299	0.679097	0.783013	0.730374	0.679231	0.820517	0.818665	0.794404	0.813296	0.821887	0.834552	0.830793	0.848078	0.871214
24.67	0.825512	0.665908	0.651349	0.680117	0.78329	0.732165	0.686085	0.817931	0.816261	0.791079	0.812464	0.8206	0.835664	0.829804	0.844643	0.870073
24.77	0.825041	0.666869	0.64997	0.680502	0.781392	0.72854	0.679223	0.814254	0.815475	0.791334	0.813335	0.81886	0.833802	0.834547	0.842254	0.872969
24.87	0.83001	0.667611	0.651398	0.677029	0.77535	0.725514	0.680089	0.812189	0.814339	0.792351	0.808507	0.820078	0.829496	0.830146	0.84368	0.867759
24.97	0.827053	0.665921	0.650774	0.673697	0.781045	0.72629	0.674699	0.809866	0.814935	0.793435	0.807454	0.815606	0.826115	0.829853	0.842105	0.868827
25.07	0.827264	0.664097	0.647617	0.674799	0.775424	0.730947	0.678488	0.808628	0.81754	0.791316	0.805687	0.820859	0.832874	0.827698	0.840145	0.866135
25.17	0.821404	0.664004	0.646697	0.669846	0.773872	0.725288	0.675883	0.815431	0.81401	0.789985	0.806619	0.817835	0.829139	0.824944	0.839374	0.863504
25.27	0.822365	0.661756	0.646545	0.670866	0.774224	0.723975	0.672025	0.804821	0.808954	0.790627	0.808698	0.817656	0.826547	0.823066	0.836969	0.866117
25.37	0.819017	0.660642	0.649741	0.672063	0.772847	0.720627	0.671832	0.811626	0.811472	0.786558	0.80617	0.814303	0.827405	0.823775	0.836702	0.865703
25.47	0.815423	0.658252	0.648642	0.669281	0.771113	0.72054	0.672659	0.808315	0.808795	0.784284	0.802958	0.815166	0.824266	0.824641	0.837445	0.864316
25.57	0.818542	0.658008	0.640141	0.670111	0.773017	0.716145	0.675233	0.803976	0.811981	0.787151	0.802365	0.812461	0.827929	0.821802	0.838161	0.859209
25.67	0.813687	0.659542	0.645616	0.667639	0.768436	0.721041	0.670224	0.808397	0.810162	0.783475	0.802994	0.813047	0.824258	0.823341	0.835122	0.860273
25.77	0.816022	0.658967	0.645217	0.666301	0.770751	0.715564	0.67118	0.803667	0.806262	0.780123	0.800343	0.811089	0.8193	0.820677	0.833419	0.860049
25.87	0.811762	0.65824	0.639897	0.660575	0.765708	0.718374	0.667218	0.805106	0.808253	0.784493	0.804685	0.811626	0.822174	0.816746	0.829691	0.859189
25.97	0.806658	0.658188	0.637094	0.662548	0.768375	0.714935	0.668988	0.804356	0.806355	0.78469	0.801563	0.807673	0.821558	0.820551	0.83168	0.852062
26.07	0.807251	0.655845	0.638181	0.657083	0.764049	0.715916	0.667195	0.803696	0.800893	0.777104	0.804497	0.803274	0.81652	0.819338	0.832643	0.85813
26.17	0.806799	0.658591	0.637305	0.663976	0.761788	0.713357	0.665255	0.799811	0.804862	0.777454	0.79558	0.810473	0.818303	0.814668	0.828785	0.85534
26.27	0.804346	0.655719	0.63581	0.663044	0.761629	0.713969	0.664749	0.802576	0.800988	0.780459	0.796806	0.807172	0.823187	0.820649	0.828682	0.856671
26.37	0.803056	0.650599	0.63555	0.65891	0.760449	0.706824	0.663719	0.799341	0.799984	0.779468	0.795208	0.806563	0.814	0.816672	0.830449	0.851893
26.47	0.803629	0.649944	0.633973	0.658782	0.75824	0.711672	0.66207	0.797641	0.801597	0.779128	0.798113	0.807529	0.816715	0.814236	0.828584	0.851245
26.57	0.802049	0.652431	0.635668	0.660297	0.756149	0.712887	0.663452	0.795619	0.801987	0.779234	0.79323	0.806036	0.817001	0.816006	0.831508	0.848168
26.67	0.802362	0.64996	0.631781	0.656097	0.756619	0.707243	0.661733	0.794393	0.796017	0.774956	0.795688	0.800554	0.815952	0.813047	0.822948	0.852581
26.77	0.807996	0.64736	0.629477	0.659537	0.759573	0.708268	0.658676	0.791218	0.800338	0.774178	0.793124	0.800695	0.815968	0.808073	0.827184	0.848995
26.87	0.80207	0.648267	0.628134	0.656947	0.759139	0.70555	0.657369	0.794589	0.795185	0.775766	0.794108	0.800765	0.809913	0.812148	0.825743	0.850693
26.97	0.802578	0.647452	0.626374	0.657297	0.753742	0.703834	0.654286	0.790419	0.797355	0.775468	0.790165	0.802267	0.811238	0.811367	0.8232	0.847284
27.07	0.798792	0.644372	0.628632	0.655298	0.752177	0.703903	0.65983	0.792605	0.796536	0.77554	0.789569	0.798321	0.809085	0.809545	0.820664	0.846105
27.17	0.799372	0.645795	0.625038	0.654237	0.75413	0.705668	0.658188	0.786589	0.795544	0.76801	0.79214	0.798727	0.808117	0.809854	0.82248	0.843908
27.27	0.795645	0.637361	0.627728	0.656256	0.749773	0.702593	0.651457	0.789577	0.796102	0.774491	0.785548	0.795716	0.808459	0.80861	0.820284	0.840502
27.37	0.797088	0.641002	0.627327	0.652393	0.751761	0.701496	0.656107	0.787118	0.797409	0.776046	0.787825	0.797651	0.807107	0.80775	0.818082	0.841817
27.47	0.790974	0.645947	0.626977	0.650802	0.751019	0.703898	0.6602	0.782671	0.790925	0.766332	0.786848	0.794876	0.805807	0.807896	0.816243	0.839168
27.57	0.795588	0.643956	0.623049	0.653541	0.744784	0.702156	0.6534	0.782116	0.794363	0.766402	0.78364	0.793777	0.801499	0.804009	0.818927	0.840502
27.67	0.79231	0.638648	0.621064	0.648639	0.753048	0.701953	0.651511	0.777949	0.792934	0.767381	0.783596	0.796528	0.805928	0.808153	0.818622	0.838729
27.77	0.794368	0.636868	0.625112	0.648346	0.747864	0.698701	0.648786	0.781826	0.793618	0.76568	0.780732	0.798799	0.804687	0.805142	0.817124	0.840992
27.87	0.793923	0.642412	0.617429	0.646646	0.746158	0.698462	0.649785	0.781027	0.790859	0.77194	0.778882	0.790794	0.799883	0.801584	0.812292	0.836923
27.97	0.793371	0.639124	0.618569	0.644521	0.744175	0.696189	0.648372	0.779838	0.788171	0.765919	0.782414	0.78933	0.801623	0.800626	0.812538	0.837229
28.07	0.79006	0.636945	0.617287	0.641454	0.7415	0.698575	0.648575	0.777361	0.789615	0.764488	0.781556	0.789687	0.796503	0.801029	0.814699	0.840553
28.17	0.793697	0.633451	0.618818	0.646384	0.738926	0.6952	0.648616	0.777238	0.790239	0.762597	0.781066	0.790057	0.801086	0.80087	0.814773	0.837016
28.27	0.787131	0.631206	0.616761	0.640534	0.741855	0.694884	0.643619	0.778525	0.784847	0.765056	0.778145	0.788826	0.801828	0.799346	0.80619	0.833391
28.37	0.785286	0.631391	0.613837	0.641472	0.739104	0.691508	0.644637	0.773166	0.786252	0.764007	0.777762	0.785949	0.797494	0.800998	0.809579	0.833637
28.47	0.788408	0.633695	0.613416	0.637541	0.736237	0.68729	0.643879	0.771622	0.782748	0.761744	0.776588	0.787935	0.797104	0.799591	0.807038	0.832147
28.57	0.785153	0.630538	0.612833	0.641017	0.737583	0.692042	0.637431	0.774353	0.784056	0.759525	0.777412	0.789158	0.795824	0.797684	0.807282	0.832129
28.67	0.783498	0.628362	0.613927	0.63861	0.73533	0.690825	0.64122	0.768459	0.786676	0.765736	0.775314	0.7886	0.795311	0.791814	0.806663	0.829506
28.77	0.777847	0.628981	0.613827	0.633518	0.732709	0.690152	0.642309	0.766826	0.782535	0.760028	0.772506	0.784259	0.797057	0.795447	0.802522	0.828813
28.87	0.78075	0.628	0.611047	0.63637	0.731111	0.684325	0.637916	0.770304	0.780159	0.757498	0.772136	0.786129	0.793505	0.7925	0.802311	0.827369
28.97	0.779907	0.629161	0.605853	0.631373	0.728882	0.688235	0.639018	0.765667	0.782255	0.758415	0.774104	0.781474	0.790193	0.790396	0.803976	0.826277
29.07	0.777608	0.627861	0.606056	0.635093	0.7289	0.687773	0.638207	0.765176	0.778502	0.754042	0.772398	0.785271	0.79167	0.793674	0.804726	0.826298
29.17	0.776631	0.628375	0.605591	0.633392	0.728383	0.68462	0.637233	0.763352	0.781489	0.757218	0.770813	0.781541	0.792464	0.794864	0.800433	0.824024
29.27	0.774486	0.624791	0.606323	0.63238	0.728319	0.685008	0.635453	0.759599	0.779604	0.755008	0.773698	0.775457	0.79279	0.786381	0.800443	0.826318
29.37	0.771447	0.621637	0.605907	0.62958	0.724065	0.685276	0.632817	0.759889	0.782008	0.75125	0.76894	0.782057	0.786622	0.792436	0.798601	0.822113
29.47	0.774453	0.6268	0.60705	0.628491	0.727122	0.680317	0.635512	0.761112	0.777451	0.755779	0.769831	0.777263	0.790794	0.790943	0.799262	0.824718
29.57	0.776071	0.622798	0.604684	0.626186	0.723602	0.683827	0.637179	0.759915	0.775606	0.753141	0.770689	0.783229	0.7859	0.783239	0.799673	0.820279
29.67	0.778854	0.620496	0.60389	0.627437	0.724797	0.680112	0.632133	0.759923	0.776814	0.752981	0.768626	0.774612	0.787478	0.78495	0.795624	0.81503
29.77	0.772254	0.621051	0.598952	0.629364	0.722397	0.676222	0.631604	0.756637	0.775686	0.751869	0.764549	0.773944	0.784567	0.784141	0.794848	0.817057
29.87	0.773908	0.62009	0.603307	0.627301	0.722066	0.678768	0.630456	0.754256	0.775894	0.749585	0.764891	0.770425	0.788811	0.784282	0.794982	0.815767
29.97	0.771388	0.618238	0.602081	0.624925	0.720258	0.673379	0.628113	0.753241	0.772472	0.746646	0.762733	0.771668	0.782997	0.781949	0.794293	0.81399
30.07	0.764357	0.615317	0.597295	0.620385	0.719518	0.677245	0.631789	0.750322	0.771833	0.749105	0.763694	0.773633	0.777238	0.783229	0.792367	0.813879
30.17	0.766779	0.617757	0.596938	0.62287	0.718752	0.676526	0.626993	0.750816	0.76848	0.749467	0.763139	0.773089	0.783329	0.777454	0.792551	0.818272
30.27	0.767763	0.613847	0.599078	0.624303	0.716309	0.672235	0.623363	0.752722	0.771347	0.747628	0.763422	0.774332	0.783794	0.780642	0.793358	0.81559
30.37	0.764961	0.610071	0.59494	0.62084	0.718441	0.670499	0.62577	0.751396	0.77164	0.746985	0.76074	0.774278	0.779799	0.777078	0.789641	0.81577
30.47	0.764765	0.61292	0.594272	0.619802	0.7183	0.671976	0.621619	0.749934	0.774091	0.745028	0.763162	0.771948	0.776328	0.779236	0.789212	0.810868
30.57	0.766951	0.608797	0.595469	0.622638	0.717046	0.668672	0.619718	0.748347	0.770078	0.739923	0.760819	0.774296	0.78077	0.776544	0.789543	0.812859
30.67	0.76223	0.612211	0.595469	0.617598	0.712186	0.668287	0.623864	0.744129	0.76355	0.744676	0.76308	0.766736	0.77938	0.776426	0.790704	0.811616
30.77	0.763365	0.61384	0.590976	0.617876	0.712831	0.666879	0.621698	0.751227	0.768398	0.74781	0.760742	0.767118	0.775434	0.7749	0.786717	0.814573
30.87	0.759406	0.607823	0.593519	0.617603	0.712404	0.667845	0.620298	0.743807	0.769377	0.743617	0.758276	0.770987	0.774127	0.773808	0.784277	0.809674
30.97	0.760421	0.608802	0.591895	0.618014	0.712622	0.666129	0.619114	0.746358	0.762867	0.742942	0.759509	0.767314	0.77574	0.772328	0.78394	0.805664
31.07	0.749336	0.607592	0.591387	0.6157	0.714755	0.66561	0.621945	0.742713	0.762576	0.737254	0.759273	0.763363	0.77351	0.773102	0.783036	0.807375
31.17	0.755083	0.609955	0.586156	0.61414	0.708859	0.665731	0.620799	0.739846	0.761739	0.741357	0.75565	0.760997	0.778854	0.772133	0.786188	0.806519
31.27	0.750944	0.604522	0.588145	0.613128	0.708638	0.660983	0.617033	0.739163	0.762664	0.738048	0.755638	0.763157	0.777631	0.768963	0.778322	0.805484
31.37	0.750831	0.605596	0.586488	0.615646	0.704867	0.664796	0.615836	0.742392	0.764806	0.742546	0.75422	0.76373	0.771982	0.774584	0.782964	0.802231
31.47	0.746687	0.604352	0.590421	0.613991	0.705273	0.657214	0.617852	0.736373	0.760426	0.736648	0.750764	0.757698	0.771773	0.769608	0.778152	0.802976
31.57	0.743638	0.604614	0.584818	0.612445	0.70229	0.660462	0.613269	0.736375	0.764311	0.736712	0.752496	0.760573	0.769562	0.764018	0.782409	0.8031
31.67	0.748172	0.601932	0.586033	0.612362	0.704224	0.658918	0.613444	0.732255	0.761277	0.73635	0.755103	0.758453	0.768069	0.765497	0.781304	0.799138
31.77	0.748927	0.600376	0.582267	0.607625	0.70025	0.658342	0.613128	0.736825	0.759972	0.735165	0.747779	0.757272	0.766741	0.764598	0.776246	0.800112
31.87	0.747283	0.601727	0.585419	0.610446	0.700055	0.659267	0.612167	0.734014	0.756714	0.733696	0.745947	0.756629	0.768521	0.763866	0.778134	0.79938
31.97	0.74409	0.599096	0.583073	0.605675	0.699225	0.658938	0.612345	0.730474	0.755943	0.732211	0.747317	0.760737	0.767522	0.766564	0.777572	0.795786
32.07	0.74306	0.599024	0.576695	0.604355	0.700278	0.654985	0.61161	0.731273	0.756914	0.735358	0.747132	0.756444	0.767388	0.766492	0.774132	0.795883
32.17	0.741357	0.603905	0.579523	0.603654	0.70043	0.652963	0.607266	0.7278	0.754073	0.73477	0.746962	0.754692	0.763627	0.763378	0.772382	0.79603
32.27	0.743849	0.598929	0.58061	0.604183	0.699916	0.656092	0.60576	0.729544	0.756241	0.734171	0.743165	0.760064	0.762024	0.762481	0.776806	0.795061
32.37	0.742621	0.595633	0.576278	0.604067	0.695826	0.653238	0.60993	0.727276	0.757945	0.730968	0.746813	0.752	0.763262	0.765405	0.770939	0.795698
32.47	0.743422	0.597881	0.581465	0.60388	0.695896	0.653135	0.60539	0.723831	0.752956	0.729598	0.744812	0.754983	0.764768	0.759954	0.769806	0.790686
32.57	0.742053	0.589763	0.580427	0.602146	0.693496	0.651925	0.605031	0.724096	0.752455	0.729652	0.741444	0.753999	0.76252	0.75916	0.769598	0.790807
32.67	0.74259	0.591024	0.578375	0.604337	0.695102	0.652105	0.607972	0.725139	0.753852	0.728954	0.742518	0.754931	0.757957	0.76235	0.772382	0.78793
32.77	0.742348	0.591441	0.576376	0.598038	0.693835	0.650337	0.604851	0.724764	0.751743	0.726829	0.740755	0.746613	0.759625	0.76002	0.769187	0.789569
32.87	0.739127	0.594169	0.573884	0.602107	0.689846	0.650607	0.604519	0.723587	0.751204	0.728666	0.744753	0.753832	0.758726	0.759573	0.768935	0.790424
32.97	0.738438	0.589976	0.574105	0.599962	0.690069	0.650116	0.605454	0.724871	0.750356	0.728558	0.737642	0.749428	0.759062	0.754338	0.768424	0.788469
33.07	0.737208	0.590038	0.575906	0.601727	0.689255	0.64169	0.602772	0.719266	0.74556	0.72315	0.738783	0.744427	0.756051	0.75636	0.763401	0.78617
33.17	0.735874	0.590603	0.573483	0.598868	0.689643	0.64617	0.601383	0.717116	0.744411	0.723774	0.738428	0.748704	0.754279	0.75814	0.76289	0.787002
33.27	0.728458	0.58808	0.571405	0.595967	0.683244	0.642903	0.600306	0.716735	0.745914	0.720825	0.735682	0.748049	0.754895	0.753654	0.76337	0.783837
33.37	0.732393	0.592633	0.569892	0.600155	0.692148	0.642199	0.599525	0.714865	0.744162	0.723738	0.737436	0.744673	0.754844	0.748755	0.762088	0.785736
33.47	0.730582	0.586947	0.570431	0.596101	0.687336	0.63991	0.5984	0.713696	0.741596	0.719605	0.736876	0.743533	0.753213	0.751496	0.765539	0.777384
33.57	0.726623	0.585141	0.570673	0.595238	0.676983	0.640375	0.597619	0.717455	0.744362	0.721819	0.731042	0.746731	0.755324	0.74975	0.761415	0.783439
33.67	0.734906	0.583279	0.567212	0.593206	0.682134	0.638836	0.599821	0.716432	0.743589	0.723566	0.731451	0.744922	0.748491	0.751196	0.760578	0.783354
33.77	0.728134	0.585568	0.566961	0.592306	0.679634	0.639375	0.595857	0.711451	0.742197	0.716959	0.729126	0.740201	0.748691	0.74922	0.760447	0.777641
33.87	0.727279	0.583446	0.564988	0.591996	0.6821	0.638831	0.596491	0.71132	0.73952	0.717897	0.729624	0.746233	0.751013	0.752329	0.755142	0.776035
33.97	0.725542	0.585437	0.562778	0.592928	0.676169	0.637477	0.593758	0.714405	0.740013	0.719371	0.733655	0.743931	0.75078	0.746821	0.7574	0.779776
34.07	0.726634	0.579929	0.564484	0.589488	0.67584	0.639244	0.594755	0.708748	0.74056	0.715674	0.733603	0.737752	0.75025	0.7465	0.753809	0.779401
34.17	0.726225	0.578172	0.56535	0.589136	0.677299	0.63648	0.593362	0.708319	0.742657	0.715042	0.731733	0.738919	0.749672	0.744632	0.755715	0.773179
34.27	0.724853	0.577794	0.56246	0.587405	0.676983	0.633004	0.589922	0.708027	0.741143	0.716247	0.729311	0.736938	0.75023	0.746004	0.752116	0.772675
34.37	0.718716	0.575605	0.561129	0.585288	0.676073	0.633318	0.588715	0.70621	0.739666	0.714362	0.726744	0.735075	0.743792	0.74631	0.753292	0.766707
34.47	0.717275	0.575197	0.561545	0.584849	0.670673	0.63321	0.591132	0.704242	0.737901	0.714685	0.726883	0.735206	0.744129	0.743391	0.750836	0.773071
34.57	0.718937	0.578442	0.558398	0.581496	0.671868	0.631424	0.591726	0.703693	0.737824	0.711926	0.730197	0.737264	0.743276	0.742631	0.759617	0.771432
34.67	0.720574	0.576302	0.559184	0.582513	0.673456	0.632115	0.588977	0.701293	0.734744	0.710806	0.728106	0.734276	0.739684	0.741516	0.749205	0.769836
34.77	0.71476	0.574018	0.558912	0.5848	0.6714	0.628051	0.590929	0.702542	0.734652	0.712206	0.724486	0.736378	0.74233	0.736414	0.753791	0.769924
34.87	0.7169	0.572027	0.556978	0.583967	0.668577	0.626957	0.587543	0.700672	0.734395	0.711032	0.726364	0.731533	0.740509	0.736756	0.749231	0.768254
34.97	0.715821	0.573149	0.557235	0.582467	0.667768	0.631342	0.584168	0.700982	0.735713	0.708358	0.728869	0.73088	0.739486	0.740023	0.749189	0.766183
35.07	0.715127	0.574886	0.552415	0.583341	0.669027	0.625004	0.588217	0.694519	0.731972	0.70677	0.724001	0.729845	0.741454	0.738582	0.747746	0.764609
35.17	0.713252	0.574419	0.555945	0.578218	0.668703	0.627291	0.585753	0.692453	0.732429	0.707392	0.720013	0.732221	0.736874	0.736147	0.749436	0.769952
35.27	0.718526	0.57121	0.552975	0.578375	0.665348	0.627209	0.582914	0.693206	0.72761	0.708432	0.72054	0.732201	0.743558	0.738287	0.74735	0.764267
35.37	0.71541	0.574349	0.553823	0.580903	0.665772	0.623312	0.583204	0.696173	0.727538	0.703084	0.719466	0.727823	0.737508	0.735433	0.746985	0.764359
35.47	0.713272	0.57002	0.552055	0.577681	0.666322	0.624321	0.580057	0.696096	0.734205	0.706783	0.721375	0.726333	0.736447	0.736111	0.748704	0.762602
35.57	0.709571	0.567251	0.552361	0.57477	0.663729	0.62205	0.580723	0.690652	0.728078	0.709175	0.718261	0.729126	0.7333	0.733025	0.743327	0.76139
35.67

## Sheet: secondary data n=1-3
L (μM)	mitochondria ampl			mitochondria k1			mitochondria k2			mitoplasts ampl			mitoplasts k1			mitoplasts k2			mitochondria ampl avrg	mitochondria ampl SEM	mitochondria k1 avrg	mitochondria k1 SEM	mitochondria k2 avrg	mitochondria k2 SEM	mitoplasts ampl avrg	mitoplasts ampl SEM	mitoplasts k1 avrg	mitoplasts k1 SEM	mitoplasts k2 avrg	mitoplasts k2 SEM
0.1	3190013	3169043	3539330	1.97596	1.14389	2.06874	0.361974	0.288677	0.358977	2884835	3559462	3841903	4.34258	1.66017	2.40854	0.377385	0.311988	0.423268	3299462	120087	1.72953	0.294042	0.336543	0.0239485	3.42873e+06	283909	2.80376	0.799162	0.37088	0.032288
0.16	3138931	3232557	3441973	2.44336	1.69252	3.43478	0.365366	0.325169	0.387197	2922903	3735207	3222389	5.51743	2.37556	3.56035	0.391999	0.300829	0.509923	3.27115e+06	89584	2.52355	0.504541	0.359244	0.0181657	3.2935e+06	237172	3.81778	0.916067	0.400917	0.0605247
0.25	3304843	3281816	3554821	2.74275	2.15924	4.74771	0.424318	0.326571	0.427636	2875448	3514443	3152349	8.22433	2.91997	5.43578	0.433164	0.32904	0.542588	3.38049e+06	87416.9	3.21657	0.783883	0.392842	0.0331492	3.18075e+06	185008	5.52669	1.53191	0.434931	0.0616523
0.4	3239927	3673413	3595268	2.77012	2.94944	5.75049	0.426862	0.410084	0.450243	2930170	3680233	3274726	9.12993	4.96711	9.00298	0.452574	0.424467	0.543057	3.50287e+06	133392	3.82335	0.96496	0.429063	0.011645	3295043	216763	7.70001	1.36694	0.473366	0.0357777
0.63	3545616	3577224	3668750	2.4195	3.78712	6.15638	0.491346	0.426845	0.470706	3032631	3859787	3720910	9.96181	5.2867	15.4655	0.474211	0.432269	0.56453	3.5972e+06	36921.9	4.121	1.09158	0.462966	0.0190178	3537776	255734	10.238	2.94161	0.490337	0.0390225
1	3380766	3538475	3676020	3.09925	4.27736	8.1901	0.432705	0.43831	0.472464	3124254	4010073	3429924	8.18745	7.5546	30	0.45278	0.428206	0.570349	3.53175e+06	85298.7	5.1889	1.53866	0.447826	0.0124246	3521417	259774	15.2474	7.37859	0.483778	0.0438628
1.58	3419557	3738055	3736172	3.22517	4.27161	12.1223	0.439679	0.459913	0.469333	3214994	4081623	3206460	17.6597	14.7788	30	0.435075	0.459881	0.57224	3.63126e+06	105854	6.5397	2.80761	0.456308	0.00874805	3.50103e+06	290309	20.8128	4.66825	0.489065	0.0421993
2.5	3669977	3855770	3891478	2.6669	4.64954	21.5404	0.455119	0.453802	0.45056	3532224	4247378	3815580	7.71851	29.637	30	0.53689	0.456813	0.578184	3.80574e+06	68660.5	9.61895	5.98814	0.45316	0.00135461	3.86506e+06	207924	22.4518	7.36741	0.523962	0.035628
