# Supplementary material for: Towards a molecular mechanism underlying mitochondrial protein import through the TOM and TIM23 complexes
Source: eLife. 2022 Jun 8;11:e75426. doi: 10.7554/eLife.75426 (PMC9255969; doi:10.7554/eLife.75426)
Supplement: Figure 5—figure supplement 1—source data 3. [file elife-75426-fig5-figsupp1-data3.xlsx]

## Sheet: primary data n=1
	mitochondria								mitoplasts
time (min)	0.1	0.16	0.25	0.4	0.63	1	1.58	2.5	0.1	0.16	0.25	0.4	0.63	1	1.58	2.5	PCP (µM)
0
0.45	0.001552	0.002555	0.003009	0.003648	0.003532	0.004231	0.005049	0.00503	0.001897	0.003133	0.003759	0.005667	0.00452	0.005823	0.006603	0.00816
0.55	0.002099	0.003179	0.004026	0.005311	0.005397	0.006447	0.007801	0.007189	0.002968	0.004563	0.006735	0.009129	0.007596	0.00993	0.011779	0.014172
0.65	0.002466	0.004196	0.005284	0.006927	0.007969	0.009134	0.011897	0.01129	0.003961	0.007089	0.009571	0.013662	0.013001	0.015403	0.018595	0.022319
0.75	0.003038	0.005297	0.007386	0.009709	0.010734	0.013803	0.017356	0.016444	0.005904	0.009687	0.013624	0.019566	0.019707	0.024613	0.028676	0.03502
0.85	0.00371	0.006582	0.009207	0.01241	0.014121	0.018134	0.022953	0.023776	0.007523	0.013201	0.018862	0.026361	0.028485	0.033463	0.040884	0.049274
0.95	0.004749	0.00843	0.011906	0.016463	0.01853	0.023765	0.03111	0.03182	0.009803	0.017033	0.024318	0.033892	0.039435	0.044986	0.055229	0.065445
1.05	0.005683	0.01071	0.014787	0.020138	0.023957	0.030409	0.038949	0.042811	0.012448	0.021461	0.030139	0.042492	0.049649	0.057847	0.068198	0.083932
1.15	0.006822	0.013114	0.017505	0.024915	0.029138	0.038372	0.048861	0.053883	0.014442	0.026202	0.036688	0.053103	0.063878	0.071846	0.086102	0.103426
1.25	0.00796	0.01482	0.021442	0.030603	0.035363	0.046249	0.059053	0.066171	0.018573	0.031677	0.044705	0.062248	0.077343	0.085967	0.102786	0.125955
1.35	0.00901	0.017494	0.024631	0.036569	0.042447	0.055966	0.070432	0.077866	0.022009	0.037668	0.053513	0.072888	0.092025	0.100852	0.120092	0.14577
1.45	0.010759	0.020935	0.028787	0.042697	0.050453	0.06599	0.082054	0.091939	0.025738	0.044748	0.062491	0.085128	0.104349	0.117166	0.141326	0.168035
1.55	0.012051	0.0237	0.032524	0.048801	0.056905	0.075743	0.092986	0.107835	0.028979	0.050607	0.070027	0.096043	0.125162	0.1302	0.158631	0.192151
1.65	0.013719	0.0255	0.037538	0.056805	0.066849	0.086598	0.106575	0.120931	0.033601	0.057256	0.078983	0.109203	0.139925	0.151029	0.1801	0.214726
1.75	0.015767	0.029408	0.041429	0.063489	0.074401	0.096402	0.119984	0.137977	0.037506	0.064123	0.091701	0.121103	0.154167	0.166575	0.197194	0.238073
1.85	0.018058	0.033126	0.046918	0.070937	0.08438	0.109373	0.135068	0.154238	0.04178	0.071765	0.099427	0.134903	0.173448	0.183853	0.219249	0.260019
1.95	0.019475	0.036024	0.051408	0.077518	0.094659	0.119142	0.15063	0.171726	0.047841	0.079418	0.110223	0.146639	0.190151	0.199455	0.239781	0.284154
2.05	0.022456	0.040477	0.057882	0.086569	0.101985	0.130132	0.164413	0.189075	0.05269	0.085719	0.118853	0.157554	0.207278	0.21842	0.257375	0.306271
2.15	0.024486	0.045288	0.061551	0.096173	0.114031	0.143805	0.182409	0.204599	0.055963	0.094338	0.130362	0.171645	0.223439	0.233286	0.276442	0.325913
2.25	0.026439	0.048486	0.068843	0.102703	0.121649	0.155743	0.197127	0.221585	0.062836	0.101054	0.141282	0.186481	0.242083	0.250766	0.297989	0.348159
2.35	0.02835	0.052555	0.074442	0.112209	0.1338	0.167487	0.211642	0.239441	0.066563	0.111419	0.154122	0.197882	0.255945	0.267529	0.316929	0.372879
2.45	0.03151	0.057053	0.08054	0.122078	0.144194	0.180674	0.225663	0.255645	0.074126	0.118578	0.163048	0.211323	0.274513	0.282648	0.336051	0.394985
2.55	0.033763	0.062043	0.085457	0.130478	0.153021	0.194199	0.241897	0.275519	0.079318	0.12691	0.174001	0.224041	0.290396	0.29654	0.353369	0.413275
2.65	0.036167	0.065232	0.092659	0.137923	0.163188	0.205505	0.256908	0.292808	0.084294	0.134045	0.186006	0.236475	0.304622	0.313967	0.371362	0.43266
2.75	0.039025	0.070454	0.098331	0.148172	0.17643	0.221488	0.269758	0.30735	0.091024	0.145031	0.196355	0.252086	0.3238	0.330055	0.389445	0.452734
2.85	0.040809	0.075659	0.104659	0.159165	0.187652	0.232927	0.284691	0.322224	0.095687	0.151469	0.206868	0.26282	0.337028	0.344354	0.407573	0.469564
2.95	0.044522	0.079507	0.111734	0.168815	0.198346	0.244387	0.302015	0.338889	0.102878	0.158431	0.218687	0.277038	0.349073	0.355811	0.419824	0.486376
3.05	0.046888	0.083849	0.11871	0.176138	0.208765	0.257807	0.315677	0.354405	0.109589	0.167908	0.22777	0.286183	0.367434	0.373378	0.435923	0.503181
3.15	0.049673	0.091682	0.124922	0.185367	0.220055	0.269637	0.32819	0.372663	0.114635	0.176735	0.239133	0.301082	0.381188	0.387591	0.453506	0.521671
3.25	0.053362	0.094902	0.130208	0.197847	0.230674	0.282279	0.344008	0.387623	0.121935	0.183931	0.249946	0.313011	0.398657	0.400886	0.46709	0.536175
3.35	0.055253	0.100949	0.138857	0.205414	0.242104	0.291383	0.356775	0.404926	0.127245	0.192569	0.262219	0.324566	0.411062	0.416143	0.486705	0.550736
3.45	0.059053	0.106607	0.144788	0.21512	0.253959	0.308831	0.371357	0.417096	0.13431	0.20163	0.269105	0.341391	0.424794	0.428103	0.499854	0.567191
3.55	0.062026	0.11276	0.152127	0.225525	0.262807	0.318149	0.388573	0.434004	0.144226	0.207173	0.278574	0.348906	0.437844	0.439868	0.517143	0.580899
3.65	0.065475	0.11619	0.159885	0.233658	0.273503	0.331644	0.395918	0.445648	0.146355	0.218755	0.28991	0.361759	0.451331	0.455678	0.528363	0.600126
3.75	0.0683	0.121109	0.167595	0.246074	0.285754	0.340441	0.409869	0.46012	0.152986	0.225587	0.302015	0.373017	0.464305	0.468118	0.54195	0.612177
3.85	0.072782	0.126371	0.174028	0.254131	0.297374	0.354095	0.421945	0.474691	0.160733	0.233205	0.311441	0.384329	0.477646	0.481211	0.55973	0.624331
3.95	0.075726	0.132056	0.180715	0.265227	0.308977	0.364773	0.434398	0.485356	0.164316	0.242752	0.31925	0.394172	0.489794	0.492094	0.567224	0.638128
4.05	0.079464	0.13652	0.188565	0.274445	0.321377	0.373095	0.447826	0.499644	0.17116	0.253192	0.326004	0.405724	0.505462	0.502186	0.581771	0.65278
4.15	0.082734	0.14445	0.196806	0.28369	0.329275	0.387564	0.457305	0.512246	0.177174	0.257504	0.337904	0.416405	0.513848	0.517375	0.591922	0.663596
4.25	0.085155	0.148968	0.203862	0.292509	0.340444	0.399019	0.473777	0.521774	0.186257	0.266539	0.345776	0.425682	0.526957	0.524969	0.602419	0.675372
4.35	0.089459	0.154143	0.213236	0.30164	0.351723	0.411156	0.488391	0.534505	0.19255	0.269912	0.354581	0.434198	0.539011	0.533563	0.615674	0.689436
4.45	0.092092	0.159589	0.217103	0.313386	0.361052	0.417236	0.496209	0.550966	0.196104	0.27988	0.362935	0.444898	0.548127	0.545712	0.626298	0.696795
4.55	0.095479	0.164497	0.224071	0.321355	0.372037	0.430723	0.505499	0.559598	0.202707	0.291181	0.374336	0.453762	0.562021	0.558219	0.636355	0.706876
4.65	0.100833	0.171108	0.227687	0.331034	0.380845	0.440783	0.515198	0.572259	0.209432	0.296713	0.381374	0.464408	0.574048	0.566387	0.645222	0.720457
4.75	0.103296	0.177501	0.237317	0.338371	0.39071	0.450233	0.525951	0.580916	0.214866	0.304595	0.389628	0.476165	0.583258	0.573411	0.653938	0.728383
4.85	0.107463	0.182855	0.24528	0.34627	0.401585	0.4575	0.537622	0.590241	0.22161	0.310885	0.392167	0.481707	0.592889	0.588104	0.666027	0.741859
4.95	0.11178	0.188867	0.251708	0.355512	0.40968	0.470439	0.546902	0.604748	0.229187	0.318567	0.403935	0.491791	0.599249	0.595047	0.679309	0.752304
5.05	0.115704	0.194679	0.258689	0.365027	0.421138	0.479459	0.559269	0.61252	0.234241	0.324388	0.410968	0.503022	0.612234	0.602646	0.685402	0.762073
5.15	0.118022	0.198187	0.266844	0.370723	0.430353	0.488364	0.564409	0.620359	0.240958	0.332788	0.419943	0.509855	0.624307	0.612029	0.697054	0.770516
5.25	0.121643	0.203625	0.273954	0.384258	0.438395	0.497911	0.57475	0.626508	0.245032	0.342721	0.428208	0.518814	0.629442	0.621953	0.704099	0.776372
5.35	0.125472	0.210427	0.281118	0.390368	0.443406	0.50506	0.582675	0.636889	0.252852	0.347859	0.433626	0.53077	0.638249	0.63112	0.711013	0.781793
5.45	0.131128	0.215921	0.286588	0.397133	0.453843	0.512939	0.593504	0.646469	0.258935	0.353987	0.442836	0.534354	0.650946	0.634919	0.723161	0.79188
5.55	0.134245	0.221809	0.294827	0.406456	0.462303	0.521188	0.601159	0.654999	0.264742	0.361397	0.450767	0.542368	0.656728	0.64598	0.727374	0.795169
5.65	0.137467	0.225906	0.297641	0.411094	0.470738	0.528895	0.609756	0.667697	0.270897	0.366254	0.459175	0.553113	0.663021	0.654648	0.731669	0.795123
5.75	0.140675	0.234846	0.308543	0.425518	0.480369	0.535557	0.614517	0.675113	0.274774	0.371667	0.466618	0.555693	0.672781	0.662935	0.745596	0.803491
5.85	0.144253	0.238043	0.315583	0.432461	0.490445	0.548013	0.623756	0.682075	0.278315	0.37938	0.473226	0.568052	0.680936	0.670547	0.746125	0.810944
5.95	0.148717	0.245823	0.319075	0.43942	0.496846	0.55365	0.629981	0.686546	0.288051	0.388805	0.480973	0.572693	0.684935	0.672914	0.760098	0.820419
6.05	0.152082	0.251239	0.325365	0.449809	0.504741	0.564841	0.636657	0.696692	0.293299	0.39111	0.486057	0.583093	0.694077	0.682326	0.763271	0.82509
6.15	0.155946	0.258789	0.33421	0.455748	0.513514	0.56551	0.648822	0.702596	0.297517	0.396382	0.493937	0.587597	0.704248	0.695043	0.770452	0.831485
6.25	0.160911	0.261749	0.337424	0.463528	0.521196	0.577	0.650001	0.709178	0.301511	0.407125	0.502798	0.59223	0.707688	0.695178	0.781715	0.829502
6.35	0.164046	0.267559	0.346127	0.468107	0.533552	0.582607	0.65543	0.720023	0.308486	0.413801	0.508425	0.599405	0.714267	0.703797	0.787816	0.83774
6.45	0.16885	0.272249	0.352668	0.475347	0.536532	0.588118	0.667808	0.722255	0.313934	0.418396	0.517246	0.606599	0.723903	0.709442	0.792193	0.847371
6.55	0.170868	0.276947	0.360663	0.48875	0.543035	0.592656	0.669907	0.730056	0.316738	0.423364	0.523239	0.616818	0.729368	0.716251	0.797101	0.847808
6.65	0.174778	0.282392	0.367069	0.491654	0.552401	0.601505	0.67266	0.73498	0.3217	0.429031	0.531143	0.623896	0.733712	0.715001	0.802347	0.853798
6.75	0.179355	0.28784	0.372477	0.499047	0.558664	0.606302	0.680914	0.7463	0.332837	0.435683	0.531704	0.630383	0.74045	0.721337	0.802285	0.863637
6.85	0.184584	0.295596	0.380173	0.510103	0.563546	0.612015	0.689199	0.75038	0.33421	0.439309	0.541661	0.632658	0.744657	0.730015	0.809614	0.867566
6.95	0.188532	0.301055	0.384053	0.515389	0.574779	0.624242	0.693225	0.753897	0.341634	0.445292	0.544125	0.637858	0.7502	0.735323	0.821884	0.875961
7.05	0.192386	0.303621	0.394753	0.524062	0.575635	0.628219	0.696215	0.755497	0.344715	0.450249	0.552841	0.643824	0.759998	0.739109	0.827766	0.8801
7.15	0.196072	0.309695	0.400476	0.526364	0.580635	0.631565	0.700872	0.763794	0.351035	0.454237	0.556743	0.653876	0.763085	0.746071	0.827545	0.88272
7.25	0.200349	0.314299	0.40723	0.540617	0.592913	0.640351	0.707462	0.76693	0.356367	0.462281	0.562688	0.659157	0.765306	0.746781	0.834896	0.888932
7.35	0.204218	0.320753	0.412749	0.544797	0.596853	0.642078	0.712392	0.775185	0.35895	0.463825	0.564307	0.66546	0.772572	0.755108	0.836895	0.89574
7.45	0.206372	0.325486	0.415868	0.550458	0.609039	0.644731	0.719459	0.778684	0.362674	0.467001	0.575081	0.667997	0.781051	0.757736	0.842219	0.904119
7.55	0.209942	0.332124	0.419988	0.557358	0.614266	0.654483	0.721531	0.784413	0.367374	0.477355	0.577319	0.676254	0.78532	0.763854	0.847978	0.902983
7.65	0.211647	0.340023	0.426878	0.560364	0.612884	0.65974	0.729932	0.786127	0.372577	0.479988	0.583039	0.681527	0.784322	0.767629	0.847972	0.910061
7.75	0.217818	0.342354	0.433907	0.565958	0.623718	0.664133	0.730749	0.792376	0.377442	0.487881	0.593137	0.68473	0.792026	0.771334	0.853264	0.913868
7.85	0.22158	0.347322	0.442407	0.574863	0.627504	0.665272	0.734622	0.79909	0.38414	0.491227	0.593021	0.689107	0.794424	0.772394	0.858316	0.919263
7.95	0.223453	0.351764	0.444566	0.5805	0.633937	0.672903	0.74136	0.800067	0.387043	0.493556	0.600242	0.69547	0.799309	0.779084	0.86296	0.92253
8.05	0.227063	0.355185	0.452734	0.583525	0.64071	0.678599	0.745272	0.804824	0.390929	0.49928	0.604508	0.698883	0.797657	0.781127	0.868316	0.923963
8.15	0.234101	0.360593	0.458865	0.594416	0.644537	0.681681	0.746948	0.808327	0.395341	0.504663	0.608966	0.700389	0.800949	0.785298	0.871425	0.92831
8.25	0.234997	0.368489	0.46631	0.597309	0.64927	0.683688	0.757906	0.810259	0.398417	0.509539	0.61494	0.704879	0.812267	0.783884	0.873573	0.932215
8.35	0.240609	0.373362	0.470857	0.60607	0.656218	0.691274	0.754682	0.813913	0.405357	0.51554	0.621082	0.711477	0.814385	0.794953	0.873537	0.933195
8.45	0.245251	0.377949	0.475941	0.608585	0.662352	0.693597	0.758773	0.820014	0.407859	0.516682	0.62524	0.715225	0.819482	0.796092	0.879131	0.934198
8.55	0.246802	0.383047	0.482309	0.618081	0.665863	0.700905	0.761404	0.8221	0.411753	0.517167	0.630302	0.722692	0.821989	0.796446	0.881341	0.938856
8.65	0.252178	0.385761	0.489284	0.619851	0.671786	0.70611	0.765136	0.826981	0.41889	0.5274	0.632402	0.723024	0.825967	0.802118	0.886333	0.943961
8.75	0.256546	0.390886	0.491727	0.626454	0.671319	0.710147	0.768533	0.832111	0.418294	0.526963	0.635413	0.727247	0.828217	0.806659	0.889056	0.944477
8.85	0.26081	0.396669	0.497442	0.636539	0.683796	0.713582	0.77631	0.831504	0.425671	0.532106	0.6421	0.729292	0.832923	0.80561	0.893471	0.941843
8.95	0.26445	0.399108	0.501651	0.63775	0.681654	0.717489	0.779729	0.836947	0.424759	0.537584	0.647168	0.735642	0.834483	0.812353	0.897143	0.949086
9.05	0.265646	0.405287	0.507256	0.645848	0.684938	0.717729	0.779534	0.84063	0.433478	0.541049	0.650735	0.735706	0.844329	0.814012	0.895317	0.949652
9.15	0.269771	0.410795	0.512434	0.649866	0.694679	0.722827	0.785865	0.842505	0.437194	0.54423	0.654926	0.73916	0.841855	0.816344	0.902597	0.94649
9.25	0.270902	0.4092	0.51686	0.653366	0.692844	0.730631	0.788874	0.842119	0.438268	0.546993	0.664405	0.740823	0.845646	0.820073	0.902516	0.950964
9.35	0.277408	0.417814	0.520527	0.657484	0.70244	0.728434	0.787689	0.849851	0.441546	0.553437	0.661542	0.749377	0.850115	0.823956	0.906124	0.953406
9.45	0.279456	0.423896	0.525066	0.667557	0.701066	0.731483	0.793237	0.848984	0.444617	0.556573	0.666977	0.745712	0.852889	0.822839	0.907713	0.954974
9.55	0.283223	0.427048	0.532859	0.670825	0.708296	0.734983	0.796184	0.847646	0.44809	0.558486	0.670512	0.755985	0.85406	0.826385	0.907716	0.958352
9.65	0.286237	0.428629	0.534125	0.668798	0.709132	0.738855	0.800855	0.848976	0.453921	0.564023	0.675558	0.752431	0.861875	0.829113	0.90696	0.958171
9.75	0.290269	0.434714	0.541381	0.678545	0.710794	0.740701	0.798043	0.853601	0.455897	0.56466	0.679803	0.756611	0.869293	0.828886	0.915406	0.962303
9.85	0.294187	0.438845	0.54916	0.676716	0.715476	0.742787	0.802749	0.856402	0.460274	0.566309	0.682828	0.754056	0.865461	0.832626	0.913218	0.962683
9.95	0.298051	0.442313	0.545372	0.682539	0.723034	0.742833	0.809239	0.857452	0.461555	0.570732	0.686352	0.756061	0.873214	0.837559	0.912773	0.965835
10.05	0.301751	0.444396	0.553912	0.687226	0.72682	0.747194	0.810637	0.858591	0.467414	0.573651	0.688203	0.759061	0.873421	0.839891	0.911564	0.962621
10.15	0.306605	0.451862	0.557542	0.691101	0.727214	0.75252	0.807717	0.861991	0.472484	0.580265	0.689514	0.760934	0.876249	0.837929	0.912767	0.966925
10.25	0.306462	0.45577	0.559733	0.694817	0.731613	0.756206	0.813602	0.868383	0.473032	0.579917	0.69384	0.766334	0.882842	0.841332	0.909802	0.96675
10.35	0.311473	0.455333	0.569892	0.696935	0.734746	0.761072	0.815375	0.865528	0.478836	0.583951	0.697799	0.764237	0.88534	0.841094	0.909211	0.970474
10.45	0.312887	0.462867	0.577462	0.7073	0.740777	0.763973	0.816913	0.864641	0.478234	0.588064	0.701976	0.7705	0.88798	0.845644	0.913785	0.976631
10.55	0.319315	0.467994	0.574488	0.708897	0.744873	0.761711	0.820656	0.867882	0.480968	0.591507	0.70418	0.773889	0.890967	0.844993	0.910798	0.978755
10.65	0.321228	0.471499	0.576873	0.712853	0.745062	0.763206	0.825516	0.868294	0.484651	0.593517	0.71043	0.772297	0.893533	0.846933	0.914046	0.979101
10.75	0.325794	0.475547	0.582313	0.715395	0.748052	0.766949	0.824712	0.868084	0.489678	0.597093	0.711148	0.775077	0.897985	0.851729	0.921991	0.983032
10.85	0.329075	0.476232	0.584175	0.721804	0.75306	0.767143	0.832481	0.870356	0.490868	0.59736	0.715136	0.776553	0.897742	0.849157	0.918456	0.979934
10.95	0.331207	0.481076	0.592441	0.726308	0.754061	0.769666	0.837891	0.87537	0.494452	0.599025	0.724073	0.780187	0.901596	0.853337	0.919403	0.987002
11.05	0.335662	0.485455	0.593865	0.724125	0.756824	0.775781	0.832335	0.875051	0.494185	0.603429	0.725965	0.780312	0.903523	0.853407	0.920083	0.989177
11.15	0.336005	0.487363	0.596442	0.731192	0.757453	0.775678	0.837343	0.880696	0.499263	0.606281	0.723364	0.787144	0.907074	0.854198	0.918539	0.983577
11.25	0.339877	0.492328	0.59838	0.734368	0.762799	0.774	0.843005	0.881355	0.499763	0.606834	0.732636	0.787244	0.912446	0.855625	0.922825	0.982371
11.35	0.341774	0.493969	0.603955	0.738801	0.761277	0.772697	0.842465	0.886015	0.504514	0.606896	0.729222	0.794246	0.913706	0.860142	0.929873	0.985639
11.45	0.346669	0.49412	0.60967	0.737795	0.765697	0.782519	0.841207	0.883505	0.505343	0.612792	0.733507	0.789813	0.915401	0.855525	0.928178	0.986937
11.55	0.350031	0.501185	0.611222	0.745372	0.764914	0.779278	0.842832	0.883068	0.507529	0.614347	0.739584	0.797565	0.919171	0.863157	0.924341	0.986076
11.65	0.352568	0.504992	0.615553	0.751036	0.771482	0.781539	0.848855	0.888657	0.51295	0.620615	0.738545	0.795695	0.921079	0.86222	0.930253	0.991014
11.75	0.355636	0.507475	0.613939	0.751325	0.766711	0.784934	0.847363	0.887467	0.511852	0.618127	0.741643	0.803842	0.923812	0.864911	0.926119	0.988124
11.85	0.359325	0.508479	0.621157	0.754514	0.777513	0.790398	0.849181	0.889728	0.518295	0.622868	0.74456	0.805321	0.923407	0.867852	0.930445	0.991168
11.95	0.359149	0.513981	0.620348	0.75683	0.779586	0.786135	0.846691	0.889841	0.521431	0.623419	0.746538	0.810318	0.924006	0.861367	0.927925	0.989643
12.05	0.362525	0.519618	0.62354	0.760678	0.775673	0.788207	0.851774	0.893568	0.521982	0.625165	0.744295	0.810669	0.932013	0.868491	0.925555	0.989943
12.15	0.366762	0.518244	0.622204	0.759836	0.781744	0.791653	0.851291	0.890211	0.5239	0.627151	0.745464	0.813791	0.933807	0.865005	0.931487	0.992714
12.25	0.373087	0.523177	0.623996	0.763816	0.7808	0.79606	0.851232	0.89179	0.524985	0.633519	0.744425	0.817804	0.940847	0.865032	0.929962	0.998411
12.35	0.373483	0.524364	0.624949	0.765573	0.784386	0.795396	0.853739	0.898293	0.530023	0.634121	0.749655	0.82394	0.936152	0.865197	0.9332	0.994851
12.45	0.37544	0.52767	0.626104	0.770284	0.783687	0.792163	0.851154	0.897805	0.528334	0.636274	0.753424	0.824248	0.938381	0.865078	0.931638	0.997221
12.55	0.376028	0.531931	0.627601	0.772691	0.78811	0.797118	0.857117	0.897014	0.532559	0.636725	0.755583	0.828813	0.944372	0.868767	0.929533	0.99222
12.65	0.377259	0.530894	0.634094	0.77397	0.792787	0.799301	0.860736	0.893414	0.531906	0.637486	0.755195	0.829936	0.950681	0.869519	0.933591	0.997051
12.75	0.382847	0.53348	0.637078	0.775708	0.792384	0.80042	0.85542	0.891973	0.535978	0.640308	0.756714	0.833959	0.946444	0.870674	0.928375	0.990739
12.85	0.385108	0.541297	0.637602	0.773555	0.793307	0.799727	0.859576	0.894534	0.533979	0.6368	0.756789	0.834067	0.946919	0.865653	0.934695	0.998268
12.95	0.389736	0.540822	0.639588	0.774086	0.792997	0.802012	0.863718	0.895333	0.539252	0.642583	0.760203	0.833314	0.95196	0.870224	0.93123	1
13.05	0.393042	0.542722	0.645039	0.776229	0.798127	0.8013	0.862547	0.894118	0.542271	0.64682	0.760953	0.836725	0.951177	0.877269	0.937275	0.99857
13.15	0.395643	0.542366	0.646361	0.775711	0.797557	0.795857	0.861702	0.90063	0.54242	0.647165	0.766307	0.842068	0.953527	0.872517	0.934717	0.992218
13.25	0.396059	0.544192	0.647224	0.780916	0.799314	0.805267	0.861435	0.896666	0.545509	0.649966	0.760745	0.848782	0.952615	0.878136	0.936306	0.990777
13.35	0.396029	0.552528	0.651685	0.787114	0.798129	0.80354	0.863936	0.896118	0.545469	0.645589	0.763576	0.846407	0.961925	0.873411	0.933632	0.994679
13.45	0.400838	0.552485	0.649491	0.786801	0.798496	0.805461	0.864123	0.897772	0.551225	0.652888	0.763212	0.846912	0.958244	0.874552	0.936821	0.987258
13.55	0.40291	0.552034	0.653552	0.781672	0.803675	0.806433	0.862145	0.895244	0.554452	0.648414	0.769807	0.84702	0.962171	0.877302	0.929733	0.991327
13.65	0.407516	0.558491	0.659052	0.786818	0.808035	0.812191	0.866662	0.901779	0.553343	0.6526	0.770667	0.849694	0.960036	0.879307	0.932328	0.984282
13.75	0.407983	0.555893	0.660358	0.789489	0.805299	0.804641	0.861559	0.898692	0.550623	0.656925	0.770381	0.851057	0.958074	0.875108	0.935523	0.979311
13.85	0.414883	0.559884	0.664737	0.792503	0.806732	0.807307	0.866122	0.899294	0.553726	0.654818	0.772451	0.849699	0.966985	0.875124	0.938122	0.984926
13.95	0.413501	0.561144	0.663134	0.794371	0.808535	0.807024	0.86524	0.901542	0.556244	0.655735	0.769361	0.853537	0.965544	0.873386	0.930639	0.981807
14.05	0.419716	0.562974	0.66872	0.797968	0.809058	0.805804	0.866821	0.89635	0.557936	0.651917	0.771277	0.851804	0.960881	0.875783	0.933073	0.987182
14.15	0.417357	0.565483	0.670504	0.800072	0.809053	0.81116	0.867115	0.89553	0.559112	0.657894	0.774831	0.853925	0.965587	0.872903	0.927941	0.982881
14.25	0.42008	0.566055	0.674735	0.803742	0.812115	0.809981	0.866789	0.898217	0.563114	0.66165	0.778255	0.851645	0.963471	0.872418	0.931254	0.987895
14.35	0.422916	0.572146	0.672277	0.800599	0.814916	0.81112	0.869295	0.898228	0.564325	0.661723	0.77961	0.856761	0.967397	0.873111	0.935755	0.985067
14.45	0.428203	0.574175	0.676022	0.802593	0.814288	0.811201	0.86932	0.894742	0.56323	0.663903	0.780951	0.855382	0.964909	0.875993	0.937863	0.987628
14.55	0.427582	0.572877	0.681697	0.806389	0.811856	0.812215	0.867636	0.896658	0.564925	0.660039	0.783504	0.850115	0.972174	0.876198	0.930105	0.989317
14.65	0.427579	0.575548	0.680302	0.806057	0.81429	0.814922	0.86602	0.896976	0.56965	0.665004	0.779033	0.847692	0.96706	0.872874	0.937553	0.990855
14.75	0.432795	0.57965	0.684047	0.809034	0.81446	0.813883	0.873546	0.89716	0.572434	0.663528	0.780484	0.852535	0.97678	0.878921	0.936006	0.987647
14.85	0.435885	0.581312	0.691015	0.804876	0.812598	0.81041	0.870194	0.903528	0.569442	0.662643	0.785606	0.851726	0.969813	0.873157	0.935928	0.985115
14.95	0.438003	0.581628	0.688284	0.812426	0.817453	0.811719	0.87099	0.900624	0.570653	0.663785	0.779391	0.8494	0.975579	0.873653	0.937658	0.987487
15.05	0.435917	0.581363	0.69244	0.812507	0.818829	0.812712	0.869997	0.894235	0.573371	0.670749	0.783096	0.848296	0.978993	0.872431	0.936757	0.991972
15.15	0.440677	0.585093	0.692647	0.813395	0.814898	0.815122	0.868119	0.897103	0.5772	0.664511	0.784826	0.847406	0.975417	0.878834	0.933389	0.984549
15.25	0.44316	0.587851	0.692914	0.810102	0.818953	0.814393	0.871465	0.898091	0.576077	0.666502	0.783158	0.850298	0.975644	0.873864	0.937016	0.98599
15.35	0.445759	0.587144	0.694693	0.81843	0.824188	0.81262	0.870472	0.89948	0.577151	0.666918	0.787195	0.851038	0.971499	0.876746	0.934409	0.989535
15.45	0.446398	0.588911	0.698184	0.820567	0.816649	0.811913	0.871492	0.898207	0.574391	0.67103	0.783455	0.854319	0.97569	0.879819	0.937941	0.984203
15.55	0.44771	0.59111	0.69775	0.812439	0.825203	0.811997	0.869166	0.894348	0.579086	0.667633	0.787786	0.852681	0.976953	0.875783	0.935944	0.983513
15.65	0.45111	0.592692	0.701261	0.815694	0.827397	0.808891	0.871327	0.897146	0.579437	0.671184	0.786693	0.847859	0.974044	0.875434	0.933303	0.985655
15.75	0.451585	0.594788	0.70224	0.814328	0.822942	0.812372	0.868796	0.895211	0.581822	0.67324	0.789756	0.849249	0.976623	0.876141	0.933726	0.984918
15.85	0.457259	0.59709	0.69992	0.813273	0.827459	0.813778	0.866322	0.896965	0.580273	0.674168	0.791853	0.850976	0.978221	0.872504	0.938751	0.989484
15.95	0.456674	0.594899	0.699064	0.819471	0.822	0.81456	0.871233	0.89768	0.58312	0.668974	0.792784	0.851934	0.973563	0.875532	0.935634	0.988464
16.05	0.461374	0.594087	0.70377	0.819852	0.82343	0.818546	0.867506	0.897208	0.586242	0.672417	0.786181	0.85879	0.982776	0.878451	0.936133	0.981737
16.15	0.46077	0.603806	0.704129	0.81925	0.827953	0.811033	0.869857	0.896018	0.584896	0.675321	0.788075	0.855809	0.974861	0.874522	0.933437	0.985145
16.25	0.461582	0.599262	0.708868	0.820138	0.823357	0.81139	0.870842	0.893814	0.587122	0.67698	0.790301	0.856081	0.969923	0.876991	0.936457	0.98205
16.35	0.46155	0.601308	0.705945	0.821136	0.828765	0.811095	0.872709	0.896876	0.586666	0.671184	0.786877	0.856472	0.973377	0.87826	0.933354	0.984492
16.45	0.462907	0.599516	0.705227	0.820729	0.829129	0.813006	0.866894	0.892723	0.589791	0.676821	0.791972	0.856583	0.967346	0.875896	0.933357	0.983947
16.55	0.466496	0.601383	0.707807	0.823516	0.826684	0.815327	0.872148	0.891555	0.59169	0.675339	0.79419	0.860366	0.972438	0.874566	0.936541	0.986826
16.65	0.467114	0.607671	0.710694	0.820548	0.83003	0.810766	0.865723	0.89601	0.587338	0.677892	0.796249	0.852943	0.967789	0.875521	0.933977	0.989096
16.75	0.467756	0.606392	0.711806	0.819633	0.830694	0.811716	0.870723	0.89444	0.591674	0.678602	0.793129	0.854678	0.972435	0.872585	0.936681	0.986038
16.85	0.468938	0.608329	0.712751	0.82537	0.827041	0.815413	0.866538	0.890519	0.589478	0.679935	0.792074	0.859503	0.968166	0.870496	0.937871	0.985685
16.95	0.472149	0.614395	0.71128	0.823886	0.828902	0.812488	0.865793	0.89149	0.591636	0.67769	0.792357	0.856081	0.970139	0.870855	0.935005	0.978761
17.05	0.476065	0.613783	0.71532	0.825686	0.828088	0.810116	0.865067	0.890217	0.593393	0.677077	0.792107	0.857881	0.96866	0.868718	0.933659	0.984873
17.15	0.474734	0.612131	0.716512	0.826263	0.82846	0.81004	0.867118	0.891269	0.591879	0.676311	0.799101	0.855909	0.970101	0.870626	0.933858	0.984902
17.25	0.474265	0.612336	0.717416	0.827016	0.829847	0.809619	0.867188	0.889515	0.591175	0.676619	0.794592	0.852247	0.963277	0.867658	0.931597	0.982309
17.35	0.481311	0.616656	0.7191	0.824223	0.826817	0.810197	0.870302	0.886709	0.59638	0.680825	0.792482	0.858321	0.964696	0.872731	0.932515	0.983915
17.45	0.482533	0.615574	0.717694	0.826007	0.827445	0.81411	0.866856	0.891153	0.594324	0.679571	0.798529	0.859975	0.967767	0.867404	0.926637	0.974907
17.55	0.479929	0.61745	0.720117	0.830203	0.823622	0.811759	0.864503	0.889197	0.597149	0.68194	0.801219	0.855998	0.967379	0.869123	0.92439	0.981356
17.65	0.483996	0.615917	0.720379	0.826919	0.823319	0.814706	0.864096	0.8816	0.595471	0.67589	0.796759	0.857509	0.963684	0.869387	0.925779	0.977387
17.75	0.483566	0.615828	0.720913	0.826015	0.833123	0.809744	0.864635	0.889922	0.600744	0.680399	0.791078	0.860083	0.960927	0.864163	0.920633	0.975069
17.85	0.486322	0.617601	0.72223	0.826164	0.83227	0.810397	0.86473	0.885036	0.599154	0.679228	0.795631	0.860817	0.96356	0.869549	0.920404	0.98181
17.95	0.488901	0.619444	0.724484	0.826992	0.831606	0.815221	0.859819	0.884132	0.599683	0.677749	0.797795	0.857314	0.962324	0.866999	0.922487	0.970619
18.05	0.490124	0.624903	0.724365	0.830098	0.829547	0.814398	0.862933	0.880413	0.599751	0.68103	0.796907	0.859406	0.958096	0.864465	0.92127	0.971731
18.15	0.490291	0.622458	0.723952	0.822383	0.827799	0.812242	0.860604	0.884269	0.595023	0.679886	0.798227	0.859935	0.961847	0.863515	0.922366	0.973296
18.25	0.492434	0.625364	0.726691	0.829869	0.831636	0.811808	0.862841	0.882693	0.600366	0.679282	0.796346	0.859112	0.968342	0.867461	0.92045	0.972298
18.35	0.498327	0.621983	0.723126	0.828881	0.825926	0.81004	0.861948	0.878138	0.597929	0.681986	0.796079	0.867539	0.964591	0.864341	0.920501	0.97162
18.45	0.496371	0.624409	0.722597	0.83155	0.833136	0.814989	0.863888	0.881528	0.600107	0.681287	0.796929	0.859023	0.959893	0.863335	0.918645	0.969386
18.55	0.496999	0.625391	0.727066	0.831609	0.831925	0.813656	0.862417	0.877596	0.603458	0.680655	0.796008	0.863944	0.961229	0.85973	0.917295	0.966672
18.65	0.499012	0.626981	0.728197	0.830576	0.82986	0.814169	0.863839	0.880405	0.602255	0.68028	0.794179	0.854948	0.961555	0.860652	0.918701	0.968515
18.75	0.499933	0.62483	0.726631	0.828859	0.829655	0.809719	0.859827	0.879598	0.600477	0.680558	0.791594	0.855598	0.961947	0.862074	0.91708	0.967346
18.85	0.501031	0.626112	0.730018	0.83149	0.830527	0.807731	0.859619	0.874528	0.602436	0.6814	0.796621	0.858763	0.958336	0.855965	0.919924	0.964561
18.95	0.498923	0.630165	0.73055	0.826817	0.831919	0.808451	0.858896	0.87728	0.599724	0.680909	0.791591	0.858826	0.962921	0.857846	0.924597	0.959504
19.05	0.500696	0.629747	0.727714	0.830953	0.834858	0.807963	0.86249	0.876087	0.598598	0.682072	0.79185	0.861767	0.959432	0.855817	0.921411	0.957637
19.15	0.506681	0.629264	0.730779	0.832397	0.833053	0.805075	0.860982	0.873999	0.605825	0.68782	0.793914	0.859311	0.96278	0.859006	0.922914	0.961685
19.25	0.505796	0.63071	0.727357	0.83108	0.828619	0.806864	0.85698	0.878457	0.601815	0.683057	0.795728	0.861524	0.959807	0.861985	0.922382	0.972106
19.35	0.506911	0.628494	0.735156	0.828751	0.82883	0.810375	0.85964	0.869849	0.601286	0.676942	0.799538	0.855639	0.962154	0.856532	0.922296	0.967524
19.45	0.504226	0.631973	0.734918	0.82979	0.834218	0.811112	0.856956	0.867733	0.607916	0.685742	0.794951	0.860998	0.959054	0.852136	0.922676	0.961428
19.55	0.504749	0.62989	0.734613	0.832842	0.830281	0.806867	0.856726	0.870353	0.606837	0.681033	0.798704	0.857833	0.963687	0.854635	0.923639	0.966736
19.65	0.510006	0.631584	0.739527	0.833857	0.831895	0.806889	0.853097	0.873208	0.606348	0.683	0.794503	0.85844	0.959861	0.857231	0.921807	0.957429
19.75	0.509159	0.637896	0.733078	0.829653	0.830384	0.807407	0.857822	0.872717	0.603955	0.678904	0.796831	0.857417	0.957097	0.851005	0.913161	0.953751
19.85	0.512955	0.636258	0.740734	0.832508	0.832983	0.801923	0.852023	0.872439	0.602573	0.681924	0.799182	0.856499	0.961992	0.855628	0.921184	0.954332
19.95	0.51489	0.633573	0.735043	0.83053	0.827696	0.804983	0.855925	0.869765	0.604924	0.679034	0.800013	0.860358	0.956774	0.848777	0.916804	0.95043
20.05	0.512235	0.631743	0.735882	0.833185	0.829645	0.804047	0.852449	0.868586	0.604635	0.678594	0.801395	0.854689	0.956873	0.848204	0.915943	0.949496
20.15	0.515074	0.633613	0.735364	0.83224	0.829296	0.808362	0.853817	0.872928	0.608809	0.678675	0.79685	0.855523	0.955848	0.848007	0.91617	0.947637
20.25	0.515705	0.63598	0.736818	0.838301	0.828862	0.804619	0.852938	0.867857	0.604535	0.679139	0.797792	0.855353	0.959626	0.852506	0.916672	0.947429
20.35	0.516131	0.635389	0.739643	0.829855	0.8341	0.803043	0.851993	0.867703	0.607689	0.68096	0.796143	0.850406	0.959367	0.850889	0.913218	0.949607
20.45	0.51911	0.637548	0.738745	0.83251	0.835095	0.80739	0.856597	0.866357	0.608167	0.681111	0.800774	0.856049	0.960524	0.851548	0.918	0.945715
20.55	0.520252	0.634809	0.740318	0.834453	0.833565	0.806797	0.852908	0.868311	0.608251	0.679077	0.803507	0.850253	0.957386	0.848113	0.91274	0.947683
20.65	0.52169	0.637426	0.735134	0.830837	0.829607	0.803024	0.848177	0.863774	0.605757	0.68089	0.796556	0.85562	0.959483	0.846701	0.918472	0.935755
20.75	0.521606	0.637186	0.74035	0.831107	0.825686	0.805475	0.84849	0.863974	0.609972	0.676859	0.796491	0.851515	0.956757	0.842432	0.91189	0.943484
20.85	0.523015	0.637553	0.740005	0.832089	0.828252	0.801006	0.848493	0.859746	0.607833	0.67776	0.796902	0.847473	0.954968	0.845061	0.909125	0.942429
20.95	0.522216	0.638422	0.738864	0.833506	0.832073	0.80147	0.849818	0.858591	0.608753	0.679579	0.796964	0.850541	0.954429	0.840112	0.913769	0.941956
21.05	0.521345	0.636255	0.740895	0.831892	0.828463	0.804231	0.847994	0.865415	0.605042	0.677088	0.797163	0.851332	0.955435	0.842616	0.908758	0.939442
21.15	0.521094	0.638859	0.737655	0.831779	0.832678	0.801732	0.848644	0.859076	0.60732	0.678086	0.795903	0.846094	0.957178	0.841359	0.904864	0.942059
21.25	0.524809	0.636557	0.738143	0.833163	0.829005	0.803891	0.847624	0.85998	0.608618	0.677536	0.797754	0.847738	0.956218	0.83856	0.908256	0.943308
21.35	0.524067	0.638047	0.73793	0.8341	0.828349	0.798515	0.845873	0.854708	0.605102	0.678103	0.796861	0.845304	0.957613	0.83761	0.911081	0.943047
21.45	0.525055	0.641048	0.737217	0.831779	0.826296	0.796921	0.844602	0.856718	0.607814	0.677571	0.795056	0.847082	0.949013	0.835179	0.904877	0.940221
21.55	0.529926	0.639062	0.736017	0.835012	0.824858	0.80031	0.846583	0.856375	0.604403	0.676095	0.800536	0.846912	0.954299	0.833123	0.908782	0.934827
21.65	0.528995	0.640373	0.737757	0.832993	0.824809	0.796885	0.842028	0.857352	0.610401	0.67416	0.794063	0.845587	0.953355	0.836766	0.906477	0.937256
21.75	0.528725	0.643398	0.738367	0.826312	0.824747	0.796856	0.839745	0.85739	0.60919	0.677258	0.799781	0.845903	0.950913	0.837165	0.905161	0.93374
21.85	0.531834	0.64193	0.738658	0.833474	0.823112	0.799997	0.841439	0.856705	0.603844	0.677328	0.796548	0.846378	0.952939	0.83152	0.907317	0.934574
21.95	0.529597	0.641679	0.741691	0.83424	0.824472	0.79531	0.841734	0.853356	0.607212	0.673758	0.798383	0.844165	0.951536	0.832003	0.900695	0.928866
22.05	0.529982	0.63982	0.736516	0.836364	0.825095	0.799085	0.841618	0.854322	0.603094	0.677639	0.798842	0.8388	0.949172	0.832011	0.89995	0.929231
22.15	0.533855	0.642764	0.736076	0.831231	0.823093	0.79681	0.841844	0.849872	0.606294	0.674479	0.795784	0.842959	0.950416	0.82986	0.89478	0.932534
22.25	0.533677	0.643862	0.737989	0.833298	0.825135	0.792357	0.836426	0.847738	0.605747	0.67722	0.797158	0.844845	0.946719	0.830883	0.894572	0.924279
22.35	0.534211	0.638341	0.736065	0.829002	0.816233	0.792849	0.840746	0.851119	0.60725	0.673094	0.797225	0.84389	0.942715	0.824634	0.895138	0.925094
22.45	0.534044	0.642103	0.733213	0.830246	0.827418	0.797984	0.834828	0.849276	0.606616	0.673977	0.795077	0.839899	0.943789	0.829761	0.892972	0.92769
22.55	0.536594	0.644771	0.733801	0.828285	0.818006	0.794395	0.835028	0.845096	0.608316	0.672746	0.796208	0.844114	0.939482	0.826307	0.889966	0.923359
22.65	0.532773	0.639345	0.737674	0.829466	0.818079	0.792063	0.833085	0.848461	0.603094	0.669619	0.796694	0.847176	0.942906	0.830597	0.885581	0.920015
22.75	0.533013	0.642869	0.739136	0.830233	0.821819	0.79148	0.831623	0.845646	0.607177	0.668593	0.800455	0.840889	0.942073	0.822057	0.889269	0.917905
22.85	0.5375	0.64308	0.737835	0.830047	0.819091	0.79242	0.835819	0.846707	0.604522	0.66882	0.797155	0.836728	0.940327	0.823487	0.891458	0.9231
22.95	0.541772	0.641266	0.736602	0.827783	0.817415	0.792935	0.831714	0.842489	0.604368	0.669657	0.792625	0.83992	0.9381	0.82261	0.887923	0.922506
23.05	0.5394	0.648147	0.738861	0.831933	0.822572	0.788326	0.83261	0.839742	0.606389	0.670515	0.793488	0.83342	0.937512	0.824075	0.88595	0.922514
23.15	0.53678	0.645106	0.737978	0.830249	0.818721	0.790193	0.832011	0.841504	0.608826	0.669835	0.793423	0.837368	0.935791	0.821619	0.892219	0.914508
23.25	0.539713	0.642642	0.743262	0.826058	0.818524	0.78383	0.829839	0.838682	0.605544	0.667989	0.790773	0.837224	0.93357	0.815569	0.883783	0.918431
23.35	0.537924	0.642753	0.741686	0.828452	0.815265	0.787875	0.829518	0.839345	0.606348	0.67195	0.793574	0.837052	0.931389	0.8183	0.880891	0.918431
23.45	0.541521	0.644995	0.742309	0.82591	0.812698	0.789508	0.830316	0.836329	0.607061	0.667212	0.787266	0.83268	0.927255	0.818505	0.880346	0.914122
23.55	0.54073	0.643751	0.73905	0.829108	0.814579	0.786928	0.825729	0.838083	0.604802	0.668062	0.788072	0.832939	0.929401	0.816368	0.881455	0.914368
23.65	0.539454	0.646167	0.741918	0.826293	0.811635	0.78801	0.824515	0.831023	0.603868	0.667946	0.791761	0.829377	0.926986	0.815502	0.881144	0.912557
23.75	0.540326	0.646612	0.737757	0.827089	0.813824	0.783382	0.826277	0.836504	0.604176	0.665299	0.790231	0.82822	0.927131	0.814474	0.879447	0.912503
23.85	0.542695	0.646871	0.739012	0.825508	0.813103	0.782257	0.825144	0.833838	0.603744	0.669079	0.784284	0.831428	0.924654	0.808748	0.878608	0.909807
23.95	0.53865	0.645551	0.741945	0.824356	0.815513	0.788132	0.826757	0.832192	0.606408	0.667026	0.787473	0.830905	0.921632	0.812663	0.879344	0.908776
24.05	0.541205	0.645371	0.736902	0.826007	0.8134	0.784961	0.826541	0.826404	0.607201	0.668251	0.779672	0.829947	0.921737	0.80755	0.877801	0.905735
24.15	0.545237	0.644237	0.740885	0.825543	0.816838	0.78063	0.82442	0.827275	0.602579	0.666775	0.778447	0.830087	0.922579	0.807857	0.876719	0.909257
24.25	0.544222	0.644105	0.73712	0.823751	0.814406	0.781712	0.823999	0.829248	0.604006	0.665374	0.774669	0.829016	0.921429	0.808575	0.876257	0.903339
24.35	0.545455	0.644955	0.738899	0.825613	0.816576	0.782476	0.818179	0.829744	0.605768	0.662071	0.774359	0.826455	0.922584	0.802833	0.871827	0.902416
24.45	0.543585	0.643884	0.740143	0.824337	0.813052	0.77839	0.82142	0.821333	0.602252	0.661434	0.772349	0.826123	0.922225	0.805407	0.873405	0.901229
24.55	0.545272	0.6454	0.73525	0.822996	0.81082	0.780147	0.817434	0.824928	0.605166	0.664333	0.770997	0.822421	0.920409	0.801289	0.874255	0.900811
24.65	0.546241	0.643109	0.733844	0.81915	0.81344	0.782141	0.817623	0.819577	0.604325	0.661559	0.77179	0.822745	0.920466	0.804981	0.866257	0.897815
24.75	0.543564	0.642027	0.73804	0.821895	0.81085	0.782711	0.817073	0.825842	0.601173	0.660814	0.767753	0.82499	0.916003	0.80113	0.866492	0.89829
24.85	0.54691	0.644278	0.732854	0.820861	0.815165	0.780136	0.813834	0.826817	0.602241	0.660868	0.772332	0.821304	0.918507	0.800388	0.860318	0.895921
24.95	0.543761	0.643762	0.739109	0.821015	0.809387	0.77828	0.812043	0.823257	0.601985	0.657875	0.766701	0.820829	0.912597	0.795131	0.863656	0.893973
25.05	0.548734	0.641172	0.737609	0.821239	0.813656	0.77995	0.813055	0.821239	0.604006	0.664438	0.765678	0.82367	0.914832	0.799187	0.859708	0.894356
25.15	0.550588	0.639245	0.735307	0.821401	0.808556	0.775209	0.809484	0.821592	0.603291	0.6573	0.76768	0.820904	0.916033	0.795566	0.857973	0.890915
25.25	0.551567	0.646839	0.738677	0.821876	0.805842	0.771852	0.813645	0.820049	0.602495	0.657249	0.766892	0.82092	0.912166	0.793669	0.864419	0.890163
25.35	0.547851	0.648617	0.733898	0.820451	0.811419	0.771871	0.811363	0.817518	0.602344	0.655714	0.766344	0.819547	0.912322	0.793661	0.861899	0.889966
25.45	0.550572	0.647276	0.737474	0.816768	0.812793	0.773919	0.809873	0.814776	0.604138	0.657603	0.770122	0.819148	0.90814	0.795212	0.856737	0.888719
25.55	0.548623	0.645357	0.73419	0.819293	0.810731	0.774316	0.80936	0.816123	0.600881	0.655322	0.763641	0.819768	0.91291	0.791812	0.856753	0.88775
25.65	0.554328	0.641987	0.734541	0.813767	0.80905	0.769917	0.810909	0.815785	0.600344	0.659821	0.76866	0.815885	0.907586	0.792859	0.854886	0.885214
25.75	0.553718	0.64359	0.734255	0.818066	0.809139	0.771558	0.80436	0.813632	0.601408	0.656685	0.766962	0.814943	0.907584	0.788348	0.85454	0.882075
25.85	0.549212	0.643528	0.736632	0.815348	0.80704	0.770411	0.809231	0.814174	0.607312	0.65386	0.764655	0.815923	0.902975	0.788507	0.853367	0.884024
25.95	0.54671	0.641541	0.731988	0.816398	0.809598	0.767162	0.811193	0.813122	0.599475	0.659114	0.763557	0.811587	0.906968	0.786359	0.851567	0.882391
26.05	0.551295	0.64764	0.732501	0.815413	0.807512	0.768832	0.807774	0.814595	0.598142	0.656221	0.76224	0.811398	0.901005	0.792703	0.856715	0.881889
26.15	0.55229	0.643123	0.738456	0.816063	0.809822	0.768951	0.808769	0.812528	0.599896	0.654785	0.759839	0.814085	0.903129	0.788264	0.850973	0.875982
26.25	0.550836	0.646558	0.735809	0.810952	0.807701	0.770673	0.802514	0.813567	0.596216	0.65261	0.760322	0.812291	0.901677	0.787158	0.852535	0.876767
26.35	0.545944	0.646091	0.738524	0.813659	0.799948	0.766142	0.798683	0.809325	0.601076	0.649944	0.757933	0.81051	0.894987	0.787754	0.84848	0.874431
26.45	0.552979	0.644758	0.731842	0.812706	0.802701	0.76489	0.804727	0.808875	0.598102	0.653242	0.761485	0.811446	0.895727	0.784127	0.843817	0.878157
26.55	0.552798	0.642729	0.736662	0.812337	0.803453	0.764968	0.802628	0.814223	0.595992	0.648906	0.758049	0.808837	0.896787	0.784416	0.846982	0.871751
26.65	0.552922	0.643584	0.737328	0.81677	0.801535	0.765079	0.800113	0.80765	0.598793	0.650929	0.761247	0.810621	0.8955	0.785228	0.842354	0.870615
26.75	0.554635	0.642205	0.733596	0.810904	0.801381	0.767073	0.799535	0.806845	0.598901	0.650346	0.760168	0.804943	0.891617	0.779942	0.841429	0.87629
26.85	0.55429	0.64258	0.737328	0.809997	0.798877	0.76707	0.795852	0.808079	0.596326	0.649397	0.756541	0.804455	0.888994	0.778703	0.844327	0.871273
26.95	0.555526	0.641787	0.733707	0.809841	0.800847	0.761118	0.797511	0.800102	0.59464	0.652049	0.760246	0.810815	0.884612	0.779955	0.83937	0.866333
27.05	0.551899	0.641647	0.73253	0.808861	0.798661	0.762402	0.798426	0.799047	0.597446	0.649156	0.759499	0.8033	0.88646	0.775465	0.834318	0.866721
27.15	0.554563	0.643142	0.736195	0.807056	0.800644	0.761371	0.793572	0.802949	0.5959	0.647848	0.759995	0.801756	0.881455	0.775587	0.835597	0.861313
27.25	0.551181	0.645136	0.735739	0.808594	0.799168	0.759485	0.797547	0.800445	0.594775	0.646701	0.757998	0.798993	0.884903	0.773557	0.836598	0.866924
27.35	0.556867	0.640621	0.730752	0.808734	0.797452	0.754512	0.792514	0.803022	0.593452	0.647497	0.75608	0.79919	0.88176	0.772907	0.833552	0.867272
27.45	0.553793	0.642467	0.729071	0.806746	0.801834	0.757024	0.790881	0.804455	0.595657	0.645549	0.756528	0.798259	0.880208	0.770214	0.835079	0.862825
27.55	0.555785	0.640252	0.728156	0.811292	0.793547	0.756336	0.792179	0.794497	0.591806	0.644569	0.754358	0.803033	0.875151	0.771401	0.833155	0.86269
27.65	0.555728	0.642257	0.732004	0.811268	0.797708	0.755535	0.795712	0.793739	0.595034	0.650228	0.754153	0.803788	0.878206	0.772343	0.830341	0.858901
27.75	0.555896	0.638228	0.732752	0.807639	0.797239	0.755292	0.789597	0.794322	0.593293	0.642243	0.750054	0.797309	0.869306	0.768093	0.826258	0.860696
27.85	0.551484	0.639528	0.73086	0.807733	0.795145	0.755497	0.790077	0.79141	0.591283	0.643336	0.753756	0.800399	0.874018	0.767165	0.831048	0.85732
27.95	0.556039	0.642731	0.726963	0.810669	0.798588	0.758041	0.78437	0.788472	0.596178	0.645465	0.750672	0.796265	0.871538	0.767807	0.832267	0.859659
28.05	0.555151	0.64353	0.731249	0.805782	0.789222	0.754328	0.787554	0.792784	0.589216	0.640397	0.750062	0.792174	0.870677	0.761474	0.829744	0.858407
28.15	0.554706	0.63962	0.728949	0.805542	0.794214	0.754787	0.784222	0.794457	0.589723	0.641018	0.748189	0.796216	0.868038	0.760003	0.822874	0.855112
28.25	0.557202	0.637521	0.728998	0.807525	0.795733	0.747871	0.785474	0.788588	0.589766	0.637251	0.746948	0.79572	0.871778	0.761458	0.821533	0.851615
28.35	0.560383	0.637613	0.726526	0.802552	0.792401	0.748894	0.789073	0.791858	0.589081	0.638711	0.748675	0.792989	0.871508	0.760996	0.819663	0.852301
28.45	0.55867	0.639018	0.727395	0.806889	0.788526	0.756023	0.786923	0.780239	0.589599	0.643689	0.744304	0.792179	0.867129	0.761903	0.821355	0.854376
28.55	0.557077	0.635052	0.732811	0.804851	0.79103	0.751031	0.77798	0.788072	0.590379	0.639445	0.746166	0.797563	0.861173	0.758314	0.822653	0.853291
28.65	0.556872	0.638344	0.726707	0.801341	0.788688	0.746905	0.780463	0.78892	0.592851	0.641865	0.749579	0.792287	0.869617	0.757801	0.825937	0.847557
28.75	0.557164	0.639968	0.730515	0.804519	0.788666	0.747946	0.783051	0.785274	0.592484	0.637834	0.742223	0.788375	0.863777	0.757904	0.81949	0.84777
28.85	0.556279	0.634329	0.727789	0.804754	0.792889	0.747156	0.780263	0.787276	0.588603	0.636317	0.745996	0.788048	0.866578	0.755456	0.816446	0.846782
28.95	0.555081	0.638222	0.727392	0.800388	0.790053	0.746327	0.781704	0.781963	0.592465	0.635599	0.740132	0.785377	0.868257	0.756773	0.81507	0.839526
29.05	0.558605	0.636539	0.726421	0.800685	0.788828	0.743926	0.776588	0.783946	0.58917	0.635737	0.74072	0.789991	0.865512	0.753732	0.815648	0.844081
29.15	0.559161	0.638929	0.727654	0.797992	0.787276	0.746519	0.776655	0.779734	0.589367	0.634194	0.73987	0.788159	0.866405	0.751608	0.817607	0.846383
29.25	0.55663	0.636358	0.728555	0.801724	0.784189	0.747161	0.77733	0.778158	0.588995	0.63346	0.74154	0.78644	0.857522	0.751624	0.815435	0.843712
29.35	0.559433	0.638935	0.726464	0.800261	0.787363	0.745545	0.779197	0.777975	0.589734	0.63438	0.73898	0.785436	0.862441	0.749547	0.816457	0.840913
29.45	0.556462	0.636646	0.725868	0.799886	0.784931	0.74823	0.775994	0.780382	0.584774	0.633365	0.738059	0.787894	0.86137	0.75201	0.811341	0.837948
29.55	0.559139	0.633271	0.727317	0.800129	0.788677	0.739581	0.775994	0.776876	0.586256	0.6336	0.739403	0.787287	0.858888	0.752358	0.812898	0.842746
29.65	0.55596	0.633684	0.723882	0.797236	0.783024	0.742685	0.770562	0.775576	0.587519	0.633187	0.735763	0.779937	0.855366	0.75014	0.811211	0.839882
29.75	0.558634	0.637135	0.72511	0.80038	0.782319	0.741057	0.771485	0.775851	0.589227	0.632046	0.736071	0.785619	0.857892	0.747925	0.807388	0.83312
29.85	0.560461	0.63741	0.727174	0.800183	0.783528	0.743116	0.773932	0.775155	0.584229	0.632612	0.735064	0.779572	0.857215	0.74582	0.806665	0.833595
29.95	0.558529	0.638379	0.724332	0.797234	0.782651	0.740644	0.771714	0.772467	0.586388	0.628241	0.729781	0.780411	0.855064	0.749037	0.81163	0.830152
30.05	0.560038	0.630343	0.726648	0.798151	0.781828	0.738413	0.774005	0.778981	0.582872	0.633894	0.729408	0.776949	0.851086	0.747569	0.808807	0.834432
30.15	0.56122	0.635891	0.720895	0.794737	0.783901	0.739231	0.76706	0.768698	0.585157	0.624355	0.728051	0.775935	0.854279	0.744042	0.80891	0.830681
30.25	0.556667	0.633945	0.722775	0.792522	0.78117	0.731896	0.767097	0.772845	0.581747	0.630235	0.729038	0.775932	0.853286	0.744298	0.804565	0.825869
30.35	0.563025	0.636169	0.724359	0.794373	0.778827	0.735736	0.766237	0.768681	0.582486	0.627137	0.730819	0.776358	0.850566	0.742172	0.804063	0.826576
30.45	0.556894	0.633953	0.715673	0.795029	0.777767	0.736478	0.766174	0.769718	0.582761	0.627313	0.728833	0.771229	0.852371	0.738421	0.801003	0.825268
30.55	0.560208	0.635408	0.719378	0.79215	0.777535	0.736343	0.764464	0.768204	0.583673	0.624595	0.731116	0.769896	0.853833	0.740609	0.799573	0.82649
30.65	0.561284	0.634145	0.724222	0.795258	0.778517	0.734943	0.766137	0.767578	0.58156	0.628592	0.726032	0.773749	0.848472	0.73701	0.796902	0.819277
30.75	0.561859	0.635081	0.722538	0.793431	0.776286	0.737012	0.763989	0.76333	0.579825	0.625645	0.729203	0.76523	0.848347	0.73623	0.796858	0.818578
30.85	0.559198	0.636846	0.719389	0.787835	0.780948	0.733912	0.763654	0.765702	0.58285	0.622987	0.726453	0.770665	0.842557	0.732368	0.796014	0.823945
30.95	0.556049	0.633802	0.717562	0.788429	0.775176	0.729872	0.766026	0.763309	0.581922	0.623063	0.725709	0.769588	0.847584	0.738669	0.79301	0.821171
31.05	0.561257	0.634202	0.717746	0.788445	0.774513	0.734665	0.760146	0.768698	0.578231	0.625367	0.727436	0.768838	0.845954	0.736659	0.794254	0.814034
31.15	0.558872	0.635691	0.714281	0.785093	0.7758	0.728771	0.759563	0.763449	0.57741	0.623168	0.72729	0.768449	0.844729	0.737142	0.793189	0.823131
31.25	0.559681	0.632707	0.718193	0.785636	0.776944	0.729295	0.760869	0.761687	0.577982	0.620062	0.721642	0.766358	0.845525	0.731945	0.789127	0.816088
31.35	0.556454	0.633897	0.715017	0.78607	0.774192	0.727471	0.756738	0.763597	0.579825	0.621106	0.72505	0.768044	0.844297	0.728766	0.787562	0.814906
31.45	0.563235	0.630753	0.714451	0.780754	0.773946	0.726966	0.758071	0.762167	0.580203	0.620545	0.719651	0.765932	0.844732	0.730933	0.785919	0.812075
31.55	0.558357	0.629933	0.71516	0.789362	0.771749	0.732722	0.755257	0.760802	0.576744	0.621551	0.720932	0.76346	0.838058	0.731122	0.782705	0.812982
31.65	0.561036	0.634852	0.71587	0.785069	0.768954	0.726089	0.750407	0.755586	0.576107	0.615696	0.717643	0.763376	0.84111	0.731321	0.781655	0.814452
31.75	0.561775	0.630529	0.714386	0.783272	0.769866	0.726518	0.749315	0.753821	0.579815	0.617895	0.71821	0.762621	0.84243	0.723296	0.778574	0.811576
31.85	0.560208	0.63268	0.713342	0.787643	0.767599	0.725188	0.751263	0.751241	0.5751	0.617382	0.720978	0.762305	0.835284	0.727263	0.781642	0.810329
31.95	0.56044	0.633867	0.715479	0.787195	0.769108	0.724438	0.750386	0.753975	0.572985	0.617479	0.718407	0.759936	0.837257	0.72488	0.78705	0.811395
32.05	0.559622	0.629304	0.716272	0.785789	0.766304	0.723075	0.750405	0.759248	0.572853	0.61433	0.714575	0.758106	0.835217	0.721683	0.779502	0.809663
32.15	0.560453	0.633519	0.713849	0.781512	0.765176	0.725552	0.747806	0.753063	0.571452	0.615704	0.712508	0.760052	0.830403	0.720884	0.776742	0.806495
32.25	0.562032	0.631695	0.7121	0.782322	0.762707	0.725363	0.749147	0.749226	0.571927	0.613467	0.711998	0.756841	0.832686	0.722408	0.77805	0.800086
32.35	0.562545	0.629045	0.712637	0.78345	0.769413	0.721413	0.751025	0.752029	0.574348	0.61256	0.708296	0.757005	0.830886	0.719734	0.771982	0.799649
32.45	0.558354	0.625445	0.710039	0.785476	0.765187	0.720158	0.752682	0.751357	0.569005	0.613877	0.712241	0.754655	0.827065	0.722295	0.773638	0.800434
32.55	0.56017	0.628373	0.714901	0.782789	0.761957	0.720679	0.748683	0.748397	0.573473	0.609943	0.711437	0.754717	0.827542	0.716421	0.775592	0.801381
32.65	0.560621	0.630297	0.714194	0.783423	0.761045	0.715875	0.748988	0.748481	0.573171	0.610615	0.708627	0.751508	0.827702	0.719	0.770808	0.802755
32.75	0.560596	0.630494	0.709553	0.779659	0.761315	0.71526	0.745334	0.74422	0.566838	0.612973	0.712983	0.755545	0.823786	0.716491	0.769475	0.797603
32.85	0.558864	0.624733	0.712589	0.781561	0.763991	0.719885	0.742687	0.744846	0.568673	0.608693	0.706358	0.75405	0.824561	0.716135	0.770514	0.800277
32.95	0.560205	0.63183	0.713271	0.775805	0.760996	0.715557	0.746694	0.749266	0.568608	0.610868	0.707937	0.753311	0.822003	0.716145	0.770578	0.797393
33.05	0.559703	0.628978	0.709766	0.778315	0.761625	0.71468	0.738896	0.743305	0.569884	0.605077	0.703916	0.751544	0.816992	0.712772	0.767783	0.796675
33.15	0.558988	0.625971	0.706083	0.777076	0.757245	0.716383	0.739651	0.740153	0.570483	0.609846	0.701388	0.748114	0.818926	0.710309	0.766212	0.793788
33.25	0.558419	0.626587	0.709256	0.779888	0.757871	0.712654	0.737123	0.745488	0.565737	0.607387	0.705546	0.749771	0.816196	0.71264	0.7656	0.790771
33.35	0.559476	0.626454	0.703538	0.77427	0.755516	0.710697	0.735874	0.740604	0.567782	0.609157	0.701941	0.745866	0.817771	0.705638	0.761404	0.789745
33.45	0.558575	0.623815	0.707054	0.773455	0.75864	0.713347	0.743489	0.740275	0.563573	0.606429	0.699863	0.747213	0.814272	0.70628	0.761978	0.78954
33.55	0.558837	0.624827	0.706682	0.777246	0.755645	0.710006	0.737738	0.73736	0.563392	0.604638	0.704599	0.748516	0.813675	0.707556	0.760435	0.78875
33.65	0.56116	0.626098	0.704739	0.772734	0.75687	0.705708	0.738934	0.739938	0.56184	0.603979	0.700791	0.749255	0.820931	0.706461	0.759963	0.785528
33.75	0.556592	0.62785	0.706992	0.771188	0.752779	0.709804	0.732779	0.735067	0.567534	0.601354	0.698862	0.745429	0.814328	0.703142	0.76322	0.78944
33.85	0.561214	0.62639	0.707273	0.775414	0.756117	0.708663	0.734093	0.731629	0.563632	0.601097	0.698104	0.742676	0.808791	0.703514	0.758945	0.782835
33.95	0.55728	0.623686	0.709979	0.77081	0.754304	0.707254	0.73477	0.737139	0.563216	0.601971	0.697197	0.744873	0.8102	0.703363	0.76081	0.783269
34.05	0.557906	0.620704	0.706361	0.770918	0.754558	0.704663	0.734916	0.734095	0.565076	0.597562	0.694992	0.742037	0.813967	0.701652	0.756832	0.78236
34.15	0.56242	0.62143	0.702559	0.770373	0.751419	0.703406	0.732509	0.73528	0.563538	0.602028	0.696501	0.739511	0.812547	0.697092	0.756568	0.781844
34.25	0.558991	0.62262	0.702367	0.769375	0.753176	0.702777	0.735196	0.728612	0.5619	0.59705	0.693443	0.739638	0.810496	0.6989	0.759088	0.783129
34.35	0.557482	0.625232	0.703568	0.769019	0.750774	0.703608	0.735064	0.730512	0.560699	0.596747	0.695543	0.735817	0.811943	0.69755	0.762704	0.778393
34.45	0.557971	0.621209	0.703684	0.768044	0.750726	0.703905	0.727098	0.729821	0.562515	0.596013	0.692574	0.738542	0.808683	0.696204	0.760489	0.775692
34.55	0.558678	0.622992	0.699221	0.767162	0.747283	0.702308	0.728342	0.728054	0.55973	0.601472	0.693476	0.737973	0.804689	0.695894	0.755535	0.776801
34.65	0.559549	0.617801	0.700713	0.764777	0.747798	0.703533	0.728029	0.72981	0.56146	0.597997	0.691444	0.733974	0.806918	0.696331	0.753646	0.775093
34.75	0.558494	0.619811	0.699933	0.765473	0.744579	0.698303	0.722247	0.725773	0.558931	0.59753	0.689647	0.739476	0.808116	0.695467	0.752569	0.77981
34.85	0.55568	0.624509	0.701935	0.760238	0.747782	0.702545	0.726381	0.729206	0.561981	0.595671	0.689717	0.733334	0.806424	0.696139	0.757904	0.775989
34.95	0.558964	0.619768	0.697146	0.768622	0.748807	0.698087	0.722762	0.722093	0.55942	0.598294	0.695276	0.729862	0.807113	0.69313	0.751141	0.775025
35.05	0.558008	0.621252	0.701317	0.761018	0.742968	0.698592	0.723534	0.722465	0.559476	0.59542	0.685982	0.729964	0.806875	0.691886	0.748416	0.771666
35.15	0.56021	0.618767	0.69789	0.767208	0.744749	0.699723	0.719883	0.726513	0.557938	0.589159	0.686916	0.730852	0.804312	0.691754	0.746484	0.770673
35.25	0.557188	0.619465	0.700527	0.764515	0.740561	0.696938	0.72114	0.720522	0.556446	0.593312	0.686311	0.729438	0.804201	0.687399	0.748716	0.768066
35.35	0.557933	0.618073	0.700127	0.75864	0.743732	0.692394	0.720158	0.722646	0.554851	0.589942	0.687107	0.728782	0.802339	0.687307	0.745939	0.769504
35.45	0.557504	0.614835	0.695867	0.760823	0.738407	0.696026	0.721119	0.721459	0.555669	0.590371	0.68442	0.727862	0.806538	0.685129	0.745691	0.767413
35.55	0.559565	0.614884	0.700106	0.758595	0.739028	0.693503	0.716987	0.720255	0.559725	0.589748	0.684169	0.729813	0.802525	0.689746	0.743467	0.762666
35.65	0.557725	0.6147	0.697788	0.759364	0.74092	0.69449	0.716329	0.717338	0.554773	0.591191	0.685723	0.730045	0.801529	0.685232	0.746835	0.761865
35.75	0.558581	0.61687	0.700009	0.756382	0.737493	0.691201	0.720101	0.716269	0.556681	0.58482	0.68636	0.726154	0.802317	0.683211	0.742096	0.758748

## Sheet: primary data n=2
	mitochondria								mitoplasts
time (min)	0.1	0.16	0.25	0.4	0.63	1	1.58	2.5	0.1	0.16	0.25	0.4	0.63	1	1.58	2.5	PCP (µM)
0
0.37	0.00605	0.008745	0.007012	0.007169	0.008023	0.007986	0.007854	0.008045	0.044225	0.036667	0.032566	0.03498	0.037216	0.038711	0.035797	0.037225
0.47	0.006673	0.009386	0.008674	0.008378	0.008779	0.009124	0.009972	0.010012	0.048301	0.040546	0.036787	0.042479	0.045443	0.045588	0.042729	0.044481
0.57	0.006975	0.010167	0.009642	0.010244	0.010438	0.010867	0.012535	0.012085	0.054724	0.045914	0.042649	0.04906	0.052193	0.053053	0.0521	0.056186
0.67	0.008529	0.011298	0.011107	0.011656	0.012544	0.014582	0.01523	0.015674	0.061369	0.050339	0.048801	0.056229	0.059753	0.063488	0.062954	0.069402
0.77	0.009032	0.012797	0.013192	0.014197	0.016392	0.017317	0.020154	0.021283	0.066704	0.056655	0.0551	0.066618	0.07075	0.074826	0.074317	0.082754
0.87	0.009932	0.014308	0.014915	0.016229	0.018896	0.021964	0.025304	0.026701	0.073389	0.062979	0.062575	0.076803	0.080814	0.085483	0.087447	0.100444
0.97	0.011351	0.015991	0.01712	0.018612	0.022174	0.026639	0.03091	0.03358	0.080142	0.06819	0.071221	0.087302	0.091006	0.099966	0.101795	0.11688
1.07	0.011915	0.017185	0.01967	0.022072	0.026232	0.03284	0.038594	0.042045	0.088335	0.076177	0.07935	0.098172	0.103849	0.110959	0.119026	0.134496
1.17	0.013315	0.019513	0.022088	0.025813	0.032177	0.038767	0.047058	0.052078	0.095205	0.08239	0.086423	0.109479	0.115582	0.128089	0.134234	0.15264
1.27	0.014632	0.021304	0.025979	0.030413	0.037564	0.046136	0.054885	0.063401	0.102523	0.089547	0.094632	0.123426	0.130192	0.141206	0.14923	0.174472
1.37	0.016741	0.023238	0.028668	0.034141	0.043626	0.05371	0.06597	0.074561	0.110814	0.09782	0.102396	0.135239	0.140041	0.15602	0.166457	0.194241
1.47	0.017629	0.024971	0.03157	0.038415	0.049356	0.061955	0.074693	0.087977	0.118841	0.104545	0.111237	0.145628	0.155261	0.168897	0.180497	0.216248
1.57	0.019741	0.027388	0.036038	0.043287	0.055887	0.07	0.086877	0.101477	0.12532	0.113593	0.121536	0.160037	0.16779	0.185236	0.200053	0.237818
1.67	0.021567	0.030823	0.038683	0.048653	0.063636	0.079057	0.097182	0.115865	0.134283	0.119976	0.130411	0.171074	0.18095	0.198696	0.213019	0.256439
1.77	0.023074	0.03231	0.043235	0.054811	0.0698	0.09136	0.109236	0.1296	0.144475	0.128955	0.140799	0.185458	0.191468	0.212298	0.232838	0.278061
1.87	0.025606	0.035369	0.046861	0.059812	0.077163	0.099559	0.122427	0.144139	0.152606	0.135875	0.148906	0.196125	0.20775	0.227056	0.246748	0.295326
1.97	0.026106	0.037302	0.051212	0.065335	0.085289	0.109029	0.134996	0.15968	0.16149	0.143328	0.156624	0.208061	0.218687	0.241108	0.265375	0.312431
2.07	0.029171	0.04046	0.056399	0.071715	0.093546	0.120518	0.148453	0.176821	0.169387	0.149991	0.169356	0.221613	0.232511	0.258795	0.280263	0.334229
2.17	0.030604	0.043864	0.060546	0.077274	0.102304	0.132227	0.160895	0.19482	0.176368	0.15919	0.174472	0.234956	0.242613	0.272995	0.293226	0.350861
2.27	0.033608	0.046716	0.06647	0.083623	0.111265	0.143688	0.17659	0.209063	0.185727	0.165628	0.185212	0.247216	0.255955	0.28224	0.311034	0.37043
2.37	0.035726	0.049886	0.070469	0.089991	0.122057	0.154768	0.189677	0.227003	0.19462	0.172578	0.19301	0.259711	0.269239	0.297747	0.322431	0.387692
2.47	0.037795	0.053145	0.074129	0.098446	0.130253	0.164746	0.202841	0.245064	0.201185	0.182575	0.20408	0.269437	0.281799	0.311299	0.340646	0.402043
2.57	0.040213	0.056685	0.079874	0.104456	0.137534	0.177272	0.216192	0.261721	0.21087	0.190306	0.212834	0.285443	0.293877	0.324219	0.351928	0.419116
2.67	0.041588	0.059609	0.086355	0.111363	0.147429	0.190247	0.234712	0.278518	0.21811	0.198357	0.221956	0.294762	0.30524	0.337707	0.366865	0.437957
2.77	0.045057	0.062479	0.091403	0.118958	0.158203	0.201345	0.245977	0.294586	0.228511	0.203621	0.230133	0.30351	0.317744	0.351487	0.377596	0.45562
2.87	0.047835	0.066106	0.09499	0.127555	0.170099	0.214999	0.261755	0.314716	0.234682	0.212113	0.237901	0.318949	0.326961	0.361222	0.389767	0.46636
2.97	0.049396	0.07075	0.101965	0.133574	0.177497	0.226063	0.275471	0.332234	0.24429	0.221456	0.247296	0.329958	0.338102	0.371124	0.405055	0.482419
3.07	0.051175	0.074123	0.106615	0.142144	0.189541	0.237044	0.289184	0.349844	0.252344	0.229076	0.256146	0.340488	0.350078	0.38376	0.416017	0.498352
3.17	0.055708	0.077361	0.11317	0.149634	0.19952	0.25174	0.304682	0.363492	0.259751	0.23552	0.263272	0.351897	0.35973	0.396452	0.429764	0.511846
3.27	0.058289	0.082476	0.118092	0.15848	0.207386	0.262782	0.318715	0.3829	0.269474	0.244768	0.270867	0.363331	0.368876	0.408339	0.442259	0.527902
3.37	0.062094	0.084641	0.124758	0.166393	0.217947	0.275459	0.332169	0.395003	0.279335	0.25129	0.280112	0.369647	0.382653	0.419832	0.45491	0.540819
3.47	0.062939	0.088338	0.131588	0.173507	0.22754	0.28771	0.346618	0.416335	0.284404	0.257744	0.288345	0.382496	0.392049	0.431515	0.460652	0.549653
3.57	0.0663	0.091647	0.137293	0.183121	0.239251	0.300513	0.362147	0.429218	0.295348	0.263155	0.294617	0.39471	0.400692	0.439002	0.477781	0.56764
3.67	0.068844	0.096097	0.142119	0.188992	0.247444	0.311999	0.373492	0.447855	0.302508	0.27306	0.307457	0.403782	0.412545	0.446835	0.483005	0.577933
3.77	0.072655	0.098943	0.14881	0.19503	0.260957	0.323452	0.385243	0.464106	0.308527	0.280645	0.309939	0.416834	0.423248	0.458632	0.496619	0.590625
3.87	0.075618	0.105326	0.154256	0.206374	0.271555	0.3366	0.399471	0.478586	0.318132	0.290158	0.317417	0.42302	0.430143	0.471096	0.501038	0.59829
3.97	0.079128	0.107108	0.162196	0.21421	0.283303	0.345228	0.418783	0.494029	0.322588	0.29182	0.325394	0.434466	0.440276	0.479832	0.512327	0.61155
4.07	0.080537	0.11317	0.167361	0.222659	0.293026	0.359989	0.429832	0.508013	0.33005	0.302505	0.332992	0.445324	0.449795	0.492323	0.523162	0.622293
4.17	0.083469	0.115871	0.174102	0.229572	0.301903	0.371247	0.440341	0.521315	0.339677	0.306378	0.342012	0.454109	0.454473	0.497778	0.531861	0.63443
4.27	0.088483	0.119051	0.179908	0.239736	0.312622	0.387275	0.452178	0.533973	0.347371	0.315326	0.349582	0.459126	0.466585	0.506215	0.541876	0.642019
4.37	0.090487	0.12428	0.183679	0.246433	0.323112	0.395357	0.466606	0.551343	0.357648	0.319489	0.355336	0.47154	0.473073	0.513973	0.550665	0.655583
4.47	0.093623	0.129146	0.193167	0.25717	0.330501	0.406924	0.482274	0.563088	0.364182	0.325098	0.363421	0.479437	0.480816	0.521321	0.558602	0.660375
4.57	0.096689	0.131888	0.197472	0.263652	0.342554	0.419671	0.491599	0.577658	0.369943	0.33084	0.365848	0.488108	0.490896	0.53109	0.565568	0.668593
4.67	0.09968	0.138055	0.20626	0.27224	0.355416	0.427692	0.501253	0.586906	0.37924	0.33956	0.373871	0.493258	0.495404	0.540739	0.577276	0.682793
4.77	0.102859	0.143334	0.211567	0.278832	0.360044	0.437874	0.515099	0.596187	0.380902	0.343008	0.381037	0.499163	0.502909	0.545996	0.584535	0.689965
4.87	0.106056	0.146112	0.217626	0.286794	0.369452	0.446483	0.524328	0.612876	0.389992	0.350883	0.390217	0.511614	0.50825	0.553542	0.589367	0.696234
4.97	0.107284	0.150198	0.225813	0.295348	0.381469	0.45702	0.537436	0.623196	0.396165	0.35985	0.399335	0.520899	0.522046	0.559271	0.596804	0.699845
5.07	0.11326	0.154438	0.229187	0.303735	0.390421	0.468022	0.545339	0.636326	0.404044	0.361608	0.405293	0.531556	0.528241	0.568821	0.599385	0.710224
5.17	0.115834	0.157574	0.236217	0.310673	0.402558	0.478312	0.557834	0.65073	0.413554	0.3682	0.408546	0.534781	0.533612	0.574522	0.607211	0.719521
5.27	0.119109	0.164305	0.244293	0.319616	0.409011	0.490982	0.565796	0.660557	0.414805	0.370602	0.414994	0.543964	0.539699	0.578728	0.614368	0.727304
5.37	0.122443	0.165187	0.248999	0.328015	0.419585	0.497655	0.578685	0.669068	0.425555	0.380692	0.419092	0.549185	0.545851	0.584849	0.622364	0.728649
5.47	0.126488	0.170201	0.256763	0.335847	0.429998	0.509598	0.586046	0.679499	0.43084	0.384469	0.424923	0.559675	0.554337	0.592555	0.624785	0.74213
5.57	0.130777	0.176072	0.260806	0.340269	0.436505	0.519218	0.598953	0.685118	0.434929	0.391787	0.433248	0.566502	0.556567	0.598266	0.631812	0.74028
5.67	0.134052	0.178206	0.265363	0.350346	0.445943	0.530393	0.606622	0.697452	0.441185	0.397112	0.437047	0.567822	0.568747	0.602789	0.642416	0.756089
5.77	0.136263	0.181385	0.274352	0.357944	0.454439	0.541473	0.614242	0.708019	0.44565	0.398839	0.44483	0.57488	0.570048	0.609983	0.643335	0.755787
5.87	0.139365	0.1891	0.281493	0.365989	0.463011	0.549237	0.626181	0.717714	0.455105	0.406785	0.443076	0.586212	0.57879	0.618025	0.65603	0.76176
5.97	0.141955	0.193405	0.285221	0.371981	0.470732	0.55801	0.632472	0.723354	0.459548	0.41281	0.453248	0.587828	0.581124	0.617985	0.65756	0.770215
6.07	0.145002	0.196226	0.293291	0.378799	0.478256	0.562731	0.644162	0.733027	0.465894	0.416452	0.461327	0.592432	0.591911	0.624812	0.658041	0.775895
6.17	0.148844	0.202992	0.297417	0.385767	0.488062	0.574744	0.653258	0.744591	0.472252	0.421074	0.462098	0.601692	0.593751	0.630557	0.66464	0.779546
6.27	0.151937	0.205178	0.304916	0.397864	0.496591	0.581371	0.658192	0.755907	0.476323	0.429144	0.470122	0.609203	0.597211	0.632925	0.667393	0.787727
6.37	0.156939	0.209507	0.312699	0.40368	0.504158	0.591846	0.667116	0.765815	0.481472	0.429489	0.470251	0.616098	0.600409	0.64501	0.67488	0.791072
6.47	0.158104	0.215344	0.319141	0.414149	0.512024	0.595703	0.673067	0.765877	0.486681	0.434334	0.477316	0.61859	0.604541	0.644708	0.675944	0.797434
6.57	0.160716	0.219362	0.322298	0.417161	0.518142	0.603702	0.680671	0.775167	0.491787	0.441093	0.486745	0.622099	0.611679	0.646974	0.686385	0.797998
6.67	0.164197	0.221231	0.33228	0.424355	0.526514	0.610878	0.690021	0.781267	0.498805	0.445771	0.488944	0.62809	0.615321	0.65172	0.687612	0.797835
6.77	0.169023	0.227299	0.3361	0.432484	0.532546	0.620261	0.698892	0.793666	0.502031	0.45167	0.492909	0.632574	0.620027	0.657828	0.68875	0.810743
6.87	0.174111	0.230506	0.343732	0.437797	0.542422	0.625892	0.701889	0.798402	0.507393	0.45751	0.494991	0.641047	0.627588	0.660569	0.697048	0.816419
6.97	0.175844	0.234481	0.347648	0.448666	0.549912	0.636107	0.709358	0.803885	0.512216	0.451266	0.503282	0.647097	0.631297	0.665602	0.696749	0.815679
7.07	0.179125	0.241413	0.353279	0.451774	0.557347	0.641084	0.71604	0.809155	0.518728	0.465805	0.504115	0.644125	0.632154	0.669607	0.704285	0.818307
7.17	0.183722	0.244978	0.359773	0.460926	0.565105	0.649623	0.722007	0.816441	0.523893	0.465715	0.513027	0.649697	0.637316	0.670717	0.707776	0.825035
7.27	0.188234	0.250093	0.368694	0.466714	0.570393	0.6532	0.730628	0.823663	0.528543	0.470791	0.509681	0.654393	0.644572	0.672003	0.71048	0.825279
7.37	0.18931	0.252326	0.374898	0.468654	0.579154	0.662984	0.736626	0.828559	0.529305	0.475894	0.516369	0.664572	0.644402	0.678473	0.70949	0.82826
7.47	0.193426	0.259248	0.380282	0.481028	0.584242	0.666903	0.739117	0.833052	0.538645	0.477325	0.522755	0.662891	0.647621	0.684211	0.710357	0.836503
7.57	0.196815	0.260627	0.38566	0.484719	0.592126	0.676848	0.749349	0.841483	0.540884	0.484988	0.526058	0.669052	0.657862	0.686573	0.718578	0.834104
7.67	0.19816	0.266822	0.389406	0.489641	0.597668	0.684846	0.752266	0.845686	0.544001	0.486458	0.530362	0.674338	0.657418	0.689401	0.716302	0.838868
7.77	0.203103	0.269159	0.392755	0.495903	0.605521	0.685531	0.762725	0.852926	0.550347	0.492669	0.532339	0.677612	0.658914	0.696114	0.723832	0.840083
7.87	0.206683	0.2738	0.40133	0.500276	0.609576	0.692383	0.767776	0.855757	0.551972	0.498549	0.533699	0.677785	0.66266	0.695361	0.726626	0.839426
7.97	0.210972	0.276788	0.403405	0.510335	0.618879	0.693718	0.769876	0.861979	0.555749	0.50002	0.534297	0.68389	0.665528	0.696027	0.725466	0.841455
8.07	0.213232	0.282314	0.410985	0.515626	0.621642	0.703536	0.772667	0.866185	0.561374	0.502123	0.54245	0.689342	0.669324	0.700375	0.732148	0.844165
8.17	0.217814	0.286581	0.418497	0.519169	0.624994	0.708547	0.779151	0.873133	0.563711	0.505672	0.544457	0.693058	0.671621	0.705978	0.732367	0.850943
8.27	0.222242	0.291265	0.421244	0.529188	0.635081	0.719083	0.786558	0.87432	0.571096	0.507165	0.548882	0.697995	0.674479	0.703965	0.730893	0.854708
8.37	0.223078	0.294774	0.427581	0.532089	0.637951	0.723548	0.790237	0.881881	0.576092	0.509184	0.551944	0.70348	0.677002	0.709077	0.73608	0.857009
8.47	0.226202	0.297287	0.43335	0.539049	0.644011	0.721815	0.794708	0.883419	0.573748	0.514827	0.552117	0.70258	0.6811	0.714893	0.743872	0.854079
8.57	0.232816	0.303698	0.438567	0.545034	0.652025	0.729367	0.799549	0.889756	0.577563	0.51513	0.556129	0.704372	0.68488	0.711377	0.742195	0.858911
8.67	0.234142	0.307442	0.439261	0.549477	0.655719	0.73291	0.802587	0.89209	0.581901	0.521143	0.56204	0.70772	0.684692	0.708331	0.744245	0.862047
8.77	0.237155	0.313066	0.44521	0.555376	0.659879	0.742084	0.807563	0.891372	0.586542	0.527735	0.562262	0.713083	0.691054	0.71773	0.741211	0.864745
8.87	0.239868	0.316603	0.45236	0.556301	0.667918	0.742497	0.812543	0.898128	0.592274	0.525	0.566332	0.712077	0.690492	0.719083	0.742337	0.858788
8.97	0.242838	0.320374	0.456551	0.569573	0.666354	0.746456	0.818951	0.909368	0.592614	0.531577	0.565463	0.71793	0.694119	0.721257	0.744683	0.859663
9.07	0.24515	0.322434	0.46277	0.56924	0.679472	0.751939	0.822571	0.902667	0.597322	0.53648	0.57365	0.720489	0.696903	0.719287	0.744147	0.867721
9.17	0.248696	0.328354	0.464704	0.576002	0.675688	0.759746	0.824643	0.916056	0.604162	0.539807	0.57508	0.724079	0.699814	0.721994	0.751393	0.865399
9.27	0.25334	0.329387	0.475342	0.585247	0.681263	0.75995	0.825473	0.919543	0.601497	0.539789	0.575685	0.726061	0.694529	0.724942	0.748316	0.867113
9.37	0.256646	0.333797	0.476946	0.586653	0.689086	0.767791	0.832041	0.916124	0.605777	0.541244	0.578719	0.727622	0.7041	0.722725	0.752386	0.86654
9.47	0.25717	0.339588	0.482623	0.587834	0.690347	0.767193	0.835849	0.921116	0.610492	0.544812	0.581775	0.73205	0.701519	0.725843	0.75225	0.870249
9.57	0.260753	0.34359	0.48669	0.594874	0.697856	0.771063	0.842226	0.921662	0.614825	0.54751	0.585198	0.732716	0.706407	0.727372	0.75628	0.867564
9.67	0.265838	0.34537	0.495648	0.60146	0.70221	0.780265	0.843188	0.924591	0.615469	0.552136	0.592737	0.734609	0.708756	0.734803	0.757637	0.868748
9.77	0.26742	0.348829	0.495392	0.605743	0.706897	0.78262	0.843148	0.929241	0.619798	0.553887	0.588947	0.738485	0.702663	0.731581	0.755331	0.876154
9.87	0.271327	0.352453	0.501537	0.607624	0.714976	0.783576	0.847875	0.932137	0.621266	0.555851	0.590859	0.73814	0.712697	0.733869	0.761088	0.867786
9.97	0.27446	0.359209	0.507334	0.613798	0.715019	0.784862	0.852494	0.938865	0.625244	0.558879	0.593224	0.739845	0.711196	0.735093	0.759164	0.873478
10.07	0.275857	0.361814	0.50734	0.613455	0.716493	0.786472	0.859266	0.940447	0.626561	0.562259	0.594051	0.744871	0.713952	0.735892	0.755368	0.871631
10.17	0.278767	0.364451	0.515093	0.619777	0.724245	0.796376	0.86033	0.940515	0.626077	0.560452	0.601294	0.74361	0.711223	0.738279	0.760527	0.874394
10.27	0.281888	0.368216	0.515487	0.621362	0.729472	0.80176	0.866111	0.947394	0.635173	0.562805	0.596622	0.746607	0.71094	0.741041	0.759497	0.876133
10.37	0.287136	0.374404	0.520304	0.62854	0.729527	0.801288	0.863404	0.947151	0.636925	0.563233	0.598395	0.744603	0.714652	0.739342	0.763598	0.877332
10.47	0.29055	0.373307	0.526656	0.634131	0.735118	0.802426	0.867132	0.949873	0.638303	0.568318	0.600437	0.748494	0.718686	0.73818	0.759635	0.874307
10.57	0.291654	0.379927	0.527822	0.638596	0.739034	0.806379	0.865359	0.949133	0.639098	0.569925	0.607985	0.753508	0.718982	0.738667	0.765269	0.873274
10.67	0.295564	0.384155	0.532931	0.637319	0.737989	0.811273	0.875633	0.954878	0.642225	0.573298	0.60645	0.757391	0.719096	0.741458	0.763552	0.879408
10.77	0.299363	0.386144	0.535802	0.644267	0.742543	0.81242	0.874921	0.957854	0.646928	0.573569	0.609364	0.759935	0.715747	0.745642	0.766046	0.871255
10.87	0.300288	0.388096	0.542549	0.653067	0.744998	0.814961	0.875273	0.956768	0.646172	0.574368	0.609373	0.755889	0.72225	0.746752	0.762815	0.877761
10.97	0.305539	0.392308	0.544892	0.651895	0.747807	0.817477	0.879497	0.96251	0.649832	0.58089	0.612056	0.75699	0.720391	0.742774	0.762858	0.876108
11.07	0.308512	0.399206	0.551164	0.654442	0.753203	0.81937	0.881726	0.961687	0.65085	0.58258	0.61686	0.762488	0.722777	0.739635	0.763595	0.876867
11.17	0.308521	0.402835	0.554316	0.661498	0.752932	0.823715	0.888048	0.965763	0.657353	0.580193	0.614621	0.762824	0.717168	0.745303	0.768272	0.880549
11.27	0.31504	0.406939	0.553021	0.660523	0.762497	0.823811	0.884051	0.966599	0.657813	0.584445	0.616107	0.762275	0.719287	0.748094	0.765497	0.880234
11.37	0.314444	0.407149	0.562385	0.667763	0.758528	0.832494	0.886666	0.965103	0.659783	0.588657	0.618143	0.765833	0.729225	0.748411	0.773231	0.878742
11.47	0.322141	0.408823	0.563835	0.669746	0.7623	0.832078	0.885639	0.971064	0.66003	0.588435	0.618324	0.762099	0.723585	0.75184	0.765426	0.879771
11.57	0.32248	0.414198	0.570023	0.667655	0.764313	0.833111	0.888794	0.970111	0.661427	0.592259	0.620316	0.769299	0.725738	0.745029	0.77127	0.880792
11.67	0.325314	0.418743	0.569527	0.674449	0.768106	0.839065	0.890037	0.97704	0.66492	0.593557	0.621935	0.771328	0.729848	0.750853	0.770693	0.882174
11.77	0.326699	0.421839	0.578068	0.675756	0.772161	0.836839	0.894785	0.970145	0.666946	0.587199	0.622836	0.768538	0.726447	0.746499	0.766873	0.879426
11.87	0.330895	0.422332	0.582114	0.684831	0.775325	0.84251	0.892534	0.975507	0.669839	0.593005	0.617702	0.772145	0.728251	0.753962	0.764745	0.881048
11.97	0.333637	0.425922	0.581775	0.683949	0.780049	0.840647	0.899432	0.973432	0.666721	0.592407	0.62093	0.772334	0.731291	0.748439	0.770453	0.877376
12.07	0.334173	0.43257	0.585506	0.688451	0.779876	0.839996	0.902189	0.980515	0.671297	0.592564	0.62397	0.770588	0.735229	0.752315	0.766721	0.878251
12.17	0.340618	0.433042	0.589536	0.690455	0.781674	0.848519	0.904388	0.97699	0.671433	0.595333	0.621747	0.76805	0.729965	0.750881	0.769703	0.873358
12.27	0.341814	0.433658	0.592299	0.692096	0.781686	0.846148	0.909383	0.979229	0.672759	0.596187	0.624316	0.771153	0.731763	0.751883	0.766737	0.874782
12.37	0.346239	0.437448	0.591349	0.692361	0.785815	0.848763	0.905692	0.979439	0.672065	0.601232	0.62801	0.774896	0.727717	0.754005	0.768673	0.875331
12.47	0.348108	0.441269	0.599493	0.69933	0.793052	0.848593	0.904505	0.979732	0.680249	0.601463	0.632635	0.777252	0.731041	0.753666	0.770921	0.878328
12.57	0.35018	0.442693	0.601945	0.700875	0.790036	0.852812	0.90888	0.980392	0.679191	0.603844	0.633884	0.77447	0.731966	0.755164	0.772247	0.880835
12.67	0.348746	0.448358	0.604245	0.698969	0.791671	0.85345	0.908671	0.984635	0.67978	0.604026	0.63385	0.782941	0.732287	0.747813	0.771988	0.875695
12.77	0.354337	0.451324	0.607751	0.706089	0.794911	0.854295	0.906182	0.982263	0.686296	0.600335	0.632971	0.779518	0.729157	0.755611	0.771714	0.871899
12.87	0.356961	0.456613	0.608694	0.707276	0.794514	0.862399	0.914338	0.984286	0.685497	0.604202	0.630662	0.782383	0.735642	0.751775	0.769833	0.878816
12.97	0.358897	0.458114	0.610165	0.709493	0.79736	0.859155	0.915556	0.980907	0.681282	0.608892	0.63332	0.784763	0.7311	0.755855	0.774014	0.873182
13.07	0.364537	0.459308	0.61262	0.716669	0.803644	0.8616	0.917505	0.984628	0.690761	0.610002	0.629798	0.782294	0.735522	0.754581	0.76592	0.872038
13.17	0.368836	0.463107	0.615435	0.715139	0.80283	0.864554	0.917641	0.990228	0.686493	0.606163	0.635978	0.781439	0.730804	0.753971	0.771125	0.871643
13.27	0.363359	0.462767	0.622617	0.720307	0.800579	0.864943	0.915704	0.985575	0.690471	0.611753	0.637258	0.777363	0.731347	0.753888	0.766697	0.871433
13.37	0.370855	0.471213	0.623505	0.717347	0.810413	0.864332	0.916031	0.988452	0.692787	0.60752	0.631254	0.782802	0.733758	0.753767	0.768815	0.874828
13.47	0.374676	0.471812	0.625555	0.718257	0.807616	0.864816	0.919793	0.990953	0.691723	0.612083	0.636502	0.78727	0.730049	0.755284	0.771754	0.875988
13.57	0.372607	0.472148	0.628198	0.721078	0.812491	0.871313	0.918011	0.989235	0.697523	0.611217	0.6364	0.782408	0.733012	0.750622	0.768852	0.874079
13.67	0.373606	0.473396	0.629401	0.727767	0.809407	0.869158	0.920404	0.990555	0.696789	0.614596	0.639373	0.78398	0.732306	0.754868	0.76942	0.875593
13.77	0.380464	0.47792	0.630733	0.724122	0.821285	0.869112	0.921514	0.994046	0.701843	0.612759	0.638543	0.783715	0.737252	0.75518	0.766314	0.876201
13.87	0.380177	0.47998	0.636764	0.73213	0.815047	0.871489	0.919667	0.989164	0.697181	0.612157	0.641411	0.78259	0.732784	0.753329	0.773101	0.871847
13.97	0.383402	0.485	0.637643	0.736684	0.819645	0.875513	0.927721	0.989294	0.702228	0.612481	0.637769	0.784757	0.732895	0.754618	0.769663	0.871403
14.07	0.386606	0.483847	0.639786	0.73394	0.818103	0.874782	0.926253	0.99119	0.698423	0.618624	0.640366	0.785177	0.734862	0.751593	0.767921	0.871122
14.17	0.391935	0.491997	0.636533	0.732861	0.82135	0.877428	0.926084	0.992812	0.704316	0.613906	0.638969	0.78431	0.732565	0.751942	0.769176	0.873089
14.27	0.388956	0.489625	0.640739	0.738525	0.820302	0.877715	0.927672	0.992615	0.700073	0.617439	0.643489	0.790968	0.733992	0.753191	0.771942	0.871113
14.37	0.396989	0.493005	0.647356	0.737628	0.82254	0.874027	0.9239	0.991366	0.70332	0.620424	0.642487	0.785399	0.730126	0.746817	0.768198	0.871779
14.47	0.394109	0.493486	0.646814	0.738285	0.823114	0.879405	0.927558	0.991125	0.704412	0.618491	0.640733	0.789771	0.735072	0.756003	0.76398	0.868476
14.57	0.400205	0.497923	0.650477	0.741988	0.826487	0.876358	0.930006	0.99226	0.704455	0.620508	0.640727	0.786096	0.737027	0.752556	0.761704	0.865442
14.67	0.403772	0.500674	0.651072	0.740863	0.82937	0.878125	0.929035	0.996266	0.705146	0.61818	0.640696	0.786944	0.736401	0.751208	0.765984	0.870539
14.77	0.401333	0.501753	0.651124	0.746327	0.827375	0.882436	0.923543	0.988181	0.710104	0.616283	0.640754	0.787011	0.734032	0.757653	0.765337	0.866907
14.87	0.403532	0.500538	0.657779	0.75011	0.829155	0.87493	0.932584	1	0.705593	0.622182	0.646703	0.79139	0.737819	0.753265	0.759697	0.868461
14.97	0.405259	0.508111	0.658963	0.747773	0.830095	0.885553	0.932353	0.99148	0.708972	0.621904	0.639906	0.791199	0.731621	0.755972	0.761279	0.86843
15.07	0.411478	0.506483	0.658118	0.751251	0.833333	0.883598	0.933484	0.997327	0.703952	0.624223	0.643002	0.786342	0.735987	0.751982	0.765658	0.868563
15.17	0.410677	0.510094	0.661994	0.754594	0.837067	0.885612	0.927743	0.993296	0.711128	0.625287	0.647711	0.787403	0.733249	0.750853	0.76657	0.869053
15.27	0.407476	0.51517	0.661183	0.755358	0.831461	0.885054	0.932198	0.994277	0.711886	0.62534	0.647026	0.788402	0.734597	0.746462	0.764125	0.870385
15.37	0.415422	0.51504	0.668581	0.755318	0.840391	0.884866	0.929883	0.989257	0.711516	0.622321	0.643702	0.789404	0.735442	0.753314	0.763533	0.866996
15.47	0.416591	0.518127	0.664624	0.75818	0.834625	0.885356	0.930842	0.992775	0.714615	0.623048	0.650283	0.78761	0.732247	0.751581	0.761109	0.864008
15.57	0.41603	0.519539	0.669543	0.759083	0.836938	0.885384	0.935633	0.997166	0.71316	0.626977	0.647748	0.794101	0.733154	0.749407	0.765167	0.867305
15.67	0.421287	0.520834	0.672352	0.759003	0.838489	0.887354	0.934375	0.997626	0.716731	0.625133	0.647905	0.794375	0.7369	0.751997	0.763394	0.867249
15.77	0.419764	0.525759	0.671578	0.761566	0.839799	0.886284	0.931011	0.990632	0.714591	0.628568	0.649527	0.790961	0.737181	0.749743	0.763182	0.861236
15.87	0.424593	0.523267	0.677622	0.757967	0.841168	0.888612	0.934449	0.993028	0.716342	0.625435	0.645978	0.785911	0.735972	0.753141	0.762441	0.858014
15.97	0.425108	0.525401	0.677285	0.759225	0.838883	0.886595	0.932467	0.991776	0.71987	0.626693	0.64657	0.786604	0.734492	0.749978	0.760903	0.86033
16.07	0.428194	0.529838	0.681248	0.764603	0.839093	0.886688	0.937382	0.988652	0.715516	0.630868	0.647517	0.788488	0.731023	0.747711	0.758029	0.864529
16.17	0.42705	0.528404	0.678738	0.763145	0.84131	0.890493	0.934496	0.989143	0.721239	0.62867	0.646518	0.789222	0.737098	0.753678	0.760104	0.857474
16.27	0.432077	0.533215	0.677507	0.76369	0.841458	0.88646	0.939701	0.993296	0.714911	0.628047	0.646317	0.790798	0.730539	0.747597	0.757677	0.866151
16.37	0.435206	0.536628	0.682457	0.769842	0.841396	0.889386	0.935396	0.991187	0.714991	0.629351	0.650298	0.788667	0.733083	0.751948	0.759487	0.859115
16.47	0.432021	0.534334	0.681855	0.769836	0.838803	0.888535	0.937289	0.986223	0.718658	0.62455	0.648195	0.786669	0.734353	0.746034	0.759654	0.859596
16.57	0.437572	0.539582	0.683302	0.764782	0.847465	0.889343	0.934619	0.987499	0.718969	0.62595	0.649789	0.789919	0.729046	0.746669	0.755479	0.854724
16.67	0.441651	0.540387	0.687948	0.765389	0.845038	0.889935	0.933148	0.986667	0.717918	0.631827	0.640736	0.790419	0.731115	0.746835	0.758103	0.851871
16.77	0.442209	0.542006	0.684433	0.766327	0.84435	0.892901	0.931847	0.987126	0.717338	0.62694	0.646413	0.789925	0.729484	0.741516	0.752287	0.852926
16.87	0.445253	0.544168	0.687128	0.769632	0.843761	0.894455	0.93802	0.99169	0.718926	0.628244	0.651198	0.788778	0.733493	0.745682	0.753712	0.852843
16.97	0.441922	0.542524	0.693342	0.770964	0.845522	0.890095	0.936392	0.989272	0.717893	0.632799	0.644356	0.785241	0.731917	0.743598	0.753003	0.850144
17.07	0.442308	0.547202	0.687026	0.769691	0.847388	0.894496	0.93461	0.99157	0.71698	0.629983	0.643542	0.787246	0.730943	0.742836	0.75411	0.853848
17.17	0.445832	0.545648	0.69743	0.773018	0.846703	0.895649	0.933592	0.986599	0.721637	0.629777	0.648806	0.790508	0.728957	0.740412	0.751686	0.854859
17.27	0.450014	0.549832	0.695858	0.774122	0.845886	0.897524	0.933053	0.985396	0.72188	0.631972	0.648547	0.790665	0.72723	0.736135	0.759879	0.848393
17.37	0.453588	0.550356	0.691942	0.77238	0.850487	0.894832	0.935837	0.98967	0.719648	0.632278	0.648056	0.784091	0.726931	0.744967	0.750829	0.849617
17.47	0.453486	0.552111	0.695605	0.774646	0.848427	0.89362	0.931446	0.986941	0.720785	0.631501	0.645889	0.786114	0.729043	0.748205	0.754344	0.848325
17.57	0.460297	0.557285	0.697942	0.780613	0.849386	0.892158	0.937077	0.983127	0.723915	0.633456	0.646434	0.788263	0.725963	0.737542	0.748837	0.84329
17.67	0.456585	0.557556	0.694742	0.775066	0.85238	0.886984	0.932001	0.98514	0.723746	0.630745	0.648269	0.787206	0.727909	0.739999	0.749324	0.846284
17.77	0.457923	0.559265	0.696706	0.773619	0.852084	0.891708	0.929645	0.986454	0.727409	0.633116	0.648445	0.787141	0.731405	0.736644	0.748636	0.845877
17.87	0.459416	0.559573	0.701313	0.776873	0.850561	0.89506	0.936315	0.985782	0.72348	0.636521	0.646983	0.785624	0.727511	0.739157	0.747024	0.842947
17.97	0.460609	0.560896	0.697554	0.7732	0.849062	0.894718	0.93317	0.985248	0.722833	0.634926	0.647985	0.785661	0.724729	0.735004	0.749481	0.841301
18.07	0.463409	0.563844	0.701929	0.781547	0.849885	0.890928	0.933339	0.985202	0.723567	0.63274	0.646545	0.786472	0.721569	0.735287	0.751085	0.846928
18.17	0.464081	0.567217	0.704196	0.773237	0.853962	0.895433	0.931976	0.986651	0.727338	0.634519	0.649515	0.782482	0.726536	0.734979	0.745802	0.842824
18.27	0.467417	0.565645	0.707696	0.779833	0.847807	0.891656	0.932272	0.986596	0.723903	0.633687	0.642053	0.784104	0.722793	0.734871	0.747104	0.846786
18.37	0.467439	0.565386	0.70361	0.783277	0.849673	0.892467	0.934489	0.982905	0.721957	0.632222	0.64908	0.780104	0.725004	0.73419	0.743761	0.84102
18.47	0.472481	0.569511	0.707782	0.784622	0.849287	0.887619	0.933641	0.981964	0.722056	0.634529	0.648654	0.784545	0.723178	0.737107	0.743129	0.842152
18.57	0.467504	0.569178	0.701788	0.778038	0.851366	0.897434	0.931853	0.977959	0.721714	0.628713	0.646493	0.783043	0.719555	0.734899	0.750536	0.836268
18.67	0.472604	0.570705	0.708235	0.78333	0.847443	0.889586	0.934255	0.980589	0.729456	0.631476	0.642864	0.783348	0.721482	0.735164	0.746885	0.837554
18.77	0.47562	0.57582	0.70241	0.782189	0.850718	0.893237	0.92975	0.97988	0.723073	0.629755	0.643998	0.781313	0.722608	0.731624	0.742879	0.83921
18.87	0.471913	0.571698	0.706678	0.786755	0.846666	0.890351	0.934949	0.984687	0.72596	0.632222	0.641177	0.77674	0.717168	0.735241	0.742411	0.837218
18.97	0.473403	0.577313	0.709657	0.783533	0.855581	0.897126	0.931757	0.980863	0.72698	0.632133	0.641627	0.784319	0.71863	0.735084	0.74081	0.840604
19.07	0.478046	0.577014	0.709635	0.783672	0.84806	0.88757	0.932652	0.984295	0.722321	0.627785	0.641966	0.780524	0.720489	0.732975	0.737566	0.833209
19.17	0.477467	0.581744	0.713628	0.785337	0.851301	0.890478	0.930629	0.984687	0.723733	0.63283	0.64414	0.781498	0.717662	0.729672	0.743	0.836546
19.27	0.48019	0.575688	0.71303	0.783912	0.84864	0.890027	0.931461	0.97831	0.724131	0.631966	0.643671	0.781794	0.71801	0.731507	0.738467	0.830764
19.37	0.480498	0.581396	0.709447	0.7832	0.853037	0.887752	0.926848	0.979981	0.726552	0.62978	0.647168	0.778242	0.717054	0.730557	0.737042	0.828501
19.47	0.483726	0.579931	0.710098	0.783351	0.855442	0.887274	0.929864	0.976525	0.723733	0.63097	0.641297	0.778362	0.716549	0.733672	0.736854	0.830521
19.57	0.486138	0.580384	0.711837	0.782984	0.855963	0.891437	0.927743	0.978168	0.730058	0.627344	0.640329	0.773289	0.715358	0.72962	0.734606	0.825963
19.67	0.487596	0.580433	0.715479	0.788735	0.851387	0.889926	0.927761	0.977693	0.725328	0.626909	0.639065	0.775944	0.717976	0.727579	0.735682	0.829324
19.77	0.486092	0.584553	0.712096	0.780098	0.854021	0.892861	0.92107	0.971363	0.727545	0.634365	0.642167	0.774927	0.716888	0.728692	0.734822	0.832503
19.87	0.487239	0.587291	0.715657	0.78621	0.854708	0.890542	0.926182	0.972609	0.726959	0.632965	0.641673	0.779262	0.715476	0.725389	0.733511	0.826009
19.97	0.489052	0.588913	0.712895	0.789784	0.852867	0.89135	0.930345	0.979516	0.728337	0.628843	0.643005	0.77583	0.71521	0.725482	0.735913	0.826262
20.07	0.488219	0.586749	0.715543	0.788226	0.852016	0.888957	0.926481	0.973296	0.719974	0.629721	0.640076	0.777764	0.714359	0.726462	0.73398	0.828081
20.17	0.491562	0.589373	0.714853	0.784896	0.84979	0.89032	0.930502	0.969096	0.728168	0.627754	0.640045	0.776077	0.717363	0.723684	0.731035	0.823712
20.27	0.494393	0.590717	0.713804	0.789577	0.848146	0.88662	0.924036	0.971909	0.72748	0.628722	0.641639	0.772916	0.710813	0.71908	0.734628	0.823718
20.37	0.495274	0.586718	0.716317	0.79197	0.853336	0.890832	0.924443	0.967311	0.724489	0.631997	0.644239	0.774245	0.708695	0.722753	0.729981	0.823308
20.47	0.498228	0.591907	0.713724	0.786839	0.848572	0.881841	0.922769	0.96988	0.725328	0.629419	0.638772	0.77324	0.714291	0.720693	0.728168	0.816632
20.57	0.496452	0.591167	0.719944	0.789512	0.847286	0.888621	0.924459	0.966004	0.726872	0.62908	0.639253	0.769309	0.710705	0.717896	0.729752	0.816771
20.67	0.494682	0.592537	0.71846	0.788128	0.849549	0.888927	0.924533	0.966741	0.727067	0.630508	0.638935	0.770625	0.708806	0.720869	0.725386	0.823771
20.77	0.494932	0.591858	0.720533	0.789497	0.850659	0.888624	0.921693	0.968837	0.725291	0.628787	0.640757	0.773656	0.712827	0.720921	0.725796	0.818029
20.87	0.50072	0.594411	0.725725	0.787428	0.850992	0.884674	0.926599	0.961813	0.723928	0.627402	0.637652	0.772216	0.705281	0.717273	0.722673	0.816743
20.97	0.500748	0.601763	0.719222	0.791902	0.847977	0.88761	0.923614	0.966855	0.72489	0.627338	0.636169	0.770434	0.708568	0.714439	0.727844	0.818794
21.07	0.499533	0.599882	0.717945	0.786916	0.849805	0.887625	0.920894	0.963367	0.726172	0.627964	0.641633	0.770061	0.706826	0.718223	0.723339	0.812602
21.17	0.505941	0.600101	0.72304	0.783212	0.847314	0.886537	0.921779	0.962402	0.727825	0.627643	0.637538	0.773092	0.70769	0.714554	0.721785	0.812303
21.27	0.505839	0.595703	0.721115	0.789019	0.852303	0.88925	0.921415	0.960746	0.723977	0.623918	0.636897	0.766913	0.706647	0.717884	0.72213	0.81045
21.37	0.505311	0.601911	0.723505	0.792022	0.852177	0.886691	0.91888	0.961906	0.727862	0.626733	0.634945	0.767329	0.704822	0.716151	0.716225	0.8088
21.47	0.505083	0.598753	0.725158	0.786728	0.84699	0.889445	0.920262	0.959799	0.725602	0.626551	0.63958	0.763385	0.701282	0.713721	0.718938	0.810459
21.57	0.504352	0.602086	0.723844	0.79036	0.848652	0.883015	0.916195	0.959192	0.7192	0.628161	0.638482	0.766194	0.70657	0.713955	0.719944	0.807452
21.67	0.510618	0.599327	0.723851	0.789339	0.846928	0.885078	0.91913	0.958856	0.720505	0.62303	0.635577	0.764359	0.704273	0.714643	0.71307	0.810447
21.77	0.512663	0.603745	0.721637	0.792966	0.849586	0.884964	0.918998	0.952834	0.727545	0.627285	0.63414	0.762232	0.703579	0.709882	0.719419	0.802438
21.87	0.51339	0.605361	0.724779	0.793	0.85123	0.884397	0.916025	0.954804	0.72242	0.626369	0.635796	0.764551	0.700403	0.706709	0.720915	0.802997
21.97	0.514007	0.603326	0.723826	0.788226	0.846244	0.880197	0.913944	0.956873	0.721211	0.625182	0.637159	0.765994	0.701939	0.711849	0.716351	0.802503
22.07	0.51031	0.604171	0.725679	0.79365	0.849152	0.888014	0.915818	0.951717	0.72159	0.625142	0.632756	0.763246	0.698066	0.710483	0.717887	0.799965
22.17	0.514525	0.606249	0.725028	0.790462	0.852676	0.883456	0.913577	0.957203	0.720486	0.625007	0.63393	0.768488	0.697005	0.708056	0.716003	0.795824
22.27	0.513202	0.60616	0.726373	0.79003	0.844798	0.881662	0.913404	0.952908	0.725972	0.623659	0.629672	0.765214	0.697686	0.707332	0.718204	0.798313
22.37	0.51336	0.607643	0.727033	0.793327	0.846441	0.880169	0.914391	0.956337	0.721874	0.627847	0.631007	0.762842	0.695694	0.707353	0.718248	0.799235
22.47	0.517014	0.609108	0.724538	0.789265	0.847486	0.87963	0.913379	0.948073	0.717683	0.62533	0.630403	0.763169	0.696515	0.710267	0.71262	0.795636
22.57	0.513218	0.610064	0.725152	0.789586	0.853684	0.882396	0.913598	0.953469	0.719648	0.626641	0.63167	0.761664	0.695488	0.706286	0.710388	0.791372
22.67	0.517652	0.610483	0.727656	0.784868	0.844202	0.880182	0.912904	0.946475	0.718809	0.62681	0.632022	0.762645	0.696484	0.705978	0.709114	0.796873
22.77	0.516748	0.611864	0.724782	0.793182	0.844128	0.875994	0.911612	0.953256	0.721344	0.626258	0.632419	0.761482	0.692845	0.706508	0.711069	0.79493
22.87	0.51644	0.6113	0.725886	0.785605	0.847844	0.877465	0.914237	0.946565	0.722225	0.625688	0.629789	0.757724	0.697474	0.707159	0.709108	0.79542
22.97	0.518919	0.61315	0.724008	0.790388	0.84646	0.876617	0.907002	0.948214	0.717665	0.625167	0.631775	0.758078	0.693678	0.700344	0.709157	0.792664
23.07	0.520566	0.611053	0.723851	0.790332	0.844736	0.881104	0.906284	0.948591	0.721078	0.627073	0.628602	0.758935	0.694082	0.701479	0.708402	0.791674
23.17	0.522385	0.61089	0.730773	0.790107	0.84716	0.876515	0.906913	0.948002	0.716117	0.620542	0.629983	0.755417	0.69135	0.698454	0.708386	0.786558
23.27	0.521463	0.613381	0.728889	0.792226	0.848782	0.877783	0.907459	0.944881	0.714698	0.619438	0.624788	0.755574	0.690492	0.697899	0.706339	0.789583
23.37	0.523181	0.612182	0.726613	0.796287	0.842436	0.877576	0.902963	0.94465	0.715778	0.622978	0.626912	0.757378	0.689601	0.703046	0.704726	0.791883
23.47	0.525793	0.613789	0.729398	0.790212	0.842331	0.87711	0.906876	0.943287	0.719327	0.621787	0.625377	0.759262	0.690443	0.69743	0.70599	0.787122
23.57	0.524599	0.61427	0.727014	0.787748	0.84502	0.874474	0.902189	0.94275	0.712592	0.61937	0.628769	0.75394	0.689049	0.698923	0.70275	0.786826
23.67	0.523073	0.617661	0.728559	0.790918	0.841652	0.877786	0.901131	0.941591	0.715315	0.621886	0.625777	0.746518	0.686262	0.69777	0.706401	0.785624
23.77	0.526036	0.61504	0.727983	0.788448	0.844831	0.876503	0.905775	0.946802	0.717125	0.618281	0.628568	0.750012	0.689678	0.693342	0.704612	0.781967
23.87	0.529548	0.618115	0.727828	0.789191	0.840453	0.875297	0.900928	0.936605	0.716897	0.624643	0.623301	0.751862	0.691754	0.696179	0.7004	0.787301
23.97	0.527313	0.61361	0.730927	0.789799	0.846438	0.875282	0.903056	0.942257	0.712022	0.618975	0.624257	0.748161	0.688735	0.691612	0.698023	0.785867
24.07	0.526089	0.616175	0.728365	0.791507	0.838421	0.872211	0.901199	0.938748	0.714877	0.620819	0.62397	0.749611	0.686314	0.691892	0.699666	0.782716
24.17	0.531417	0.615478	0.726262	0.786648	0.846873	0.87826	0.9014	0.941446	0.714396	0.618398	0.621849	0.749173	0.682404	0.692771	0.697896	0.781859
24.27	0.528596	0.618241	0.730169	0.788106	0.842161	0.874801	0.899466	0.935445	0.714461	0.616228	0.62204	0.74785	0.683844	0.690594	0.701606	0.781186
24.37	0.531876	0.619419	0.733345	0.784289	0.839562	0.872799	0.894708	0.92831	0.714483	0.618577	0.627338	0.748609	0.684927	0.694924	0.697375	0.783351
24.47	0.534778	0.620878	0.725981	0.786339	0.840832	0.867005	0.898816	0.933601	0.714125	0.615155	0.62056	0.752463	0.689413	0.688877	0.696922	0.778408
24.57	0.532663	0.619071	0.72485	0.784023	0.839272	0.871884	0.897372	0.931326	0.713394	0.614183	0.62533	0.744384	0.681029	0.68781	0.694066	0.776114
24.67	0.532505	0.616373	0.727989	0.786802	0.840666	0.870484	0.89946	0.932374	0.713212	0.616992	0.618691	0.74657	0.680492	0.689854	0.697696	0.774282
24.77	0.537115	0.621874	0.725738	0.792676	0.840918	0.866879	0.895695	0.927755	0.709006	0.615444	0.62397	0.742842	0.679321	0.688096	0.689281	0.772972
24.87	0.535873	0.619302	0.730363	0.788445	0.834961	0.868168	0.891393	0.926515	0.711951	0.615531	0.617985	0.743268	0.678911	0.688722	0.691874	0.773111
24.97	0.5336	0.6213	0.729453	0.787622	0.838714	0.866432	0.893197	0.934126	0.708747	0.617177	0.617655	0.746598	0.683132	0.684976	0.693391	0.772818
25.07	0.536693	0.625207	0.731069	0.784554	0.834711	0.867804	0.89555	0.923913	0.710792	0.615719	0.617211	0.743148	0.679524	0.685549	0.692651	0.770668
25.17	0.536844	0.625025	0.730274	0.788442	0.833496	0.867983	0.891455	0.923093	0.710166	0.615855	0.61402	0.74414	0.676067	0.681433	0.694042	0.772275
25.27	0.541087	0.624106	0.732105	0.786956	0.834085	0.865171	0.888988	0.918825	0.712022	0.611867	0.613459	0.741707	0.677094	0.680739	0.688056	0.763246
25.37	0.537825	0.623042	0.727674	0.784619	0.839201	0.864983	0.889993	0.926352	0.710884	0.615284	0.62134	0.735303	0.676459	0.68357	0.68513	0.772472
25.47	0.537418	0.623292	0.729981	0.784794	0.838751	0.866941	0.89205	0.928452	0.712114	0.61175	0.61641	0.741535	0.677141	0.683126	0.685599	0.770672
25.57	0.541099	0.623785	0.729312	0.787116	0.838957	0.866811	0.887033	0.927925	0.70743	0.612376	0.618303	0.738914	0.675124	0.680918	0.68682	0.759746
25.67	0.539786	0.624288	0.728063	0.784427	0.834835	0.858319	0.886706	0.914625	0.709567	0.607341	0.613977	0.734794	0.672006	0.677329	0.682851	0.767832
25.77	0.54006	0.622031	0.72912	0.782691	0.831625	0.859133	0.887456	0.926158	0.705358	0.609835	0.616789	0.7413	0.670391	0.679142	0.685861	0.76407
25.87	0.539175	0.627736	0.725614	0.783647	0.835331	0.860792	0.894616	0.920472	0.708636	0.616598	0.61155	0.734736	0.669663	0.676555	0.6832	0.760675
25.97	0.539965	0.623983	0.72661	0.782216	0.831538	0.865328	0.888868	0.922343	0.710045	0.61122	0.612133	0.735991	0.671686	0.678756	0.682654	0.762075
26.07	0.542284	0.627819	0.722802	0.780073	0.837008	0.859506	0.891298	0.917194	0.704529	0.60723	0.609175	0.734868	0.668207	0.675747	0.678673	0.761005
26.17	0.538827	0.625	0.724282	0.779595	0.830613	0.858809	0.888051	0.920145	0.702854	0.609524	0.611433	0.73444	0.669194	0.676256	0.682275	0.757588
26.27	0.542999	0.628303	0.727054	0.782778	0.831554	0.856336	0.880345	0.919519	0.703881	0.607045	0.608768	0.734242	0.667344	0.674547	0.677785	0.757169
26.37	0.546511	0.625821	0.728115	0.783422	0.833216	0.860869	0.882661	0.912217	0.703533	0.608735	0.606027	0.73122	0.671208	0.672302	0.681072	0.759873
26.47	0.546915	0.627939	0.726274	0.781079	0.835544	0.85925	0.87835	0.910157	0.700474	0.605731	0.607887	0.731088	0.67061	0.672876	0.682968	0.758442
26.57	0.54479	0.624458	0.729811	0.783283	0.828618	0.857594	0.874869	0.908039	0.704726	0.603637	0.613483	0.735241	0.667045	0.673335	0.681128	0.753388
26.67	0.546351	0.623582	0.72406	0.782704	0.83127	0.855972	0.880505	0.911495	0.702706	0.609031	0.604809	0.728661	0.667245	0.673169	0.674664	0.752216
26.77	0.548805	0.623385	0.729256	0.781048	0.829707	0.856265	0.876848	0.908486	0.705355	0.600862	0.608195	0.727227	0.661041	0.672009	0.676817	0.752682
26.87	0.547078	0.624584	0.725361	0.779731	0.827674	0.85625	0.875498	0.910647	0.70418	0.607341	0.606397	0.728097	0.663301	0.671754	0.676021	0.749799
26.97	0.547291	0.627588	0.724945	0.781402	0.83156	0.854449	0.878914	0.907699	0.698161	0.605928	0.60616	0.722907	0.661192	0.672466	0.674128	0.751606
27.07	0.545703	0.630218	0.723869	0.783795	0.826706	0.848686	0.872328	0.90613	0.697067	0.605315	0.608617	0.722164	0.661612	0.66739	0.671152	0.745676
27.17	0.55047	0.62661	0.727612	0.778979	0.825544	0.854218	0.878655	0.907064	0.697659	0.601534	0.601581	0.724122	0.658087	0.665216	0.675087	0.745898
27.27	0.550119	0.631695	0.72341	0.782821	0.829941	0.852377	0.874656	0.908443	0.697619	0.599431	0.603422	0.726974	0.6618	0.66707	0.669734	0.750422
27.37	0.551044	0.626894	0.725198	0.778424	0.825704	0.849778	0.87621	0.900009	0.699015	0.602746	0.602392	0.723727	0.664461	0.665044	0.669327	0.746814
27.47	0.552391	0.627554	0.725673	0.780949	0.822735	0.851347	0.873191	0.902547	0.698223	0.597643	0.605987	0.722975	0.656675	0.66213	0.667742	0.744634
27.57	0.549169	0.62999	0.721091	0.783299	0.825047	0.854008	0.874317	0.902352	0.702679	0.598963	0.604174	0.717819	0.657951	0.664994	0.670619	0.746287
27.67	0.552197	0.630464	0.719907	0.774285	0.826481	0.850616	0.871168	0.905451	0.691411	0.597279	0.603822	0.723888	0.660918	0.664957	0.673018	0.74662
27.77	0.552706	0.629031	0.72468	0.780903	0.8216	0.853274	0.870703	0.900672	0.693419	0.60134	0.601467	0.724822	0.658507	0.665713	0.668232	0.746166
27.87	0.552863	0.630199	0.724162	0.779352	0.827237	0.847055	0.873407	0.898396	0.697165	0.601648	0.604146	0.71793	0.657958	0.661957	0.669768	0.741859
27.97	0.554013	0.62607	0.723117	0.776472	0.826006	0.852136	0.869463	0.899121	0.693878	0.600128	0.603727	0.721063	0.65538	0.655858	0.668275	0.744816
28.07	0.550162	0.630162	0.724834	0.780986	0.82139	0.847304	0.865578	0.898631	0.695855	0.59529	0.599471	0.720493	0.657507	0.6604	0.663449	0.746718
28.17	0.549792	0.628355	0.726475	0.774079	0.821973	0.846139	0.868421	0.897157	0.691895	0.59612	0.602592	0.71493	0.655651	0.656502	0.663631	0.742953
28.27	0.55364	0.624661	0.725007	0.776111	0.822343	0.846534	0.865411	0.896858	0.69604	0.593517	0.598642	0.715402	0.656268	0.656376	0.66538	0.740708
28.37	0.553116	0.627165	0.726635	0.773394	0.825507	0.845254	0.862436	0.897517	0.697905	0.596998	0.596564	0.718642	0.65311	0.655722	0.664569	0.737687
28.47	0.555589	0.628661	0.725269	0.777637	0.821933	0.842602	0.866349	0.893755	0.693187	0.603267	0.599089	0.71805	0.652161	0.658167	0.663983	0.736718
28.57	0.551352	0.628861	0.724526	0.777918	0.820764	0.843567	0.862994	0.889805	0.690446	0.593887	0.59759	0.715352	0.653369	0.655956	0.659799	0.734418
28.67	0.555426	0.629761	0.722679	0.775149	0.822028	0.844548	0.858874	0.892393	0.692518	0.594732	0.598833	0.713342	0.649465	0.656912	0.660095	0.734399
28.77	0.556903	0.628892	0.726373	0.771627	0.820144	0.84366	0.861338	0.894949	0.691581	0.595759	0.598833	0.714415	0.651266	0.65332	0.654208	0.733681
28.87	0.555503	0.632268	0.72489	0.776654	0.817246	0.84016	0.862476	0.891091	0.691479	0.591667	0.597476	0.716305	0.652497	0.650428	0.658466	0.731448
28.97	0.557214	0.630912	0.720779	0.772907	0.818075	0.838572	0.862029	0.88819	0.688904	0.591815	0.597285	0.713915	0.651189	0.652934	0.656471	0.731908
29.07	0.559095	0.630591	0.721769	0.774884	0.817903	0.835516	0.856426	0.883139	0.688177	0.593647	0.59307	0.711455	0.650122	0.650502	0.659194	0.732263
29.17	0.557097	0.630175	0.72348	0.771745	0.815559	0.843496	0.855642	0.881545	0.687233	0.590585	0.594846	0.711202	0.64781	0.6506	0.656154	0.727828
29.27	0.558179	0.632626	0.723231	0.768636	0.814924	0.840222	0.857123	0.88469	0.689934	0.586906	0.593933	0.713354	0.646342	0.650335	0.653132	0.729315
29.37	0.558469	0.628947	0.721791	0.773767	0.815972	0.841936	0.860249	0.884711	0.688883	0.589586	0.594766	0.708855	0.644951	0.64867	0.65209	0.731553
29.47	0.558016	0.62822	0.721285	0.770329	0.815019	0.834363	0.850656	0.880641	0.687316	0.591981	0.587433	0.708454	0.647982	0.647655	0.653446	0.725155
29.57	0.557119	0.633375	0.720215	0.767603	0.81649	0.836617	0.852547	0.885578	0.688149	0.591229	0.591874	0.707683	0.643958	0.650215	0.648778	0.726774
29.67	0.557017	0.628291	0.724239	0.773915	0.815146	0.834909	0.855365	0.882022	0.688929	0.592611	0.587538	0.712466	0.644957	0.649959	0.651467	0.724184
29.77	0.556271	0.627668	0.721831	0.771785	0.813203	0.834412	0.851554	0.876537	0.688254	0.590788	0.59117	0.707119	0.643733	0.646074	0.653511	0.721353
29.87	0.558179	0.636974	0.721896	0.769611	0.810382	0.83152	0.852325	0.878452	0.686971	0.587748	0.591349	0.708846	0.642595	0.643964	0.646314	0.722565
29.97	0.559499	0.632774	0.723558	0.772226	0.811597	0.833336	0.852309	0.87452	0.683039	0.58694	0.589832	0.701621	0.639543	0.640452	0.652093	0.720761
30.07	0.559299	0.630212	0.718938	0.769753	0.808387	0.83407	0.851992	0.874082	0.684415	0.587526	0.588605	0.70661	0.639348	0.638679	0.647514	0.719
30.17	0.559502	0.635386	0.71706	0.766629	0.808353	0.833391	0.849	0.877727	0.684066	0.587245	0.584146	0.703807	0.64081	0.63879	0.645608	0.718763
30.27	0.560696	0.633693	0.717727	0.766746	0.811409	0.833496	0.848226	0.875982	0.679166	0.58488	0.588734	0.700289	0.636373	0.642688	0.646012	0.717841
30.37	0.560446	0.632114	0.719598	0.765849	0.804501	0.833589	0.847721	0.873644	0.682817	0.586869	0.585885	0.703012	0.642901	0.640048	0.641488	0.717119
30.47	0.560797	0.632481	0.718957	0.764914	0.806897	0.828411	0.847986	0.869657	0.68102	0.587131	0.586641	0.701575	0.639225	0.637766	0.642691	0.717896
30.57	0.560051	0.627051	0.717261	0.766694	0.805044	0.832056	0.845901	0.876046	0.68315	0.58266	0.58805	0.698772	0.635796	0.641183	0.641186	0.7183
30.67	0.555592	0.630415	0.718115	0.76587	0.806555	0.828211	0.840209	0.870919	0.68213	0.582188	0.586409	0.699151	0.641997	0.635969	0.640909	0.714683
30.77	0.563054	0.63176	0.719324	0.764255	0.803592	0.828766	0.843354	0.87168	0.677461	0.584325	0.580557	0.699829	0.641784	0.636579	0.640677	0.716049
30.87	0.559626	0.6292	0.715873	0.766869	0.806271	0.824702	0.845498	0.868566	0.677033	0.584106	0.5855	0.695383	0.636403	0.636777	0.636172	0.714945
30.97	0.56043	0.631297	0.717017	0.762898	0.805331	0.823586	0.845658	0.868038	0.678991	0.585827	0.583671	0.696126	0.636089	0.635753	0.634945	0.715759
31.07	0.559955	0.628839	0.713351	0.7697	0.805322	0.822164	0.842849	0.86605	0.67562	0.583835	0.581365	0.696576	0.635651	0.637372	0.638436	0.707267
31.17	0.567331	0.632731	0.716512	0.765984	0.800595	0.82435	0.843154	0.864341	0.676743	0.583647	0.584902	0.694726	0.635975	0.637353	0.63891	0.710008
31.27	0.567091	0.631322	0.712333	0.767243	0.803993	0.825423	0.83555	0.864862	0.676197	0.580742	0.580825	0.69344	0.635528	0.632367	0.633665	0.711353
31.37	0.563162	0.632913	0.712244	0.766469	0.808889	0.821236	0.835837	0.863641	0.675719	0.578593	0.582536	0.694372	0.633881	0.634297	0.634914	0.706179
31.47	0.565679	0.632503	0.717292	0.761615	0.801828	0.82234	0.840851	0.864381	0.674692	0.581411	0.575774	0.69011	0.630276	0.629086	0.631898	0.702965
31.57	0.564501	0.628815	0.714964	0.762768	0.796789	0.819037	0.837576	0.865195	0.67579	0.581281	0.579043	0.693727	0.629367	0.629657	0.634859	0.706533
31.67	0.565164	0.633665	0.713003	0.759494	0.803123	0.823832	0.834517	0.864536	0.672401	0.57833	0.581951	0.697051	0.627973	0.631057	0.631353	0.709148
31.77	0.564377	0.627662	0.713878	0.762139	0.802929	0.816796	0.835766	0.859287	0.672487	0.57764	0.575444	0.691199	0.628799	0.629447	0.631078	0.70415
31.87	0.5664	0.629771	0.715096	0.764588	0.805877	0.817477	0.831671	0.85658	0.670357	0.581911	0.576231	0.687067	0.62818	0.628809	0.631701	0.703434
31.97	0.563668	0.629777	0.712343	0.760844	0.8009	0.817243	0.838001	0.856716	0.674239	0.576659	0.581904	0.688047	0.628269	0.626965	0.630668	0.702241
32.07	0.565898	0.632376	0.709611	0.759753	0.796241	0.816355	0.830218	0.851779	0.672028	0.575009	0.571044	0.687067	0.627224	0.62464	0.627803	0.702176
32.17	0.566224	0.631525	0.718297	0.760607	0.798636	0.81448	0.834853	0.856947	0.671282	0.575669	0.574112	0.692367	0.622876	0.627692	0.632022	0.700172
32.27	0.564488	0.631208	0.712784	0.756518	0.796771	0.814104	0.830881	0.850243	0.669484	0.573995	0.575824	0.688695	0.620788	0.624461	0.628513	0.698917
32.37	0.563156	0.627143	0.711337	0.75769	0.79444	0.814307	0.831529	0.849343	0.666145	0.575987	0.572836	0.687979	0.624393	0.626379	0.629126	0.699564
32.47	0.564106	0.629536	0.714365	0.756413	0.796006	0.809845	0.825417	0.850696	0.663702	0.572786	0.571001	0.68842	0.62192	0.624624	0.624572	0.699099
32.57	0.564948	0.632194	0.709435	0.757656	0.79509	0.811322	0.824992	0.855072	0.670233	0.573542	0.573835	0.684375	0.620261	0.621877	0.628035	0.695475
32.67	0.566884	0.628365	0.711575	0.752771	0.797832	0.809568	0.824452	0.847594	0.666351	0.572231	0.573801	0.684976	0.619061	0.619558	0.625916	0.696456
32.77	0.567957	0.629539	0.710789	0.756074	0.794011	0.808852	0.824717	0.843666	0.665583	0.569518	0.571642	0.680865	0.61571	0.624297	0.625047	0.692506
32.87	0.565888	0.625633	0.709604	0.755022	0.796592	0.811304	0.825803	0.844656	0.666573	0.571281	0.570939	0.682774	0.617868	0.620153	0.621016	0.695617
32.97	0.565213	0.629018	0.710215	0.754424	0.795097	0.807563	0.821261	0.845658	0.667162	0.571618	0.567738	0.681464	0.616693	0.617806	0.622885	0.691001
33.07	0.565117	0.628266	0.70748	0.753715	0.790425	0.805019	0.82148	0.847699	0.665007	0.572111	0.572129	0.678248	0.616817	0.617461	0.622028	0.687239
33.17	0.566434	0.631834	0.709728	0.751979	0.79036	0.81008	0.820043	0.843718	0.66299	0.571069	0.56833	0.680622	0.617809	0.616487	0.61986	0.693308
33.27	0.567347	0.631553	0.70456	0.750856	0.786314	0.803299	0.818048	0.837261	0.667844	0.569071	0.568182	0.681945	0.618158	0.617507	0.621645	0.687104
33.37	0.565731	0.633385	0.710474	0.750782	0.791248	0.806697	0.819472	0.840891	0.663277	0.570692	0.569061	0.681239	0.617714	0.614905	0.620298	0.689296
33.47	0.56747	0.629644	0.708559	0.748772	0.787647	0.803135	0.82127	0.841446	0.665075	0.567902	0.565919	0.674849	0.611272	0.613101	0.61324	0.68748
33.57	0.56994	0.632019	0.707708	0.746428	0.789617	0.804717	0.815411	0.842158	0.661291	0.566508	0.565364	0.67814	0.616798	0.611368	0.61784	0.686018
33.67	0.566517	0.62789	0.705229	0.748979	0.786379	0.803607	0.811224	0.83662	0.657951	0.566705	0.564494	0.681692	0.615207	0.613209	0.617612	0.680246
33.77	0.570992	0.627742	0.711085	0.753644	0.785494	0.798775	0.814208	0.839395	0.660946	0.566517	0.567495	0.678004	0.617128	0.613255	0.617513	0.684504
33.87	0.565694	0.628984	0.706502	0.747335	0.786552	0.801257	0.817295	0.837264	0.655287	0.566718	0.565848	0.67525	0.611917	0.610196	0.613961	0.683792
33.97	0.566042	0.627544	0.703496	0.747477	0.783289	0.800385	0.810468	0.835094	0.656616	0.563363	0.568882	0.674344	0.609487	0.612126	0.611716	0.683101
34.07	0.567726	0.628602	0.706666	0.748938	0.782907	0.795174	0.813512	0.832799	0.658284	0.561531	0.563653	0.674862	0.614609	0.608901	0.612879	0.677375
34.17	0.564757	0.629906	0.706459	0.752463	0.780693	0.797782	0.811936	0.83325	0.657955	0.56344	0.56435	0.672555	0.614852	0.611633	0.614809	0.682577
34.27	0.563566	0.626067	0.705149	0.750221	0.779198	0.796352	0.807397	0.831193	0.658969	0.563708	0.561519	0.671038	0.612783	0.607998	0.611633	0.675765
34.37	0.563952	0.623974	0.699866	0.750283	0.779759	0.796863	0.809972	0.830576	0.658069	0.566702	0.561994	0.672256	0.606601	0.604957	0.607199	0.675358
34.47	0.564963	0.626921	0.704267	0.747757	0.781732	0.797514	0.805164	0.830098	0.654988	0.559431	0.561069	0.671461	0.607131	0.605454	0.609897	0.678648
34.57	0.568744	0.624732	0.703647	0.751526	0.778001	0.796373	0.807221	0.828994	0.659213	0.559419	0.557788	0.665796	0.604831	0.608513	0.609786	0.673209
34.67	0.566699	0.626773	0.704051	0.747159	0.782127	0.790829	0.806916	0.828134	0.657347	0.554806	0.561358	0.665552	0.607513	0.605093	0.613989	0.674288
34.77	0.571815	0.624122	0.701945	0.741439	0.778461	0.793024	0.809013	0.825581	0.652336	0.560982	0.560063	0.664057	0.607661	0.607862	0.608546	0.674445
34.87	0.569499	0.624214	0.700492	0.741806	0.781082	0.792337	0.802867	0.82501	0.656074	0.559144	0.560341	0.664445	0.603425	0.603779	0.603949	0.674005
34.97	0.565814	0.627779	0.703086	0.742161	0.775519	0.797517	0.804054	0.824455	0.651393	0.555481	0.558028	0.66484	0.601463	0.604828	0.606696	0.670397
35.07	0.564467	0.625398	0.694776	0.744322	0.776358	0.78666	0.798831	0.823749	0.651063	0.55619	0.558645	0.662401	0.604217	0.603175	0.606018	0.67406
35.17	0.564313	0.621723	0.700477	0.744742	0.773141	0.791643	0.804936	0.820684	0.653147	0.554217	0.555749	0.66637	0.609018	0.604442	0.60439	0.666108
35.27	0.569912	0.621565	0.700921	0.740977	0.775886	0.785679	0.801116	0.822016	0.651609	0.55607	0.555481	0.662262	0.599974	0.599015	0.601238	0.674128
35.37	0.567498	0.626801	0.697264	0.742811	0.780906	0.789383	0.798596	0.822377	0.649407	0.555426	0.55385	0.666687	0.602755	0.602555	0.60114	0.668997
35.47	0.570443	0.62612	0.696111	0.741396	0.775658	0.787924	0.797378	0.818596	0.65184	0.552891	0.554701	0.660619	0.603058	0.597427	0.603082	0.667039
35.57	0.56578	0.626061	0.699774	0.744677	0.777372	0.787021	0.796496	0.816093	0.648688	0.552811	0.554587	0.660338	0.599755	0.59574	0.597396	0.668846
35.67	0.56578	0.623542	0.695627	0.744467	0.777147	0.787471	0.796271	0.814403	0.648547	0.555336	0.552083	0.660804	0.601645	0.596446	0.599922	0.666885

## Sheet: primary data n=3
	mitochondria								mitoplasts
time (min)	0.1	0.16	0.25	0.4	0.63	1	1.58	2.5	0.1	0.16	0.25	0.4	0.63	1	1.58	2.5	PCP (µM)
0
0.37	0.000197	0.00031	0.000305	0.000578	0.000851	0.001264	0.001431	0.002122	0.000199	0.00029	0.000342	0.00059	0.000445	0.000789	0.001301	0.00211
0.47	0.000184	0.000379	0.000509	0.000829	0.001333	0.001569	0.002191	0.003379	0.000197	0.000325	0.000457	0.000807	0.000812	0.001414	0.002154	0.003881
0.57	0.000305	0.000499	0.000583	0.001114	0.001687	0.002501	0.003089	0.004891	0.000243	0.000413	0.000915	0.001554	0.00119	0.00299	0.004284	0.007218
0.67	0.000327	0.000701	0.000858	0.00149	0.002184	0.003509	0.004311	0.007348	0.000322	0.00059	0.001522	0.002049	0.001704	0.004395	0.006711	0.011593
0.77	0.000337	0.000816	0.000998	0.002267	0.002548	0.004306	0.006227	0.010248	0.000413	0.000804	0.001938	0.00284	0.002764	0.006886	0.010287	0.017717
0.87	0.000541	0.000989	0.001321	0.002427	0.003357	0.006288	0.008039	0.013956	0.000593	0.001262	0.002722	0.003979	0.004073	0.009252	0.014133	0.024366
0.97	0.000642	0.000989	0.002024	0.003613	0.004316	0.008819	0.011281	0.019241	0.000703	0.001835	0.003625	0.005118	0.004709	0.012333	0.018472	0.031835
1.07	0.000659	0.001456	0.002336	0.003925	0.005241	0.010818	0.015031	0.02568	0.000696	0.002179	0.004692	0.00666	0.0065	0.016061	0.024785	0.04091
1.17	0.000971	0.001527	0.002976	0.004582	0.006731	0.013659	0.018108	0.032674	0.001144	0.002727	0.005666	0.008516	0.007852	0.020198	0.029423	0.050602
1.27	0.00104	0.001849	0.003391	0.006239	0.007663	0.016745	0.02252	0.039653	0.00123	0.003101	0.00695	0.010135	0.009439	0.025021	0.03577	0.061051
1.37	0.001131	0.002164	0.0039	0.006679	0.008767	0.0198	0.02733	0.047584	0.001488	0.003849	0.008243	0.011903	0.011559	0.029755	0.043674	0.070495
1.47	0.001296	0.002489	0.004887	0.008421	0.009908	0.023924	0.032539	0.057057	0.00194	0.004513	0.01029	0.013782	0.013939	0.034125	0.048743	0.081208
1.57	0.001463	0.003027	0.00588	0.009148	0.011691	0.028055	0.038854	0.065217	0.002056	0.0053	0.011974	0.016438	0.01631	0.040689	0.056966	0.093966
1.67	0.001931	0.003352	0.006805	0.011155	0.013223	0.033021	0.045014	0.076958	0.002204	0.006067	0.013081	0.01854	0.018717	0.045897	0.064263	0.105338
1.77	0.002019	0.003559	0.007437	0.012805	0.01464	0.036441	0.050784	0.08828	0.002722	0.006488	0.015275	0.02201	0.021032	0.050781	0.073571	0.1156
1.87	0.002297	0.004434	0.008443	0.014367	0.016898	0.042363	0.058258	0.099942	0.003187	0.007806	0.016657	0.024234	0.02398	0.05754	0.079717	0.127503
1.97	0.002395	0.004872	0.009594	0.015722	0.018626	0.047698	0.06488	0.112002	0.003603	0.008917	0.019246	0.027308	0.026732	0.063284	0.088777	0.139372
2.07	0.002604	0.005263	0.011054	0.01797	0.020673	0.052092	0.072893	0.123716	0.003824	0.009456	0.021915	0.030001	0.029578	0.069516	0.095875	0.151452
2.17	0.003116	0.005683	0.012611	0.019327	0.023144	0.057758	0.081188	0.137702	0.003959	0.010703	0.023916	0.032359	0.032448	0.075367	0.106777	0.16375
2.27	0.003561	0.006429	0.013179	0.022084	0.025864	0.064868	0.090863	0.151796	0.004564	0.01163	0.025626	0.0359	0.036225	0.083246	0.113837	0.175865
2.37	0.003684	0.007009	0.015348	0.023941	0.029078	0.070746	0.097773	0.163696	0.005268	0.012847	0.02807	0.039117	0.039324	0.089714	0.121121	0.188274
2.47	0.003947	0.007793	0.017018	0.025294	0.030259	0.076446	0.106324	0.176342	0.005816	0.014549	0.031068	0.042749	0.042159	0.095159	0.12874	0.198596
2.57	0.004515	0.00848	0.018231	0.029083	0.032482	0.083915	0.114804	0.190886	0.006242	0.015038	0.033557	0.045922	0.045597	0.102242	0.140087	0.211854
2.67	0.004857	0.00923	0.019696	0.030677	0.035623	0.091844	0.12335	0.205403	0.006714	0.016617	0.037118	0.049463	0.049161	0.109369	0.147438	0.222126
2.77	0.005172	0.009766	0.021661	0.032615	0.038136	0.098105	0.133639	0.220095	0.007629	0.018061	0.038645	0.052793	0.052203	0.114238	0.154516	0.234014
2.87	0.005371	0.010117	0.023292	0.035726	0.04135	0.105392	0.141745	0.234678	0.007941	0.019903	0.041559	0.05646	0.055513	0.1227	0.16184	0.243686
2.97	0.00621	0.011359	0.024113	0.039643	0.044021	0.110797	0.15351	0.248669	0.008986	0.020904	0.044304	0.059588	0.059369	0.128231	0.172646	0.256959
3.07	0.006532	0.012323	0.026796	0.040895	0.047361	0.119289	0.1612	0.264421	0.009129	0.021676	0.048074	0.064371	0.064243	0.134901	0.17886	0.26594
3.17	0.006746	0.01314	0.028523	0.043942	0.049943	0.127063	0.1715	0.276493	0.010026	0.023562	0.051013	0.067551	0.067054	0.141064	0.187588	0.275736
3.27	0.007206	0.013922	0.03081	0.046901	0.053049	0.135287	0.180375	0.291278	0.010312	0.025151	0.053162	0.071053	0.069819	0.14732	0.195025	0.285676
3.37	0.007823	0.014554	0.032927	0.049424	0.055624	0.142925	0.19321	0.308402	0.010993	0.026494	0.057525	0.076392	0.073601	0.155618	0.201751	0.29811
3.47	0.008081	0.01553	0.033798	0.052616	0.060156	0.151975	0.202826	0.319095	0.011458	0.027682	0.058179	0.078702	0.078615	0.163177	0.209451	0.307851
3.57	0.008455	0.016344	0.036368	0.05512	0.061895	0.157769	0.211131	0.334266	0.012437	0.030239	0.062623	0.084264	0.082125	0.166306	0.218393	0.31605
3.67	0.009483	0.017628	0.038443	0.058073	0.066786	0.166003	0.220938	0.3517	0.013514	0.031629	0.064615	0.086109	0.085883	0.171618	0.226285	0.32845
3.77	0.009958	0.018575	0.040408	0.061634	0.06805	0.174748	0.23336	0.36362	0.014242	0.032903	0.068857	0.092026	0.088165	0.180505	0.231427	0.334943
3.87	0.010511	0.019522	0.043133	0.064851	0.072423	0.182743	0.243785	0.37658	0.014962	0.035718	0.071646	0.093944	0.094456	0.186122	0.239417	0.34459
3.97	0.011327	0.020014	0.044636	0.068557	0.075915	0.192457	0.251566	0.391791	0.015375	0.036587	0.073552	0.097271	0.097249	0.193613	0.247739	0.354597
4.07	0.01178	0.021769	0.046699	0.072585	0.079432	0.200224	0.26385	0.407048	0.015732	0.038702	0.07746	0.102342	0.100395	0.199065	0.256895	0.365615
4.17	0.01175	0.022758	0.047897	0.077944	0.084016	0.206911	0.275202	0.419231	0.017505	0.040398	0.080812	0.106176	0.105389	0.206746	0.263695	0.370698
4.27	0.012663	0.023154	0.051817	0.07999	0.086962	0.215752	0.285132	0.43108	0.018371	0.041751	0.085378	0.110915	0.109024	0.210184	0.26915	0.379163
4.37	0.013012	0.025018	0.054244	0.082981	0.091113	0.225414	0.29569	0.447897	0.018971	0.043219	0.087508	0.113694	0.112772	0.215329	0.277703	0.389974
4.47	0.013607	0.025586	0.056347	0.086775	0.094006	0.230844	0.303813	0.460761	0.019539	0.047115	0.090142	0.117735	0.116156	0.22356	0.283989	0.396601
4.57	0.014492	0.027165	0.059364	0.090189	0.098513	0.24092	0.316695	0.475168	0.020498	0.047749	0.095036	0.120686	0.12062	0.228077	0.293096	0.404719
4.67	0.014992	0.028117	0.060852	0.094126	0.102424	0.250398	0.325715	0.484181	0.02129	0.048976	0.098122	0.125418	0.124336	0.233709	0.299645	0.41419
4.77	0.015474	0.028995	0.063395	0.095872	0.106636	0.259015	0.339293	0.499859	0.022527	0.052333	0.100968	0.130218	0.127781	0.241099	0.305131	0.419404
4.87	0.016411	0.030212	0.065682	0.101974	0.109521	0.266341	0.349157	0.511757	0.023845	0.05286	0.103329	0.133715	0.130176	0.245656	0.310842	0.42654
4.97	0.017082	0.031609	0.069253	0.104991	0.1129	0.27459	0.358574	0.524333	0.024214	0.055589	0.107401	0.136674	0.134303	0.250786	0.31896	0.434103
5.07	0.018181	0.032337	0.072148	0.108213	0.116018	0.284011	0.367415	0.536718	0.024472	0.057623	0.11037	0.140353	0.138929	0.259256	0.319983	0.441638
5.17	0.018489	0.03426	0.074226	0.111963	0.121709	0.293098	0.375516	0.548038	0.025542	0.058673	0.112258	0.145333	0.142242	0.261514	0.330575	0.450208
5.27	0.019133	0.03532	0.075785	0.115551	0.126065	0.300899	0.389683	0.558271	0.026137	0.061887	0.115947	0.149479	0.148985	0.271132	0.336246	0.456548
5.37	0.019694	0.035278	0.078399	0.119225	0.127442	0.308754	0.399907	0.570489	0.028407	0.063351	0.119129	0.151115	0.150684	0.273232	0.343646	0.463626
5.47	0.021128	0.037533	0.081439	0.123372	0.133585	0.316951	0.404749	0.579347	0.028646	0.065205	0.124377	0.155409	0.15485	0.279545	0.347465	0.471206
5.57	0.020776	0.039036	0.084392	0.127784	0.136797	0.325974	0.418149	0.594843	0.029317	0.067554	0.126239	0.157932	0.157701	0.284365	0.352637	0.474941
5.67	0.022126	0.039717	0.085774	0.131347	0.141369	0.333563	0.427829	0.605056	0.030527	0.067736	0.129916	0.16392	0.162646	0.288969	0.360989	0.482036
5.77	0.02323	0.04077	0.087867	0.1369	0.147126	0.345235	0.435986	0.615211	0.031825	0.069784	0.131679	0.16561	0.165796	0.293745	0.365821	0.487953
5.87	0.022955	0.042752	0.091745	0.139942	0.148697	0.351129	0.444173	0.622183	0.033822	0.073599	0.134898	0.171276	0.169495	0.300471	0.366827	0.494711
5.97	0.025242	0.043367	0.094227	0.143378	0.153859	0.357526	0.45341	0.634875	0.033938	0.074678	0.138299	0.173843	0.171748	0.304504	0.377166	0.501851
6.07	0.024607	0.045123	0.096499	0.147003	0.159579	0.368283	0.463294	0.646672	0.034422	0.076803	0.141369	0.17736	0.174955	0.306688	0.380299	0.502483
6.17	0.025685	0.04692	0.101693	0.151769	0.163696	0.374773	0.470195	0.655513	0.036171	0.07893	0.144246	0.182697	0.177911	0.314609	0.382357	0.510485
6.27	0.026895	0.048273	0.103265	0.154954	0.167929	0.383545	0.481033	0.665257	0.037339	0.080352	0.145771	0.183838	0.181059	0.319085	0.392435	0.513168
6.37	0.027659	0.048797	0.105785	0.160413	0.1695	0.392057	0.490555	0.675768	0.038852	0.082199	0.150674	0.188451	0.18507	0.322629	0.397123	0.519469
6.47	0.028287	0.050299	0.109199	0.165174	0.173108	0.39803	0.496411	0.683647	0.039457	0.084953	0.153308	0.191737	0.187096	0.328898	0.403716	0.523153
6.57	0.030025	0.052673	0.111011	0.167902	0.179428	0.408521	0.507871	0.689471	0.04088	0.086038	0.154425	0.193901	0.192342	0.332759	0.402184	0.529965
6.67	0.029388	0.052717	0.114191	0.171738	0.184177	0.414697	0.513542	0.699416	0.040836	0.088408	0.15757	0.20077	0.195263	0.3375	0.412599	0.531118
6.77	0.03123	0.054197	0.115868	0.176448	0.187662	0.421029	0.526035	0.71155	0.042009	0.09009	0.161938	0.202322	0.197182	0.343356	0.412513	0.537584
6.87	0.030655	0.055053	0.119117	0.181403	0.192787	0.434194	0.534665	0.71835	0.04241	0.092136	0.16516	0.206564	0.203022	0.34462	0.419605	0.542485
6.97	0.031907	0.056762	0.12299	0.184374	0.194777	0.440851	0.542451	0.725856	0.044058	0.095147	0.166153	0.20693	0.204823	0.348375	0.421664	0.548196
7.07	0.03384	0.058833	0.123991	0.188987	0.197978	0.444616	0.551779	0.733251	0.044982	0.096103	0.170555	0.2113	0.207884	0.353237	0.427411	0.550308
7.17	0.034007	0.059155	0.126869	0.193783	0.203143	0.451455	0.556773	0.741192	0.046952	0.098486	0.172009	0.214072	0.211283	0.358625	0.432379	0.555571
7.27	0.034604	0.061034	0.129712	0.198232	0.207946	0.464108	0.561896	0.744484	0.046347	0.100638	0.176462	0.218567	0.214121	0.361603	0.43637	0.561756
7.37	0.035758	0.063508	0.133381	0.202595	0.21103	0.47213	0.570046	0.756503	0.049407	0.101275	0.176878	0.22066	0.216251	0.363883	0.441301	0.562044
7.47	0.036014	0.064042	0.134947	0.205243	0.217414	0.478911	0.580557	0.761171	0.049119	0.104015	0.180446	0.225166	0.21962	0.370481	0.444269	0.563345
7.57	0.037674	0.066865	0.138263	0.206581	0.218973	0.484181	0.586445	0.772117	0.050998	0.105471	0.183137	0.228058	0.222352	0.370425	0.447892	0.568733
7.67	0.038035	0.066464	0.141873	0.214308	0.22684	0.490152	0.593606	0.774972	0.052749	0.107539	0.186543	0.231107	0.225677	0.374647	0.45025	0.576425
7.77	0.038384	0.068117	0.143294	0.217451	0.23153	0.497884	0.602572	0.778081	0.052444	0.107615	0.187504	0.233183	0.229686	0.378678	0.451096	0.57718
7.87	0.039255	0.069939	0.147	0.222099	0.233788	0.507303	0.608866	0.792472	0.05311	0.111314	0.191299	0.235042	0.233355	0.380891	0.458285	0.581752
7.97	0.039511	0.070333	0.151031	0.226031	0.236306	0.510006	0.610066	0.801011	0.054603	0.114275	0.192861	0.237833	0.233842	0.388196	0.460176	0.583056
8.07	0.041367	0.07187	0.154041	0.229824	0.243327	0.52123	0.620938	0.803532	0.055552	0.113835	0.197752	0.240954	0.239255	0.392032	0.463575	0.586855
8.17	0.043064	0.073611	0.154986	0.234159	0.245051	0.526704	0.628456	0.813482	0.057444	0.117096	0.199442	0.244333	0.240425	0.39365	0.470335	0.589715
8.27	0.043271	0.074988	0.161075	0.239275	0.249306	0.529586	0.635094	0.814704	0.058668	0.117875	0.19909	0.247978	0.241222	0.398898	0.473298	0.590719
8.37	0.043374	0.076771	0.161276	0.243817	0.255036	0.539357	0.638598	0.826457	0.058799	0.119621	0.203738	0.249404	0.245189	0.400315	0.473891	0.596269
8.47	0.044515	0.077821	0.166237	0.247565	0.258034	0.544453	0.649967	0.828387	0.058826	0.121874	0.207852	0.253528	0.245602	0.405105	0.47786	0.599481
8.57	0.045388	0.079002	0.167577	0.250951	0.261381	0.552138	0.655894	0.833458	0.060284	0.12332	0.209758	0.257574	0.250422	0.406687	0.480971	0.597169
8.67	0.046379	0.080061	0.169257	0.25749	0.26716	0.55744	0.662773	0.833721	0.062411	0.125376	0.211116	0.260675	0.255385	0.409284	0.483669	0.59847
8.77	0.046992	0.0841	0.174618	0.260377	0.270554	0.562863	0.667787	0.840954	0.063245	0.126072	0.215036	0.261762	0.2575	0.412791	0.487457	0.606315
8.87	0.048674	0.084705	0.177156	0.265205	0.273611	0.566761	0.671356	0.846261	0.064615	0.127739	0.21568	0.264944	0.258494	0.413388	0.493391	0.608782
8.97	0.049581	0.085255	0.178956	0.269548	0.277366	0.572992	0.6809	0.854293	0.064568	0.128826	0.218358	0.264654	0.263361	0.416135	0.493976	0.606465
9.07	0.05084	0.087366	0.182615	0.269386	0.285243	0.580901	0.685774	0.852385	0.066624	0.132982	0.221504	0.271351	0.264721	0.42232	0.496064	0.611227
9.17	0.05028	0.089173	0.185483	0.274548	0.288713	0.583926	0.687784	0.864007	0.065788	0.132579	0.223894	0.271894	0.266767	0.422952	0.495142	0.613585
9.27	0.051145	0.08935	0.188707	0.281043	0.29255	0.590163	0.698002	0.865426	0.068073	0.134765	0.224406	0.275148	0.26987	0.427229	0.498658	0.614596
9.37	0.052412	0.091763	0.191034	0.280915	0.295609	0.597617	0.702468	0.871471	0.068574	0.136571	0.225131	0.278109	0.270532	0.428628	0.502598	0.616519
9.47	0.052215	0.09357	0.193232	0.28784	0.300997	0.598598	0.706427	0.874762	0.069674	0.138914	0.229105	0.279321	0.273409	0.431663	0.502741	0.618978
9.57	0.054136	0.092727	0.194494	0.291713	0.302596	0.607545	0.707937	0.882831	0.071078	0.139332	0.231353	0.281783	0.277069	0.431771	0.503171	0.623338
9.67	0.055203	0.095125	0.198429	0.293223	0.307684	0.610799	0.716891	0.88573	0.071447	0.141619	0.233446	0.283947	0.277248	0.431774	0.506727	0.624553
9.77	0.055779	0.096998	0.204225	0.300085	0.313126	0.612016	0.724114	0.88923	0.073385	0.143282	0.235768	0.285691	0.278414	0.43892	0.509145	0.62896
9.87	0.056044	0.09856	0.204796	0.302212	0.315618	0.623417	0.729112	0.89267	0.07413	0.14548	0.24075	0.290437	0.282206	0.443106	0.513102	0.628023
9.97	0.057559	0.098181	0.208652	0.307964	0.320743	0.62609	0.73074	0.897353	0.075293	0.144777	0.23866	0.292139	0.283568	0.442255	0.515441	0.629339
10.07	0.058349	0.099064	0.21012	0.310588	0.323138	0.633812	0.73482	0.899246	0.075804	0.149275	0.240686	0.292009	0.286522	0.445403	0.518163	0.628304
10.17	0.059374	0.102244	0.214261	0.31606	0.326652	0.638089	0.739986	0.904366	0.076257	0.14853	0.241348	0.294441	0.289812	0.444584	0.520118	0.631088
10.27	0.060333	0.103727	0.21448	0.319112	0.330459	0.643603	0.744425	0.905468	0.077467	0.149686	0.244928	0.296408	0.291433	0.449075	0.526128	0.63258
10.37	0.062596	0.105554	0.219227	0.324547	0.333863	0.646087	0.743449	0.909479	0.077501	0.152379	0.247085	0.300559	0.294448	0.452437	0.522511	0.631648
10.47	0.061194	0.107337	0.223474	0.326684	0.33962	0.651197	0.748579	0.911368	0.079594	0.154336	0.24818	0.301359	0.295351	0.450543	0.520871	0.636995
10.57	0.062365	0.107283	0.224152	0.329842	0.341408	0.653263	0.754708	0.919309	0.081203	0.155883	0.250639	0.307052	0.29784	0.455201	0.528519	0.633903
10.67	0.062613	0.108476	0.2272	0.334901	0.34387	0.660139	0.762949	0.920743	0.081153	0.156483	0.254488	0.306909	0.298577	0.454852	0.531362	0.639152
10.77	0.063875	0.111129	0.231125	0.338213	0.347261	0.666253	0.763404	0.925221	0.081554	0.156316	0.25508	0.308923	0.302062	0.458686	0.531042	0.633859
10.87	0.064802	0.112081	0.234963	0.337667	0.355013	0.67021	0.766148	0.924559	0.082644	0.156823	0.256925	0.309464	0.302175	0.458371	0.528239	0.640393
10.97	0.065699	0.113906	0.23519	0.344443	0.357179	0.67218	0.768521	0.932028	0.083492	0.160123	0.260213	0.313899	0.305434	0.462379	0.531679	0.64154
11.07	0.067352	0.115244	0.237947	0.352546	0.362066	0.678982	0.773548	0.934832	0.084461	0.163236	0.259472	0.312711	0.30749	0.461644	0.532815	0.641903
11.17	0.065894	0.117174	0.242248	0.352519	0.364828	0.680846	0.776639	0.932237	0.087188	0.163748	0.26324	0.314976	0.306868	0.466432	0.534441	0.642592
11.27	0.067927	0.1182	0.243197	0.355588	0.369962	0.686947	0.784676	0.933349	0.085873	0.16455	0.263538	0.31925	0.313013	0.464462	0.539231	0.64334
11.37	0.069723	0.11967	0.24771	0.360091	0.374662	0.689006	0.785208	0.941922	0.086291	0.16319	0.268326	0.316587	0.311575	0.467032	0.539229	0.647493
11.47	0.068855	0.121453	0.247552	0.363022	0.377348	0.695127	0.789514	0.941683	0.089385	0.166883	0.267455	0.321301	0.311712	0.469745	0.540151	0.644242
11.57	0.070704	0.121503	0.251354	0.368081	0.379015	0.697126	0.792912	0.944787	0.090595	0.169276	0.26866	0.323677	0.315404	0.472438	0.538936	0.646539
11.67	0.071326	0.123111	0.255284	0.372491	0.385591	0.702682	0.80031	0.9452	0.089104	0.170457	0.269034	0.32364	0.314344	0.475295	0.541032	0.644454
11.77	0.072214	0.126603	0.255764	0.374488	0.386654	0.706349	0.797086	0.949283	0.091443	0.173366	0.270987	0.326571	0.319624	0.47157	0.546909	0.646869
11.87	0.072512	0.126082	0.259598	0.375122	0.391535	0.708419	0.801717	0.953026	0.092316	0.173568	0.272939	0.329488	0.322326	0.474963	0.545163	0.648794
11.97	0.073599	0.127358	0.264566	0.38383	0.397703	0.711142	0.805413	0.952138	0.091952	0.174583	0.275315	0.330801	0.324663	0.475303	0.54654	0.647368
12.07	0.074154	0.129675	0.262657	0.38504	0.398222	0.718859	0.804503	0.957428	0.091647	0.175752	0.27713	0.332476	0.322228	0.476678	0.54823	0.652456
12.17	0.074513	0.130582	0.267086	0.388847	0.402066	0.720418	0.810361	0.958812	0.093423	0.177099	0.278323	0.33567	0.327201	0.47877	0.549221	0.651519
12.27	0.076697	0.13179	0.268641	0.394816	0.405452	0.723613	0.814092	0.957137	0.094729	0.177982	0.279887	0.33508	0.328826	0.474777	0.546636	0.649458
12.37	0.07696	0.13206	0.272199	0.394388	0.406906	0.728015	0.815513	0.959107	0.094731	0.178366	0.280718	0.338004	0.328268	0.482211	0.550087	0.650791
12.47	0.076419	0.134355	0.275824	0.398869	0.411177	0.726979	0.818331	0.959579	0.096917	0.180914	0.283197	0.338676	0.330634	0.484014	0.550195	0.647213
12.57	0.078861	0.134551	0.277164	0.401921	0.413383	0.732136	0.816322	0.965019	0.096868	0.181538	0.283404	0.341012	0.334711	0.483059	0.553392	0.647582
12.67	0.079565	0.137222	0.279388	0.40682	0.419315	0.733081	0.826555	0.967097	0.098053	0.18326	0.281675	0.341762	0.332476	0.484606	0.554024	0.65297
12.77	0.079636	0.139472	0.283504	0.410322	0.421863	0.742345	0.825043	0.965993	0.09751	0.184583	0.287085	0.341007	0.336133	0.484409	0.555519	0.65044
12.87	0.082174	0.140928	0.287316	0.412879	0.423127	0.743857	0.828968	0.964894	0.099027	0.183457	0.289999	0.344327	0.336253	0.486923	0.553992	0.65494
12.97	0.080755	0.14354	0.287712	0.419554	0.429639	0.744332	0.829814	0.970445	0.100041	0.185781	0.290449	0.349504	0.338732	0.490216	0.555219	0.653081
13.07	0.080647	0.142532	0.291652	0.418408	0.433188	0.745547	0.834255	0.969016	0.099797	0.187003	0.291441	0.348643	0.339406	0.4901	0.556572	0.652387
13.17	0.083866	0.143956	0.290757	0.421007	0.435303	0.749329	0.83455	0.972321	0.10146	0.188082	0.291721	0.350397	0.342687	0.48921	0.559621	0.654087
13.27	0.084323	0.144639	0.295452	0.425682	0.438492	0.75186	0.837423	0.970981	0.102185	0.189157	0.294283	0.353557	0.342603	0.491	0.55576	0.65586
13.37	0.084092	0.145237	0.298912	0.428569	0.442324	0.75514	0.838106	0.976416	0.105825	0.191134	0.292845	0.351513	0.341467	0.490848	0.552853	0.655429
13.47	0.086033	0.148643	0.300978	0.434614	0.444673	0.757998	0.84105	0.976339	0.104691	0.189273	0.29568	0.355057	0.345193	0.493125	0.556287	0.65494
13.57	0.085838	0.148675	0.30322	0.434326	0.446116	0.762019	0.84395	0.978376	0.104211	0.192455	0.298403	0.352959	0.346779	0.494721	0.56228	0.655651
13.67	0.086994	0.151562	0.306287	0.436948	0.452451	0.758224	0.84254	0.978995	0.10478	0.192868	0.298265	0.357088	0.34731	0.496504	0.561444	0.654419
13.77	0.086168	0.152519	0.30658	0.442201	0.453042	0.766291	0.848027	0.981177	0.106472	0.195573	0.299669	0.35727	0.349059	0.49448	0.56013	0.653364
13.87	0.088799	0.152236	0.309334	0.445551	0.453912	0.765433	0.848915	0.982751	0.107551	0.195219	0.301543	0.357954	0.348791	0.494692	0.563827	0.656917
13.97	0.088979	0.153535	0.313321	0.445917	0.458641	0.770563	0.849117	0.982038	0.108572	0.195878	0.303043	0.361921	0.353151	0.496398	0.560777	0.654928
14.07	0.089134	0.156077	0.313026	0.453885	0.464568	0.770395	0.848782	0.98473	0.108419	0.195866	0.301875	0.363477	0.351857	0.497512	0.560775	0.653467
14.17	0.090245	0.155824	0.317873	0.455046	0.466567	0.775501	0.856189	0.98083	0.109533	0.199685	0.303311	0.361466	0.355559	0.496669	0.55836	0.649217
14.27	0.090973	0.158057	0.321645	0.456054	0.470197	0.776302	0.858661	0.987517	0.109969	0.198382	0.304578	0.365056	0.356338	0.500412	0.565501	0.653833
14.37	0.092387	0.160214	0.320787	0.463474	0.472585	0.776366	0.855611	0.980997	0.111889	0.199169	0.308761	0.363625	0.353094	0.500227	0.562026	0.655427
14.47	0.093211	0.1624	0.323952	0.467367	0.479479	0.780793	0.859163	0.985313	0.111058	0.201065	0.307271	0.366788	0.360204	0.50322	0.563207	0.656548
14.57	0.09357	0.162619	0.325415	0.468063	0.476368	0.786036	0.861223	0.987536	0.112546	0.203131	0.308218	0.364633	0.359562	0.501944	0.565831	0.654033
14.67	0.09478	0.165452	0.327813	0.469329	0.482034	0.781042	0.862962	0.987812	0.111582	0.201367	0.311545	0.36529	0.361945	0.500476	0.566185	0.653696
14.77	0.096539	0.16435	0.330255	0.474511	0.482132	0.781076	0.865075	0.987256	0.115094	0.203652	0.311771	0.3677	0.361766	0.502001	0.565265	0.652911
14.87	0.095471	0.164542	0.335643	0.473987	0.486815	0.788493	0.866958	0.990999	0.113721	0.203819	0.312025	0.370654	0.362725	0.502266	0.562354	0.652798
14.97	0.096625	0.16769	0.336214	0.476646	0.486984	0.791115	0.867654	0.991533	0.115618	0.204444	0.313067	0.372444	0.362142	0.506646	0.565199	0.651281
15.07	0.098336	0.169043	0.337185	0.480443	0.489311	0.794417	0.866946	0.993544	0.114828	0.208696	0.31424	0.372557	0.362361	0.504632	0.567469	0.651352
15.17	0.097291	0.170341	0.337849	0.480846	0.498081	0.794322	0.869553	0.990399	0.113301	0.205088	0.315042	0.374001	0.363116	0.508823	0.56378	0.65674
15.27	0.100409	0.172237	0.343956	0.485686	0.497874	0.797135	0.871592	0.991953	0.115209	0.20663	0.314831	0.376135	0.365971	0.507409	0.565255	0.654989
15.37	0.100181	0.171487	0.34265	0.487579	0.502092	0.79801	0.871093	0.991828	0.114958	0.20679	0.319026	0.377385	0.365885	0.507342	0.563632	0.651613
15.47	0.100306	0.17253	0.344241	0.491986	0.502623	0.800162	0.872984	0.997477	0.118906	0.209992	0.320037	0.376735	0.370715	0.508136	0.566338	0.65029
15.57	0.100911	0.175142	0.348919	0.494667	0.503766	0.79833	0.872829	0.992386	0.117819	0.209488	0.320834	0.381595	0.369102	0.507561	0.567196	0.651463
15.67	0.103127	0.175855	0.352157	0.498919	0.507984	0.801997	0.875856	0.993667	0.119899	0.210267	0.322799	0.379527	0.368866	0.511516	0.568091	0.650083
15.77	0.103437	0.175397	0.35306	0.499741	0.511916	0.808052	0.87428	0.992192	0.119921	0.211768	0.319442	0.376642	0.370056	0.509305	0.565993	0.64919
15.87	0.103897	0.178764	0.353901	0.499694	0.51351	0.810624	0.874026	0.989602	0.119378	0.212958	0.323694	0.380936	0.371436	0.509137	0.56707	0.652493
15.97	0.10307	0.17994	0.354688	0.503752	0.513643	0.808332	0.881485	0.9956	0.120128	0.215607	0.324014	0.380321	0.372193	0.508498	0.569702	0.651627
16.07	0.104981	0.182955	0.35788	0.506366	0.514422	0.810435	0.87579	0.993916	0.121872	0.214854	0.324348	0.384128	0.374247	0.511048	0.564923	0.652328
16.17	0.105321	0.180948	0.358829	0.509076	0.521488	0.81012	0.881136	0.98884	0.121967	0.216042	0.326502	0.381856	0.371972	0.508825	0.56948	0.6536
16.27	0.104492	0.181359	0.360994	0.510522	0.522226	0.814333	0.877782	0.999769	0.122371	0.217018	0.32526	0.384229	0.374972	0.508432	0.563952	0.651057
16.37	0.10669	0.183855	0.365833	0.515064	0.52454	0.816696	0.879523	0.994823	0.122742	0.215702	0.326003	0.38503	0.374748	0.506907	0.569163	0.651372
16.47	0.107918	0.186174	0.367375	0.516928	0.525093	0.814913	0.881478	0.995822	0.122415	0.216416	0.32832	0.387851	0.377852	0.510751	0.568957	0.652643
16.57	0.107436	0.185441	0.370922	0.518702	0.527481	0.818085	0.884237	0.99971	0.123332	0.218366	0.327341	0.386437	0.374426	0.511702	0.569348	0.650442
16.67	0.108215	0.189209	0.369899	0.526613	0.53009	0.816888	0.886529	0.9973	0.124478	0.218132	0.330167	0.387241	0.37899	0.510979	0.568148	0.655348
16.77	0.110286	0.188114	0.373088	0.52662	0.537353	0.816917	0.887602	0.993967	0.125592	0.220186	0.331381	0.388476	0.381007	0.50838	0.571192	0.645964
16.87	0.110687	0.190352	0.374805	0.526957	0.536025	0.817436	0.884832	0.999191	0.126038	0.218698	0.329387	0.389939	0.378818	0.511673	0.567865	0.652739
16.97	0.111884	0.192477	0.372272	0.528435	0.536022	0.823481	0.886807	0.991016	0.126805	0.220011	0.332225	0.39017	0.381833	0.511951	0.564242	0.65119
17.07	0.110997	0.193675	0.379064	0.528499	0.538135	0.82402	0.890661	0.991545	0.126237	0.220348	0.329247	0.387625	0.383144	0.510315	0.570499	0.648836
17.17	0.112723	0.192971	0.38146	0.537584	0.541051	0.827723	0.886401	0.994823	0.12802	0.221919	0.335262	0.388933	0.380432	0.511594	0.567781	0.648942
17.27	0.112649	0.195728	0.383161	0.537119	0.544659	0.823877	0.89329	1	0.126928	0.221974	0.334625	0.392585	0.384986	0.511196	0.566967	0.647166
17.37	0.113734	0.198143	0.383631	0.538317	0.548973	0.825707	0.889153	0.994538	0.127798	0.222392	0.334306	0.392794	0.381779	0.513628	0.56618	0.647142
17.47	0.11443	0.198856	0.385817	0.539977	0.546137	0.823629	0.8856	0.989027	0.127304	0.223361	0.333051	0.39228	0.384199	0.512064	0.56601	0.646812
17.57	0.117049	0.19759	0.390074	0.542677	0.55182	0.828038	0.889532	0.991968	0.129252	0.223678	0.335105	0.395745	0.3837	0.5141	0.563532	0.644729
17.67	0.11637	0.200448	0.39081	0.545134	0.548692	0.825286	0.888465	0.998465	0.129043	0.225311	0.336856	0.394646	0.385648	0.512408	0.567068	0.648853
17.77	0.116377	0.199658	0.38823	0.548682	0.552357	0.832858	0.89207	0.99578	0.131659	0.224386	0.338663	0.395315	0.387856	0.511752	0.563551	0.645287
17.87	0.117172	0.204963	0.396215	0.549956	0.555067	0.829243	0.893339	0.991609	0.132183	0.227453	0.33752	0.396955	0.383803	0.513417	0.568819	0.647009
17.97	0.117765	0.204832	0.396687	0.549457	0.55908	0.830544	0.89132	0.995409	0.130745	0.22655	0.342684	0.397317	0.38674	0.509583	0.565787	0.644513
18.07	0.117644	0.204842	0.393001	0.552984	0.561119	0.833003	0.889389	0.99233	0.130816	0.226853	0.339472	0.396333	0.388493	0.512398	0.56347	0.64284
18.17	0.119857	0.204914	0.39922	0.558768	0.562494	0.831255	0.887894	0.990913	0.130282	0.230788	0.340296	0.397376	0.388053	0.51232	0.563723	0.644832
18.27	0.118323	0.205678	0.398109	0.559024	0.564287	0.836139	0.892441	0.995298	0.131256	0.226526	0.341676	0.397273	0.390994	0.512787	0.562914	0.644127
18.37	0.119631	0.20833	0.402963	0.557887	0.564454	0.834572	0.889483	0.991983	0.131588	0.22975	0.34113	0.398768	0.389349	0.512098	0.560588	0.645211
18.47	0.120162	0.206625	0.405391	0.560376	0.56969	0.836963	0.89265	0.998977	0.132773	0.229174	0.342795	0.397555	0.390097	0.511235	0.562039	0.643915
18.57	0.122174	0.208263	0.405875	0.564132	0.569257	0.835787	0.893103	0.992211	0.132417	0.231407	0.342188	0.399978	0.38957	0.51046	0.56075	0.641847
18.67	0.121931	0.210073	0.409837	0.565489	0.57582	0.839262	0.893125	0.993894	0.134325	0.229209	0.343808	0.39969	0.390239	0.510119	0.566893	0.64048
18.77	0.121217	0.212498	0.409035	0.56621	0.57618	0.841313	0.892535	0.99414	0.135095	0.233439	0.34417	0.402341	0.390879	0.511026	0.563487	0.637868
18.87	0.123138	0.213054	0.411787	0.566918	0.573292	0.836764	0.89175	0.991584	0.132965	0.230807	0.34432	0.399186	0.391284	0.512866	0.564488	0.641362
18.97	0.124542	0.214534	0.412687	0.57085	0.572564	0.83972	0.889685	0.990674	0.1369	0.233389	0.344007	0.403445	0.393525	0.51092	0.562875	0.639139
19.07	0.124129	0.213932	0.417975	0.570722	0.581674	0.8448	0.892341	0.992428	0.137665	0.232962	0.347777	0.401926	0.38945	0.512283	0.563549	0.637538
19.17	0.125194	0.213403	0.415078	0.576172	0.577682	0.84244	0.896775	0.990163	0.136657	0.232349	0.346117	0.402098	0.392927	0.513021	0.562649	0.641011
19.27	0.125811	0.215848	0.4204	0.576047	0.582401	0.841562	0.893929	0.98867	0.134992	0.233478	0.345375	0.403487	0.392433	0.51245	0.561999	0.634558
19.37	0.126898	0.218022	0.41858	0.578949	0.586464	0.838753	0.892033	0.98974	0.137033	0.232298	0.346855	0.404454	0.392401	0.51515	0.5606	0.636638
19.47	0.126067	0.219519	0.42202	0.577972	0.587057	0.842619	0.893302	0.989046	0.137635	0.234189	0.345193	0.403091	0.398126	0.509993	0.563886	0.638259
19.57	0.12772	0.220705	0.42507	0.581932	0.585574	0.84197	0.895225	0.988749	0.13753	0.23489	0.347268	0.405027	0.394314	0.512875	0.562149	0.638834
19.67	0.129259	0.221809	0.424086	0.583889	0.587441	0.841387	0.895503	0.98745	0.138496	0.235608	0.346435	0.404235	0.395851	0.512573	0.565853	0.633522
19.77	0.129476	0.222731	0.425065	0.587377	0.593011	0.842022	0.893391	0.987883	0.139495	0.238099	0.347814	0.406699	0.392775	0.515133	0.560964	0.634528
19.87	0.128713	0.221966	0.426986	0.5873	0.593498	0.84767	0.894903	0.982974	0.139209	0.236697	0.348355	0.405651	0.396262	0.508594	0.562966	0.634149
19.97	0.130523	0.223666	0.426808	0.587384	0.592966	0.846018	0.893784	0.986752	0.139219	0.237838	0.348483	0.405464	0.397024	0.509445	0.56425	0.633874
20.07	0.129547	0.224352	0.430888	0.589487	0.594314	0.84575	0.894325	0.99004	0.139775	0.238355	0.349511	0.405	0.394113	0.51229	0.563598	0.633584
20.17	0.131263	0.223459	0.431921	0.594317	0.594169	0.846795	0.893081	0.988941	0.139905	0.236732	0.350768	0.407252	0.396547	0.510834	0.560054	0.630684
20.27	0.130513	0.228655	0.434046	0.593166	0.597206	0.845219	0.898772	0.989073	0.139773	0.238505	0.350389	0.410976	0.400101	0.511225	0.559638	0.632182
20.37	0.132314	0.227207	0.43593	0.596547	0.598446	0.847638	0.892729	0.983375	0.139445	0.239211	0.349833	0.408425	0.39985	0.511294	0.561065	0.627996
20.47	0.134104	0.230842	0.435905	0.594088	0.603962	0.845796	0.893479	0.981167	0.140048	0.237442	0.351936	0.406674	0.398141	0.511006	0.555347	0.631725
20.57	0.133765	0.229391	0.439656	0.601783	0.603672	0.847973	0.897104	0.982888	0.140109	0.239152	0.351833	0.407257	0.399966	0.507259	0.558512	0.62658
20.67	0.132476	0.232718	0.438716	0.601225	0.603155	0.846451	0.890777	0.985498	0.140387	0.238431	0.350881	0.41072	0.400379	0.507977	0.558965	0.628348
20.77	0.135368	0.229378	0.440322	0.603514	0.606532	0.849453	0.897262	0.982979	0.143429	0.237666	0.352389	0.409166	0.401188	0.510893	0.558025	0.628375
20.87	0.13553	0.233653	0.441746	0.600121	0.604887	0.849544	0.895865	0.984996	0.141189	0.239629	0.353864	0.406635	0.399582	0.5111	0.558318	0.626863
20.97	0.135235	0.235138	0.44453	0.603138	0.610826	0.851207	0.895112	0.983346	0.144081	0.239511	0.353653	0.410383	0.39924	0.510478	0.558638	0.627551
21.07	0.135437	0.235755	0.443613	0.605892	0.609899	0.850117	0.892791	0.978968	0.141701	0.243369	0.354228	0.412223	0.401198	0.510601	0.557937	0.623798
21.17	0.137365	0.234634	0.443276	0.605437	0.614377	0.847159	0.898235	0.976497	0.142532	0.241323	0.356075	0.413541	0.39865	0.508697	0.555352	0.624598
21.27	0.138868	0.235613	0.447393	0.609043	0.613199	0.847835	0.894704	0.978811	0.144106	0.240895	0.356119	0.41026	0.401567	0.506897	0.557248	0.624047
21.37	0.136883	0.236825	0.44903	0.609567	0.612633	0.847695	0.894731	0.978277	0.143998	0.243438	0.355182	0.409389	0.402425	0.503951	0.556203	0.623415
21.47	0.139266	0.238574	0.449151	0.610609	0.613841	0.851509	0.895319	0.975911	0.144893	0.243273	0.353358	0.413447	0.401109	0.509674	0.559085	0.623769
21.57	0.140139	0.237868	0.451217	0.611871	0.616551	0.85285	0.893489	0.975073	0.144504	0.241859	0.354644	0.409938	0.401899	0.506095	0.552214	0.622726
21.67	0.13947	0.242073	0.45238	0.616959	0.614306	0.849003	0.892874	0.97918	0.144942	0.244722	0.354486	0.412164	0.399951	0.507851	0.557314	0.62221
21.77	0.139121	0.240482	0.454908	0.614684	0.616199	0.851224	0.889458	0.975629	0.145404	0.242587	0.357317	0.412087	0.400755	0.507283	0.553473	0.620557
21.87	0.1407	0.241891	0.45527	0.613942	0.619045	0.850223	0.895594	0.976015	0.146398	0.244887	0.354971	0.412813	0.401776	0.506904	0.555832	0.622738
21.97	0.140909	0.244468	0.457967	0.620021	0.620257	0.851411	0.88738	0.973873	0.147145	0.246126	0.356095	0.410299	0.400991	0.506442	0.554144	0.622342
22.07	0.141428	0.245715	0.459571	0.619642	0.621602	0.846827	0.889977	0.972717	0.147679	0.245302	0.359073	0.412397	0.402818	0.509086	0.551056	0.622497
22.17	0.143188	0.243986	0.461568	0.622856	0.621179	0.849215	0.893506	0.970936	0.146159	0.245477	0.356188	0.410206	0.400066	0.503609	0.552084	0.616994
22.27	0.143766	0.245612	0.461708	0.621278	0.622576	0.848472	0.890233	0.978531	0.146609	0.246761	0.354137	0.416089	0.403824	0.507364	0.551464	0.615139
22.37	0.14234	0.2486	0.460751	0.623786	0.626796	0.846276	0.891391	0.974384	0.148387	0.246438	0.357371	0.414724	0.40092	0.510453	0.552243	0.620665
22.47	0.143985	0.247006	0.463083	0.626285	0.628282	0.850122	0.888686	0.969274	0.147369	0.245642	0.358475	0.415705	0.404252	0.503688	0.554341	0.616578
22.57	0.14477	0.249281	0.465734	0.629268	0.627647	0.848996	0.887656	0.972643	0.146885	0.245435	0.356626	0.411536	0.401308	0.505677	0.55307	0.616706
22.67	0.144499	0.249203	0.462738	0.625835	0.627305	0.850474	0.890641	0.970914	0.146899	0.247523	0.357059	0.414876	0.398148	0.509231	0.547293	0.616315
22.77	0.145289	0.249586	0.466784	0.62945	0.62719	0.851143	0.889463	0.964105	0.148048	0.245752	0.357489	0.41374	0.402902	0.50569	0.547937	0.615953
22.87	0.148011	0.248507	0.467554	0.628087	0.628171	0.853135	0.89345	0.964658	0.148884	0.24982	0.356181	0.413924	0.403271	0.503953	0.549944	0.614453
22.97	0.147947	0.251765	0.467335	0.628658	0.63441	0.84981	0.893789	0.96511	0.146752	0.245238	0.357843	0.414318	0.401854	0.507455	0.549125	0.614128
23.07	0.147163	0.251908	0.471016	0.629477	0.633847	0.852776	0.892623	0.962912	0.149447	0.245942	0.358082	0.415471	0.402939	0.50279	0.546973	0.612382
23.17	0.147932	0.254215	0.471582	0.628589	0.632671	0.850088	0.888428	0.9635	0.149942	0.245737	0.356906	0.415577	0.402595	0.503029	0.549206	0.611207
23.27	0.14868	0.254065	0.471321	0.633168	0.636186	0.845162	0.884712	0.96483	0.151791	0.250565	0.360325	0.413951	0.402228	0.502207	0.549666	0.6128
23.37	0.149492	0.256893	0.471774	0.63337	0.6335	0.849318	0.887983	0.963377	0.147332	0.249053	0.359459	0.410631	0.403807	0.505431	0.550881	0.611568
23.47	0.149659	0.258607	0.477858	0.635972	0.634302	0.84752	0.887838	0.962496	0.150943	0.249729	0.357678	0.414387	0.400121	0.501258	0.546201	0.612695
23.57	0.150539	0.2572	0.478057	0.637374	0.639132	0.851873	0.888566	0.964141	0.14779	0.248903	0.360991	0.416421	0.40516	0.502429	0.545717	0.609608
23.67	0.150079	0.258624	0.476218	0.637366	0.634009	0.851522	0.884272	0.959348	0.150084	0.249134	0.360721	0.414136	0.403352	0.502028	0.543356	0.608322
23.77	0.150736	0.258759	0.47897	0.641239	0.636205	0.841087	0.886869	0.958195	0.148764	0.248836	0.361584	0.417257	0.402877	0.500464	0.545982	0.604419
23.87	0.152199	0.258531	0.477162	0.640966	0.640248	0.849714	0.886561	0.957342	0.149014	0.24818	0.361677	0.413624	0.401805	0.500764	0.546363	0.605297
23.97	0.151727	0.25992	0.480381	0.639375	0.643234	0.844968	0.885765	0.958419	0.149969	0.250526	0.361249	0.414817	0.400484	0.50116	0.541037	0.603389
24.07	0.152556	0.259116	0.480089	0.646397	0.640401	0.845772	0.885698	0.959641	0.151931	0.249294	0.360167	0.411721	0.408553	0.500931	0.540584	0.605885
24.17	0.152236	0.263678	0.482307	0.645801	0.640868	0.847127	0.883598	0.957981	0.153045	0.250243	0.360603	0.415636	0.403158	0.498595	0.541509	0.604149
24.27	0.152037	0.263006	0.482599	0.644564	0.643143	0.843131	0.883273	0.95351	0.150126	0.251509	0.358736	0.415604	0.405236	0.494539	0.542099	0.601525
24.37	0.15354	0.267864	0.483204	0.644114	0.64274	0.847186	0.881576	0.953633	0.151889	0.249576	0.361535	0.416952	0.406431	0.498836	0.541646	0.600497
24.47	0.155153	0.264263	0.487206	0.652594	0.645142	0.845728	0.88212	0.953185	0.152027	0.249254	0.358212	0.41479	0.407319	0.499721	0.536981	0.601008
24.57	0.155401	0.264944	0.484459	0.643623	0.643229	0.849286	0.881485	0.94974	0.151766	0.251866	0.362299	0.41269	0.40515	0.498501	0.542259	0.600184
24.67	0.157634	0.266939	0.486635	0.647279	0.643868	0.845132	0.884225	0.951004	0.153473	0.249808	0.358574	0.416312	0.403475	0.498919	0.539888	0.599149
24.77	0.156756	0.268026	0.48515	0.650668	0.650172	0.846979	0.881982	0.947733	0.152743	0.249544	0.361881	0.415535	0.40455	0.494057	0.541851	0.600221
24.87	0.154808	0.267079	0.487284	0.647169	0.650698	0.847336	0.877789	0.953943	0.153011	0.248814	0.364252	0.416253	0.402777	0.497067	0.537852	0.59999
24.97	0.157656	0.266312	0.490098	0.651753	0.648571	0.847496	0.883369	0.949162	0.153805	0.250951	0.362887	0.412786	0.403101	0.496445	0.539192	0.596505
25.07	0.157231	0.271993	0.490523	0.648981	0.649943	0.844601	0.881916	0.947482	0.150859	0.251234	0.361579	0.415422	0.406333	0.497933	0.533993	0.592393
25.17	0.158416	0.270657	0.491699	0.644392	0.650553	0.847983	0.877506	0.949792	0.154476	0.24935	0.362017	0.413142	0.405132	0.49719	0.533076	0.592512
25.27	0.159053	0.270318	0.494901	0.65267	0.650954	0.849916	0.876496	0.950303	0.153429	0.25252	0.362275	0.416349	0.405516	0.498312	0.53553	0.597329
25.37	0.160285	0.271142	0.492109	0.652023	0.6522	0.846463	0.876788	0.946073	0.153736	0.250919	0.363972	0.41525	0.404579	0.497144	0.534094	0.593323
25.47	0.158069	0.271496	0.494532	0.651354	0.654298	0.847943	0.873021	0.944487	0.154036	0.252105	0.363635	0.413725	0.401399	0.494421	0.53632	0.593222
25.57	0.159422	0.274663	0.494812	0.653408	0.653221	0.84194	0.872959	0.942807	0.155283	0.250725	0.360718	0.41463	0.406726	0.491967	0.535597	0.595367
25.67	0.162127	0.274117	0.49497	0.655107	0.65633	0.843337	0.874885	0.940737	0.15424	0.251377	0.361768	0.416475	0.405194	0.495798	0.531895	0.588377
25.77	0.157223	0.274176	0.500358	0.655579	0.655427	0.842868	0.873249	0.936807	0.154963	0.253772	0.361906	0.415607	0.402373	0.492262	0.535363	0.590756
25.87	0.161151	0.276515	0.499357	0.660132	0.651539	0.842452	0.870753	0.940931	0.154258	0.253856	0.36196	0.415501	0.403101	0.495016	0.535425	0.588894
25.97	0.161279	0.274017	0.500481	0.6595	0.655457	0.842334	0.875089	0.940095	0.154066	0.252018	0.362009	0.41749	0.403231	0.492805	0.532867	0.58733
26.07	0.161409	0.275824	0.498813	0.659691	0.656098	0.843025	0.874767	0.938823	0.156092	0.253774	0.360671	0.413993	0.403271	0.49448	0.534404	0.588237
26.17	0.160831	0.276872	0.501814	0.658759	0.657847	0.839702	0.869715	0.93751	0.155554	0.253602	0.362331	0.412424	0.402088	0.492038	0.531625	0.584957
26.27	0.161594	0.280403	0.499354	0.660832	0.654583	0.847164	0.87277	0.933801	0.154435	0.252272	0.363384	0.415132	0.403059	0.490626	0.525794	0.589833
26.37	0.163261	0.277927	0.503292	0.662802	0.657043	0.844348	0.871036	0.940255	0.155276	0.254571	0.36076	0.412798	0.402267	0.491952	0.531177	0.582783
26.47	0.163445	0.281298	0.504898	0.661853	0.658061	0.840757	0.873468	0.928391	0.157201	0.253656	0.364294	0.414185	0.402986	0.492353	0.531431	0.585835
26.57	0.163635	0.281001	0.50371	0.665815	0.66081	0.840595	0.870419	0.938307	0.155728	0.255388	0.360541	0.414743	0.405504	0.491802	0.522717	0.585515
26.67	0.16361	0.282363	0.502178	0.663506	0.658558	0.845349	0.86897	0.938848	0.155298	0.253897	0.362223	0.413664	0.40558	0.490617	0.530806	0.584236
26.77	0.166251	0.280942	0.503407	0.659013	0.661201	0.841156	0.869322	0.929333	0.15651	0.254365	0.362629	0.412995	0.403259	0.488866	0.524724	0.585908
26.87	0.165873	0.283817	0.505252	0.662628	0.658946	0.839926	0.866378	0.931787	0.156995	0.254989	0.363662	0.414534	0.403421	0.490105	0.526512	0.584344
26.97	0.165671	0.283593	0.508301	0.662645	0.661838	0.840998	0.870033	0.933848	0.155999	0.25436	0.362602	0.415238	0.403777	0.48648	0.527041	0.582227
27.07	0.166802	0.282963	0.508309	0.666245	0.662925	0.838603	0.86746	0.923482	0.155834	0.253285	0.362147	0.414849	0.399575	0.489407	0.525469	0.578875
27.17	0.165344	0.286153	0.509376	0.666796	0.661919	0.838797	0.869042	0.925145	0.15366	0.25617	0.362494	0.414726	0.404813	0.487725	0.523795	0.578644
27.27	0.16591	0.287432	0.507873	0.66669	0.663125	0.840263	0.867283	0.928044	0.156579	0.256123	0.361562	0.413496	0.40485	0.487577	0.525681	0.578521
27.37	0.166283	0.28679	0.508874	0.666676	0.661135	0.838256	0.865552	0.922164	0.156161	0.25419	0.363131	0.413629	0.402056	0.487306	0.524001	0.575164
27.47	0.166684	0.290302	0.512027	0.66942	0.661568	0.837575	0.867635	0.922373	0.157283	0.254888	0.361485	0.414446	0.399361	0.485413	0.524761	0.581354
27.57	0.168285	0.291775	0.511095	0.669322	0.66065	0.834949	0.864344	0.923775	0.157956	0.255619	0.363219	0.414148	0.403416	0.487941	0.524537	0.57704
27.67	0.168949	0.288639	0.51036	0.667561	0.663309	0.834779	0.864893	0.926188	0.155623	0.25603	0.363266	0.414603	0.398704	0.483667	0.523386	0.577412
27.77	0.169141	0.291991	0.51458	0.667773	0.662237	0.836589	0.865003	0.918829	0.156065	0.25479	0.363022	0.412911	0.401476	0.486751	0.521011	0.577721
27.87	0.166773	0.289935	0.511196	0.665463	0.662446	0.835374	0.857589	0.923131	0.158674	0.253836	0.365536	0.411128	0.399791	0.486156	0.521503	0.575653
27.97	0.168615	0.288448	0.511668	0.671255	0.662751	0.836358	0.856512	0.915254	0.156855	0.254785	0.363057	0.411249	0.40075	0.487471	0.520637	0.573528
28.07	0.17146	0.289008	0.514877	0.67383	0.669821	0.835084	0.856084	0.915777	0.157878	0.25403	0.362329	0.414074	0.401075	0.484631	0.521508	0.574421
28.17	0.17039	0.293617	0.515138	0.668705	0.669472	0.832502	0.856725	0.911651	0.15592	0.257075	0.360772	0.411795	0.404087	0.484262	0.518505	0.573755
28.27	0.171374	0.294534	0.516235	0.671026	0.667711	0.838697	0.857869	0.915925	0.157774	0.255097	0.361862	0.411721	0.401242	0.483052	0.518943	0.568848
28.37	0.17209	0.293147	0.518205	0.673102	0.664396	0.834081	0.856915	0.913333	0.156636	0.252911	0.36073	0.410085	0.405376	0.484454	0.514159	0.572112
28.47	0.171623	0.294003	0.518404	0.672807	0.669428	0.835674	0.85737	0.915118	0.157489	0.255058	0.361267	0.413113	0.400273	0.48242	0.515165	0.573056
28.57	0.172879	0.295316	0.516166	0.674597	0.666174	0.829509	0.852936	0.908687	0.160293	0.25602	0.36315	0.413796	0.397868	0.479282	0.517477	0.564968
28.67	0.172685	0.29692	0.515957	0.676584	0.663808	0.830352	0.856263	0.90624	0.157686	0.25854	0.360106	0.412419	0.399348	0.483504	0.515598	0.56828
28.77	0.173511	0.295698	0.519973	0.673881	0.665264	0.82911	0.859554	0.907637	0.15865	0.256531	0.362071	0.410538	0.400175	0.480546	0.514115	0.569404
28.87	0.173425	0.295862	0.517472	0.67348	0.668092	0.827025	0.854864	0.907684	0.158714	0.257975	0.362491	0.413612	0.40225	0.478935	0.515084	0.563185
28.97	0.174377	0.296354	0.518549	0.676872	0.668577	0.829551	0.855294	0.904595	0.160253	0.254911	0.363583	0.412014	0.401847	0.479366	0.514791	0.569926
29.07	0.17451	0.298479	0.520502	0.677499	0.669206	0.827672	0.852766	0.908028	0.157157	0.254896	0.359434	0.410671	0.400821	0.478156	0.51535	0.568084
29.17	0.1757	0.298491	0.520553	0.677841	0.666031	0.82688	0.852761	0.906523	0.159572	0.256561	0.362083	0.411797	0.394781	0.478866	0.511459	0.563396
29.27	0.175577	0.300606	0.522184	0.6732	0.670367	0.829826	0.849094	0.903147	0.15817	0.258693	0.362922	0.407488	0.401114	0.477398	0.513921	0.56436
29.37	0.175115	0.300311	0.52364	0.673776	0.667096	0.827227	0.854441	0.902003	0.158259	0.25582	0.361365	0.409869	0.398377	0.477538	0.513525	0.564995
29.47	0.17556	0.301236	0.524227	0.676675	0.669369	0.825121	0.848106	0.905176	0.15972	0.256401	0.361734	0.410117	0.399068	0.477492	0.510158	0.561308
29.57	0.178066	0.29975	0.524896	0.673466	0.667224	0.830357	0.850745	0.898196	0.159139	0.257335	0.36333	0.410899	0.398989	0.47499	0.511786	0.56362
29.67	0.175011	0.302399	0.52501	0.67605	0.671828	0.824588	0.845742	0.8981	0.158419	0.257446	0.359336	0.412591	0.399166	0.476643	0.509735	0.560684
29.77	0.177426	0.300481	0.524963	0.678625	0.668422	0.823122	0.847766	0.900619	0.158347	0.256593	0.363745	0.407599	0.400455	0.475487	0.509398	0.558699
29.87	0.177424	0.301283	0.523908	0.677069	0.667844	0.824177	0.844459	0.900272	0.159243	0.255796	0.361298	0.409768	0.396825	0.47318	0.510731	0.561456
29.97	0.178897	0.303287	0.524267	0.677907	0.671034	0.822559	0.844965	0.896984	0.160128	0.256376	0.36123	0.409296	0.394597	0.475364	0.503565	0.559899
30.07	0.178902	0.301334	0.526635	0.675969	0.669499	0.822505	0.845487	0.892847	0.158854	0.256578	0.359894	0.410447	0.399685	0.473815	0.505308	0.556161
30.17	0.177466	0.305717	0.524577	0.676904	0.666821	0.826749	0.842491	0.894965	0.161114	0.257126	0.361372	0.410383	0.399439	0.47263	0.504349	0.554216
30.27	0.177872	0.304047	0.523342	0.679983	0.668043	0.823061	0.844405	0.892754	0.159144	0.256622	0.358313	0.406982	0.397492	0.470817	0.507593	0.556712
30.37	0.178676	0.305035	0.525826	0.679607	0.668109	0.820294	0.843527	0.89088	0.158687	0.256465	0.360487	0.408789	0.399705	0.472167	0.505985	0.555792
30.47	0.178221	0.305982	0.529576	0.678121	0.669398	0.821101	0.840866	0.893447	0.159877	0.257313	0.357425	0.40754	0.398099	0.46958	0.507054	0.555342
30.57	0.179969	0.306417	0.525858	0.676783	0.668023	0.822249	0.836805	0.889431	0.15849	0.257992	0.362494	0.408366	0.397081	0.474378	0.505483	0.553121
30.67	0.180434	0.305643	0.529525	0.679184	0.67122	0.815988	0.846429	0.888145	0.160187	0.258727	0.360091	0.407314	0.396205	0.475293	0.503747	0.554228
30.77	0.17993	0.309398	0.527882	0.680273	0.675288	0.816755	0.840647	0.888302	0.160915	0.258336	0.360787	0.40677	0.39635	0.469651	0.506909	0.553156
30.87	0.179883	0.307131	0.53406	0.679179	0.668328	0.816221	0.83731	0.885265	0.160942	0.257466	0.359978	0.407046	0.397706	0.470797	0.50008	0.553097
30.97	0.182281	0.308739	0.52904	0.678591	0.673431	0.815791	0.839621	0.886797	0.16089	0.256728	0.360243	0.408044	0.397164	0.467923	0.506358	0.551607
31.07	0.182628	0.308862	0.533029	0.680246	0.674026	0.819202	0.838515	0.881997	0.160526	0.255801	0.359449	0.408084	0.396545	0.470266	0.50367	0.552543
31.17	0.182524	0.310984	0.529761	0.678165	0.672111	0.821696	0.840925	0.880691	0.157469	0.257815	0.361889	0.402282	0.397452	0.468916	0.502852	0.54898
31.27	0.183137	0.311127	0.52923	0.681899	0.66974	0.815973	0.839215	0.885192	0.161567	0.257308	0.359481	0.408202	0.397536	0.469403	0.503646	0.549066
31.37	0.18428	0.310377	0.531652	0.68123	0.669504	0.814001	0.838463	0.8847	0.160819	0.258693	0.36059	0.405583	0.395069	0.467005	0.500291	0.547099
31.47	0.182785	0.309644	0.534205	0.683849	0.671439	0.815471	0.833097	0.882951	0.160691	0.256792	0.357809	0.407769	0.397371	0.469398	0.498063	0.547932
31.57	0.18385	0.312086	0.53316	0.681365	0.668429	0.816836	0.833702	0.874044	0.161198	0.25781	0.358345	0.40576	0.397435	0.466044	0.500156	0.548889
31.67	0.18417	0.311179	0.532734	0.682922	0.671358	0.815061	0.832826	0.880194	0.160376	0.25992	0.358291	0.404933	0.396289	0.467539	0.500542	0.545003
31.77	0.18669	0.314563	0.531059	0.680253	0.672408	0.809291	0.82734	0.873874	0.161517	0.257237	0.356323	0.40393	0.394656	0.464406	0.498113	0.543818
31.87	0.183176	0.31291	0.532555	0.682341	0.670502	0.812916	0.828655	0.873682	0.160735	0.2587	0.360025	0.407867	0.393532	0.467357	0.49844	0.54367
31.97	0.186324	0.314813	0.530358	0.684904	0.673955	0.816271	0.832386	0.874976	0.158746	0.258073	0.358185	0.404682	0.394506	0.462861	0.496873	0.545008
32.07	0.185746	0.313967	0.533423	0.68376	0.670618	0.813255	0.832369	0.874093	0.161284	0.25753	0.360789	0.40285	0.395401	0.468136	0.496059	0.543675
32.17	0.186309	0.314626	0.531377	0.67927	0.67156	0.812919	0.827529	0.871833	0.160438	0.256657	0.358333	0.404073	0.39277	0.462168	0.49537	0.541762
32.27	0.186098	0.314663	0.535919	0.679297	0.668968	0.810472	0.825872	0.873006	0.16074	0.257026	0.359122	0.403487	0.394206	0.464912	0.494896	0.540985
32.37	0.187849	0.317937	0.535289	0.682636	0.671734	0.811396	0.829046	0.866555	0.161835	0.257638	0.358008	0.405088	0.395534	0.463117	0.493516	0.540478
32.47	0.185449	0.317464	0.534571	0.678502	0.666998	0.809771	0.823557	0.867591	0.159373	0.25707	0.357349	0.40465	0.39278	0.463289	0.4978	0.543336
32.57	0.18673	0.314639	0.533521	0.681837	0.671324	0.806168	0.824831	0.863156	0.159889	0.25844	0.359053	0.406401	0.392219	0.463434	0.494886	0.538831
32.67	0.187182	0.316616	0.536229	0.682223	0.67261	0.809532	0.824032	0.864647	0.16152	0.256108	0.360266	0.402877	0.392895	0.463921	0.493125	0.540719
32.77	0.187758	0.317708	0.535621	0.682334	0.671651	0.80499	0.820778	0.861209	0.160748	0.25799	0.359496	0.404045	0.39439	0.463931	0.492235	0.539121
32.87	0.190084	0.317671	0.537358	0.680327	0.671789	0.804353	0.824935	0.86367	0.16043	0.258961	0.357433	0.404245	0.394181	0.461319	0.491868	0.536502
32.97	0.188112	0.318529	0.535582	0.683748	0.670367	0.805605	0.823299	0.861831	0.163482	0.258022	0.355689	0.401677	0.393881	0.467099	0.489153	0.537399
33.07	0.188085	0.321793	0.536066	0.67927	0.665926	0.805179	0.821157	0.860097	0.161387	0.255188	0.357253	0.404409	0.392561	0.462013	0.491706	0.537589
33.17	0.188825	0.320381	0.538233	0.684336	0.672032	0.806613	0.818459	0.86021	0.161117	0.258545	0.35668	0.403138	0.392133	0.460483	0.486505	0.536748
33.27	0.188901	0.318788	0.534397	0.680748	0.668951	0.804318	0.819342	0.86264	0.163455	0.256814	0.356958	0.403522	0.392944	0.460117	0.489613	0.534763
33.37	0.19003	0.320037	0.535051	0.687122	0.670665	0.802678	0.817618	0.85964	0.162769	0.256905	0.357922	0.399998	0.389398	0.460323	0.48723	0.53464
33.47	0.18791	0.320251	0.536403	0.682703	0.671604	0.801259	0.816064	0.855321	0.161712	0.257055	0.356584	0.403133	0.390298	0.459386	0.488433	0.534465
33.57	0.19021	0.322895	0.539118	0.679916	0.674307	0.802312	0.812294	0.856814	0.163067	0.258762	0.357241	0.398515	0.393633	0.460038	0.483222	0.533283
33.67	0.189558	0.323259	0.537387	0.680652	0.668985	0.801311	0.819064	0.853457	0.163241	0.258322	0.355667	0.401466	0.389113	0.456539	0.486288	0.529692
33.77	0.192799	0.322383	0.538334	0.679998	0.670296	0.800666	0.814052	0.853565	0.162366	0.256858	0.354181	0.399811	0.389622	0.458282	0.488826	0.529852
33.87	0.191407	0.321906	0.540011	0.683667	0.671501	0.79967	0.814551	0.852392	0.161267	0.256654	0.356773	0.402322	0.388464	0.458459	0.487002	0.528632
33.97	0.191225	0.322688	0.537021	0.683123	0.669287	0.797469	0.811468	0.853137	0.162147	0.257586	0.354511	0.40063	0.388574	0.454628	0.486205	0.531986
34.07	0.191341	0.326463	0.540547	0.682504	0.669472	0.798527	0.815102	0.849262	0.160711	0.257235	0.356041	0.401943	0.387694	0.453959	0.484365	0.530125
34.17	0.190419	0.324414	0.539932	0.678205	0.670738	0.796874	0.810162	0.849276	0.162572	0.258346	0.354826	0.39972	0.390394	0.452082	0.484751	0.529419
34.27	0.191717	0.325524	0.536836	0.68119	0.665163	0.794963	0.809805	0.850754	0.163037	0.257053	0.358399	0.399621	0.388095	0.455427	0.483605	0.527498
34.37	0.192453	0.325624	0.539716	0.680143	0.664261	0.797848	0.808937	0.847894	0.161788	0.258929	0.355372	0.396515	0.388609	0.454527	0.483423	0.531893
34.47	0.193318	0.324623	0.538034	0.678802	0.669494	0.793744	0.809852	0.844564	0.16214	0.257613	0.354063	0.399577	0.391331	0.453464	0.482078	0.525947
34.57	0.193016	0.324124	0.537653	0.682147	0.670822	0.790392	0.805715	0.846529	0.161726	0.257466	0.358706	0.399196	0.389177	0.451659	0.482486	0.524928
34.67	0.19351	0.325413	0.54126	0.680898	0.667888	0.792568	0.804161	0.841962	0.160138	0.256996	0.356508	0.397447	0.387957	0.454475	0.481249	0.527614
34.77	0.192595	0.325179	0.541629	0.679911	0.667974	0.794877	0.808393	0.843588	0.160543	0.256529	0.357078	0.397376	0.387037	0.451923	0.477858	0.523807
34.87	0.194545	0.327943	0.540692	0.672568	0.665628	0.787627	0.802287	0.841151	0.161205	0.256937	0.355207	0.397115	0.387219	0.450619	0.480583	0.525091
34.97	0.195318	0.329267	0.540385	0.678869	0.666351	0.786641	0.804407	0.838219	0.161419	0.258722	0.35534	0.396584	0.384696	0.448071	0.48013	0.525856
35.07	0.194267	0.327466	0.540102	0.682272	0.665734	0.790714	0.802181	0.839582	0.161193	0.257862	0.353018	0.395266	0.385955	0.45119	0.477843	0.521399
35.17	0.19458	0.32785	0.542045	0.680364	0.669445	0.78793	0.803099	0.835996	0.161943	0.256888	0.356483	0.397251	0.388114	0.448295	0.480049	0.519137
35.27	0.195713	0.330007	0.537215	0.67548	0.670006	0.789637	0.805848	0.838758	0.160976	0.254532	0.353515	0.394944	0.387448	0.449323	0.477686	0.519245
35.37	0.196279	0.330654	0.539989	0.680071	0.663589	0.787453	0.798028	0.836382	0.161798	0.257131	0.353195	0.397868	0.387219	0.445145	0.475236	0.522715
35.47	0.194868	0.331241	0.543262	0.683064	0.668559	0.786164	0.796862	0.835745	0.162454	0.256467	0.354781	0.397096	0.387782	0.444933	0.47531	0.517307
35.57	0.195962	0.331468	0.538794	0.682349	0.666995	0.784871	0.798345	0.836264	0.161943	0.258381	0.352937	0.395595	0.383336	0.447963	0.473854	0.51758
35.67	0.19727	0.333194	0.540444	0.67562	0.664625	0.78563	0.796702	0.831673	0.161316	0.256359	0.353975	0.397477	0.381661	0.448148	0.476864	0.515824
35.67

## Sheet: secondary data n=1-3
DDDL (μM)	mitochondria ampl			mitochondria k1			mitochondria k2			mitoplasts ampl			mitoplasts k1			mitoplasts k2			mitochondria ampl avrg	mitochondria ampl SEM	mitochondria k1 avrg	mitochondria k1 SEM	mitochondria k2 avrg	mitochondria k2 SEM	mitoplasts ampl avrg	mitoplasts ampl SEM	mitoplasts k1 avrg	mitoplasts k1 SEM	mitoplasts k2 avrg	mitoplasts k2 SEM
0.1	2151343	1904791	950150	0.178197	0.160553	0.133568	0.178197	0.160553	0.07023	2311847	2225180	692537	0.273571	0.641149	0.151939	0.273571	0.222185	0.151939	1.66876e+06	366287	0.157439	0.012977	0.136327	0.0334385	1.74319e+06	525921	0.355553	0.147051	0.215898	0.0352526
0.16	2491366	2137058	1557967	0.22815	0.185587	0.124568	0.228149	0.185587	0.081126	2587686	1965966	1075857	0.416994	0.700837	0.187194	0.266145	0.22543	0.187194	2.06213e+06	272041	0.179435	0.0300593	0.164954	0.0436777	1876503	438714	0.435008	0.148549	0.226256	0.0227949
0.25	2837911	2469809	2382015	0.253286	0.22848	0.128872	0.253286	0.22848	0.128872	3038717	2003016	1517625	0.614027	0.714469	0.220773	0.236099	0.268376	0.220773	2563245	139652	0.203546	0.0380175	0.203546	0.0380175	2.18645e+06	448578	0.516423	0.150642	0.241749	0.0140292
0.4	3192215	2664883	2982925	0.299337	0.265596	0.1481	0.299337	0.265596	0.1481	3254818	2476505	1728720	0.852127	0.910863	0.241095	0.247498	0.281738	0.241095	2.94667e+06	153303	0.237678	0.0458357	0.237678	0.0458357	2486681	440576	0.668028	0.214139	0.256777	0.0126166
0.63	3145245	2853495	2913431	0.342384	0.306743	0.157036	0.342383	0.306742	0.157035	3656936	2258186	1686312	1.0915	0.863001	0.243076	0.257922	0.339916	0.243076	2.97072e+06	88959.5	0.268721	0.0567824	0.26872	0.0567824	2.53381e+06	585325	0.732525	0.253458	0.280305	0.0301122
1	3082368	2955851	3622833	0.396241	0.350584	0.24707	0.396241	0.350584	0.24707	3312636	2315497	2128986	1.02767	1.00013	0.339715	0.315918	0.362954	0.339715	3.22035e+06	204528	0.331298	0.0441284	0.331298	0.0441284	2.58571e+06	367431	0.789173	0.22487	0.339529	0.0135784
1.58	3280978	3071632	3782553	0.620597	0.391115	0.289718	0.32845	0.391115	0.289718	3513147	2410182	2356998	1.03283	1.22288	0.478778	0.367726	0.368729	0.322619	3.37839e+06	210925	0.43381	0.097873	0.336428	0.0295413	2760109	376832	0.911497	0.223208	0.353025	0.0152056
2.5	3365585	3281215	4161228	0.478876	0.428566	0.365772	0.478878	0.428564	0.365772	3719744	2754661	2685922	1.40997	1.19798	0.597932	0.361547	0.410429	0.403309	3602676	280336	0.424405	0.0327165	0.424405	0.0327171	3.05344e+06	333741	1.06863	0.243174	0.391762	0.0152465
