# Supplementary material for: Towards a molecular mechanism underlying mitochondrial protein import through the TOM and TIM23 complexes
Source: eLife. 2022 Jun 8;11:e75426. doi: 10.7554/eLife.75426 (PMC9255969; doi:10.7554/eLife.75426)
Supplement: Figure 6—figure supplement 1—source data 1. [file elife-75426-fig6-figsupp1-data1.xlsx]

## Sheet: primary data +-ATP n=1
time	native	+8pos	+8neg	-8pos	-8neg	-17neg	-13pos	native -ATP	+8pos -ATP	+8neg -ATP	-8pos -ATP	-8neg -ATP	-17neg -ATP	-13pos -ATP
0.316667	0.106296
0.416667	0.162516
0.516667	0.22448
0.616667	0.289244
0.716667	0.352394
0.816667	0.410825
0.916667	0.458904
1.01667	0.499347
1.11667	0.537842
1.21667	0.567737
1.31667	0.588616
1.41667	0.610061
1.51667	0.631202
1.61667	0.645316
1.71667	0.65752
1.81667	0.679408
1.91667	0.692235
2.01667	0.70451
2.11667	0.721466
2.21667	0.73427
2.31667	0.745077
2.41667	0.755145
2.51667	0.766511
2.61667	0.777277
2.71667	0.790321
2.81667	0.797224
2.91667	0.808673
3.01667	0.816429
3.11667	0.825434
3.21667	0.831286
3.31667	0.846234
3.41667	0.845213
3.51667	0.84876
3.61667	0.859777
3.71667	0.863257
3.81667	0.877841
3.91667	0.879673
4.01667	0.888625
4.11667	0.891309
4.21667	0.897026
4.31667	0.898907
4.41667	0.902375
4.51667	0.91173
4.61667	0.915559
4.71667	0.918062
4.81667	0.920773
4.91667	0.921317
5.01667	0.929204
5.11667	0.934091
5.21667	0.933678
5.31667	0.935037
5.41667	0.940476
5.51667	0.941599
5.61667	0.947631
5.71667	0.95042
5.81667	0.944793
5.91667	0.95131
6.01667	0.953825
6.11667	0.958611
6.21667	0.966058
6.31667	0.960735
6.41667	0.962222
6.51667	0.962751
6.61667	0.964579
6.71667	0.964493
6.81667	0.972969
6.91667	0.968513
7.01667	0.97244
7.11667	0.970856
7.21667	0.975094
7.31667	0.978543
7.41667	0.972196
7.51667	0.978476
7.61667	0.979685
7.71667	0.980161
7.81667	0.979294
7.91667	0.97375
8.01667	0.978112
8.11667	0.979204
8.21667	0.982353
8.31667	0.984264
8.41667	0.979167
8.51667	0.983532
8.61667	0.987639
8.71667	0.981734
8.81667	0.986254
8.91667	0.984441
9.01667	0.988585
9.11667	0.986471
9.21667	0.984733
9.31667	0.989786
9.41667	0.987699
9.51667	0.983998
9.61667	0.993806
9.71667	0.987492
9.81667	0.988889
9.91667	0.989013
10.0167	0.993367
10.1167	0.993859
10.2167	0.993491
10.3167	0.987038
10.4167	0.988821
10.5167	0.987338
10.6167	0.989137
10.7167	0.991344
10.8167	0.986359
10.9167	0.992545
11.0167	0.995124
11.1167	0.98595
11.2167	0.993896
11.3167	0.996603
11.4167	1
11.5167	0.995995
11.6167	0.993513
11.7167	0.991002
11.8167	0.989752
11.9167	0.993315
12.0167	0.990206
12.1167	0.994489
12.2167	0.998769
12.3167	0.99217
12.4167	0.988386
12.5167	0.997462
12.6167	0.991742
12.7167	0.992857
12.8167	0.994471
12.9167	0.991441
13.0167	0.992504
13.1167	0.993097
13.2167	0.993574
13.3167	0.993176
13.4167	0.988093
13.5167	0.991926
13.6167	0.994992
13.7167	0.993074
13.8167	0.992654
13.9167	0.989861
14.0167	0.991539
14.1167	0.994339
14.2167	0.995751
14.3167	0.997226
14.4167	0.990281
14.5167	0.993559
14.6167	0.9958
14.7167	0.992068
14.8167	0.992068
14.9167	0.995458
15.0167	0.989028
15.1167	0.995083
15.2167	0.987725
15.3167	0.989279
15.4167	0.992136
15.5167	0.985052
15.6167	0.982808
15.7167	0.994752
15.8167	0.990687
15.9167	0.993149
16.0167	0.990961
16.1167	0.990713
16.2167	0.990034
16.3167	0.99104
16.4167	0.990353
16.5167	0.984095
16.6167	0.987459
16.7167	0.984602
16.8167	0.992455
16.9167	0.983217
17.0167	0.99116
17.1167	0.986434
17.2167	0.984403
17.3167	0.984929
17.4167	0.988412
17.5167	0.990248
17.6167	0.989212
17.7167	0.983183
17.8167	0.98292
17.9167	0.986907
18.0167	0.983626
18.1167	0.982643
18.2167	0.989043
18.3167	0.984748
18.4167	0.983498
18.5167	0.986119
18.6167	0.98185
18.7167	0.979883
18.8167	0.977477
18.9167	0.984155
19.0167	0.9817
19.1167	0.978836
19.2167	0.977958
19.3167	0.984275
19.4167	0.978082
19.5167	0.980784
19.6167	0.97667
19.7167	0.983176
19.8167	0.977845
19.9167	0.981377
20.0167	0.976351
20.1167	0.976636
20.2167	0.980642
20.3167	0.975101
20.4167	0.9836
20.5167	0.97429
20.6167	0.973588
20.7167	0.98232
20.8167	0.971396
20.9167	0.972826
21.0167	0.973956
21.1167	0.973648
21.2167	0.972042
21.3167	0.972346
21.4167	0.97345
21.5167	0.975589
21.6167	0.976287
21.7167	0.973172
21.8167	0.970326
21.9167	0.97521
22.0167	0.970431
22.1167	0.969377
22.2167	0.976528
22.3167	0.97286
22.4167	0.970751
22.5167	0.972579
22.6167	0.972019
22.7167	0.969902
22.8167	0.968851
22.9167	0.970473
23.0167	0.969245
23.1167	0.967564
23.2167	0.967894
23.3167	0.969204
23.4167	0.970202
23.5167	0.971854
23.6167	0.969129
23.7167	0.965026
23.8167	0.967087
23.9167	0.963427
24.0167	0.960086
24.1167	0.962128
24.2167	0.967894
24.3167	0.962815
24.4167	0.963498
24.5167	0.96244
24.6167	0.966482
24.7167	0.966862
24.8167	0.963825
24.9167	0.956771
25.0167	0.960923
25.1167	0.959178
25.2167	0.958483
25.3167	0.963164
25.4167	0.958964
25.5167	0.960623
25.6167	0.958254
25.7167	0.955048
25.8167	0.958656
25.9167	0.959042
26.0167	0.951944
26.1167	0.958374
26.2167	0.959913
26.3167	0.950623
26.4167	0.95503
26.5167	0.954343
26.6167	0.954673
26.7167	0.95866
26.8167	0.951043
26.9167	0.960079
27.0167	0.954966
27.1167	0.954955
27.2167	0.952327
27.3167	0.95634
27.4167	0.947064
27.5167	0.94774
27.6167	0.952241
27.7167	0.950026
27.8167	0.95456
27.9167	0.953971
28.0167	0.95441
28.1167	0.943093
28.2167	0.94664
28.3167	0.942635
28.4167	0.95238
28.5167	0.950818
28.6167	0.945131
28.7167	0.949324
28.8167	0.948885
28.9167	0.947079
29.0167	0.946516
29.1167	0.945897
29.2167	0.941276
29.3167	0.943967
29.4167	0.944624
29.5167	0.947057
29.6167	0.94322
29.7167	0.944114
29.8167	0.939917
29.9167	0.945105
30.0167	0.940026
30.1167	0.941527
30.2167	0.943299
0.287778		0.10458
0.387778		0.14627
0.487778		0.183958
0.587778		0.21957
0.687778		0.255411
0.787778		0.287476
0.887778		0.315663
0.987778		0.34412
1.08778		0.378787
1.18778		0.402875
1.28778		0.429943
1.38778		0.449744
1.48778		0.47351
1.58778		0.497402
1.68778		0.516543
1.78778		0.541093
1.88778		0.560143
1.98778		0.580222
2.08778		0.593315
2.18778		0.614288
2.28778		0.628451
2.38778		0.645771
2.48778		0.661765
2.58778		0.6738
2.68778		0.691327
2.78778		0.708958
2.88778		0.717824
2.98778		0.730497
3.08778		0.740103
3.18778		0.752397
3.28778		0.762915
3.38778		0.774304
3.48778		0.780366
3.58778		0.794413
3.68778		0.804728
3.78778		0.80736
3.88778		0.82266
3.98778		0.828441
4.08778		0.834368
4.18778		0.84456
4.28778		0.848974
4.38778		0.84885
4.48778		0.85876
4.58778		0.861835
4.68778		0.8709
4.78778		0.872
4.88778		0.878591
4.98778		0.882075
5.08778		0.885209
5.18778		0.892128
5.28778		0.893374
5.38778		0.893554
5.48778		0.896565
5.58778		0.898899
5.68778		0.905769
5.78778		0.912601
5.88778		0.916463
5.98778		0.911966
6.08778		0.917139
6.18778		0.921141
6.28778		0.92715
6.38778		0.926895
6.48778		0.927905
6.58778		0.930307
6.68778		0.928412
6.78778		0.931918
6.88778		0.936403
6.98778		0.938491
7.08778		0.936801
7.18778		0.937766
7.28778		0.944812
7.38778		0.940048
7.48778		0.943787
7.58778		0.94664
7.68778		0.946843
7.78778		0.942413
7.88778		0.948164
7.98778		0.95033
8.08778		0.950011
8.18778		0.949136
8.28778		0.955923
8.38778		0.954403
8.48778		0.957346
8.58778		0.96194
8.68778		0.963648
8.78778		0.958307
8.88778		0.957736
8.98778		0.968476
9.08778		0.964568
9.18778		0.961704
9.28778		0.966888
9.38778		0.966066
9.48778		0.968821
9.58778		0.970781
9.68778		0.965949
9.78778		0.969662
9.88778		0.970225
9.98778		0.97131
10.0878		0.970454
10.1878		0.968675
10.2878		0.969643
10.3878		0.963412
10.4878		0.972102
10.5878		0.975431
10.6878		0.976475
10.7878		0.977312
10.8878		0.973814
10.9878		0.974373
11.0878		0.974163
11.1878		0.975634
11.2878		0.977624
11.3878		0.980751
11.4878		0.974197
11.5878		0.979163
11.6878		0.976261
11.7878		0.976445
11.8878		0.975019
11.9878		0.981528
12.0878		0.976569
12.1878		0.975773
12.2878		0.979534
12.3878		0.977185
12.4878		0.975334
12.5878		0.974673
12.6878		0.979069
12.7878		0.980803
12.8878		0.977778
12.9878		0.975225
13.0878		0.97259
13.1878		0.97497
13.2878		0.98063
13.3878		0.974962
13.4878		0.979542
13.5878		0.973322
13.6878		0.974035
13.7878		0.975172
13.8878		0.976351
13.9878		0.980799
14.0878		0.980169
14.1878		0.974861
14.2878		0.977691
14.3878		0.98009
14.4878		0.980214
14.5878		0.979392
14.6878		0.975529
14.7878		0.972586
14.8878		0.976111
14.9878		0.973236
15.0878		0.980439
15.1878		0.97292
15.2878		0.974553
15.3878		0.974013
15.4878		0.97786
15.5878		0.976453
15.6878		0.974414
15.7878		0.973532
15.8878		0.966888
15.9878		0.971231
16.0878		0.970653
16.1878		0.970278
16.2878		0.973232
16.3878		0.971888
16.4878		0.973438
16.5878		0.97518
16.6878		0.968986
16.7878		0.967365
16.8878		0.965075
16.9878		0.972718
17.0878		0.968603
17.1878		0.96881
17.2878		0.971483
17.3878		0.961651
17.4878		0.970469
17.5878		0.969377
17.6878		0.967252
17.7878		0.962064
17.8878		0.964617
17.9878		0.96664
18.0878		0.962335
18.1878		0.966929
18.2878		0.963603
18.3878		0.966708
18.4878		0.964287
18.5878		0.960882
18.6878		0.962237
18.7878		0.961235
18.8878		0.955037
18.9878		0.959103
19.0878		0.96247
19.1878		0.958622
19.2878		0.958431
19.3878		0.95622
19.4878		0.957684
19.5878		0.957537
19.6878		0.957766
19.7878		0.95661
19.8878		0.958157
19.9878		0.954219
20.0878		0.95688
20.1878		0.95518
20.2878		0.956021
20.3878		0.948735
20.4878		0.950649
20.5878		0.945259
20.6878		0.945559
20.7878		0.954271
20.8878		0.947905
20.9878		0.950454
21.0878		0.946077
21.1878		0.94551
21.2878		0.948397
21.3878		0.947518
21.4878		0.944279
21.5878		0.946186
21.6878		0.94631
21.7878		0.944553
21.8878		0.94512
21.9878		0.947042
22.0878		0.943153
22.1878		0.94036
22.2878		0.946167
22.3878		0.941967
22.4878		0.944016
22.5878		0.937477
22.6878		0.940529
22.7878		0.940071
22.8878		0.942237
22.9878		0.940671
23.0878		0.939981
23.1878		0.93747
23.2878		0.934977
23.3878		0.928885
23.4878		0.933734
23.5878		0.931313
23.6878		0.931298
23.7878		0.929853
23.8878		0.927867
23.9878		0.93471
24.0878		0.931054
24.1878		0.928085
24.2878		0.933907
24.3878		0.927165
24.4878		0.93179
24.5878		0.92974
24.6878		0.930855
24.7878		0.929196
24.8878		0.929763
24.9878		0.926268
25.0878		0.922229
25.1878		0.922248
25.2878		0.920968
25.3878		0.925544
25.4878		0.923288
25.5878		0.920059
25.6878		0.921347
25.7878		0.916741
25.8878		0.921204
25.9878		0.919038
26.0878		0.920525
26.1878		0.913926
26.2878		0.911054
26.3878		0.91792
26.4878		0.913813
26.5878		0.919872
26.6878		0.915469
26.7878		0.913997
26.8878		0.917529
26.9878		0.921163
27.0878		0.914166
27.1878		0.911869
27.2878		0.913727
27.3878		0.915258
27.4878		0.911174
27.5878		0.91355
27.6878		0.9095
27.7878		0.909016
27.8878		0.902375
27.9878		0.906812
28.0878		0.904455
28.1878		0.907439
28.2878		0.905164
28.3878		0.904744
28.4878		0.904286
28.5878		0.902304
28.6878		0.900315
28.7878		0.901861
28.8878		0.90206
28.9878		0.898385
29.0878		0.900093
29.1878		0.897503
29.2878		0.892
29.3878		0.898539
29.4878		0.896955
29.5878		0.899481
29.6878		0.889665
29.7878		0.895292
29.8878		0.895217
29.9878		0.895513
30.0878		0.890498
30.1878		0.889935
0.258889			0.026749
0.358889			0.036502
0.458889			0.049186
0.558889			0.064584
0.658889			0.082587
0.758889			0.106247
0.858889			0.128244
0.958889			0.152148
1.05889			0.181593
1.15889			0.21115
1.25889			0.242348
1.35889			0.26915
1.45889			0.295824
1.55889			0.329207
1.65889			0.356365
1.75889			0.386771
1.85889			0.411606
1.95889			0.442777
2.05889			0.467158
2.15889			0.491464
2.25889			0.515409
2.35889			0.537891
2.45889			0.564359
2.55889			0.584805
2.65889			0.607261
2.75889			0.626596
2.85889			0.644975
2.95889			0.666041
3.05889			0.680838
3.15889			0.700159
3.25889			0.717704
3.35889			0.730276
3.45889			0.744428
3.55889			0.762806
3.65889			0.780392
3.75889			0.792994
3.85889			0.799976
3.95889			0.817476
4.05889			0.826241
4.15889			0.837668
4.25889			0.849316
4.35889			0.863171
4.45889			0.872923
4.55889			0.878141
4.65889			0.894316
4.75889			0.898351
4.85889			0.913258
4.95889			0.919526
5.05889			0.929316
5.15889			0.933802
5.25889			0.949842
5.35889			0.95206
5.45889			0.966385
5.55889			0.970826
5.65889			0.979579
5.75889			0.985435
5.85889			0.997601
5.95889			0.998923
6.05889			1.0096
6.15889			1.01659
6.25889			1.02315
6.35889			1.03018
6.45889			1.03758
6.55889			1.04439
6.65889			1.04979
6.75889			1.0492
6.85889			1.06061
6.95889			1.0619
7.05889			1.0654
7.15889			1.07503
7.25889			1.0861
7.35889			1.08823
7.45889			1.09124
7.55889			1.09713
7.65889			1.10411
7.75889			1.10485
7.85889			1.10884
7.95889			1.11238
8.05889			1.1239
8.15889			1.12301
8.25889			1.1339
8.35889			1.13068
8.45889			1.1375
8.55889			1.13824
8.65889			1.1374
8.75889			1.14663
8.85889			1.14469
8.95889			1.14555
9.05889			1.15814
9.15889			1.15753
9.25889			1.16141
9.35889			1.16011
9.45889			1.1679
9.55889			1.17256
9.65889			1.1692
9.75889			1.17568
9.85889			1.1761
9.95889			1.17616
10.0589			1.18351
10.1589			1.18118
10.2589			1.18866
10.3589			1.19244
10.4589			1.19236
10.5589			1.19307
10.6589			1.19924
10.7589			1.19958
10.8589			1.2028
10.9589			1.20188
11.0589			1.20509
11.1589			1.20885
11.2589			1.20675
11.3589			1.20956
11.4589			1.20758
11.5589			1.21677
11.6589			1.21581
11.7589			1.21515
11.8589			1.22219
11.9589			1.22316
12.0589			1.2227
12.1589			1.21954
12.2589			1.22769
12.3589			1.22583
12.4589			1.22595
12.5589			1.22426
12.6589			1.23116
12.7589			1.23227
12.8589			1.22549
12.9589			1.22678
13.0589			1.23141
13.1589			1.22713
13.2589			1.23719
13.3589			1.23377
13.4589			1.23212
13.5589			1.24435
13.6589			1.23943
13.7589			1.23942
13.8589			1.24182
13.9589			1.23883
14.0589			1.24011
14.1589			1.24497
14.2589			1.24283
14.3589			1.24207
14.4589			1.2486
14.5589			1.23849
14.6589			1.24723
14.7589			1.25287
14.8589			1.24282
14.9589			1.24333
15.0589			1.2477
15.1589			1.24484
15.2589			1.24669
15.3589			1.25298
15.4589			1.25061
15.5589			1.25043
15.6589			1.24964
15.7589			1.24971
15.8589			1.2486
15.9589			1.24749
16.0589			1.25347
16.1589			1.25308
16.2589			1.24941
16.3589			1.25239
16.4589			1.25029
16.5589			1.25161
16.6589			1.24538
16.7589			1.25112
16.8589			1.24904
16.9589			1.24883
17.0589			1.24969
17.1589			1.25026
17.2589			1.24877
17.3589			1.24817
17.4589			1.25069
17.5589			1.24828
17.6589			1.24928
17.7589			1.25207
17.8589			1.25279
17.9589			1.25145
18.0589			1.24987
18.1589			1.25294
18.2589			1.24885
18.3589			1.25809
18.4589			1.24809
18.5589			1.25019
18.6589			1.25116
18.7589			1.2407
18.8589			1.25127
18.9589			1.2513
19.0589			1.25131
19.1589			1.24886
19.2589			1.24992
19.3589			1.25526
19.4589			1.24953
19.5589			1.24717
19.6589			1.24937
19.7589			1.24469
19.8589			1.25336
19.9589			1.25059
20.0589			1.24617
20.1589			1.24229
20.2589			1.24642
20.3589			1.24253
20.4589			1.25035
20.5589			1.24374
20.6589			1.24419
20.7589			1.24222
20.8589			1.23902
20.9589			1.23861
21.0589			1.23914
21.1589			1.24579
21.2589			1.23121
21.3589			1.24266
21.4589			1.23776
21.5589			1.23061
21.6589			1.23627
21.7589			1.23999
21.8589			1.23303
21.9589			1.23269
22.0589			1.23277
22.1589			1.23786
22.2589			1.23604
22.3589			1.2358
22.4589			1.23579
22.5589			1.23305
22.6589			1.23439
22.7589			1.2394
22.8589			1.23029
22.9589			1.2286
23.0589			1.22379
23.1589			1.23167
23.2589			1.22907
23.3589			1.22873
23.4589			1.22642
23.5589			1.22302
23.6589			1.21755
23.7589			1.22308
23.8589			1.22168
23.9589			1.22523
24.0589			1.21987
24.1589			1.22112
24.2589			1.22037
24.3589			1.22551
24.4589			1.21816
24.5589			1.21581
24.6589			1.22383
24.7589			1.21681
24.8589			1.21933
24.9589			1.21326
25.0589			1.21637
25.1589			1.20854
25.2589			1.21363
25.3589			1.21238
25.4589			1.21008
25.5589			1.21252
25.6589			1.20658
25.7589			1.20822
25.8589			1.20638
25.9589			1.20955
26.0589			1.20465
26.1589			1.2029
26.2589			1.20377
26.3589			1.20204
26.4589			1.20439
26.5589			1.20114
26.6589			1.19958
26.7589			1.20453
26.8589			1.20114
26.9589			1.20356
27.0589			1.20013
27.1589			1.20334
27.2589			1.19953
27.3589			1.20386
27.4589			1.19369
27.5589			1.19711
27.6589			1.19353
27.7589			1.19594
27.8589			1.19223
27.9589			1.19101
28.0589			1.1919
28.1589			1.19892
28.2589			1.18812
28.3589			1.18653
28.4589			1.19447
28.5589			1.18714
28.6589			1.18906
28.7589			1.19034
28.8589			1.18727
28.9589			1.18337
29.0589			1.18487
29.1589			1.18217
29.2589			1.17542
29.3589			1.18287
29.4589			1.17576
29.5589			1.17343
29.6589			1.18044
29.7589			1.17679
29.8589			1.17574
29.9589			1.1779
30.0589			1.16516
30.1589			1.17045
0.23				0.040282
0.33				0.063503
0.43				0.096829
0.53				0.135782
0.63				0.178507
0.73				0.225441
0.83				0.27501
0.93				0.32153
1.03				0.368978
1.13				0.413299
1.23				0.454977
1.33				0.497275
1.43				0.534527
1.53				0.570905
1.63				0.604993
1.73				0.634592
1.83				0.667073
1.93				0.693316
2.03				0.717952
2.13				0.740839
2.23				0.766473
2.33				0.783812
2.43				0.806838
2.53				0.828606
2.63				0.842784
2.73				0.860539
2.83				0.882274
2.93				0.891347
3.03				0.910363
3.13				0.932702
3.23				0.941475
3.33				0.95491
3.43				0.964808
3.53				0.982023
3.63				0.990867
3.73				1.0055
3.83				1.01396
3.93				1.02766
4.03				1.03994
4.13				1.04696
4.23				1.05499
4.33				1.06847
4.43				1.06947
4.53				1.08023
4.63				1.0893
4.73				1.09802
4.83				1.11285
4.93				1.11589
5.03				1.12526
5.13				1.12878
5.23				1.1364
5.33				1.14097
5.43				1.14662
5.53				1.15538
5.63				1.16507
5.73				1.16461
5.83				1.17578
5.93				1.17868
6.03				1.1858
6.13				1.18517
6.23				1.18924
6.33				1.20336
6.43				1.20444
6.53				1.20628
6.63				1.21718
6.73				1.22078
6.83				1.21784
6.93				1.21685
7.03				1.22916
7.13				1.23299
7.23				1.23624
7.33				1.24216
7.43				1.24815
7.53				1.24764
7.63				1.24519
7.73				1.25967
7.83				1.25684
7.93				1.26125
8.03				1.26141
8.13				1.25747
8.23				1.263
8.33				1.26648
8.43				1.266
8.53				1.27374
8.63				1.26556
8.73				1.27635
8.83				1.27573
8.93				1.27168
9.03				1.28058
9.13				1.28091
9.23				1.28064
9.33				1.28646
9.43				1.28268
9.53				1.28947
9.63				1.28899
9.73				1.28677
9.83				1.29032
9.93				1.30012
10.03				1.30086
10.13				1.29664
10.23				1.30476
10.33				1.3064
10.43				1.29845
10.53				1.30615
10.63				1.30574
10.73				1.30982
10.83				1.31419
10.93				1.3061
11.03				1.30789
11.13				1.30786
11.23				1.31598
11.33				1.31938
11.43				1.31653
11.53				1.31548
11.63				1.31303
11.73				1.32011
11.83				1.3198
11.93				1.32004
12.03				1.31444
12.13				1.32386
12.23				1.32058
12.33				1.31631
12.43				1.3175
12.53				1.32594
12.63				1.32179
12.73				1.32448
12.83				1.32215
12.93				1.32382
13.03				1.32435
13.13				1.32902
13.23				1.328
13.33				1.32571
13.43				1.31801
13.53				1.32548
13.63				1.32287
13.73				1.33261
13.83				1.3219
13.93				1.32459
14.03				1.3254
14.13				1.32643
14.23				1.32006
14.33				1.32293
14.43				1.32504
14.53				1.32461
14.63				1.32762
14.73				1.32875
14.83				1.32366
14.93				1.32417
15.03				1.3227
15.13				1.32318
15.23				1.32422
15.33				1.31824
15.43				1.32078
15.53				1.31627
15.63				1.31865
15.73				1.31808
15.83				1.31619
15.93				1.3199
16.03				1.31689
16.13				1.30995
16.23				1.31709
16.33				1.31681
16.43				1.31602
16.53				1.30762
16.63				1.31069
16.73				1.31462
16.83				1.31199
16.93				1.31003
17.03				1.31176
17.13				1.31162
17.23				1.31485
17.33				1.31051
17.43				1.30495
17.53				1.3144
17.63				1.31241
17.73				1.31032
17.83				1.30577
17.93				1.30456
18.03				1.30509
18.13				1.30133
18.23				1.30442
18.33				1.29884
18.43				1.31042
18.53				1.3021
18.63				1.30607
18.73				1.29956
18.83				1.29401
18.93				1.30261
19.03				1.29624
19.13				1.28975
19.23				1.29151
19.33				1.29447
19.43				1.29388
19.53				1.29601
19.63				1.29045
19.73				1.28715
19.83				1.29213
19.93				1.2911
20.03				1.29129
20.13				1.28721
20.23				1.28843
20.33				1.27817
20.43				1.2909
20.53				1.29058
20.63				1.28994
20.73				1.28209
20.83				1.27872
20.93				1.28333
21.03				1.2848
21.13				1.27535
21.23				1.28134
21.33				1.2823
21.43				1.27794
21.53				1.27387
21.63				1.27145
21.73				1.27464
21.83				1.27407
21.93				1.27054
22.03				1.27763
22.13				1.27312
22.23				1.26725
22.33				1.26642
22.43				1.26908
22.53				1.26403
22.63				1.26903
22.73				1.26453
22.83				1.26894
22.93				1.26565
23.03				1.26462
23.13				1.26586
23.23				1.2611
23.33				1.26155
23.43				1.2637
23.53				1.25972
23.63				1.25746
23.73				1.25404
23.83				1.25733
23.93				1.25398
24.03				1.25363
24.13				1.25358
24.23				1.25115
24.33				1.24855
24.43				1.25215
24.53				1.25114
24.63				1.24575
24.73				1.24402
24.83				1.24544
24.93				1.24222
25.03				1.23793
25.13				1.24078
25.23				1.24167
25.33				1.245
25.43				1.23731
25.53				1.23797
25.63				1.23766
25.73				1.23151
25.83				1.23419
25.93				1.23049
26.03				1.23376
26.13				1.23147
26.23				1.24191
26.33				1.23613
26.43				1.22461
26.53				1.23172
26.63				1.22549
26.73				1.22687
26.83				1.22446
26.93				1.22277
27.03				1.22291
27.13				1.22017
27.23				1.2187
27.33				1.22555
27.43				1.21315
27.53				1.21766
27.63				1.21553
27.73				1.21417
27.83				1.21325
27.93				1.22008
28.03				1.21398
28.13				1.21005
28.23				1.20999
28.33				1.21204
28.43				1.21199
28.53				1.20353
28.63				1.21065
28.73				1.20278
28.83				1.20456
28.93				1.19728
29.03				1.19818
29.13				1.20314
29.23				1.19709
29.33				1.20127
29.43				1.19924
29.53				1.20136
29.63				1.19765
29.73				1.18775
29.83				1.18997
29.93				1.19846
30.03				1.19384
30.13				1.18804
0.201111					0.057328
0.301111					0.103499
0.401111					0.155121
0.501111					0.201116
0.601111					0.241916
0.701111					0.277877
0.801111					0.302559
0.901111					0.329965
1.00111					0.350168
1.10111					0.371534
1.20111					0.387507
1.30111					0.411182
1.40111					0.427026
1.50111					0.442012
1.60111					0.458112
1.70111					0.474955
1.80111					0.490968
1.90111					0.504711
2.00111					0.517571
2.10111					0.531333
2.20111					0.545961
2.30111					0.554328
2.40111					0.566476
2.50111					0.576194
2.60111					0.586303
2.70111					0.600252
2.80111					0.607077
2.90111					0.619644
3.00111					0.629963
3.10111					0.637081
3.20111					0.645617
3.30111					0.654033
3.40111					0.657009
3.50111					0.667753
3.60111					0.675298
3.70111					0.682055
3.80111					0.69332
3.90111					0.690613
4.00111					0.706946
4.10111					0.705095
4.20111					0.715647
4.30111					0.715512
4.40111					0.718913
4.50111					0.727963
4.60111					0.731447
4.70111					0.735933
4.80111					0.73912
4.90111					0.74778
5.00111					0.743782
5.10111					0.747325
5.20111					0.752224
5.30111					0.75683
5.40111					0.757761
5.50111					0.762652
5.60111					0.765494
5.70111					0.774289
5.80111					0.773591
5.90111					0.778632
6.00111					0.775712
6.10111					0.773842
6.20111					0.780103
6.30111					0.780794
6.40111					0.783305
6.50111					0.784766
6.60111					0.784608
6.70111					0.791583
6.80111					0.792217
6.90111					0.790558
7.00111					0.794357
7.10111					0.799518
7.20111					0.804642
7.30111					0.800723
7.40111					0.801954
7.50111					0.809405
7.60111					0.803786
7.70111					0.805933
7.80111					0.807972
7.90111					0.806121
8.00111					0.808959
8.10111					0.804646
8.20111					0.811849
8.30111					0.81156
8.40111					0.810877
8.50111					0.81546
8.60111					0.813073
8.70111					0.813407
8.80111					0.812953
8.90111					0.811613
9.00111					0.814522
9.10111					0.815599
9.20111					0.814203
9.30111					0.81927
9.40111					0.812585
9.50111					0.817101
9.60111					0.819315
9.70111					0.81403
9.80111					0.814826
9.90111					0.814939
10.0011					0.818711
10.1011					0.823129
10.2011					0.812236
10.3011					0.821962
10.4011					0.816579
10.5011					0.815059
10.6011					0.816571
10.7011					0.816883
10.8011					0.81385
10.9011					0.817029
11.0011					0.81992
11.1011					0.818433
11.2011					0.813313
11.3011					0.818715
11.4011					0.818193
11.5011					0.817987
11.6011					0.816305
11.7011					0.817814
11.8011					0.811485
11.9011					0.819848
12.0011					0.814184
12.1011					0.817713
12.2011					0.810982
12.3011					0.813523
12.4011					0.814984
12.5011					0.81915
12.6011					0.80665
12.7011					0.813437
12.8011					0.809222
12.9011					0.814165
13.0011					0.808032
13.1011					0.812243
13.2011					0.815667
13.3011					0.81409
13.4011					0.813794
13.5011					0.810809
13.6011					0.809788
13.7011					0.81608
13.8011					0.81278
13.9011					0.807844
14.0011					0.812086
14.1011					0.807213
14.2011					0.813827
14.3011					0.812724
14.4011					0.808095
14.5011					0.806354
14.6011					0.810487
14.7011					0.810772
14.8011					0.807149
14.9011					0.806106
15.0011					0.80439
15.1011					0.806436
15.2011					0.802352
15.3011					0.801068
15.4011					0.808749
15.5011					0.807521
15.6011					0.803512
15.7011					0.80183
15.8011					0.802326
15.9011					0.803565
16.0011					0.805956
16.1011					0.807803
16.2011					0.804086
16.3011					0.803925
16.4011					0.805366
16.5011					0.805074
16.6011					0.802258
16.7011					0.803366
16.8011					0.799732
16.9011					0.803144
17.0011					0.801331
17.1011					0.803715
17.2011					0.80251
17.3011					0.802585
17.4011					0.797547
17.5011					0.798835
17.6011					0.800584
17.7011					0.800708
17.8011					0.796361
17.9011					0.794826
18.0011					0.797502
18.1011					0.795021
18.2011					0.796305
18.3011					0.8001
18.4011					0.795633
18.5011					0.798929
18.6011					0.797754
18.7011					0.798722
18.8011					0.794942
18.9011					0.794657
19.0011					0.795411
19.1011					0.790614
19.2011					0.797007
19.3011					0.799875
19.4011					0.795712
19.5011					0.793163
19.6011					0.788929
19.7011					0.790205
19.8011					0.793039
19.9011					0.791857
20.0011					0.786162
20.1011					0.791432
20.2011					0.788407
20.3011					0.792014
20.4011					0.787457
20.5011					0.795355
20.6011					0.792881
20.7011					0.786695
20.8011					0.793959
20.9011					0.791087
21.0011					0.79064
21.1011					0.790888
21.2011					0.787393
21.3011					0.791519
21.4011					0.787239
21.5011					0.784206
21.6011					0.786181
21.7011					0.789698
21.8011					0.787956
21.9011					0.786241
22.0011					0.785077
22.1011					0.78888
22.2011					0.786391
22.3011					0.781838
22.4011					0.786485
22.5011					0.786766
22.6011					0.782844
22.7011					0.782956
22.8011					0.78088
22.9011					0.783046
23.0011					0.78251
23.1011					0.781263
23.2011					0.780689
23.3011					0.785892
23.4011					0.779413
23.5011					0.776263
23.6011					0.786849
23.7011					0.780096
23.8011					0.785426
23.9011					0.77647
24.0011					0.779142
24.1011					0.781402
24.2011					0.779251
24.3011					0.77317
24.4011					0.779458
24.5011					0.776684
24.6011					0.778981
24.7011					0.773959
24.8011					0.777438
24.9011					0.778857
25.0011					0.776218
25.1011					0.774612
25.2011					0.772705
25.3011					0.774375
25.4011					0.771995
25.5011					0.768767
25.6011					0.767434
25.7011					0.766102
25.8011					0.771312
25.9011					0.770419
26.0011					0.773838
26.1011					0.770347
26.2011					0.765648
26.3011					0.766151
26.4011					0.768816
26.5011					0.766609
26.6011					0.77278
26.7011					0.770873
26.8011					0.768549
26.9011					0.768561
27.0011					0.764161
27.1011					0.763335
27.2011					0.770381
27.3011					0.767626
27.4011					0.760858
27.5011					0.762911
27.6011					0.764416
27.7011					0.765231
27.8011					0.762397
27.9011					0.763422
28.0011					0.761894
28.1011					0.76564
28.2011					0.758801
28.3011					0.761289
28.4011					0.76284
28.5011					0.763842
28.6011					0.760299
28.7011					0.759664
28.8011					0.762423
28.9011					0.758061
29.0011					0.759251
29.1011					0.750223
29.2011					0.756387
29.3011					0.751203
29.4011					0.758729
29.5011					0.75394
29.6011					0.755771
29.7011					0.758838
29.8011					0.756199
29.9011					0.755456
30.0011					0.756654
30.1011					0.757821
0.172222						0.062241
0.272222						0.099918
0.372222						0.135035
0.472222						0.171094
0.572222						0.199532
0.672222						0.233512
0.772222						0.26302
0.872222						0.284143
0.972222						0.308929
1.07222						0.328141
1.17222						0.345292
1.27222						0.361256
1.37222						0.371617
1.47222						0.384057
1.57222						0.389256
1.67222						0.398907
1.77222						0.411692
1.87222						0.416981
1.97222						0.422984
2.07222						0.432774
2.17222						0.439658
2.27222						0.444391
2.37222						0.456982
2.47222						0.461126
2.57222						0.467789
2.67222						0.475953
2.77222						0.489576
2.87222						0.487541
2.97222						0.500199
3.07222						0.505045
3.17222						0.51271
3.27222						0.518589
3.37222						0.529156
3.47222						0.532684
3.57222						0.537819
3.67222						0.544891
3.77222						0.547677
3.87222						0.556543
3.97222						0.556479
4.07222						0.569967
4.17222						0.573315
4.27222						0.575853
4.37222						0.586679
4.47222						0.588353
4.57222						0.593124
4.67222						0.600245
4.77222						0.601401
4.87222						0.610722
4.97222						0.618177
5.07222						0.618255
5.17222						0.6252
5.27222						0.626551
5.37222						0.628657
5.47222						0.635609
5.57222						0.640399
5.67222						0.643286
5.77222						0.649885
5.87222						0.652024
5.97222						0.663184
6.07222						0.657588
6.17222						0.664427
6.27222						0.66404
6.37222						0.668428
6.47222						0.671968
6.57222						0.674611
6.67222						0.676488
6.77222						0.682865
6.87222						0.683016
6.97222						0.68603
7.07222						0.686563
7.17222						0.691308
7.27222						0.697828
7.37222						0.699258
7.47222						0.703797
7.57222						0.701807
7.67222						0.705692
7.77222						0.708722
7.87222						0.705722
7.97222						0.713102
8.07222						0.70859
8.17222						0.714183
8.27222						0.713106
8.37222						0.71841
8.47222						0.717577
8.57222						0.718902
8.67222						0.724923
8.77222						0.726203
8.87222						0.722246
8.97222						0.722948
9.07222						0.723767
9.17222						0.726391
9.27222						0.727367
9.37222						0.730366
9.47222						0.727798
9.57222						0.735178
9.67222						0.737322
9.77222						0.736871
9.87222						0.7349
9.97222						0.735261
10.0722						0.737213
10.1722						0.738012
10.2722						0.737171
10.3722						0.739518
10.4722						0.7368
10.5722						0.740899
10.6722						0.74231
10.7722						0.737314
10.8722						0.745043
10.9722						0.741811
11.0722						0.742217
11.1722						0.742982
11.2722						0.748091
11.3722						0.746826
11.4722						0.746252
11.5722						0.747757
11.6722						0.747731
11.7722						0.744837
11.8722						0.75067
11.9722						0.746372
12.0722						0.753557
12.1722						0.751143
12.2722						0.749135
12.3722						0.755186
12.4722						0.755032
12.5722						0.757348
12.6722						0.757145
12.7722						0.75707
12.8722						0.757051
12.9722						0.759169
13.0722						0.756909
13.1722						0.756
13.2722						0.750257
13.3722						0.756563
13.4722						0.756297
13.5722						0.759413
13.6722						0.757536
13.7722						0.752149
13.8722						0.753684
13.9722						0.757322
14.0722						0.754454
14.1722						0.762971
14.2722						0.758174
14.3722						0.757262
14.4722						0.756631
14.5722						0.755013
14.6722						0.753459
14.7722						0.757851
14.8722						0.754563
14.9722						0.758801
15.0722						0.75909
15.1722						0.755482
15.2722						0.75784
15.3722						0.755024
15.4722						0.758339
15.5722						0.758677
15.6722						0.754082
15.7722						0.754
15.8722						0.761087
15.9722						0.75894
16.0722						0.757851
16.1722						0.75448
16.2722						0.756173
16.3722						0.756552
16.4722						0.756256
16.5722						0.755835
16.6722						0.757476
16.7722						0.763928
16.8722						0.761556
16.9722						0.759998
17.0722						0.759754
17.1722						0.757509
17.2722						0.755918
17.3722						0.758193
17.4722						0.761541
17.5722						0.756871
17.6722						0.75552
17.7722						0.754657
17.8722						0.756143
17.9722						0.757926
18.0722						0.756064
18.1722						0.754807
18.2722						0.758054
18.3722						0.757573
18.4722						0.755847
18.5722						0.75472
18.6722						0.761995
18.7722						0.752104
18.8722						0.752693
18.9722						0.751635
19.0722						0.745516
19.1722						0.753677
19.2722						0.754518
19.3722						0.751999
19.4722						0.75228
19.5722						0.747153
19.6722						0.753538
19.7722						0.753373
19.8722						0.744135
19.9722						0.746376
20.0722						0.75171
20.1722						0.745726
20.2722						0.74891
20.3722						0.749878
20.4722						0.748609
20.5722						0.748737
20.6722						0.749574
20.7722						0.74674
20.8722						0.752502
20.9722						0.745584
21.0722						0.744108
21.1722						0.748234
21.2722						0.746248
21.3722						0.74454
21.4722						0.75683
21.5722						0.745392
21.6722						0.748208
21.7722						0.744116
21.8722						0.743831
21.9722						0.743129
22.0722						0.744953
22.1722						0.751447
22.2722						0.745467
22.3722						0.742453
22.4722						0.748271
22.5722						0.746695
22.6722						0.744536
22.7722						0.740843
22.8722						0.741886
22.9722						0.743572
23.0722						0.741034
23.1722						0.745527
23.2722						0.739859
23.3722						0.742798
23.4722						0.740813
23.5722						0.74109
23.6722						0.739382
23.7722						0.735291
23.8722						0.737813
23.9722						0.736575
24.0722						0.737014
24.1722						0.738996
24.2722						0.735966
24.3722						0.736879
24.4722						0.73558
24.5722						0.73692
24.6722						0.736976
24.7722						0.729641
24.8722						0.733087
24.9722						0.733969
25.0722						0.734518
25.1722						0.732892
25.2722						0.733939
25.3722						0.733309
25.4722						0.73234
25.5722						0.733406
25.6722						0.73037
25.7722						0.732378
25.8722						0.730242
25.9722						0.728999
26.0722						0.729975
26.1722						0.729964
26.2722						0.728478
26.3722						0.732599
26.4722						0.728534
26.5722						0.730861
26.6722						0.72698
26.7722						0.727404
26.8722						0.725332
26.9722						0.724889
27.0722						0.72781
27.1722						0.72784
27.2722						0.725745
27.3722						0.724213
27.4722						0.722794
27.5722						0.723981
27.6722						0.718121
27.7722						0.72213
27.8722						0.721657
27.9722						0.726004
28.0722						0.723279
28.1722						0.724281
28.2722						0.722017
28.3722						0.717457
28.4722						0.721976
28.5722						0.718481
28.6722						0.721038
28.7722						0.716259
28.8722						0.719683
28.9722						0.714461
29.0722						0.715369
29.1722						0.712941
29.2722						0.716987
29.3722						0.716248
29.4722						0.715114
29.5722						0.715948
29.6722						0.719052
29.7722						0.710805
29.8722						0.713571
29.9722						0.713902
30.0722						0.714367
0.143333							0.02119
0.243333							0.040466
0.343333							0.073525
0.443333							0.11663
0.543333							0.172073
0.643333							0.235219
0.743333							0.30108
0.843333							0.364091
0.943333							0.428254
1.04333							0.492616
1.14333							0.545725
1.24333							0.599239
1.34333							0.641897
1.44333							0.686871
1.54333							0.728707
1.64333							0.765197
1.74333							0.796534
1.84333							0.818242
1.94333							0.853389
2.04333							0.883787
2.14333							0.901302
2.24333							0.926249
2.34333							0.950886
2.44333							0.97319
2.54333							0.987958
2.64333							1.01016
2.74333							1.02528
2.84333							1.04035
2.94333							1.05801
3.04333							1.07541
3.14333							1.09128
3.24333							1.10335
3.34333							1.11599
3.44333							1.12978
3.54333							1.14337
3.64333							1.15989
3.74333							1.17056
3.84333							1.17962
3.94333							1.18737
4.04333							1.20751
4.14333							1.21403
4.24333							1.21844
4.34333							1.23328
4.44333							1.23921
4.54333							1.24429
4.64333							1.25714
4.74333							1.26632
4.84333							1.27418
4.94333							1.27758
5.04333							1.28618
5.14333							1.30209
5.24333							1.29853
5.34333							1.30498
5.44333							1.3129
5.54333							1.31479
5.64333							1.32298
5.74333							1.32676
5.84333							1.32987
5.94333							1.34077
6.04333							1.33823
6.14333							1.34929
6.24333							1.34669
6.34333							1.35469
6.44333							1.35562
6.54333							1.36526
6.64333							1.36432
6.74333							1.36616
6.84333							1.37215
6.94333							1.37267
7.04333							1.38286
7.14333							1.38007
7.24333							1.38638
7.34333							1.38899
7.44333							1.39362
7.54333							1.38993
7.64333							1.39245
7.74333							1.39294
7.84333							1.40354
7.94333							1.39843
8.04333							1.3993
8.14333							1.4034
8.24333							1.41001
8.34333							1.40502
8.44333							1.40899
8.54333							1.41028
8.64333							1.41054
8.74333							1.41782
8.84333							1.41281
8.94333							1.4094
9.04333							1.41868
9.14333							1.41827
9.24333							1.41858
9.34333							1.41801
9.44333							1.42254
9.54333							1.41474
9.64333							1.41774
9.74333							1.42559
9.84333							1.41938
9.94333							1.42478
10.0433							1.42855
10.1433							1.42293
10.2433							1.42216
10.3433							1.42384
10.4433							1.43379
10.5433							1.42004
10.6433							1.42386
10.7433							1.43413
10.8433							1.43188
10.9433							1.42857
11.0433							1.43218
11.1433							1.43227
11.2433							1.4342
11.3433							1.42899
11.4433							1.42929
11.5433							1.42587
11.6433							1.43428
11.7433							1.42876
11.8433							1.42728
11.9433							1.42849
12.0433							1.42441
12.1433							1.42748
12.2433							1.42792
12.3433							1.4274
12.4433							1.42503
12.5433							1.42465
12.6433							1.42067
12.7433							1.43226
12.8433							1.42441
12.9433							1.42311
13.0433							1.43137
13.1433							1.42633
13.2433							1.4249
13.3433							1.42207
13.4433							1.41379
13.5433							1.42359
13.6433							1.42623
13.7433							1.41712
13.8433							1.41848
13.9433							1.41364
14.0433							1.41787
14.1433							1.41979
14.2433							1.41216
14.3433							1.40559
14.4433							1.40765
14.5433							1.4076
14.6433							1.41338
14.7433							1.41154
14.8433							1.40657
14.9433							1.41102
15.0433							1.4067
15.1433							1.39936
15.2433							1.40213
15.3433							1.40709
15.4433							1.40283
15.5433							1.40217
15.6433							1.38982
15.7433							1.39629
15.8433							1.40505
15.9433							1.39887
16.0433							1.39389
16.1433							1.39798
16.2433							1.38869
16.3433							1.39475
16.4433							1.38575
16.5433							1.39348
16.6433							1.38852
16.7433							1.39385
16.8433							1.38492
16.9433							1.38036
17.0433							1.38507
17.1433							1.37582
17.2433							1.3737
17.3433							1.38006
17.4433							1.37811
17.5433							1.37959
17.6433							1.38309
17.7433							1.37888
17.8433							1.37274
17.9433							1.37329
18.0433							1.37042
18.1433							1.37052
18.2433							1.37014
18.3433							1.37216
18.4433							1.36888
18.5433							1.36951
18.6433							1.36806
18.7433							1.3613
18.8433							1.36226
18.9433							1.36401
19.0433							1.35355
19.1433							1.35956
19.2433							1.35222
19.3433							1.35449
19.4433							1.35189
19.5433							1.3528
19.6433							1.35097
19.7433							1.35102
19.8433							1.35239
19.9433							1.34724
[truncated: 2,801 more rows]

## Sheet: primary data +-ATP n=2
time	native	+8pos	+8neg	-8pos	-8neg	-17neg	-13pos	native -ATP	+8pos -ATP	+8neg -ATP	-8pos -ATP	-8neg -ATP	-17neg -ATP	-13pos -ATP
0.316667	0.120828
0.416667	0.179749
0.516667	0.245579
0.616667	0.31126
0.716667	0.367856
0.816667	0.418108
0.916667	0.456303
1.01667	0.493678
1.11667	0.518957
1.21667	0.54394
1.31667	0.564348
1.41667	0.581229
1.51667	0.602361
1.61667	0.614168
1.71667	0.631559
1.81667	0.643748
1.91667	0.657805
2.01667	0.67216
2.11667	0.685953
2.21667	0.699267
2.31667	0.712527
2.41667	0.723618
2.51667	0.728435
2.61667	0.743263
2.71667	0.753347
2.81667	0.763178
2.91667	0.769441
3.01667	0.779576
3.11667	0.787664
3.21667	0.798349
3.31667	0.806278
3.41667	0.809839
3.51667	0.821018
3.61667	0.824416
3.71667	0.830585
3.81667	0.84176
3.91667	0.844534
4.01667	0.851392
4.11667	0.856182
4.21667	0.857855
4.31667	0.863361
4.41667	0.867162
4.51667	0.874141
4.61667	0.87882
4.71667	0.881979
4.81667	0.882675
4.91667	0.891682
5.01667	0.890313
5.11667	0.893492
5.21667	0.896084
5.31667	0.905016
5.41667	0.905002
5.51667	0.906252
5.61667	0.910303
5.71667	0.913745
5.81667	0.916988
5.91667	0.920458
6.01667	0.919374
6.11667	0.925441
6.21667	0.925215
6.31667	0.929775
6.41667	0.927897
6.51667	0.931904
6.61667	0.932995
6.71667	0.939022
6.81667	0.934775
6.91667	0.938876
7.01667	0.944893
7.11667	0.943049
7.21667	0.944403
7.31667	0.946437
7.41667	0.942951
7.51667	0.952815
7.61667	0.948994
7.71667	0.9524
7.81667	0.951744
7.91667	0.954866
8.01667	0.957704
8.11667	0.959491
8.21667	0.963764
8.31667	0.962477
8.41667	0.962879
8.51667	0.958102
8.61667	0.958589
8.71667	0.964606
8.81667	0.967031
8.91667	0.965234
9.01667	0.968183
9.11667	0.968497
9.21667	0.969312
9.31667	0.972666
9.41667	0.970284
9.51667	0.972389
9.61667	0.974497
9.71667	0.973261
9.81667	0.973116
9.91667	0.975825
10.0167	0.978686
10.1167	0.97818
10.2167	0.973281
10.3167	0.980838
10.4167	0.979382
10.5167	0.985105
10.6167	0.977693
10.7167	0.983386
10.8167	0.982977
10.9167	0.980524
11.0167	0.979778
11.1167	0.977463
11.2167	0.983203
11.3167	0.980169
11.4167	0.985912
11.5167	0.985558
11.6167	0.98446
11.7167	0.981821
11.8167	0.98019
11.9167	0.988821
12.0167	0.988379
12.1167	0.988956
12.2167	0.98848
12.3167	0.986058
12.4167	0.990943
12.5167	0.989828
12.6167	0.99246
12.7167	0.989362
12.8167	0.989811
12.9167	0.991041
13.0167	0.992355
13.1167	0.986159
13.2167	0.989777
13.3167	0.990595
13.4167	0.990666
13.5167	0.993939
13.6167	0.992385
13.7167	0.991814
13.8167	0.996598
13.9167	0.990659
14.0167	0.991311
14.1167	0.988568
14.2167	0.99226
14.3167	0.997682
14.4167	0.992034
14.5167	0.994281
14.6167	0.992081
14.7167	0.991801
14.8167	0.993591
14.9167	0.993676
15.0167	0.9955
15.1167	0.992281
15.2167	0.995743
15.3167	0.991443
15.4167	0.991024
15.5167	0.990237
15.6167	0.993203
15.7167	0.99351
15.8167	0.997689
15.9167	0.996635
16.0167	0.995003
16.1167	1
16.2167	0.992348
16.3167	0.992777
16.4167	0.997274
16.5167	0.994358
16.6167	0.994615
16.7167	0.996676
16.8167	0.999003
16.9167	0.998321
17.0167	0.994909
17.1167	0.997787
17.2167	0.994081
17.3167	0.994801
17.4167	0.997017
17.5167	0.993071
17.6167	0.99828
17.7167	0.995487
17.8167	0.992389
17.9167	0.998753
18.0167	0.996348
18.1167	0.992277
18.2167	0.992304
18.3167	0.995487
18.4167	0.995824
18.5167	0.991649
18.6167	0.992574
18.7167	0.992585
18.8167	0.98926
18.9167	0.993652
19.0167	0.991091
19.1167	0.992855
19.2167	0.994801
19.3167	0.990173
19.4167	0.994166
19.5167	0.990456
19.6167	0.992784
19.7167	0.995193
19.8167	0.996672
19.9167	0.988889
20.0167	0.991733
20.1167	0.992547
20.2167	0.990122
20.3167	0.994906
20.4167	0.995703
20.5167	0.99127
20.6167	0.990389
20.7167	0.988284
20.8167	0.990227
20.9167	0.987382
21.0167	0.989271
21.1167	0.992754
21.2167	0.990659
21.3167	0.989075
21.4167	0.984639
21.5167	0.987287
21.6167	0.984946
21.7167	0.989267
21.8167	0.98676
21.9167	0.986737
22.0167	0.986173
22.1167	0.990426
22.2167	0.984926
22.3167	0.98846
22.4167	0.986406
22.5167	0.993041
22.6167	0.982575
22.7167	0.983271
22.8167	0.985538
22.9167	0.980619
23.0167	0.989328
23.1167	0.985879
23.2167	0.983757
23.3167	0.978538
23.4167	0.98221
23.5167	0.985858
23.6167	0.977284
23.7167	0.985135
23.8167	0.986267
23.9167	0.98247
24.0167	0.983098
24.1167	0.983244
24.2167	0.983754
24.3167	0.983129
24.4167	0.980886
24.5167	0.987696
24.6167	0.98419
24.7167	0.980659
24.8167	0.975517
24.9167	0.983085
25.0167	0.978534
25.1167	0.981615
25.2167	0.984815
25.3167	0.977876
25.4167	0.97543
25.5167	0.976886
25.6167	0.980953
25.7167	0.980963
25.8167	0.977528
25.9167	0.975889
26.0167	0.974896
26.1167	0.9747
26.2167	0.973845
26.3167	0.978034
26.4167	0.96971
26.5167	0.980784
26.6167	0.97494
26.7167	0.976403
26.8167	0.978909
26.9167	0.972075
27.0167	0.97795
27.1167	0.974028
27.2167	0.97646
27.3167	0.980132
27.4167	0.974879
27.5167	0.971967
27.6167	0.973335
27.7167	0.972443
27.8167	0.970045
27.9167	0.97322
28.0167	0.971143
28.1167	0.970528
28.2167	0.973193
28.3167	0.971082
28.4167	0.97296
28.5167	0.96973
28.6167	0.970936
28.7167	0.967457
28.8167	0.971791
28.9167	0.971055
29.0167	0.964065
29.1167	0.965119
29.2167	0.966714
29.3167	0.960484
29.4167	0.960048
29.5167	0.966727
29.6167	0.965876
29.7167	0.969207
29.8167	0.971578
29.9167	0.958427
30.0167	0.967318
30.1167	0.963805
30.2167	0.963065
0.302222		0.114751
0.402222		0.14725
0.502222		0.181705
0.602222		0.208525
0.702222		0.238298
0.802222		0.26744
0.902222		0.295736
1.00222		0.323742
1.10222		0.350063
1.20222		0.376474
1.30222		0.399589
1.40222		0.421524
1.50222		0.443858
1.60222		0.470918
1.70222		0.489468
1.80222		0.508542
1.90222		0.529795
2.00222		0.547757
2.10222		0.564848
2.20222		0.584233
2.30222		0.596344
2.40222		0.615279
2.50222		0.627141
2.60222		0.64613
2.70222		0.657491
2.80222		0.670086
2.90222		0.68369
3.00222		0.69118
3.10222		0.701889
3.20222		0.713517
3.30222		0.717696
3.40222		0.727334
3.50222		0.735378
3.60222		0.743553
3.70222		0.750884
3.80222		0.756181
3.90222		0.761475
4.00222		0.77232
4.10222		0.775009
4.20222		0.779488
4.30222		0.787799
4.40222		0.792056
4.50222		0.792738
4.60222		0.799123
4.70222		0.805329
4.80222		0.808765
4.90222		0.809633
5.00222		0.813954
5.10222		0.817504
5.20222		0.825801
5.30222		0.818406
5.40222		0.827693
5.50222		0.828034
5.60222		0.833061
5.70222		0.836031
5.80222		0.829116
5.90222		0.83743
6.00222		0.835463
6.10222		0.842929
6.20222		0.844848
6.30222		0.846656
6.40222		0.849547
6.50222		0.844061
6.60222		0.853058
6.70222		0.862483
6.80222		0.857716
6.90222		0.863828
7.00222		0.865088
7.10222		0.868601
7.20222		0.869976
7.30222		0.867513
7.40222		0.877263
7.50222		0.874054
7.60222		0.874158
7.70222		0.87856
7.80222		0.879891
7.90222		0.878956
8.00222		0.881628
8.10222		0.883814
8.20222		0.889486
8.30222		0.89083
8.40222		0.888682
8.50222		0.893503
8.60222		0.897783
8.70222		0.900604
8.80222		0.903813
8.90222		0.90261
9.00222		0.911374
9.10222		0.906472
9.20222		0.906945
9.30222		0.904516
9.40222		0.913333
9.50222		0.911489
9.60222		0.915448
9.70222		0.916799
9.80222		0.916992
9.90222		0.91411
10.0022		0.923154
10.1022		0.918164
10.2022		0.913978
10.3022		0.918353
10.4022		0.919211
10.5022		0.924772
10.6022		0.923884
10.7022		0.919512
10.8022		0.925681
10.9022		0.927005
11.0022		0.928924
11.1022		0.932714
11.2022		0.924894
11.3022		0.925971
11.4022		0.927468
11.5022		0.928029
11.6022		0.929769
11.7022		0.926745
11.8022		0.929052
11.9022		0.929596
12.0022		0.925204
12.1022		0.933535
12.2022		0.934674
12.3022		0.931096
12.4022		0.924188
12.5022		0.934758
12.6022		0.932944
12.7022		0.934552
12.8022		0.939579
12.9022		0.939924
13.0022		0.937147
13.1022		0.938853
13.2022		0.934015
13.3022		0.934684
13.4022		0.940545
13.5022		0.939461
13.6022		0.940593
13.7022		0.938123
13.8022		0.940741
13.9022		0.938184
14.0022		0.936721
14.1022		0.937299
14.2022		0.939417
14.3022		0.941653
14.4022		0.941336
14.5022		0.942484
14.6022		0.94644
14.7022		0.942886
14.8022		0.945275
14.9022		0.942349
15.0022		0.941998
15.1022		0.946846
15.2022		0.939883
15.3022		0.944934
15.4022		0.943755
15.5022		0.940062
15.6022		0.945386
15.7022		0.942738
15.8022		0.939623
15.9022		0.948038
16.0022		0.947809
16.1022		0.945234
16.2022		0.946366
16.3022		0.942586
16.4022		0.944843
16.5022		0.944991
16.6022		0.947302
16.7022		0.943397
16.8022		0.94392
16.9022		0.947863
17.0022		0.944059
17.1022		0.9484
17.2022		0.946393
17.3022		0.942579
17.4022		0.941376
17.5022		0.944143
17.6022		0.942768
17.7022		0.941866
17.8022		0.941724
17.9022		0.944839
18.0022		0.940849
18.1022		0.948025
18.2022		0.947278
18.3022		0.942488
18.4022		0.945015
18.5022		0.943765
18.6022		0.947407
18.7022		0.94666
18.8022		0.942484
18.9022		0.939143
19.0022		0.941762
19.1022		0.947386
19.2022		0.94111
19.3022		0.94241
19.4022		0.947116
19.5022		0.944748
19.6022		0.937616
19.7022		0.939917
19.8022		0.936751
19.9022		0.937768
20.0022		0.940555
20.1022		0.947552
20.2022		0.936103
20.3022		0.937849
20.4022		0.939853
20.5022		0.938772
20.6022		0.945376
20.7022		0.937613
20.8022		0.937633
20.9022		0.937251
21.0022		0.936339
21.1022		0.936387
21.2022		0.933789
21.3022		0.934333
21.4022		0.936846
21.5022		0.937799
21.6022		0.934458
21.7022		0.935218
21.8022		0.940468
21.9022		0.937164
22.0022		0.932829
22.1022		0.937032
22.2022		0.93241
22.3022		0.932235
22.4022		0.928346
22.5022		0.928829
22.6022		0.931042
22.7022		0.933542
22.8022		0.925137
22.9022		0.928495
23.0022		0.929532
23.1022		0.927106
23.2022		0.924701
23.3022		0.924096
23.4022		0.927819
23.5022		0.927796
23.6022		0.924262
23.7022		0.929525
23.8022		0.92791
23.9022		0.928215
24.0022		0.925904
24.1022		0.922603
24.2022		0.922968
24.3022		0.920772
24.4022		0.9256
24.5022		0.924211
24.6022		0.924167
24.7022		0.919157
24.8022		0.917863
24.9022		0.922384
25.0022		0.921019
25.1022		0.918076
25.2022		0.919826
25.3022		0.923042
25.4022		0.912482
25.5022		0.918705
25.6022		0.922613
25.7022		0.915573
25.8022		0.917809
25.9022		0.918634
26.0022		0.912103
26.1022		0.913891
26.2022		0.915918
26.3022		0.92035
26.4022		0.90934
26.5022		0.91283
26.6022		0.91163
26.7022		0.912928
26.8022		0.905036
26.9022		0.906421
27.0022		0.911043
27.1022		0.904249
27.2022		0.910664
27.3022		0.907681
27.4022		0.908924
27.5022		0.911455
27.6022		0.907999
27.7022		0.908174
27.8022		0.906813
27.9022		0.90609
28.0022		0.900739
28.1022		0.908674
28.2022		0.902969
28.3022		0.903712
28.4022		0.900533
28.5022		0.903296
28.6022		0.900364
28.7022		0.90132
28.8022		0.899418
28.9022		0.898982
29.0022		0.896644
29.1022		0.89203
29.2022		0.900908
29.3022		0.894421
29.4022		0.893945
29.5022		0.894486
29.6022		0.896621
29.7022		0.890864
29.8022		0.894607
29.9022		0.892611
30.0022		0.892783
30.1022		0.894357
30.2022		0.89478
0.287778			0.041002
0.387778			0.052671
0.487778			0.071198
0.587778			0.091734
0.687778			0.117021
0.787778			0.143193
0.887778			0.171057
0.987778			0.203495
1.08778			0.23313
1.18778			0.265386
1.28778			0.298385
1.38778			0.327296
1.48778			0.357687
1.58778			0.391373
1.68778			0.416564
1.78778			0.44655
1.88778			0.471367
1.98778			0.499052
2.08778			0.526673
2.18778			0.54396
2.28778			0.56727
2.38778			0.59156
2.48778			0.610796
2.58778			0.629458
2.68778			0.644505
2.78778			0.664261
2.88778			0.681883
2.98778			0.695473
3.08778			0.716794
3.18778			0.727848
3.28778			0.743523
3.38778			0.757114
3.48778			0.763384
3.58778			0.780938
3.68778			0.791549
3.78778			0.805451
3.88778			0.812758
3.98778			0.826565
4.08778			0.839169
4.18778			0.844926
4.28778			0.852912
4.38778			0.853662
4.48778			0.86727
4.58778			0.884246
4.68778			0.892759
4.78778			0.901789
4.88778			0.907438
4.98778			0.919042
5.08778			0.919799
5.18778			0.922924
5.28778			0.934529
5.38778			0.943795
5.48778			0.948721
5.58778			0.957538
5.68778			0.964622
5.78778			0.965866
5.88778			0.976156
5.98778			0.980389
6.08778			0.989024
6.18778			0.989733
6.28778			0.998314
6.38778			1.00287
6.48778			1.00829
6.58778			1.01046
6.68778			1.02017
6.78778			1.02372
6.88778			1.02863
6.98778			1.03195
7.08778			1.03603
7.18778			1.04323
7.28778			1.0475
7.38778			1.04823
7.48778			1.05986
7.58778			1.06158
7.68778			1.06589
7.78778			1.06798
7.88778			1.07779
7.98778			1.08741
8.08778			1.08765
8.18778			1.09129
8.28778			1.09462
8.38778			1.10456
8.48778			1.10177
8.58778			1.10481
8.68778			1.11106
8.78778			1.11771
8.88778			1.12055
8.98778			1.12777
9.08778			1.12916
9.18778			1.13339
9.28778			1.13535
9.38778			1.147
9.48778			1.15033
9.58778			1.14874
9.68778			1.14817
9.78778			1.15221
9.88778			1.14969
9.98778			1.15566
10.0878			1.1598
10.1878			1.16316
10.2878			1.16174
10.3878			1.16699
10.4878			1.17001
10.5878			1.17311
10.6878			1.17503
10.7878			1.17434
10.8878			1.17855
10.9878			1.17759
11.0878			1.18327
11.1878			1.18023
11.2878			1.18044
11.3878			1.18452
11.4878			1.18108
11.5878			1.1833
11.6878			1.18894
11.7878			1.1848
11.8878			1.18875
11.9878			1.18769
12.0878			1.18795
12.1878			1.19557
12.2878			1.19907
12.3878			1.19504
12.4878			1.1981
12.5878			1.20218
12.6878			1.20224
12.7878			1.20597
12.8878			1.19948
12.9878			1.20708
13.0878			1.2125
13.1878			1.20276
13.2878			1.20595
13.3878			1.20656
13.4878			1.20469
13.5878			1.2007
13.6878			1.20845
13.7878			1.20715
13.8878			1.2115
13.9878			1.2063
14.0878			1.21096
14.1878			1.21463
14.2878			1.21552
14.3878			1.21504
14.4878			1.2166
14.5878			1.21506
14.6878			1.21725
14.7878			1.21689
14.8878			1.21771
14.9878			1.21661
15.0878			1.2171
15.1878			1.21481
15.2878			1.22095
15.3878			1.21774
15.4878			1.22087
15.5878			1.22463
15.6878			1.22286
15.7878			1.22363
15.8878			1.22276
15.9878			1.21694
16.0878			1.22802
16.1878			1.22113
16.2878			1.22642
16.3878			1.22329
16.4878			1.23025
16.5878			1.22446
16.6878			1.22347
16.7878			1.2306
16.8878			1.22629
16.9878			1.22124
17.0878			1.22208
17.1878			1.22612
17.2878			1.22391
17.3878			1.22477
17.4878			1.22544
17.5878			1.22558
17.6878			1.22157
17.7878			1.22505
17.8878			1.21971
17.9878			1.22976
18.0878			1.22761
18.1878			1.22813
18.2878			1.22228
18.3878			1.21914
18.4878			1.21704
18.5878			1.22238
18.6878			1.21961
18.7878			1.22736
18.8878			1.21911
18.9878			1.21739
19.0878			1.22494
19.1878			1.21896
19.2878			1.2271
19.3878			1.21984
19.4878			1.22002
19.5878			1.22076
19.6878			1.21577
19.7878			1.21728
19.8878			1.21806
19.9878			1.21992
20.0878			1.21301
20.1878			1.21681
20.2878			1.2109
20.3878			1.21138
20.4878			1.21924
20.5878			1.21434
20.6878			1.21137
20.7878			1.2079
20.8878			1.20957
20.9878			1.20693
21.0878			1.2072
21.1878			1.21271
21.2878			1.21047
21.3878			1.21124
21.4878			1.2121
21.5878			1.20332
21.6878			1.20492
21.7878			1.20229
21.8878			1.20638
21.9878			1.20395
22.0878			1.20422
22.1878			1.205
22.2878			1.20029
22.3878			1.20353
22.4878			1.20168
22.5878			1.1943
22.6878			1.1946
22.7878			1.19742
22.8878			1.19803
22.9878			1.19697
23.0878			1.19675
23.1878			1.20184
23.2878			1.2011
23.3878			1.2011
23.4878			1.19874
23.5878			1.19627
23.6878			1.20275
23.7878			1.1968
23.8878			1.20217
23.9878			1.19445
24.0878			1.19765
24.1878			1.19831
24.2878			1.198
24.3878			1.19186
24.4878			1.19632
24.5878			1.19874
24.6878			1.18998
24.7878			1.19157
24.8878			1.18415
24.9878			1.19011
25.0878			1.1847
25.1878			1.18791
25.2878			1.19036
25.3878			1.18417
25.4878			1.18191
25.5878			1.18224
25.6878			1.18241
25.7878			1.18181
25.8878			1.17806
25.9878			1.17874
26.0878			1.17888
26.1878			1.17637
26.2878			1.17773
26.3878			1.17647
26.4878			1.18276
26.5878			1.17895
26.6878			1.18119
26.7878			1.17889
26.8878			1.17389
26.9878			1.17554
27.0878			1.17718
27.1878			1.17803
27.2878			1.17467
27.3878			1.17562
27.4878			1.17502
27.5878			1.17218
27.6878			1.16682
27.7878			1.17398
27.8878			1.16682
27.9878			1.1649
28.0878			1.16678
28.1878			1.16121
28.2878			1.16494
28.3878			1.16657
28.4878			1.16691
28.5878			1.16875
28.6878			1.16824
28.7878			1.16366
28.8878			1.16036
28.9878			1.16242
29.0878			1.15672
29.1878			1.16088
29.2878			1.16225
29.3878			1.16372
29.4878			1.15495
29.5878			1.15513
29.6878			1.15595
29.7878			1.1596
29.8878			1.15155
29.9878			1.16043
30.0878			1.15691
30.1878			1.15651
0.273333				0.066907
0.373333				0.099842
0.473333				0.138804
0.573333				0.18858
0.673333				0.23068
0.773333				0.280085
0.873333				0.324857
0.973333				0.367505
1.07333				0.41098
1.17333				0.449503
1.27333				0.48607
1.37333				0.521079
1.47333				0.547267
1.57333				0.575997
1.67333				0.60279
1.77333				0.629465
1.87333				0.649025
1.97333				0.67268
2.07333				0.70046
2.17333				0.711645
2.27333				0.728969
2.37333				0.749992
2.47333				0.766539
2.57333				0.784296
2.67333				0.797566
2.77333				0.808998
2.87333				0.825747
2.97333				0.833176
3.07333				0.844652
3.17333				0.854446
3.27333				0.870307
3.37333				0.878131
3.47333				0.886618
3.57333				0.900955
3.67333				0.905249
3.77333				0.914928
3.87333				0.921394
3.97333				0.933904
4.07333				0.940221
4.17333				0.953626
4.27333				0.957021
4.37333				0.968913
4.47333				0.976051
4.57333				0.975301
4.67333				0.981919
4.77333				0.990537
4.87333				1.00075
4.97333				1.00571
5.07333				1.00751
5.17333				1.01212
5.27333				1.01445
5.37333				1.02216
5.47333				1.02368
5.57333				1.03117
5.67333				1.03393
5.77333				1.04164
5.87333				1.04031
5.97333				1.04818
6.07333				1.04645
6.17333				1.05386
6.27333				1.06062
6.37333				1.06173
6.47333				1.06564
6.57333				1.06753
6.67333				1.06925
6.77333				1.06862
6.87333				1.0811
6.97333				1.08108
7.07333				1.08416
7.17333				1.07788
7.27333				1.08476
7.37333				1.08278
7.47333				1.08869
7.57333				1.09505
7.67333				1.09392
7.77333				1.10513
7.87333				1.10381
7.97333				1.10819
8.07333				1.1127
8.17333				1.11026
8.27333				1.10966
8.37333				1.1118
8.47333				1.1177
8.57333				1.1117
8.67333				1.11593
8.77333				1.12908
8.87333				1.12706
8.97333				1.12371
9.07333				1.12769
9.17333				1.12661
9.27333				1.13387
9.37333				1.12454
9.47333				1.13603
9.57333				1.13674
9.67333				1.13848
9.77333				1.13922
9.87333				1.13861
9.97333				1.13925
10.0733				1.14558
10.1733				1.1464
10.2733				1.14799
10.3733				1.1468
10.4733				1.14389
10.5733				1.14873
10.6733				1.1555
10.7733				1.15191
10.8733				1.15525
10.9733				1.15277
11.0733				1.15599
11.1733				1.15493
11.2733				1.16086
11.3733				1.15606
11.4733				1.15695
11.5733				1.15936
11.6733				1.16074
11.7733				1.16149
11.8733				1.16101
11.9733				1.16223
12.0733				1.16637
12.1733				1.16101
12.2733				1.17084
12.3733				1.16831
12.4733				1.16481
12.5733				1.16709
12.6733				1.16574
12.7733				1.16945
12.8733				1.16432
12.9733				1.16606
13.0733				1.16486
13.1733				1.17476
13.2733				1.17241
13.3733				1.16672
13.4733				1.1722
13.5733				1.1675
13.6733				1.16426
13.7733				1.1675
13.8733				1.17372
13.9733				1.16813
14.0733				1.16416
14.1733				1.17099
14.2733				1.16052
14.3733				1.17094
14.4733				1.16566
14.5733				1.1744
14.6733				1.17306
14.7733				1.1692
14.8733				1.16675
14.9733				1.16682
15.0733				1.16624
15.1733				1.17301
15.2733				1.17583
15.3733				1.16747
15.4733				1.17057
15.5733				1.16701
15.6733				1.17371
15.7733				1.17087
15.8733				1.17091
15.9733				1.16869
16.0733				1.16833
16.1733				1.16861
16.2733				1.16641
16.3733				1.17263
16.4733				1.16897
16.5733				1.16608
16.6733				1.17239
16.7733				1.1668
16.8733				1.17313
16.9733				1.16733
17.0733				1.16779
17.1733				1.16435
17.2733				1.16981
17.3733				1.16574
17.4733				1.16349
17.5733				1.16481
17.6733				1.17012
17.7733				1.1717
17.8733				1.16585
17.9733				1.16821
18.0733				1.16334
18.1733				1.16548
18.2733				1.16123
18.3733				1.16016
18.4733				1.16065
18.5733				1.16041
18.6733				1.16669
18.7733				1.16081
18.8733				1.163
18.9733				1.16369
19.0733				1.15738
19.1733				1.15692
19.2733				1.15603
19.3733				1.15504
19.4733				1.15856
19.5733				1.15954
19.6733				1.15411
19.7733				1.16013
19.8733				1.16399
19.9733				1.15782
20.0733				1.16115
20.1733				1.1525
20.2733				1.1561
20.3733				1.16061
20.4733				1.1575
20.5733				1.15268
20.6733				1.15571
20.7733				1.15753
20.8733				1.14957
20.9733				1.15413
21.0733				1.15368
21.1733				1.15279
21.2733				1.15336
21.3733				1.16008
21.4733				1.14996
21.5733				1.14837
21.6733				1.1478
21.7733				1.14573
21.8733				1.14596
21.9733				1.14626
22.0733				1.15162
22.1733				1.14832
22.2733				1.14211
22.3733				1.14423
22.4733				1.14596
22.5733				1.14658
22.6733				1.14335
22.7733				1.14679
22.8733				1.13818
22.9733				1.14539
23.0733				1.14494
23.1733				1.14481
23.2733				1.14118
23.3733				1.13955
23.4733				1.14066
23.5733				1.13869
23.6733				1.13724
23.7733				1.13574
23.8733				1.14257
23.9733				1.13911
24.0733				1.14071
24.1733				1.13601
24.2733				1.13644
24.3733				1.13918
24.4733				1.13528
24.5733				1.13211
24.6733				1.13257
24.7733				1.12748
24.8733				1.13123
24.9733				1.12889
25.0733				1.1268
25.1733				1.12995
25.2733				1.12685
25.3733				1.12284
25.4733				1.12105
25.5733				1.1259
25.6733				1.12666
25.7733				1.12808
25.8733				1.12192
25.9733				1.12204
26.0733				1.12001
26.1733				1.12308
26.2733				1.12054
26.3733				1.12653
26.4733				1.1163
26.5733				1.1151
26.6733				1.12388
26.7733				1.11422
26.8733				1.11622
26.9733				1.11356
27.0733				1.10936
27.1733				1.11428
27.2733				1.1154
27.3733				1.12089
27.4733				1.11657
27.5733				1.11568
27.6733				1.10982
27.7733				1.11068
27.8733				1.11021
27.9733				1.11321
28.0733				1.11129
28.1733				1.11635
28.2733				1.10924
28.3733				1.1112
28.4733				1.10783
28.5733				1.10797
28.6733				1.1056
28.7733				1.10739
28.8733				1.10692
28.9733				1.10448
29.0733				1.1017
29.1733				1.10886
29.2733				1.10149
29.3733				1.09472
29.4733				1.09708
29.5733				1.10154
29.6733				1.09394
29.7733				1.09332
29.8733				1.09963
29.9733				1.09767
30.0733				1.09309
30.1733				1.09652
0.258889					0.103508
0.358889					0.145885
0.458889					0.183421
0.558889					0.212515
0.658889					0.238944
0.758889					0.260585
0.858889					0.281378
0.958889					0.301115
1.05889					0.322698
1.15889					0.339735
1.25889					0.351549
1.35889					0.368333
1.45889					0.386883
1.55889					0.399301
1.65889					0.416254
1.75889					0.429047
1.85889					0.444523
1.95889					0.453337
2.05889					0.462851
2.15889					0.476137
2.25889					0.486722
2.35889					0.497384
2.45889					0.510447
2.55889					0.51389
2.65889					0.526974
2.75889					0.539207
2.85889					0.543372
2.95889					0.551271
3.05889					0.56273
3.15889					0.567085
3.25889					0.570294
3.35889					0.57724
3.45889					0.585256
3.55889					0.589726
3.65889					0.59728
3.75889					0.598479
3.85889					0.603874
3.95889					0.611989
4.05889					0.619303
4.15889					0.621232
4.25889					0.625806
4.35889					0.624745
4.45889					0.634998
4.55889					0.633191
4.65889					0.637022
4.75889					0.647093
4.85889					0.647187
4.95889					0.646758
5.05889					0.650806
5.15889					0.648681
5.25889					0.657832
5.35889					0.656843
5.45889					0.663744
5.55889					0.662711
5.65889					0.664255
5.75889					0.668913
5.85889					0.668795
5.95889					0.671741
6.05889					0.672366
6.15889					0.67994
6.25889					0.681741
6.35889					0.677011
6.45889					0.683842
6.55889					0.685909
6.65889					0.688538
6.75889					0.689332
6.85889					0.686619
6.95889					0.693227
7.05889					0.691419
7.15889					0.695882
7.25889					0.69499
7.35889					0.694582
7.45889					0.698429
7.55889					0.698865
7.65889					0.703331
7.75889					0.702514
7.85889					0.703088
7.95889					0.706216
8.05889					0.708027
8.15889					0.706004
8.25889					0.708091
8.35889					0.707946
8.45889					0.71053
8.55889					0.715226
8.65889					0.712551
8.75889					0.711355
8.85889					0.710172
8.95889					0.716294
9.05889					0.715865
9.15889					0.717919
9.25889					0.720439
9.35889					0.717885
9.45889					0.723513
9.55889					0.725412
9.65889					0.724162
9.75889					0.726371
9.85889					0.725895
9.95889					0.730196
10.0589					0.725827
10.1589					0.7248
10.2589					0.725452
10.3589					0.734523
10.4589					0.729243
10.5589					0.730571
10.6589					0.733375
10.7589					0.736047
10.8589					0.7318
10.9589					0.738405
11.0589					0.739922
11.1589					0.741496
11.2589					0.743871
11.3589					0.744334
11.4589					0.738449
11.5589					0.741861
11.6589					0.745266
11.7589					0.742567
11.8589					0.748665
11.9589					0.745709
12.0589					0.753533
12.1589					0.755192
12.2589					0.749979
12.3589					0.752675
12.4589					0.753702
12.5589					0.754391
12.6589					0.757965
12.7589					0.755415
12.8589					0.750898
12.9589					0.754577
13.0589					0.754644
13.1589					0.758492
13.2589					0.757408
13.3589					0.755236
13.4589					0.75886
13.5589					0.763019
13.6589					0.766553
13.7589					0.760056
13.8589					0.765583
13.9589					0.766154
14.0589					0.763948
14.1589					0.768326
14.2589					0.76211
14.3589					0.763637
14.4589					0.765049
14.5589					0.765201
14.6589					0.769928
14.7589					0.765087
14.8589					0.767897
14.9589					0.766685
15.0589					0.769046
15.1589					0.766519
15.2589					0.765006
15.3589					0.764364
15.4589					0.768103
15.5589					0.765333
15.6589					0.7691
15.7589					0.764847
15.8589					0.769418
15.9589					0.767884
16.0589					0.770114
16.1589					0.769306
16.2589					0.771823
16.3589					0.768235
16.4589					0.765053
16.5589					0.767134
16.6589					0.768965
16.7589					0.767279
16.8589					0.771235
16.9589					0.768002
17.0589					0.771972
17.1589					0.773242
17.2589					0.768181
17.3589					0.769624
17.4589					0.772512
17.5589					0.771546
17.6589					0.771191
17.7589					0.763131
17.8589					0.769306
17.9589					0.77287
18.0589					0.76838
18.1589					0.771002
18.2589					0.767472
18.3589					0.776911
18.4589					0.766881
18.5589					0.770978
18.6589					0.77133
18.7589					0.770691
18.8589					0.765813
18.9589					0.770164
19.0589					0.773184
19.1589					0.772583
19.2589					0.771127
19.3589					0.765583
19.4589					0.767529
19.5589					0.769897
19.6589					0.769593
19.7589					0.765239
19.8589					0.766978
19.9589					0.76734
20.0589					0.76987
20.1589					0.767904
20.2589					0.762485
20.3589					0.770279
20.4589					0.771931
20.5589					0.768408
20.6589					0.767222
20.7589					0.768053
20.8589					0.765485
20.9589					0.76934
21.0589					0.767222
21.1589					0.768931
21.2589					0.765229
21.3589					0.765438
21.4589					0.768914
21.5589					0.76636
21.6589					0.76884
21.7589					0.764803
21.8589					0.766732
21.9589					0.764924
22.0589					0.767712
22.1589					0.762553
22.2589					0.763982
22.3589					0.765718
22.4589					0.767228
22.5589					0.765995
22.6589					0.761546
22.7589					0.762438
22.8589					0.760073
22.9589					0.763813
23.0589					0.766593
23.1589					0.76436
23.2589					0.762347
23.3589					0.764745
23.4589					0.761823
23.5589					0.76237
23.6589					0.767725
23.7589					0.757469
23.8589					0.756888
23.9589					0.759252
24.0589					0.757813
24.1589					0.760094
24.2589					0.756455
24.3589					0.757445
24.4589					0.7561
24.5589					0.759644
24.6589					0.7593
24.7589					0.754286
24.8589					0.75932
24.9589					0.755195
25.0589					0.754492
25.1589					0.755236
25.2589					0.757732
25.3589					0.748726
25.4589					0.750107
25.5589					0.753989
25.6589					0.750979
25.7589					0.754377
25.8589					0.751479
25.9589					0.751016
26.0589					0.74806
26.1589					0.748465
26.2589					0.748523
26.3589					0.75705
26.4589					0.745435
26.5589					0.74654
26.6589					0.750013
26.7589					0.748989
26.8589					0.745628
26.9589					0.750219
27.0589					0.746121
27.1589					0.746884
27.2589					0.74605
27.3589					0.744368
27.4589					0.741682
27.5589					0.744702
27.6589					0.74932
27.7589					0.744884
27.8589					0.743259
27.9589					0.744982
28.0589					0.741631
28.1589					0.745908
28.2589					0.743911
28.3589					0.743482
28.4589					0.741033
28.5589					0.7398
28.6589					0.741466
28.7589					0.741611
28.8589					0.744158
28.9589					0.74431
29.0589					0.740766
29.1589					0.739388
29.2589					0.744688
29.3589					0.73904
29.4589					0.740797
29.5589					0.742236
29.6589					0.74634
29.7589					0.7448
29.8589					0.741016
29.9589					0.739486
30.0589					0.734162
30.1589					0.735983
0.244444						0.099042
0.344444						0.132277
0.444444						0.162929
0.544444						0.198401
0.644444						0.227518
0.744444						0.255575
0.844444						0.281828
0.944444						0.299425
1.04444						0.321702
1.14444						0.339664
1.24444						0.352671
1.34444						0.369853
1.44444						0.38016
1.54444						0.389633
1.64444						0.401754
1.74444						0.415217
1.84444						0.425895
1.94444						0.434412
2.04444						0.449202
2.14444						0.454597
2.24444						0.46759
2.34444						0.476766
2.44444						0.48538
2.54444						0.497569
2.64444						0.503711
2.74444						0.511971
2.84444						0.526937
2.94444						0.527197
3.04444						0.539724
3.14444						0.549913
3.24444						0.556348
3.34444						0.567568
3.44444						0.572176
3.54444						0.579287
3.64444						0.588233
3.74444						0.591489
3.84444						0.597908
3.94444						0.606756
4.04444						0.618269
4.14444						0.618384
4.24444						0.625046
4.34444						0.627559
4.44444						0.637813
4.54444						0.640066
4.64444						0.646478
4.74444						0.651613
4.84444						0.655528
4.94444						0.660451
5.04444						0.667863
5.14444						0.670829
5.24444						0.677653
5.34444						0.679214
5.44444						0.68141
5.54444						0.692011
5.64444						0.69294
5.74444						0.694696
5.84444						0.700811
5.94444						0.703271
6.04444						0.706466
6.14444						0.711014
6.24444						0.711321
6.34444						0.71599
6.44444						0.722986
6.54444						0.728935
6.64444						0.726675
6.74444						0.728679
6.84444						0.735692
6.94444						0.737101
7.04444						0.740614
7.14444						0.74378
7.24444						0.741131
7.34444						0.746739
7.44444						0.750634
7.54444						0.750915
7.64444						0.753631
7.74444						0.757185
7.84444						0.761161
7.94444						0.759482
8.04444						0.758418
8.14444						0.762516
8.24444						0.768877
8.34444						0.764745
8.44444						0.764522
8.54444						0.770401
8.64444						0.768212
8.74444						0.767137
8.84444						0.779654
8.94444						0.771262
9.04444						0.775323
9.14444						0.779873
9.24444						0.780637
9.34444						0.784056
9.44444						0.781563
9.54444						0.785323
9.64444						0.787995
9.74444						0.788583
9.84444						0.791218
9.94444						0.791231
10.0444						0.793866
10.1444						0.795792
10.2444						0.800633
10.3444						0.802302
10.4444						0.802829
10.5444						0.803069
10.6444						0.806535
10.7444						0.802944
10.8444						0.810825
10.9444						0.810761
11.0444						0.814221
11.1444						0.810785
11.2444						0.816758
11.3444						0.81545
11.4444						0.809255
11.5444						0.810906
11.6444						0.814072
11.7444						0.811994
11.8444						0.813866
11.9444						0.818379
12.0444						0.820521
12.1444						0.82044
12.2444						0.819315
12.3444						0.819048
12.4444						0.816271
12.5444						0.824055
12.6444						0.821055
12.7444						0.816444
12.8444						0.818886
12.9444						0.821727
13.0444						0.818166
13.1444						0.822589
13.2444						0.818001
13.3444						0.819818
13.4444						0.819058
13.5444						0.818947
13.6444						0.822906
13.7444						0.820302
13.8444						0.820798
13.9444						0.820416
14.0444						0.820862
14.1444						0.818572
14.2444						0.823065
14.3444						0.822237
14.4444						0.828379
14.5444						0.821484
14.6444						0.823008
14.7444						0.826778
14.8444						0.826112
14.9444						0.825825
15.0444						0.823633
15.1444						0.826886
15.2444						0.826149
15.3444						0.826396
15.4444						0.825903
15.5444						0.824967
15.6444						0.824339
15.7444						0.823095
15.8444						0.82621
15.9444						0.825379
16.0444						0.821514
16.1444						0.828768
16.2444						0.822987
16.3444						0.827264
16.4444						0.825028
16.5444						0.828862
16.6444						0.827659
16.7444						0.831693
16.8444						0.827659
16.9444						0.832254
17.0444						0.831045
17.1444						0.83072
17.2444						0.829007
17.3444						0.828714
17.4444						0.834524
17.5444						0.831325
17.6444						0.828811
17.7444						0.830781
17.8444						0.829325
17.9444						0.830268
18.0444						0.828649
18.1444						0.825855
18.2444						0.827386
18.3444						0.825903
18.4444						0.832007
18.5444						0.827548
18.6444						0.830119
18.7444						0.826788
18.8444						0.826193
18.9444						0.826616
19.0444						0.825626
19.1444						0.828051
19.2444						0.825048
19.3444						0.826227
19.4444						0.823068
19.5444						0.823862
19.6444						0.821166
19.7444						0.816778
19.8444						0.82897
19.9444						0.826649
20.0444						0.825957
20.1444						0.828882
20.2444						0.824443
20.3444						0.824913
20.4444						0.826058
20.5444						0.824308
20.6444						0.822146
20.7444						0.824011
20.8444						0.823122
20.9444						0.82469
21.0444						0.821903
21.1444						0.822876
21.2444						0.820903
21.3444						0.821258
21.4444						0.821964
21.5444						0.822731
21.6444						0.825035
21.7444						0.821845
21.8444						0.817268
21.9444						0.821133
22.0444						0.816947
22.1444						0.817788
22.2444						0.814923
22.3444						0.820677
22.4444						0.817927
22.5444						0.817133
22.6444						0.813981
22.7444						0.817207
22.8444						0.814292
22.9444						0.819166
23.0444						0.816869
23.1444						0.817612
23.2444						0.81339
23.3444						0.819599
23.4444						0.816052
23.5444						0.817825
23.6444						0.816947
23.7444						0.811663
23.8444						0.816339
23.9444						0.811102
24.0444						0.813883
24.1444						0.811048
24.2444						0.809011
24.3444						0.812217
24.4444						0.810113
24.5444						0.808126
24.6444						0.812231
24.7444						0.809079
24.8444						0.809856
24.9444						0.810809
25.0444						0.807015
25.1444						0.80769
25.2444						0.805518
25.3444						0.807596
25.4444						0.807934
25.5444						0.806292
25.6444						0.803782
25.7444						0.804937
25.8444						0.802991
25.9444						0.805974
26.0444						0.807542
26.1444						0.80719
26.2444						0.802934
26.3444						0.805576
26.4444						0.799981
26.5444						0.803197
26.6444						0.797778
26.7444						0.803478
26.8444						0.804315
26.9444						0.798272
27.0444						0.800859
27.1444						0.80088
27.2444						0.797397
27.3444						0.800096
27.4444						0.799532
27.5444						0.798609
27.6444						0.801096
27.7444						0.801292
27.8444						0.798582
27.9444						0.798326
28.0444						0.800343
28.1444						0.797353
28.2444						0.793978
28.3444						0.796981
28.4444						0.797403
28.5444						0.79612
28.6444						0.793137
28.7444						0.794481
28.8444						0.795755
28.9444						0.793738
29.0444						0.794779
29.1444						0.796393
29.2444						0.790846
29.3444						0.792468
29.4444						0.790414
29.5444						0.793208
29.6444						0.788211
29.7444						0.789589
29.8444						0.79491
29.9444						0.791049
30.0444						0.787775
30.1444						0.792164
0.23							0.058418
0.33							0.099302
0.43							0.153003
0.53							0.21463
0.63							0.27902
0.73							0.344495
0.83							0.409027
0.93							0.472985
1.03							0.524917
1.13							0.574419
1.23							0.620675
1.33							0.662201
1.43							0.701271
1.53							0.737915
1.63							0.766026
1.73							0.798143
1.83							0.825589
1.93							0.850237
2.03							0.873736
2.13							0.90135
2.23							0.921198
2.33							0.943353
2.43							0.958045
2.53							0.977703
2.63							0.99525
2.73							1.01541
2.83							1.02509
2.93							1.03758
3.03							1.05661
3.13							1.06875
3.23							1.08476
3.33							1.09269
3.43							1.113
3.53							1.11491
3.63							1.13105
3.73							1.14152
3.83							1.15456
3.93							1.16224
4.03							1.17706
4.13							1.18235
4.23							1.18441
4.33							1.1934
4.43							1.19685
4.53							1.20366
4.63							1.21418
4.73							1.22111
4.83							1.23121
4.93							1.23293
5.03							1.23605
5.13							1.2454
5.23							1.25303
5.33							1.25799
5.43							1.25962
5.53							1.26906
5.63							1.26605
5.73							1.27055
5.83							1.28905
5.93							1.27685
6.03							1.29048
6.13							1.28465
6.23							1.29409
6.33							1.28901
6.43							1.30068
6.53							1.3048
6.63							1.30543
6.73							1.30724
6.83							1.30556
6.93							1.31226
7.03							1.31733
7.13							1.32138
7.23							1.31859
7.33							1.32855
7.43							1.32612
7.53							1.32993
7.63							1.32395
7.73							1.33364
7.83							1.33166
7.93							1.34183
8.03							1.3449
8.13							1.34539
8.23							1.33798
8.33							1.34497
8.43							1.34677
8.53							1.33765
8.63							1.34261
8.73							1.34757
8.83							1.34345
8.93							1.35587
9.03							1.35605
9.13							1.35323
9.23							1.3516
9.33							1.35613
9.43							1.36168
9.53							1.3596
9.63							1.368
9.73							1.35935
9.83							1.35957
9.93							1.36532
10.03							1.3618
10.13							1.36357
10.23							1.37408
10.33							1.37494
10.43							1.37581
10.53							1.36892
10.63							1.37563
10.73							1.37201
10.83							1.37039
10.93							1.37409
11.03							1.37409
11.13							1.37173
11.23							1.37596
11.33							1.37063
11.43							1.37241
11.53							1.37389
11.63							1.37382
11.73							1.37681
11.83							1.38064
11.93							1.37992
12.03							1.37815
12.13							1.37864
12.23							1.38322
12.33							1.38299
12.43							1.37792
12.53							1.3787
12.63							1.3832
12.73							1.37959
12.83							1.37659
12.93							1.37592
13.03							1.38473
13.13							1.37961
13.23							1.37721
13.33							1.37918
13.43							1.37546
13.53							1.37381
13.63							1.38018
13.73							1.3828
13.83							1.37475
13.93							1.3804
14.03							1.38004
14.13							1.38047
14.23							1.37998
14.33							1.37773
14.43							1.38123
14.53							1.37796
14.63							1.37837
14.73							1.37972
14.83							1.37695
14.93							1.37141
15.03							1.37295
15.13							1.37424
15.23							1.36908
15.33							1.36723
15.43							1.36855
15.53							1.37231
15.63							1.37464
15.73							1.36846
15.83							1.37661
15.93							1.37403
16.03							1.3705
16.13							1.36623
16.23							1.36883
16.33							1.37017
16.43							1.36525
16.53							1.35848
16.63							1.36103
16.73							1.35974
16.83							1.35519
16.93							1.35227
17.03							1.35585
17.13							1.3506
17.23							1.34657
17.33							1.34606
17.43							1.34445
17.53							1.35064
17.63							1.3489
17.73							1.34735
17.83							1.34935
17.93							1.34438
18.03							1.34857
18.13							1.34693
18.23							1.34682
18.33							1.34409
18.43							1.35349
18.53							1.34864
18.63							1.34738
18.73							1.34066
18.83							1.33864
18.93							1.33258
19.03							1.3337
19.13							1.33517
19.23							1.33615
19.33							1.33047
19.43							1.33393
19.53							1.32888
19.63							1.3297
19.73							1.33022
19.83							1.32464
19.93							1.33119
20.03							1.33041
[truncated: 2,801 more rows]

## Sheet: primary data +-ATP n=3
time	native	+8pos	+8neg	-8pos	-8neg	-17neg	-13pos	native -ATP	+8pos -ATP	+8neg -ATP	-8pos -ATP	-8neg -ATP	-17neg -ATP	-13pos -ATP
0.201111	0.055058
0.301111	0.107925
0.401111	0.174763
0.501111	0.247721
0.601111	0.320207
0.701111	0.386777
0.801111	0.447735
0.901111	0.497768
1.00111	0.540018
1.10111	0.576751
1.20111	0.603377
1.30111	0.627102
1.40111	0.650117
1.50111	0.673071
1.60111	0.690064
1.70111	0.701509
1.80111	0.713169
1.90111	0.731276
2.00111	0.745119
2.10111	0.760534
2.20111	0.769405
2.30111	0.78187
2.40111	0.788723
2.50111	0.800329
2.60111	0.807261
2.70111	0.815935
2.80111	0.825225
2.90111	0.83488
3.00111	0.843183
3.10111	0.848528
3.20111	0.859976
3.30111	0.863709
3.40111	0.874295
3.50111	0.875634
3.60111	0.880976
3.70111	0.888651
3.80111	0.893307
3.90111	0.894141
4.00111	0.902433
4.10111	0.905681
4.20111	0.913399
4.30111	0.910913
4.40111	0.918488
4.50111	0.921281
4.60111	0.929809
4.70111	0.92759
4.80111	0.927068
4.90111	0.933035
5.00111	0.938046
5.10111	0.937218
5.20111	0.944225
5.30111	0.947588
5.40111	0.948104
5.50111	0.95235
5.60111	0.950529
5.70111	0.955
5.80111	0.95585
5.90111	0.954332
6.00111	0.958794
6.10111	0.961677
6.20111	0.961637
6.30111	0.960162
6.40111	0.965322
6.50111	0.967374
6.60111	0.967437
6.70111	0.97114
6.80111	0.96944
6.90111	0.972339
7.00111	0.973201
7.10111	0.974236
7.20111	0.974755
7.30111	0.979195
7.40111	0.981532
7.50111	0.983216
7.60111	0.982069
7.70111	0.98287
7.80111	0.984324
7.90111	0.985119
8.00111	0.981778
8.10111	0.989966
8.20111	0.983793
8.30111	0.987332
8.40111	0.984342
8.50111	0.98827
8.60111	0.992321
8.70111	0.988224
8.80111	0.989805
8.90111	0.989113
9.00111	0.991927
9.10111	0.99196
9.20111	1
9.30111	0.993487
9.40111	0.994246
9.50111	0.994027
9.60111	0.994303
9.70111	0.990282
9.80111	0.995211
9.90111	0.999696
10.0011	0.996916
10.1011	0.995329
10.2011	0.997244
10.3011	0.993909
10.4011	0.9902
10.5011	0.99647
10.6011	0.998282
10.7011	0.994998
10.8011	0.990497
10.9011	0.989402
11.0011	0.997593
11.1011	0.992015
11.2011	0.997293
11.3011	0.999366
11.4011	0.993654
11.5011	0.994998
11.6011	0.994883
11.7011	0.996179
11.8011	0.995402
11.9011	0.994306
12.0011	0.998055
12.1011	0.995478
12.2011	0.99193
12.3011	0.990003
12.4011	0.990279
12.5011	0.995508
12.6011	0.995077
12.7011	0.996003
12.8011	0.997882
12.9011	0.994543
13.0011	0.989987
13.1011	0.990154
13.2011	0.993872
13.3011	0.992828
13.4011	0.992473
13.5011	0.994312
13.6011	0.993332
13.7011	0.994185
13.8011	0.99366
13.9011	0.987292
14.0011	0.991056
14.1011	0.990276
14.2011	0.989365
14.3011	0.993754
14.4011	0.988858
14.5011	0.990282
14.6011	0.988297
14.7011	0.988245
14.8011	0.987942
14.9011	0.984801
15.0011	0.991459
15.1011	0.991405
15.2011	0.98515
15.3011	0.986294
15.4011	0.988725
15.5011	0.989038
15.6011	0.98755
15.7011	0.987523
15.8011	0.980291
15.9011	0.984452
16.0011	0.989053
16.1011	0.983165
16.2011	0.983165
16.3011	0.985456
16.4011	0.98297
16.5011	0.980233
16.6011	0.984382
16.7011	0.989818
16.8011	0.987004
16.9011	0.984907
17.0011	0.984452
17.1011	0.982221
17.2011	0.98297
17.3011	0.984254
17.4011	0.981845
17.5011	0.981335
17.6011	0.979896
17.7011	0.980294
17.8011	0.981495
17.9011	0.98047
18.0011	0.979162
18.1011	0.980898
18.2011	0.978655
18.3011	0.982169
18.4011	0.979404
18.5011	0.979547
18.6011	0.973231
18.7011	0.978576
18.8011	0.979523
18.9011	0.975614
19.0011	0.978042
19.1011	0.979198
19.2011	0.974169
19.3011	0.973556
19.4011	0.978509
19.5011	0.972339
19.6011	0.970994
19.7011	0.976667
19.8011	0.977043
19.9011	0.970612
20.0011	0.974727
20.1011	0.97358
20.2011	0.977183
20.3011	0.974148
20.4011	0.97016
20.5011	0.976218
20.6011	0.971601
20.7011	0.976026
20.8011	0.968281
20.9011	0.96751
21.0011	0.969674
21.1011	0.974733
21.2011	0.968864
21.3011	0.976524
21.4011	0.969422
21.5011	0.971222
21.6011	0.969346
21.7011	0.964612
21.8011	0.967877
21.9011	0.967707
22.0011	0.966527
22.1011	0.967012
22.2011	0.968114
22.3011	0.96086
22.4011	0.967037
22.5011	0.962754
22.6011	0.966506
22.7011	0.962062
22.8011	0.967295
22.9011	0.963841
23.0011	0.966071
23.1011	0.962554
23.2011	0.957695
23.3011	0.95988
23.4011	0.960624
23.5011	0.963989
23.6011	0.963786
23.7011	0.955998
23.8011	0.961707
23.9011	0.964211
24.0011	0.956581
24.1011	0.959595
24.2011	0.957598
24.3011	0.9568
24.4011	0.9574
24.5011	0.95849
24.6011	0.954642
24.7011	0.955755
24.8011	0.952818
24.9011	0.95439
25.0011	0.955789
25.1011	0.954526
25.2011	0.958715
25.3011	0.952884
25.4011	0.954651
25.5011	0.954605
25.6011	0.954293
25.7011	0.955279
25.8011	0.950377
25.9011	0.953931
26.0011	0.953707
26.1011	0.954135
26.2011	0.949127
26.3011	0.950648
26.4011	0.951157
26.5011	0.951655
26.6011	0.951206
26.7011	0.952727
26.8011	0.94862
26.9011	0.944987
27.0011	0.946748
27.1011	0.947998
27.2011	0.944177
27.3011	0.948341
27.4011	0.943382
27.5011	0.94286
27.6011	0.943536
27.7011	0.950229
27.8011	0.941415
27.9011	0.947813
28.0011	0.940693
28.1011	0.94632
28.2011	0.949173
28.3011	0.941518
28.4011	0.944565
28.5011	0.93614
28.6011	0.943664
28.7011	0.942149
28.8011	0.939576
28.9011	0.944914
29.0011	0.939078
29.1011	0.938738
29.2011	0.94048
29.3011	0.937242
29.4011	0.941803
29.5011	0.943027
29.6011	0.942559
29.7011	0.940884
29.8011	0.940486
29.9011	0.938705
30.0011	0.937466
30.1011	0.939779
0.186666		0.070859
0.286666		0.114751
0.386666		0.152801
0.486666		0.19317
0.586666		0.224303
0.686666		0.257552
0.786666		0.28786
0.886666		0.319815
0.986666		0.350111
1.08667		0.379405
1.18667		0.402753
1.28667		0.424651
1.38667		0.451772
1.48667		0.476207
1.58667		0.494821
1.68667		0.518111
1.78667		0.537229
1.88667		0.557212
1.98667		0.569974
2.08667		0.588846
2.18667		0.605717
2.28667		0.624744
2.38667		0.637188
2.48667		0.645877
2.58667		0.660515
2.68667		0.671353
2.78667		0.686941
2.88667		0.692917
2.98667		0.704261
3.08667		0.712629
3.18667		0.71927
3.28667		0.724642
3.38667		0.729844
3.48667		0.741929
3.58667		0.743304
3.68667		0.746427
3.78667		0.754021
3.88667		0.756424
3.98667		0.757599
4.08667		0.764552
4.18667		0.767967
4.28667		0.768659
4.38667		0.775002
4.48667		0.77488
4.58667		0.783336
4.68667		0.780088
4.78667		0.786344
4.88667		0.788823
4.98667		0.784793
5.08667		0.791846
5.18667		0.79591
5.28667		0.798505
5.38667		0.798508
5.48667		0.798845
5.58667		0.802023
5.68667		0.809352
5.78667		0.808697
5.88667		0.806159
5.98667		0.808527
6.08667		0.816251
6.18667		0.811659
6.28667		0.81748
6.38667		0.818906
6.48667		0.821595
6.58667		0.819963
6.68667		0.828421
6.78667		0.827046
6.88667		0.830889
6.98667		0.829957
7.08667		0.832385
7.18667		0.83287
7.28667		0.837083
7.38667		0.837505
7.48667		0.839599
7.58667		0.844382
7.68667		0.843815
7.78667		0.843323
7.88667		0.849508
7.98667		0.844218
8.08667		0.846358
8.18667		0.847059
8.28667		0.844913
8.38667		0.85102
8.48667		0.854079
8.58667		0.850965
8.68667		0.853639
8.78667		0.854377
8.88667		0.854805
8.98667		0.854031
9.08667		0.860167
9.18667		0.85953
9.28667		0.857676
9.38667		0.859897
9.48667		0.860611
9.58667		0.858832
9.68667		0.864902
9.78667		0.865115
9.88667		0.865357
9.98667		0.862659
10.0867		0.86804
10.1867		0.867221
10.2867		0.867212
10.3867		0.868359
10.4867		0.868159
10.5867		0.868599
10.6867		0.866623
10.7867		0.868444
10.8867		0.869594
10.9867		0.87076
11.0867		0.871388
11.1867		0.873725
11.2867		0.873567
11.3867		0.870778
11.4867		0.870053
11.5867		0.871825
11.6867		0.872596
11.7867		0.867749
11.8867		0.872034
11.9867		0.871822
12.0867		0.870911
12.1867		0.872918
12.2867		0.872353
12.3867		0.870893
12.4867		0.870359
12.5867		0.872918
12.6867		0.870617
12.7867		0.878047
12.8867		0.870523
12.9867		0.873898
13.0867		0.870547
13.1867		0.873953
13.2867		0.876223
13.3867		0.873834
13.4867		0.8775
13.5867		0.873725
13.6867		0.878302
13.7867		0.871352
13.8867		0.868842
13.9867		0.874975
14.0867		0.875843
14.1867		0.871206
14.2867		0.871057
14.3867		0.87584
14.4867		0.870086
14.5867		0.868641
14.6867		0.874062
14.7867		0.870508
14.8867		0.870426
14.9867		0.869136
15.0867		0.871239
15.1867		0.873103
15.2867		0.874933
15.3867		0.872417
15.4867		0.869172
15.5867		0.871182
15.6867		0.872553
15.7867		0.867637
15.8867		0.869928
15.9867		0.871676
16.0867		0.870292
16.1867		0.867998
16.2867		0.868238
16.3867		0.87045
16.4867		0.870326
16.5867		0.869828
16.6867		0.868617
16.7867		0.864447
16.8867		0.867552
16.9867		0.86614
17.0867		0.866565
17.1867		0.867543
17.2867		0.869949
17.3867		0.866811
17.4867		0.864204
17.5867		0.866259
17.6867		0.862544
17.7867		0.863706
17.8867		0.86849
17.9867		0.863561
18.0867		0.861199
18.1867		0.864222
18.2867		0.863928
18.3867		0.864347
18.4867		0.862553
18.5867		0.862529
18.6867		0.858498
18.7867		0.861961
18.8867		0.859925
18.9867		0.856152
19.0867		0.859463
19.1867		0.858522
19.2867		0.859554
19.3867		0.861822
19.4867		0.858556
19.5867		0.852713
19.6867		0.854462
19.7867		0.856616
19.8867		0.855554
19.9867		0.852771
20.0867		0.854149
20.1867		0.846865
20.2867		0.854714
20.3867		0.853721
20.4867		0.849378
20.5867		0.853876
20.6867		0.848149
20.7867		0.847675
20.8867		0.849685
20.9867		0.852025
21.0867		0.851439
21.1867		0.849275
21.2867		0.848871
21.3867		0.845439
21.4867		0.850738
21.5867		0.847624
21.6867		0.847442
21.7867		0.84702
21.8867		0.844977
21.9867		0.847123
22.0867		0.838868
22.1867		0.84746
22.2867		0.844598
22.3867		0.841733
22.4867		0.841948
22.5867		0.842722
22.6867		0.842155
22.7867		0.842847
22.8867		0.844649
22.9867		0.834819
23.0867		0.83478
23.1867		0.842149
23.2867		0.836388
23.3867		0.838692
23.4867		0.834212
23.5867		0.839645
23.6867		0.838124
23.7867		0.836767
23.8867		0.838409
23.9867		0.832355
24.0867		0.836197
24.1867		0.832118
24.2867		0.833456
24.3867		0.832846
24.4867		0.831511
24.5867		0.829177
24.6867		0.832916
24.7867		0.828667
24.8867		0.826834
24.9867		0.828339
25.0867		0.829984
25.1867		0.824597
25.2867		0.821462
25.3867		0.825462
25.4867		0.823626
25.5867		0.823076
25.6867		0.827377
25.7867		0.821963
25.8867		0.82111
25.9867		0.823137
26.0867		0.82409
26.1867		0.818661
26.2867		0.813419
26.3867		0.816418
26.4867		0.815313
26.5867		0.820573
26.6867		0.818445
26.7867		0.812348
26.8867		0.816202
26.9867		0.813838
27.0867		0.810542
27.1867		0.813935
27.2867		0.811112
27.3867		0.813923
27.4867		0.808712
27.5867		0.808332
27.6867		0.809722
27.7867		0.809619
27.8867		0.806338
27.9867		0.811146
28.0867		0.80748
28.1867		0.809771
28.2867		0.808599
28.3867		0.809677
28.4867		0.805045
28.5867		0.806375
28.6867		0.807398
28.7867		0.803449
28.8867		0.807458
28.9867		0.800912
29.0867		0.80107
29.1867		0.799968
29.2867		0.802375
29.3867		0.800456
29.4867		0.797594
29.5867		0.802111
29.6867		0.799488
29.7867		0.801133
29.8867		0.796817
29.9867		0.795482
30.0867		0.794842
0.172222			0.021118
0.272222			0.02856
0.372222			0.038569
0.472222			0.053201
0.572222			0.069344
0.672222			0.091057
0.772222			0.113646
0.872222			0.138197
0.972222			0.167211
1.07222			0.19263
1.17222			0.222079
1.27222			0.249424
1.37222			0.280648
1.47222			0.305839
1.57222			0.334271
1.67222			0.364521
1.77222			0.384725
1.87222			0.413943
1.97222			0.436269
2.07222			0.461897
2.17222			0.48242
2.27222			0.502812
2.37222			0.520989
2.47222			0.537885
2.57222			0.560523
2.67222			0.577489
2.77222			0.592727
2.87222			0.609341
2.97222			0.625251
3.07222			0.636823
3.17222			0.653473
3.27222			0.667198
3.37222			0.686243
3.47222			0.692015
3.57222			0.70804
3.67222			0.717986
3.77222			0.728023
3.87222			0.739726
3.97222			0.752734
4.07222			0.75938
4.17222			0.770316
4.27222			0.784322
4.37222			0.796059
4.47222			0.805825
4.57222			0.812099
4.67222			0.824369
4.77222			0.830795
4.87222			0.836315
4.97222			0.846701
5.07222			0.860759
5.17222			0.864593
5.27222			0.873264
5.37222			0.875898
5.47222			0.885977
5.57222			0.894354
5.67222			0.898828
5.77222			0.909966
5.87222			0.914425
5.97222			0.927329
6.07222			0.927833
6.17222			0.936516
6.27222			0.938859
6.37222			0.944878
6.47222			0.952705
6.57222			0.959039
6.67222			0.965401
6.77222			0.967507
6.87222			0.974788
6.97222			0.980728
7.07222			0.985514
7.17222			0.987098
7.27222			0.999402
7.37222			0.997781
7.47222			1.00735
7.57222			1.00825
7.67222			1.0135
7.77222			1.01447
7.87222			1.02468
7.97222			1.02394
8.07222			1.02663
8.17222			1.0266
8.27222			1.0358
8.37222			1.03902
8.47222			1.0437
8.57222			1.04553
8.67222			1.05361
8.77222			1.05573
8.87222			1.05413
8.97222			1.05742
9.07222			1.05921
9.17222			1.06694
9.27222			1.06836
9.37222			1.07196
9.47222			1.07667
9.57222			1.07865
9.67222			1.08008
9.77222			1.08242
9.87222			1.08135
9.97222			1.08287
10.0722			1.08801
10.1722			1.08817
10.2722			1.0944
10.3722			1.09773
10.4722			1.09563
10.5722			1.10018
10.6722			1.09816
10.7722			1.10104
10.8722			1.10311
10.9722			1.10549
11.0722			1.10331
11.1722			1.11038
11.2722			1.1094
11.3722			1.1132
11.4722			1.11374
11.5722			1.11435
11.6722			1.11176
11.7722			1.1157
11.8722			1.11493
11.9722			1.11861
12.0722			1.11952
12.1722			1.11614
12.2722			1.12285
12.3722			1.12489
12.4722			1.12078
12.5722			1.12088
12.6722			1.12529
12.7722			1.12757
12.8722			1.12502
12.9722			1.13027
13.0722			1.1348
13.1722			1.12907
13.2722			1.13093
13.3722			1.13569
13.4722			1.13485
13.5722			1.13941
13.6722			1.13481
13.7722			1.13647
13.8722			1.13382
13.9722			1.13916
14.0722			1.13682
14.1722			1.13489
14.2722			1.13647
14.3722			1.13372
14.4722			1.13918
14.5722			1.13942
14.6722			1.14008
14.7722			1.13989
14.8722			1.14068
14.9722			1.14205
15.0722			1.1399
15.1722			1.14373
15.2722			1.14149
15.3722			1.14469
15.4722			1.14243
15.5722			1.1441
15.6722			1.13959
15.7722			1.14268
15.8722			1.14098
15.9722			1.14152
16.0722			1.14032
16.1722			1.13723
16.2722			1.14073
16.3722			1.14543
16.4722			1.14756
16.5722			1.14386
16.6722			1.14743
16.7722			1.14369
16.8722			1.14517
16.9722			1.13816
17.0722			1.13999
17.1722			1.15053
17.2722			1.14512
17.3722			1.14469
17.4722			1.13849
17.5722			1.1412
17.6722			1.14531
17.7722			1.14051
17.8722			1.14199
17.9722			1.13923
18.0722			1.14374
18.1722			1.13873
18.2722			1.13897
18.3722			1.14045
18.4722			1.1431
18.5722			1.13901
18.6722			1.14075
18.7722			1.13903
18.8722			1.13875
18.9722			1.13735
19.0722			1.13587
19.1722			1.14118
19.2722			1.132
19.3722			1.13711
19.4722			1.13565
19.5722			1.13821
19.6722			1.13842
19.7722			1.13881
19.8722			1.1399
19.9722			1.13832
20.0722			1.13482
20.1722			1.13832
20.2722			1.13398
20.3722			1.12995
20.4722			1.13437
20.5722			1.13442
20.6722			1.13349
20.7722			1.12897
20.8722			1.13155
20.9722			1.13251
21.0722			1.12505
21.1722			1.12949
21.2722			1.12829
21.3722			1.12733
21.4722			1.12627
21.5722			1.12908
21.6722			1.1268
21.7722			1.12646
21.8722			1.12522
21.9722			1.1259
22.0722			1.12593
22.1722			1.12588
22.2722			1.12427
22.3722			1.12581
22.4722			1.12477
22.5722			1.12261
22.6722			1.1209
22.7722			1.12162
22.8722			1.11609
22.9722			1.12033
23.0722			1.11608
23.1722			1.12265
23.2722			1.12035
23.3722			1.11534
23.4722			1.11726
23.5722			1.11645
23.6722			1.11602
23.7722			1.11692
23.8722			1.11393
23.9722			1.11461
24.0722			1.1141
24.1722			1.11358
24.2722			1.11325
24.3722			1.11454
24.4722			1.10982
24.5722			1.11165
24.6722			1.10925
24.7722			1.10968
24.8722			1.10524
24.9722			1.11034
25.0722			1.10653
25.1722			1.10181
25.2722			1.10967
25.3722			1.10254
25.4722			1.10545
25.5722			1.09916
25.6722			1.10595
25.7722			1.10566
25.8722			1.10089
25.9722			1.10269
26.0722			1.09885
26.1722			1.10004
26.2722			1.09525
26.3722			1.09222
26.4722			1.09733
26.5722			1.09529
26.6722			1.09309
26.7722			1.10015
26.8722			1.09612
26.9722			1.095
27.0722			1.08966
27.1722			1.09293
27.2722			1.08964
27.3722			1.09154
27.4722			1.09112
27.5722			1.08483
27.6722			1.09343
27.7722			1.08304
27.8722			1.0846
27.9722			1.0815
28.0722			1.08673
28.1722			1.07806
28.2722			1.08139
28.3722			1.08615
28.4722			1.07971
28.5722			1.08268
28.6722			1.07631
28.7722			1.0785
28.8722			1.07635
28.9722			1.08398
29.0722			1.07643
29.1722			1.07464
29.2722			1.07729
29.3722			1.07555
29.4722			1.07523
29.5722			1.07103
29.6722			1.07342
29.7722			1.06856
29.8722			1.07239
29.9722			1.0711
30.0722			1.06841
0.157777				0.02737
0.257777				0.049061
0.357777				0.079612
0.457777				0.120099
0.557777				0.16343
0.657777				0.206351
0.757777				0.250143
0.857777				0.291845
0.957777				0.333066
1.05778				0.373147
1.15778				0.410271
1.25778				0.446178
1.35778				0.47692
1.45778				0.508184
1.55778				0.532752
1.65778				0.558298
1.75778				0.582915
1.85778				0.603119
1.95778				0.620207
2.05778				0.642641
2.15778				0.661401
2.25778				0.681902
2.35778				0.699642
2.45778				0.713761
2.55778				0.730262
2.65778				0.742421
2.75778				0.757781
2.85778				0.770091
2.95778				0.785221
3.05778				0.797421
3.15778				0.809807
3.25778				0.822023
3.35778				0.829851
3.45778				0.842012
3.55778				0.85224
3.65778				0.861048
3.75778				0.867709
3.85778				0.878633
3.95778				0.892606
4.05778				0.896084
4.15778				0.908412
4.25778				0.913423
4.35778				0.920373
4.45778				0.931263
4.55778				0.940762
4.65778				0.942656
4.75778				0.951534
4.85778				0.957136
4.95778				0.962521
5.05778				0.967116
5.15778				0.975847
5.25778				0.977143
5.35778				0.983411
5.45778				0.989702
5.55778				0.99491
5.65778				0.999317
5.75778				1.0004
5.85778				1.01022
5.95778				1.01603
6.05778				1.02142
6.15778				1.01236
6.25778				1.02665
6.35778				1.03122
6.45778				1.02313
6.55778				1.03574
6.65778				1.04158
6.75778				1.04306
6.85778				1.04525
6.95778				1.05186
7.05778				1.05224
7.15778				1.05308
7.25778				1.055
7.35778				1.06036
7.45778				1.0572
7.55778				1.06108
7.65778				1.06615
7.75778				1.06771
7.85778				1.07032
7.95778				1.06986
8.05778				1.07455
8.15778				1.0684
8.25778				1.0769
8.35778				1.07574
8.45778				1.08031
8.55778				1.08722
8.65778				1.08512
8.75778				1.08435
8.85778				1.08545
8.95778				1.08576
9.05778				1.09039
9.15778				1.0913
9.25778				1.08873
9.35778				1.09257
9.45778				1.09042
9.55778				1.09538
9.65778				1.09472
9.75778				1.09729
9.85778				1.09655
9.95778				1.09745
10.0578				1.09834
10.1578				1.1061
10.2578				1.10024
10.3578				1.10462
10.4578				1.10513
10.5578				1.10535
10.6578				1.10407
10.7578				1.1078
10.8578				1.10239
10.9578				1.10836
11.0578				1.10856
11.1578				1.10981
11.2578				1.10414
11.3578				1.11021
11.4578				1.1106
11.5578				1.11106
11.6578				1.11323
11.7578				1.11098
11.8578				1.1121
11.9578				1.11763
12.0578				1.11036
12.1578				1.11585
12.2578				1.11497
12.3578				1.11271
12.4578				1.10842
12.5578				1.11398
12.6578				1.11196
12.7578				1.11403
12.8578				1.10671
12.9578				1.11824
13.0578				1.12036
13.1578				1.11227
13.2578				1.11841
13.3578				1.11562
13.4578				1.11446
13.5578				1.11054
13.6578				1.11925
13.7578				1.11436
13.8578				1.11317
13.9578				1.11114
14.0578				1.11482
14.1578				1.12115
14.2578				1.11362
14.3578				1.11119
14.4578				1.11521
14.5578				1.11354
14.6578				1.11336
14.7578				1.11302
14.8578				1.10725
14.9578				1.10836
15.0578				1.1158
15.1578				1.1129
15.2578				1.10707
15.3578				1.11082
15.4578				1.11006
15.5578				1.10335
15.6578				1.11066
15.7578				1.10607
15.8578				1.10843
15.9578				1.10968
16.0578				1.10663
16.1578				1.10878
16.2578				1.10827
16.3578				1.11126
16.4578				1.10904
16.5578				1.10014
16.6578				1.10688
16.7578				1.10643
16.8578				1.10598
16.9578				1.10382
17.0578				1.10677
17.1578				1.0965
17.2578				1.10256
17.3578				1.09829
17.4578				1.0982
17.5578				1.10266
17.6578				1.09937
17.7578				1.10111
17.8578				1.10252
17.9578				1.09374
18.0578				1.09687
18.1578				1.09657
18.2578				1.09255
18.3578				1.10094
18.4578				1.09449
18.5578				1.09461
18.6578				1.09662
18.7578				1.09115
18.8578				1.0907
18.9578				1.09039
19.0578				1.09036
19.1578				1.08846
19.2578				1.08871
19.3578				1.08987
19.4578				1.08982
19.5578				1.08831
19.6578				1.0919
19.7578				1.08736
19.8578				1.08776
19.9578				1.08486
20.0578				1.08508
20.1578				1.08288
20.2578				1.08033
20.3578				1.08523
20.4578				1.08989
20.5578				1.08256
20.6578				1.08156
20.7578				1.08238
20.8578				1.08085
20.9578				1.06838
21.0578				1.07747
21.1578				1.07406
21.2578				1.07561
21.3578				1.07229
21.4578				1.07301
21.5578				1.06816
21.6578				1.06576
21.7578				1.07304
21.8578				1.06954
21.9578				1.06502
22.0578				1.07029
22.1578				1.06854
22.2578				1.07213
22.3578				1.06227
22.4578				1.06922
22.5578				1.06137
22.6578				1.06676
22.7578				1.06248
22.8578				1.06403
22.9578				1.06532
23.0578				1.06874
23.1578				1.05772
23.2578				1.06112
23.3578				1.06075
23.4578				1.06314
23.5578				1.05926
23.6578				1.05814
23.7578				1.05808
23.8578				1.05619
23.9578				1.05342
24.0578				1.05546
24.1578				1.05052
24.2578				1.05204
24.3578				1.05626
24.4578				1.05231
24.5578				1.05144
24.6578				1.05283
24.7578				1.05069
24.8578				1.05184
24.9578				1.04628
25.0578				1.04462
25.1578				1.04567
25.2578				1.0462
25.3578				1.04842
25.4578				1.04511
25.5578				1.04344
25.6578				1.04591
25.7578				1.04106
25.8578				1.03963
25.9578				1.03685
26.0578				1.04233
26.1578				1.0413
26.2578				1.03785
26.3578				1.03621
26.4578				1.03561
26.5578				1.03691
26.6578				1.03662
26.7578				1.03567
26.8578				1.03187
26.9578				1.03475
27.0578				1.03244
27.1578				1.03544
27.2578				1.02893
27.3578				1.02856
27.4578				1.02967
27.5578				1.03058
27.6578				1.0279
27.7578				1.0281
27.8578				1.02902
27.9578				1.02782
28.0578				1.02292
28.1578				1.02456
28.2578				1.02382
28.3578				1.02259
28.4578				1.02409
28.5578				1.01646
28.6578				1.02199
28.7578				1.01493
28.8578				1.02123
28.9578				1.01602
29.0578				1.01717
29.1578				1.0146
29.2578				1.01778
29.3578				1.00983
29.4578				1.00831
29.5578				1.01422
29.6578				1.01268
29.7578				1.01105
29.8578				1.00651
29.9578				1.00729
30.0578				1.00591
0.143333					0.039841
0.243333					0.094165
0.343333					0.152537
0.443333					0.197395
0.543333					0.230895
0.643333					0.26056
0.743333					0.285322
0.843333					0.306528
0.943333					0.325382
1.04333					0.347513
1.14333					0.363146
1.24333					0.378601
1.34333					0.397563
1.44333					0.412669
1.54333					0.425644
1.64333					0.438928
1.74333					0.452707
1.84333					0.463955
1.94333					0.478517
2.04333					0.489218
2.14333					0.502357
2.24333					0.510636
2.34333					0.520676
2.44333					0.535748
2.54333					0.544738
2.64333					0.551615
2.74333					0.561172
2.84333					0.566902
2.94333					0.57788
3.04333					0.581923
3.14333					0.593583
3.24333					0.598752
3.34333					0.609845
3.44333					0.612558
3.54333					0.619518
3.64333					0.622161
3.74333					0.628905
3.84333					0.633479
3.94333					0.642909
4.04333					0.643543
4.14333					0.650438
4.24333					0.656147
4.34333					0.662445
4.44333					0.665313
4.54333					0.66612
4.64333					0.673353
4.74333					0.676194
4.84333					0.679972
4.94333					0.678157
5.04333					0.681657
5.14333					0.687265
5.24333					0.689633
5.34333					0.697248
5.44333					0.696425
5.54333					0.700956
5.64333					0.701075
5.74333					0.705257
5.84333					0.703381
5.94333					0.708371
6.04333					0.706116
6.14333					0.706101
6.24333					0.711588
6.34333					0.714222
6.44333					0.717543
6.54333					0.71852
6.64333					0.718657
6.74333					0.720332
6.84333					0.720186
6.94333					0.720074
7.04333					0.722414
7.14333					0.725224
7.24333					0.726633
7.34333					0.728162
7.44333					0.726071
7.54333					0.725224
7.64333					0.729583
7.74333					0.73056
7.84333					0.7332
7.94333					0.731325
8.04333					0.733255
8.14333					0.733279
8.24333					0.733458
8.34333					0.732639
8.44333					0.730208
8.54333					0.735285
8.64333					0.732596
8.74333					0.736615
8.84333					0.731656
8.94333					0.734645
9.04333					0.739319
9.14333					0.73575
9.24333					0.737079
9.34333					0.733753
9.44333					0.735738
9.54333					0.738111
9.64333					0.737091
9.74333					0.738226
9.84333					0.737091
9.94333					0.741513
10.0433					0.739717
10.1433					0.739116
10.2433					0.737146
10.3433					0.740399
10.4433					0.740226
10.5433					0.739012
10.6433					0.738305
10.7433					0.73928
10.8433					0.739486
10.9433					0.736867
11.0433					0.73978
11.1433					0.743586
11.2433					0.742521
11.3433					0.739392
11.4433					0.73904
11.5433					0.743944
11.6433					0.741589
11.7433					0.733898
11.8433					0.736751
11.9433					0.736487
12.0433					0.736059
12.1433					0.739914
12.2433					0.738676
12.3433					0.735501
12.4433					0.744685
12.5433					0.738229
12.6433					0.737128
12.7433					0.739352
12.8433					0.736509
12.9433					0.736706
13.0433					0.735726
13.1433					0.737717
13.2433					0.735647
13.3433					0.735
13.4433					0.739468
13.5433					0.736663
13.6433					0.736994
13.7433					0.732924
13.8433					0.732618
13.9433					0.735322
14.0433					0.732011
14.1433					0.738761
14.2433					0.733118
14.3433					0.73324
14.4433					0.737726
14.5433					0.737616
14.6433					0.730475
14.7433					0.732354
14.8433					0.734645
14.9433					0.732891
15.0433					0.730666
15.1433					0.736994
15.2433					0.73239
15.3433					0.728784
15.4433					0.729549
15.5433					0.727692
15.6433					0.727164
15.7433					0.733716
15.8433					0.730223
15.9433					0.726839
16.0433					0.724781
16.1433					0.73337
16.2433					0.727577
16.3433					0.72629
16.4433					0.72412
16.5433					0.725294
16.6433					0.727592
16.7433					0.724104
16.8433					0.727246
16.9433					0.726026
17.0433					0.724836
17.1433					0.730138
17.2433					0.723009
17.3433					0.725203
17.4433					0.723006
17.5433					0.722672
17.6433					0.723549
17.7433					0.723567
17.8433					0.724505
17.9433					0.725616
18.0433					0.721516
18.1433					0.723813
18.2433					0.722314
18.3433					0.721959
18.4433					0.719045
18.5433					0.721242
18.6433					0.720305
18.7433					0.724587
18.8433					0.719628
18.9433					0.719148
19.0433					0.719009
19.1433					0.716951
19.2433					0.719427
19.3433					0.719707
19.4433					0.717877
19.5433					0.715922
19.6433					0.716833
19.7433					0.71292
19.8433					0.720739
19.9433					0.712899
20.0433					0.712453
20.1433					0.714845
20.2433					0.715163
20.3433					0.715242
20.4433					0.715694
20.5433					0.712444
20.6433					0.712453
20.7433					0.714277
20.8433					0.714781
20.9433					0.712241
21.0433					0.713591
21.1433					0.712936
21.2433					0.7098
21.3433					0.710857
21.4433					0.712083
21.5433					0.708811
21.6433					0.708055
21.7433					0.709072
21.8433					0.706659
21.9433					0.704947
22.0433					0.706316
22.1433					0.708061
22.2433					0.71025
22.3433					0.708659
22.4433					0.705791
22.5433					0.704823
22.6433					0.708941
22.7433					0.705184
22.8433					0.706371
22.9433					0.705685
23.0433					0.704274
23.1433					0.702571
23.2433					0.702146
23.3433					0.705133
23.4433					0.705961
23.5433					0.69943
23.6433					0.701797
23.7433					0.701481
23.8433					0.695417
23.9433					0.70129
24.0433					0.700428
24.1433					0.699357
24.2433					0.692552
24.3433					0.698565
24.4433					0.705897
24.5433					0.6981
24.6433					0.698604
24.7433					0.695882
24.8433					0.699548
24.9433					0.698386
25.0433					0.693448
25.1433					0.694231
25.2433					0.695433
25.3433					0.69258
25.4433					0.695542
25.5433					0.694898
25.6433					0.695678
25.7433					0.694237
25.8433					0.688425
25.9433					0.694373
26.0433					0.691259
26.1433					0.692741
26.2433					0.692768
26.3433					0.69034
26.4433					0.688792
26.5433					0.687699
26.6433					0.691171
26.7433					0.69007
26.8433					0.688203
26.9433					0.688668
27.0433					0.689314
27.1433					0.68603
27.2433					0.688048
27.3433					0.68274
27.4433					0.689514
27.5433					0.686798
27.6433					0.683104
27.7433					0.682883
27.8433					0.684807
27.9433					0.687299
28.0433					0.684182
28.1433					0.684033
28.2433					0.678649
28.3433					0.681672
28.4433					0.683247
28.5433					0.680616
28.6433					0.68328
28.7433					0.6844
28.8433					0.6806
28.9433					0.680792
29.0433					0.683432
29.1433					0.677362
29.2433					0.677584
29.3433					0.674294
29.4433					0.676658
29.5433					0.67688
29.6433					0.675459
29.7433					0.673905
29.8433					0.677672
29.9433					0.678036
30.0433					0.671313
0.128888						0.046876
0.228888						0.086046
0.328888						0.120791
0.428888						0.155912
0.528888						0.188848
0.628888						0.218959
0.728888						0.248644
0.828888						0.272806
0.928888						0.292218
1.02889						0.309168
1.12889						0.325949
1.22889						0.333522
1.32889						0.346621
1.42889						0.354123
1.52889						0.360603
1.62889						0.367811
1.72889						0.374786
1.82889						0.381068
1.92889						0.38976
2.02889						0.396346
2.12889						0.398386
2.22889						0.405734
2.32889						0.412241
2.42889						0.418517
2.52889						0.423625
2.62889						0.427771
2.72889						0.437741
2.82889						0.438597
2.92889						0.445869
3.02889						0.448664
3.12889						0.458841
3.22889						0.462407
3.32889						0.466568
3.42889						0.467958
3.52889						0.473727
3.62889						0.482241
3.72889						0.48693
3.82889						0.488374
3.92889						0.490547
4.02889						0.499795
4.12889						0.505161
4.22889						0.50843
4.32889						0.512032
4.42889						0.51775
4.52889						0.519635
4.62889						0.525456
4.72889						0.525751
4.82889						0.533111
4.92889						0.535017
5.02889						0.539508
5.12889						0.542052
5.22889						0.546022
5.32889						0.548607
5.42889						0.550705
5.52889						0.554902
5.62889						0.561109
5.72889						0.562556
5.82889						0.562596
5.92889						0.570639
6.02889						0.568872
6.12889						0.570453
6.22889						0.573795
6.32889						0.578639
6.42889						0.580156
6.52889						0.583407
6.62889						0.586748
6.72889						0.58833
6.82889						0.590454
6.92889						0.59152
7.02889						0.597659
7.12889						0.597775
7.22889						0.598916
7.32889						0.599128
7.42889						0.601575
7.52889						0.605004
7.62889						0.604509
7.72889						0.607092
7.82889						0.611806
7.92889						0.608853
8.02889						0.612224
8.12889						0.610604
8.22889						0.61197
8.32889						0.614161
8.42889						0.618813
8.52889						0.622298
8.62889						0.619223
8.72889						0.618401
8.82889						0.626647
8.92889						0.622698
9.02889						0.622246
9.12889						0.625679
9.22889						0.626862
9.32889						0.62726
9.42889						0.629697
9.52889						0.627445
9.62889						0.625621
9.72889						0.635069
9.82889						0.634653
9.92889						0.635527
10.0289						0.635424
10.1289						0.636556
10.2289						0.634432
10.3289						0.636632
10.4289						0.638656
10.5289						0.637239
10.6289						0.638814
10.7289						0.640745
10.8289						0.636829
10.9289						0.642714
11.0289						0.643761
11.1289						0.64357
11.2289						0.641728
11.3289						0.644177
11.4289						0.645373
11.5289						0.643464
11.6289						0.642863
11.7289						0.642411
11.8289						0.64771
11.9289						0.646044
12.0289						0.646174
12.1289						0.646982
12.2289						0.647285
12.3289						0.644566
12.4289						0.650168
12.5289						0.651437
12.6289						0.647385
12.7289						0.646499
12.8289						0.649789
12.9289						0.65019
13.0289						0.650259
13.1289						0.654803
13.2289						0.649938
13.3289						0.651455
13.4289						0.651756
13.5289						0.652211
13.6289						0.64971
13.7289						0.652153
13.8289						0.655307
13.9289						0.653822
14.0289						0.655073
14.1289						0.653398
14.2289						0.652954
14.3289						0.652909
14.4289						0.651106
14.5289						0.650126
14.6289						0.651574
14.7289						0.654217
14.8289						0.654117
14.9289						0.655744
15.0289						0.654138
15.1289						0.655422
15.2289						0.659638
15.3289						0.65812
15.4289						0.654854
15.5289						0.653622
15.6289						0.65666
15.7289						0.655616
15.8289						0.657222
15.9289						0.656533
16.0289						0.653786
16.1289						0.657756
16.2289						0.656175
16.3289						0.652408
16.4289						0.654912
16.5289						0.652866
16.6289						0.657783
16.7289						0.653986
16.8289						0.655653
16.9289						0.652751
17.0289						0.649649
17.1289						0.65392
17.2289						0.650894
17.3289						0.652557
17.4289						0.655188
17.5289						0.654102
17.6289						0.651719
17.7289						0.660114
17.8289						0.653316
17.9289						0.65534
18.0289						0.65364
18.1289						0.655747
18.2289						0.649819
18.3289						0.653419
18.4289						0.65442
18.5289						0.653215
18.6289						0.649115
18.7289						0.653486
18.8289						0.649907
18.9289						0.65473
19.0289						0.651689
19.1289						0.653947
19.2289						0.653516
19.3289						0.650038
19.4289						0.655413
19.5289						0.647807
19.6289						0.650584
19.7289						0.645658
19.8289						0.653461
19.9289						0.648851
20.0289						0.653795
20.1289						0.652657
20.2289						0.650775
20.3289						0.653543
20.4289						0.65097
20.5289						0.65124
20.6289						0.647962
20.7289						0.647085
20.8289						0.647416
20.9289						0.652177
21.0289						0.645601
21.1289						0.647267
21.2289						0.646805
21.3289						0.648353
21.4289						0.645249
21.5289						0.643746
21.6289						0.647246
21.7289						0.645391
21.8289						0.646447
21.9289						0.64377
22.0289						0.645321
22.1289						0.645118
22.2289						0.64238
22.3289						0.645834
22.4289						0.6469
22.5289						0.648041
22.6289						0.64493
22.7289						0.646265
22.8289						0.640796
22.9289						0.642314
23.0289						0.641288
23.1289						0.643558
23.2289						0.641515
23.3289						0.643376
23.4289						0.641534
23.5289						0.639883
23.6289						0.642848
23.7289						0.642508
23.8289						0.642323
23.9289						0.638845
24.0289						0.63696
24.1289						0.640113
24.2289						0.638605
24.3289						0.639136
24.4289						0.64072
24.5289						0.637075
24.6289						0.635348
24.7289						0.637573
24.8289						0.638359
24.9289						0.642113
25.0289						0.640848
25.1289						0.637233
25.2289						0.638398
25.3289						0.637606
25.4289						0.637011
25.5289						0.635831
25.6289						0.633688
25.7289						0.634829
25.8289						0.63353
25.9289						0.631934
26.0289						0.634838
26.1289						0.633612
26.2289						0.631491
26.3289						0.633251
26.4289						0.628401
26.5289						0.634565
26.6289						0.63031
26.7289						0.630122
26.8289						0.627554
26.9289						0.62933
27.0289						0.628371
27.1289						0.629715
27.2289						0.626829
27.3289						0.628875
27.4289						0.626034
27.5289						0.627093
27.6289						0.626356
27.7289						0.627078
27.8289						0.62662
27.9289						0.624204
28.0289						0.626179
28.1289						0.626516
28.2289						0.626158
28.3289						0.626034
28.4289						0.624146
28.5289						0.627651
28.6289						0.622307
28.7289						0.623257
28.8289						0.622367
28.9289						0.621852
29.0289						0.623478
29.1289						0.621651
29.2289						0.626179
29.3289						0.619281
29.4289						0.618877
29.5289						0.619806
29.6289						0.617229
29.7289						0.619936
29.8289						0.616568
29.9289						0.617596
30.0289						0.616328
0.114444							0.018802
0.214444							0.040296
0.314444							0.076816
0.414444							0.125993
0.514444							0.186845
0.614444							0.245133
0.714444							0.310483
0.814444							0.364703
0.914444							0.417998
1.01444							0.46739
1.11444							0.503152
1.21444							0.543272
1.31444							0.582484
1.41444							0.610583
1.51444							0.643197
1.61444							0.671996
1.71444							0.695372
1.81444							0.720302
1.91444							0.738084
2.01444							0.764762
2.11444							0.785955
2.21444							0.802117
2.31444							0.828964
2.41444							0.839013
2.51444							0.861594
2.61444							0.875024
2.71444							0.892412
2.81444							0.904206
2.91444							0.917056
3.01444							0.933072
3.11444							0.948298
3.21444							0.961401
3.31444							0.969589
3.41444							0.984913
3.51444							0.993696
3.61444							1.00568
3.71444							1.01688
3.81444							1.02616
3.91444							1.03884
4.01444							1.04754
4.11444							1.06191
4.21444							1.06613
4.31444							1.06917
4.41444							1.07953
4.51444							1.08818
4.61444							1.09775
4.71444							1.10226
4.81444							1.10353
4.91444							1.11837
5.01444							1.12224
5.11444							1.12753
5.21444							1.13569
5.31444							1.13647
5.41444							1.14911
5.51444							1.15345
5.61444							1.15232
5.71444							1.16457
5.81444							1.16443
5.91444							1.17108
6.01444							1.17804
6.11444							1.1774
6.21444							1.18446
6.31444							1.18738
6.41444							1.18827
6.51444							1.1999
6.61444							1.19229
6.71444							1.1974
6.81444							1.20655
6.91444							1.20883
7.01444							1.21086
7.11444							1.20978
7.21444							1.2193
7.31444							1.22045
7.41444							1.22122
7.51444							1.21739
7.61444							1.22616
7.71444							1.22784
7.81444							1.22728
7.91444							1.22882
8.01444							1.23333
8.11444							1.23629
8.21444							1.23719
8.31444							1.23557
8.41444							1.23989
8.51444							1.2403
8.61444							1.24392
8.71444							1.24505
8.81444							1.24419
8.91444							1.24617
9.01444							1.24658
9.11444							1.24807
9.21444							1.24728
9.31444							1.24973
9.41444							1.24878
9.51444							1.25153
9.61444							1.2567
9.71444							1.24916
9.81444							1.25338
9.91444							1.25584
10.0144							1.2526
10.1144							1.25436
10.2144							1.25402
10.3144							1.25162
10.4144							1.25537
10.5144							1.25579
10.6144							1.25728
10.7144							1.2553
10.8144							1.25684
10.9144							1.2569
11.0144							1.25318
11.1144							1.25887
11.2144							1.25582
11.3144							1.25625
11.4144							1.25836
11.5144							1.25431
11.6144							1.25534
11.7144							1.25564
11.8144							1.26175
11.9144							1.25391
12.0144							1.25298
12.1144							1.25792
12.2144							1.25459
12.3144							1.25232
12.4144							1.25303
12.5144							1.25568
12.6144							1.26262
12.7144							1.2512
12.8144							1.25231
12.9144							1.24983
13.0144							1.25202
13.1144							1.24926
13.2144							1.25199
13.3144							1.25579
13.4144							1.24931
13.5144							1.24874
13.6144							1.24756
13.7144							1.25461
13.8144							1.24672
13.9144							1.2466
14.0144							1.24602
14.1144							1.24928
14.2144							1.24433
14.3144							1.24606
14.4144							1.243
14.5144							1.24583
14.6144							1.24339
14.7144							1.24476
14.8144							1.24006
14.9144							1.2447
15.0144							1.24243
15.1144							1.24063
15.2144							1.24073
15.3144							1.23907
15.4144							1.23637
15.5144							1.2374
15.6144							1.23137
15.7144							1.23332
15.8144							1.23319
15.9144							1.23573
16.0144							1.23268
16.1144							1.2251
16.2144							1.22996
16.3144							1.2282
16.4144							1.23075
16.5144							1.22757
16.6144							1.22936
16.7144							1.22226
16.8144							1.22326
16.9144							1.22202
17.0144							1.2234
17.1144							1.22632
17.2144							1.22262
17.3144							1.21926
17.4144							1.21797
17.5144							1.21995
17.6144							1.21934
17.7144							1.21679
17.8144							1.21739
17.9144							1.20839
18.0144							1.2133
18.1144							1.20978
18.2144							1.21395
18.3144							1.21443
18.4144							1.21252
18.5144							1.20947
18.6144							1.20791
18.7144							1.20823
18.8144							1.20212
18.9144							1.20284
19.0144							1.20683
19.1144							1.20135
19.2144							1.19775
19.3144							1.20039
19.4144							1.20326
19.5144							1.19942
19.6144							1.19937
19.7144							1.19474
19.8144							1.19445
19.9144							1.19492
[truncated: 2,801 more rows]

## Sheet: primary data -+val n=1
time	native	+8pos	+8neg	-8pos	-8neg	-17neg	-13pos	native +val	+8pos +val	+8neg +val	-8pos +val	-8neg +val	-17neg +val	-13pos +val
0.316667	0.075935
0.416667	0.113424
0.516667	0.154599
0.616667	0.199447
0.716667	0.241252
0.816667	0.286413
0.916667	0.319934
1.01667	0.355224
1.11667	0.388642
1.21667	0.415384
1.31667	0.442678
1.41667	0.466481
1.51667	0.484476
1.61667	0.504962
1.71667	0.522388
1.81667	0.544842
1.91667	0.559987
2.01667	0.575029
2.11667	0.593277
2.21667	0.607543
2.31667	0.61819
2.41667	0.636816
2.51667	0.646114
2.61667	0.658565
2.71667	0.671539
2.81667	0.687841
2.91667	0.689983
3.01667	0.69958
3.11667	0.71137
3.21667	0.721956
3.31667	0.731276
3.41667	0.743731
3.51667	0.751111
3.61667	0.756307
3.71667	0.765302
3.81667	0.770377
3.91667	0.77864
4.01667	0.784259
4.11667	0.7956
4.21667	0.804126
4.31667	0.812556
4.41667	0.817104
4.51667	0.823441
4.61667	0.824487
4.71667	0.833249
4.81667	0.840561
4.91667	0.843109
5.01667	0.847924
5.11667	0.851183
5.21667	0.859119
5.31667	0.86388
5.41667	0.872378
5.51667	0.879641
5.61667	0.874783
5.71667	0.884897
5.81667	0.884939
5.91667	0.891049
6.01667	0.893053
6.11667	0.893131
6.21667	0.901814
6.31667	0.908614
6.41667	0.90702
6.51667	0.912923
6.61667	0.918834
6.71667	0.914817
6.81667	0.913596
6.91667	0.918919
7.01667	0.92599
7.11667	0.932317
7.21667	0.930072
7.31667	0.932509
7.41667	0.935936
7.51667	0.940456
7.61667	0.937235
7.71667	0.941762
7.81667	0.947398
7.91667	0.94732
8.01667	0.947537
8.11667	0.951761
8.21667	0.950131
8.31667	0.948889
8.41667	0.955864
8.51667	0.95897
8.61667	0.960091
8.71667	0.959515
8.81667	0.960533
8.91667	0.967216
9.01667	0.962942
9.11667	0.963924
9.21667	0.968831
9.31667	0.96213
9.41667	0.972165
9.51667	0.978884
9.61667	0.967856
9.71667	0.969489
9.81667	0.975727
9.91667	0.971109
10.0167	0.975585
10.1167	0.977806
10.2167	0.984983
10.3167	0.983481
10.4167	0.979991
10.5167	0.982901
10.6167	0.981446
10.7167	0.983029
10.8167	0.98056
10.9167	0.981631
11.0167	0.978994
11.1167	0.983097
11.2167	0.98699
11.3167	0.987705
11.4167	0.983339
11.5167	0.992186
11.6167	0.989104
11.7167	0.98783
11.8167	0.99437
11.9167	0.983891
12.0167	0.988954
12.1167	0.98825
12.2167	0.988524
12.3167	0.986243
12.4167	0.986001
12.5167	0.989734
12.6167	0.993645
12.7167	0.994047
12.8167	0.997609
12.9167	0.992164
13.0167	0.995281
13.1167	0.990378
13.2167	0.994684
13.3167	1
13.4167	0.994406
13.5167	0.993776
13.6167	0.992904
13.7167	0.996249
13.8167	0.993637
13.9167	0.989915
14.0167	0.99478
14.1167	0.989709
14.2167	0.991783
14.3167	0.998103
14.4167	0.994548
14.5167	0.991114
14.6167	0.993175
14.7167	0.992452
14.8167	0.988406
14.9167	0.988702
15.0167	0.992776
15.1167	0.994015
15.2167	0.992438
15.3167	0.991257
15.4167	0.99442
15.5167	0.988214
15.6167	0.993477
15.7167	0.995787
15.8167	0.990481
15.9167	0.991598
16.0167	0.993114
16.1167	0.990349
16.2167	0.988805
16.3167	0.994805
16.4167	0.994328
16.5167	0.993627
16.6167	0.985823
16.7167	0.994139
16.8167	0.987061
16.9167	0.990848
17.0167	0.987883
17.1167	0.988015
17.2167	0.987787
17.3167	0.989748
17.4167	0.985535
17.5167	0.987844
17.6167	0.98831
17.7167	0.985012
17.8167	0.991289
17.9167	0.983869
18.0167	0.991086
18.1167	0.982307
18.2167	0.982841
18.3167	0.98852
18.4167	0.990812
18.5167	0.983428
18.6167	0.978873
18.7167	0.987666
18.8167	0.985328
18.9167	0.983674
19.0167	0.979428
19.1167	0.981741
19.2167	0.984481
19.3167	0.981129
19.4167	0.983844
19.5167	0.982592
19.6167	0.981595
19.7167	0.983236
19.8167	0.981624
19.9167	0.976802
20.0167	0.982321
20.1167	0.982869
20.2167	0.977927
20.3167	0.976578
20.4167	0.982474
20.5167	0.983311
20.6167	0.9735
20.7167	0.975318
20.8167	0.979706
20.9167	0.974585
21.0167	0.977603
21.1167	0.974774
21.2167	0.9785
21.3167	0.972603
21.4167	0.973567
21.5167	0.977062
21.6167	0.973454
21.7167	0.971931
21.8167	0.974425
21.9167	0.972906
22.0167	0.96992
22.1167	0.976197
22.2167	0.969561
22.3167	0.971105
22.4167	0.969151
22.5167	0.970884
22.6167	0.966796
22.7167	0.972044
22.8167	0.971948
22.9167	0.968393
23.0167	0.9645
23.1167	0.963073
23.2167	0.96955
23.3167	0.960284
23.4167	0.9696
23.5167	0.961796
23.6167	0.963497
23.7167	0.962102
23.8167	0.961316
23.9167	0.961134
24.0167	0.963806
24.1167	0.961202
24.2167	0.962678
24.3167	0.956376
24.4167	0.960735
24.5167	0.962611
24.6167	0.955974
24.7167	0.959052
24.8167	0.959604
24.9167	0.95781
25.0167	0.956309
25.1167	0.958447
25.2167	0.958551
25.3167	0.951772
25.4167	0.961689
25.5167	0.955013
25.6167	0.956689
25.7167	0.952583
25.8167	0.953896
25.9167	0.951982
26.0167	0.95343
26.1167	0.955373
26.2167	0.953142
26.3167	0.949612
26.4167	0.951857
26.5167	0.949665
26.6167	0.945929
26.7167	0.946509
26.8167	0.947021
26.9167	0.952302
27.0167	0.945455
27.1167	0.945103
27.2167	0.945074
27.3167	0.947092
27.4167	0.947605
27.5167	0.94416
27.6167	0.939683
27.7167	0.941662
27.8167	0.943406
27.9167	0.939648
28.0167	0.944911
28.1167	0.938968
28.2167	0.94269
28.3167	0.940043
28.4167	0.944356
28.5167	0.936573
28.6167	0.936673
28.7167	0.939281
28.8167	0.93357
28.9167	0.934235
29.0167	0.937886
29.1167	0.936086
29.2167	0.936694
29.3167	0.937573
29.4167	0.930993
29.5167	0.929431
29.6167	0.933025
29.7167	0.935979
29.8167	0.930058
29.9167	0.933876
30.0167	0.925314
30.1167	0.933776
30.2167	0.930175
0.302222		0.076099
0.402222		0.101328
0.502222		0.12226
0.602222		0.145799
0.702222		0.168805
0.802222		0.19038
0.902222		0.213268
1.00222		0.231691
1.10222		0.251999
1.20222		0.272492
1.30222		0.288755
1.40222		0.308661
1.50222		0.328663
1.60222		0.341606
1.70222		0.360327
1.80222		0.377137
1.90222		0.390642
2.00222		0.406388
2.10222		0.423914
2.20222		0.437621
2.30222		0.448279
2.40222		0.463812
2.50222		0.47584
2.60222		0.489472
2.70222		0.504133
2.80222		0.516161
2.90222		0.527676
3.00222		0.535185
3.10222		0.553265
3.20222		0.562119
3.30222		0.567403
3.40222		0.583908
3.50222		0.591523
3.60222		0.600028
3.70222		0.607469
3.80222		0.621859
3.90222		0.629175
4.00222		0.637712
4.10222		0.647199
4.20222		0.654644
4.30222		0.657793
4.40222		0.669806
4.50222		0.677756
4.60222		0.680482
4.70222		0.691389
4.80222		0.695495
4.90222		0.69921
5.00222		0.707918
5.10222		0.716718
5.20222		0.718046
5.30222		0.722394
5.40222		0.72981
5.50222		0.727856
5.60222		0.739439
5.70222		0.742603
5.80222		0.745738
5.90222		0.749335
6.00222		0.754193
6.10222		0.758748
6.20222		0.762602
6.30222		0.768715
6.40222		0.76774
6.50222		0.775231
6.60222		0.774665
6.70222		0.778152
6.80222		0.782063
6.90222		0.786657
7.00222		0.787333
7.10222		0.78987
7.20222		0.790269
7.30222		0.794493
7.40222		0.795393
7.50222		0.799802
7.60222		0.801265
7.70222		0.803934
7.80222		0.805143
7.90222		0.810058
8.00222		0.810236
8.10222		0.815808
8.20222		0.814741
8.30222		0.817573
8.40222		0.825498
8.50222		0.818826
8.60222		0.825978
8.70222		0.818936
8.80222		0.828338
8.90222		0.830736
9.00222		0.83175
9.10222		0.83127
9.20222		0.833732
9.30222		0.830174
9.40222		0.837572
9.50222		0.834184
9.60222		0.839593
9.70222		0.842593
9.80222		0.841825
9.90222		0.843678
10.0022		0.846184
10.1022		0.846693
10.2022		0.843422
10.3022		0.848276
10.4022		0.845045
10.5022		0.847507
10.6022		0.848828
10.7022		0.859813
10.8022		0.854589
10.9022		0.854012
11.0022		0.851155
11.1022		0.853596
11.2022		0.855941
11.3022		0.852454
11.4022		0.863958
11.5022		0.857083
11.6022		0.858663
11.7022		0.85592
11.8022		0.861756
11.9022		0.860941
12.0022		0.862976
12.1022		0.864154
12.2022		0.859169
12.3022		0.865723
12.4022		0.86493
12.5022		0.862421
12.6022		0.866955
12.7022		0.867193
12.8022		0.862702
12.9022		0.866115
13.0022		0.865467
13.1022		0.867311
13.2022		0.865748
13.3022		0.86551
13.4022		0.866777
13.5022		0.869976
13.6022		0.865912
13.7022		0.869919
13.8022		0.869862
13.9022		0.872129
14.0022		0.868727
14.1022		0.871285
14.2022		0.870435
14.3022		0.872937
14.4022		0.874609
14.5022		0.871552
14.6022		0.870285
14.7022		0.873079
14.8022		0.875146
14.9022		0.873388
15.0022		0.873744
15.1022		0.872399
15.2022		0.87047
15.3022		0.87357
15.4022		0.875684
15.5022		0.872246
15.6022		0.875079
15.7022		0.874826
15.8022		0.871805
15.9022		0.866172
16.0022		0.875712
16.1022		0.871641
16.2022		0.870556
16.3022		0.870816
16.4022		0.872068
16.5022		0.871296
16.6022		0.877509
16.7022		0.871421
16.8022		0.867873
16.9022		0.867812
17.0022		0.871808
17.1022		0.873107
17.2022		0.875915
17.3022		0.869826
17.4022		0.869794
17.5022		0.875452
17.6022		0.872542
17.7022		0.868784
17.8022		0.873082
17.9022		0.873346
18.0022		0.868794
18.1022		0.870962
18.2022		0.869282
18.3022		0.870068
18.4022		0.879118
18.5022		0.873488
18.6022		0.871182
18.7022		0.874581
18.8022		0.867869
18.9022		0.871969
19.0022		0.865346
19.1022		0.872307
19.2022		0.866325
19.3022		0.866545
19.4022		0.870125
19.5022		0.864812
19.6022		0.865997
19.7022		0.870257
19.8022		0.868649
19.9022		0.868371
20.0022		0.863585
20.1022		0.865336
20.2022		0.864894
20.3022		0.87088
20.4022		0.867862
20.5022		0.868221
20.6022		0.866873
20.7022		0.86283
20.8022		0.86208
20.9022		0.859788
21.0022		0.862585
21.1022		0.864019
21.2022		0.861955
21.3022		0.868848
21.4022		0.860788
21.5022		0.86372
21.6022		0.864193
21.7022		0.860403
21.8022		0.859987
21.9022		0.857048
22.0022		0.858485
22.1022		0.864606
22.2022		0.862934
22.3022		0.859713
22.4022		0.863339
22.5022		0.857482
22.6022		0.858713
22.7022		0.858286
22.8022		0.861948
22.9022		0.855649
23.0022		0.860428
23.1022		0.857521
23.2022		0.853788
23.3022		0.85302
23.4022		0.854521
23.5022		0.854689
23.6022		0.849454
23.7022		0.855599
23.8022		0.852852
23.9022		0.852827
24.0022		0.850301
24.1022		0.855219
24.2022		0.852383
24.3022		0.851561
24.4022		0.852322
24.5022		0.850304
24.6022		0.850354
24.7022		0.845351
24.8022		0.850934
24.9022		0.852276
25.0022		0.849458
25.1022		0.850361
25.2022		0.845846
25.3022		0.850347
25.4022		0.847507
25.5022		0.852674
25.6022		0.843483
25.7022		0.84012
25.8022		0.843469
25.9022		0.846344
26.0022		0.841027
26.1022		0.841412
26.2022		0.842212
26.3022		0.840743
26.4022		0.843077
26.5022		0.84117
26.6022		0.839775
26.7022		0.838298
26.8022		0.837295
26.9022		0.844365
27.0022		0.840999
27.1022		0.838565
27.2022		0.835611
27.3022		0.833526
27.4022		0.838601
27.5022		0.832676
27.6022		0.83101
27.7022		0.835775
27.8022		0.835366
27.9022		0.831049
28.0022		0.832594
28.1022		0.834643
28.2022		0.832124
28.3022		0.834003
28.4022		0.834807
28.5022		0.829904
28.6022		0.832177
28.7022		0.830996
28.8022		0.82853
28.9022		0.828452
29.0022		0.830331
29.1022		0.828907
29.2022		0.818043
29.3022		0.826107
29.4022		0.828509
29.5022		0.827213
29.6022		0.823512
29.7022		0.82568
29.8022		0.820103
29.9022		0.823438
30.0022		0.820577
30.1022		0.824363
30.2022		0.819958
0.287778			0.029941
0.387778			0.037453
0.487778			0.048741
0.587778			0.062185
0.687778			0.078134
0.787778			0.096147
0.887778			0.115801
0.987778			0.138426
1.08778			0.161076
1.18778			0.183633
1.28778			0.207429
1.38778			0.23315
1.48778			0.256166
1.58778			0.282702
1.68778			0.310323
1.78778			0.332126
1.88778			0.358971
1.98778			0.379966
2.08778			0.402751
2.18778			0.42565
2.28778			0.448489
2.38778			0.467915
2.48778			0.48939
2.58778			0.508951
2.68778			0.526392
2.78778			0.5476
2.88778			0.565126
2.98778			0.584957
3.08778			0.597177
3.18778			0.61619
3.28778			0.627528
3.38778			0.643669
3.48778			0.656562
3.58778			0.675023
3.68778			0.689489
3.78778			0.70368
3.88778			0.712384
3.98778			0.725853
4.08778			0.739589
4.18778			0.748143
4.28778			0.760673
4.38778			0.774807
4.48778			0.786041
4.58778			0.795407
4.68778			0.802827
4.78778			0.816979
4.88778			0.827206
4.98778			0.835875
5.08778			0.843372
5.18778			0.853806
5.28778			0.864296
5.38778			0.870246
5.48778			0.881367
5.58778			0.889669
5.68778			0.891142
5.78778			0.90118
5.88778			0.906806
5.98778			0.918991
6.08778			0.925104
6.18778			0.929951
6.28778			0.936442
6.38778			0.941943
6.48778			0.955408
6.58778			0.954867
6.68778			0.964593
6.78778			0.97482
6.88778			0.974219
6.98778			0.977492
7.08778			0.982165
7.18778			0.992691
7.28778			0.996925
7.38778			0.998164
7.48778			1.00864
7.58778			1.01074
7.68778			1.01965
7.78778			1.02723
7.88778			1.03363
7.98778			1.03096
8.08778			1.03491
8.18778			1.03647
8.28778			1.04414
8.38778			1.0481
8.48778			1.0561
8.58778			1.0646
8.68778			1.06282
8.78778			1.06891
8.88778			1.07132
8.98778			1.07946
9.08778			1.07597
9.18778			1.08354
9.28778			1.08507
9.38778			1.09077
9.48778			1.09494
9.58778			1.09085
9.68778			1.09868
9.78778			1.10243
9.88778			1.10242
9.98778			1.10276
10.0878			1.10838
10.1878			1.12085
10.2878			1.12273
10.3878			1.12096
10.4878			1.123
10.5878			1.12162
10.6878			1.13192
10.7878			1.13129
10.8878			1.12852
10.9878			1.13876
11.0878			1.13231
11.1878			1.13739
11.2878			1.13348
11.3878			1.14476
11.4878			1.14625
11.5878			1.14637
11.6878			1.15005
11.7878			1.15313
11.8878			1.14839
11.9878			1.15639
12.0878			1.15612
12.1878			1.16104
12.2878			1.16149
12.3878			1.15462
12.4878			1.1702
12.5878			1.16562
12.6878			1.16518
12.7878			1.17032
12.8878			1.16336
12.9878			1.16657
13.0878			1.16911
13.1878			1.16392
13.2878			1.16869
13.3878			1.17804
13.4878			1.17431
13.5878			1.17595
13.6878			1.17766
13.7878			1.1728
13.8878			1.17588
13.9878			1.17902
14.0878			1.18792
14.1878			1.18472
14.2878			1.18541
14.3878			1.18326
14.4878			1.18524
14.5878			1.18529
14.6878			1.1887
14.7878			1.18754
14.8878			1.18325
14.9878			1.18803
15.0878			1.1905
15.1878			1.1871
15.2878			1.18967
15.3878			1.1881
15.4878			1.19186
15.5878			1.19446
15.6878			1.19223
15.7878			1.19717
15.8878			1.19421
15.9878			1.19366
16.0878			1.19239
16.1878			1.1928
16.2878			1.19449
16.3878			1.19584
16.4878			1.19595
16.5878			1.19437
16.6878			1.19662
16.7878			1.19732
16.8878			1.19448
16.9878			1.19071
17.0878			1.20015
17.1878			1.20177
17.2878			1.19783
17.3878			1.19324
17.4878			1.20044
17.5878			1.20067
17.6878			1.19712
17.7878			1.19712
17.8878			1.20226
17.9878			1.19651
18.0878			1.20093
18.1878			1.19541
18.2878			1.20145
18.3878			1.20334
18.4878			1.19738
18.5878			1.1973
18.6878			1.19447
18.7878			1.19817
18.8878			1.19249
18.9878			1.19419
19.0878			1.19467
19.1878			1.19609
19.2878			1.20116
19.3878			1.20117
19.4878			1.19583
19.5878			1.20251
19.6878			1.19612
19.7878			1.20039
19.8878			1.19416
19.9878			1.19487
20.0878			1.19787
20.1878			1.19799
20.2878			1.19765
20.3878			1.18887
20.4878			1.19043
20.5878			1.19571
20.6878			1.19229
20.7878			1.18548
20.8878			1.19544
20.9878			1.19454
21.0878			1.19088
21.1878			1.1952
21.2878			1.19258
21.3878			1.18963
21.4878			1.18655
21.5878			1.19274
21.6878			1.19601
21.7878			1.18605
21.8878			1.1809
21.9878			1.18692
22.0878			1.19137
22.1878			1.18523
22.2878			1.18891
22.3878			1.18228
22.4878			1.18749
22.5878			1.1884
22.6878			1.18894
22.7878			1.18485
22.8878			1.18341
22.9878			1.18412
23.0878			1.18789
23.1878			1.18241
23.2878			1.18671
23.3878			1.18008
23.4878			1.18321
23.5878			1.17859
23.6878			1.17936
23.7878			1.17826
23.8878			1.18032
23.9878			1.17547
24.0878			1.17611
24.1878			1.17308
24.2878			1.17757
24.3878			1.17906
24.4878			1.17841
24.5878			1.16866
24.6878			1.16432
24.7878			1.16984
24.8878			1.17328
24.9878			1.16996
25.0878			1.16512
25.1878			1.17359
25.2878			1.17074
25.3878			1.1684
25.4878			1.16614
25.5878			1.16237
25.6878			1.17011
25.7878			1.16781
25.8878			1.15858
25.9878			1.16511
26.0878			1.16295
26.1878			1.16792
26.2878			1.16082
26.3878			1.15863
26.4878			1.15538
26.5878			1.1603
26.6878			1.15646
26.7878			1.16067
26.8878			1.15903
26.9878			1.15787
27.0878			1.15936
27.1878			1.15999
27.2878			1.16014
27.3878			1.15657
27.4878			1.14978
27.5878			1.14989
27.6878			1.15522
27.7878			1.15033
27.8878			1.15088
27.9878			1.15243
28.0878			1.15099
28.1878			1.1557
28.2878			1.1453
28.3878			1.1469
28.4878			1.15183
28.5878			1.14742
28.6878			1.14113
28.7878			1.14676
28.8878			1.1417
28.9878			1.13854
29.0878			1.14037
29.1878			1.13659
29.2878			1.13615
29.3878			1.13414
29.4878			1.14203
29.5878			1.13772
29.6878			1.13467
29.7878			1.13902
29.8878			1.13391
29.9878			1.13356
30.0878			1.13475
30.1878			1.13278
0.273333				0.043997
0.373333				0.064302
0.473333				0.090162
0.573333				0.12074
0.673333				0.152646
0.773333				0.188049
0.873333				0.224595
0.973333				0.258899
1.07333				0.295683
1.17333				0.332201
1.27333				0.365074
1.37333				0.399058
1.47333				0.432522
1.57333				0.461228
1.67333				0.492525
1.77333				0.520275
1.87333				0.547305
1.97333				0.572012
2.07333				0.593576
2.17333				0.61566
2.27333				0.636413
2.37333				0.659576
2.47333				0.673447
2.57333				0.700862
2.67333				0.715789
2.77333				0.734714
2.87333				0.748122
2.97333				0.769868
3.07333				0.77933
3.17333				0.79297
3.27333				0.810271
3.37333				0.821879
3.47333				0.834889
3.57333				0.846212
3.67333				0.857251
3.77333				0.873132
3.87333				0.890754
3.97333				0.896722
4.07333				0.900814
4.17333				0.912931
4.27333				0.917055
4.37333				0.931929
4.47333				0.937965
4.57333				0.95017
4.67333				0.954618
4.77333				0.959867
4.87333				0.967589
4.97333				0.980574
5.07333				0.988054
5.17333				0.991968
5.27333				0.999352
5.37333				1.00273
5.47333				1.01376
5.57333				1.02489
5.67333				1.02228
5.77333				1.032
5.87333				1.03761
5.97333				1.03781
6.07333				1.04902
6.17333				1.05277
6.27333				1.05288
6.37333				1.05975
6.47333				1.0613
6.57333				1.07014
6.67333				1.0734
6.77333				1.0779
6.87333				1.08487
6.97333				1.09034
7.07333				1.08789
7.17333				1.08974
7.27333				1.10004
7.37333				1.10793
7.47333				1.11207
7.57333				1.12151
7.67333				1.12093
7.77333				1.12144
7.87333				1.12244
7.97333				1.1282
8.07333				1.13329
8.17333				1.14511
8.27333				1.14372
8.37333				1.14707
8.47333				1.1453
8.57333				1.15224
8.67333				1.15362
8.77333				1.16136
8.87333				1.16284
8.97333				1.16135
9.07333				1.16573
9.17333				1.16408
9.27333				1.16626
9.37333				1.17418
9.47333				1.17269
9.57333				1.17663
9.67333				1.18077
9.77333				1.18237
9.87333				1.1865
9.97333				1.18727
10.0733				1.18273
10.1733				1.19013
10.2733				1.18902
10.3733				1.19042
10.4733				1.19413
10.5733				1.19493
10.6733				1.19636
10.7733				1.19628
10.8733				1.18742
10.9733				1.19341
11.0733				1.19763
11.1733				1.20015
11.2733				1.20078
11.3733				1.20016
11.4733				1.20383
11.5733				1.19912
11.6733				1.19846
11.7733				1.20064
11.8733				1.20584
11.9733				1.207
12.0733				1.20518
12.1733				1.20788
12.2733				1.20536
12.3733				1.21065
12.4733				1.21206
12.5733				1.21166
12.6733				1.20994
12.7733				1.21252
12.8733				1.21026
12.9733				1.2042
13.0733				1.20558
13.1733				1.21175
13.2733				1.21009
13.3733				1.21288
13.4733				1.20742
13.5733				1.21455
13.6733				1.21182
13.7733				1.21225
13.8733				1.21329
13.9733				1.21152
14.0733				1.21454
14.1733				1.20751
14.2733				1.21802
14.3733				1.21474
14.4733				1.20971
14.5733				1.21774
14.6733				1.21159
14.7733				1.21076
14.8733				1.21459
14.9733				1.21273
15.0733				1.21393
15.1733				1.21361
15.2733				1.20867
15.3733				1.21213
15.4733				1.21773
15.5733				1.20843
15.6733				1.21333
15.7733				1.20872
15.8733				1.21062
15.9733				1.20487
16.0733				1.20693
16.1733				1.21342
16.2733				1.20828
16.3733				1.21401
16.4733				1.21338
16.5733				1.20826
16.6733				1.21192
16.7733				1.20947
16.8733				1.20871
16.9733				1.20512
17.0733				1.20845
17.1733				1.20208
17.2733				1.20946
17.3733				1.20254
17.4733				1.20545
17.5733				1.20914
17.6733				1.21237
17.7733				1.20685
17.8733				1.20212
17.9733				1.20911
18.0733				1.2096
18.1733				1.20626
18.2733				1.20135
18.3733				1.20595
18.4733				1.20719
18.5733				1.19957
18.6733				1.20448
18.7733				1.19814
18.8733				1.20144
18.9733				1.19935
19.0733				1.20018
19.1733				1.20246
19.2733				1.19591
19.3733				1.1972
19.4733				1.20115
19.5733				1.19538
19.6733				1.19436
19.7733				1.18772
19.8733				1.19268
19.9733				1.19692
20.0733				1.19622
20.1733				1.1922
20.2733				1.19022
20.3733				1.18972
20.4733				1.1851
20.5733				1.18592
20.6733				1.18812
20.7733				1.18444
20.8733				1.18196
20.9733				1.18747
21.0733				1.18391
21.1733				1.18506
21.2733				1.1827
21.3733				1.18703
21.4733				1.18553
21.5733				1.18368
21.6733				1.1743
21.7733				1.18342
21.8733				1.18207
21.9733				1.17719
22.0733				1.18171
22.1733				1.17921
22.2733				1.1792
22.3733				1.17694
22.4733				1.17471
22.5733				1.17943
22.6733				1.17841
22.7733				1.17685
22.8733				1.17954
22.9733				1.17454
23.0733				1.17977
23.1733				1.17796
23.2733				1.173
23.3733				1.17013
23.4733				1.16793
23.5733				1.17268
23.6733				1.17409
23.7733				1.16901
23.8733				1.17416
23.9733				1.17046
24.0733				1.17198
24.1733				1.16117
24.2733				1.16213
24.3733				1.1704
24.4733				1.15802
24.5733				1.15915
24.6733				1.15909
24.7733				1.1579
24.8733				1.1635
24.9733				1.1591
25.0733				1.16323
25.1733				1.16002
25.2733				1.15265
25.3733				1.15873
25.4733				1.15473
25.5733				1.15316
25.6733				1.1547
25.7733				1.15265
25.8733				1.14806
25.9733				1.15072
26.0733				1.14731
26.1733				1.14938
26.2733				1.15451
26.3733				1.14901
26.4733				1.14367
26.5733				1.14559
26.6733				1.13778
26.7733				1.1508
26.8733				1.14556
26.9733				1.14279
27.0733				1.13577
27.1733				1.13976
27.2733				1.1391
27.3733				1.13775
27.4733				1.13825
27.5733				1.13665
27.6733				1.13558
27.7733				1.1291
27.8733				1.13734
27.9733				1.13615
28.0733				1.13712
28.1733				1.12914
28.2733				1.13485
28.3733				1.13129
28.4733				1.13108
28.5733				1.12777
28.6733				1.1343
28.7733				1.12885
28.8733				1.12765
28.9733				1.12542
29.0733				1.12777
29.1733				1.12672
29.2733				1.12726
29.3733				1.12362
29.4733				1.1158
29.5733				1.12497
29.6733				1.12218
29.7733				1.12215
29.8733				1.11256
29.9733				1.11394
30.0733				1.11544
30.1733				1.11448
0.258889					0.076152
0.358889					0.111331
0.458889					0.144287
0.558889					0.170922
0.658889					0.200792
0.758889					0.22246
0.858889					0.246547
0.958889					0.265375
1.05889					0.282417
1.15889					0.303508
1.25889					0.322094
1.35889					0.339097
1.45889					0.355249
1.55889					0.36781
1.65889					0.382838
1.75889					0.396873
1.85889					0.408975
1.95889					0.419683
2.05889					0.434248
2.15889					0.447727
2.25889					0.455606
2.35889					0.468324
2.45889					0.479864
2.55889					0.484569
2.65889					0.496198
2.75889					0.509578
2.85889					0.513282
2.95889					0.526851
3.05889					0.529808
3.15889					0.541594
3.25889					0.547985
3.35889					0.555408
3.45889					0.565816
3.55889					0.5693
3.65889					0.575403
3.75889					0.580203
3.85889					0.587107
3.95889					0.591217
4.05889					0.603337
4.15889					0.604497
4.25889					0.612344
4.35889					0.615931
4.45889					0.620955
4.55889					0.624172
4.65889					0.627891
4.75889					0.631264
4.85889					0.63194
4.95889					0.640082
5.05889					0.64221
5.15889					0.647185
5.25889					0.648192
5.35889					0.654306
5.45889					0.661323
5.55889					0.657117
5.65889					0.662049
5.75889					0.66697
5.85889					0.665216
5.95889					0.667066
6.05889					0.673312
6.15889					0.671917
6.25889					0.67355
6.35889					0.684282
6.45889					0.686257
6.55889					0.681158
6.65889					0.685307
6.75889					0.688702
6.85889					0.687104
6.95889					0.691609
7.05889					0.691656
7.15889					0.687179
7.25889					0.691172
7.35889					0.698317
7.45889					0.700356
7.55889					0.69831
7.65889					0.700029
7.75889					0.704552
7.85889					0.706765
7.95889					0.708235
8.05889					0.711498
8.15889					0.708473
8.25889					0.70747
8.35889					0.708366
8.45889					0.714832
8.55889					0.716711
8.65889					0.717323
8.75889					0.712804
8.85889					0.716138
8.95889					0.716661
9.05889					0.717433
9.15889					0.715942
9.25889					0.717444
9.35889					0.718643
9.45889					0.718707
9.55889					0.721227
9.65889					0.720494
9.75889					0.72043
9.85889					0.724223
9.95889					0.724002
10.0589					0.723963
10.1589					0.723892
10.2589					0.724109
10.3589					0.729024
10.4589					0.725614
10.5589					0.726529
10.6589					0.727436
10.7589					0.724604
10.8589					0.728397
10.9589					0.729415
11.0589					0.726308
11.1589					0.730931
11.2589					0.7334
11.3589					0.729013
11.4589					0.729963
11.5589					0.72949
11.6589					0.729386
11.7589					0.724508
11.8589					0.729888
11.9589					0.732643
12.0589					0.731052
12.1589					0.731977
12.2589					0.732835
12.3589					0.729358
12.4589					0.735443
12.5589					0.726622
12.6589					0.734016
12.7589					0.727486
12.8589					0.729269
12.9589					0.732753
13.0589					0.732354
13.1589					0.727223
13.2589					0.729422
13.3589					0.733208
13.4589					0.73092
13.5589					0.730899
13.6589					0.732162
13.7589					0.737934
13.8589					0.730411
13.9589					0.732643
14.0589					0.735343
14.1589					0.730685
14.2589					0.732568
14.3589					0.734589
14.4589					0.735696
14.5589					0.729273
14.6589					0.732546
14.7589					0.735212
14.8589					0.738756
14.9589					0.732753
15.0589					0.736215
15.1589					0.73287
15.2589					0.734493
15.3589					0.726821
15.4589					0.730418
15.5589					0.731294
15.6589					0.735037
15.7589					0.735315
15.8589					0.73181
15.9589					0.728458
16.0589					0.734091
16.1589					0.729216
16.2589					0.731404
16.3589					0.735664
16.4589					0.734988
16.5589					0.730408
16.6589					0.728465
16.7589					0.728397
16.8589					0.73265
16.9589					0.730077
17.0589					0.727497
17.1589					0.733397
17.2589					0.735077
17.3589					0.735952
17.4589					0.732383
17.5589					0.730746
17.6589					0.732685
17.7589					0.728927
17.8589					0.730045
17.9589					0.726565
18.0589					0.730468
18.1589					0.726294
18.2589					0.729219
18.3589					0.724454
18.4589					0.728433
18.5589					0.727657
18.6589					0.729383
18.7589					0.729689
18.8589					0.731201
18.9589					0.728614
19.0589					0.730917
19.1589					0.728589
19.2589					0.72328
19.3589					0.726675
19.4589					0.731237
19.5589					0.722519
19.6589					0.725896
19.7589					0.721077
19.8589					0.729511
19.9589					0.730088
20.0589					0.721714
20.1589					0.721344
20.2589					0.72865
20.3589					0.725807
20.4589					0.722938
20.5589					0.727017
20.6589					0.72102
20.7589					0.722636
20.8589					0.729468
20.9589					0.725049
21.0589					0.72771
21.1589					0.726191
21.2589					0.724205
21.3589					0.721917
21.4589					0.722294
21.5589					0.724252
21.6589					0.717501
21.7589					0.720045
21.8589					0.721974
21.9589					0.720401
22.0589					0.718284
22.1589					0.721298
22.2589					0.725636
22.3589					0.721661
22.4589					0.718871
22.5589					0.717949
22.6589					0.721729
22.7589					0.721273
22.8589					0.718554
22.9589					0.718266
23.0589					0.716071
23.1589					0.717675
23.2589					0.716416
23.3589					0.715533
23.4589					0.715316
23.5589					0.717355
23.6589					0.717359
23.7589					0.715597
23.8589					0.718736
23.9589					0.716515
24.0589					0.714818
24.1589					0.714822
24.2589					0.715338
24.3589					0.712473
24.4589					0.716412
24.5589					0.717775
24.6589					0.710526
24.7589					0.709786
24.8589					0.710776
24.9589					0.710352
25.0589					0.707117
25.1589					0.715615
25.2589					0.713202
25.3589					0.711907
25.4589					0.707747
25.5589					0.71285
25.6589					0.708267
25.7589					0.705541
25.8589					0.709292
25.9589					0.709402
26.0589					0.704566
26.1589					0.709893
26.2589					0.710907
26.3589					0.708178
26.4589					0.707914
26.5589					0.707509
26.6589					0.704779
26.7589					0.702527
26.8589					0.704118
26.9589					0.707683
27.0589					0.703851
27.1589					0.703011
27.2589					0.705146
27.3589					0.705189
27.4589					0.701769
27.5589					0.697499
27.6589					0.701897
27.7589					0.700225
27.8589					0.699812
27.9589					0.704808
28.0589					0.703242
28.1589					0.700303
28.2589					0.700431
28.3589					0.699118
28.4589					0.70116
28.5589					0.701452
28.6589					0.698958
28.7589					0.695499
28.8589					0.699477
28.9589					0.700004
29.0589					0.700246
29.1589					0.69636
29.2589					0.696036
29.3589					0.696687
29.4589					0.700488
29.5589					0.691026
29.6589					0.693282
29.7589					0.694524
29.8589					0.692449
29.9589					0.695922
30.0589					0.695894
30.1589					0.693656
0.244444						0.077792
0.344444						0.105075
0.444444						0.133508
0.544444						0.159435
0.644444						0.186377
0.744444						0.205422
0.844444						0.227858
0.944444						0.244537
1.04444						0.265173
1.14444						0.277503
1.24444						0.292459
1.34444						0.30327
1.44444						0.311636
1.54444						0.326582
1.64444						0.332827
1.74444						0.344549
1.84444						0.354509
1.94444						0.361658
2.04444						0.372938
2.14444						0.380938
2.24444						0.385582
2.34444						0.398567
2.44444						0.403282
2.54444						0.408385
2.64444						0.417021
2.74444						0.424647
2.84444						0.435155
2.94444						0.444646
3.04444						0.448695
3.14444						0.456994
3.24444						0.466712
3.34444						0.468505
3.44444						0.477473
3.54444						0.484704
3.64444						0.492234
3.74444						0.501817
3.84444						0.504553
3.94444						0.512827
4.04444						0.519812
4.14444						0.525096
4.24444						0.530964
4.34444						0.537391
4.44444						0.545202
4.54444						0.546145
4.64444						0.551113
4.74444						0.560233
4.84444						0.565218
4.94444						0.569225
5.04444						0.573666
5.14444						0.578801
5.24444						0.587448
5.34444						0.594583
5.44444						0.593185
5.54444						0.595893
5.64444						0.604857
5.74444						0.608049
5.84444						0.610515
5.94444						0.614924
6.04444						0.61982
6.14444						0.622759
6.24444						0.625492
6.34444						0.632385
6.44444						0.635599
6.54444						0.636816
6.64444						0.636517
6.74444						0.645441
6.84444						0.643274
6.94444						0.648697
7.04444						0.650238
7.14444						0.658665
7.24444						0.657555
7.34444						0.662924
7.44444						0.663102
7.54444						0.666867
7.64444						0.67034
7.74444						0.6735
7.84444						0.67382
7.94444						0.676393
8.04444						0.681646
8.14444						0.678756
8.24444						0.683492
8.34444						0.691517
8.44444						0.685069
8.54444						0.693122
8.64444						0.691513
8.74444						0.692762
8.84444						0.699264
8.94444						0.701089
9.04444						0.701488
9.14444						0.699879
9.24444						0.706708
9.34444						0.703498
9.44444						0.70452
9.54444						0.702925
9.64444						0.711971
9.74444						0.709943
9.84444						0.713074
9.94444						0.711893
10.0444						0.715501
10.1444						0.716366
10.2444						0.720942
10.3444						0.71601
10.4444						0.717597
10.5444						0.721248
10.6444						0.71917
10.7444						0.727212
10.8444						0.721718
10.9444						0.726625
11.0444						0.723835
11.1444						0.720569
11.2444						0.730112
11.3444						0.732322
11.4444						0.729625
11.5444						0.732657
11.6444						0.730742
11.7444						0.73086
11.8444						0.730294
11.9444						0.733849
12.0444						0.733532
12.1444						0.730522
12.2444						0.73012
12.3444						0.735681
12.4444						0.737112
12.5444						0.738656
12.6444						0.740578
12.7444						0.738325
12.8444						0.734247
12.9444						0.742254
13.0444						0.743382
13.1444						0.742695
13.2444						0.73898
13.3444						0.741549
13.4444						0.745692
13.5444						0.743791
13.6444						0.739727
13.7444						0.746111
13.8444						0.74092
13.9444						0.745521
14.0444						0.744955
14.1444						0.744944
14.2444						0.742909
14.3444						0.748784
14.4444						0.748763
14.5444						0.747556
14.6444						0.749079
14.7444						0.74514
14.8444						0.750225
14.9444						0.748901
15.0444						0.750211
15.1444						0.748339
15.2444						0.749645
15.3444						0.74856
15.4444						0.750047
15.5444						0.748674
15.6444						0.747442
15.7444						0.751834
15.8444						0.749229
15.9444						0.748887
16.0444						0.746624
16.1444						0.754082
16.2444						0.752688
16.3444						0.754705
16.4444						0.749097
16.5444						0.751132
16.6444						0.750296
16.7444						0.747731
16.8444						0.756282
16.9444						0.751357
17.0444						0.75299
17.1444						0.748688
17.2444						0.745546
17.3444						0.749389
17.4444						0.754264
17.5444						0.749474
17.6444						0.753791
17.7444						0.751851
17.8444						0.752282
17.9444						0.757573
18.0444						0.751097
18.1444						0.750506
18.2444						0.747755
18.3444						0.751147
18.4444						0.744546
18.5444						0.755186
18.6444						0.753172
18.7444						0.753855
18.8444						0.750314
18.9444						0.755812
19.0444						0.753552
19.1444						0.75088
19.2444						0.74572
19.3444						0.753122
19.4444						0.75668
19.5444						0.751467
19.6444						0.748236
19.7444						0.750407
19.8444						0.749207
19.9444						0.754179
20.0444						0.750634
20.1444						0.747457
20.2444						0.751873
20.3444						0.752193
20.4444						0.749549
20.5444						0.753172
20.6444						0.753186
20.7444						0.753687
20.8444						0.742589
20.9444						0.747859
21.0444						0.750997
21.1444						0.750549
21.2444						0.749421
21.3444						0.748336
21.4444						0.744147
21.5444						0.747837
21.6444						0.750189
21.7444						0.746731
21.8444						0.748182
21.9444						0.747684
22.0444						0.740592
22.1444						0.749656
22.2444						0.747688
22.3444						0.742112
22.4444						0.747844
22.5444						0.746894
22.6444						0.740973
22.7444						0.751787
22.8444						0.748015
22.9444						0.746375
23.0444						0.745012
23.1444						0.750111
23.2444						0.743905
23.3444						0.744112
23.4444						0.748866
23.5444						0.744781
23.6444						0.742766
23.7444						0.739372
23.8444						0.738891
23.9444						0.743973
24.0444						0.744026
24.1444						0.741421
24.2444						0.74108
24.3444						0.741937
24.4444						0.740251
24.5444						0.739386
24.6444						0.73813
24.7444						0.740236
24.8444						0.736176
24.9444						0.742379
25.0444						0.73797
25.1444						0.739251
25.2444						0.741432
25.3444						0.739212
25.4444						0.738849
25.5444						0.734343
25.6444						0.73692
25.7444						0.736087
25.8444						0.739044
25.9444						0.741019
26.0444						0.735831
26.1444						0.729116
26.2444						0.738247
26.3444						0.736457
26.4444						0.734297
26.5444						0.735044
26.6444						0.732194
26.7444						0.72955
26.8444						0.733279
26.9444						0.730016
27.0444						0.728789
27.1444						0.728145
27.2444						0.733166
27.3444						0.729917
27.4444						0.731707
27.5444						0.730418
27.6444						0.729276
27.7444						0.733511
27.8444						0.730618
27.9444						0.727846
28.0444						0.725782
28.1444						0.730564
28.2444						0.719711
28.3444						0.727746
28.4444						0.727653
28.5444						0.727451
28.6444						0.727155
28.7444						0.724999
28.8444						0.722522
28.9444						0.722874
29.0444						0.729397
29.1444						0.720262
29.2444						0.723351
29.3444						0.720714
29.4444						0.724824
29.5444						0.721675
29.6444						0.723042
29.7444						0.723921
29.8444						0.721273
29.9444						0.719746
30.0444						0.720394
30.1444						0.721248
0.23							0.03951
0.33							0.065476
0.43							0.098261
0.53							0.140735
0.63							0.185128
0.73							0.235523
0.83							0.281862
0.93							0.334087
1.03							0.380319
1.13							0.423608
1.23							0.469982
1.33							0.512649
1.43							0.550091
1.53							0.589331
1.63							0.622429
1.73							0.652889
1.83							0.681977
1.93							0.71137
2.03							0.741809
2.13							0.764132
2.23							0.782095
2.33							0.803973
2.43							0.830391
2.53							0.848945
2.63							0.865745
2.73							0.893273
2.83							0.907052
2.93							0.92667
3.03							0.945655
3.13							0.958995
3.23							0.974019
3.33							0.984926
3.43							1.0013
3.53							1.02366
3.63							1.03232
3.73							1.04038
3.83							1.05787
3.93							1.06739
4.03							1.07893
4.13							1.0943
4.23							1.10625
4.33							1.11443
4.43							1.12525
4.53							1.136
4.63							1.14813
4.73							1.15618
4.83							1.16071
4.93							1.17166
5.03							1.18274
5.13							1.19034
5.23							1.20095
5.33							1.2048
5.43							1.21219
5.53							1.21852
5.63							1.22921
5.73							1.23199
5.83							1.23711
5.93							1.24916
6.03							1.25761
6.13							1.25378
6.23							1.26086
6.33							1.27038
6.43							1.27201
6.53							1.28257
6.63							1.28437
6.73							1.29054
6.83							1.29417
6.93							1.29366
7.03							1.29506
7.13							1.30238
7.23							1.30809
7.33							1.31311
7.43							1.32358
7.53							1.32366
7.63							1.32594
7.73							1.32085
7.83							1.33206
7.93							1.33709
8.03							1.33325
8.13							1.33887
8.23							1.34182
8.33							1.34495
8.43							1.34017
8.53							1.34686
8.63							1.35021
8.73							1.34852
8.83							1.35933
8.93							1.35041
9.03							1.36392
9.13							1.35993
9.23							1.36108
9.33							1.36638
9.43							1.3574
9.53							1.36231
9.63							1.36611
9.73							1.36762
9.83							1.372
9.93							1.37963
10.03							1.37066
10.13							1.37577
10.23							1.37927
10.33							1.37515
10.43							1.37718
10.53							1.37938
10.63							1.37849
10.73							1.36915
10.83							1.37912
10.93							1.3681
11.03							1.37928
11.13							1.37938
11.23							1.37662
11.33							1.3805
11.43							1.38184
11.53							1.3849
11.63							1.38203
11.73							1.37688
11.83							1.37655
11.93							1.37968
12.03							1.38398
12.13							1.3835
12.23							1.37895
12.33							1.38093
12.43							1.38254
12.53							1.37962
12.63							1.37797
12.73							1.3825
12.83							1.38502
12.93							1.3879
13.03							1.38122
13.13							1.37601
13.23							1.38016
13.33							1.38033
13.43							1.37989
13.53							1.37947
13.63							1.37452
13.73							1.38098
13.83							1.3743
13.93							1.37399
14.03							1.37907
14.13							1.36829
14.23							1.3715
14.33							1.37273
14.43							1.36811
14.53							1.37173
14.63							1.37542
14.73							1.36743
14.83							1.37141
14.93							1.3709
15.03							1.37332
15.13							1.37138
15.23							1.37622
15.33							1.3644
15.43							1.36538
15.53							1.36489
15.63							1.36637
15.73							1.37039
15.83							1.3609
15.93							1.36195
16.03							1.36168
16.13							1.36169
16.23							1.35664
16.33							1.36366
16.43							1.35979
16.53							1.3535
16.63							1.35313
16.73							1.36175
16.83							1.34854
16.93							1.34866
17.03							1.35381
17.13							1.35851
17.23							1.35406
17.33							1.3532
17.43							1.34367
17.53							1.34751
17.63							1.34259
17.73							1.34982
17.83							1.34659
17.93							1.34469
18.03							1.3381
18.13							1.3418
18.23							1.3354
18.33							1.33571
18.43							1.33982
18.53							1.33356
18.63							1.33483
18.73							1.33935
18.83							1.3405
18.93							1.33411
19.03							1.32944
19.13							1.32882
19.23							1.33057
19.33							1.32785
19.43							1.32921
19.53							1.32072
19.63							1.32448
19.73							1.32921
19.83							1.32306
19.93							1.3192
20.03							1.31223
[truncated: 2,801 more rows]

## Sheet: primary data -+val n=2
time	native	+8pos	+8neg	-8pos	-8neg	-17neg	-13pos	native +val	+8pos +val	+8neg +val	-8pos +val	-8neg +val	-17neg +val	-13pos +val
0.316667	0.082097
0.416667	0.130186
0.516667	0.18017
0.616667	0.232124
0.716667	0.282074
0.816667	0.326159
0.916667	0.367722
1.01667	0.405694
1.11667	0.432425
1.21667	0.465983
1.31667	0.488893
1.41667	0.509765
1.51667	0.529512
1.61667	0.551753
1.71667	0.568057
1.81667	0.583663
1.91667	0.600076
2.01667	0.616957
2.11667	0.632499
2.21667	0.644857
2.31667	0.658742
2.41667	0.670289
2.51667	0.682899
2.61667	0.694167
2.71667	0.708082
2.81667	0.718154
2.91667	0.72897
3.01667	0.741036
3.11667	0.752
3.21667	0.761605
3.31667	0.766623
3.41667	0.780517
3.51667	0.784851
3.61667	0.792738
3.71667	0.796693
3.81667	0.807551
3.91667	0.817666
4.01667	0.823266
4.11667	0.831113
4.21667	0.834759
4.31667	0.843838
4.41667	0.847217
4.51667	0.852717
4.61667	0.861991
4.71667	0.863044
4.81667	0.867853
4.91667	0.87464
5.01667	0.880915
5.11667	0.885468
5.21667	0.883249
5.31667	0.892893
5.41667	0.88892
5.51667	0.895179
5.61667	0.895255
5.71667	0.903603
5.81667	0.914279
5.91667	0.908966
6.01667	0.914312
6.11667	0.919907
6.21667	0.923215
6.31667	0.923176
6.41667	0.928613
6.51667	0.928947
6.61667	0.930015
6.71667	0.933646
6.81667	0.93686
6.91667	0.938096
7.01667	0.940127
7.11667	0.939037
7.21667	0.940731
7.31667	0.944018
7.41667	0.951188
7.51667	0.947955
7.61667	0.952551
7.71667	0.95419
7.81667	0.958968
7.91667	0.957372
8.01667	0.961552
8.11667	0.964041
8.21667	0.961767
8.31667	0.967055
8.41667	0.963734
8.51667	0.962963
8.61667	0.960277
8.71667	0.964648
8.81667	0.969241
8.91667	0.971608
9.01667	0.967665
9.11667	0.971751
9.21667	0.974119
9.31667	0.973408
9.41667	0.974034
9.51667	0.974195
9.61667	0.974826
9.71667	0.979898
9.81667	0.977731
9.91667	0.981756
10.0167	0.979583
10.1167	0.980208
10.2167	0.978584
10.3167	0.979477
10.4167	0.981319
10.5167	0.988383
10.6167	0.984003
10.7167	0.987533
10.8167	0.985957
10.9167	0.987408
11.0167	0.981003
11.1167	0.987624
11.2167	0.987527
11.3167	0.987302
11.4167	0.986416
11.5167	0.990471
11.6167	0.985636
11.7167	0.986288
11.8167	0.985089
11.9167	0.988847
12.0167	0.98637
12.1167	0.991634
12.2167	0.994809
12.3167	0.990857
12.4167	0.985596
12.5167	0.989436
12.6167	0.993829
12.7167	0.988195
12.8167	0.992545
12.9167	0.989661
13.0167	0.991655
13.1167	0.986977
13.2167	0.993968
13.3167	0.990159
13.4167	0.99021
13.5167	0.991564
13.6167	0.985396
13.7167	0.989697
13.8167	0.9931
13.9167	0.993225
14.0167	0.988501
14.1167	0.992857
14.2167	0.992533
14.3167	0.990641
14.4167	0.992857
14.5167	0.991825
14.6167	0.988228
14.7167	0.992727
14.8167	0.99351
14.9167	1
15.0167	0.992375
15.1167	0.992253
15.2167	0.988929
15.3167	0.988859
15.4167	0.99014
15.5167	0.988635
15.6167	0.9931
15.7167	0.986088
15.8167	0.991613
15.9167	0.990596
16.0167	0.989269
16.1167	0.995696
16.2167	0.993112
16.3167	0.987575
16.4167	0.993741
16.5167	0.990259
16.6167	0.987961
16.7167	0.99059
16.8167	0.985806
16.9167	0.989263
17.0167	0.992375
17.1167	0.985205
17.2167	0.993677
17.3167	0.989901
17.4167	0.989658
17.5167	0.986173
17.6167	0.989752
17.7167	0.988419
17.8167	0.99096
17.9167	0.990241
18.0167	0.986847
18.1167	0.990581
18.2167	0.986577
18.3167	0.991628
18.4167	0.983359
18.5167	0.988538
18.6167	0.987299
18.7167	0.988938
18.8167	0.990738
18.9167	0.985973
19.0167	0.988702
19.1167	0.985542
19.2167	0.984816
19.3167	0.982415
19.4167	0.985593
19.5167	0.979276
19.6167	0.979422
19.7167	0.978196
19.8167	0.981043
19.9167	0.980484
20.0167	0.977859
20.1167	0.979003
20.2167	0.981996
20.3167	0.983052
20.4167	0.980408
20.5167	0.981219
20.6167	0.980254
20.7167	0.981055
20.8167	0.976326
20.9167	0.97761
21.0167	0.976313
21.1167	0.977825
21.2167	0.978132
21.3167	0.980232
21.4167	0.978921
21.5167	0.977203
21.6167	0.979033
21.7167	0.971347
21.8167	0.981067
21.9167	0.975867
22.0167	0.975096
22.1167	0.971287
22.2167	0.975706
22.3167	0.972525
22.4167	0.975278
22.5167	0.969456
22.6167	0.976113
22.7167	0.97346
22.8167	0.970212
22.9167	0.971736
23.0167	0.970452
23.1167	0.968643
23.2167	0.974589
23.3167	0.968813
23.4167	0.971366
23.5167	0.968521
23.6167	0.974343
23.7167	0.973815
23.8167	0.962098
23.9167	0.962754
24.0167	0.969113
24.1167	0.963795
24.2167	0.965968
24.3167	0.962359
24.4167	0.963816
24.5167	0.967629
24.6167	0.966405
24.7167	0.963136
24.8167	0.96656
24.9167	0.964095
25.0167	0.9652
25.1167	0.962544
25.2167	0.961078
25.3167	0.961597
25.4167	0.968512
25.5167	0.964441
25.6167	0.958483
25.7167	0.957484
25.8167	0.966223
25.9167	0.960696
26.0167	0.964617
26.1167	0.956622
26.2167	0.957551
26.3167	0.957147
26.4167	0.961558
26.5167	0.961794
26.6167	0.956261
26.7167	0.955845
26.8167	0.959029
26.9167	0.958816
27.0167	0.958856
27.1167	0.956607
27.2167	0.957596
27.3167	0.956203
27.4167	0.953969
27.5167	0.957848
27.6167	0.953328
27.7167	0.957535
27.8167	0.953082
27.9167	0.949015
28.0167	0.949789
28.1167	0.951036
28.2167	0.954949
28.3167	0.947986
28.4167	0.949036
28.5167	0.950736
28.6167	0.947567
28.7167	0.945958
28.8167	0.946419
28.9167	0.949925
29.0167	0.946052
29.1167	0.947309
29.2167	0.949358
29.3167	0.954591
29.4167	0.949692
29.5167	0.944316
29.6167	0.943457
29.7167	0.942676
29.8167	0.94237
29.9167	0.945308
30.0167	0.941329
30.1167	0.94512
30.2167	0.946577
0.287778		0.079972
0.387778		0.106403
0.487778		0.132314
0.587778		0.159486
0.687778		0.179891
0.787778		0.205432
0.887778		0.225221
0.987778		0.24864
1.08778		0.26998
1.18778		0.289399
1.28778		0.308996
1.38778		0.32843
1.48778		0.349366
1.58778		0.370315
1.68778		0.379479
1.78778		0.40122
1.88778		0.422651
1.98778		0.43598
2.08778		0.452991
2.18778		0.468445
2.28778		0.484127
2.38778		0.503002
2.48778		0.519024
2.58778		0.527778
2.68778		0.542762
2.78778		0.560875
2.88778		0.574839
2.98778		0.588529
3.08778		0.599324
3.18778		0.614653
3.28778		0.62794
3.38778		0.638698
3.48778		0.650449
3.58778		0.656945
3.68778		0.672721
3.78778		0.683473
3.88778		0.689116
3.98778		0.704124
4.08778		0.713722
4.18778		0.719493
4.28778		0.731951
4.38778		0.735229
4.48778		0.74636
4.58778		0.752741
4.68778		0.764036
4.78778		0.768177
4.88778		0.774822
4.98778		0.777423
5.08778		0.789134
5.18778		0.794067
5.28778		0.799203
5.38778		0.806322
5.48778		0.813149
5.58778		0.817308
5.68778		0.822805
5.78778		0.828345
5.88778		0.833074
5.98778		0.836687
6.08778		0.838584
6.18778		0.842126
6.28778		0.85157
6.38778		0.850046
6.48778		0.858194
6.58778		0.859101
6.68778		0.864155
6.78778		0.864872
6.88778		0.868606
6.98778		0.873702
7.08778		0.875056
7.18778		0.879461
7.28778		0.873508
7.38778		0.88056
7.48778		0.882855
7.58778		0.888419
7.68778		0.887411
7.78778		0.885741
7.88778		0.8879
7.98778		0.889172
8.08778		0.897286
8.18778		0.89591
8.28778		0.898803
8.38778		0.903633
8.48778		0.901684
8.58778		0.904893
8.68778		0.907418
8.78778		0.913666
8.88778		0.910247
8.98778		0.911337
9.08778		0.913277
9.18778		0.912278
9.28778		0.919445
9.38778		0.919239
9.48778		0.924842
9.58778		0.921233
9.68778		0.925055
9.78778		0.923631
9.88778		0.920933
9.98778		0.922541
10.0878		0.928734
10.1878		0.928333
10.2878		0.924105
10.3878		0.926755
10.4878		0.930313
10.5878		0.930479
10.6878		0.930486
10.7878		0.931044
10.8878		0.931414
10.9878		0.932814
11.0878		0.932474
11.1878		0.932179
11.2878		0.936863
11.3878		0.933682
11.4878		0.936648
11.5878		0.937264
11.6878		0.935928
11.7878		0.934593
11.8878		0.935685
11.9878		0.939161
12.0878		0.93748
12.1878		0.939583
12.2878		0.943041
12.3878		0.936748
12.4878		0.943341
12.5878		0.942166
12.6878		0.945196
12.7878		0.944531
12.8878		0.942995
12.9878		0.943627
13.0878		0.94138
13.1878		0.944376
13.2878		0.943241
13.3878		0.941371
13.4878		0.940983
13.5878		0.944206
13.6878		0.944565
13.7878		0.945858
13.8878		0.942995
13.9878		0.942834
14.0878		0.942637
14.1878		0.943906
14.2878		0.948453
14.3878		0.943915
14.4878		0.949919
14.5878		0.94886
14.6878		0.95062
14.7878		0.943147
14.8878		0.951264
14.9878		0.949209
15.0878		0.945117
15.1878		0.950605
15.2878		0.951385
15.3878		0.947215
15.4878		0.945041
15.5878		0.946204
15.6878		0.948793
15.7878		0.948016
15.8878		0.942901
15.9878		0.946028
16.0878		0.949591
16.1878		0.95216
16.2878		0.946107
16.3878		0.94448
16.4878		0.950229
16.5878		0.947263
16.6878		0.946847
16.7878		0.950159
16.8878		0.947263
16.9878		0.948826
17.0878		0.944398
17.1878		0.945946
17.2878		0.948241
17.3878		0.94614
17.4878		0.945521
17.5878		0.945606
17.6878		0.945754
17.7878		0.94315
17.8878		0.944662
17.9878		0.945745
18.0878		0.941271
18.1878		0.942843
18.2878		0.946252
18.3878		0.94373
18.4878		0.946853
18.5878		0.945005
18.6878		0.943581
18.7878		0.943047
18.8878		0.93975
18.9878		0.938135
19.0878		0.942109
19.1878		0.935203
19.2878		0.94498
19.3878		0.947199
19.4878		0.938715
19.5878		0.939686
19.6878		0.941772
19.7878		0.938988
19.8878		0.940764
19.9878		0.93938
20.0878		0.934031
20.1878		0.934392
20.2878		0.935215
20.3878		0.933594
20.4878		0.938445
20.5878		0.933673
20.6878		0.935197
20.7878		0.938888
20.8878		0.935087
20.9878		0.931035
21.0878		0.933488
21.1878		0.939598
21.2878		0.927077
21.3878		0.931882
21.4878		0.933782
21.5878		0.935931
21.6878		0.929806
21.7878		0.930725
21.8878		0.930234
21.9878		0.932653
22.0878		0.925164
22.1878		0.927101
22.2878		0.929077
22.3878		0.931342
22.4878		0.927863
22.5878		0.92979
22.6878		0.925204
22.7878		0.927231
22.8878		0.928163
22.9878		0.928279
23.0878		0.922642
23.1878		0.924499
23.2878		0.927116
23.3878		0.922007
23.4878		0.923164
23.5878		0.922894
23.6878		0.926439
23.7878		0.921118
23.8878		0.919005
23.9878		0.91845
24.0878		0.924251
24.1878		0.923668
24.2878		0.919406
24.3878		0.923191
24.4878		0.918626
24.5878		0.918025
24.6878		0.918856
24.7878		0.917988
24.8878		0.91471
24.9878		0.913969
25.0878		0.91494
25.1878		0.916659
25.2878		0.914922
25.3878		0.911604
25.4878		0.908824
25.5878		0.91063
25.6878		0.912469
25.7878		0.908068
25.8878		0.914789
25.9878		0.908912
26.0878		0.910169
26.1878		0.906584
26.2878		0.905761
26.3878		0.907175
26.4878		0.906787
26.5878		0.901939
26.6878		0.90407
26.7878		0.905931
26.8878		0.904425
26.9878		0.905916
27.0878		0.899848
27.1878		0.904826
27.2878		0.898791
27.3878		0.89958
27.4878		0.899414
27.5878		0.900115
27.6878		0.897103
27.7878		0.897741
27.8878		0.895273
27.9878		0.900276
28.0878		0.899368
28.1878		0.897459
28.2878		0.899231
28.3878		0.894851
28.4878		0.896554
28.5878		0.896688
28.6878		0.8914
28.7878		0.891809
28.8878		0.884406
28.9878		0.885984
29.0878		0.889005
29.1878		0.889651
29.2878		0.884967
29.3878		0.891363
29.4878		0.886731
29.5878		0.887966
29.6878		0.886619
29.7878		0.887034
29.8878		0.883659
29.9878		0.882672
30.0878		0.88103
30.1878		0.882017
0.258889			0.026076
0.358889			0.035923
0.458889			0.04971
0.558889			0.066379
0.658889			0.085299
0.758889			0.104915
0.858889			0.129819
0.958889			0.157127
1.05889			0.180589
1.15889			0.207985
1.25889			0.235232
1.35889			0.259853
1.45889			0.286038
1.55889			0.314809
1.65889			0.337534
1.75889			0.361557
1.85889			0.38528
1.95889			0.408969
2.05889			0.431657
2.15889			0.450068
2.25889			0.470206
2.35889			0.495107
2.45889			0.510336
2.55889			0.52902
2.65889			0.54805
2.75889			0.565155
2.85889			0.580737
2.95889			0.59787
3.05889			0.6104
3.15889			0.626765
3.25889			0.642939
3.35889			0.657889
3.45889			0.672727
3.55889			0.683718
3.65889			0.695991
3.75889			0.710192
3.85889			0.721487
3.95889			0.73077
4.05889			0.743364
4.15889			0.754113
4.25889			0.765348
4.35889			0.773073
4.45889			0.785704
4.55889			0.794322
4.65889			0.803046
4.75889			0.81541
4.85889			0.825066
4.95889			0.832804
5.05889			0.839786
5.15889			0.844212
5.25889			0.856897
5.35889			0.861129
5.45889			0.872169
5.55889			0.881273
5.65889			0.884269
5.75889			0.893294
5.85889			0.897328
5.95889			0.90421
6.05889			0.916009
6.15889			0.921865
6.25889			0.933315
6.35889			0.933676
6.45889			0.943022
6.55889			0.944513
6.65889			0.955235
6.75889			0.957326
6.85889			0.96449
6.95889			0.967179
7.05889			0.970573
7.15889			0.98016
7.25889			0.985247
7.35889			0.990544
7.45889			0.993361
7.55889			0.997572
7.65889			1.00337
7.75889			1.00779
7.85889			1.01256
7.95889			1.01725
8.05889			1.02259
8.15889			1.02263
8.25889			1.02796
8.35889			1.03584
8.45889			1.03841
8.55889			1.03476
8.65889			1.0428
8.75889			1.04455
8.85889			1.04834
8.95889			1.04495
9.05889			1.05218
9.15889			1.06054
9.25889			1.06746
9.35889			1.06355
9.45889			1.0693
9.55889			1.07014
9.65889			1.07216
9.75889			1.07126
9.85889			1.07592
9.95889			1.07719
10.0589			1.08259
10.1589			1.08641
10.2589			1.08367
10.3589			1.08909
10.4589			1.0902
10.5589			1.09413
10.6589			1.09589
10.7589			1.09317
10.8589			1.10048
10.9589			1.10163
11.0589			1.10724
11.1589			1.10684
11.2589			1.10957
11.3589			1.10749
11.4589			1.11359
11.5589			1.11106
11.6589			1.1128
11.7589			1.11327
11.8589			1.12187
11.9589			1.12352
12.0589			1.1228
12.1589			1.12403
12.2589			1.12262
12.3589			1.12371
12.4589			1.1246
12.5589			1.12902
12.6589			1.12988
12.7589			1.13007
12.8589			1.13299
12.9589			1.12651
13.0589			1.13582
13.1589			1.13765
13.2589			1.13321
13.3589			1.1346
13.4589			1.1368
13.5589			1.13837
13.6589			1.14042
13.7589			1.14538
13.8589			1.14102
13.9589			1.14524
14.0589			1.14754
14.1589			1.14315
14.2589			1.14355
14.3589			1.14582
14.4589			1.1439
14.5589			1.14409
14.6589			1.1484
14.7589			1.14648
14.8589			1.14503
14.9589			1.14766
15.0589			1.15401
15.1589			1.14603
15.2589			1.14923
15.3589			1.15742
15.4589			1.15161
15.5589			1.14927
15.6589			1.16096
15.7589			1.15022
15.8589			1.1535
15.9589			1.15775
16.0589			1.15328
16.1589			1.16066
16.2589			1.15425
16.3589			1.15796
16.4589			1.15427
16.5589			1.15364
16.6589			1.15532
16.7589			1.15859
16.8589			1.15495
16.9589			1.15564
17.0589			1.15819
17.1589			1.15761
17.2589			1.16055
17.3589			1.16106
17.4589			1.15776
17.5589			1.15861
17.6589			1.16404
17.7589			1.15966
17.8589			1.162
17.9589			1.16121
18.0589			1.16039
18.1589			1.15904
18.2589			1.15865
18.3589			1.16128
18.4589			1.161
18.5589			1.16331
18.6589			1.1634
18.7589			1.15776
18.8589			1.16593
18.9589			1.15498
19.0589			1.16677
19.1589			1.15929
19.2589			1.16115
19.3589			1.15839
19.4589			1.15969
19.5589			1.159
19.6589			1.15636
19.7589			1.15525
19.8589			1.15771
19.9589			1.15424
20.0589			1.15984
20.1589			1.16102
20.2589			1.15481
20.3589			1.15719
20.4589			1.15838
20.5589			1.15639
20.6589			1.15909
20.7589			1.15114
20.8589			1.14555
20.9589			1.15203
21.0589			1.15108
21.1589			1.15269
21.2589			1.15175
21.3589			1.15426
21.4589			1.15822
21.5589			1.15362
21.6589			1.14632
21.7589			1.15064
21.8589			1.15199
21.9589			1.15182
22.0589			1.15181
22.1589			1.15018
22.2589			1.14824
22.3589			1.14337
22.4589			1.14552
22.5589			1.14902
22.6589			1.15342
22.7589			1.15013
22.8589			1.1481
22.9589			1.13987
23.0589			1.1444
23.1589			1.14247
23.2589			1.14524
23.3589			1.14671
23.4589			1.1395
23.5589			1.13707
23.6589			1.14102
23.7589			1.13939
23.8589			1.14386
23.9589			1.14166
24.0589			1.13765
24.1589			1.13749
24.2589			1.13937
24.3589			1.13362
24.4589			1.13417
24.5589			1.13641
24.6589			1.13871
24.7589			1.13183
24.8589			1.13595
24.9589			1.13565
25.0589			1.13043
25.1589			1.13393
25.2589			1.129
25.3589			1.13387
25.4589			1.13431
25.5589			1.13143
25.6589			1.12664
25.7589			1.12857
25.8589			1.13392
25.9589			1.12637
26.0589			1.12818
26.1589			1.1294
26.2589			1.13026
26.3589			1.12823
26.4589			1.12446
26.5589			1.12448
26.6589			1.13016
26.7589			1.1279
26.8589			1.12146
26.9589			1.12196
27.0589			1.13025
27.1589			1.12566
27.2589			1.1214
27.3589			1.12127
27.4589			1.11825
27.5589			1.12022
27.6589			1.11862
27.7589			1.11741
27.8589			1.12143
27.9589			1.1215
28.0589			1.1169
28.1589			1.11564
28.2589			1.11322
28.3589			1.11135
28.4589			1.11234
28.5589			1.11485
28.6589			1.11332
28.7589			1.11103
28.8589			1.11786
28.9589			1.11224
29.0589			1.10813
29.1589			1.10726
29.2589			1.1089
29.3589			1.1124
29.4589			1.09982
29.5589			1.10335
29.6589			1.10414
29.7589			1.10841
29.8589			1.10402
29.9589			1.10575
30.0589			1.10303
30.1589			1.10514
0.23				0.042738
0.33				0.068504
0.43				0.102116
0.53				0.13817
0.63				0.179053
0.73				0.217996
0.83				0.255151
0.93				0.298933
1.03				0.335931
1.13				0.370081
1.23				0.407361
1.33				0.440263
1.43				0.467061
1.53				0.495529
1.63				0.529876
1.73				0.550053
1.83				0.574144
1.93				0.599949
2.03				0.619692
2.13				0.637614
2.23				0.659
2.33				0.680452
2.43				0.694586
2.53				0.714114
2.63				0.730336
2.73				0.74263
2.83				0.757565
2.93				0.771349
3.03				0.782963
3.13				0.799443
3.23				0.808256
3.33				0.821308
3.43				0.830649
3.53				0.842488
3.63				0.85776
3.73				0.867695
3.83				0.873374
3.93				0.885122
4.03				0.895555
4.13				0.903457
4.23				0.913763
4.33				0.9246
4.43				0.932286
4.53				0.935682
4.63				0.947488
4.73				0.951674
4.83				0.95732
4.93				0.967125
5.03				0.967356
5.13				0.979282
5.23				0.980333
5.33				0.992572
5.43				1.0026
5.53				1.0054
5.63				1.00431
5.73				1.01332
5.83				1.01778
5.93				1.02612
6.03				1.02765
6.13				1.02569
6.23				1.03892
6.33				1.04198
6.43				1.04392
6.53				1.05123
6.63				1.05539
6.73				1.05571
6.83				1.058
6.93				1.06423
7.03				1.06641
7.13				1.07606
7.23				1.07223
7.33				1.08355
7.43				1.08376
7.53				1.08551
7.63				1.08895
7.73				1.09148
7.83				1.09804
7.93				1.09887
8.03				1.09806
8.13				1.09929
8.23				1.10461
8.33				1.10671
8.43				1.10956
8.53				1.11443
8.63				1.11259
8.73				1.11896
8.83				1.11819
8.93				1.12397
9.03				1.12401
9.13				1.12695
9.23				1.12685
9.33				1.12777
9.43				1.12992
9.53				1.1254
9.63				1.13208
9.73				1.13309
9.83				1.13394
9.93				1.13539
10.03				1.13842
10.13				1.14225
10.23				1.1426
10.33				1.14109
10.43				1.14364
10.53				1.14636
10.63				1.14285
10.73				1.14509
10.83				1.1424
10.93				1.14551
11.03				1.1491
11.13				1.14815
11.23				1.15034
11.33				1.1515
11.43				1.15131
11.53				1.15061
11.63				1.15144
11.73				1.15262
11.83				1.15671
11.93				1.1525
12.03				1.15377
12.13				1.15697
12.23				1.15584
12.33				1.15986
12.43				1.15767
12.53				1.1603
12.63				1.16432
12.73				1.16049
12.83				1.1628
12.93				1.15944
13.03				1.15931
13.13				1.16042
13.23				1.15946
13.33				1.16448
13.43				1.15646
13.53				1.1669
13.63				1.15694
13.73				1.16795
13.83				1.16114
13.93				1.16445
14.03				1.16297
14.13				1.17132
14.23				1.16542
14.33				1.16501
14.43				1.16789
14.53				1.16505
14.63				1.1642
14.73				1.16558
14.83				1.16648
14.93				1.16193
15.03				1.16118
15.13				1.16757
15.23				1.16983
15.33				1.16559
15.43				1.16325
15.53				1.17081
15.63				1.1653
15.73				1.16595
15.83				1.16985
15.93				1.17037
16.03				1.16062
16.13				1.15826
16.23				1.1671
16.33				1.16259
16.43				1.16945
16.53				1.1633
16.63				1.16128
16.73				1.16468
16.83				1.16201
16.93				1.1681
17.03				1.15768
17.13				1.16181
17.23				1.16117
17.33				1.16523
17.43				1.15657
17.53				1.16721
17.63				1.1604
17.73				1.16257
17.83				1.16483
17.93				1.15744
18.03				1.15968
18.13				1.15732
18.23				1.15983
18.33				1.16085
18.43				1.16081
18.53				1.15288
18.63				1.16283
18.73				1.15811
18.83				1.15508
18.93				1.15489
19.03				1.15482
19.13				1.15818
19.23				1.15687
19.33				1.15422
19.43				1.15212
19.53				1.15152
19.63				1.1514
19.73				1.15216
19.83				1.15238
19.93				1.14631
20.03				1.14938
20.13				1.14657
20.23				1.1462
20.33				1.14664
20.43				1.14615
20.53				1.14305
20.63				1.14064
20.73				1.14257
20.83				1.14684
20.93				1.14546
21.03				1.14356
21.13				1.14488
21.23				1.13694
21.33				1.13654
21.43				1.14422
21.53				1.13929
21.63				1.13998
21.73				1.14125
21.83				1.13506
21.93				1.13802
22.03				1.1367
22.13				1.14269
22.23				1.13482
22.33				1.13344
22.43				1.13258
22.53				1.13367
22.63				1.13116
22.73				1.12644
22.83				1.13563
22.93				1.12989
23.03				1.13014
23.13				1.12436
23.23				1.12925
23.33				1.13143
23.43				1.12504
23.53				1.12687
23.63				1.12791
23.73				1.12372
23.83				1.12911
23.93				1.13004
24.03				1.1238
24.13				1.12348
24.23				1.12257
24.33				1.12557
24.43				1.12021
24.53				1.12239
24.63				1.12064
24.73				1.1125
24.83				1.12825
24.93				1.11975
25.03				1.11536
25.13				1.1125
25.23				1.11545
25.33				1.11498
25.43				1.11742
25.53				1.1151
25.63				1.10956
25.73				1.11428
25.83				1.10988
25.93				1.1081
26.03				1.11128
26.13				1.11412
26.23				1.10358
26.33				1.10306
26.43				1.11065
26.53				1.10588
26.63				1.10727
26.73				1.10477
26.83				1.10022
26.93				1.10054
27.03				1.10312
27.13				1.10321
27.23				1.09659
27.33				1.09891
27.43				1.09984
27.53				1.10086
27.63				1.09642
27.73				1.09849
27.83				1.09307
27.93				1.09227
28.03				1.09638
28.13				1.09199
28.23				1.09475
28.33				1.0981
28.43				1.09325
28.53				1.08947
28.63				1.08977
28.73				1.08988
28.83				1.08977
28.93				1.08772
29.03				1.08652
29.13				1.0901
29.23				1.0852
29.33				1.08644
29.43				1.0867
29.53				1.08573
29.63				1.08778
29.73				1.08518
29.83				1.08141
29.93				1.082
30.03				1.08326
30.13				1.08036
0.201111					0.052867
0.301111					0.097457
0.401111					0.139624
0.501111					0.175079
0.601111					0.20256
0.701111					0.231371
0.801111					0.255403
0.901111					0.277463
1.00111					0.300755
1.10111					0.317608
1.20111					0.336556
1.30111					0.3565
1.40111					0.372898
1.50111					0.389648
1.60111					0.407822
1.70111					0.42279
1.80111					0.435649
1.90111					0.451883
2.00111					0.46846
2.10111					0.482193
2.20111					0.492757
2.30111					0.503427
2.40111					0.518134
2.50111					0.530025
2.60111					0.541299
2.70111					0.549653
2.80111					0.563489
2.90111					0.573625
3.00111					0.587549
3.10111					0.593149
3.20111					0.60154
3.30111					0.615509
3.40111					0.620406
3.50111					0.631367
3.60111					0.640371
3.70111					0.643109
3.80111					0.652252
3.90111					0.656963
4.00111					0.662463
4.10111					0.670511
4.20111					0.677854
4.30111					0.683576
4.40111					0.688196
4.50111					0.695703
4.60111					0.697536
4.70111					0.704603
4.80111					0.712323
4.90111					0.712553
5.00111					0.718239
5.10111					0.721007
5.20111					0.721502
5.30111					0.726301
5.40111					0.730918
5.50111					0.738917
5.60111					0.739494
5.70111					0.740793
5.80111					0.745708
5.90111					0.752113
6.00111					0.751469
6.10111					0.758278
6.20111					0.7625
6.30111					0.758861
6.40111					0.76013
6.50111					0.768338
6.60111					0.764616
6.70111					0.776376
6.80111					0.772761
6.90111					0.773386
7.00111					0.774691
7.10111					0.779123
7.20111					0.78524
7.30111					0.78191
7.40111					0.783021
7.50111					0.788403
7.60111					0.790179
7.70111					0.788898
7.80111					0.793357
7.90111					0.794641
8.00111					0.793063
8.10111					0.795931
8.20111					0.797476
8.30111					0.802233
8.40111					0.802907
8.50111					0.805991
8.60111					0.807906
8.70111					0.807988
8.80111					0.800991
8.90111					0.804279
9.00111					0.806841
9.10111					0.809184
9.20111					0.813279
9.30111					0.810723
9.40111					0.810702
9.50111					0.811834
9.60111					0.815401
9.70111					0.81406
9.80111					0.818507
9.90111					0.818522
10.0011					0.817471
10.1011					0.816154
10.2011					0.822644
10.3011					0.819384
10.4011					0.823652
10.5011					0.822577
10.6011					0.819633
10.7011					0.823855
10.8011					0.820738
10.9011					0.821809
11.0011					0.823913
11.1011					0.823233
11.2011					0.822863
11.3011					0.823804
11.4011					0.825148
11.5011					0.828485
11.6011					0.826994
11.7011					0.82873
11.8011					0.824493
11.9011					0.827975
12.0011					0.828873
12.1011					0.829049
12.2011					0.831031
12.3011					0.834249
12.4011					0.829086
12.5011					0.828727
12.6011					0.82812
12.7011					0.828594
12.8011					0.83043
12.9011					0.8319
13.0011					0.833357
13.1011					0.829875
13.2011					0.829832
13.3011					0.827762
13.4011					0.83033
13.5011					0.830831
13.6011					0.83054
13.7011					0.833845
13.8011					0.829869
13.9011					0.831195
14.0011					0.829756
14.1011					0.831144
14.2011					0.828603
14.3011					0.830594
14.4011					0.83414
14.5011					0.828967
14.6011					0.838632
14.7011					0.83207
14.8011					0.828776
14.9011					0.832798
15.0011					0.83703
15.1011					0.834899
15.2011					0.83268
15.3011					0.829064
15.4011					0.837254
15.5011					0.830382
15.6011					0.833942
15.7011					0.834449
15.8011					0.833864
15.9011					0.830464
16.0011					0.833666
16.1011					0.83315
16.2011					0.830904
16.3011					0.834762
16.4011					0.831529
16.5011					0.836122
16.6011					0.832288
16.7011					0.832337
16.8011					0.829322
16.9011					0.830704
17.0011					0.828084
17.1011					0.828102
17.2011					0.8339
17.3011					0.8319
17.4011					0.834443
17.5011					0.832382
17.6011					0.831557
17.7011					0.82999
17.8011					0.836246
17.9011					0.828245
18.0011					0.829939
18.1011					0.831411
18.2011					0.832085
18.3011					0.834468
18.4011					0.832765
18.5011					0.828111
18.6011					0.830063
18.7011					0.833263
18.8011					0.830288
18.9011					0.831429
19.0011					0.827965
19.1011					0.823889
19.2011					0.8286
19.3011					0.825916
19.4011					0.828472
19.5011					0.826004
19.6011					0.825091
19.7011					0.825218
19.8011					0.822644
19.9011					0.829583
20.0011					0.829386
20.1011					0.828308
20.2011					0.829489
20.3011					0.825801
20.4011					0.821876
20.5011					0.818039
20.6011					0.825986
20.7011					0.825634
20.8011					0.82357
20.9011					0.823798
21.0011					0.82639
21.1011					0.817921
21.2011					0.826317
21.3011					0.821093
21.4011					0.821072
21.5011					0.816442
21.6011					0.821566
21.7011					0.818583
21.8011					0.818516
21.9011					0.819454
22.0011					0.817298
22.1011					0.817086
22.2011					0.815456
22.3011					0.822076
22.4011					0.816676
22.5011					0.814129
22.6011					0.817839
22.7011					0.820471
22.8011					0.814648
22.9011					0.811422
23.0011					0.812721
23.1011					0.815571
23.2011					0.812126
23.3011					0.809764
23.4011					0.81144
23.5011					0.808007
23.6011					0.810887
23.7011					0.812684
23.8011					0.809965
23.9011					0.809506
24.0011					0.806677
24.1011					0.806908
24.2011					0.814184
24.3011					0.810775
24.4011					0.806604
24.5011					0.8044
24.6011					0.808741
24.7011					0.805657
24.8011					0.803062
24.9011					0.801677
25.0011					0.808756
25.1011					0.806137
25.2011					0.802054
25.3011					0.802788
25.4011					0.807594
25.5011					0.803329
25.6011					0.80107
25.7011					0.800739
25.8011					0.799735
25.9011					0.803101
26.0011					0.798985
26.1011					0.799349
26.2011					0.798657
26.3011					0.799604
26.4011					0.799586
26.5011					0.79802
26.6011					0.792492
26.7011					0.795367
26.8011					0.796034
26.9011					0.796444
27.0011					0.791976
27.1011					0.800211
27.2011					0.795251
27.3011					0.78813
27.4011					0.791976
27.5011					0.791554
27.6011					0.787668
27.7011					0.789726
27.8011					0.79499
27.9011					0.790291
28.0011					0.787923
28.1011					0.787386
28.2011					0.789226
28.3011					0.786621
28.4011					0.785804
28.5011					0.784933
28.6011					0.780832
28.7011					0.781196
28.8011					0.784017
28.9011					0.780413
29.0011					0.783425
29.1011					0.785868
29.2011					0.781661
29.3011					0.780067
29.4011					0.780562
29.5011					0.781084
29.6011					0.780316
29.7011					0.779563
29.8011					0.776066
29.9011					0.777703
30.0011					0.780337
30.1011					0.77246
0.172222						0.054224
0.272222						0.088906
0.372222						0.122151
0.472222						0.150154
0.572222						0.184471
0.672222						0.209433
0.772222						0.236789
0.872222						0.260069
0.972222						0.279894
1.07222						0.295673
1.17222						0.309746
1.27222						0.326624
1.37222						0.337467
1.47222						0.346983
1.57222						0.360947
1.67222						0.371219
1.77222						0.378413
1.87222						0.389961
1.97222						0.40043
2.07222						0.404541
2.17222						0.417384
2.27222						0.423446
2.37222						0.434295
2.47222						0.443047
2.57222						0.453091
2.67222						0.458155
2.77222						0.468036
2.87222						0.477892
2.97222						0.483854
3.07222						0.490787
3.17222						0.498795
3.27222						0.505406
3.37222						0.510491
3.47222						0.521222
3.57222						0.523647
3.67222						0.533224
3.77222						0.541007
3.87222						0.54615
3.97222						0.549844
4.07222						0.557135
4.17222						0.565835
4.27222						0.566494
4.37222						0.578017
4.47222						0.582109
4.57222						0.588271
4.67222						0.590445
4.77222						0.594488
4.87222						0.59943
4.97222						0.606691
5.07222						0.607914
5.17222						0.61696
5.27222						0.616566
5.37222						0.619252
5.47222						0.627287
5.57222						0.632861
5.67222						0.631901
5.77222						0.641129
5.87222						0.637065
5.97222						0.647865
6.07222						0.649738
6.17222						0.648488
6.27222						0.650974
6.37222						0.655303
6.47222						0.656969
6.57222						0.659962
6.67222						0.663881
6.77222						0.665062
6.87222						0.663265
6.97222						0.668738
7.07222						0.669512
7.17222						0.673188
7.27222						0.674979
7.37222						0.676734
7.47222						0.678704
7.57222						0.682058
7.67222						0.68608
7.77222						0.684286
7.87222						0.683816
7.97222						0.693265
8.07222						0.693636
8.17222						0.693593
8.27222						0.694744
8.37222						0.693875
8.47222						0.699576
8.57222						0.700414
8.67222						0.702633
8.77222						0.702697
8.87222						0.697205
8.97222						0.702005
9.07222						0.706024
9.17222						0.706142
9.27222						0.708112
9.37222						0.706998
9.47222						0.709038
9.57222						0.712817
9.67222						0.712438
9.77222						0.710061
9.87222						0.715209
9.97222						0.717869
10.0722						0.716235
10.1722						0.715161
10.2722						0.717862
10.3722						0.71945
10.4722						0.718876
10.5722						0.717957
10.6722						0.722546
10.7722						0.72237
10.8722						0.723976
10.9722						0.721994
11.0722						0.721217
11.1722						0.722762
11.2722						0.726083
11.3722						0.725187
11.4722						0.723733
11.5722						0.723949
11.6722						0.725527
11.7722						0.727667
11.8722						0.726684
11.9722						0.726905
12.0722						0.726125
12.1722						0.729595
12.2722						0.730351
12.3722						0.731295
12.4722						0.726289
12.5722						0.729291
12.6722						0.731859
12.7722						0.731595
12.8722						0.724462
12.9722						0.728651
13.0722						0.730457
13.1722						0.733065
13.2722						0.733116
13.3722						0.733232
13.4722						0.73498
13.5722						0.731249
13.6722						0.732922
13.7722						0.731404
13.8722						0.731095
13.9722						0.737624
14.0722						0.735117
14.1722						0.733292
14.2722						0.736416
14.3722						0.736297
14.4722						0.736929
14.5722						0.734346
14.6722						0.736055
14.7722						0.738641
14.8722						0.735766
14.9722						0.740159
15.0722						0.732412
15.1722						0.734631
15.2722						0.734734
15.3722						0.736422
15.4722						0.739743
15.5722						0.733077
15.6722						0.73933
15.7722						0.739284
15.8722						0.733383
15.9722						0.73505
16.0722						0.73454
16.1722						0.733957
16.2722						0.737758
16.3722						0.731753
16.4722						0.736759
16.5722						0.742013
16.6722						0.733966
16.7722						0.737068
16.8722						0.734573
16.9722						0.738856
17.0722						0.736668
17.1722						0.735138
17.2722						0.737053
17.3722						0.738122
17.4722						0.736483
17.5722						0.733869
17.6722						0.736844
17.7722						0.733641
17.8722						0.736425
17.9722						0.730912
18.0722						0.735511
18.1722						0.734261
18.2722						0.729255
18.3722						0.73355
18.4722						0.73434
18.5722						0.733062
18.6722						0.73257
18.7722						0.73814
18.8722						0.73892
18.9722						0.734039
19.0722						0.734765
19.1722						0.730412
19.2722						0.731459
19.3722						0.733714
19.4722						0.730472
19.5722						0.735372
19.6722						0.728602
19.7722						0.732063
19.8722						0.728074
19.9722						0.730008
20.0722						0.729027
20.1722						0.73206
20.2722						0.728353
20.3722						0.730427
20.4722						0.730138
20.5722						0.726605
20.6722						0.726702
20.7722						0.72618
20.8722						0.72513
20.9722						0.732916
21.0722						0.731101
21.1722						0.72723
21.2722						0.724893
21.3722						0.729015
21.4722						0.727898
21.5722						0.726714
21.6722						0.725036
21.7722						0.724668
21.8722						0.730557
21.9722						0.723864
22.0722						0.72472
22.1722						0.723469
22.2722						0.72169
22.3722						0.7223
22.4722						0.721863
22.5722						0.725181
22.6722						0.717941
22.7722						0.722097
22.8722						0.723241
22.9722						0.719708
23.0722						0.719207
23.1722						0.720464
23.2722						0.717881
23.3722						0.719122
23.4722						0.716463
23.5722						0.713613
23.6722						0.716569
23.7722						0.718096
23.8722						0.714532
23.9722						0.717753
24.0722						0.714797
24.1722						0.712842
24.2722						0.713388
24.3722						0.711473
24.4722						0.717365
24.5722						0.714098
24.6722						0.710495
24.7722						0.710881
24.8722						0.711579
24.9722						0.711375
25.0722						0.714885
25.1722						0.709703
25.2722						0.710869
25.3722						0.710665
25.4722						0.706764
25.5722						0.710028
25.6722						0.709754
25.7722						0.710094
25.8722						0.705499
25.9722						0.707165
26.0722						0.706224
26.1722						0.703146
26.2722						0.705987
26.3722						0.705978
26.4722						0.708404
26.5722						0.703538
26.6722						0.708303
26.7722						0.703501
26.8722						0.706364
26.9722						0.701158
27.0722						0.703969
27.1722						0.698565
27.2722						0.702442
27.3722						0.696905
27.4722						0.700836
27.5722						0.700405
27.6722						0.699591
27.7722						0.702663
27.8722						0.697609
27.9722						0.696064
28.0722						0.701759
28.1722						0.693566
28.2722						0.696647
28.3722						0.697618
28.4722						0.689859
28.5722						0.693611
28.6722						0.691313
28.7722						0.697327
28.8722						0.694883
28.9722						0.692749
29.0722						0.691168
29.1722						0.690105
29.2722						0.691948
29.3722						0.689301
29.4722						0.688405
29.5722						0.690154
29.6722						0.683536
29.7722						0.689261
29.8722						0.686605
29.9722						0.681915
30.0722						0.686235
0.143333							0.022761
0.243333							0.043436
0.343333							0.074256
0.443333							0.11367
0.543333							0.161835
0.643333							0.21099
0.743333							0.265409
0.843333							0.315605
0.943333							0.3655
1.04333							0.413374
1.14333							0.459642
1.24333							0.497074
1.34333							0.535191
1.44333							0.569044
1.54333							0.601394
1.64333							0.635553
1.74333							0.667897
1.84333							0.686912
1.94333							0.711388
2.04333							0.736392
2.14333							0.75948
2.24333							0.775817
2.34333							0.800827
2.44333							0.815265
2.54333							0.838141
2.64333							0.852344
2.74333							0.866866
2.84333							0.886619
2.94333							0.898822
3.04333							0.909722
3.14333							0.929991
3.24333							0.947676
3.34333							0.958707
3.44333							0.971241
3.54333							0.985493
3.64333							0.997687
3.74333							1.0001
3.84333							1.01484
3.94333							1.02911
4.04333							1.03872
4.14333							1.05243
4.24333							1.05388
4.34333							1.06965
4.44333							1.07967
4.54333							1.0791
4.64333							1.09118
4.74333							1.0997
4.84333							1.10953
4.94333							1.1162
5.04333							1.12379
5.14333							1.12744
5.24333							1.13652
5.34333							1.14195
5.44333							1.15336
5.54333							1.15256
5.64333							1.1619
5.74333							1.16792
5.84333							1.17325
5.94333							1.17961
6.04333							1.18235
6.14333							1.1847
6.24333							1.18699
6.34333							1.19586
6.44333							1.19559
6.54333							1.207
6.64333							1.2028
6.74333							1.2141
6.84333							1.21686
6.94333							1.22581
7.04333							1.22516
7.14333							1.22677
7.24333							1.22782
7.34333							1.22973
7.44333							1.23113
7.54333							1.2408
7.64333							1.23964
7.74333							1.24662
7.84333							1.25091
7.94333							1.24501
8.04333							1.25247
8.14333							1.25165
8.24333							1.25338
8.34333							1.25873
8.44333							1.25737
8.54333							1.26104
8.64333							1.26128
8.74333							1.26026
8.84333							1.26782
8.94333							1.26697
9.04333							1.27574
9.14333							1.26906
9.24333							1.27207
9.34333							1.2709
9.44333							1.27559
9.54333							1.27649
9.64333							1.27849
9.74333							1.27846
9.84333							1.27926
9.94333							1.27788
10.0433							1.2828
10.1433							1.28082
10.2433							1.2827
10.3433							1.28263
10.4433							1.28927
10.5433							1.29029
10.6433							1.28637
10.7433							1.28938
10.8433							1.29463
10.9433							1.28622
11.0433							1.28855
11.1433							1.28791
11.2433							1.28414
11.3433							1.28782
11.4433							1.28652
11.5433							1.29081
11.6433							1.29072
11.7433							1.28339
11.8433							1.28787
11.9433							1.29228
12.0433							1.29767
12.1433							1.28697
12.2433							1.29129
12.3433							1.28747
12.4433							1.28789
12.5433							1.28945
12.6433							1.29161
12.7433							1.29222
12.8433							1.29464
12.9433							1.28966
13.0433							1.29259
13.1433							1.28718
13.2433							1.29146
13.3433							1.28908
13.4433							1.2878
13.5433							1.28808
13.6433							1.2903
13.7433							1.28861
13.8433							1.28779
13.9433							1.29426
14.0433							1.28632
14.1433							1.29084
14.2433							1.29018
14.3433							1.2903
14.4433							1.28594
14.5433							1.28944
14.6433							1.28473
14.7433							1.28209
14.8433							1.28411
14.9433							1.28253
15.0433							1.28152
15.1433							1.28302
15.2433							1.28432
15.3433							1.28124
15.4433							1.28352
15.5433							1.28243
15.6433							1.28312
15.7433							1.28052
15.8433							1.28324
15.9433							1.28297
16.0433							1.27823
16.1433							1.28203
16.2433							1.27935
16.3433							1.27754
16.4433							1.27355
16.5433							1.27718
16.6433							1.2774
16.7433							1.26975
16.8433							1.27144
16.9433							1.27492
17.0433							1.27098
17.1433							1.26614
17.2433							1.27379
17.3433							1.27144
17.4433							1.27393
17.5433							1.26646
17.6433							1.26733
17.7433							1.27135
17.8433							1.26497
17.9433							1.26891
18.0433							1.26432
18.1433							1.25974
18.2433							1.25782
18.3433							1.26486
18.4433							1.25821
18.5433							1.26209
18.6433							1.25698
18.7433							1.2587
18.8433							1.26368
18.9433							1.25829
19.0433							1.25845
19.1433							1.25025
19.2433							1.25328
19.3433							1.25286
19.4433							1.25071
19.5433							1.2524
19.6433							1.24514
19.7433							1.24904
19.8433							1.24321
19.9433							1.25007
[truncated: 2,801 more rows]

## Sheet: primary data -+val n=3
time	native	+8pos	+8neg	-8pos	-8neg	-17neg	-13pos	native +val	+8pos +val	+8neg +val	-8pos +val	-8neg +val	-17neg +val	-13pos +val
0.316667	0.099363
0.416667	0.153577
0.516667	0.214232
0.616667	0.272998
0.716667	0.329926
0.816667	0.379886
0.916667	0.425575
1.01667	0.465861
1.11667	0.489268
1.21667	0.527352
1.31667	0.545638
1.41667	0.575547
1.51667	0.589099
1.61667	0.611
1.71667	0.627605
1.81667	0.646567
1.91667	0.662195
2.01667	0.667378
2.11667	0.684648
2.21667	0.699937
2.31667	0.71404
2.41667	0.724223
2.51667	0.730964
2.61667	0.74687
2.71667	0.758425
2.81667	0.76417
2.91667	0.77322
3.01667	0.785764
3.11667	0.794646
3.21667	0.805221
3.31667	0.81443
3.41667	0.821673
3.51667	0.830495
3.61667	0.83875
3.71667	0.842031
3.81667	0.850625
3.91667	0.852799
4.01667	0.858267
4.11667	0.867286
4.21667	0.872427
4.31667	0.876325
4.41667	0.882024
4.51667	0.883667
4.61667	0.893595
4.71667	0.895884
4.81667	0.895698
4.91667	0.906344
5.01667	0.906899
5.11667	0.909147
5.21667	0.912979
5.31667	0.920017
5.41667	0.918177
5.51667	0.921109
5.61667	0.926641
5.71667	0.933272
5.81667	0.928383
5.91667	0.934478
6.01667	0.935664
6.11667	0.943071
6.21667	0.940497
6.31667	0.943349
6.41667	0.947577
6.51667	0.946155
6.61667	0.949501
6.71667	0.953931
6.81667	0.954995
6.91667	0.957132
7.01667	0.957722
7.11667	0.956718
7.21667	0.961144
7.31667	0.961083
7.41667	0.962566
7.51667	0.961988
7.61667	0.964535
7.71667	0.973733
7.81667	0.965653
7.91667	0.965543
8.01667	0.970844
8.11667	0.973045
8.21667	0.970859
8.31667	0.97492
8.41667	0.977844
8.51667	0.98276
8.61667	0.969927
8.71667	0.979167
8.81667	0.978262
8.91667	0.978064
9.01667	0.984893
9.11667	0.979323
9.21667	0.980676
9.31667	0.978984
9.41667	0.991099
9.51667	0.984684
9.61667	0.982836
9.71667	0.988943
9.81667	0.984517
9.91667	0.985821
10.0167	0.988099
10.1167	0.988825
10.2167	0.984186
10.3167	0.99181
10.4167	0.989452
10.5167	0.992422
10.6167	0.989049
10.7167	0.985749
10.8167	0.988262
10.9167	0.991551
11.0167	0.991532
11.1167	0.990574
11.2167	0.992144
11.3167	0.991217
11.4167	0.990429
11.5167	0.994011
11.6167	0.988901
11.7167	0.990848
11.8167	0.998395
11.9167	0.994654
12.0167	0.990057
12.1167	0.98668
12.2167	0.993711
12.3167	0.993992
12.4167	0.98992
12.5167	0.991532
12.6167	0.99395
12.7167	0.999506
12.8167	0.999433
12.9167	0.997749
13.0167	0.995871
13.1167	0.990186
13.2167	0.997989
13.3167	0.993384
13.4167	0.994114
13.5167	0.997342
13.6167	0.993711
13.7167	0.994871
13.8167	0.994992
13.9167	0.990384
14.0167	0.994403
14.1167	0.989004
14.2167	0.996627
14.3167	0.995106
14.4167	0.991585
14.5167	0.99095
14.6167	1
14.7167	0.992331
14.8167	0.99527
14.9167	0.991756
15.0167	0.98692
15.1167	0.992274
15.2167	0.994087
15.3167	0.993239
15.4167	0.986791
15.5167	0.989213
15.6167	0.991855
15.7167	0.993487
15.8167	0.994825
15.9167	0.989833
16.0167	0.987429
16.1167	0.986209
16.2167	0.983209
16.3167	0.992369
16.4167	0.99014
16.5167	0.986673
16.6167	0.986023
16.7167	0.993042
16.8167	0.993684
16.9167	0.988395
17.0167	0.986916
17.1167	0.989471
17.2167	0.984304
17.3167	0.987543
17.4167	0.985855
17.5167	0.987711
17.6167	0.988213
17.7167	0.987369
17.8167	0.984095
17.9167	0.987874
18.0167	0.984399
18.1167	0.981977
18.2167	0.987144
18.3167	0.988365
18.4167	0.983551
18.5167	0.985494
18.6167	0.989175
18.7167	0.985372
18.8167	0.984513
18.9167	0.982319
19.0167	0.984958
19.1167	0.986422
19.2167	0.979638
19.3167	0.98149
19.4167	0.982939
19.5167	0.9823
19.6167	0.981513
19.7167	0.977467
19.8167	0.986296
19.9167	0.981486
20.0167	0.982528
20.1167	0.979616
20.2167	0.979711
20.3167	0.97538
20.4167	0.980254
20.5167	0.970555
20.6167	0.980711
20.7167	0.977251
20.8167	0.978867
20.9167	0.977201
21.0167	0.973209
21.1167	0.974087
21.2167	0.968418
21.3167	0.974882
21.4167	0.974091
21.5167	0.972577
21.6167	0.970486
21.7167	0.971334
21.8167	0.973836
21.9167	0.977631
22.0167	0.970543
22.1167	0.970437
22.2167	0.972779
22.3167	0.968916
22.4167	0.971749
22.5167	0.970402
22.6167	0.969726
22.7167	0.967026
22.8167	0.970631
22.9167	0.969984
23.0167	0.970813
23.1167	0.967182
23.2167	0.96503
23.3167	0.967999
23.4167	0.970391
23.5167	0.967247
23.6167	0.961737
23.7167	0.965497
23.8167	0.970037
23.9167	0.9649
24.0167	0.965383
24.1167	0.965612
24.2167	0.959319
24.3167	0.961714
24.4167	0.961383
24.5167	0.963022
24.6167	0.963604
24.7167	0.964729
24.8167	0.961254
24.9167	0.959243
25.0167	0.963505
25.1167	0.96011
25.2167	0.962429
25.3167	0.965292
25.4167	0.966813
25.5167	0.95798
25.6167	0.958908
25.7167	0.95906
25.8167	0.956729
25.9167	0.958737
26.0167	0.958646
26.1167	0.959847
26.2167	0.959417
26.3167	0.955661
26.4167	0.955691
26.5167	0.956885
26.6167	0.956878
26.7167	0.960307
26.8167	0.955984
26.9167	0.955011
27.0167	0.953547
27.1167	0.958201
27.2167	0.950429
27.3167	0.95341
27.4167	0.952573
27.5167	0.957615
27.6167	0.952836
27.7167	0.955052
27.8167	0.954676
27.9167	0.953068
28.0167	0.954729
28.1167	0.953311
28.2167	0.951315
28.3167	0.947805
28.4167	0.946379
28.5167	0.950676
28.6167	0.945109
28.7167	0.95228
28.8167	0.946969
28.9167	0.951185
29.0167	0.951117
29.1167	0.948813
29.2167	0.948345
29.3167	0.944592
29.4167	0.949478
29.5167	0.94087
29.6167	0.941497
29.7167	0.938584
29.8167	0.946178
29.9167	0.94371
30.0167	0.946573
30.1167	0.941763
30.2167	0.944565
0.287778		0.099101
0.387778		0.134862
0.487778		0.169022
0.587778		0.198821
0.687778		0.2277
0.787778		0.256765
0.887778		0.281496
0.987778		0.309074
1.08778		0.326596
1.18778		0.353155
1.28778		0.374011
1.38778		0.397791
1.48778		0.416247
1.58778		0.432921
1.68778		0.456404
1.78778		0.468286
1.88778		0.486652
1.98778		0.50688
2.08778		0.522082
2.18778		0.539261
2.28778		0.556087
2.38778		0.5686
2.48778		0.583505
2.58778		0.599844
2.68778		0.610833
2.78778		0.625605
2.88778		0.640955
2.98778		0.649191
3.08778		0.661423
3.18778		0.671507
3.28778		0.686024
3.38778		0.695135
3.48778		0.703067
3.58778		0.720052
3.68778		0.723683
3.78778		0.72958
3.88778		0.748086
3.98778		0.753045
4.08778		0.755657
4.18778		0.770174
4.28778		0.771927
4.38778		0.781889
4.48778		0.789315
4.58778		0.792574
4.68778		0.802818
4.78778		0.806171
4.88778		0.80619
4.98778		0.815373
5.08778		0.823753
5.18778		0.824597
5.28778		0.830852
5.38778		0.833643
5.48778		0.839229
5.58778		0.839613
5.68778		0.850571
5.78778		0.845982
5.88778		0.852526
5.98778		0.855066
6.08778		0.860518
6.18778		0.860952
6.28778		0.862952
6.38778		0.86991
6.48778		0.871963
6.58778		0.871374
6.68778		0.869328
6.78778		0.876207
6.88778		0.875108
6.98778		0.883956
7.08778		0.879503
7.18778		0.884758
7.28778		0.888621
7.38778		0.889933
7.48778		0.887743
7.58778		0.892793
7.68778		0.891199
7.78778		0.891869
7.88778		0.898215
7.98778		0.899276
8.08778		0.897177
8.18778		0.892987
8.28778		0.902504
8.38778		0.894584
8.48778		0.897622
8.58778		0.903112
8.68778		0.901987
8.78778		0.903481
8.88778		0.901702
8.98778		0.903443
9.08778		0.906645
9.18778		0.902835
9.28778		0.909223
9.38778		0.908078
9.48778		0.909493
9.58778		0.908417
9.68778		0.911972
9.78778		0.90993
9.88778		0.914101
9.98778		0.916641
10.0878		0.915603
10.1878		0.912588
10.2878		0.912386
10.3878		0.910405
10.4878		0.914664
10.5878		0.917934
10.6878		0.914915
10.7878		0.914728
10.8878		0.915812
10.9878		0.917147
11.0878		0.918736
11.1878		0.919162
11.2878		0.917447
11.3878		0.923812
11.4878		0.917599
11.5878		0.917816
11.6878		0.918592
11.7878		0.920196
11.8878		0.926478
11.9878		0.921299
12.0878		0.922242
12.1878		0.923949
12.2878		0.923474
12.3878		0.922949
12.4878		0.921542
12.5878		0.929641
12.6878		0.922538
12.7878		0.921968
12.8878		0.924816
12.9878		0.926968
13.0878		0.920481
13.1878		0.923603
13.2878		0.927204
13.3878		0.923942
13.4878		0.926185
13.5878		0.929683
13.6878		0.929212
13.7878		0.926972
13.8878		0.926462
13.9878		0.929816
14.0878		0.924109
14.1878		0.922618
14.2878		0.927649
14.3878		0.923485
14.4878		0.930432
14.5878		0.921729
14.6878		0.932006
14.7878		0.927987
14.8878		0.923588
14.9878		0.927238
15.0878		0.927143
15.1878		0.924006
15.2878		0.927504
15.3878		0.926835
15.4878		0.927618
15.5878		0.927645
15.6878		0.924424
15.7878		0.923192
15.8878		0.925611
15.9878		0.926607
16.0878		0.925166
16.1878		0.931812
16.2878		0.921968
16.3878		0.923345
16.4878		0.924238
16.5878		0.930588
16.6878		0.921736
16.7878		0.920542
16.8878		0.925071
16.9878		0.923189
17.0878		0.924002
17.1878		0.921846
17.2878		0.926744
17.3878		0.9215
17.4878		0.926607
17.5878		0.927037
17.6878		0.919584
17.7878		0.918592
17.8878		0.924219
17.9878		0.916493
18.0878		0.913169
18.1878		0.92331
18.2878		0.91604
18.3878		0.9209
18.4878		0.91628
18.5878		0.919344
18.6878		0.919903
18.7878		0.921379
18.8878		0.919546
18.9878		0.917744
19.0878		0.915763
19.1878		0.918793
19.2878		0.916812
19.3878		0.912527
19.4878		0.912131
19.5878		0.917694
19.6878		0.915595
19.7878		0.916816
19.8878		0.916055
19.9878		0.909899
20.0878		0.91609
20.1878		0.91296
20.2878		0.911021
20.3878		0.912249
20.4878		0.911352
20.5878		0.907686
20.6878		0.907797
20.7878		0.912519
20.8878		0.907302
20.9878		0.911823
21.0878		0.910683
21.1878		0.904603
21.2878		0.908637
21.3878		0.909032
21.4878		0.902337
21.5878		0.902945
21.6878		0.906956
21.7878		0.910899
21.8878		0.912534
21.9878		0.904569
22.0878		0.906686
22.1878		0.903416
22.2878		0.899797
22.3878		0.904531
22.4878		0.901549
22.5878		0.90258
22.6878		0.90088
22.7878		0.901352
22.8878		0.899686
22.9878		0.895568
23.0878		0.893895
23.1878		0.896774
23.2878		0.893059
23.3878		0.8955
23.4878		0.896431
23.5878		0.893838
23.6878		0.899816
23.7878		0.891774
23.8878		0.890287
23.9878		0.89242
24.0878		0.893059
24.1878		0.891177
24.2878		0.89272
24.3878		0.89288
24.4878		0.891386
24.5878		0.891876
24.6878		0.890458
24.7878		0.891701
24.8878		0.885572
24.9878		0.890051
25.0878		0.887386
25.1878		0.885694
25.2878		0.887218
25.3878		0.884435
25.4878		0.884291
25.5878		0.885781
25.6878		0.884496
25.7878		0.882659
25.8878		0.882017
25.9878		0.88318
26.0878		0.882979
26.1878		0.878214
26.2878		0.880534
26.3878		0.879697
26.4878		0.879097
26.5878		0.881716
26.6878		0.875519
26.7878		0.874842
26.8878		0.878207
26.9878		0.871302
27.0878		0.883336
27.1878		0.878393
27.2878		0.875747
27.3878		0.874321
27.4878		0.871929
27.5878		0.87191
27.6878		0.870534
27.7878		0.872222
27.8878		0.867545
27.9878		0.86953
28.0878		0.868762
28.1878		0.867594
28.2878		0.868572
28.3878		0.868199
28.4878		0.863746
28.5878		0.867632
28.6878		0.860206
28.7878		0.864522
28.8878		0.863442
28.9878		0.866522
29.0878		0.861648
29.1878		0.861381
29.2878		0.860575
29.3878		0.858454
29.4878		0.868868
29.5878		0.857666
29.6878		0.856758
29.7878		0.861648
29.8878		0.857613
29.9878		0.854229
30.0878		0.856066
30.1878		0.857488
0.258889			0.027886
0.358889			0.039126
0.458889			0.054887
0.558889			0.072655
0.658889			0.095876
0.758889			0.117451
0.858889			0.14306
0.958889			0.171399
1.05889			0.199418
1.15889			0.224179
1.25889			0.253415
1.35889			0.283538
1.45889			0.313284
1.55889			0.336676
1.65889			0.364391
1.75889			0.390962
1.85889			0.416514
1.95889			0.439499
2.05889			0.46086
2.15889			0.481716
2.25889			0.505698
2.35889			0.528721
2.45889			0.547143
2.55889			0.561931
2.65889			0.581931
2.75889			0.60119
2.85889			0.617578
2.95889			0.628601
3.05889			0.648012
3.15889			0.66526
3.25889			0.683926
3.35889			0.697701
3.45889			0.710424
3.55889			0.722755
3.65889			0.73509
3.75889			0.749984
3.85889			0.761954
3.95889			0.770372
4.05889			0.783965
4.15889			0.796601
4.25889			0.810612
4.35889			0.818799
4.45889			0.827316
4.55889			0.83762
4.65889			0.845666
4.75889			0.856952
4.85889			0.864556
4.95889			0.877796
5.05889			0.883408
5.15889			0.894466
5.25889			0.905766
5.35889			0.914835
5.45889			0.919934
5.55889			0.930683
5.65889			0.930079
5.75889			0.940733
5.85889			0.948299
5.95889			0.951577
6.05889			0.961022
6.15889			0.968338
6.25889			0.975935
6.35889			0.984228
6.45889			0.990954
6.55889			0.995232
6.65889			0.997802
6.75889			1.00474
6.85889			1.01161
6.95889			1.01827
7.05889			1.02004
7.15889			1.03229
7.25889			1.03568
7.35889			1.03665
7.45889			1.04787
7.55889			1.05036
7.65889			1.05264
7.75889			1.05461
7.85889			1.06156
7.95889			1.06535
8.05889			1.06723
8.15889			1.07258
8.25889			1.07559
8.35889			1.0775
8.45889			1.08208
8.55889			1.08654
8.65889			1.09542
8.75889			1.0934
8.85889			1.10101
8.95889			1.10583
9.05889			1.10756
9.15889			1.10807
9.25889			1.11211
9.35889			1.11542
9.45889			1.1134
9.55889			1.11681
9.65889			1.12234
9.75889			1.12787
9.85889			1.13016
9.95889			1.13047
10.0589			1.13337
10.1589			1.14082
10.2589			1.14112
10.3589			1.14319
10.4589			1.14106
10.5589			1.15027
10.6589			1.14795
10.7589			1.15181
10.8589			1.14825
10.9589			1.1584
11.0589			1.15889
11.1589			1.15563
11.2589			1.15656
11.3589			1.16077
11.4589			1.16524
11.5589			1.16946
11.6589			1.16722
11.7589			1.17296
11.8589			1.17837
11.9589			1.17532
12.0589			1.17442
12.1589			1.17487
12.2589			1.17813
12.3589			1.17819
12.4589			1.18095
12.5589			1.18074
12.6589			1.17983
12.7589			1.18348
12.8589			1.18446
12.9589			1.19016
13.0589			1.18237
13.1589			1.18268
13.2589			1.18991
13.3589			1.18717
13.4589			1.19238
13.5589			1.19119
13.6589			1.18951
13.7589			1.19211
13.8589			1.19621
13.9589			1.19206
14.0589			1.19249
14.1589			1.19762
14.2589			1.19377
14.3589			1.2002
14.4589			1.20685
14.5589			1.18932
14.6589			1.20091
14.7589			1.19063
14.8589			1.19352
14.9589			1.19996
15.0589			1.20125
15.1589			1.2013
15.2589			1.20063
15.3589			1.20288
15.4589			1.19829
15.5589			1.20715
15.6589			1.2016
15.7589			1.20074
15.8589			1.20554
15.9589			1.2019
16.0589			1.20932
16.1589			1.20705
16.2589			1.20448
16.3589			1.2001
16.4589			1.20471
16.5589			1.20022
16.6589			1.20809
16.7589			1.20584
16.8589			1.2066
16.9589			1.20397
17.0589			1.20957
17.1589			1.20791
17.2589			1.20863
17.3589			1.20554
17.4589			1.20355
17.5589			1.20839
17.6589			1.20676
17.7589			1.21784
17.8589			1.20903
17.9589			1.20362
18.0589			1.20156
18.1589			1.20801
18.2589			1.20992
18.3589			1.20179
18.4589			1.21127
18.5589			1.20476
18.6589			1.20318
18.7589			1.19922
18.8589			1.20569
18.9589			1.20755
19.0589			1.20745
19.1589			1.20426
19.2589			1.20617
19.3589			1.20236
19.4589			1.2091
19.5589			1.20561
19.6589			1.20365
19.7589			1.20801
19.8589			1.20231
19.9589			1.19755
20.0589			1.20636
20.1589			1.2031
20.2589			1.2029
20.3589			1.20409
20.4589			1.20368
20.5589			1.2032
20.6589			1.19801
20.7589			1.20551
20.8589			1.20138
20.9589			1.20092
21.0589			1.20315
21.1589			1.20481
21.2589			1.19995
21.3589			1.20161
21.4589			1.19786
21.5589			1.20224
21.6589			1.19635
21.7589			1.1948
21.8589			1.19857
21.9589			1.1983
22.0589			1.1968
22.1589			1.19828
22.2589			1.2017
22.3589			1.19426
22.4589			1.19379
22.5589			1.19606
22.6589			1.18461
22.7589			1.19748
22.8589			1.19295
22.9589			1.18832
23.0589			1.19139
23.1589			1.19265
23.2589			1.19034
23.3589			1.18892
23.4589			1.18698
23.5589			1.18735
23.6589			1.18938
23.7589			1.18225
23.8589			1.18672
23.9589			1.18792
24.0589			1.18578
24.1589			1.17408
24.2589			1.18468
24.3589			1.182
24.4589			1.18039
24.5589			1.19031
24.6589			1.17954
24.7589			1.1807
24.8589			1.18081
24.9589			1.18227
25.0589			1.18068
25.1589			1.1837
25.2589			1.18089
25.3589			1.17266
25.4589			1.18094
25.5589			1.18139
25.6589			1.17445
25.7589			1.17983
25.8589			1.17409
25.9589			1.17042
26.0589			1.17309
26.1589			1.1721
26.2589			1.16929
26.3589			1.17267
26.4589			1.1698
26.5589			1.1661
26.6589			1.17042
26.7589			1.16878
26.8589			1.16831
26.9589			1.1576
27.0589			1.16591
27.1589			1.16417
27.2589			1.16825
27.3589			1.16494
27.4589			1.16373
27.5589			1.16038
27.6589			1.15485
27.7589			1.16415
27.8589			1.15885
27.9589			1.15873
28.0589			1.16292
28.1589			1.15633
28.2589			1.15613
28.3589			1.15836
28.4589			1.15807
28.5589			1.15331
28.6589			1.15757
28.7589			1.15481
28.8589			1.15261
28.9589			1.14806
29.0589			1.14521
29.1589			1.15499
29.2589			1.14883
29.3589			1.15065
29.4589			1.14917
29.5589			1.14584
29.6589			1.14073
29.7589			1.14878
29.8589			1.14574
29.9589			1.14163
30.0589			1.14338
30.1589			1.13824
0.23				0.049377
0.33				0.079941
0.43				0.11604
0.53				0.158969
0.63				0.203513
0.73				0.246526
0.83				0.293622
0.93				0.329694
1.03				0.376809
1.13				0.414985
1.23				0.445385
1.33				0.480435
1.43				0.514379
1.53				0.54806
1.63				0.570387
1.73				0.598593
1.83				0.623997
1.93				0.644252
2.03				0.671039
2.13				0.695686
2.23				0.712238
2.33				0.725797
2.43				0.75433
2.53				0.764737
2.63				0.780927
2.73				0.800266
2.83				0.813495
2.93				0.830122
3.03				0.843605
3.13				0.856857
3.23				0.870484
3.33				0.889306
3.43				0.895089
3.53				0.905032
3.63				0.925436
3.73				0.93166
3.83				0.940828
3.93				0.952912
4.03				0.964779
4.13				0.970296
4.23				0.981277
4.33				0.989901
4.43				1.00323
4.53				1.00623
4.63				1.01803
4.73				1.01751
4.83				1.02545
4.93				1.03434
5.03				1.04526
5.13				1.04975
5.23				1.05264
5.33				1.06409
5.43				1.06467
5.53				1.07447
5.63				1.07479
5.73				1.08421
5.83				1.08674
5.93				1.09679
6.03				1.09817
6.13				1.10274
6.23				1.1108
6.33				1.10979
6.43				1.11292
6.53				1.11927
6.63				1.12565
6.73				1.1298
6.83				1.13177
6.93				1.13389
7.03				1.13264
7.13				1.14085
7.23				1.14268
7.33				1.14308
7.43				1.14934
7.53				1.1472
7.63				1.14995
7.73				1.1531
7.83				1.15725
7.93				1.16974
8.03				1.16449
8.13				1.17159
8.23				1.16664
8.33				1.17101
8.43				1.16995
8.53				1.16844
8.63				1.17019
8.73				1.17637
8.83				1.17725
8.93				1.17688
9.03				1.18081
9.13				1.18417
9.23				1.1855
9.33				1.18802
9.43				1.18603
9.53				1.18913
9.63				1.19017
9.73				1.1947
9.83				1.1889
9.93				1.19055
10.03				1.1914
10.13				1.19384
10.23				1.19697
10.33				1.19489
10.43				1.18914
10.53				1.19621
10.63				1.20032
10.73				1.20101
10.83				1.19959
10.93				1.20352
11.03				1.19864
11.13				1.20109
11.23				1.20527
11.33				1.20149
11.43				1.20492
11.53				1.20752
11.63				1.21105
11.73				1.20347
11.83				1.20067
11.93				1.20216
12.03				1.20765
12.13				1.19917
12.23				1.20432
12.33				1.20451
12.43				1.21013
12.53				1.20967
12.63				1.20681
12.73				1.2114
12.83				1.20771
12.93				1.20765
13.03				1.20944
13.13				1.20277
13.23				1.20838
13.33				1.21094
13.43				1.20481
13.53				1.20894
13.63				1.20612
13.73				1.20948
13.83				1.20729
13.93				1.21352
14.03				1.20859
14.13				1.20468
14.23				1.20824
14.33				1.20777
14.43				1.20587
14.53				1.20956
14.63				1.20413
14.73				1.20955
14.83				1.20352
14.93				1.20705
15.03				1.20812
15.13				1.20984
15.23				1.20129
15.33				1.20581
15.43				1.19932
15.53				1.20761
15.63				1.19999
15.73				1.20487
15.83				1.20536
15.93				1.20257
16.03				1.20365
16.13				1.20564
16.23				1.19901
16.33				1.20156
16.43				1.20406
16.53				1.20233
16.63				1.21058
16.73				1.20184
16.83				1.20444
16.93				1.20254
17.03				1.19868
17.13				1.2014
17.23				1.20642
17.33				1.1977
17.43				1.20178
17.53				1.1966
17.63				1.20205
17.73				1.20314
17.83				1.19588
17.93				1.19329
18.03				1.19307
18.13				1.19446
18.23				1.19878
18.33				1.19037
18.43				1.18683
18.53				1.19407
18.63				1.19173
18.73				1.19173
18.83				1.20172
18.93				1.19629
19.03				1.18975
19.13				1.18449
19.23				1.19002
19.33				1.19007
19.43				1.18772
19.53				1.18733
19.63				1.18453
19.73				1.18277
19.83				1.18529
19.93				1.18229
20.03				1.18516
20.13				1.18388
20.23				1.18173
20.33				1.17887
20.43				1.17793
20.53				1.17634
20.63				1.18048
20.73				1.1786
20.83				1.17411
20.93				1.17903
21.03				1.17694
21.13				1.17074
21.23				1.17517
21.33				1.17531
21.43				1.17141
21.53				1.1681
21.63				1.17246
21.73				1.16755
21.83				1.17097
21.93				1.16791
22.03				1.15711
22.13				1.16908
22.23				1.16436
22.33				1.16922
22.43				1.16509
22.53				1.16535
22.63				1.15917
22.73				1.16192
22.83				1.1636
22.93				1.16054
23.03				1.16237
23.13				1.1583
23.23				1.16029
23.33				1.15437
23.43				1.15762
23.53				1.15699
23.63				1.15363
23.73				1.15474
23.83				1.14607
23.93				1.14695
24.03				1.14752
24.13				1.15201
24.23				1.1524
24.33				1.14753
24.43				1.14565
24.53				1.15075
24.63				1.15019
24.73				1.14482
24.83				1.1432
24.93				1.1421
25.03				1.143
25.13				1.14589
25.23				1.13787
25.33				1.13537
25.43				1.13805
25.53				1.13786
25.63				1.14245
25.73				1.1351
25.83				1.13616
25.93				1.13976
26.03				1.13648
26.13				1.12877
26.23				1.13674
26.33				1.13516
26.43				1.13798
26.53				1.1314
26.63				1.127
26.73				1.1283
26.83				1.12941
26.93				1.12514
27.03				1.12722
27.13				1.1261
27.23				1.12465
27.33				1.12325
27.43				1.12204
27.53				1.11668
27.63				1.12387
27.73				1.12075
27.83				1.12458
27.93				1.11672
28.03				1.10996
28.13				1.12464
28.23				1.1109
28.33				1.1155
28.43				1.11563
28.53				1.11235
28.63				1.10928
28.73				1.11166
28.83				1.11327
28.93				1.11208
29.03				1.11501
29.13				1.10963
29.23				1.10548
29.33				1.10787
29.43				1.11037
29.53				1.10104
29.63				1.10587
29.73				1.10319
29.83				1.09928
29.93				1.10686
30.03				1.10045
30.13				1.10087
0.201111					0.060218
0.301111					0.114976
0.401111					0.164665
0.501111					0.206821
0.601111					0.24445
0.701111					0.272218
0.801111					0.300386
0.901111					0.323801
1.00111					0.347026
1.10111					0.361167
1.20111					0.383886
1.30111					0.400141
1.40111					0.416236
1.50111					0.434126
1.60111					0.446929
1.70111					0.464207
1.80111					0.474868
1.90111					0.487504
2.00111					0.500124
2.10111					0.515744
2.20111					0.522816
2.30111					0.537782
2.40111					0.548124
2.50111					0.556493
2.60111					0.568574
2.70111					0.579285
2.80111					0.581224
2.90111					0.59092
3.00111					0.600795
3.10111					0.603977
3.20111					0.618054
3.30111					0.621974
3.40111					0.630601
3.50111					0.637959
3.60111					0.644354
3.70111					0.648902
3.80111					0.654415
3.90111					0.656575
4.00111					0.666636
4.10111					0.669378
4.20111					0.674553
4.30111					0.682895
4.40111					0.682009
4.50111					0.687306
4.60111					0.689891
4.70111					0.69807
4.80111					0.701318
4.90111					0.702584
5.00111					0.707074
5.10111					0.707641
5.20111					0.713553
5.30111					0.718535
5.40111					0.722481
5.50111					0.726816
5.60111					0.731451
5.70111					0.72855
5.80111					0.731695
5.90111					0.735402
6.00111					0.739212
6.10111					0.743873
6.20111					0.739957
6.30111					0.745607
6.40111					0.747105
6.50111					0.751683
6.60111					0.750041
6.70111					0.751699
6.80111					0.755383
6.90111					0.76084
7.00111					0.758315
7.10111					0.760151
7.20111					0.761026
7.30111					0.76087
7.40111					0.766817
7.50111					0.764007
7.60111					0.771049
7.70111					0.769543
7.80111					0.767364
7.90111					0.773456
8.00111					0.770825
8.10111					0.775581
8.20111					0.77576
8.30111					0.774615
8.40111					0.774707
8.50111					0.781228
8.60111					0.773756
8.70111					0.781676
8.80111					0.785551
8.90111					0.783772
9.00111					0.781285
9.10111					0.790198
9.20111					0.783555
9.30111					0.780581
9.40111					0.78419
9.50111					0.788399
9.60111					0.785768
9.70111					0.789376
9.80111					0.790924
9.90111					0.790342
10.0011					0.795201
10.1011					0.789931
10.2011					0.791521
10.3011					0.789391
10.4011					0.790049
10.5011					0.792239
10.6011					0.793015
10.7011					0.7953
10.8011					0.791007
10.9011					0.796563
11.0011					0.798106
11.1011					0.793977
11.2011					0.798236
11.3011					0.79346
11.4011					0.79576
11.5011					0.797456
11.6011					0.795114
11.7011					0.801559
11.8011					0.800973
11.9011					0.796205
12.0011					0.79692
12.1011					0.796319
12.2011					0.800376
12.3011					0.795205
12.4011					0.793304
12.5011					0.797008
12.6011					0.800681
12.7011					0.799441
12.8011					0.797977
12.9011					0.792487
13.0011					0.80311
13.1011					0.799065
13.2011					0.799916
13.3011					0.796547
13.4011					0.794745
13.5011					0.798764
13.6011					0.797373
13.7011					0.800954
13.8011					0.79689
13.9011					0.796684
14.0011					0.800715
14.1011					0.796274
14.2011					0.794449
14.3011					0.79976
14.4011					0.801114
14.5011					0.79811
14.6011					0.797175
14.7011					0.797076
14.8011					0.799202
14.9011					0.794661
15.0011					0.796696
15.1011					0.802164
15.2011					0.802582
15.3011					0.798909
15.4011					0.796475
15.5011					0.798513
15.6011					0.796319
15.7011					0.797494
15.8011					0.795141
15.9011					0.792677
16.0011					0.795776
16.1011					0.796004
16.2011					0.793958
16.3011					0.796783
16.4011					0.795433
16.5011					0.798662
16.6011					0.794654
16.7011					0.795171
16.8011					0.797684
16.9011					0.795806
17.0011					0.797323
17.1011					0.797913
17.2011					0.788817
17.3011					0.792308
17.4011					0.794452
17.5011					0.794924
17.6011					0.792057
17.7011					0.79435
17.8011					0.793623
17.9011					0.790369
18.0011					0.795403
18.1011					0.793289
18.2011					0.792867
18.3011					0.792331
18.4011					0.790661
18.5011					0.789334
18.6011					0.792699
18.7011					0.790981
18.8011					0.791517
18.9011					0.794411
19.0011					0.786589
19.1011					0.792057
19.2011					0.789589
19.3011					0.784357
19.4011					0.788574
19.5011					0.785912
19.6011					0.782076
19.7011					0.790118
19.8011					0.786464
19.9011					0.788015
20.0011					0.786148
20.1011					0.78946
20.2011					0.783163
20.3011					0.786296
20.4011					0.786235
20.5011					0.781216
20.6011					0.782798
20.7011					0.781935
20.8011					0.783829
20.9011					0.78457
21.0011					0.781581
21.1011					0.779813
21.2011					0.781464
21.3011					0.780406
21.4011					0.777817
21.5011					0.780939
21.6011					0.779756
21.7011					0.778053
21.8011					0.779528
21.9011					0.776825
22.0011					0.78192
22.1011					0.778555
22.2011					0.774969
22.3011					0.774608
22.4011					0.776924
22.5011					0.780935
22.6011					0.779433
22.7011					0.773935
22.8011					0.773452
22.9011					0.772182
23.0011					0.772292
23.1011					0.775635
23.2011					0.770364
23.3011					0.773555
23.4011					0.769809
23.5011					0.776007
23.6011					0.769349
23.7011					0.771098
23.8011					0.770482
23.9011					0.769615
24.0011					0.771775
24.1011					0.766912
24.2011					0.771037
24.3011					0.773946
24.4011					0.770182
24.5011					0.766889
24.6011					0.770908
24.7011					0.766357
24.8011					0.76571
24.9011					0.766836
25.0011					0.762642
25.1011					0.766684
25.2011					0.769775
25.3011					0.765224
25.4011					0.766524
25.5011					0.760098
25.6011					0.763338
25.7011					0.761087
25.8011					0.765319
25.9011					0.762737
26.0011					0.757729
26.1011					0.761303
26.2011					0.759011
26.3011					0.762475
26.4011					0.75509
26.5011					0.76063
26.6011					0.754687
26.7011					0.759372
26.8011					0.758782
26.9011					0.759417
27.0011					0.756497
27.1011					0.752478
27.2011					0.754554
27.3011					0.754436
27.4011					0.752056
27.5011					0.753516
27.6011					0.756269
27.7011					0.754087
27.8011					0.751733
27.9011					0.757178
28.0011					0.753246
28.1011					0.752634
28.2011					0.748714
28.3011					0.748105
28.4011					0.750193
28.5011					0.747816
28.6011					0.752448
28.7011					0.749798
28.8011					0.745033
28.9011					0.748661
29.0011					0.750455
29.1011					0.745372
29.2011					0.748254
29.3011					0.74433
29.4011					0.744128
29.5011					0.744159
29.6011					0.744429
29.7011					0.743927
29.8011					0.743581
29.9011					0.743546
30.0011					0.742467
30.1011					0.741143
0.172222						0.066689
0.272222						0.108029
0.372222						0.14495
0.472222						0.182201
0.572222						0.220483
0.672222						0.249902
0.772222						0.278576
0.872222						0.302097
0.972222						0.32617
1.07222						0.341847
1.17222						0.355919
1.27222						0.368144
1.37222						0.379182
1.47222						0.3893
1.57222						0.397669
1.67222						0.409453
1.77222						0.411411
1.87222						0.419841
1.97222						0.423346
2.07222						0.435419
2.17222						0.438906
2.27222						0.442906
2.37222						0.453123
2.47222						0.461499
2.57222						0.466313
2.67222						0.470328
2.77222						0.473834
2.87222						0.478979
2.97222						0.487458
3.07222						0.491089
3.17222						0.499751
3.27222						0.502013
3.37222						0.503626
3.47222						0.509052
3.57222						0.515649
3.67222						0.523945
3.77222						0.524892
3.87222						0.530615
3.97222						0.537927
4.07222						0.541851
4.17222						0.546585
4.27222						0.54782
4.37222						0.553794
4.47222						0.557246
4.57222						0.560653
4.67222						0.566897
4.77222						0.568064
4.87222						0.572749
4.97222						0.576874
5.07222						0.580616
5.17222						0.585817
5.27222						0.587194
5.37222						0.590388
5.47222						0.591703
5.57222						0.600411
5.67222						0.602434
5.77222						0.604069
5.87222						0.607369
5.97222						0.607202
6.07222						0.610015
6.17222						0.616955
6.27222						0.616054
6.37222						0.618898
6.47222						0.623384
6.57222						0.625628
6.67222						0.627309
6.77222						0.628959
6.87222						0.635065
6.97222						0.634472
7.07222						0.636837
7.17222						0.634761
7.27222						0.638423
7.37222						0.64091
7.47222						0.646921
7.57222						0.648944
7.67222						0.646708
7.77222						0.64637
7.87222						0.653944
7.97222						0.653815
8.07222						0.657822
8.17222						0.654628
8.27222						0.660446
8.37222						0.664138
8.47222						0.663564
8.57222						0.664157
8.67222						0.666925
8.77222						0.666994
8.87222						0.667823
8.97222						0.671473
9.07222						0.67045
9.17222						0.678606
9.27222						0.672408
9.37222						0.676484
9.47222						0.675545
9.57222						0.674754
9.67222						0.680906
9.77222						0.68442
9.87222						0.683903
9.97222						0.679325
10.0722						0.68261
10.1722						0.685758
10.2722						0.686066
10.3722						0.685405
10.4722						0.689857
10.5722						0.68877
10.6722						0.690051
10.7722						0.693671
10.8722						0.692051
10.9722						0.692336
11.0722						0.690903
11.1722						0.694732
11.2722						0.691009
11.3722						0.694405
11.4722						0.697181
11.5722						0.696314
11.6722						0.698557
11.7722						0.699823
11.8722						0.701652
11.9722						0.696686
12.0722						0.701329
12.1722						0.700188
12.2722						0.701124
12.3722						0.699949
12.4722						0.703926
12.5722						0.698663
12.6722						0.708763
12.7722						0.704032
12.8722						0.707527
12.9722						0.708143
13.0722						0.705089
13.1722						0.709295
13.2722						0.703036
13.3722						0.711534
13.4722						0.70993
13.5722						0.709181
13.6722						0.711299
13.7722						0.708477
13.8722						0.709025
13.9722						0.709268
14.0722						0.713576
14.1722						0.707896
14.2722						0.711458
14.3722						0.712341
14.4722						0.711257
14.5722						0.714246
14.6722						0.714668
14.7722						0.710785
14.8722						0.708188
14.9722						0.712135
15.0722						0.711306
15.1722						0.709496
15.2722						0.710519
15.3722						0.714527
15.4722						0.712314
15.5722						0.716671
15.6722						0.713801
15.7722						0.714382
15.8722						0.712238
15.9722						0.713101
16.0722						0.714812
16.1722						0.709846
16.2722						0.712938
16.3722						0.719459
16.4722						0.717044
16.5722						0.711093
16.6722						0.712938
16.7722						0.717907
16.8722						0.714991
16.9722						0.721911
17.0722						0.720025
17.1722						0.710751
17.2722						0.717497
17.3722						0.712367
17.4722						0.719497
17.5722						0.713295
17.6722						0.715189
17.7722						0.717253
17.8722						0.71547
17.9722						0.713382
18.0722						0.714592
18.1722						0.71201
18.2722						0.710576
18.3722						0.710854
18.4722						0.715903
18.5722						0.713842
18.6722						0.712599
18.7722						0.71142
18.8722						0.714949
18.9722						0.711637
19.0722						0.713207
19.1722						0.713736
19.2722						0.715603
19.3722						0.712154
19.4722						0.715189
19.5722						0.713793
19.6722						0.711386
19.7722						0.710029
19.8722						0.710249
19.9722						0.70977
20.0722						0.709295
20.1722						0.712052
20.2722						0.708964
20.3722						0.704622
20.4722						0.709987
20.5722						0.714907
20.6722						0.713531
20.7722						0.710097
20.8722						0.710086
20.9722						0.709888
21.0722						0.709763
21.1722						0.709013
21.2722						0.709496
21.3722						0.712831
21.4722						0.707413
21.5722						0.714683
21.6722						0.709439
21.7722						0.711603
21.8722						0.709607
21.9722						0.708055
22.0722						0.704333
22.1722						0.708721
22.2722						0.708759
22.3722						0.701409
22.4722						0.705105
22.5722						0.708717
22.6722						0.702538
22.7722						0.706356
22.8722						0.707048
22.9722						0.698371
23.0722						0.704523
23.1722						0.709417
23.2722						0.705105
23.3722						0.706888
23.4722						0.705789
23.5722						0.707485
23.6722						0.700694
23.7722						0.702511
23.8722						0.706762
23.9722						0.704276
24.0722						0.707021
24.1722						0.699447
24.2722						0.703781
24.3722						0.699865
24.4722						0.698492
24.5722						0.700755
24.6722						0.700671
24.7722						0.696641
24.8722						0.697078
24.9722						0.701413
25.0722						0.699762
25.1722						0.69504
25.2722						0.697447
25.3722						0.694378
25.4722						0.699884
25.5722						0.69377
25.6722						0.697424
25.7722						0.694469
25.8722						0.699675
25.9722						0.693834
26.0722						0.699812
26.1722						0.693834
26.2722						0.696458
26.3722						0.689694
26.4722						0.697279
26.5722						0.691827
26.6722						0.695713
26.7722						0.694036
26.8722						0.689127
26.9722						0.696462
27.0722						0.693135
27.1722						0.690926
27.2722						0.692872
27.3722						0.691378
27.4722						0.688633
27.5722						0.686199
27.6722						0.687062
27.7722						0.692047
27.8722						0.687652
27.9722						0.68904
28.0722						0.688827
28.1722						0.688237
28.2722						0.68296
28.3722						0.686108
28.4722						0.682085
28.5722						0.687899
28.6722						0.6851
28.7722						0.683161
28.8722						0.683446
28.9722						0.693146
29.0722						0.682507
29.1722						0.679876
29.2722						0.685496
29.3722						0.682313
29.4722						0.68123
29.5722						0.680758
29.6722						0.680735
29.7722						0.67918
29.8722						0.680473
29.9722						0.68318
30.0722						0.681367
0.143333							0.02581
0.243333							0.054012
0.343333							0.090237
0.443333							0.138638
0.543333							0.189996
0.643333							0.247849
0.743333							0.307124
0.843333							0.363718
0.943333							0.413974
1.04333							0.460929
1.14333							0.509143
1.24333							0.555041
1.34333							0.590699
1.44333							0.625358
1.54333							0.657024
1.64333							0.692279
1.74333							0.718303
1.84333							0.746942
1.94333							0.774148
2.04333							0.79462
2.14333							0.814
2.24333							0.838871
2.34333							0.857294
2.44333							0.870336
2.54333							0.894393
2.64333							0.908823
2.74333							0.928489
2.84333							0.946626
2.94333							0.960341
3.04333							0.975289
3.14333							0.992004
3.24333							1.01008
3.34333							1.02278
3.44333							1.0338
3.54333							1.04735
3.64333							1.06199
3.74333							1.06961
3.84333							1.07744
3.94333							1.09582
4.04333							1.09844
4.14333							1.10922
4.24333							1.12454
4.34333							1.1355
4.44333							1.14412
4.54333							1.14852
4.64333							1.1597
4.74333							1.16841
4.84333							1.17508
4.94333							1.19068
5.04333							1.18716
5.14333							1.19983
5.24333							1.20483
5.34333							1.21294
5.44333							1.21493
5.54333							1.22672
5.64333							1.22642
5.74333							1.23712
5.84333							1.24237
5.94333							1.2483
6.04333							1.257
6.14333							1.25257
6.24333							1.2592
6.34333							1.27056
6.44333							1.26952
6.54333							1.27544
6.64333							1.28186
6.74333							1.28263
6.84333							1.29212
6.94333							1.28901
7.04333							1.29851
7.14333							1.29801
7.24333							1.30106
7.34333							1.30696
7.44333							1.30772
7.54333							1.31366
7.64333							1.31251
7.74333							1.32438
7.84333							1.31646
7.94333							1.31697
8.04333							1.33205
8.14333							1.33425
8.24333							1.32695
8.34333							1.33256
8.44333							1.32923
8.54333							1.33337
8.64333							1.33404
8.74333							1.33537
8.84333							1.33871
8.94333							1.33943
9.04333							1.34379
9.14333							1.35015
9.24333							1.33907
9.34333							1.34901
9.44333							1.35125
9.54333							1.34628
9.64333							1.35595
9.74333							1.35413
9.84333							1.3517
9.94333							1.3567
10.0433							1.34728
10.1433							1.35404
10.2433							1.36041
10.3433							1.3591
10.4433							1.36011
10.5433							1.3606
10.6433							1.36209
10.7433							1.35882
10.8433							1.36065
10.9433							1.36307
11.0433							1.36289
11.1433							1.35789
11.2433							1.36131
11.3433							1.35879
11.4433							1.35633
11.5433							1.36181
11.6433							1.36196
11.7433							1.35975
11.8433							1.36993
11.9433							1.35736
12.0433							1.36439
12.1433							1.36434
12.2433							1.36167
12.3433							1.35947
12.4433							1.36214
12.5433							1.36563
12.6433							1.35792
12.7433							1.36374
12.8433							1.35874
12.9433							1.36678
13.0433							1.35929
13.1433							1.35891
13.2433							1.36189
13.3433							1.36271
13.4433							1.3563
13.5433							1.36389
13.6433							1.35456
13.7433							1.3593
13.8433							1.35838
13.9433							1.36008
14.0433							1.36042
14.1433							1.35633
14.2433							1.35384
14.3433							1.35579
14.4433							1.35197
14.5433							1.36042
14.6433							1.356
14.7433							1.35549
14.8433							1.34923
14.9433							1.35303
15.0433							1.35221
15.1433							1.35269
15.2433							1.34683
15.3433							1.35367
15.4433							1.35187
15.5433							1.34717
15.6433							1.34617
15.7433							1.34985
15.8433							1.35033
15.9433							1.34638
16.0433							1.34808
16.1433							1.34509
16.2433							1.34376
16.3433							1.34699
16.4433							1.34186
16.5433							1.3447
16.6433							1.33705
16.7433							1.3403
16.8433							1.34252
16.9433							1.33409
17.0433							1.33924
17.1433							1.33679
17.2433							1.33623
17.3433							1.33678
17.4433							1.33065
17.5433							1.33242
17.6433							1.32795
17.7433							1.33126
17.8433							1.33177
17.9433							1.33071
18.0433							1.32962
18.1433							1.32787
18.2433							1.32957
18.3433							1.32792
18.4433							1.32363
18.5433							1.32401
18.6433							1.32441
18.7433							1.31965
18.8433							1.32419
18.9433							1.32095
19.0433							1.31693
19.1433							1.31772
19.2433							1.31487
19.3433							1.31206
19.4433							1.31287
19.5433							1.31566
19.6433							1.31495
19.7433							1.30536
19.8433							1.31693
19.9433							1.31015
[truncated: 2,801 more rows]
