# Supplementary material for: Towards a molecular mechanism underlying mitochondrial protein import through the TOM and TIM23 complexes
Source: eLife. 2022 Jun 8;11:e75426. doi: 10.7554/eLife.75426 (PMC9255969; doi:10.7554/eLife.75426)
Supplement: Figure 6—figure supplement 2—source data 1. [file elife-75426-fig6-figsupp2-data1.xlsx]

## Sheet: Panel A
PCP-DHFR (nM)	0	1	3	10	32	100	316	1000
time (min)
0	1.02911	1.03996	1.04178	1.02468	1.04171	1.02353	1.03076	1.04392
0.083334	1.02946	1.02773	1.04042	1.05116	1.02256	1.01025	1.0234	1.04134
0.166667	1.01582	1.01165	1.03431	1.02536	1.00744	1.01349	1.02641	1.03327
0.25	1.02176	1.02179	1.03804	1.03181	1.036	1.02321	1.01705	1.0365
0.333334	1.01407	1.02773	1.01834	1.01484	1.02794	1.01803	1.01604	1.01327
0.416667	1.00917	1.02353	1.03125	1.01552	1.01349	1.00346	1.003	1.02392
0.5	1.01442	1.00921	1.02412	1.0145	1.03029	1.00767	1.01537	1.02295
0.583334	1.01791	1.00991	1.02038	1.01484	1.01785	1.01155	1.01404	1.02392
0.666667	1.02036	1.00851	1.02378	1.01416	1.02861	1.02127	1.01136	1.02231
0.75	1.01267	1.01585	1.02004	1.02299	1.03029	1.00054	1.01136	1.0094
0.833334	1.01547	1.0127	1.02921	1.01212	1.01785	1.00669	1.01604	1.02069
0.916667	1.00007	1.01025	1.01902	1.00737	1.01718	1.00702	1.02608	1.01069
1	0.996577	1.00536	0.998981	1.00126	1.01046	1.02418	1.00133	1.01456
1.08333	1.01721	1.00536	1.01902	1.01009	1.01752	1.01997	1.00701	1.01069
1.16667	0.992029	1.01899	1.00849	0.984632	1.00845	1.01317	0.991628	1.00843
1.25	1.00847	1.00886	1.01155	0.988026	1.01181	1.01058	0.99631	1.00456
1.33333	0.998675	1.00117	0.998302	0.986668	1.00609	0.99957	1.00701	0.993596
1.41667	1.01302	1.00536	1.00951	1.00635	1.01718	1.03098	1.01136	1.00908
1.5	0.99133	0.999072	0.992867	1.0016	1.01315	0.993418	1.00735	1.00972
1.58333	1.00462	1.00851	1.00068	1.00364	1.00206	1.00734	1.01136	0.998112
1.66667	0.997626	1.01445	0.992867	0.996511	1.01416	1.00184	1.00333	1.00682
1.75	0.987482	0.99418	1.00306	1.005	1.00038	0.996008	0.997982	0.995854
1.83333	0.999025	0.982298	0.998302	1.00669	1.00643	1.00507	1.00133	0.991983
1.91667	0.994128	1.00641	0.986753	1.00025	1.00307	0.995684	0.993635	1.00134
2	0.994128	0.995577	0.996603	1.00126	0.997692	0.990827	0.991628	1.01102
2.08333	0.995527	1.00222	0.998641	1.00941	1.00004	1.00928	1.00701	0.989725
2.16667	0.994478	1.01095	0.985394	1.01077	0.989963	0.99698	0.986611	0.996822
2.25	0.99133	1.00327	0.986413	0.991081	0.991307	1.00767	1.01236	0.993596
2.33333	1.01826	0.986841	1.00034	0.991081	1.00475	1.00993	0.994972	0.994241
2.41667	0.988881	1.00886	0.994226	0.997869	0.985931	0.997627	0.985273	1.00682
2.5	0.993079	1.00187	0.980978	0.994814	0.999036	0.992446	0.999989	0.995531
2.58333	0.996227	0.991384	0.98913	1.00873	0.986939	1.00475	1.0117	0.998112
2.66667	1.00112	0.997325	0.992867	1.00534	1.00509	0.990827	1.00266	0.998435
2.75	0.989581	0.990685	0.996603	1.00126	0.982906	0.992446	0.997648	1.00682
2.83333	0.988181	0.991384	0.975543	0.970716	0.99534	1.00216	0.999655	1.00392
2.91667	1.00147	0.994879	0.986073	1.00092	0.979546	0.986618	0.988618	0.991015
3	1.00182	1.00082	0.993546	0.991081	0.984922	0.992446	0.992631	0.999402
3.08333	1.00077	0.989986	0.995584	0.992099	0.979546	0.99277	0.986277	0.993596
3.16667	1.01582	0.988938	0.998981	1.00025	0.988283	1.00119	0.990959	0.982305
3.25	1.00532	0.989637	0.984375	0.995832	1.00912	0.986942	0.982263	0.99295
3.33333	0.997626	1.00816	0.998302	0.992438	0.995676	0.99698	0.980257	0.985531
3.41667	0.991679	0.980202	0.987772	1.00364	0.982234	0.991475	0.990959	0.987789
3.5	0.992029	0.990685	1.00883	0.995154	0.977866	0.985647	0.992297	0.983273
3.58333	0.987132	0.993481	0.980978	1.00771	1.00072	0.983056	0.985273	0.994886
3.66667	0.985033	0.996975	0.983356	1.00568	1.00609	0.99698	0.998986	0.989402
3.75	0.994478	0.990685	0.992867	0.995493	0.978538	0.981113	0.982263	0.982305
3.83333	0.99028	0.992782	0.988451	0.975128	0.988955	0.99018	0.998986	0.988757
3.91667	0.994478	0.990336	0.99966	1.00262	0.993323	0.991151	0.986946	0.978434
4	0.992029	0.973912	1.00034	1.00092	0.980554	0.996008	0.989621	0.991015
4.08333	0.981185	0.985443	0.987432	0.999227	0.993323	0.98597	0.989621	0.99166
4.16667	0.994128	0.993131	0.965353	0.993796	0.982234	0.988237	0.987615	0.983918
4.25	1.00987	0.980202	0.991508	0.988026	0.97921	0.980466	0.991962	0.985853
4.33333	0.987482	0.991035	0.97962	0.976825	0.984586	0.99018	0.995641	0.987789
4.41667	0.987832	0.996975	0.986413	0.977844	0.964088	0.988237	0.982932	0.991338
4.5	0.994128	0.975309	1.00442	0.982256	0.98425	0.991799	0.997313	0.97553
4.58333	0.989231	0.987191	0.991168	0.986668	0.98425	0.99277	0.9933	0.985531
4.66667	1.00777	0.996975	0.994226	0.985311	1.00542	0.990827	0.984605	0.977143
4.75	0.983984	0.990336	0.990829	0.980898	0.982906	0.996656	0.998651	0.983273
4.83333	0.980136	0.990336	0.972147	0.981577	0.987275	0.99018	1.00233	0.986499
4.91667	0.996227	0.98754	0.991168	0.989384	0.989963	0.994713	1.00133	0.980047
5	0.986782	0.994879	0.988791	0.976825	0.976185	0.997951	0.998317	0.988757
6.8	0.995177	0.989287	1.04857	1.01586	1.04003	0.993094	1.04514	1.02263
6.88333	0.976638	0.99418	1.02242	1.00534	1.04843	1.00216	1.03945	1.03198
6.96667	0.972091	0.993481	1.02989	1.00194	1.05314	0.990827	1.05317	1.06392
7.05	0.972091	0.9816	1.03567	1.00296	1.06759	1.00961	1.04648	1.0494
7.13333	0.988181	0.98125	1.02717	1.00907	1.05045	1.00475	1.0418	1.0665
7.21667	0.998326	0.979153	1.03465	0.998887	1.04877	1.01155	1.0525	1.05876
7.3	0.983984	0.98125	1.02242	1.00262	1.05851	1.00151	1.04547	1.07586
7.38333	0.981535	0.992432	1.01461	1.00025	1.05079	1.00702	1.07725	1.07392
7.46667	0.983284	0.978804	1.02004	1.00839	1.06322	1.01349	1.06755	1.08715
7.55	0.984334	0.983696	1.02785	0.997869	1.04373	1.01965	1.07156	1.09295
7.63333	0.979087	0.988239	1.01291	1.01178	1.05751	1.01608	1.07056	1.09328
7.71667	0.992029	0.98789	1.03804	1.01518	1.06725	1.02321	1.08159	1.0907
7.8	0.99098	0.986142	1.03329	1.01009	1.06456	1.03001	1.08059	1.09425
7.88333	0.985733	0.99418	1.02819	1.01144	1.07565	1.03001	1.07022	1.08554
7.96667	0.988181	0.99383	1.02276	1.01518	1.07498	1.0313	1.09397	1.08844
8.05	0.985383	0.999421	1.02649	1.00364	1.06456	1.019	1.10266	1.09102
8.13333	0.986432	1.01794	1.03702	1.00941	1.08271	1.01544	1.0933	1.09973
8.21667	0.983984	1.0113	1.02649	1.0274	1.08103	1.03292	1.08929	1.10457
8.3	0.986782	0.980901	1.01698	1.01178	1.07834	1.04231	1.10902	1.10134
8.38333	0.978737	1.00082	1.03431	1.02434	1.07464	1.04976	1.11437	1.09973
8.46667	0.988881	1.00641	1.02921	1.02265	1.06187	1.04555	1.09932	1.11005
8.55	0.985033	1.00082	1.03397	1.00975	1.08472	1.02871	1.10768	1.10747
8.63333	0.989581	0.99418	1.02717	1.02536	1.07868	1.04102	1.1147	1.1136
8.71667	0.981185	0.995577	1.02276	1.02366	1.06255	1.03713	1.08059	1.11005
8.8	0.994128	1.00082	1.02208	1.01925	1.07632	1.03389	1.10066	1.1178
8.88333	1.00567	0.998373	1.02038	1.03045	1.08641	1.04102	1.10233	1.11812
8.96667	0.984683	0.999421	1.02819	1.01552	1.08708	1.04587	1.11169	1.12328
9.05	0.993778	0.998723	1.0428	1.02366	1.08809	1.0449	1.12607	1.1178
9.13334	1.00847	1.0106	1.0377	1.02536	1.09817	1.06044	1.10166	1.12909
9.21667	0.994128	0.992782	1.03499	1.02842	1.08472	1.053	1.10701	1.1207
9.3	0.988881	1.00257	1.03363	1.03317	1.08943	1.06368	1.11404	1.13457
9.38334	1.00147	1.00152	1.02514	1.03113	1.09918	1.04296	1.12072	1.14425
9.46667	0.986782	1.01724	1.0411	1.0257	1.06994	1.05688	1.11705	1.14296
9.55	0.996577	0.999771	1.03363	1.0352	1.07868	1.05688	1.08761	1.13651
9.63334	0.983984	1.0106	1.03261	1.03452	1.07969	1.05591	1.10467	1.13812
9.71667	0.997976	1.00152	1.02072	1.02366	1.08405	1.05559	1.1234	1.13586
9.8	0.987832	1.0141	1.0411	1.04131	1.10321	1.05267	1.11972	1.13715
9.88334	0.979786	0.997674	1.02785	1.05319	1.1022	1.05818	1.12106	1.12392
9.96667	0.988881	0.994879	1.02785	1.04674	1.08204	1.07016	1.12641	1.1407
10.05	0.968243	0.997325	1.05197	1.0481	1.07733	1.06401	1.12106	1.12747
10.1333	0.978387	0.993481	1.04959	1.03486	1.10858	1.06854	1.13009	1.14102
10.2167	0.974189	0.994529	1.04076	1.0498	1.09884	1.06886	1.11939	1.12715
10.3	0.998326	1.00327	1.04212	1.05523	1.1022	1.06239	1.12373	1.14102
10.3833	0.98993	1.00152	1.0377	1.0498	1.09413	1.0666	1.12607	1.14876
10.4667	0.988531	1.00117	1.0411	1.0386	1.09447	1.07728	1.12541	1.12747
10.55	0.979786	0.995577	1.04144	1.05489	1.08943	1.07275	1.12908	1.12457
10.6333	0.983284	1.0106	1.03702	1.04573	1.10186	1.07242	1.1341	1.1307
10.7167	1.00077	1.01759	1.05367	1.05998	1.10623	1.06239	1.13276	1.14005
10.8	0.982235	1.00327	1.04314	1.04641	1.09548	1.06951	1.12875	1.13683
10.8833	0.995177	1.00676	1.04653	1.0593	1.10791	1.07113	1.12072	1.13264
10.9667	0.996227	1.0155	1.04484	1.04844	1.09615	1.06919	1.1321	1.13489
11.05	0.992729	1.00536	1.04008	1.0593	1.11262	1.06854	1.12775	1.14554
11.1333	0.999725	1.00606	1.04891	1.06304	1.10186	1.07923	1.13577	1.12844
11.2167	0.99098	1.00851	1.04993	1.03928	1.1069	1.08214	1.1331	1.11683
11.3	0.999725	1.01305	1.06216	1.04437	1.09615	1.09282	1.13176	1.13167
11.3833	1.01232	1.0148	1.04178	1.04641	1.10724	1.0789	1.11939	1.13038
11.4667	0.996577	1.00606	1.06794	1.0593	1.11564	1.05785	1.13009	1.11941
11.55	0.994128	1.01375	1.0411	1.05998	1.09447	1.07696	1.14648	1.12973
11.6333	0.996926	1.02318	1.05571	1.06847	1.11766	1.07728	1.13511	1.14554
11.7167	0.997276	1.00571	1.06182	1.05727	1.11698	1.0721	1.12908	1.12876
11.8	0.995177	0.995927	1.06148	1.06168	1.11262	1.07275	1.12875	1.12618
11.8833	1.00007	1.00222	1.05231	1.06609	1.1059	1.06239	1.13577	1.12328
11.9667	0.998675	0.99383	1.04857	1.05387	1.10892	1.08667	1.14179	1.14651
12.05	1.00252	1.01305	1.0642	1.05489	1.10758	1.0721	1.1244	1.14586
12.1333	1.00532	1.01654	1.05095	1.06304	1.10724	1.09153	1.12674	1.13844
12.2167	0.997626	1.01724	1.0608	1.05421	1.0938	1.07469	1.1234	1.12747
12.3	1.00042	1.00886	1.06182	1.0739	1.11194	1.08149	1.14748	1.13586
12.3833	0.992729	1.00361	1.0676	1.0722	1.10388	1.08279	1.12942	1.13747
12.4667	0.996926	1.00501	1.0625	1.06304	1.11094	1.09347	1.14347	1.13264
12.55	0.992379	1.00851	1.06148	1.05625	1.11698	1.09639	1.12674	1.13909
12.6333	0.993428	0.992432	1.06148	1.06745	1.09145	1.09768	1.13678	1.14909
12.7167	0.996577	1.01375	1.06216	1.05998	1.10825	1.09412	1.1428	1.14038
12.8	1.00357	1.00606	1.06861	1.06745	1.1069	1.09768	1.13878	1.12909
12.8833	1.00777	1.01375	1.06624	1.06982	1.10421	1.09736	1.15517	1.14167
12.9667	1.01686	1.01305	1.06726	1.06066	1.11094	1.09671	1.14681	1.12941
13.05	1.00602	1.02179	1.05774	1.05014	1.10858	1.07955	1.13778	1.15038
13.1333	0.995877	1.00257	1.06895	1.05557	1.11228	1.09444	1.13143	1.12005
13.2167	0.989231	0.999771	1.06794	1.06507	1.10926	1.0993	1.1147	1.15586
13.3	1.00672	1.012	1.07235	1.07084	1.11766	1.09347	1.12875	1.13457
13.3833	1.00567	1.0148	1.06148	1.07016	1.10993	1.08797	1.14146	1.14683
13.4667	0.98993	1.00117	1.07065	1.0739	1.11497	1.0912	1.13845	1.14844
13.55	1.00217	1.02144	1.06726	1.0576	1.12673	1.1006	1.13711	1.13554
13.6333	0.986083	1.0113	1.06895	1.07865	1.11396	1.09542	1.14882	1.13328
13.7167	1.01512	1.0141	1.0659	1.06473	1.12034	1.09218	1.13979	1.1578
13.8	0.995527	1.00466	1.05944	1.07084	1.0975	1.08894	1.14882	1.15425
13.8833	1.01652	1.00571	1.06284	1.05998	1.12606	1.08894	1.15417	1.15296
13.9667	0.994478	1.00746	1.06012	1.07797	1.12001	1.08894	1.14179	1.14683
14.05	1.01547	1.02318	1.0788	1.07933	1.12875	1.08343	1.13042	1.14522
14.1333	0.994828	1.0155	1.06556	1.0593	1.09783	1.09542	1.13711	1.14683
14.2167	1.01652	1.00886	1.07609	1.07661	1.10556	1.08764	1.12574	1.14973
14.3	1.00042	1.01654	1.0642	1.07899	1.11127	1.0938	1.13343	1.13747
14.3833	1.00602	1.01654	1.07609	1.06711	1.12034	1.09962	1.1321	1.14651
14.4667	0.992379	1.0134	1.07269	1.06745	1.12135	1.10481	1.1234	1.13393
14.55	0.998675	1.03576	1.07235	1.07526	1.11967	1.08149	1.13778	1.15038
14.6333	0.999375	1.01864	1.07133	1.06473	1.12337	1.08052	1.13343	1.13747
14.7167	0.997976	1.01689	1.07269	1.07831	1.10892	1.09153	1.13243	1.1636
14.8	1.00357	1.012	1.07541	1.07254	1.11598	1.09023	1.12975	1.14102
14.8833	1.00427	1.01724	1.07575	1.05862	1.12236	1.08862	1.13778	1.14199
14.9667	1.02491	1.03017	1.07235	1.08374	1.12707	1.09282	1.14146	1.14005
15.05	1.00217	1.01654	1.07575	1.06881	1.14017	1.08538	1.14748	1.13425
15.1333	1.01582	1.00781	1.07201	1.06439	1.1227	1.09412	1.13945	1.1378
15.2167	1.00427	1.00082	1.07133	1.07797	1.1395	1.098	1.13611	1.12909
15.3	1.00742	1.00641	1.07914	1.05964	1.12471	1.08667	1.13611	1.13651
15.3833	1.01407	1.00501	1.08356	1.06847	1.13849	1.09185	1.13243	1.14618
15.4667	1.01686	1.0155	1.09239	1.07186	1.12673	1.07275	1.14112	1.13909
15.55	1.03051	1.01235	1.07507	1.07661	1.1311	1.08862	1.13276	1.14457
15.6333	1.01931	1.01445	1.05944	1.07322	1.13177	1.09574	1.1535	1.1436
15.7167	1.00532	1.00117	1.07643	1.07152	1.12673	1.0857	1.15116	1.13941
15.8	1.02561	1.012	1.05673	1.08781	1.12572	1.0857	1.14681	1.14973
15.8833	1.02526	1.00536	1.07745	1.06881	1.12707	1.08732	1.14112	1.12941
15.9667	1.02771	1.01794	1.08356	1.0739	1.12034	1.09606	1.12875	1.13425
16.05	1.03191	1.02074	1.06794	1.06847	1.12572	1.10869	1.13176	1.14393
16.1333	1.04065	1.02318	1.05808	1.07356	1.12438	1.09088	1.13042	1.14328
16.2167	1.02456	1.00886	1.07541	1.05387	1.12707	1.0993	1.13644	1.13489
16.3	1.01931	1.01515	1.07507	1.0834	1.13412	1.09088	1.15718	1.15747
16.3833	1.01791	1.0141	1.06861	1.06779	1.1274	1.10448	1.1438	1.13683
16.4667	1.02071	1.01165	1.07982	1.08238	1.12539	1.08797	1.12975	1.14522
16.55	1.02421	1.00921	1.07812	1.07458	1.13311	1.09509	1.14681	1.13038
16.6333	1.01721	1.02668	1.08016	1.08001	1.13278	1.08959	1.14213	1.15199
16.7167	1.02526	1.02877	1.08288	1.07118	1.11833	1.09282	1.14313	1.13038
16.8	1.03331	1.03087	1.09171	1.09426	1.12639	1.10513	1.14614	1.14005
16.8833	1.03226	1.02528	1.07643	1.08883	1.10825	1.10221	1.12607	1.13941
16.9667	1.03505	1.02004	1.07847	1.06745	1.12606	1.09218	1.13577	1.13554
17.05	1.02421	1.01724	1.05469	1.08102	1.12068	1.08797	1.14079	1.13618
17.1333	1.04555	1.02598	1.0839	1.08849	1.12438	1.10157	1.16253	1.15489
17.2167	1.02561	1.03576	1.08526	1.07627	1.13009	1.087	1.13477	1.14457
17.3	1.03366	1.03506	1.06726	1.07627	1.13715	1.09153	1.14982	1.13909
17.3833	1.0368	1.03157	1.07303	1.08578	1.11497	1.0912	1.14413	1.14328
17.4667	1.02211	1.02633	1.07405	1.08442	1.13009	1.08603	1.13176	1.14651
17.55	1.01337	1.03821	1.07507	1.08102	1.11396	1.07663	1.15116	1.14651
17.6333	1.02631	1.01899	1.0805	1.09121	1.12975	1.10383	1.14012	1.14941
17.7167	1.03016	1.03576	1.09239	1.09121	1.1442	1.09898	1.1545	1.14522
17.8	1.02631	1.02738	1.08424	1.08747	1.12169	1.09995	1.13477	1.14876
17.8833	1.02596	1.0438	1.08084	1.07729	1.14084	1.10513	1.14347	1.1507
17.9667	1.02701	1.02563	1.07575	1.08136	1.12471	1.10221	1.14213	1.13909
18.05	1.02701	1.04205	1.07643	1.08306	1.13211	1.0912	1.12875	1.14651
18.1333	1.03226	1.02528	1.08152	1.08035	1.1237	1.12067	1.14179	1.14844
18.2167	1.02771	1.02738	1.08662	1.07458	1.14588	1.10869	1.14012	1.15747
18.3	1.02946	1.0148	1.06624	1.07729	1.12068	1.09736	1.13811	1.15264
18.3833	1.0403	1.03402	1.07948	1.06915	1.14084	1.1061	1.14882	1.13264
18.4667	1.02421	1.03751	1.07711	1.07831	1.12875	1.11614	1.13878	1.14489
18.55	1.03505	1.0473	1.07914	1.0851	1.12908	1.09833	1.13176	1.14199
18.6333	1.02141	1.03227	1.08594	1.07967	1.12068	1.0993	1.13912	1.14522
18.7167	1.03505	1.03646	1.07235	1.06473	1.12942	1.10286	1.14179	1.14264
18.8	1.02981	1.02877	1.08764	1.08476	1.13311	1.11063	1.12975	1.14812
18.8833	1.02841	1.03611	1.08356	1.08951	1.13513	1.09347	1.12674	1.14909
18.9667	1.02666	1.03786	1.07405	1.08238	1.12942	1.10254	1.15049	1.14909
19.05	1.03435	1.01899	1.08118	1.07559	1.1274	1.09056	1.14748	1.13618
19.1333	1.0417	1.02947	1.07133	1.09596	1.12673	1.10254	1.1321	1.13586
19.2167	1.03925	1.03786	1.09375	1.07899	1.13177	1.08473	1.15383	1.16393
19.3	1.02386	1.04101	1.0839	1.07695	1.12774	1.11646	1.14815	1.13618
19.3833	1.02806	1.03506	1.08016	1.07831	1.12236	1.10319	1.15183	1.14618
19.4667	1.03051	1.04136	1.08628	1.07492	1.12707	1.1142	1.13644	1.13586
19.55	1.01826	1.03332	1.08492	1.07729	1.13009	1.10513	1.13577	1.13586
19.6333	1.03261	1.04136	1.06827	1.07933	1.12572	1.10027	1.15651	1.13651
19.7167	1.04135	1.03017	1.07303	1.08476	1.12337	1.11387	1.15751	1.13715
19.8	1.03156	1.03262	1.08865	1.09426	1.12001	1.09444	1.15417	1.14231
19.8833	1.02246	1.03157	1.09647	1.07118	1.13446	1.0938	1.13711	1.13489
19.9667	1.0382	1.02249	1.09137	1.09528	1.13547	1.10319	1.13444	1.13554
20.05	1.03401	1.04031	1.09001	1.06847	1.12807	1.10254	1.1428	1.13328
20.1333	1.03435	1.02423	1.07031	1.08374	1.12606	1.10966	1.13811	1.13651
20.2167	1.02841	1.03017	1.07982	1.09969	1.13076	1.12164	1.15116	1.15038
20.3	1.03191	1.04171	1.08831	1.0851	1.12505	1.08926	1.13544	1.13876
20.3833	1.02351	1.03472	1.08152	1.07763	1.13816	1.10642	1.13109	1.13909
20.4667	1.03995	1.03856	1.08322	1.08272	1.12034	1.09477	1.15818	1.15038
20.55	1.02701	1.0445	1.07609	1.08204	1.12203	1.10707	1.11872	1.14296
20.6333	1.02631	1.04066	1.08254	1.07424	1.14286	1.10124	1.13176	1.13522
20.7167	1.03785	1.03157	1.07439	1.10139	1.14152	1.10545	1.1331	1.15264
20.8	1.02876	1.03786	1.08118	1.08204	1.13311	1.10286	1.13444	1.14554
20.8833	1.0347	1.02633	1.09205	1.07933	1.13311	1.10189	1.14514	1.1436
20.9667	1.03016	1.03506	1.08254	1.09562	1.12707	1.10157	1.13711	1.14135
21.05	1.03366	1.01654	1.06997	1.08713	1.12975	1.10739	1.14246	1.1478
21.1333	1.02666	1.03297	1.07609	1.08374	1.14723	1.09865	1.14715	1.1278
21.2167	1.03785	1.03611	1.07065	1.06507	1.13177	1.10254	1.13176	1.13876
21.3	1.0382	1.03227	1.07541	1.07695	1.12975	1.10999	1.15016	1.16167
21.3833	1.02106	1.03157	1.08899	1.08985	1.12203	1.12326	1.1535	1.1507
21.4667	1.0354	1.03297	1.08152	1.08612	1.13244	1.11646	1.13511	1.13554
21.55	1.03715	1.03926	1.09477	1.07526	1.12303	1.10545	1.13745	1.14941
21.6333	1.03016	1.03681	1.07439	1.06779	1.12606	1.10966	1.13678	1.1307
21.7167	1.02911	1.0438	1.07031	1.07152	1.13446	1.10545	1.13912	1.14264
21.8	1.02631	1.0445	1.08764	1.08238	1.11698	1.10545	1.1448	1.1436
21.8833	1.0396	1.0431	1.07778	1.07831	1.12807	1.11549	1.12908	1.15199
21.9667	1.02666	1.0473	1.0805	1.08849	1.13748	1.11387	1.14982	1.13554
22.05	1.03296	1.04031	1.07948	1.0929	1.13211	1.10642	1.13343	1.13005
22.1333	1.03995	1.04066	1.06895	1.08612	1.12236	1.09736	1.15584	1.13199
22.2167	1.03855	1.03926	1.07982	1.09155	1.1311	1.09218	1.13745	1.14457
22.3	1.03016	1.03437	1.08118	1.08645	1.13681	1.09606	1.13444	1.14941
22.3833	1.02876	1.0452	1.08118	1.07729	1.14252	1.09898	1.1535	1.12941
22.4667	1.02386	1.04171	1.07405	1.07526	1.14185	1.10545	1.14246	1.13812
22.55	1.02771	1.03751	1.09307	1.08883	1.12639	1.10869	1.15216	1.15102
22.6333	1.05359	1.02703	1.07201	1.08035	1.13043	1.08603	1.13511	1.1536
22.7167	1.02771	1.03227	1.07677	1.08883	1.14051	1.098	1.14213	1.14876
22.8	1.03785	1.03437	1.09171	1.08068	1.13614	1.09315	1.14347	1.14715
22.8833	1.02351	1.03227	1.0839	1.1058	1.12875	1.10513	1.15584	1.15231
22.9667	1.03051	1.02423	1.0822	1.08747	1.13009	1.10189	1.15116	1.15651
23.05	1.0438	1.03576	1.07269	1.09053	1.13715	1.10481	1.13644	1.14425
23.1333	1.02526	1.03996	1.06692	1.08679	1.13009	1.087	1.14213	1.1478
23.2167	1.0396	1.0431	1.09205	1.10207	1.13849	1.09865	1.12808	1.15425
23.3	1.03366	1.04695	1.07847	1.08781	1.12102	1.09218	1.13343	1.13522
23.3833	1.03296	1.04939	1.08865	1.07695	1.12942	1.10578	1.14313	1.13876
23.4667	1.03016	1.03961	1.06556	1.0946	1.12572	1.10286	1.13377	1.13747
23.55	1.03121	1.03402	1.06624	1.07797	1.14017	1.11711	1.14179	1.13167
23.6333	1.02946	1.0438	1.09069	1.09257	1.14588	1.09023	1.13544	1.14876
23.7167	1.02071	1.03332	1.07914	1.09019	1.12673	1.10092	1.14112	1.14747
23.8	1.0459	1.03262	1.08356	1.08747	1.1395	1.1142	1.15082	1.1507
23.8833	1.03366	1.02353	1.07711	1.07627	1.13143	1.10189	1.14547	1.14005
23.9667	1.03995	1.04555	1.09409	1.08374	1.1395	1.10092	1.14547	1.15393
24.05	1.02106	1.02039	1.08492	1.08985	1.12102	1.0925	1.13811	1.14038
24.1333	1.0389	1.0452	1.09171	1.0946	1.14185	1.11549	1.15584	1.13522
24.2167	1.02876	1.03996	1.08662	1.08544	1.13345	1.09218	1.14079	1.1478
24.3	1.02631	1.03506	1.08254	1.08917	1.1442	1.09509	1.14581	1.14586
24.3833	1.02666	1.048	1.08764	1.0851	1.14924	1.11031	1.15049	1.14522
24.4667	1.04275	1.02563	1.09681	1.06982	1.11799	1.09703	1.1331	1.16038
24.55	1.03645	1.05289	1.08967	1.08374	1.12203	1.09574	1.15551	1.13489
24.6333	1.041	1.02633	1.08084	1.09528	1.11799	1.0938	1.15049	1.14167
24.7167	1.02351	1.04939	1.08628	1.08781	1.14084	1.09639	1.13611	1.14005
24.8	1.03505	1.04345	1.08356	1.06915	1.12001	1.11938	1.13811	1.14941
24.8833	1.04065	1.03402	1.09749	1.08951	1.12707	1.10383	1.14681	1.15457
24.9667	1.03121	1.03961	1.07405	1.08645	1.13816	1.09606	1.13778	1.13876
25.05	1.03995	1.04066	1.08696	1.10343	1.12102	1.10189	1.14112	1.14167
25.1333	1.05359	1.03751	1.0839	1.08781	1.13614	1.10319	1.14614	1.14747
25.2167	1.02491	1.03367	1.09681	1.07288	1.13009	1.11484	1.13644	1.14651
25.3	1.02526	1.04171	1.08254	1.08306	1.13244	1.09574	1.1525	1.13393
25.3833	1.0424	1.0459	1.08084	1.09087	1.1358	1.10383	1.14447	1.1378
25.4667	1.0452	1.0452	1.08322	1.07288	1.13379	1.08829	1.15383	1.13812
25.55	1.0389	1.04101	1.09715	1.08815	1.12068	1.10221	1.1545	1.15135
25.6333	1.03121	1.03926	1.09307	1.09867	1.12942	1.10804	1.14547	1.15457
25.7167	1.0361	1.03646	1.07948	1.08136	1.12539	1.10513	1.14949	1.13715
25.8	1.03435	1.03891	1.06997	1.08476	1.13345	1.09218	1.14447	1.14683
25.8833	1.0354	1.02982	1.07473	1.08068	1.12068	1.09962	1.12607	1.13715
25.9667	1.03366	1.04205	1.09545	1.09223	1.12606	1.08408	1.14514	1.14876
26.05	1.0473	1.04031	1.09205	1.08068	1.12606	1.10675	1.1448	1.14973
26.1333	1.0354	1.02563	1.07371	1.09257	1.12908	1.11063	1.16654	1.14618
26.2167	1.02176	1.04066	1.08084	1.07356	1.13681	1.09444	1.15316	1.15393
26.3	1.02561	1.04555	1.08594	1.07865	1.12203	1.11128	1.13577	1.14876
26.3833	1.0424	1.03786	1.08492	1.08612	1.12975	1.10642	1.15484	1.13328
26.4667	1.03121	1.04904	1.07677	1.0834	1.14118	1.09736	1.13979	1.13522
26.55	1.0417	1.03506	1.09817	1.08374	1.12505	1.10416	1.14748	1.13747
26.6333	1.04065	1.03786	1.07507	1.08951	1.13379	1.09574	1.14413	1.14038
26.7167	1.02771	1.03297	1.07371	1.0851	1.13009	1.08797	1.14179	1.13909
26.8	1.02771	1.0445	1.08118	1.08781	1.13076	1.08862	1.14781	1.14489

## Sheet: Panel B
ADP (µM)	0	10	20	100
time (min)
0
0.08	1.10568	1.09055	1.06822	1.09281
0.13	1.05166	1.05807	1.05675	1.07925
0.18	1.0356	1.06073	1.05137	1.06691
0.23	1.03834	1.05204	1.04335	1.05606
0.28	1.03253	1.04246	1.04102	1.04754
0.33	1.02692	1.03344	1.03666	1.03817
0.38	1.02157	1.03042	1.03239	1.03145
0.43	1.01781	1.0269	1.03009	1.03021
0.48	1.0157	1.02533	1.02821	1.02588
0.53	1.01502	1.01927	1.02441	1.02236
0.58	1.01346	1.02205	1.02183	1.02086
0.63	1.01282	1.01734	1.01865	1.01701
0.68	1.0107	1.01629	1.01848	1.01321
0.73	1.00972	1.01503	1.01727	1.01132
0.78	1.00898	1.015	1.01504	1.01247
0.83	1.00654	1.00959	1.01172	1.01046
0.88	1.00694	1.01167	1.01235	1.01048
0.93	1.00482	1.00807	1.00917	1.00736
0.98	1.00552	1.005	1.01107	1.00509
1.03	1.00407	1.00842	1.00604	1.00294
1.08	1.00399	1.00561	1.00818	1.00344
1.13	1.00465	1.00297	1.00833	1.00212
1.18	1.00416	1.00305	1.00354	1.00051
1.23	1.00171	1.00544	1.00179	1.00251
1.28	1.00186	0.996756	1.0004	0.997633
1.33	0.999564	1.00022	0.999202	0.997812
1.38	1.00117	1.00049	1.00155	0.995482
1.43	1.0004	0.998279	1.00009	0.996365
1.48	0.999255	0.996177	0.997397	0.993724
1.53	0.996502	0.997635	0.995722	0.994626
1.58	0.996821	0.995943	0.995472	0.987325
1.63	0.9986	0.996476	0.994435	0.993659
1.68	0.997626	0.993719	0.992102	0.990341
1.73	0.995753	0.991149	0.994546	0.992512
1.78	0.996531	0.990364	0.993667	0.989862
1.83	0.994274	0.993158	0.993463	0.995162
1.88	0.993066	0.992896	0.991871	0.991873
1.93	0.994583	0.988429	0.991991	0.989148
1.98	0.990959	0.992037	0.988807	0.992822
2.03	0.993141	0.989336	0.989621	0.989825
2.08	0.991212	0.986056	0.990241	0.988283
2.13	0.98933	0.987205	0.98902	0.99239
2.18	0.989405	0.989682	0.987936	0.981461
2.23	0.989798	0.987672	0.986715	0.986056
2.28	0.991474	0.986981	0.987437	0.987306
2.33	0.990575	0.988177	0.98789	0.982392
2.38	0.988777	0.984233	0.988622	0.986912
2.43	0.989339	0.987514	0.987872	0.984694
2.48	0.988075	0.986252	0.98627	0.983106
2.53	0.989564	0.987028	0.986974	0.986019
2.58	0.989273	0.985233	0.984502	0.987165
2.63	0.988047	0.986084	0.983021	0.983745
2.68	0.988262	0.986523	0.986298	0.984506
2.73	0.987195	0.983859	0.982632	0.979836
2.78	0.989227	0.982243	0.984113	0.985389
2.83	0.984788	0.981056	0.98179	0.985774
2.88	0.988936	0.980878	0.981308	0.986479
2.93	0.98594	0.979476	0.983456	0.983491
2.98	0.983402	0.984542	0.982012	0.982927
3.03	0.985528	0.981215	0.983771	0.983923
3.08	0.985621	0.982794	0.983465	0.983134
3.13	0.984076	0.984803	0.98042	0.981311
3.18	0.986249	0.982047	0.982753	0.981912
3.23	0.984442	0.982215	0.981068	0.984572
3.28	0.983749	0.98085	0.981086	0.983632
3.33	0.982672	0.98185	0.982512	0.98117
3.38	0.983945	0.984504	0.980346	0.981762
3.43	0.982372	0.980953	0.980549	0.980108
3.48	0.981511	0.982112	0.981743	0.977533
3.53	0.982812	0.978682	0.979151	0.982363
3.58	0.985425	0.979505	0.978753	0.982063
-0.5	1	1	1	1
3.98	0.953409	1.06629	1.06271	1.05945
4.03	0.953035	1.06346	1.06364	1.05923
4.08	0.955151	1.06059	1.05688	1.05533
4.13	0.953568	1.05995	1.05566	1.05283
4.18	0.953877	1.06137	1.05327	1.05409
4.23	0.951752	1.0573	1.05094	1.05232
4.28	0.952107	1.05749	1.0503	1.04959
4.33	0.950703	1.05474	1.04879	1.05034
4.38	0.950328	1.05149	1.04714	1.04935
4.43	0.950993	1.04972	1.04698	1.04725
4.48	0.951124	1.04902	1.04601	1.0457
4.53	0.952379	1.04802	1.04433	1.04506
4.58	0.951059	1.04545	1.03958	1.04248
4.63	0.95339	1.04861	1.04373	1.0409
4.68	0.953213	1.04488	1.04074	1.04337
4.73	0.953522	1.04626	1.0403	1.04157
4.78	0.951714	1.04361	1.04169	1.04339
4.83	0.950347	1.04468	1.03987	1.04063
4.88	0.951199	1.04145	1.03931	1.04308
4.93	0.952707	1.03997	1.04033	1.03969
4.98	0.948306	1.03691	1.03763	1.04136
5.03	0.949635	1.0354	1.03655	1.03994
5.08	0.951283	1.03344	1.03708	1.03627
5.13	0.953269	1.03142	1.03817	1.03584
5.18	0.9506	1.02726	1.04076	1.03319
5.23	0.951405	1.02064	1.03646	1.03721
5.28	0.952641	1.01487	1.03722	1.03497
5.33	0.951939	1.01202	1.0359	1.03416
5.38	0.95546	1.00539	1.03551	1.03469
5.43	0.952838	1.00122	1.03218	1.0324
5.48	0.953559	0.996046	1.03204	1.03446
5.53	0.953194	0.988542	1.03256	1.03355
5.58	0.952107	0.984084	1.03406	1.03184
5.63	0.953606	0.981719	1.03275	1.03292
5.68	0.954552	0.975551	1.03228	1.03244
5.73	0.954243	0.973243	1.03099	1.03355
5.78	0.952192	0.97257	1.02969	1.03019
5.83	0.951489	0.965318	1.02943	1.03444
5.88	0.954608	0.964505	1.02721	1.0315
5.93	0.954327	0.962673	1.03004	1.02928
5.98	0.956256	0.962197	1.0283	1.03011
6.03	0.954121	0.96272	1.02326	1.02845
6.08	0.95222	0.959169	1.02713	1.03097
6.13	0.953756	0.962879	1.02554	1.0281
6.18	0.953578	0.965075	1.02365	1.02887
6.23	0.952669	0.961187	1.02392	1.03009
6.28	0.954205	0.960739	1.02042	1.03096
6.33	0.953269	0.958487	1.02147	1.03149
6.38	0.953503	0.959169	1.01698	1.0305
6.43	0.951602	0.962552	1.01425	1.02979
6.48	0.953006	0.962533	1.013	1.02651
6.53	0.953933	0.96115	1.01155	1.02826
6.58	0.952407	0.963645	1.00731	1.02706
6.63	0.952754	0.961113	1.00231	1.02214
6.68	0.953119	0.962337	1.00017	1.02582
6.73	0.952538	0.962384	0.997879	1.02886
6.78	0.955207	0.960131	0.992759	1.0281
6.83	0.954121	0.961804	0.988196	1.0268
6.88	0.953053	0.961159	0.983697	1.02714
6.93	0.953493	0.960627	0.980716	1.02865
6.98	0.955198	0.961094	0.977717	1.02653
7.03	0.95295	0.959889	0.975661	1.02459
7.08	0.95502	0.96243	0.970644	1.02645
7.13	0.95311	0.960505	0.971746	1.02544
7.18	0.955245	0.960505	0.967265	1.02397
7.23	0.955357	0.960898	0.965562	1.02611
7.28	0.955891	0.961187	0.964044	1.02632
7.33	0.953802	0.957982	0.965905	1.02821
7.38	0.95575	0.959141	0.963322	1.02617
7.43	0.954224	0.95787	0.962803	1.02318
7.48	0.953999	0.96016	0.962072	1.02368
7.53	0.954973	0.959132	0.962442	1.0247
7.58	0.955544	0.958954	0.961378	1.02513
7.63	0.956171	0.960001	0.961239	1.0247
7.68	0.954898	0.960449	0.959962	1.02376
7.73	0.955291	0.960571	0.958101	1.02167
7.78	0.95355	0.959328	0.959369	1.02456
7.83	0.95531	0.959982	0.962692	1.02319
7.88	0.955076	0.959599	0.955555	1.02442
7.93	0.957529	0.963141	0.959887	1.02072
7.98	0.956762	0.959169	0.958712	1.02108
8.03	0.955048	0.959617	0.959776	1.02212
8.08	0.955966	0.959982	0.960369	1.02211
8.13	0.955582	0.959085	0.958952	1.02144
8.18	0.955619	0.961047	0.959425	1.02063
8.23	0.958203	0.958599	0.960258	1.0224
8.28	0.956958	0.960272	0.959425	1.02376
8.33	0.956752	0.961926	0.957693	1.02254
8.38	0.956434	0.960244	0.959101	1.01922
8.43	0.956733	0.962384	0.95761	1.02007
8.48	0.956406	0.962169	0.959128	1.02113
8.53	0.956031	0.963057	0.960693	1.0235
8.58	0.954926	0.96386	0.959378	1.02168
8.63	0.95752	0.95815	0.959841	1.02055
8.68	0.957417	0.962047	0.960322	1.02346
8.73	0.958288	0.963972	0.958693	1.02196
8.78	0.95501	0.961599	0.96122	1.02371
8.83	0.957642	0.964066	0.959036	1.02227
8.88	0.957754	0.964215	0.958499	1.02179
8.93	0.954926	0.96172	0.958832	1.02084
8.98	0.958934	0.963561	0.961368	1.02117
9.03	0.955806	0.963374	0.959462	1.02238
9.08	0.95826	0.96158	0.957444	1.02058
9.13	0.959121	0.963458	0.959665	1.0225
9.18	0.958091	0.965215	0.959767	1.02241
9.23	0.956893	0.959487	0.958767	1.01994
9.28	0.956293	0.960851	0.958258	1.01972
9.33	0.957061	0.961543	0.958934	1.01718
9.38	0.956256	0.963215	0.960702	1.0196
9.43	0.955666	0.961767	0.960267	1.02026
9.48	0.95855	0.966309	0.961045	1.01968
9.53	0.957539	0.962851	0.960313	1.01776
9.58	0.956939	0.958804	0.961868	1.02152
9.63	0.958522	0.967131	0.958332	1.02067
9.68	0.958803	0.96343	0.958804	1.02186
9.73	0.956808	0.962823	0.961045	1.02194
9.78	0.96105	0.966178	0.961878	1.01832
9.83	0.958466	0.962524	0.960304	1.01904
9.88	0.958606	0.962206	0.959221	1.01832
9.93	0.956012	0.964692	0.961091	1.02133
9.98	0.958915	0.962515	0.959526	1.02167
10.03	0.958719	0.960683	0.958591	1.01985
10.08	0.960479	0.963384	0.960008	1.02076
10.13	0.958906	0.963627	0.960804	1.01916
10.18	0.957192	0.964309	0.959406	1.01987
10.23	0.95782	0.966421	0.9601	1.01727
10.28	0.957773	0.966664	0.958147	1.01621
10.33	0.958531	0.96529	0.958332	1.01782
10.38	0.956902	0.965757	0.961295	1.01802
10.43	0.958129	0.965496	0.960619	1.01712
10.48	0.95722	0.965225	0.961295	1.0169
10.53	0.960142	0.966496	0.961156	1.01967
10.58	0.958793	0.963739	0.961443	1.01715
10.63	0.958859	0.968589	0.960498	1.0177
10.68	0.962136	0.968234	0.958767	1.02049
10.73	0.960161	0.965907	0.964627	1.02052
10.78	0.960694	0.966627	0.960489	1.01956
10.83	0.956546	0.965197	0.959832	1.01588
10.88	0.961987	0.965879	0.961878	1.01738
10.93	0.958756	0.965505	0.958915	1.01817
10.98	0.960432	0.964131	0.960471	1.0156
11.03	0.95767	0.966215	0.96098	1.01721
11.08	0.962052	0.96829	0.961387	1.01904
11.13	0.959664	0.964187	0.961804	1.02038
11.18	0.958035	0.962066	0.962729	1.02014
11.23	0.961771	0.963599	0.963507	1.01955
11.28	0.956977	0.962795	0.963924	1.01999
11.33	0.960928	0.966271	0.962007	1.01463
11.38	0.96135	0.964328	0.963812	1.01832
11.43	0.961528	0.964608	0.963998	1.01942
11.48	0.961013	0.965056	0.96147	1.01745
11.53	0.961893	0.964683	0.959286	1.01456
11.58	0.9612	0.965402	0.961498	1.01845
11.63	0.962286	0.961496	0.962933	1.01587
11.68	0.961668	0.963001	0.962452	1.01703
11.73	0.961013	0.965589	0.962868	1.01569
11.78	0.960676	0.96301	0.961683	1.01831
11.83	0.961799	0.965346	0.962813	1.01556
11.88	0.96268	0.968813	0.962535	1.01785
11.93	0.960704	0.965113	0.961591	1.01603
11.98	0.95825	0.963627	0.964349	1.01684
12.03	0.961734	0.964328	0.961943	1.01546
12.08	0.961116	0.965757	0.960628	1.01523
12.13	0.962783	0.964795	0.959267	1.01848
12.18	0.960788	0.965356	0.962692	1.01259
12.23	0.961996	0.965542	0.963526	1.01535
12.28	0.960825	0.965365	0.961396	1.0149
12.33	0.96208	0.963711	0.96235	1.0144
12.38	0.96047	0.965262	0.963118	1.01557
12.43	0.96327	0.966627	0.960869	1.01531
12.48	0.962296	0.964767	0.962433	1.01271
12.53	0.963419	0.964972	0.959739	1.01445
12.58	0.962539	0.966225	0.964349	1.01561
12.63	0.961444	0.965309	0.963285	1.01391
12.68	0.959852	0.96558	0.963248	1.01516
12.73	0.960414	0.964496	0.966321	1.01549
12.78	0.961406	0.965225	0.964183	1.01552
12.83	0.963588	0.964402	0.965386	1.01459
12.88	0.964506	0.966627	0.959962	1.0168
12.93	0.962174	0.965701	0.965692	1.01583
12.98	0.962998	0.966533	0.961813	1.01194
13.03	0.963447	0.967327	0.960767	1.01269
13.08	0.963681	0.964281	0.960517	1.01413
13.13	0.962811	0.965505	0.961609	1.01404
13.18	0.963419	0.96472	0.963211	1.01237
13.23	0.963419	0.966795	0.96172	1.01409
13.28	0.961668	0.965683	0.963275	1.01487
13.33	0.963419	0.96586	0.96397	1.01288
13.38	0.961387	0.965599	0.963933	1.01388
13.43	0.963513	0.967645	0.963516	1.01147
13.48	0.963129	0.966533	0.960702	1.01372
13.53	0.962333	0.967215	0.964062	1.01387
13.58	0.962736	0.966047	0.963248	1.0141
13.63	0.962605	0.966514	0.964905	1.01467
13.68	0.960282	0.964047	0.961165	1.01169
13.73	0.965451	0.966393	0.96235	1.0121
13.78	0.964103	0.96843	0.965405	1.01433
13.83	0.964365	0.961963	0.963748	1.01154
13.88	0.964234	0.966271	0.961924	1.01484
13.93	0.965873	0.963888	0.9626	1.01134
13.98	0.963822	0.966608	0.96372	1.01168
14.03	0.963785	0.962589	0.965793	1.01358
14.08	0.964103	0.965365	0.963035	1.00894
14.13	0.964253	0.965599	0.961776	1.01183
14.18	0.96106	0.966019	0.964007	1.01171
14.23	0.964674	0.965365	0.964507	1.01036
14.28	0.964599	0.96657	0.962859	1.01129
14.33	0.965348	0.964832	0.961804	1.01128
14.38	0.967811	0.966963	0.964359	1.00975
14.43	0.961612	0.966085	0.964275	1.00933
14.48	0.964684	0.967066	0.964433	1.01129
14.53	0.965114	0.965019	0.961711	1.0112
14.58	0.964637	0.966533	0.965719	1.00865
14.63	0.965011	0.967823	0.96422	1.01104
14.68	0.962979	0.967879	0.964294	1.00838
14.73	0.96547	0.96729	0.96571	1.00938
14.78	0.963429	0.968084	0.962794	1.00837
14.83	0.96576	0.966851	0.963294	1.01038
14.88	0.964852	0.968131	0.964146	1.00689
14.93	0.964	0.968197	0.964081	1.01009
14.98	0.966622	0.969066	0.960767	1.00851
15.03	0.966266	0.968954	0.967589	1.01225
15.08	0.967933	0.968496	0.965618	1.00892
15.13	0.965423	0.967477	0.964655	1.01117
15.18	0.965976	0.969215	0.964099	1.01037
15.23	0.965882	0.966636	0.963118	1.01091
15.28	0.966547	0.968496	0.963192	1.0103
15.33	0.967877	0.968206	0.962313	1.00993
15.38	0.966687	0.969281	0.96534	1.00916
15.43	0.968373	0.970075	0.967386	1.0105
15.48	0.966434	0.968542	0.965442	1.00961
15.53	0.964477	0.970066	0.968422	1.00732
15.58	0.965976	0.969683	0.964507	1.00756
15.63	0.966678	0.969654	0.966932	1.00512
15.68	0.968607	0.970813	0.963831	1.0078
15.73	0.968279	0.969075	0.965127	1.00601
15.78	0.96665	0.968505	0.962868	1.00898
15.83	0.967474	0.968897	0.96385	1.01036
15.88	0.965545	0.969131	0.962007	1.00766
15.93	0.964927	0.968692	0.964581	1.00476
15.98	0.965517	0.969215	0.965451	1.00998
16.03	0.966125	0.968982	0.964932	1.00847
16.08	0.966369	0.970533	0.966941	1.00836
16.13	0.966678	0.970524	0.965618	1.00884
16.18	0.966875	0.96844	0.966479	1.00734
16.23	0.966004	0.970813	0.963553	1.00601
16.28	0.966397	0.970673	0.964932	1.00696
16.33	0.964815	0.97043	0.964127	1.00772
16.38	0.966069	0.96772	0.962729	1.00989
16.43	0.968008	0.970449	0.963924	1.01088
16.48	0.967633	0.970654	0.96235	1.01094
16.53	0.967568	0.970243	0.963581	1.00808
16.58	0.967174	0.970393	0.96172	1.00795
16.63	0.966856	0.970421	0.965025	1.00962
16.68	0.967165	0.970972	0.962303	1.00961
16.73	0.968251	0.969879	0.965756	1.00718
16.78	0.966659	0.971346	0.964044	1.00743
16.83	0.969234	0.973785	0.963738	1.00448
16.88	0.967633	0.970206	0.962109	1.00858
16.93	0.966491	0.973897	0.965201	1.00793
16.98	0.968495	0.972701	0.965784	1.00565
17.03	0.96562	0.972776	0.967043	1.00697
17.08	0.965873	0.972495	0.964896	1.00689
17.13	0.9693	0.967907	0.963794	1.00388
17.18	0.968504	0.972486	0.963424	1.00879
17.23	0.965386	0.971925	0.963451	1.0073
17.28	0.968326	0.970748	0.964303	1.008
17.33	0.966481	0.969711	0.963498	1.00686
17.38	0.968092	0.975019	0.961443	1.00526
17.43	0.965208	0.975187	0.964497	1.00553
17.48	0.968176	0.970608	0.965793	1.00815
17.53	0.966453	0.972795	0.963377	1.00623
17.58	0.96665	0.973327	0.964896	1.00424
17.63	0.967661	0.97386	0.964451	1.00572
17.68	0.971042	0.972804	0.962803	1.00633
17.73	0.9693	0.974047	0.962276	1.00448
17.78	0.969656	0.97315	0.962998	1.00474
17.83	0.968644	0.974215	0.963933	1.006
17.88	0.967324	0.973187	0.964886	1.00402
17.93	0.967998	0.971879	0.964238	1.00656
17.98	0.969759	0.974841	0.964396	1.00593
18.03	0.967652	0.974776	0.964932	1.00734
18.08	0.968373	0.972252	0.964757	1.00394
18.13	0.968663	0.973935	0.963711	1.00221
18.18	0.972203	0.973944	0.965488	1.00395
18.23	0.968523	0.972159	0.964405	1.00369
18.28	0.966875	0.971963	0.965488	1.00172
18.33	0.968757	0.975607	0.964664	1.00364
18.38	0.969553	0.973785	0.96284	1.00024
18.43	0.970367	0.974187	0.965173	1.0023
18.48	0.970873	0.97743	0.964322	1.00388
18.53	0.969328	0.974122	0.964775	1.00442
18.58	0.969188	0.973879	0.963442	1.00354
18.63	0.971341	0.975561	0.96546	1.00317
18.68	0.966921	0.974785	0.963081	1.00317
18.73	0.968626	0.974355	0.965071	1.00377
18.78	0.967661	0.973402	0.964553	1.00089
18.83	0.970152	0.972206	0.965294	1.00267
18.88	0.97063	0.975449	0.965673	1.0022
18.93	0.97033	0.972935	0.965358	1.0043
18.98	0.970911	0.970617	0.965655	1.00377
19.03	0.970246	0.974897	0.966914	1.00291
19.08	0.967867	0.970954	0.965636	1.00287
19.13	0.969356	0.973402	0.963433	1.0033
19.18	0.970227	0.973682	0.964044	1.00241
19.23	0.96915	0.974439	0.96559	1.00578
19.28	0.971426	0.974346	0.96434	1.00124
19.33	0.969122	0.970598	0.96808	1.00457
19.38	0.96945	0.97314	0.964627	1.0029
19.43	0.969487	0.97272	0.967682	1.00288
19.48	0.96959	0.973271	0.966099	1.0028
19.53	0.969534	0.972047	0.967238	1.00335
19.58	0.968616	0.972075	0.966441	1.0021
19.63	0.970995	0.973832	0.964053	0.999231
19.68	0.971557	0.971795	0.965099	1.00134
19.73	0.969337	0.973682	0.96434	1.00357
19.78	0.970583	0.975121	0.96497	0.998432
19.83	0.971145	0.975234	0.96522	1.00062
