# Supplementary material for: Towards a molecular mechanism underlying mitochondrial protein import through the TOM and TIM23 complexes
Source: eLife. 2022 Jun 8;11:e75426. doi: 10.7554/eLife.75426 (PMC9255969; doi:10.7554/eLife.75426)
Supplement: Figure 6—source data 1. [file elife-75426-fig6-data1.xlsx]

## Sheet: Sheet1
PCP	MTS length	mature length	precursor length	pI (mature)	net charge (mature)	number pos	number neg
L	37	124	161	4.87	-11	12	23
DL	37	230	267	4.67	-19	23	42
DDL	37	336	373	4.59	-27	34	61
DDDL	37	442	479	4.56	-35	45	80
LDDD	37	442	479	4.56	-35	45	80
DLDD	37	442	479	4.56	-35	45	80
DDLD	37	442	479	4.56	-35	45	80
(DDDL)	37	442	479	4.56	-35	45	80
F1 alpha	36	543	579	6.98	-1	61	62
F1 beta	32	512	544	5.43	-15	52	67
MRP21	17	196	213	10	13	36	23
ACP1	37	124	161	4.87	-11	12	23
-13pos	31	172	203	4.97	-12	5	17
-8pos	31	172	203	5.73	-7	10	17
+8neg	31	172	203	5.76	-7	18	25
native	31	172	203	7.97	1	18	17
+8pos	31	172	203	9.52	9	26	17
-8neg	31	172	203	9.64	9	18	9
-17neg	31	172	203	10.4	18	18	0
