# Supplementary material for: Towards a molecular mechanism underlying mitochondrial protein import through the TOM and TIM23 complexes
Source: eLife. 2022 Jun 8;11:e75426. doi: 10.7554/eLife.75426 (PMC9255969; doi:10.7554/eLife.75426)
Supplement: Figure 6—source data 2. [file elife-75426-fig6-data2.xlsx]

## Sheet: Sheet1
time	native	+8pos	+8neg	-8pos	-8neg	-17neg	-13pos
0.316667	0.106296
0.416667	0.162516
0.516667	0.22448
0.616667	0.289244
0.716667	0.352394
0.816667	0.410825
0.916667	0.458904
1.01667	0.499347
1.11667	0.537842
1.21667	0.567737
1.31667	0.588616
1.41667	0.610061
1.51667	0.631202
1.61667	0.645316
1.71667	0.65752
1.81667	0.679408
1.91667	0.692235
2.01667	0.70451
2.11667	0.721466
2.21667	0.73427
2.31667	0.745077
2.41667	0.755145
2.51667	0.766511
2.61667	0.777277
2.71667	0.790321
2.81667	0.797224
2.91667	0.808673
3.01667	0.816429
3.11667	0.825434
3.21667	0.831286
3.31667	0.846234
3.41667	0.845213
3.51667	0.84876
3.61667	0.859777
3.71667	0.863257
3.81667	0.877841
3.91667	0.879673
4.01667	0.888625
4.11667	0.891309
4.21667	0.897026
4.31667	0.898907
4.41667	0.902375
4.51667	0.91173
4.61667	0.915559
4.71667	0.918062
4.81667	0.920773
4.91667	0.921317
5.01667	0.929204
5.11667	0.934091
5.21667	0.933678
5.31667	0.935037
5.41667	0.940476
5.51667	0.941599
5.61667	0.947631
5.71667	0.95042
5.81667	0.944793
5.91667	0.95131
6.01667	0.953825
6.11667	0.958611
6.21667	0.966058
6.31667	0.960735
6.41667	0.962222
6.51667	0.962751
6.61667	0.964579
6.71667	0.964493
6.81667	0.972969
6.91667	0.968513
7.01667	0.97244
7.11667	0.970856
7.21667	0.975094
7.31667	0.978543
7.41667	0.972196
7.51667	0.978476
7.61667	0.979685
7.71667	0.980161
7.81667	0.979294
7.91667	0.97375
8.01667	0.978112
8.11667	0.979204
8.21667	0.982353
8.31667	0.984264
8.41667	0.979167
8.51667	0.983532
8.61667	0.987639
8.71667	0.981734
8.81667	0.986254
8.91667	0.984441
9.01667	0.988585
9.11667	0.986471
9.21667	0.984733
9.31667	0.989786
9.41667	0.987699
9.51667	0.983998
9.61667	0.993806
9.71667	0.987492
9.81667	0.988889
9.91667	0.989013
10.0167	0.993367
10.1167	0.993859
10.2167	0.993491
10.3167	0.987038
10.4167	0.988821
10.5167	0.987338
10.6167	0.989137
10.7167	0.991344
10.8167	0.986359
10.9167	0.992545
11.0167	0.995124
11.1167	0.98595
11.2167	0.993896
11.3167	0.996603
11.4167	1
11.5167	0.995995
11.6167	0.993513
11.7167	0.991002
11.8167	0.989752
11.9167	0.993315
12.0167	0.990206
12.1167	0.994489
12.2167	0.998769
12.3167	0.99217
12.4167	0.988386
12.5167	0.997462
12.6167	0.991742
12.7167	0.992857
12.8167	0.994471
12.9167	0.991441
13.0167	0.992504
13.1167	0.993097
13.2167	0.993574
13.3167	0.993176
13.4167	0.988093
13.5167	0.991926
13.6167	0.994992
13.7167	0.993074
13.8167	0.992654
13.9167	0.989861
14.0167	0.991539
14.1167	0.994339
14.2167	0.995751
14.3167	0.997226
14.4167	0.990281
14.5167	0.993559
14.6167	0.9958
14.7167	0.992068
14.8167	0.992068
14.9167	0.995458
15.0167	0.989028
15.1167	0.995083
15.2167	0.987725
15.3167	0.989279
15.4167	0.992136
15.5167	0.985052
15.6167	0.982808
15.7167	0.994752
15.8167	0.990687
15.9167	0.993149
16.0167	0.990961
16.1167	0.990713
16.2167	0.990034
16.3167	0.99104
16.4167	0.990353
16.5167	0.984095
16.6167	0.987459
16.7167	0.984602
16.8167	0.992455
16.9167	0.983217
17.0167	0.99116
17.1167	0.986434
17.2167	0.984403
17.3167	0.984929
17.4167	0.988412
17.5167	0.990248
17.6167	0.989212
17.7167	0.983183
17.8167	0.98292
17.9167	0.986907
18.0167	0.983626
18.1167	0.982643
18.2167	0.989043
18.3167	0.984748
18.4167	0.983498
18.5167	0.986119
18.6167	0.98185
18.7167	0.979883
18.8167	0.977477
18.9167	0.984155
19.0167	0.9817
19.1167	0.978836
19.2167	0.977958
19.3167	0.984275
19.4167	0.978082
19.5167	0.980784
19.6167	0.97667
19.7167	0.983176
19.8167	0.977845
19.9167	0.981377
20.0167	0.976351
20.1167	0.976636
20.2167	0.980642
20.3167	0.975101
20.4167	0.9836
20.5167	0.97429
20.6167	0.973588
20.7167	0.98232
20.8167	0.971396
20.9167	0.972826
21.0167	0.973956
21.1167	0.973648
21.2167	0.972042
21.3167	0.972346
21.4167	0.97345
21.5167	0.975589
21.6167	0.976287
21.7167	0.973172
21.8167	0.970326
21.9167	0.97521
22.0167	0.970431
22.1167	0.969377
22.2167	0.976528
22.3167	0.97286
22.4167	0.970751
22.5167	0.972579
22.6167	0.972019
22.7167	0.969902
22.8167	0.968851
22.9167	0.970473
23.0167	0.969245
23.1167	0.967564
23.2167	0.967894
23.3167	0.969204
23.4167	0.970202
23.5167	0.971854
23.6167	0.969129
23.7167	0.965026
23.8167	0.967087
23.9167	0.963427
24.0167	0.960086
24.1167	0.962128
24.2167	0.967894
24.3167	0.962815
24.4167	0.963498
24.5167	0.96244
24.6167	0.966482
24.7167	0.966862
24.8167	0.963825
24.9167	0.956771
25.0167	0.960923
25.1167	0.959178
25.2167	0.958483
25.3167	0.963164
25.4167	0.958964
25.5167	0.960623
25.6167	0.958254
25.7167	0.955048
25.8167	0.958656
25.9167	0.959042
26.0167	0.951944
26.1167	0.958374
26.2167	0.959913
26.3167	0.950623
26.4167	0.95503
26.5167	0.954343
26.6167	0.954673
26.7167	0.95866
26.8167	0.951043
26.9167	0.960079
27.0167	0.954966
27.1167	0.954955
27.2167	0.952327
27.3167	0.95634
27.4167	0.947064
27.5167	0.94774
27.6167	0.952241
27.7167	0.950026
27.8167	0.95456
27.9167	0.953971
28.0167	0.95441
28.1167	0.943093
28.2167	0.94664
28.3167	0.942635
28.4167	0.95238
28.5167	0.950818
28.6167	0.945131
28.7167	0.949324
28.8167	0.948885
28.9167	0.947079
29.0167	0.946516
29.1167	0.945897
29.2167	0.941276
29.3167	0.943967
29.4167	0.944624
29.5167	0.947057
29.6167	0.94322
29.7167	0.944114
29.8167	0.939917
29.9167	0.945105
30.0167	0.940026
30.1167	0.941527
30.2167	0.943299
0.287778		0.10458
0.387778		0.14627
0.487778		0.183958
0.587778		0.21957
0.687778		0.255411
0.787778		0.287476
0.887778		0.315663
0.987778		0.34412
1.08778		0.378787
1.18778		0.402875
1.28778		0.429943
1.38778		0.449744
1.48778		0.47351
1.58778		0.497402
1.68778		0.516543
1.78778		0.541093
1.88778		0.560143
1.98778		0.580222
2.08778		0.593315
2.18778		0.614288
2.28778		0.628451
2.38778		0.645771
2.48778		0.661765
2.58778		0.6738
2.68778		0.691327
2.78778		0.708958
2.88778		0.717824
2.98778		0.730497
3.08778		0.740103
3.18778		0.752397
3.28778		0.762915
3.38778		0.774304
3.48778		0.780366
3.58778		0.794413
3.68778		0.804728
3.78778		0.80736
3.88778		0.82266
3.98778		0.828441
4.08778		0.834368
4.18778		0.84456
4.28778		0.848974
4.38778		0.84885
4.48778		0.85876
4.58778		0.861835
4.68778		0.8709
4.78778		0.872
4.88778		0.878591
4.98778		0.882075
5.08778		0.885209
5.18778		0.892128
5.28778		0.893374
5.38778		0.893554
5.48778		0.896565
5.58778		0.898899
5.68778		0.905769
5.78778		0.912601
5.88778		0.916463
5.98778		0.911966
6.08778		0.917139
6.18778		0.921141
6.28778		0.92715
6.38778		0.926895
6.48778		0.927905
6.58778		0.930307
6.68778		0.928412
6.78778		0.931918
6.88778		0.936403
6.98778		0.938491
7.08778		0.936801
7.18778		0.937766
7.28778		0.944812
7.38778		0.940048
7.48778		0.943787
7.58778		0.94664
7.68778		0.946843
7.78778		0.942413
7.88778		0.948164
7.98778		0.95033
8.08778		0.950011
8.18778		0.949136
8.28778		0.955923
8.38778		0.954403
8.48778		0.957346
8.58778		0.96194
8.68778		0.963648
8.78778		0.958307
8.88778		0.957736
8.98778		0.968476
9.08778		0.964568
9.18778		0.961704
9.28778		0.966888
9.38778		0.966066
9.48778		0.968821
9.58778		0.970781
9.68778		0.965949
9.78778		0.969662
9.88778		0.970225
9.98778		0.97131
10.0878		0.970454
10.1878		0.968675
10.2878		0.969643
10.3878		0.963412
10.4878		0.972102
10.5878		0.975431
10.6878		0.976475
10.7878		0.977312
10.8878		0.973814
10.9878		0.974373
11.0878		0.974163
11.1878		0.975634
11.2878		0.977624
11.3878		0.980751
11.4878		0.974197
11.5878		0.979163
11.6878		0.976261
11.7878		0.976445
11.8878		0.975019
11.9878		0.981528
12.0878		0.976569
12.1878		0.975773
12.2878		0.979534
12.3878		0.977185
12.4878		0.975334
12.5878		0.974673
12.6878		0.979069
12.7878		0.980803
12.8878		0.977778
12.9878		0.975225
13.0878		0.97259
13.1878		0.97497
13.2878		0.98063
13.3878		0.974962
13.4878		0.979542
13.5878		0.973322
13.6878		0.974035
13.7878		0.975172
13.8878		0.976351
13.9878		0.980799
14.0878		0.980169
14.1878		0.974861
14.2878		0.977691
14.3878		0.98009
14.4878		0.980214
14.5878		0.979392
14.6878		0.975529
14.7878		0.972586
14.8878		0.976111
14.9878		0.973236
15.0878		0.980439
15.1878		0.97292
15.2878		0.974553
15.3878		0.974013
15.4878		0.97786
15.5878		0.976453
15.6878		0.974414
15.7878		0.973532
15.8878		0.966888
15.9878		0.971231
16.0878		0.970653
16.1878		0.970278
16.2878		0.973232
16.3878		0.971888
16.4878		0.973438
16.5878		0.97518
16.6878		0.968986
16.7878		0.967365
16.8878		0.965075
16.9878		0.972718
17.0878		0.968603
17.1878		0.96881
17.2878		0.971483
17.3878		0.961651
17.4878		0.970469
17.5878		0.969377
17.6878		0.967252
17.7878		0.962064
17.8878		0.964617
17.9878		0.96664
18.0878		0.962335
18.1878		0.966929
18.2878		0.963603
18.3878		0.966708
18.4878		0.964287
18.5878		0.960882
18.6878		0.962237
18.7878		0.961235
18.8878		0.955037
18.9878		0.959103
19.0878		0.96247
19.1878		0.958622
19.2878		0.958431
19.3878		0.95622
19.4878		0.957684
19.5878		0.957537
19.6878		0.957766
19.7878		0.95661
19.8878		0.958157
19.9878		0.954219
20.0878		0.95688
20.1878		0.95518
20.2878		0.956021
20.3878		0.948735
20.4878		0.950649
20.5878		0.945259
20.6878		0.945559
20.7878		0.954271
20.8878		0.947905
20.9878		0.950454
21.0878		0.946077
21.1878		0.94551
21.2878		0.948397
21.3878		0.947518
21.4878		0.944279
21.5878		0.946186
21.6878		0.94631
21.7878		0.944553
21.8878		0.94512
21.9878		0.947042
22.0878		0.943153
22.1878		0.94036
22.2878		0.946167
22.3878		0.941967
22.4878		0.944016
22.5878		0.937477
22.6878		0.940529
22.7878		0.940071
22.8878		0.942237
22.9878		0.940671
23.0878		0.939981
23.1878		0.93747
23.2878		0.934977
23.3878		0.928885
23.4878		0.933734
23.5878		0.931313
23.6878		0.931298
23.7878		0.929853
23.8878		0.927867
23.9878		0.93471
24.0878		0.931054
24.1878		0.928085
24.2878		0.933907
24.3878		0.927165
24.4878		0.93179
24.5878		0.92974
24.6878		0.930855
24.7878		0.929196
24.8878		0.929763
24.9878		0.926268
25.0878		0.922229
25.1878		0.922248
25.2878		0.920968
25.3878		0.925544
25.4878		0.923288
25.5878		0.920059
25.6878		0.921347
25.7878		0.916741
25.8878		0.921204
25.9878		0.919038
26.0878		0.920525
26.1878		0.913926
26.2878		0.911054
26.3878		0.91792
26.4878		0.913813
26.5878		0.919872
26.6878		0.915469
26.7878		0.913997
26.8878		0.917529
26.9878		0.921163
27.0878		0.914166
27.1878		0.911869
27.2878		0.913727
27.3878		0.915258
27.4878		0.911174
27.5878		0.91355
27.6878		0.9095
27.7878		0.909016
27.8878		0.902375
27.9878		0.906812
28.0878		0.904455
28.1878		0.907439
28.2878		0.905164
28.3878		0.904744
28.4878		0.904286
28.5878		0.902304
28.6878		0.900315
28.7878		0.901861
28.8878		0.90206
28.9878		0.898385
29.0878		0.900093
29.1878		0.897503
29.2878		0.892
29.3878		0.898539
29.4878		0.896955
29.5878		0.899481
29.6878		0.889665
29.7878		0.895292
29.8878		0.895217
29.9878		0.895513
30.0878		0.890498
30.1878		0.889935
0.258889			0.026749
0.358889			0.036502
0.458889			0.049186
0.558889			0.064584
0.658889			0.082587
0.758889			0.106247
0.858889			0.128244
0.958889			0.152148
1.05889			0.181593
1.15889			0.21115
1.25889			0.242348
1.35889			0.26915
1.45889			0.295824
1.55889			0.329207
1.65889			0.356365
1.75889			0.386771
1.85889			0.411606
1.95889			0.442777
2.05889			0.467158
2.15889			0.491464
2.25889			0.515409
2.35889			0.537891
2.45889			0.564359
2.55889			0.584805
2.65889			0.607261
2.75889			0.626596
2.85889			0.644975
2.95889			0.666041
3.05889			0.680838
3.15889			0.700159
3.25889			0.717704
3.35889			0.730276
3.45889			0.744428
3.55889			0.762806
3.65889			0.780392
3.75889			0.792994
3.85889			0.799976
3.95889			0.817476
4.05889			0.826241
4.15889			0.837668
4.25889			0.849316
4.35889			0.863171
4.45889			0.872923
4.55889			0.878141
4.65889			0.894316
4.75889			0.898351
4.85889			0.913258
4.95889			0.919526
5.05889			0.929316
5.15889			0.933802
5.25889			0.949842
5.35889			0.95206
5.45889			0.966385
5.55889			0.970826
5.65889			0.979579
5.75889			0.985435
5.85889			0.997601
5.95889			0.998923
6.05889			1.0096
6.15889			1.01659
6.25889			1.02315
6.35889			1.03018
6.45889			1.03758
6.55889			1.04439
6.65889			1.04979
6.75889			1.0492
6.85889			1.06061
6.95889			1.0619
7.05889			1.0654
7.15889			1.07503
7.25889			1.0861
7.35889			1.08823
7.45889			1.09124
7.55889			1.09713
7.65889			1.10411
7.75889			1.10485
7.85889			1.10884
7.95889			1.11238
8.05889			1.1239
8.15889			1.12301
8.25889			1.1339
8.35889			1.13068
8.45889			1.1375
8.55889			1.13824
8.65889			1.1374
8.75889			1.14663
8.85889			1.14469
8.95889			1.14555
9.05889			1.15814
9.15889			1.15753
9.25889			1.16141
9.35889			1.16011
9.45889			1.1679
9.55889			1.17256
9.65889			1.1692
9.75889			1.17568
9.85889			1.1761
9.95889			1.17616
10.0589			1.18351
10.1589			1.18118
10.2589			1.18866
10.3589			1.19244
10.4589			1.19236
10.5589			1.19307
10.6589			1.19924
10.7589			1.19958
10.8589			1.2028
10.9589			1.20188
11.0589			1.20509
11.1589			1.20885
11.2589			1.20675
11.3589			1.20956
11.4589			1.20758
11.5589			1.21677
11.6589			1.21581
11.7589			1.21515
11.8589			1.22219
11.9589			1.22316
12.0589			1.2227
12.1589			1.21954
12.2589			1.22769
12.3589			1.22583
12.4589			1.22595
12.5589			1.22426
12.6589			1.23116
12.7589			1.23227
12.8589			1.22549
12.9589			1.22678
13.0589			1.23141
13.1589			1.22713
13.2589			1.23719
13.3589			1.23377
13.4589			1.23212
13.5589			1.24435
13.6589			1.23943
13.7589			1.23942
13.8589			1.24182
13.9589			1.23883
14.0589			1.24011
14.1589			1.24497
14.2589			1.24283
14.3589			1.24207
14.4589			1.2486
14.5589			1.23849
14.6589			1.24723
14.7589			1.25287
14.8589			1.24282
14.9589			1.24333
15.0589			1.2477
15.1589			1.24484
15.2589			1.24669
15.3589			1.25298
15.4589			1.25061
15.5589			1.25043
15.6589			1.24964
15.7589			1.24971
15.8589			1.2486
15.9589			1.24749
16.0589			1.25347
16.1589			1.25308
16.2589			1.24941
16.3589			1.25239
16.4589			1.25029
16.5589			1.25161
16.6589			1.24538
16.7589			1.25112
16.8589			1.24904
16.9589			1.24883
17.0589			1.24969
17.1589			1.25026
17.2589			1.24877
17.3589			1.24817
17.4589			1.25069
17.5589			1.24828
17.6589			1.24928
17.7589			1.25207
17.8589			1.25279
17.9589			1.25145
18.0589			1.24987
18.1589			1.25294
18.2589			1.24885
18.3589			1.25809
18.4589			1.24809
18.5589			1.25019
18.6589			1.25116
18.7589			1.2407
18.8589			1.25127
18.9589			1.2513
19.0589			1.25131
19.1589			1.24886
19.2589			1.24992
19.3589			1.25526
19.4589			1.24953
19.5589			1.24717
19.6589			1.24937
19.7589			1.24469
19.8589			1.25336
19.9589			1.25059
20.0589			1.24617
20.1589			1.24229
20.2589			1.24642
20.3589			1.24253
20.4589			1.25035
20.5589			1.24374
20.6589			1.24419
20.7589			1.24222
20.8589			1.23902
20.9589			1.23861
21.0589			1.23914
21.1589			1.24579
21.2589			1.23121
21.3589			1.24266
21.4589			1.23776
21.5589			1.23061
21.6589			1.23627
21.7589			1.23999
21.8589			1.23303
21.9589			1.23269
22.0589			1.23277
22.1589			1.23786
22.2589			1.23604
22.3589			1.2358
22.4589			1.23579
22.5589			1.23305
22.6589			1.23439
22.7589			1.2394
22.8589			1.23029
22.9589			1.2286
23.0589			1.22379
23.1589			1.23167
23.2589			1.22907
23.3589			1.22873
23.4589			1.22642
23.5589			1.22302
23.6589			1.21755
23.7589			1.22308
23.8589			1.22168
23.9589			1.22523
24.0589			1.21987
24.1589			1.22112
24.2589			1.22037
24.3589			1.22551
24.4589			1.21816
24.5589			1.21581
24.6589			1.22383
24.7589			1.21681
24.8589			1.21933
24.9589			1.21326
25.0589			1.21637
25.1589			1.20854
25.2589			1.21363
25.3589			1.21238
25.4589			1.21008
25.5589			1.21252
25.6589			1.20658
25.7589			1.20822
25.8589			1.20638
25.9589			1.20955
26.0589			1.20465
26.1589			1.2029
26.2589			1.20377
26.3589			1.20204
26.4589			1.20439
26.5589			1.20114
26.6589			1.19958
26.7589			1.20453
26.8589			1.20114
26.9589			1.20356
27.0589			1.20013
27.1589			1.20334
27.2589			1.19953
27.3589			1.20386
27.4589			1.19369
27.5589			1.19711
27.6589			1.19353
27.7589			1.19594
27.8589			1.19223
27.9589			1.19101
28.0589			1.1919
28.1589			1.19892
28.2589			1.18812
28.3589			1.18653
28.4589			1.19447
28.5589			1.18714
28.6589			1.18906
28.7589			1.19034
28.8589			1.18727
28.9589			1.18337
29.0589			1.18487
29.1589			1.18217
29.2589			1.17542
29.3589			1.18287
29.4589			1.17576
29.5589			1.17343
29.6589			1.18044
29.7589			1.17679
29.8589			1.17574
29.9589			1.1779
30.0589			1.16516
30.1589			1.17045
0.23				0.040282
0.33				0.063503
0.43				0.096829
0.53				0.135782
0.63				0.178507
0.73				0.225441
0.83				0.27501
0.93				0.32153
1.03				0.368978
1.13				0.413299
1.23				0.454977
1.33				0.497275
1.43				0.534527
1.53				0.570905
1.63				0.604993
1.73				0.634592
1.83				0.667073
1.93				0.693316
2.03				0.717952
2.13				0.740839
2.23				0.766473
2.33				0.783812
2.43				0.806838
2.53				0.828606
2.63				0.842784
2.73				0.860539
2.83				0.882274
2.93				0.891347
3.03				0.910363
3.13				0.932702
3.23				0.941475
3.33				0.95491
3.43				0.964808
3.53				0.982023
3.63				0.990867
3.73				1.0055
3.83				1.01396
3.93				1.02766
4.03				1.03994
4.13				1.04696
4.23				1.05499
4.33				1.06847
4.43				1.06947
4.53				1.08023
4.63				1.0893
4.73				1.09802
4.83				1.11285
4.93				1.11589
5.03				1.12526
5.13				1.12878
5.23				1.1364
5.33				1.14097
5.43				1.14662
5.53				1.15538
5.63				1.16507
5.73				1.16461
5.83				1.17578
5.93				1.17868
6.03				1.1858
6.13				1.18517
6.23				1.18924
6.33				1.20336
6.43				1.20444
6.53				1.20628
6.63				1.21718
6.73				1.22078
6.83				1.21784
6.93				1.21685
7.03				1.22916
7.13				1.23299
7.23				1.23624
7.33				1.24216
7.43				1.24815
7.53				1.24764
7.63				1.24519
7.73				1.25967
7.83				1.25684
7.93				1.26125
8.03				1.26141
8.13				1.25747
8.23				1.263
8.33				1.26648
8.43				1.266
8.53				1.27374
8.63				1.26556
8.73				1.27635
8.83				1.27573
8.93				1.27168
9.03				1.28058
9.13				1.28091
9.23				1.28064
9.33				1.28646
9.43				1.28268
9.53				1.28947
9.63				1.28899
9.73				1.28677
9.83				1.29032
9.93				1.30012
10.03				1.30086
10.13				1.29664
10.23				1.30476
10.33				1.3064
10.43				1.29845
10.53				1.30615
10.63				1.30574
10.73				1.30982
10.83				1.31419
10.93				1.3061
11.03				1.30789
11.13				1.30786
11.23				1.31598
11.33				1.31938
11.43				1.31653
11.53				1.31548
11.63				1.31303
11.73				1.32011
11.83				1.3198
11.93				1.32004
12.03				1.31444
12.13				1.32386
12.23				1.32058
12.33				1.31631
12.43				1.3175
12.53				1.32594
12.63				1.32179
12.73				1.32448
12.83				1.32215
12.93				1.32382
13.03				1.32435
13.13				1.32902
13.23				1.328
13.33				1.32571
13.43				1.31801
13.53				1.32548
13.63				1.32287
13.73				1.33261
13.83				1.3219
13.93				1.32459
14.03				1.3254
14.13				1.32643
14.23				1.32006
14.33				1.32293
14.43				1.32504
14.53				1.32461
14.63				1.32762
14.73				1.32875
14.83				1.32366
14.93				1.32417
15.03				1.3227
15.13				1.32318
15.23				1.32422
15.33				1.31824
15.43				1.32078
15.53				1.31627
15.63				1.31865
15.73				1.31808
15.83				1.31619
15.93				1.3199
16.03				1.31689
16.13				1.30995
16.23				1.31709
16.33				1.31681
16.43				1.31602
16.53				1.30762
16.63				1.31069
16.73				1.31462
16.83				1.31199
16.93				1.31003
17.03				1.31176
17.13				1.31162
17.23				1.31485
17.33				1.31051
17.43				1.30495
17.53				1.3144
17.63				1.31241
17.73				1.31032
17.83				1.30577
17.93				1.30456
18.03				1.30509
18.13				1.30133
18.23				1.30442
18.33				1.29884
18.43				1.31042
18.53				1.3021
18.63				1.30607
18.73				1.29956
18.83				1.29401
18.93				1.30261
19.03				1.29624
19.13				1.28975
19.23				1.29151
19.33				1.29447
19.43				1.29388
19.53				1.29601
19.63				1.29045
19.73				1.28715
19.83				1.29213
19.93				1.2911
20.03				1.29129
20.13				1.28721
20.23				1.28843
20.33				1.27817
20.43				1.2909
20.53				1.29058
20.63				1.28994
20.73				1.28209
20.83				1.27872
20.93				1.28333
21.03				1.2848
21.13				1.27535
21.23				1.28134
21.33				1.2823
21.43				1.27794
21.53				1.27387
21.63				1.27145
21.73				1.27464
21.83				1.27407
21.93				1.27054
22.03				1.27763
22.13				1.27312
22.23				1.26725
22.33				1.26642
22.43				1.26908
22.53				1.26403
22.63				1.26903
22.73				1.26453
22.83				1.26894
22.93				1.26565
23.03				1.26462
23.13				1.26586
23.23				1.2611
23.33				1.26155
23.43				1.2637
23.53				1.25972
23.63				1.25746
23.73				1.25404
23.83				1.25733
23.93				1.25398
24.03				1.25363
24.13				1.25358
24.23				1.25115
24.33				1.24855
24.43				1.25215
24.53				1.25114
24.63				1.24575
24.73				1.24402
24.83				1.24544
24.93				1.24222
25.03				1.23793
25.13				1.24078
25.23				1.24167
25.33				1.245
25.43				1.23731
25.53				1.23797
25.63				1.23766
25.73				1.23151
25.83				1.23419
25.93				1.23049
26.03				1.23376
26.13				1.23147
26.23				1.24191
26.33				1.23613
26.43				1.22461
26.53				1.23172
26.63				1.22549
26.73				1.22687
26.83				1.22446
26.93				1.22277
27.03				1.22291
27.13				1.22017
27.23				1.2187
27.33				1.22555
27.43				1.21315
27.53				1.21766
27.63				1.21553
27.73				1.21417
27.83				1.21325
27.93				1.22008
28.03				1.21398
28.13				1.21005
28.23				1.20999
28.33				1.21204
28.43				1.21199
28.53				1.20353
28.63				1.21065
28.73				1.20278
28.83				1.20456
28.93				1.19728
29.03				1.19818
29.13				1.20314
29.23				1.19709
29.33				1.20127
29.43				1.19924
29.53				1.20136
29.63				1.19765
29.73				1.18775
29.83				1.18997
29.93				1.19846
30.03				1.19384
30.13				1.18804
0.201111					0.057328
0.301111					0.103499
0.401111					0.155121
0.501111					0.201116
0.601111					0.241916
0.701111					0.277877
0.801111					0.302559
0.901111					0.329965
1.00111					0.350168
1.10111					0.371534
1.20111					0.387507
1.30111					0.411182
1.40111					0.427026
1.50111					0.442012
1.60111					0.458112
1.70111					0.474955
1.80111					0.490968
1.90111					0.504711
2.00111					0.517571
2.10111					0.531333
2.20111					0.545961
2.30111					0.554328
2.40111					0.566476
2.50111					0.576194
2.60111					0.586303
2.70111					0.600252
2.80111					0.607077
2.90111					0.619644
3.00111					0.629963
3.10111					0.637081
3.20111					0.645617
3.30111					0.654033
3.40111					0.657009
3.50111					0.667753
3.60111					0.675298
3.70111					0.682055
3.80111					0.69332
3.90111					0.690613
4.00111					0.706946
4.10111					0.705095
4.20111					0.715647
4.30111					0.715512
4.40111					0.718913
4.50111					0.727963
4.60111					0.731447
4.70111					0.735933
4.80111					0.73912
4.90111					0.74778
5.00111					0.743782
5.10111					0.747325
5.20111					0.752224
5.30111					0.75683
5.40111					0.757761
5.50111					0.762652
5.60111					0.765494
5.70111					0.774289
5.80111					0.773591
5.90111					0.778632
6.00111					0.775712
6.10111					0.773842
6.20111					0.780103
6.30111					0.780794
6.40111					0.783305
6.50111					0.784766
6.60111					0.784608
6.70111					0.791583
6.80111					0.792217
6.90111					0.790558
7.00111					0.794357
7.10111					0.799518
7.20111					0.804642
7.30111					0.800723
7.40111					0.801954
7.50111					0.809405
7.60111					0.803786
7.70111					0.805933
7.80111					0.807972
7.90111					0.806121
8.00111					0.808959
8.10111					0.804646
8.20111					0.811849
8.30111					0.81156
8.40111					0.810877
8.50111					0.81546
8.60111					0.813073
8.70111					0.813407
8.80111					0.812953
8.90111					0.811613
9.00111					0.814522
9.10111					0.815599
9.20111					0.814203
9.30111					0.81927
9.40111					0.812585
9.50111					0.817101
9.60111					0.819315
9.70111					0.81403
9.80111					0.814826
9.90111					0.814939
10.0011					0.818711
10.1011					0.823129
10.2011					0.812236
10.3011					0.821962
10.4011					0.816579
10.5011					0.815059
10.6011					0.816571
10.7011					0.816883
10.8011					0.81385
10.9011					0.817029
11.0011					0.81992
11.1011					0.818433
11.2011					0.813313
11.3011					0.818715
11.4011					0.818193
11.5011					0.817987
11.6011					0.816305
11.7011					0.817814
11.8011					0.811485
11.9011					0.819848
12.0011					0.814184
12.1011					0.817713
12.2011					0.810982
12.3011					0.813523
12.4011					0.814984
12.5011					0.81915
12.6011					0.80665
12.7011					0.813437
12.8011					0.809222
12.9011					0.814165
13.0011					0.808032
13.1011					0.812243
13.2011					0.815667
13.3011					0.81409
13.4011					0.813794
13.5011					0.810809
13.6011					0.809788
13.7011					0.81608
13.8011					0.81278
13.9011					0.807844
14.0011					0.812086
14.1011					0.807213
14.2011					0.813827
14.3011					0.812724
14.4011					0.808095
14.5011					0.806354
14.6011					0.810487
14.7011					0.810772
14.8011					0.807149
14.9011					0.806106
15.0011					0.80439
15.1011					0.806436
15.2011					0.802352
15.3011					0.801068
15.4011					0.808749
15.5011					0.807521
15.6011					0.803512
15.7011					0.80183
15.8011					0.802326
15.9011					0.803565
16.0011					0.805956
16.1011					0.807803
16.2011					0.804086
16.3011					0.803925
16.4011					0.805366
16.5011					0.805074
16.6011					0.802258
16.7011					0.803366
16.8011					0.799732
16.9011					0.803144
17.0011					0.801331
17.1011					0.803715
17.2011					0.80251
17.3011					0.802585
17.4011					0.797547
17.5011					0.798835
17.6011					0.800584
17.7011					0.800708
17.8011					0.796361
17.9011					0.794826
18.0011					0.797502
18.1011					0.795021
18.2011					0.796305
18.3011					0.8001
18.4011					0.795633
18.5011					0.798929
18.6011					0.797754
18.7011					0.798722
18.8011					0.794942
18.9011					0.794657
19.0011					0.795411
19.1011					0.790614
19.2011					0.797007
19.3011					0.799875
19.4011					0.795712
19.5011					0.793163
19.6011					0.788929
19.7011					0.790205
19.8011					0.793039
19.9011					0.791857
20.0011					0.786162
20.1011					0.791432
20.2011					0.788407
20.3011					0.792014
20.4011					0.787457
20.5011					0.795355
20.6011					0.792881
20.7011					0.786695
20.8011					0.793959
20.9011					0.791087
21.0011					0.79064
21.1011					0.790888
21.2011					0.787393
21.3011					0.791519
21.4011					0.787239
21.5011					0.784206
21.6011					0.786181
21.7011					0.789698
21.8011					0.787956
21.9011					0.786241
22.0011					0.785077
22.1011					0.78888
22.2011					0.786391
22.3011					0.781838
22.4011					0.786485
22.5011					0.786766
22.6011					0.782844
22.7011					0.782956
22.8011					0.78088
22.9011					0.783046
23.0011					0.78251
23.1011					0.781263
23.2011					0.780689
23.3011					0.785892
23.4011					0.779413
23.5011					0.776263
23.6011					0.786849
23.7011					0.780096
23.8011					0.785426
23.9011					0.77647
24.0011					0.779142
24.1011					0.781402
24.2011					0.779251
24.3011					0.77317
24.4011					0.779458
24.5011					0.776684
24.6011					0.778981
24.7011					0.773959
24.8011					0.777438
24.9011					0.778857
25.0011					0.776218
25.1011					0.774612
25.2011					0.772705
25.3011					0.774375
25.4011					0.771995
25.5011					0.768767
25.6011					0.767434
25.7011					0.766102
25.8011					0.771312
25.9011					0.770419
26.0011					0.773838
26.1011					0.770347
26.2011					0.765648
26.3011					0.766151
26.4011					0.768816
26.5011					0.766609
26.6011					0.77278
26.7011					0.770873
26.8011					0.768549
26.9011					0.768561
27.0011					0.764161
27.1011					0.763335
27.2011					0.770381
27.3011					0.767626
27.4011					0.760858
27.5011					0.762911
27.6011					0.764416
27.7011					0.765231
27.8011					0.762397
27.9011					0.763422
28.0011					0.761894
28.1011					0.76564
28.2011					0.758801
28.3011					0.761289
28.4011					0.76284
28.5011					0.763842
28.6011					0.760299
28.7011					0.759664
28.8011					0.762423
28.9011					0.758061
29.0011					0.759251
29.1011					0.750223
29.2011					0.756387
29.3011					0.751203
29.4011					0.758729
29.5011					0.75394
29.6011					0.755771
29.7011					0.758838
29.8011					0.756199
29.9011					0.755456
30.0011					0.756654
30.1011					0.757821
0.172222						0.062241
0.272222						0.099918
0.372222						0.135035
0.472222						0.171094
0.572222						0.199532
0.672222						0.233512
0.772222						0.26302
0.872222						0.284143
0.972222						0.308929
1.07222						0.328141
1.17222						0.345292
1.27222						0.361256
1.37222						0.371617
1.47222						0.384057
1.57222						0.389256
1.67222						0.398907
1.77222						0.411692
1.87222						0.416981
1.97222						0.422984
2.07222						0.432774
2.17222						0.439658
2.27222						0.444391
2.37222						0.456982
2.47222						0.461126
2.57222						0.467789
2.67222						0.475953
2.77222						0.489576
2.87222						0.487541
2.97222						0.500199
3.07222						0.505045
3.17222						0.51271
3.27222						0.518589
3.37222						0.529156
3.47222						0.532684
3.57222						0.537819
3.67222						0.544891
3.77222						0.547677
3.87222						0.556543
3.97222						0.556479
4.07222						0.569967
4.17222						0.573315
4.27222						0.575853
4.37222						0.586679
4.47222						0.588353
4.57222						0.593124
4.67222						0.600245
4.77222						0.601401
4.87222						0.610722
4.97222						0.618177
5.07222						0.618255
5.17222						0.6252
5.27222						0.626551
5.37222						0.628657
5.47222						0.635609
5.57222						0.640399
5.67222						0.643286
5.77222						0.649885
5.87222						0.652024
5.97222						0.663184
6.07222						0.657588
6.17222						0.664427
6.27222						0.66404
6.37222						0.668428
6.47222						0.671968
6.57222						0.674611
6.67222						0.676488
6.77222						0.682865
6.87222						0.683016
6.97222						0.68603
7.07222						0.686563
7.17222						0.691308
7.27222						0.697828
7.37222						0.699258
7.47222						0.703797
7.57222						0.701807
7.67222						0.705692
7.77222						0.708722
7.87222						0.705722
7.97222						0.713102
8.07222						0.70859
8.17222						0.714183
8.27222						0.713106
8.37222						0.71841
8.47222						0.717577
8.57222						0.718902
8.67222						0.724923
8.77222						0.726203
8.87222						0.722246
8.97222						0.722948
9.07222						0.723767
9.17222						0.726391
9.27222						0.727367
9.37222						0.730366
9.47222						0.727798
9.57222						0.735178
9.67222						0.737322
9.77222						0.736871
9.87222						0.7349
9.97222						0.735261
10.0722						0.737213
10.1722						0.738012
10.2722						0.737171
10.3722						0.739518
10.4722						0.7368
10.5722						0.740899
10.6722						0.74231
10.7722						0.737314
10.8722						0.745043
10.9722						0.741811
11.0722						0.742217
11.1722						0.742982
11.2722						0.748091
11.3722						0.746826
11.4722						0.746252
11.5722						0.747757
11.6722						0.747731
11.7722						0.744837
11.8722						0.75067
11.9722						0.746372
12.0722						0.753557
12.1722						0.751143
12.2722						0.749135
12.3722						0.755186
12.4722						0.755032
12.5722						0.757348
12.6722						0.757145
12.7722						0.75707
12.8722						0.757051
12.9722						0.759169
13.0722						0.756909
13.1722						0.756
13.2722						0.750257
13.3722						0.756563
13.4722						0.756297
13.5722						0.759413
13.6722						0.757536
13.7722						0.752149
13.8722						0.753684
13.9722						0.757322
14.0722						0.754454
14.1722						0.762971
14.2722						0.758174
14.3722						0.757262
14.4722						0.756631
14.5722						0.755013
14.6722						0.753459
14.7722						0.757851
14.8722						0.754563
14.9722						0.758801
15.0722						0.75909
15.1722						0.755482
15.2722						0.75784
15.3722						0.755024
15.4722						0.758339
15.5722						0.758677
15.6722						0.754082
15.7722						0.754
15.8722						0.761087
15.9722						0.75894
16.0722						0.757851
16.1722						0.75448
16.2722						0.756173
16.3722						0.756552
16.4722						0.756256
16.5722						0.755835
16.6722						0.757476
16.7722						0.763928
16.8722						0.761556
16.9722						0.759998
17.0722						0.759754
17.1722						0.757509
17.2722						0.755918
17.3722						0.758193
17.4722						0.761541
17.5722						0.756871
17.6722						0.75552
17.7722						0.754657
17.8722						0.756143
17.9722						0.757926
18.0722						0.756064
18.1722						0.754807
18.2722						0.758054
18.3722						0.757573
18.4722						0.755847
18.5722						0.75472
18.6722						0.761995
18.7722						0.752104
18.8722						0.752693
18.9722						0.751635
19.0722						0.745516
19.1722						0.753677
19.2722						0.754518
19.3722						0.751999
19.4722						0.75228
19.5722						0.747153
19.6722						0.753538
19.7722						0.753373
19.8722						0.744135
19.9722						0.746376
20.0722						0.75171
20.1722						0.745726
20.2722						0.74891
20.3722						0.749878
20.4722						0.748609
20.5722						0.748737
20.6722						0.749574
20.7722						0.74674
20.8722						0.752502
20.9722						0.745584
21.0722						0.744108
21.1722						0.748234
21.2722						0.746248
21.3722						0.74454
21.4722						0.75683
21.5722						0.745392
21.6722						0.748208
21.7722						0.744116
21.8722						0.743831
21.9722						0.743129
22.0722						0.744953
22.1722						0.751447
22.2722						0.745467
22.3722						0.742453
22.4722						0.748271
22.5722						0.746695
22.6722						0.744536
22.7722						0.740843
22.8722						0.741886
22.9722						0.743572
23.0722						0.741034
23.1722						0.745527
23.2722						0.739859
23.3722						0.742798
23.4722						0.740813
23.5722						0.74109
23.6722						0.739382
23.7722						0.735291
23.8722						0.737813
23.9722						0.736575
24.0722						0.737014
24.1722						0.738996
24.2722						0.735966
24.3722						0.736879
24.4722						0.73558
24.5722						0.73692
24.6722						0.736976
24.7722						0.729641
24.8722						0.733087
24.9722						0.733969
25.0722						0.734518
25.1722						0.732892
25.2722						0.733939
25.3722						0.733309
25.4722						0.73234
25.5722						0.733406
25.6722						0.73037
25.7722						0.732378
25.8722						0.730242
25.9722						0.728999
26.0722						0.729975
26.1722						0.729964
26.2722						0.728478
26.3722						0.732599
26.4722						0.728534
26.5722						0.730861
26.6722						0.72698
26.7722						0.727404
26.8722						0.725332
26.9722						0.724889
27.0722						0.72781
27.1722						0.72784
27.2722						0.725745
27.3722						0.724213
27.4722						0.722794
27.5722						0.723981
27.6722						0.718121
27.7722						0.72213
27.8722						0.721657
27.9722						0.726004
28.0722						0.723279
28.1722						0.724281
28.2722						0.722017
28.3722						0.717457
28.4722						0.721976
28.5722						0.718481
28.6722						0.721038
28.7722						0.716259
28.8722						0.719683
28.9722						0.714461
29.0722						0.715369
29.1722						0.712941
29.2722						0.716987
29.3722						0.716248
29.4722						0.715114
29.5722						0.715948
29.6722						0.719052
29.7722						0.710805
29.8722						0.713571
29.9722						0.713902
30.0722						0.714367
0.143333							0.02119
0.243333							0.040466
0.343333							0.073525
0.443333							0.11663
0.543333							0.172073
0.643333							0.235219
0.743333							0.30108
0.843333							0.364091
0.943333							0.428254
1.04333							0.492616
1.14333							0.545725
1.24333							0.599239
1.34333							0.641897
1.44333							0.686871
1.54333							0.728707
1.64333							0.765197
1.74333							0.796534
1.84333							0.818242
1.94333							0.853389
2.04333							0.883787
2.14333							0.901302
2.24333							0.926249
2.34333							0.950886
2.44333							0.97319
2.54333							0.987958
2.64333							1.01016
2.74333							1.02528
2.84333							1.04035
2.94333							1.05801
3.04333							1.07541
3.14333							1.09128
3.24333							1.10335
3.34333							1.11599
3.44333							1.12978
3.54333							1.14337
3.64333							1.15989
3.74333							1.17056
3.84333							1.17962
3.94333							1.18737
4.04333							1.20751
4.14333							1.21403
4.24333							1.21844
4.34333							1.23328
4.44333							1.23921
4.54333							1.24429
4.64333							1.25714
4.74333							1.26632
4.84333							1.27418
4.94333							1.27758
5.04333							1.28618
5.14333							1.30209
5.24333							1.29853
5.34333							1.30498
5.44333							1.3129
5.54333							1.31479
5.64333							1.32298
5.74333							1.32676
5.84333							1.32987
5.94333							1.34077
6.04333							1.33823
6.14333							1.34929
6.24333							1.34669
6.34333							1.35469
6.44333							1.35562
6.54333							1.36526
6.64333							1.36432
6.74333							1.36616
6.84333							1.37215
6.94333							1.37267
7.04333							1.38286
7.14333							1.38007
7.24333							1.38638
7.34333							1.38899
7.44333							1.39362
7.54333							1.38993
7.64333							1.39245
7.74333							1.39294
7.84333							1.40354
7.94333							1.39843
8.04333							1.3993
8.14333							1.4034
8.24333							1.41001
8.34333							1.40502
8.44333							1.40899
8.54333							1.41028
8.64333							1.41054
8.74333							1.41782
8.84333							1.41281
8.94333							1.4094
9.04333							1.41868
9.14333							1.41827
9.24333							1.41858
9.34333							1.41801
9.44333							1.42254
9.54333							1.41474
9.64333							1.41774
9.74333							1.42559
9.84333							1.41938
9.94333							1.42478
10.0433							1.42855
10.1433							1.42293
10.2433							1.42216
10.3433							1.42384
10.4433							1.43379
10.5433							1.42004
10.6433							1.42386
10.7433							1.43413
10.8433							1.43188
10.9433							1.42857
11.0433							1.43218
11.1433							1.43227
11.2433							1.4342
11.3433							1.42899
11.4433							1.42929
11.5433							1.42587
11.6433							1.43428
11.7433							1.42876
11.8433							1.42728
11.9433							1.42849
12.0433							1.42441
12.1433							1.42748
12.2433							1.42792
12.3433							1.4274
12.4433							1.42503
12.5433							1.42465
12.6433							1.42067
12.7433							1.43226
12.8433							1.42441
12.9433							1.42311
13.0433							1.43137
13.1433							1.42633
13.2433							1.4249
13.3433							1.42207
13.4433							1.41379
13.5433							1.42359
13.6433							1.42623
13.7433							1.41712
13.8433							1.41848
13.9433							1.41364
14.0433							1.41787
14.1433							1.41979
14.2433							1.41216
14.3433							1.40559
14.4433							1.40765
14.5433							1.4076
14.6433							1.41338
14.7433							1.41154
14.8433							1.40657
14.9433							1.41102
15.0433							1.4067
15.1433							1.39936
15.2433							1.40213
15.3433							1.40709
15.4433							1.40283
15.5433							1.40217
15.6433							1.38982
15.7433							1.39629
15.8433							1.40505
15.9433							1.39887
16.0433							1.39389
16.1433							1.39798
16.2433							1.38869
16.3433							1.39475
16.4433							1.38575
16.5433							1.39348
16.6433							1.38852
16.7433							1.39385
16.8433							1.38492
16.9433							1.38036
17.0433							1.38507
17.1433							1.37582
17.2433							1.3737
17.3433							1.38006
17.4433							1.37811
17.5433							1.37959
17.6433							1.38309
17.7433							1.37888
17.8433							1.37274
17.9433							1.37329
18.0433							1.37042
18.1433							1.37052
18.2433							1.37014
18.3433							1.37216
18.4433							1.36888
18.5433							1.36951
18.6433							1.36806
18.7433							1.3613
18.8433							1.36226
18.9433							1.36401
19.0433							1.35355
19.1433							1.35956
19.2433							1.35222
19.3433							1.35449
19.4433							1.35189
19.5433							1.3528
19.6433							1.35097
19.7433							1.35102
19.8433							1.35239
19.9433							1.34724
[truncated: 101 more rows]
