# Supplementary material for: Towards a molecular mechanism underlying mitochondrial protein import through the TOM and TIM23 complexes
Source: eLife. 2022 Jun 8;11:e75426. doi: 10.7554/eLife.75426 (PMC9255969; doi:10.7554/eLife.75426)
Supplement: Figure 6—source data 3. [file elife-75426-fig6-data3.xlsx]

## Sheet: Sheet1
		technical n=1			technical n=2
	net charge	biological n=1	biological n=2	biological n=3	biological n=1	biological n=2	biological n=3
neutral	1	1	1	1	1	1	1
+8pos	9	0.983612	0.947954	0.875509	0.874603	0.95486	0.929795
+8neg	-7	1.26419	1.23532	1.15183	1.21235	1.1746	1.21907
-8pos	-7	1.34079	1.17863	1.1226	1.22749	1.1799	1.22025
-8neg	9	0.819389	0.768635	0.73841	0.729689	0.836183	0.797134
-17neg	18	0.758637	0.829566	0.651946	0.748938	0.736499	0.71147
-13pos	-12	1.44813	1.39449	1.26762	1.40238	1.30842	1.3792
