# Supplementary material for: Towards a molecular mechanism underlying mitochondrial protein import through the TOM and TIM23 complexes
Source: eLife. 2022 Jun 8;11:e75426. doi: 10.7554/eLife.75426 (PMC9255969; doi:10.7554/eLife.75426)
Supplement: Figure 6—source data 4. [file elife-75426-fig6-data4.xlsx]

## Sheet: primary data n=1-3
Time	+8pos			+8neg			native			-8pos			-8neg			-17neg			-13pos			buffer only
0	1.46378	1.43801	1.33594	1.41908	1.4342	1.36494	1.38716	1.41092	1.34671	1.37784	1.37867	1.36754	1.39818	1.31456	1.33262	1.36372	1.32335	1.31974	1.35962	1.36326	1.31221	1.40921	1.38069	1.37491
0.083333	1.40451	1.40741	1.33042	1.35797	1.36891	1.39118	1.35849	1.37044	1.35259	1.3449	1.35475	1.36458	1.37874	1.29727	1.36349	1.34879	1.33471	1.33618	1.33613	1.37823	1.31945	1.38051	1.35604	1.38148
0.166667	1.41123	1.38914	1.35054	1.33871	1.37957	1.39635	1.3702	1.37178	1.3547	1.35913	1.35127	1.36839	1.3593	1.30658	1.34996	1.34838	1.31549	1.35509	1.34528	1.37823	1.29732	1.37732	1.37101	1.38477
0.25	1.40493	1.4033	1.35922	1.36424	1.38268	1.39376	1.36576	1.38468	1.34881	1.35141	1.34823	1.36416	1.3431	1.28219	1.36729	1.33709	1.32466	1.32344	1.32856	1.37471	1.30966	1.35101	1.36617	1.38929
0.333333	1.3982	1.36904	1.33594	1.36048	1.37335	1.40237	1.3379	1.37934	1.35007	1.34856	1.35693	1.34935	1.34553	1.28308	1.36349	1.33426	1.32335	1.32796	1.32219	1.38835	1.31008	1.35938	1.37409	1.37491
0.416667	1.3961	1.36812	1.36001	1.3341	1.35869	1.41871	1.36132	1.37	1.33871	1.34083	1.35736	1.36712	1.3354	1.272	1.34615	1.32216	1.31986	1.33906	1.33135	1.36987	1.31689	1.34782	1.37189	1.40366
0.5	1.3961	1.35533	1.34817	1.36383	1.39823	1.42216	1.34516	1.37311	1.34671	1.34287	1.35867	1.35485	1.33986	1.28086	1.3656	1.32337	1.31112	1.32262	1.31303	1.36194	1.29562	1.34423	1.36221	1.36629
0.833333	0.99253	0.978927	1.07002	0.986241	0.973605	0.992842	1.0011	0.991024	1.0136	0.994746	0.978989	1.00842	1.00773	0.975833	0.996507	1.00059	0.989128	0.990938	0.994929	0.988663	1.00246	1.00738	0.992496	1.00449
0.916667	0.989587	0.982125	1.07396	0.983729	0.975826	0.98639	0.98535	0.979014	0.983742	0.993526	0.983338	0.983039	0.995173	0.973173	0.984669	0.990105	0.996118	0.976141	0.99254	0.984261	0.986712	1.001	0.984134	0.990938
1	0.984542	0.98989	1.0858	0.980799	0.980712	0.981658	0.990195	0.982128	0.984583	1.00166	0.97464	0.986846	0.988287	0.989134	0.972408	0.979212	1.00136	0.985595	0.977411	0.992625	0.990116	0.981865	0.974891	0.984368
1.08333	0.995472	0.985322	1.09803	0.989171	0.989151	1.00101	0.997464	0.994582	0.987527	0.98824	0.985947	0.988538	0.987477	0.987804	1.01215	0.994543	0.992186	0.995459	0.996521	0.994386	0.989691	0.99223	1.0035	1.01147
1.16667	0.99295	0.993545	1.08856	0.995032	0.994037	1.00876	0.991003	0.993693	0.990051	0.998	0.976814	0.99023	1.01056	0.985144	0.992279	1.00019	0.992623	1.00368	0.99891	0.990864	0.982883	0.99502	1.0145	0.995045
1.25	0.986644	1.01273	1.11144	0.997125	0.999367	0.990691	0.984946	1.00348	0.997621	0.992306	1.00552	0.997843	1.00084	0.989134	0.999466	1.00705	0.998739	0.991349	0.997716	0.986903	1.01054	0.975487	1.00614	0.975744
1.33333	1.00094	0.997199	1.09724	1.00885	1.00869	1.00188	1.00675	0.995917	0.976592	0.988646	0.986382	1.01476	1.00125	0.991351	1.00538	0.993333	1.00398	0.99998	0.999308	0.989104	0.98884	1.01495	0.990736	1.0012
1.41667	1.00556	1.00588	1.1217	0.998799	0.995369	1.00661	0.998272	1.00348	1.01613	1.00451	1.01683	1.00715	1.00692	1.00909	1.00412	1.00019	0.990438	1.00615	1.00926	1.00583	1.00841	1.0022	1.00878	1.00408
1.5	1.0043	1.0004	1.13314	0.995869	0.99759	1.01564	0.993022	0.994137	1.00982	1.01264	1.00204	1.02788	1.01178	1.00421	1.00919	1.00382	0.992186	1.00245	1.00608	1.00847	0.993095	1.0018	1.01538	0.999562
1.58333	1.00682	0.998113	1.09803	0.995032	1.02246	1.0165	1.01281	1.01015	1.01949	1.00369	1.0003	1.00757	1.00246	0.994011	1.01807	0.999385	1.00049	1.01108	1.01046	1.01243	1.0216	1.00379	1.0101	0.993402
1.66667	1.00094	1.02232	1.11894	1.00926	1.00248	1.00575	1.00918	1.01682	1.00225	1.00166	1.01074	1.00588	1.01299	1.01529	1.01553	1.00705	1.00617	1.01642	1.00448	1.01551	1.00203	0.991034	0.998218	1.03611
1.75	1.00556	0.997199	1.11578	1.01638	0.993592	1.01951	1.00958	0.9888	1.02706	1.00939	1.01161	0.997843	1.01421	1.00199	1.00158	1.01149	0.985196	1.00204	1.00608	1.01375	1.00246	0.996615	1.01494	1.00038
1.83333	0.995472	1.01775	1.10868	1.00173	1.00514	1.00919	1.0015	1.00748	1.02033	1.00817	1.00987	1.01603	1.00894	1.00554	1.00116	1.00584	1.00267	1.00984	0.997318	0.991745	1.0182	1.01575	1.00834	1.00983
1.91667	1.00094	1.00542	1.11736	0.997125	0.994481	1.01865	1.01241	1.00971	1.00561	1.01305	0.994646	1.01096	1.00044	1.01219	1.00835	1.00302	0.991312	1.01478	1.00966	1.00231	1.00501	0.994622	1.00878	1.00367
2	1.01313	0.997199	1.09961	0.990846	1.01358	1.02381	1.00231	1.00125	1.00477	1.00288	0.999865	1.01011	1.0053	1.0011	1.01173	1.00503	1.00529	1.01108	1.00886	0.998788	1.00629	1.01017	1.01978	1.01968
2.08333	1.0022	0.994002	1.10434	0.991264	1.00203	1.00532	1.00756	1.00481	0.991313	1.01142	1.00856	1.02322	1.0053	0.998888	0.997352	0.99414	1.0018	1.02094	1.00209	1.01419	1.00118	1.00778	1.01142	0.995456
2.16667	0.99253	0.99994	1.06449	1.01847	1.00914	1.01177	0.992215	1.00882	0.995518	0.997187	1.00943	0.996151	0.996793	1.00953	0.999466	0.981229	1.00442	1.00162	1.00448	0.994826	1.01564	1.01137	0.991176	1.00367
2.25	1.00977	1.01045	1.05936	1.00633	1.01536	1.00575	1.00473	1.01059	0.987948	1.00329	1.00639	1.00207	1.00408	1.00598	1.01088	1.0123	1.0066	0.997103	0.994531	0.993946	1.00714	1.00857	0.988095	1.01024
2.33333	0.999256	1.00451	1.04989	1.00173	1.01092	1.00661	1.01402	1.00748	1.00519	1.00939	1.00073	1.00588	1.00894	1.01884	1.00665	1.00181	1.0018	1.00943	0.984577	0.998788	1.01437	1.0006	1.02507	1.00778
2.41667	1.01523	1.00862	1.0274	1.00131	1.01314	1.00231	1.00312	1.00615	1.00183	1.01427	0.992471	1.00207	1.01097	0.998888	1.00835	1.00745	1.00354	1.00984	1.00648	1.02168	1.00543	1.0022	1.00262	1.00942
2.5	0.998835	1.00222	1.02898	0.99252	1.00336	1.00145	1.00554	1.00481	1.01192	1.00451	0.999865	1.00715	1.00651	0.995784	1.00031	1.00544	0.997429	0.999158	0.997318	0.999668	1.01352	0.997412	0.994257	0.989706
2.58333	0.987485	1.00451	0.994657	0.990427	1.00514	1.01564	0.993426	1.0057	0.99636	1.00979	0.988992	1.00799	0.996388	0.997558	1.00581	1.01109	1.00573	0.999569	0.998512	1.00495	0.990116	1.00578	1.02551	0.99833
2.66667	0.997154	1.00177	1.00649	0.989171	0.985597	1.00962	1.0015	1.0057	0.991733	1.00979	1.00291	1.00969	0.985857	0.997558	1.0075	1.00221	1.00966	1.00286	0.99254	1.01728	1.01479	1.0006	0.997778	0.99217
2.75	0.987065	0.994002	0.974141	1.0055	0.993592	1.01091	1.00796	1.00214	1.00056	0.996373	0.994211	1.00926	1.00125	1.00775	0.989319	0.987281	1.00791	1.00409	1.00886	0.997027	1.02075	1.00897	1.01142	0.992992
2.83333	1.00262	1.00314	0.979665	1.00382	1.00336	1.00231	1.01483	1.00704	1.00898	0.99678	0.99769	1.00334	0.993958	1.01396	1.002	1.01472	0.996118	0.997514	1.00767	1.00011	1.00756	1.00857	0.997778	0.989706
2.91667	1.00136	1.00725	0.97927	0.997543	1.00825	1.00188	1.00393	0.998141	1.01024	0.990273	1.00726	0.994882	1.00084	1.01042	0.991856	0.999788	1.01534	0.990938	0.994929	0.986462	1.00288	1.00419	1.00658	1.00449
3	1.01061	1.00542	0.965066	0.99838	1.00825	0.997144	1.00635	1.00125	1.00645	0.995967	0.99856	0.999958	0.994768	0.994011	1.00623	0.99414	1.00791	1.00409	1.00966	0.999228	0.979479	1.00698	0.999098	1.00203
3.08333	0.990848	0.994458	0.967434	1.0101	1.00025	0.98682	1.01079	0.992803	1.00814	1.00857	1.01465	0.980078	0.978161	0.973173	0.993125	0.989702	1.00267	0.991349	1.00528	1.00847	0.998626	0.997811	0.996897	0.987242
3.16667	1.01019	0.98852	0.965855	1.00424	0.998922	1.00015	1.00918	1.01015	1.00898	1.00451	1.00943	0.996574	0.989502	1.00465	0.997352	0.99535	0.994371	1.00327	0.998114	1.00275	0.9982	1.01137	0.988535	1.01476
3.25	0.998415	1.00999	0.962699	0.992101	0.998034	0.992842	0.996253	1.00348	0.995939	0.998	1.00334	0.999112	1.00975	1.00642	0.98636	0.998174	1.00791	1.01724	1.0017	0.993505	1.00246	1.00259	0.996017	1.01845
3.33333	0.995472	0.996286	0.948101	1.02057	0.988262	0.992412	1.00312	0.996361	1.00687	1.00654	1.00639	1.0118	1.0053	0.988247	0.995238	0.999385	0.990002	0.997925	0.987762	0.988663	0.99352	1.00578	1.00966	1.00531
3.41667	1.00094	0.994002	0.950863	1.00717	0.998922	0.991552	0.99908	0.991024	1.00982	0.996373	0.991601	1.01772	1.00773	0.998888	1.00243	1.00261	0.996992	0.993815	0.992142	1.02036	0.99352	1.00937	0.995137	0.996688
3.5	0.991268	0.98715	0.959543	0.999218	1.01003	0.995853	1.00837	1.01193	0.997621	0.992713	1.019	0.99319	0.991122	0.999331	0.992702	1.00423	1.01054	1.00409	1.00409	0.992185	0.993945	1.00698	1.0079	0.992581
3.58333	0.988746	0.993088	0.950863	0.993776	1.00825	0.993703	0.997061	1.01059	1.01823	1.00166	1.02552	1.00292	1.00368	0.996671	0.989319	0.998981	1.01403	1.00039	0.992938	0.996587	0.989691	1.0006	1.0035	0.999562
3.66667	0.995052	1.01182	0.939026	1.00508	1.00336	0.998865	0.988984	1.0017	1.00603	0.993933	1.0003	1.01011	0.997603	1.00421	1.01384	0.985667	1.00704	0.995048	1.00409	1.00407	0.998626	0.998608	0.990736	0.993402
3.75	0.999256	1.00451	0.945733	0.99545	0.994481	1.00532	0.997464	0.993248	0.999304	1.00247	0.987252	0.997843	1.00489	1.00864	1.00581	1.00382	1.00442	1.00327	0.984179	0.991745	1.00288	0.991432	0.997778	0.992581
3.83333	0.998835	0.993545	0.942182	1.00005	1.00292	1.00489	0.993022	0.989244	0.999724	1.00532	1.00639	0.994459	0.999628	1.00864	0.99693	1.00988	1.01097	1.00861	1.00966	1.00143	0.997775	0.996216	0.989415	1.00613
3.91667	0.990007	0.998113	0.95757	0.996706	1.00292	1.00876	1.00796	1.00481	0.979536	0.995967	1.00073	0.994459	0.996793	1.00377	0.994816	0.979212	1.01796	0.988472	1.00767	1.00275	1.01139	0.998209	1.00614	1.00778
4	0.990848	0.992631	0.953624	1.00047	1.0047	1.00015	0.998676	0.992358	0.988789	0.99312	0.990731	0.99319	1.00206	1.00288	1.00877	1.02077	0.998303	0.999569	1.0017	1.00583	1.00884	0.989439	0.992936	1.00038
4.08333	0.990007	0.991718	0.947706	0.99545	0.994037	0.991552	0.999484	1.00704	0.994677	0.984986	1.00247	1.00673	0.996388	1.00199	1.00877	1.00342	0.993934	0.988061	1.01483	0.995266	1.00203	0.985453	0.986334	0.99833
4.16667	0.986644	0.997199	0.952835	1.01094	0.987818	0.999295	0.986157	1.00615	0.994677	0.997187	0.994211	0.982193	1.0138	0.993124	1.00708	1.00181	0.998303	1.00121	0.999308	0.998347	1.01437	0.999405	1.01582	0.99833
4.25	1.00346	1.00679	0.950468	1.00466	1.00603	0.998434	1.00069	1.01059	1.00099	1.0041	1.00204	0.99023	0.992338	1.0113	0.986783	0.993333	0.997866	1.00162	1.00687	0.997467	0.99352	0.994622	0.989415	1.00038
4.33333	1.00598	1.01273	0.947706	1.0101	0.994481	1.00015	0.993022	1.00125	0.997201	0.997187	0.988557	1.0025	0.989907	1.00864	1.01173	0.992122	1.0018	0.990938	0.983383	1.00847	0.9982	0.997013	0.993376	0.997509
4.41667	1.01019	0.997199	0.947312	0.995869	1.00558	0.985959	0.989792	0.990134	0.985845	0.982953	0.99943	0.990653	1.00125	1.00421	0.995238	1.00261	0.990438	1.02094	1.00687	0.997907	1.01011	0.996216	0.994257	0.998741
4.5	1.00514	1.00085	0.940999	0.99838	1.00292	0.994133	1.00231	1.00437	1.00561	0.991493	1.0103	0.985577	1.00449	0.986917	1.002	1.00503	1.01447	0.996692	0.991744	1.00143	0.982883	1.00698	1.00658	1.00244
4.58333	0.994211	1.0004	0.950468	0.996287	0.998478	0.98682	0.99383	0.995917	0.992574	1.00898	1.00073	0.989384	0.985047	0.998001	0.998621	0.999788	0.986943	1.00039	0.995725	1.01331	0.987989	1.00459	0.990736	1.00162
4.66667	1.0064	0.99857	0.945339	0.99545	0.994925	0.994563	0.991811	0.997696	1.00856	0.998813	0.99595	1.00546	0.998413	1.00155	1.00496	1.00503	0.995244	1.00204	1.01284	0.992625	0.994371	0.997412	0.990295	0.99217
4.75	0.994631	1.01182	0.941788	1.00173	0.990039	0.998004	1.00918	0.996361	1.00225	1.01508	1.00204	1.00503	1.01218	1.00554	1.00581	1.00261	0.976895	0.993404	0.995327	0.991304	1.00203	1.0002	0.996897	1.00162
4.83333	1.00094	1.01045	0.940999	0.999636	0.994925	0.996714	1.0011	0.989244	0.993836	1.01101	0.99508	1.00884	1.00165	0.998445	0.993125	0.993333	0.981701	0.997925	0.998114	0.993065	1.0016	1.0006	1.00658	0.993813
4.91667	1.00262	0.998113	0.944944	0.989171	0.99226	0.982518	1.00069	0.991024	1.0115	0.981733	1.00813	0.997843	0.991932	1.01352	1.00031	0.992929	0.996118	0.998336	0.993734	1.00539	0.98033	0.995419	0.999538	0.993402
5	0.998835	0.999483	0.958359	1.00508	1.00514	1.02037	1.01362	1.00303	0.993836	0.991493	0.988992	0.996151	1.00894	1.00864	0.985937	0.998174	1.00529	0.997925	0.995725	0.990864	0.998626	0.997811	0.981053	1.01106
5.08333	1.00724	1.0004	0.942182	0.991264	1.01625	1.00532	1.00231	0.995917	0.985004	1.00573	1.01422	0.996574	1.00894	0.993124	1.00369	0.986877	1.00311	1.00738	0.98617	1.00539	0.998626	0.990635	0.995137	0.994224
5.16667	0.997574	1.00177	0.937053	1.02643	1.00558	0.993703	0.993022	0.992803	1.00015	1.00491	0.989427	0.996574	0.994768	0.980267	0.997775	1.0127	1.00923	0.98765	0.987364	1.00495	0.997775	1.00658	1.00218	0.995456
5.25	1.0064	0.983038	0.947706	1.00215	0.991372	0.999295	1.00796	0.995917	1.00099	1.00207	1.00117	0.991922	0.993958	0.995784	0.995661	1.00181	1.0018	0.998747	1.01483	0.996587	0.98884	0.995817	0.996017	0.998741
5.33333	1.0001	1.00588	0.94889	1.00843	0.997146	0.990261	0.992618	1.00971	0.991733	0.992713	0.981598	0.983039	0.982617	1.00066	0.981709	0.998578	1.00136	0.980662	1.0005	1.01067	0.979053	0.989439	0.991616	0.988885
5.41667	1.01061	1.00222	0.933502	1.00801	1.00647	0.994993	0.991811	0.991913	0.998462	1.00776	1.00943	0.99742	0.994363	0.994898	0.991856	1.00947	1.00049	1.00573	1.00448	0.990864	0.996924	0.996216	0.997338	1.00778
5.5	1.00052	1.00131	0.947706	1.00424	0.98693	0.994133	1.00393	1.0226	0.988368	0.998813	0.999865	1.00715	0.995173	1.0011	0.991856	0.988895	0.990875	0.989294	0.987364	0.986462	0.996073	0.994223	0.992496	0.996277
5.58333	1.00808	0.995829	0.930741	1.00466	1.00025	0.974345	0.992618	0.991913	0.994257	0.995967	0.99508	0.989807	0.998008	1.00642	0.999044	1.00261	0.996992	0.987239	1.01006	1.01904	1.00288	0.997412	0.991616	1.00285
5.66667	1.01985	1.01502	0.943761	0.991264	1.0007	0.998865	0.995041	0.996806	0.990471	1.0041	1.00595	0.99023	0.990717	1.0011	0.992702	0.999385	0.998739	1.00245	1.00329	0.993505	0.995647	1.00738	1.01538	1.00079
5.75	1.01607	0.994458	0.942577	0.99838	1.00514	0.991552	0.986157	0.991469	0.998042	0.989866	1.01117	0.990653	1.00125	1.01042	1.00158	1.01351	0.993497	0.992993	1.01006	0.996587	1.00714	0.999007	0.989855	0.984778
5.83333	1.00514	0.990804	0.941393	0.995032	1.00825	0.98811	0.991811	0.986131	1.00477	0.981733	1.00421	0.989807	0.997603	1.00465	1.00877	0.995754	1.00354	1.00121	1.0009	0.998347	1.00033	0.99223	1.0013	0.999973
6.25	1.09889	1.15434	1.07593	1.08252	1.13084	1.07156	1.15375	1.08977	1.07879	1.10618	1.08598	1.08583	1.13734	1.14165	1.10939	1.14947	1.05772	1.05999	1.07455	1.07714	1.085	1.04565	1.03299	1.02995
6.33333	1.13462	1.17581	1.10119	1.10764	1.12506	1.07845	1.1485	1.096	1.10571	1.10048	1.08206	1.09175	1.17946	1.1483	1.12588	1.187	1.11277	1.0604	1.08013	1.07538	1.08372	1.03927	1.01626	1.02256
6.41667	1.15059	1.21875	1.15287	1.1135	1.14772	1.10426	1.16263	1.11245	1.1116	1.1135	1.10294	1.10105	1.17865	1.18288	1.15717	1.2112	1.10054	1.08917	1.0865	1.08771	1.10755	1.04365	1.03959	1.03283
6.5	1.17666	1.21921	1.19943	1.12438	1.13573	1.09221	1.1808	1.11201	1.12085	1.12814	1.09989	1.08921	1.21349	1.20904	1.18803	1.17933	1.13068	1.12945	1.09844	1.08991	1.09904	1.0588	1.02463	1.02379
6.58333	1.18675	1.23428	1.20456	1.11768	1.15971	1.11372	1.20019	1.13158	1.12674	1.13464	1.10729	1.11713	1.24062	1.1984	1.20283	1.16763	1.12893	1.13438	1.08331	1.09519	1.09479	1.06399	1.04531	1.05541
6.66667	1.20819	1.24205	1.21205	1.14657	1.16904	1.12749	1.2014	1.15827	1.14525	1.14319	1.10772	1.12263	1.2471	1.22988	1.23158	1.17731	1.15034	1.11588	1.09008	1.07934	1.11095	1.06159	1.04311	1.04679
6.75	1.19137	1.26306	1.22231	1.1562	1.16193	1.12275	1.20342	1.16272	1.15113	1.14115	1.1373	1.13616	1.25277	1.24628	1.24257	1.19829	1.14029	1.11835	1.08451	1.10179	1.10202	1.0608	1.03607	1.04966
6.83333	1.20356	1.26123	1.25979	1.17671	1.17481	1.14728	1.21917	1.17606	1.15324	1.16637	1.14643	1.13574	1.26655	1.25293	1.23876	1.19022	1.15558	1.13972	1.08849	1.10663	1.11138	1.05203	1.03607	1.04843
6.91667	1.20356	1.24022	1.32647	1.21187	1.1757	1.16319	1.23492	1.18718	1.18562	1.16962	1.14556	1.15689	1.25642	1.23697	1.23876	1.17933	1.17044	1.1389	1.10521	1.09959	1.11691	1.07196	1.03079	1.03981
7	1.21281	1.25666	1.37698	1.19261	1.19968	1.17868	1.23371	1.18763	1.17511	1.18914	1.15556	1.17973	1.25723	1.24939	1.26244	1.20152	1.16345	1.13602	1.11039	1.10972	1.12415	1.05721	1.04267	1.04391
7.08333	1.20861	1.26306	1.29925	1.18717	1.20901	1.17308	1.24259	1.18318	1.18057	1.19443	1.17513	1.19581	1.27262	1.25604	1.27808	1.20919	1.16738	1.17548	1.1072	1.10487	1.13053	1.0596	1.04399	1.03242
7.16667	1.20062	1.2795	1.2519	1.20392	1.21834	1.20793	1.24744	1.19163	1.19109	1.19443	1.17861	1.19284	1.28113	1.24141	1.27512	1.20838	1.16651	1.14918	1.10601	1.11764	1.12627	1.05761	1.04443	1.03159
7.25	1.23089	1.26991	1.2523	1.21145	1.20635	1.19545	1.26359	1.19385	1.20455	1.20012	1.16687	1.21357	1.26979	1.24761	1.2692	1.20878	1.16913	1.17137	1.12512	1.11368	1.1267	1.0608	1.03827	1.0435
7.33333	1.21407	1.26854	1.22941	1.22234	1.22411	1.21309	1.26722	1.18674	1.18857	1.21232	1.176	1.20765	1.27141	1.25648	1.27385	1.21726	1.17961	1.17301	1.11915	1.11984	1.12074	1.04724	1.03783	1.02831
7.41667	1.21071	1.27219	1.23415	1.21606	1.225	1.20965	1.27368	1.20231	1.20034	1.20419	1.17209	1.20976	1.28639	1.26978	1.2692	1.21201	1.18835	1.16397	1.1072	1.12204	1.13521	1.05801	1.05852	1.04802
7.5	1.2229	1.2891	1.24914	1.24159	1.233	1.19976	1.28661	1.19741	1.21674	1.20907	1.18601	1.17846	1.27586	1.2782	1.27216	1.20273	1.19097	1.17507	1.11795	1.13701	1.11734	1.05402	1.05059	1.04802
7.58333	1.23677	1.27357	1.24283	1.22862	1.22811	1.20965	1.2648	1.20497	1.22516	1.20744	1.19688	1.2178	1.27627	1.25116	1.28231	1.21726	1.17743	1.17589	1.11118	1.12864	1.14329	1.0588	1.03783	1.03488
7.66667	1.23425	1.28042	1.22981	1.21438	1.24543	1.21868	1.27732	1.21521	1.22221	1.21354	1.18905	1.21146	1.28194	1.26801	1.28316	1.22896	1.18442	1.1948	1.13427	1.1172	1.15436	1.04884	1.0616	1.04474
7.75	1.22626	1.28635	1.24283	1.22401	1.23655	1.22686	1.26763	1.21432	1.21548	1.19931	1.20471	1.2013	1.28315	1.25825	1.2933	1.22371	1.1866	1.18206	1.12432	1.12336	1.14329	1.05083	1.04575	1.05459
7.83333	1.23173	1.27996	1.24362	1.23782	1.23344	1.23417	1.27813	1.19919	1.22474	1.20663	1.1921	1.21442	1.28923	1.25958	1.29034	1.21362	1.19272	1.16685	1.12193	1.11808	1.13819	1.06359	1.05103	1.05213
7.91667	1.2414	1.26945	1.23652	1.2328	1.24899	1.22772	1.27853	1.22677	1.23483	1.2355	1.20427	1.21315	1.2949	1.26889	1.2802	1.22533	1.20583	1.19767	1.12472	1.1216	1.14202	1.04884	1.05896	1.0435
8	1.21281	1.27037	1.25585	1.23782	1.25298	1.22643	1.29428	1.22321	1.23651	1.22859	1.19253	1.2178	1.30827	1.272	1.28316	1.21806	1.18966	1.17795	1.12313	1.13657	1.13819	1.05681	1.04091	1.05418
8.08333	1.24434	1.27037	1.24007	1.24662	1.25698	1.2346	1.29549	1.20809	1.24156	1.21354	1.18383	1.21568	1.28396	1.25825	1.27216	1.23057	1.19884	1.18617	1.12313	1.13173	1.14882	1.04206	1.04531	1.04884
8.16667	1.2414	1.28316	1.2452	1.25373	1.2441	1.22256	1.29953	1.22232	1.24156	1.2107	1.20123	1.21695	1.28882	1.25559	1.28696	1.23864	1.19447	1.17836	1.11556	1.126	1.16116	1.05641	1.05191	1.04432
8.25	1.2456	1.28635	1.25506	1.24368	1.25698	1.22428	1.29065	1.23255	1.22179	1.23347	1.20645	1.20892	1.28639	1.27776	1.29584	1.22048	1.21325	1.19398	1.14104	1.13084	1.14414	1.05043	1.04223	1.03652
8.33333	1.23425	1.28224	1.24046	1.23322	1.25032	1.20922	1.30074	1.22143	1.23609	1.22086	1.1921	1.21865	1.27951	1.2884	1.29415	1.22896	1.20189	1.19726	1.13865	1.12908	1.13351	1.05402	1.04135	1.05993
8.41667	1.23635	1.269	1.25427	1.25834	1.26764	1.23546	1.29549	1.20809	1.24577	1.23347	1.21036	1.20469	1.27667	1.26047	1.28611	1.22573	1.21063	1.21494	1.12153	1.10619	1.16584	1.0612	1.04663	1.04515
8.5	1.22542	1.28133	1.24756	1.23741	1.23611	1.21696	1.30438	1.23033	1.26385	1.21842	1.21863	1.22964	1.32649	1.27687	1.29922	1.24388	1.21675	1.21863	1.13666	1.12248	1.12797	1.04764	1.04575	1.05213
8.58333	1.24981	1.27631	1.26887	1.25248	1.25209	1.21653	1.3072	1.2281	1.25838	1.21761	1.17209	1.22288	1.29611	1.27953	1.28316	1.23904	1.2102	1.20713	1.13706	1.12776	1.13946	1.06678	1.05235	1.05459
8.66667	1.24308	1.29595	1.26334	1.25164	1.24987	1.2303	1.29791	1.233	1.24114	1.24201	1.2108	1.24445	1.31718	1.27111	1.30472	1.23219	1.2102	1.20261	1.13666	1.13217	1.13138	1.05561	1.05191	1.04474
8.75	1.23803	1.29275	1.25703	1.24117	1.25298	1.23847	1.30397	1.25257	1.26469	1.23144	1.20558	1.20807	1.28761	1.28352	1.3026	1.24873	1.21194	1.2063	1.13507	1.13877	1.14499	1.05522	1.03915	1.04474
8.83333	1.25149	1.28361	1.2523	1.25457	1.25254	1.23847	1.31043	1.23878	1.24619	1.22859	1.2034	1.2123	1.30746	1.28086	1.31021	1.23057	1.22287	1.20959	1.13029	1.12908	1.13648	1.05282	1.06468	1.0472
8.91667	1.2414	1.28864	1.25861	1.25289	1.23655	1.24966	1.29953	1.24768	1.27058	1.22249	1.21384	1.22457	1.3034	1.2884	1.28273	1.23259	1.20932	1.21411	1.14343	1.13569	1.15308	1.04246	1.05015	1.04186
9	1.25695	1.28224	1.26295	1.23992	1.26498	1.23761	1.29872	1.23789	1.24661	1.22859	1.19731	1.22203	1.31475	1.27022	1.29795	1.24066	1.21456	1.21494	1.13865	1.126	1.14031	1.04326	1.02683	1.05131
9.08333	1.24224	1.27631	1.26334	1.23866	1.25654	1.24751	1.30357	1.22899	1.27647	1.22249	1.20427	1.22118	1.3034	1.26934	1.28823	1.23945	1.22855	1.21822	1.13985	1.13965	1.1484	1.04645	1.04223	1.04145
9.16667	1.24518	1.29777	1.25388	1.25792	1.24632	1.24535	1.32538	1.24456	1.26932	1.23022	1.20384	1.21822	1.31232	1.29106	1.3026	1.24227	1.23029	1.2211	1.13985	1.14053	1.13861	1.04246	1.03519	1.03693
9.25	1.24266	1.29047	1.25309	1.25666	1.26098	1.24363	1.3177	1.25168	1.26974	1.23835	1.19992	1.22837	1.30421	1.27909	1.31064	1.23057	1.24034	1.2359	1.14025	1.13481	1.16287	1.05043	1.05411	1.04063
9.33333	1.2477	1.28544	1.25703	1.24913	1.26142	1.23116	1.30518	1.24679	1.26049	1.2294	1.20993	1.21146	1.30381	1.28885	1.29964	1.25478	1.22898	1.2137	1.1299	1.14845	1.14202	1.06239	1.04399	1.03406
9.41667	1.25821	1.29641	1.26019	1.26043	1.26764	1.22901	1.31003	1.25212	1.27899	1.23672	1.19384	1.22626	1.29328	1.26224	1.30387	1.25074	1.23248	1.2211	1.1287	1.15197	1.14585	1.06279	1.03607	1.04515
9.5	1.23089	1.28727	1.26295	1.25038	1.25209	1.226	1.32457	1.24723	1.26217	1.23713	1.21254	1.23726	1.32082	1.28441	1.30007	1.2342	1.23379	1.22603	1.13268	1.13525	1.14457	1.04126	1.06336	1.04022
9.58333	1.24981	1.30371	1.2594	1.25206	1.26942	1.22643	1.32376	1.26013	1.27394	1.22615	1.20253	1.23557	1.30421	1.27377	1.31486	1.2459	1.2268	1.22275	1.13149	1.14229	1.14499	1.07435	1.04267	1.04268
9.66667	1.25653	1.29686	1.26926	1.24368	1.25698	1.24665	1.30922	1.26235	1.26175	1.22574	1.21602	1.2326	1.31596	1.26978	1.30176	1.24873	1.24908	1.22809	1.13666	1.13261	1.15861	1.05043	1.05059	1.05459
9.75	1.24476	1.31148	1.25309	1.23531	1.26586	1.2303	1.32659	1.25657	1.27773	1.21395	1.2108	1.21019	1.31758	1.27732	1.2895	1.23622	1.24253	1.22809	1.14502	1.13437	1.1752	1.04724	1.04399	1.03324
9.83333	1.24981	1.27265	1.26571	1.24703	1.26498	1.24277	1.31649	1.25168	1.27731	1.22656	1.19819	1.21188	1.30543	1.2915	1.30852	1.23783	1.23728	1.23179	1.14303	1.15814	1.16031	1.0604	1.04443	1.05336
9.91667	1.2435	1.30737	1.26768	1.24034	1.2592	1.23245	1.32053	1.25613	1.25754	1.2351	1.20949	1.22372	1.32568	1.27466	1.30176	1.25155	1.2434	1.22932	1.12711	1.12952	1.13904	1.04964	1.04707	1.04268
10	1.26158	1.30463	1.27163	1.25834	1.2672	1.23589	1.32336	1.26413	1.27605	1.23957	1.20297	1.21611	1.32487	1.26934	1.30599	1.24994	1.23685	1.24083	1.15339	1.15505	1.14457	1.05402	1.04531	1.02749
10.0833	1.26998	1.29732	1.26966	1.25499	1.26409	1.24277	1.3274	1.24278	1.27016	1.24282	1.20732	1.22372	1.30462	1.29283	1.30091	1.23703	1.23466	1.23919	1.14303	1.14317	1.14755	1.06518	1.04267	1.04556
10.1667	1.26326	1.29777	1.2811	1.26378	1.25165	1.22083	1.3278	1.25968	1.27815	1.23266	1.21428	1.22499	1.29976	1.30037	1.29203	1.25478	1.2635	1.23343	1.13905	1.14273	1.13223	1.05482	1.05191	1.04761
10.25	1.2662	1.32244	1.27202	1.26964	1.27253	1.24492	1.32336	1.25835	1.29792	1.22859	1.21645	1.22626	1.31029	1.2884	1.31656	1.2451	1.24515	1.23713	1.12273	1.1238	1.14329	1.05362	1.04399	1.03036
10.3333	1.25527	1.27219	1.26847	1.25206	1.27652	1.22083	1.32255	1.2588	1.2853	1.23835	1.21036	1.20173	1.31191	1.29727	1.30726	1.23945	1.23248	1.23302	1.14463	1.15197	1.14797	1.05362	1.03783	1.03775
10.4167	1.25107	1.30463	1.27281	1.26043	1.27697	1.22514	1.33628	1.27125	1.28824	1.23266	1.22428	1.22415	1.32933	1.29239	1.30895	1.2568	1.23248	1.24412	1.14224	1.14229	1.14797	1.05362	1.03871	1.03693
10.5	1.27293	1.30417	1.27597	1.25876	1.27208	1.24449	1.33063	1.2588	1.27605	1.22452	1.22515	1.21315	1.32082	1.2986	1.30134	1.23824	1.23291	1.23549	1.1283	1.13877	1.14542	1.07674	1.05631	1.04966
10.5833	1.26956	1.30371	1.27124	1.25248	1.27875	1.23116	1.32134	1.26369	1.29329	1.23998	1.20166	1.21399	1.32042	1.31944	1.31613	1.2459	1.24296	1.23384	1.12751	1.13789	1.15308	1.04964	1.0594	1.02995
10.6667	1.25275	1.32062	1.27755	1.25708	1.2552	1.23675	1.30882	1.27837	1.27226	1.23754	1.2108	1.22372	1.32042	1.29283	1.33051	1.24913	1.24515	1.23466	1.14184	1.13833	1.15053	1.05402	1.06644	1.02995
10.75	1.25359	1.30965	1.26216	1.25206	1.28185	1.22557	1.32659	1.26814	1.25754	1.22412	1.21123	1.22372	1.30989	1.30126	1.3229	1.2459	1.24646	1.23754	1.13268	1.15373	1.15606	1.06518	1.04619	1.06527
10.8333	1.24392	1.30965	1.2736	1.25834	1.27119	1.24449	1.32497	1.25613	1.28572	1.229	1.21776	1.21357	1.3273	1.30348	1.31148	1.23783	1.25214	1.24083	1.12353	1.14713	1.16031	1.05681	1.04443	1.03981
10.9167	1.24602	1.29777	1.24796	1.25666	1.2672	1.23503	1.32497	1.25524	1.26301	1.22168	1.21515	1.2326	1.33135	1.29638	1.31698	1.24953	1.2517	1.23014	1.14821	1.14405	1.16372	1.04405	1.03695	1.03899
11	1.25485	1.30143	1.26334	1.26587	1.26142	1.2488	1.32376	1.24723	1.27521	1.24038	1.21558	1.2178	1.33419	1.29505	1.3136	1.2572	1.26306	1.25933	1.1283	1.13701	1.15819	1.06558	1.03387	1.04638
11.0833	1.2662	1.31513	1.26098	1.26755	1.25343	1.23417	1.31972	1.24412	1.27142	1.22818	1.22863	1.21399	1.32001	1.30747	1.31106	1.2568	1.22461	1.25686	1.11994	1.12556	1.14457	1.07236	1.05808	1.03899
11.1667	1.29016	1.30554	1.27992	1.25206	1.26053	1.23933	1.31286	1.25346	1.27605	1.21964	1.21254	1.2178	1.30746	1.28973	1.31571	1.26608	1.24821	1.24535	1.14582	1.13437	1.14542	1.06199	1.04047	1.03406
11.25	1.25401	1.31285	1.26966	1.26671	1.2783	1.25224	1.33668	1.24634	1.27521	1.23998	1.22558	1.2068	1.30584	1.3252	1.29922	1.25478	1.25869	1.25809	1.14741	1.14185	1.14925	1.04924	1.05147	1.03899
11.3333	1.26452	1.32016	1.26847	1.24285	1.26897	1.22944	1.34395	1.27259	1.30086	1.22574	1.23124	1.21399	1.31677	1.30348	1.33135	1.26123	1.24733	1.24987	1.13706	1.15109	1.15861	1.05761	1.04487	1.04597
11.4167	1.25317	1.30783	1.27992	1.25289	1.26409	1.23288	1.33547	1.27525	1.28067	1.23957	1.21123	1.2178	1.32082	1.30481	1.30303	1.27172	1.26743	1.24001	1.13467	1.14361	1.15053	1.06638	1.05147	1.04761
11.5	1.28512	1.31696	1.25072	1.24536	1.26009	1.23761	1.34355	1.28415	1.29077	1.2233	1.20819	1.23049	1.3107	1.3119	1.32374	1.2338	1.26219	1.25645	1.15378	1.13217	1.14755	1.05801	1.02815	1.0279
11.5833	1.25947	1.32244	1.27281	1.2575	1.25476	1.24191	1.34355	1.27926	1.28782	1.22005	1.21167	1.22457	1.30584	1.30392	1.32417	1.25881	1.25825	1.24083	1.15339	1.15109	1.16201	1.0604	1.04883	1.04761
11.6667	1.25863	1.2996	1.27715	1.25708	1.26409	1.23331	1.3282	1.2717	1.29203	1.24445	1.21428	1.19538	1.32852	1.2884	1.31994	1.24711	1.2552	1.2396	1.13467	1.15153	1.14585	1.06678	1.04223	1.03324
11.75	1.27545	1.31468	1.26413	1.25122	1.27341	1.24105	1.33466	1.27303	1.29161	1.23062	1.21471	1.21865	1.32568	1.29727	1.31951	1.26245	1.2635	1.24165	1.13507	1.14801	1.13946	1.04964	1.04179	1.04843
11.8333	1.26242	1.30645	1.27873	1.26336	1.2672	1.24191	1.32134	1.27659	1.29539	1.23794	1.22471	1.22245	1.33216	1.28397	1.31571	1.2576	1.25651	1.22973	1.13308	1.15681	1.13776	1.07036	1.04223	1.05623
11.9167	1.25023	1.29823	1.25348	1.25164	1.26498	1.24062	1.33143	1.28593	1.29203	1.23876	1.21689	1.22668	1.303	1.315	1.32248	1.2459	1.2635	1.24494	1.13109	1.14185	1.14925	1.04844	1.04267	1.03488
12	1.26242	1.29915	1.26019	1.26462	1.25698	1.24751	1.32861	1.26992	1.27773	1.25014	1.2295	1.19792	1.3188	1.30392	1.31825	1.26446	1.27224	1.24617	1.13109	1.14493	1.16457	1.06518	1.05764	1.05007
12.0833	1.25779	1.30234	1.27518	1.26838	1.25787	1.2432	1.33022	1.2628	1.28488	1.24567	1.20906	1.2085	1.32406	1.3119	1.3267	1.2455	1.28097	1.24658	1.14781	1.13833	1.14202	1.05163	1.04267	1.04515
12.1667	1.27587	1.30645	1.26216	1.25792	1.26942	1.23417	1.34234	1.28815	1.27857	1.22249	1.20862	1.21188	1.31799	1.30658	1.31825	1.24711	1.25476	1.25193	1.15856	1.13525	1.15308	1.04924	1.03827	1.02379
12.25	1.26578	1.3165	1.26611	1.26085	1.26675	1.24191	1.33466	1.27481	1.27689	1.23184	1.22036	1.22118	1.32366	1.30924	1.30176	1.25438	1.26481	1.23919	1.13069	1.15593	1.13478	1.05402	1.03387	1.03652
12.3333	1.26326	1.30189	1.27439	1.26922	1.26409	1.21868	1.33668	1.28415	1.26553	1.23632	1.22341	1.2343	1.3111	1.29727	1.31233	1.26002	1.26568	1.24535	1.13627	1.14361	1.15776	1.05442	1.05235	1.03981
12.4167	1.27755	1.2891	1.27202	1.25248	1.27297	1.24449	1.33466	1.29038	1.29287	1.23428	1.21819	1.21822	1.31637	1.29328	1.3267	1.25397	1.26262	1.24823	1.14064	1.14449	1.14287	1.05282	1.04971	1.03406
12.5	1.26284	1.31239	1.27558	1.2575	1.27075	1.24535	1.3492	1.28548	1.28993	1.22696	1.21515	1.22288	1.32001	1.30791	1.31317	1.26971	1.28097	1.23179	1.13826	1.1304	1.14244	1.05601	1.04663	1.05706
12.5833	1.25905	1.30006	1.27755	1.26043	1.28319	1.24665	1.34557	1.27837	1.29371	1.24079	1.22515	1.21907	1.3192	1.32121	1.30852	1.23097	1.2635	1.24083	1.13985	1.14317	1.15308	1.05163	1.04267	1.0394
12.6667	1.25611	1.30874	1.25466	1.26336	1.26409	1.23331	1.34718	1.28015	1.29203	1.2355	1.21819	1.21568	1.32406	1.30215	1.32036	1.23743	1.25694	1.2359	1.15179	1.14317	1.14627	1.05043	1.04003	1.0279
12.75	1.26704	1.30508	1.26571	1.25708	1.25831	1.24148	1.33911	1.27259	1.28236	1.2233	1.2034	1.21188	1.30624	1.31678	1.33262	1.25397	1.2517	1.24453	1.13905	1.14581	1.17265	1.05402	1.05147	1.02831
12.8333	1.25779	1.29686	1.27124	1.25834	1.26053	1.23761	1.33143	1.27436	1.28866	1.24282	1.22515	1.22837	1.32123	1.30436	1.31825	1.24146	1.26175	1.23466	1.13786	1.13393	1.15095	1.05362	1.05852	1.05213
12.9167	1.2662	1.30783	1.25664	1.2621	1.26231	1.23933	1.33628	1.28504	1.29203	1.2294	1.21471	1.22034	1.30543	1.32609	1.3229	1.24913	1.26306	1.22603	1.14423	1.15814	1.13904	1.05322	1.05103	1.04227
13	1.27545	1.31148	1.27992	1.24494	1.2592	1.24406	1.34759	1.27881	1.27226	1.22249	1.21254	1.22245	1.32487	1.315	1.32628	1.24388	1.25651	1.23836	1.12114	1.14713	1.15521	1.06319	1.04971	1.04884
13.0833	1.26998	1.31742	1.27005	1.26378	1.27253	1.23976	1.33668	1.28415	1.29876	1.21802	1.20688	1.21315	1.32204	1.30126	1.31317	1.25397	1.26175	1.25439	1.14104	1.14757	1.14499	1.06478	1.06292	1.05213
13.1667	1.26242	1.31148	1.27439	1.25917	1.27253	1.23116	1.34234	1.27214	1.29539	1.24486	1.20384	1.21865	1.33054	1.31101	1.31275	1.25962	1.26874	1.25028	1.13905	1.13965	1.14414	1.05522	1.05631	1.04679
13.25	1.26158	1.29732	1.28031	1.26462	1.27075	1.24665	1.34072	1.27659	1.2832	1.2355	1.22254	1.21865	1.32852	1.3017	1.34615	1.24671	1.29452	1.24576	1.14343	1.15197	1.14372	1.05123	1.04223	1.05213
13.3333	1.2662	1.30052	1.26611	1.24745	1.26098	1.22901	1.34678	1.27792	1.29203	1.2477	1.21384	1.21272	1.32447	1.31323	1.32924	1.26204	1.27704	1.22768	1.13746	1.15593	1.14116	1.06478	1.05499	1.03118
13.4167	1.26158	1.30554	1.26768	1.25038	1.26453	1.23804	1.35889	1.26413	1.28109	1.22737	1.23037	1.22161	1.32082	1.29328	1.31233	1.2459	1.26044	1.23097	1.13826	1.1282	1.13691	1.0588	1.04355	1.04227
13.5	1.25947	1.31559	1.27794	1.25541	1.27741	1.23804	1.35405	1.28771	1.30381	1.229	1.21689	1.21738	1.33095	1.30037	1.31867	1.23985	1.25257	1.23836	1.13746	1.13921	1.13308	1.05522	1.04311	1.04227
13.5833	1.25779	1.29184	1.28031	1.26922	1.27297	1.23718	1.33507	1.28148	1.27436	1.24038	1.2221	1.22922	1.31799	1.30658	1.33431	1.26809	1.25563	1.23179	1.14144	1.15285	1.16584	1.05522	1.05764	1.05747
13.6667	1.25863	1.31148	1.26966	1.26796	1.26631	1.24105	1.34395	1.2797	1.28782	1.23672	1.21341	1.22753	1.32204	1.32254	1.32839	1.25034	1.27092	1.25398	1.13746	1.13569	1.14542	1.06598	1.06776	1.04309
13.75	1.26578	1.29641	1.27281	1.25959	1.25209	1.22557	1.35688	1.27303	1.29876	1.22696	1.21297	1.21315	1.32649	1.29372	1.31402	1.26083	1.26044	1.2396	1.13627	1.12952	1.14968	1.06319	1.05455	1.0435
13.8333	1.27377	1.30326	1.27124	1.25708	1.26498	1.22514	1.33224	1.29571	1.27436	1.2412	1.22385	1.2178	1.31799	1.31722	1.30599	1.26245	1.26088	1.25604	1.14423	1.14141	1.1467	1.06159	1.04575	1.06116
13.9167	1.27377	1.29777	1.2807	1.26252	1.28274	1.23632	1.34234	1.26324	1.30296	1.22859	1.20949	1.21272	1.32568	1.31988	1.33093	1.24832	1.25607	1.24124	1.1283	1.14009	1.14797	1.0592	1.06248	1.03365
14	1.27124	1.31285	1.26295	1.2621	1.2823	1.23288	1.3379	1.29883	1.29161	1.22371	1.21732	1.20003	1.31839	1.3017	1.30937	1.24631	1.25214	1.25809	1.13905	1.14449	1.15861	1.03887	1.05631	1.05213
14.0833	1.27461	1.28818	1.28583	1.24745	1.26942	1.23933	1.33749	1.28237	1.27436	1.2416	1.22863	1.20976	1.33054	1.30702	1.32543	1.25639	1.26787	1.23056	1.12751	1.14625	1.14159	1.07475	1.04223	1.04309
14.1667	1.27209	1.31833	1.27597	1.26462	1.28718	1.24363	1.34557	1.28815	1.28572	1.22737	1.21515	1.22541	1.33297	1.32254	1.31486	1.24106	1.25913	1.21987	1.14662	1.14009	1.1467	1.05761	1.05279	1.04761
14.25	1.24938	1.32107	1.25822	1.27508	1.27875	1.23804	1.34839	1.28015	1.2832	1.24811	1.21993	1.21315	1.3273	1.30303	1.33093	1.24469	1.2683	1.24165	1.13228	1.13965	1.14499	1.06319	1.04883	1.04597
14.3333	1.26494	1.32062	1.27873	1.26378	1.28185	1.23976	1.35243	1.29482	1.3017	1.24608	1.21776	1.21865	1.33864	1.31146	1.33135	1.2576	1.26612	1.25768	1.14582	1.14317	1.14244	1.07515	1.03871	1.03118
14.4167	1.25779	1.29549	1.26492	1.25917	1.29118	1.22643	1.34355	1.29482	1.30507	1.23754	1.21167	1.21526	1.32852	1.29461	1.32966	1.24832	1.25651	1.24823	1.13348	1.13877	1.15861	1.05482	1.05103	1.0509
14.5	1.26704	1.31194	1.2811	1.25792	1.28496	1.25052	1.34718	1.28193	1.28824	1.24079	1.22602	1.21907	1.32244	1.31279	1.32121	1.23219	1.27005	1.24124	1.13189	1.13833	1.17095	1.05003	1.03827	1.05377
14.5833	1.25065	1.30097	1.27558	1.24829	1.26631	1.23202	1.33184	1.28504	1.29665	1.23632	1.22558	1.20596	1.3188	1.32298	1.31825	1.25801	1.26568	1.23508	1.12711	1.13965	1.13393	1.06997	1.07128	1.0472
14.6667	1.2704	1.31148	1.27558	1.26922	1.27608	1.23804	1.34799	1.28104	1.27983	1.24404	1.20297	1.23049	1.33338	1.32077	1.33896	1.24873	1.26874	1.23919	1.13149	1.14009	1.14074	1.07953	1.05631	1.0435
14.75	1.26956	1.29412	1.26768	1.25164	1.26498	1.24449	1.35122	1.27659	1.2832	1.23632	1.21906	1.22415	1.31353	1.29771	1.30726	1.24066	1.24821	1.24412	1.13189	1.15549	1.14287	1.04365	1.06248	1.06527
14.8333	1.25527	1.3028	1.28583	1.25834	1.2672	1.24277	1.35647	1.27392	1.28194	1.24648	1.21471	1.22034	1.32366	1.31367	1.34192	1.24873	1.27005	1.23631	1.14701	1.15021	1.15989	1.07395	1.04267	1.0628
14.9167	1.27124	1.30645	1.27439	1.26838	1.27164	1.23933	1.32982	1.27525	1.27436	1.23103	1.23254	1.23134	1.33662	1.31855	1.33008	1.25034	1.26437	1.26056	1.14861	1.13965	1.16074	1.06837	1.0638	1.05295
15	1.25359	1.31376	1.2594	1.26796	1.27031	1.23503	1.32578	1.28771	1.28109	1.22696	1.21384	1.22541	1.32366	1.29949	1.33093	1.24066	1.27136	1.23261	1.14303	1.13965	1.15776	1.08232	1.04575	1.06363
15.0833	1.27293	1.31605	1.27202	1.25834	1.28185	1.25955	1.35809	1.28326	1.29539	1.24038	1.21776	1.24952	1.32892	1.3119	1.31909	1.26043	1.27224	1.23672	1.13348	1.14889	1.15563	1.04565	1.04003	1.06363
15.1667	1.27419	1.32427	1.25822	1.24829	1.27786	1.2432	1.35405	1.29927	1.27899	1.23916	1.2195	1.22372	1.32163	1.30747	1.31233	1.26486	1.25869	1.2433	1.13587	1.13745	1.15776	1.07236	1.05676	1.05665
15.25	1.26662	1.30737	1.28189	1.26713	1.28408	1.24148	1.35364	1.28771	1.29329	1.23347	1.21341	1.21442	1.32973	1.31944	1.336	1.25074	1.26175	1.23549	1.13507	1.14009	1.14074	1.05801	1.05455	1.05623
15.3333	1.27209	1.28955	1.29373	1.27048	1.2672	1.23073	1.36657	1.27703	1.28782	1.24201	1.21906	1.21949	1.32447	1.33318	1.32966	1.24469	1.27442	1.22932	1.14542	1.12776	1.13691	1.05561	1.05808	1.05459
15.4167	1.25695	1.29869	1.27045	1.27885	1.27475	1.23116	1.35203	1.28548	1.30086	1.23062	1.21732	1.20892	1.33378	1.33229	1.31317	1.2576	1.26612	1.23466	1.13467	1.13437	1.1518	1.06279	1.04399	1.04145
15.5	1.26704	1.30189	1.26571	1.26252	1.26409	1.23331	1.34759	1.29616	1.30423	1.24567	1.23298	1.21822	1.32244	1.31323	1.30683	1.2568	1.2718	1.25439	1.13905	1.13481	1.16329	1.06159	1.05059	1.04761
15.5833	1.28007	1.31696	1.26768	1.26964	1.27519	1.24191	1.35324	1.29527	1.29161	1.24364	1.22471	1.22541	1.30948	1.30924	1.3267	1.26567	1.26743	1.22932	1.15179	1.13525	1.14797	1.06997	1.04575	1.04022
15.6667	1.26452	1.30554	1.26532	1.25541	1.27475	1.24751	1.34759	1.28548	1.29455	1.2477	1.21776	1.21188	1.33216	1.30968	1.30429	1.24348	1.27224	1.24617	1.14502	1.14185	1.13478	1.05641	1.05411	1.06691
15.75	1.26452	1.31513	1.27518	1.25708	1.28585	1.22643	1.36132	1.27659	1.28362	1.24323	1.21384	1.21907	1.33257	1.30791	1.31444	1.24146	1.27267	1.2322	1.13945	1.14273	1.14372	1.06957	1.04751	1.04063
15.8333	1.25863	1.3028	1.26611	1.26043	1.28674	1.22987	1.36495	1.30728	1.27731	1.23957	1.22167	1.2178	1.30705	1.31722	1.32586	1.24832	1.27704	1.22357	1.14901	1.13349	1.16712	1.0592	1.04135	1.055
15.9167	1.27797	1.30143	1.2594	1.26252	1.25654	1.24707	1.35041	1.28771	1.30296	1.23388	1.22689	1.22837	1.32933	1.32077	1.31825	1.2568	1.26787	1.25193	1.14741	1.13877	1.14797	1.06	1.05852	1.04966
16	1.25989	1.32336	1.27755	1.24578	1.26853	1.22815	1.33628	1.29749	1.3118	1.22534	1.21689	1.21526	1.33095	1.31279	1.32755	1.24106	1.28534	1.24412	1.13427	1.13173	1.15648	1.06837	1.03827	1.04761
16.0833	1.25947	1.31513	1.25664	1.26838	1.28807	1.24062	1.34759	1.29171	1.29203	1.22534	1.20732	1.21146	1.32325	1.31633	1.3174	1.25236	1.26524	1.247	1.14383	1.14405	1.13904	1.05681	1.04179	1.06239
16.1667	1.27881	1.30554	1.27439	1.25708	1.25432	1.22858	1.3488	1.28949	1.29035	1.22818	1.23167	1.203	1.32892	1.32077	1.32205	1.24631	1.2884	1.2359	1.12631	1.13789	1.13946	1.06877	1.0572	1.06363
16.25	1.26073	1.29732	1.28228	1.25876	1.26231	1.23804	1.34274	1.29705	1.30717	1.23428	1.22036	1.2085	1.3107	1.31279	1.31148	1.26365	1.26743	1.23754	1.13706	1.14317	1.15308	1.0588	1.05587	1.04063
16.3333	1.26704	1.29503	1.27597	1.26378	1.26453	1.24148	1.34638	1.27881	1.28656	1.24648	1.2221	1.20934	1.3435	1.31633	1.31571	1.25357	1.27267	1.22521	1.12114	1.14229	1.1701	1.06957	1.05984	1.05788
16.4167	1.26746	1.31559	1.27439	1.25499	1.28185	1.24751	1.33386	1.28815	1.29876	1.23388	1.20471	1.22203	1.33176	1.32564	1.32248	1.25962	1.27311	1.24371	1.13547	1.12116	1.14457	1.06638	1.05411	1.04268
16.5	1.27629	1.31559	1.26492	1.27676	1.27963	1.2346	1.35284	1.2797	1.29708	1.229	1.21863	1.21103	1.33216	1.31456	1.32713	1.25881	1.28403	1.23261	1.1279	1.12248	1.16287	1.06478	1.04091	1.05952
16.5833	1.28428	1.31605	1.29057	1.2575	1.26586	1.24148	1.35445	1.28993	1.29371	1.22818	1.23472	1.23937	1.32973	1.31811	1.31444	1.24873	1.27267	1.25152	1.14542	1.14009	1.14627	1.06359	1.05676	1.05418
16.6667	1.26536	1.30417	1.26729	1.25499	1.27919	1.25009	1.35203	1.29394	1.30423	1.22981	1.20732	1.20934	1.33216	1.3221	1.33558	1.26002	1.27355	1.24576	1.1502	1.12688	1.14712	1.06399	1.03827	1.0509
16.75	1.25821	1.31331	1.28781	1.26043	1.28319	1.2389	1.35405	1.28059	1.29665	1.22981	1.21732	1.21695	1.34958	1.31944	1.33008	1.26123	1.27005	1.24124	1.13308	1.13877	1.15393	1.06997	1.05367	1.06609
16.8333	1.2704	1.3165	1.26413	1.25499	1.27119	1.22987	1.35566	1.29082	1.27773	1.23428	1.23254	1.21865	1.33014	1.30791	1.31402	1.24671	1.27573	1.24864	1.14224	1.14669	1.1518	1.05841	1.05984	1.06075
16.9167	1.26998	1.30874	1.24796	1.25582	1.25698	1.24794	1.35243	1.27525	1.29665	1.22005	1.22385	1.20807	1.31313	1.32387	1.33685	1.26002	1.26874	1.24371	1.13905	1.1238	1.14585	1.06717	1.04355	1.07307
17	1.26284	1.30874	1.27558	1.26168	1.27208	1.24751	1.34274	1.28771	1.29624	1.2473	1.20471	1.2343	1.33419	1.31456	1.34657	1.25922	1.26612	1.2359	1.13228	1.13393	1.15691	1.06319	1.05279	1.04022
17.0833	1.25443	1.30097	1.25072	1.25248	1.27208	1.23546	1.36172	1.31529	1.30717	1.22656	1.22428	1.22372	1.32082	1.32298	1.33305	1.23904	1.26743	1.23138	1.14662	1.12644	1.15733	1.05681	1.04927	1.055
17.1667	1.26914	1.29503	1.27124	1.25624	1.28452	1.23503	1.34436	1.30372	1.29834	1.23469	1.22385	1.20976	1.33014	1.31057	1.32374	1.25478	1.2766	1.23919	1.14064	1.14449	1.14627	1.07435	1.06424	1.05706
17.25	1.27545	1.30874	1.27558	1.25038	1.2823	1.25912	1.35889	1.29394	1.3017	1.24648	1.23124	1.21272	1.33297	1.32653	1.34023	1.25236	1.27267	1.24741	1.13945	1.1172	1.14116	1.06757	1.04883	1.05172
17.3333	1.26788	1.30965	1.28426	1.26545	1.27697	1.24665	1.35405	1.2886	1.29834	1.24486	1.23211	1.22034	1.32528	1.33451	1.3229	1.26608	1.28272	1.22645	1.13149	1.13965	1.16329	1.05322	1.05411	1.04391
17.4167	1.25779	1.28681	1.26729	1.25122	1.28541	1.24966	1.36778	1.30639	1.2895	1.24079	1.22385	1.2381	1.335	1.30924	1.32966	1.25276	1.27704	1.23097	1.14383	1.12512	1.15521	1.07475	1.05279	1.05993
17.5	1.27419	1.3229	1.27202	1.26085	1.26675	1.22212	1.34476	1.29216	1.29539	1.24892	1.22036	1.21188	1.33297	1.32121	1.3322	1.24994	1.28578	1.24987	1.14184	1.13921	1.14372	1.07674	1.05543	1.04925
17.5833	1.27713	1.29275	1.28031	1.27885	1.27519	1.23632	1.35809	1.27614	1.28993	1.25096	1.22297	1.21357	1.31272	1.32875	1.32713	1.24752	1.27398	1.24247	1.14701	1.12864	1.14372	1.06917	1.06688	1.05788
17.6667	1.27251	1.30371	1.2886	1.25917	1.27164	1.24837	1.35082	1.28949	1.3139	1.21598	1.21471	1.2123	1.33014	1.32476	1.34065	1.24227	1.28359	1.23425	1.14741	1.14757	1.16584	1.05442	1.04487	1.04104
17.75	1.25149	1.30554	1.27597	1.26629	1.27519	1.2432	1.3597	1.30061	1.29455	1.22818	1.21515	1.20638	1.33095	1.32121	1.34446	1.2685	1.2801	1.23836	1.1295	1.13833	1.14968	1.07395	1.05499	1.05048
17.8333	1.27251	1.32153	1.27005	1.24536	1.28674	1.22858	1.34314	1.28415	1.30885	1.23266	1.20036	1.2453	1.32568	1.31279	1.33008	1.26245	1.2801	1.2433	1.12353	1.14449	1.15223	1.07754	1.04443	1.0587
17.9167	1.25989	1.31513	1.25743	1.27089	1.26808	1.2346	1.36899	1.29927	1.29371	1.24567	1.21819	1.22922	1.32568	1.32165	1.33093	1.24671	1.27442	1.23919	1.14184	1.15241	1.13734	1.07634	1.03739	1.0435
18	1.27167	1.32564	1.27794	1.26922	1.28141	1.24148	1.35566	1.30728	1.2975	1.23266	1.21645	1.21695	1.34107	1.31367	1.31021	1.24913	1.28228	1.23919	1.14264	1.14801	1.15053	1.05641	1.06204	1.05213
18.0833	1.26746	1.32153	1.26887	1.25415	1.2783	1.24105	1.36172	1.29571	1.29539	1.2473	1.22863	1.21865	1.3435	1.31234	1.3267	1.25115	1.27835	1.23425	1.14303	1.14361	1.1535	1.07196	1.06468	1.06322
18.1667	1.27167	1.2996	1.26098	1.26545	1.26586	1.23374	1.34718	1.29838	1.30843	1.23876	1.23037	1.21146	1.33662	1.3119	1.34108	1.2572	1.27704	1.22439	1.12591	1.14845	1.1718	1.05561	1.04355	1.04679
18.25	1.2683	1.28133	1.27202	1.24703	1.26631	1.25998	1.36253	1.29127	1.29077	1.22981	1.22993	1.23599	1.33783	1.30436	1.32882	1.24752	1.27617	1.24617	1.13507	1.15329	1.15478	1.06438	1.06116	1.04925
18.3333	1.27335	1.3165	1.274	1.2688	1.26586	1.23589	1.3597	1.29349	1.30044	1.23347	1.21993	1.23726	1.34188	1.32121	1.32121	1.25155	1.28665	1.23466	1.13308	1.14185	1.14755	1.07076	1.05852	1.06691
18.4167	1.26032	1.31696	1.26058	1.25499	1.28008	1.24148	1.35041	1.3055	1.29245	1.23672	1.22558	1.21907	1.32811	1.29638	1.3174	1.2576	1.27442	1.22233	1.13627	1.13745	1.16074	1.04565	1.04223	1.0628
18.5	1.28806	1.30691	1.27518	1.28136	1.27875	1.24019	1.34961	1.30817	1.30591	1.23428	1.2108	1.21653	1.32892	1.33008	1.33008	1.25801	1.28578	1.22932	1.14662	1.1282	1.14542	1.07316	1.05808	1.05582
18.5833	1.27083	1.30371	1.27479	1.2575	1.27741	1.24019	1.35041	1.29527	1.29918	1.23957	1.25429	1.22711	1.34391	1.32121	1.34319	1.2455	1.26044	1.24905	1.151	1.14317	1.13606	1.06917	1.0638	1.04884
18.6667	1.25779	1.31057	1.26374	1.25917	1.2743	1.25095	1.35566	1.28726	1.31222	1.24648	1.23167	1.23641	1.34958	1.32077	1.33178	1.25397	1.29757	1.24371	1.13786	1.13569	1.13819	1.06598	1.05367	1.05295
18.75	1.26914	1.3092	1.25585	1.25708	1.27652	1.22729	1.36051	1.29794	1.30296	1.22778	1.2308	1.22711	1.34634	1.31057	1.32543	1.25962	1.2884	1.22809	1.14104	1.1216	1.16244	1.07196	1.05852	1.04802
18.8333	1.2641	1.30828	1.27439	1.25959	1.2783	1.21911	1.36414	1.28548	1.30086	1.2477	1.2195	1.22288	1.32163	1.33141	1.32966	1.26446	1.26524	1.23836	1.16533	1.12864	1.15265	1.04166	1.06028	1.05254
18.9167	1.25569	1.3092	1.26532	1.26336	1.27164	1.24277	1.34597	1.30861	1.29371	1.23469	1.22124	1.23472	1.33378	1.32032	1.32755	1.25518	1.26961	1.22932	1.14861	1.126	1.1518	1.07953	1.05499	1.04638
19	1.262	1.30463	1.28465	1.23657	1.28008	1.23245	1.36172	1.28548	1.29581	1.24282	1.23646	1.23303	1.3273	1.29949	1.33178	1.25438	1.28097	1.23179	1.1506	1.13789	1.15265	1.06917	1.0682	1.06198
19.0833	1.25737	1.29092	1.26847	1.25834	1.26853	1.22858	1.3597	1.29082	1.3017	1.22859	1.22297	1.23091	1.32204	1.31456	1.33093	1.25397	1.27617	1.23466	1.14701	1.14933	1.15691	1.06797	1.06512	1.04761
19.1667	1.27881	1.29138	1.26808	1.25164	1.27697	1.24492	1.36132	1.30906	1.29455	1.24201	1.2195	1.22245	1.32042	1.31323	1.32036	1.24994	1.28578	1.22439	1.14861	1.13393	1.13946	1.07116	1.05191	1.05541
19.25	1.27083	1.30783	1.27321	1.25876	1.26098	1.22901	1.35324	1.3055	1.3017	1.23794	1.23298	1.2178	1.33743	1.32343	1.31486	1.26002	1.26874	1.23713	1.13228	1.15241	1.15095	1.07076	1.04795	1.05418
19.3333	1.25695	1.30326	1.26611	1.26043	1.26098	1.22686	1.37061	1.29705	1.31011	1.23347	1.22689	1.22795	1.32852	1.31988	1.33008	1.26406	1.27442	1.24658	1.14343	1.13789	1.13989	1.07355	1.05015	1.06198
19.4167	1.25401	1.30554	1.27794	1.26043	1.26764	1.22987	1.35688	1.31618	1.2996	1.23754	1.21906	1.23387	1.34067	1.32875	1.33431	1.23138	1.27136	1.24617	1.15896	1.13657	1.16201	1.06997	1.0616	1.06322
19.5	1.26242	1.30417	1.29175	1.2575	1.24543	1.24234	1.35809	1.31084	1.30507	1.2595	1.22689	1.21146	1.3273	1.32742	1.33516	1.26729	1.29539	1.22357	1.14303	1.12996	1.17648	1.09109	1.04927	1.05582
19.5833	1.26073	1.32336	1.26374	1.26127	1.26675	1.22901	1.35284	1.30239	1.30254	1.24282	1.22385	1.23218	1.32568	1.31323	1.33474	1.25559	1.28054	1.23343	1.13666	1.14141	1.15478	1.06717	1.04047	1.05747
19.6667	1.27124	1.30965	1.25111	1.25624	1.28274	1.23718	1.35647	1.31618	1.30044	1.24648	1.24777	1.22541	1.33176	1.30436	1.34996	1.25599	1.27879	1.24001	1.13109	1.13525	1.15053	1.07475	1.06204	1.0435
19.75	1.2704	1.30326	1.28031	1.25666	1.28408	1.23331	1.36939	1.3095	1.32147	1.24201	1.22689	1.21526	1.33864	1.31589	1.3174	1.2568	1.27617	1.22069	1.13746	1.15241	1.1501	1.0608	1.03607	1.055
19.8333	1.25527	1.30052	1.26137	1.26671	1.27253	1.24191	1.36293	1.28726	1.32399	1.25136	1.22558	1.22203	1.32568	1.30968	1.33051	1.27213	1.30238	1.23508	1.13427	1.13877	1.14755	1.06797	1.06336	1.0702
19.9167	1.24686	1.30783	1.26295	1.26001	1.27564	1.23116	1.3601	1.31217	1.31937	1.24323	1.23341	1.22584	1.32933	1.32786	1.34488	1.25074	1.27311	1.23672	1.13189	1.13173	1.14712	1.06877	1.04883	1.06239
20	1.262	1.31513	1.26611	1.25457	1.26897	1.25654	1.3698	1.30639	1.30549	1.24079	1.20993	1.21526	1.33864	1.33096	1.31994	1.23904	1.27573	1.23302	1.14343	1.1282	1.14968	1.06757	1.06116	1.05582
20.0833	1.26242	1.29732	1.26768	1.28345	1.27697	1.24578	1.3698	1.3055	1.31264	1.25909	1.21732	1.22245	1.3354	1.32742	1.33896	1.26123	1.27529	1.23425	1.13666	1.12116	1.14585	1.08751	1.06776	1.05706
20.1667	1.26914	1.31011	1.27834	1.26796	1.28141	1.22169	1.35849	1.29349	1.32105	1.2351	1.22689	1.22161	1.32973	1.31545	1.31529	1.25317	1.2849	1.22932	1.13905	1.13833	1.16882	1.07116	1.04927	1.05254
20.25	1.25821	1.29595	1.26453	1.25038	1.2823	1.22987	1.36414	1.31217	1.3139	1.24201	1.20427	1.22837	1.34472	1.32343	1.34827	1.24025	1.28054	1.23754	1.14423	1.12996	1.15563	1.07395	1.04531	1.05665
20.3333	1.2704	1.3028	1.27755	1.25834	1.27741	1.24234	1.35082	1.30772	1.31768	1.23306	1.21819	1.24572	1.32973	1.31279	1.35461	1.23783	1.28753	1.24905	1.14264	1.13569	1.15861	1.06837	1.06556	1.05829
20.4167	1.26284	1.30645	1.259	1.25876	1.26631	1.25439	1.35405	1.29972	1.2975	1.24567	1.22341	1.22795	1.34148	1.33939	1.32586	1.24752	1.28403	1.22809	1.13467	1.12336	1.15393	1.07515	1.0616	1.05213
20.5	1.25443	1.29641	1.25979	1.24954	1.26586	1.24707	1.3702	1.29527	1.31811	1.23428	1.22254	1.21907	1.33338	1.32121	1.32797	1.2451	1.2766	1.24001	1.13308	1.14493	1.15095	1.07834	1.06424	1.05829
20.5833	1.25275	1.30052	1.27321	1.26755	1.2743	1.24148	1.36253	1.28815	1.30465	1.25014	1.2395	1.23345	1.34674	1.31678	1.31148	1.24711	1.27311	1.24987	1.1291	1.1304	1.14882	1.06678	1.04663	1.07348
20.6667	1.26872	1.30371	1.28268	1.24871	1.2863	1.25396	1.36374	1.31173	1.3118	1.26194	1.22645	1.23472	1.3269	1.31633	1.33051	1.26285	1.27748	1.23343	1.13348	1.13437	1.16031	1.06837	1.0616	1.055
20.75	1.25779	1.30645	1.28662	1.25457	1.27341	1.25783	1.35405	1.30417	1.31811	1.23957	1.21819	1.23049	1.3273	1.34338	1.33896	1.26446	1.29233	1.23466	1.13826	1.13569	1.15563	1.08232	1.06028	1.06363
20.8333	1.26578	1.29641	1.30201	1.26671	1.26764	1.22686	1.37545	1.28815	1.31558	1.23103	1.20688	1.23683	1.34188	1.31811	1.3415	1.25034	1.28753	1.2511	1.14184	1.14449	1.16287	1.07754	1.06688	1.05459
20.9167	1.26116	1.31605	1.30911	1.26462	1.26586	1.23632	1.37182	1.31351	1.31516	1.23632	1.21558	1.22499	1.34512	1.31545	1.32417	1.25438	1.27748	1.24823	1.13388	1.1238	1.14712	1.07316	1.06204	1.06691
21	1.27755	1.29595	1.34659	1.25917	1.2823	1.24707	1.36818	1.29705	1.30254	1.23184	1.21036	1.23726	1.32811	1.32431	1.32459	1.26365	1.29146	1.2322	1.15816	1.12072	1.14287	1.07116	1.05896	1.0702
21.0833	1.2704	1.30965	1.38171	1.25834	1.28363	1.25009	1.36737	1.29616	1.30591	1.24404	1.22471	1.22499	1.33945	1.32697	1.34277	1.25357	1.27923	1.23425	1.14184	1.14097	1.14031	1.07953	1.05808	1.05829
21.1667	1.25989	1.28727	1.45549	1.27006	1.27386	1.22643	1.35647	1.31573	1.30128	1.25177	1.23428	1.23514	1.35201	1.3221	1.30852	1.25397	1.27835	1.23672	1.14582	1.14097	1.1667	1.0879	1.04575	1.05952
21.25	1.25653	1.29549	1.49139	1.2642	1.26276	1.23546	1.35647	1.29127	1.30759	1.25543	1.22819	1.21738	1.33864	1.31234	1.33643	1.25881	1.27529	1.23097	1.13228	1.13128	1.14925	1.06518	1.05323	1.04556
21.3333	1.26746	1.31285	1.52572	1.27089	1.26942	1.22944	1.36657	1.28771	1.3118	1.23591	1.22167	1.22161	1.32244	1.33008	1.3322	1.26123	1.26	1.24001	1.13388	1.1304	1.15819	1.06797	1.04927	1.0665
21.4167	1.27083	1.29641	1.54663	1.24996	1.28185	1.24148	1.3597	1.31039	1.31306	1.23672	1.22341	1.23937	1.34269	1.2955	1.3229	1.2576	1.28403	1.25398	1.14463	1.13657	1.14968	1.0608	1.04971	1.05295
21.5	1.26494	1.31011	1.56675	1.25499	1.28985	1.24191	1.36414	1.32552	1.30254	1.25177	1.22254	1.22457	1.32406	1.3354	1.32966	1.25195	1.27791	1.2433	1.13507	1.14273	1.15265	1.07116	1.05323	1.04802
21.5833	1.25779	1.29092	1.56873	1.27508	1.2632	1.24019	1.35728	1.31573	1.32105	1.24974	1.21776	1.21907	1.35484	1.31633	1.32839	1.25115	1.26612	1.23713	1.14064	1.13305	1.1535	1.07156	1.06732	1.06691
21.6667	1.2456	1.31833	1.58332	1.25499	1.28585	1.25439	1.34597	1.30061	1.30759	1.23876	1.22297	1.21357	1.32852	1.33052	1.33558	1.25518	1.2849	1.23343	1.1502	1.14581	1.15521	1.07276	1.06512	1.05706
21.75	1.26073	1.30052	1.56873	1.25541	1.27741	1.25267	1.36697	1.30328	1.30843	1.26031	1.22036	1.22457	1.31718	1.32077	1.32713	1.25034	1.26699	1.2359	1.14542	1.13128	1.15989	1.07515	1.0572	1.055
21.8333	1.26662	1.30691	1.59477	1.26462	1.2672	1.24019	1.37182	1.30906	1.30759	1.25014	1.24907	1.22837	1.34715	1.32653	1.32628	1.26164	1.28447	1.24001	1.13905	1.14053	1.14882	1.08472	1.05367	1.06609
21.9167	1.25191	1.30645	1.5849	1.24578	1.2672	1.24019	1.37303	1.32062	1.29581	1.24404	1.24602	1.23557	1.32649	1.34205	1.33558	1.24348	1.28534	1.24576	1.13388	1.12512	1.15989	1.07714	1.06468	1.06896
22	1.26158	1.28955	1.59634	1.26503	1.27875	1.24234	1.37787	1.30283	1.31726	1.24974	1.22732	1.22964	1.35282	1.30702	1.33431	1.24953	1.27224	1.25069	1.14144	1.13965	1.1484	1.07475	1.06292	1.04843
22.0833	1.26998	1.30326	1.58569	1.27927	1.28852	1.23761	1.36293	1.30016	1.30969	1.23713	1.23646	1.23472	1.32892	1.33318	1.32839	1.24792	1.27748	1.23384	1.15936	1.14273	1.15265	1.07953	1.06072	1.05665
22.1667	1.25989	1.30326	1.56557	1.26545	1.28585	1.23245	1.38514	1.31217	1.31222	1.24852	1.23211	1.21865	1.34269	1.33008	1.32543	1.24873	1.29015	1.23384	1.14064	1.13349	1.1501	1.07196	1.07656	1.05747
22.25	1.25905	1.29641	1.57662	1.26378	1.27386	1.23331	1.37505	1.31884	1.31306	1.22615	1.22515	1.21061	1.33176	1.30924	1.33727	1.27293	1.28228	1.22398	1.13945	1.13525	1.15989	1.09149	1.06116	1.05007
22.3333	1.25653	1.31239	1.5636	1.26964	1.28541	1.24363	1.3593	1.30906	1.30843	1.24933	1.22732	1.22076	1.33945	1.30968	1.32839	1.24227	1.25913	1.23056	1.14343	1.1238	1.15393	1.06	1.06732	1.05829
22.4167	1.25569	1.32107	1.56517	1.27424	1.28008	1.22557	1.3807	1.31662	1.316	1.25096	1.22167	1.23218	1.33945	1.32032	1.34869	1.25438	1.28097	1.24165	1.14741	1.13173	1.14202	1.06717	1.04047	1.06034
22.5	1.26998	1.30737	1.54624	1.26587	1.25965	1.23847	1.36859	1.31217	1.31516	1.24282	1.21819	1.21822	1.32568	1.32298	1.31529	1.23783	1.27879	1.23877	1.14502	1.13789	1.14712	1.07236	1.04355	1.06239
22.5833	1.27461	1.30234	1.54466	1.27341	1.27475	1.23976	1.37141	1.31484	1.30927	1.23794	1.23341	1.23176	1.33216	1.31101	1.35292	1.25922	1.27835	1.23425	1.1287	1.14669	1.16031	1.06319	1.05147	1.06445
22.6667	1.26662	1.27128	1.51862	1.24368	1.28674	1.24665	1.36939	1.31306	1.31138	1.23754	1.21732	1.22415	1.34593	1.31146	1.33008	1.25639	1.27136	1.24001	1.13746	1.13393	1.13989	1.07634	1.06556	1.06938
22.75	1.25695	1.29366	1.51625	1.25038	1.26187	1.24148	1.37464	1.31795	1.32189	1.25136	1.22515	1.2326	1.3512	1.32609	1.33896	1.25962	1.2801	1.24001	1.15299	1.14493	1.15053	1.06638	1.05852	1.05788
22.8333	1.26032	1.32062	1.46654	1.26629	1.28674	1.23417	1.35607	1.32062	1.31432	1.2538	1.22385	1.23049	1.32933	1.33584	1.31782	1.27778	1.27486	1.23425	1.12631	1.14317	1.14457	1.08432	1.05808	1.0628
22.9167	1.25821	1.29503	1.45589	1.26964	1.26897	1.2488	1.37464	1.32863	1.30507	1.24079	1.20775	1.25079	1.34512	1.32742	1.32459	1.26043	1.28927	1.22932	1.13826	1.15373	1.1535	1.0879	1.06028	1.05747
23	1.26578	1.30645	1.42866	1.25666	1.27919	1.24923	1.37343	1.30328	1.31306	1.24445	1.23646	1.22034	1.32609	1.32387	1.33262	1.24711	1.28272	1.23343	1.1291	1.13965	1.14329	1.06997	1.05896	1.05007
23.0833	1.26116	1.31833	1.38802	1.26629	1.26276	1.25525	1.38434	1.30995	1.30801	1.24567	1.21906	1.21695	1.32487	1.32875	1.33558	1.25438	1.27224	1.22932	1.13547	1.13084	1.17563	1.07874	1.06732	1.07184
23.1667	1.27124	1.29823	1.36593	1.25959	1.26808	1.23589	1.35203	1.31262	1.31474	1.24445	1.21689	1.20765	1.34715	1.32121	1.33262	1.28141	1.29233	1.22233	1.1502	1.13921	1.15223	1.07316	1.06336	1.06527
23.25	1.25569	1.30783	1.3462	1.27173	1.25787	1.23632	1.36576	1.30639	1.3118	1.25055	1.22124	1.21611	1.33419	1.31811	1.33854	1.25397	1.28272	1.23795	1.16294	1.12556	1.15606	1.07276	1.05587	1.06445
23.3333	1.26578	1.30234	1.35251	1.24662	1.27075	1.25267	1.37262	1.30639	1.31306	1.24852	1.23254	1.23303	1.35484	1.30614	1.34319	1.25962	1.27398	1.21987	1.15219	1.13437	1.16159	1.07435	1.06292	1.06322
23.4167	1.26326	1.3028	1.33318	1.25624	1.28718	1.25009	1.36859	1.29216	1.31811	1.24974	1.2221	1.2178	1.34188	1.33052	1.34404	1.25478	1.26437	1.21617	1.14184	1.13084	1.15053	1.07834	1.05059	1.06486
23.5	1.25989	1.29915	1.36751	1.26294	1.28097	1.24148	1.37666	1.31751	1.32736	1.24974	1.23385	1.22964	1.3354	1.31678	1.33981	1.24873	1.28665	1.23138	1.1291	1.14713	1.16925	1.0903	1.06644	1.07471
23.5833	1.25737	1.30326	1.37264	1.27006	1.26098	1.24449	1.35405	1.3015	1.31096	1.22818	1.23602	1.2436	1.33054	1.3017	1.33051	1.24792	1.26874	1.21822	1.13905	1.15153	1.15223	1.07555	1.05631	1.05623
23.6667	1.25065	1.29047	1.36672	1.25206	1.27786	1.23589	1.36859	1.29438	1.32483	1.2412	1.22515	1.22584	1.34877	1.32609	1.34446	1.26567	1.28141	1.21905	1.13905	1.14537	1.15648	1.07594	1.0682	1.06979
23.75	1.26578	1.31194	1.36593	1.25666	1.27075	1.24535	1.3698	1.30016	1.31222	1.2656	1.25342	1.23007	1.34148	1.31412	1.32501	1.25841	1.2919	1.22439	1.13905	1.14185	1.15308	1.06997	1.05499	1.05623
23.8333	1.27797	1.29686	1.37382	1.26796	1.28141	1.25052	1.37868	1.29438	1.32988	1.25014	1.23646	1.2398	1.35647	1.31811	1.33474	1.2568	1.28622	1.23466	1.1506	1.13261	1.15563	1.07435	1.04795	1.05418
23.9167	1.26368	1.29595	1.3679	1.25792	1.27208	1.24492	1.36213	1.31529	1.31306	1.25258	1.22254	1.25418	1.34229	1.31146	1.34573	1.26002	1.2766	1.23631	1.13826	1.15373	1.15989	1.07156	1.066	1.05254
24	1.2704	1.30965	1.37342	1.24285	1.29207	1.22901	1.34516	1.30417	1.31558	1.26031	1.21297	1.21865	1.34836	1.32564	1.33431	1.26164	1.26961	1.2322	1.13985	1.13965	1.18499	1.06399	1.05367	1.06814
24.0833	1.25317	1.30097	1.37816	1.26043	1.27608	1.24191	1.3698	1.32107	1.30086	1.26031	1.23472	1.21992	1.35079	1.32387	1.33178	1.24913	1.27092	1.23343	1.15259	1.15021	1.15138	1.07116	1.05764	1.04966
24.1667	1.26116	1.30874	1.3821	1.25917	1.27875	1.24019	1.37787	1.31262	1.31811	1.24852	1.2395	1.22203	1.33095	1.31589	1.3453	1.24429	1.26699	1.24042	1.14064	1.16034	1.14627	1.07594	1.066	1.0587
24.25	1.25443	1.30417	1.38921	1.26001	1.27075	1.23933	1.36859	1.30861	1.31853	1.23998	1.21602	1.23134	1.33743	1.33229	1.33685	1.25397	1.2849	1.24905	1.14662	1.14317	1.1701	1.06957	1.06204	1.07061
24.3333	1.25695	1.31011	1.42038	1.25834	1.27741	1.23718	1.38111	1.31884	1.30969	1.2355	1.22689	1.22118	1.34026	1.32032	1.32078	1.26002	1.27355	1.22891	1.13865	1.14801	1.16201	1.08511	1.04751	1.0628
24.4167	1.26452	1.31468	1.41998	1.26127	1.27564	1.23374	1.37949	1.31529	1.3446	1.25299	1.2395	1.22161	1.35808	1.33451	1.32713	1.23864	1.25782	1.24042	1.14343	1.15197	1.15989	1.06478	1.07304	1.05665
24.5	1.2641	1.30006	1.43931	1.25457	1.26986	1.25654	1.36132	1.31751	1.31895	1.24079	1.23733	1.2326	1.35241	1.3456	1.3415	1.25155	1.28709	1.24289	1.14582	1.14669	1.14797	1.07395	1.06028	1.07595
24.5833	1.2641	1.30874	1.42906	1.2575	1.27031	1.24277	1.38474	1.31662	1.31348	1.24201	1.22385	1.23683	1.33297	1.31944	1.35038	1.26285	1.27704	1.22357	1.14343	1.14845	1.14372	1.08113	1.05764	1.07471
24.6667	1.24224	1.29275	1.41722	1.24996	1.26187	1.21997	1.37787	1.31351	1.32063	1.2473	1.2295	1.23472	1.32609	1.34249	1.35038	1.23824	1.29146	1.22768	1.13905	1.15461	1.14542	1.08113	1.04399	1.06157
24.75	1.2704	1.29823	1.45628	1.26713	1.27564	1.24234	1.37787	1.30461	1.32778	1.23713	1.23124	1.24487	1.31839	1.32387	1.34319	1.25639	1.29364	1.22357	1.14901	1.12864	1.15861	1.08711	1.04179	1.06814
24.8333	1.25485	1.29732	1.48942	1.26043	1.27253	1.24105	1.37182	1.30728	1.3282	1.25136	1.24081	1.22753	1.32852	1.32875	1.35714	1.24711	1.27748	1.23631	1.13627	1.15417	1.15521	1.07634	1.06072	1.06322
24.9167	1.28049	1.30097	1.49139	1.24996	1.25387	1.24837	1.36495	1.32596	1.32231	1.23428	1.23515	1.23514	1.32933	1.33761	1.31951	1.24792	1.2683	1.23631	1.14861	1.13569	1.16414	1.07834	1.06072	1.08129
25	1.25191	1.31468	1.49573	1.26127	1.26498	1.24191	1.38595	1.31217	1.32694	1.2538	1.24081	1.23007	1.34391	1.32697	1.34911	1.25276	1.2718	1.23795	1.13268	1.14317	1.15053	1.08033	1.05808	1.04104
25.0833	1.27755	1.30326	1.50718	1.2688	1.27786	1.23245	1.37101	1.30995	1.31811	1.23998	1.22515	1.23514	1.34472	1.32919	1.3415	1.26527	1.25563	1.23343	1.14622	1.15549	1.14457	1.06638	1.05059	1.05911
25.1667	1.25359	1.30417	1.44957	1.25666	1.28097	1.26213	1.38716	1.3095	1.32063	1.25584	1.2395	1.22034	1.34107	1.32431	1.34361	1.26083	1.28185	1.22275	1.14383	1.13305	1.15223	1.07953	1.0638	1.05829
25.25	1.25107	1.29641	1.48074	1.24578	1.26542	1.23503	1.37061	1.32018	1.30591	1.25543	1.25037	1.2326	1.33014	1.3252	1.33008	1.25599	1.27486	1.22028	1.14662	1.13613	1.16712	1.06678	1.0594	1.06034
25.3333	1.2704	1.30234	1.45589	1.25457	1.27297	1.23073	1.37949	1.31618	1.32315	1.24567	1.23428	1.22245	1.33216	1.31811	1.32713	1.2576	1.26918	1.23138	1.14423	1.13965	1.16116	1.08272	1.0616	1.06814
25.4167	1.25779	1.31513	1.4476	1.26043	1.27475	1.21825	1.3807	1.33486	1.31054	1.26885	1.24429	1.22288	1.3435	1.33407	1.35799	1.25559	1.27529	1.22891	1.14064	1.13217	1.15521	1.06399	1.05896	1.06445
25.5	1.25443	1.28818	1.43774	1.27676	1.2783	1.24966	1.36657	1.29571	1.3261	1.26072	1.22645	1.23218	1.33176	1.30791	1.32586	1.26729	1.28578	1.23014	1.13627	1.14493	1.1518	1.06319	1.06072	1.05336
25.5833	1.26116	1.29412	1.43853	1.24787	1.28274	1.24837	1.37545	1.32329	1.32315	1.25746	1.23298	1.24318	1.32973	1.32431	1.34996	1.24146	1.28403	1.22932	1.1498	1.14229	1.14755	1.07874	1.0616	1.05418
25.6667	1.25779	1.29275	1.4622	1.27341	1.26853	1.24535	1.36778	1.32507	1.31811	1.23184	1.25037	1.2233	1.35282	1.33407	1.34235	1.2568	1.27355	1.23097	1.1287	1.13569	1.15819	1.07594	1.06204	1.06691
25.75	1.26536	1.31696	1.47167	1.26168	1.27386	1.24148	1.38312	1.31039	1.31264	1.25543	1.23037	1.23683	1.32771	1.33141	1.33389	1.26164	1.28709	1.22932	1.13945	1.14141	1.15478	1.06159	1.06072	1.08786
25.8333	1.27251	1.32016	1.47285	1.24494	1.27919	1.22944	1.36778	1.31529	1.33282	1.2416	1.23863	1.22795	1.32649	1.32653	1.34361	1.2693	1.27355	1.22973	1.14502	1.13613	1.1667	1.06438	1.06204	1.06773
25.9167	1.27377	1.28544	1.49218	1.26922	1.27075	1.24966	1.37505	1.31173	1.30801	1.2599	1.2295	1.24191	1.33014	1.3283	1.34827	1.24913	1.27092	1.23138	1.15378	1.15285	1.15861	1.06997	1.05147	1.04515
26	1.25653	1.30052	1.51546	1.26545	1.27297	1.25525	1.37747	1.29171	1.31516	1.25787	1.23776	1.24826	1.34877	1.32165	1.34235	1.25357	1.27791	1.23056	1.14064	1.14361	1.15861	1.0903	1.06732	1.06486
26.0833	1.26452	1.27996	1.5056	1.25582	1.26364	1.22944	1.37545	1.31751	1.31138	1.24608	1.24037	1.22118	1.3431	1.31811	1.33727	1.26567	1.28054	1.23138	1.151	1.14449	1.15606	1.08113	1.07964	1.05788
26.1667	1.26788	1.30965	1.50441	1.26503	1.28052	1.23288	1.36051	1.32641	1.32021	1.25177	1.2395	1.23176	1.34148	1.32653	1.33854	1.25438	1.27573	1.23508	1.14303	1.14097	1.13393	1.07754	1.06424	1.06732
26.25	1.26746	1.31605	1.52493	1.25624	1.27741	1.24062	1.36293	1.32507	1.33661	1.23916	1.2395	1.23387	1.33945	1.33761	1.33389	1.25317	1.28316	1.22768	1.13627	1.13789	1.15265	1.07594	1.05279	1.06979

## Sheet: secondary data n=1-2
PCP	net charge	rel. TMRM fluorescence
+8pos	9	0.205299	0.256581	0.223709
+8neg	-7	0.199935	0.221307	0.190687
neut	1	0.283686	0.233388	0.241879
-8pos	-7	0.175278	0.168269	0.170293
-8neg	9	0.26375	0.260813	0.273519
-17neg	18	0.191272	0.216834	0.192876
-13pos	-12	0.077949	0.091241	0.101269
