# Supplementary material for: Towards a molecular mechanism underlying mitochondrial protein import through the TOM and TIM23 complexes
Source: eLife. 2022 Jun 8;11:e75426. doi: 10.7554/eLife.75426 (PMC9255969; doi:10.7554/eLife.75426)
Supplement: Figure 6—source data 5. [file elife-75426-fig6-data5.xlsx]

## Sheet: Sheet1
	net charge	technical n=1			technical n=2			-ATP			+val
		biological n=1	biological n=2	biological n=3	biological n=1	biological n=2	biological n=3	biological n=1	biological n=2	biological n=3	biological n=1	biological n=2	biological n=3
neutral	1	1	1	1	1	1	1	1.05771	0.989586	0.900072	0.742524	0.711943	0.846671
+8pos	9	0.983612	0.947954	0.875509	0.874603	0.95486	0.929795	0.929206	0.864469	0.741094	0.777469	0.798471	0.9068
+8neg	-7	1.26419	1.23532	1.15183	1.21235	1.1746	1.21907	1.10268	1.06197	0.956044	0.781657	0.665301	0.819988
-8pos	-7	1.34079	1.17863	1.1226	1.22749	1.1799	1.22025	1.24195	1.12953	1.04573	0.74984	0.681942	0.793572
-8neg	9	0.819389	0.768635	0.73841	0.729689	0.836183	0.797134	0.810211	0.760744	0.72834	0.674639	0.802927	0.877701
-17neg	18	0.758637	0.829566	0.651946	0.748938	0.736499	0.71147	0.774763	0.730906	0.662665	0.680755	0.625021	0.674684
-13pos	-12	1.44813	1.39449	1.26762	1.40238	1.30842	1.3792	1.3743	1.28016	1.18412	0.85441	0.709582	0.83105
