# Supplementary material for: Towards a molecular mechanism underlying mitochondrial protein import through the TOM and TIM23 complexes
Source: eLife. 2022 Jun 8;11:e75426. doi: 10.7554/eLife.75426 (PMC9255969; doi:10.7554/eLife.75426)
Supplement: Figure 7—source data 2. [file elife-75426-fig7-data2.xlsx]

## Sheet: primary data n=1-3
time	F1 α			F1 β			Acp1			Mrp21
0	0	0	0	0.005107	0.008723	0.006483	0.003821	0.008968	0.005754	0.00755	0.007564	0.006335
0.066667	0.001723	0.002335	0.001774	0.009298	0.011184	0.009242	0.012256	0.017282	0.012242	0.017462	0.017383	0.014192
0.133333	0.003202	0.003894	0.003304	0.011869	0.013119	0.01151	0.023954	0.028249	0.021162	0.029657	0.031412	0.024973
0.2	0.0053	0.005818	0.005696	0.014419	0.01686	0.013392	0.034209	0.042676	0.032724	0.045354	0.047023	0.03877
0.266667	0.007665	0.008287	0.008119	0.017624	0.018139	0.017109	0.061055	0.059294	0.045267	0.055712	0.058483	0.053899
0.333333	0.010592	0.01072	0.009468	0.020126	0.020119	0.019794	0.072183	0.080656	0.062693	0.078104	0.076196	0.067275
0.4	0.013641	0.014064	0.011911	0.022383	0.022956	0.021497	0.096879	0.102072	0.085382	0.095935	0.09588	0.087387
0.466667	0.016923	0.016665	0.014663	0.025268	0.026085	0.02378	0.116389	0.118764	0.11003	0.111164	0.113289	0.097616
0.533333	0.020045	0.020185	0.018497	0.028487	0.028738	0.025324	0.139469	0.150161	0.12072	0.134093	0.128977	0.114403
0.6	0.023262	0.024671	0.021198	0.031444	0.03122	0.028125	0.168591	0.181041	0.149572	0.150656	0.150718	0.135273
0.666667	0.027191	0.028462	0.025036	0.034098	0.032868	0.031133	0.197011	0.204593	0.16183	0.171059	0.17802	0.159396
0.733333	0.032463	0.033571	0.029389	0.035524	0.034004	0.032602	0.220833	0.220272	0.190983	0.1927	0.191685	0.176773
0.8	0.037942	0.037869	0.034136	0.039754	0.039355	0.035706	0.256025	0.25244	0.207942	0.21468	0.213773	0.186618
0.866667	0.041911	0.04182	0.038966	0.042148	0.038642	0.037374	0.273465	0.278814	0.239146	0.232912	0.230098	0.210861
0.933333	0.041077	0.051088	0.042814	0.043157	0.040046	0.040844	0.305157	0.305653	0.265674	0.258619	0.260831	0.221827
1	0.045455	0.060479	0.050108	0.047993	0.045739	0.042943	0.332146	0.326462	0.291568	0.275431	0.269353	0.246677
1.06667	0.050157	0.061674	0.053511	0.053827	0.047566	0.047751	0.356113	0.354274	0.309541	0.288159	0.298417	0.26216
1.13333	0.061277	0.066868	0.060208	0.056046	0.052539	0.049	0.363887	0.375014	0.332325	0.311554	0.310318	0.274178
1.2	0.068344	0.073236	0.05874	0.055577	0.05404	0.054181	0.397047	0.394324	0.345301	0.317824	0.323968	0.296388
1.26667	0.067715	0.077858	0.068871	0.064887	0.059371	0.056153	0.40822	0.406966	0.37265	0.337885	0.3455	0.313228
1.33333	0.071991	0.086213	0.07519	0.066101	0.061895	0.055789	0.430093	0.432038	0.384088	0.348304	0.364442	0.318053
1.4	0.083283	0.093501	0.085079	0.073827	0.064967	0.063848	0.448709	0.456392	0.417134	0.369103	0.379078	0.349379
1.46667	0.08734	0.102328	0.09096	0.069916	0.068969	0.061963	0.460447	0.471145	0.421794	0.381242	0.381969	0.344468
1.53333	0.091347	0.10897	0.099606	0.079409	0.069442	0.065316	0.487485	0.479836	0.441402	0.408917	0.39977	0.369972
1.6	0.095093	0.11116	0.103903	0.082116	0.077885	0.070572	0.509942	0.490601	0.460836	0.41275	0.411153	0.38466
1.66667	0.103041	0.124487	0.104504	0.087254	0.079004	0.069887	0.513801	0.506366	0.46908	0.428012	0.430532	0.38732
1.73333	0.112957	0.125243	0.117823	0.09598	0.083181	0.075423	0.534504	0.515802	0.48847	0.43471	0.434992	0.406139
1.8	0.113912	0.131055	0.121404	0.094661	0.087534	0.079735	0.541156	0.533945	0.503102	0.449084	0.449228	0.420128
1.86667	0.122141	0.141157	0.131446	0.104317	0.089951	0.079332	0.550904	0.538582	0.514637	0.459283	0.457032	0.425128
1.93333	0.122445	0.149784	0.136853	0.100204	0.09435	0.086645	0.555332	0.584632	0.52097	0.485625	0.469103	0.426844
2	0.133453	0.149553	0.144405	0.102158	0.09956	0.091441	0.562031	0.580774	0.54281	0.474666	0.483193	0.450368
2.06667	0.132052	0.165457	0.153429	0.110009	0.103297	0.091843	0.588058	0.600729	0.541783	0.49623	0.474745	0.450172
2.13333	0.14929	0.17378	0.161137	0.113214	0.107899	0.099171	0.623531	0.602314	0.549422	0.498543	0.490104	0.460983
2.2	0.152176	0.176188	0.16452	0.120352	0.10995	0.10022	0.610189	0.609915	0.574504	0.498921	0.515409	0.478506
2.26667	0.152058	0.175009	0.178781	0.121772	0.111821	0.104122	0.599748	0.609638	0.578336	0.509308	0.505852	0.471604
2.33333	0.170015	0.185512	0.18167	0.131754	0.123612	0.112664	0.637098	0.626678	0.585379	0.5251	0.519837	0.486215
2.4	0.171019	0.19042	0.186011	0.131994	0.119269	0.11605	0.637485	0.644906	0.602435	0.525994	0.531033	0.494429
2.46667	0.170323	0.19717	0.19359	0.136324	0.128073	0.114222	0.652724	0.652027	0.620662	0.541614	0.539746	0.500704
2.53333	0.178376	0.200632	0.195389	0.14054	0.135604	0.122287	0.648502	0.665588	0.654689	0.542179	0.534835	0.509556
2.6	0.180696	0.208441	0.192565	0.149219	0.138498	0.130139	0.664641	0.662506	0.628054	0.555712	0.542928	0.513574
2.66667	0.191457	0.219103	0.210122	0.149638	0.1403	0.130773	0.668251	0.668717	0.641732	0.562216	0.571187	0.527038
2.73333	0.1963	0.232198	0.211642	0.154967	0.151035	0.135383	0.685878	0.689235	0.63624	0.568777	0.550419	0.535701
2.8	0.199931	0.235635	0.225053	0.162213	0.151799	0.137309	0.687616	0.686268	0.657673	0.588708	0.562693	0.540308
2.86667	0.203676	0.241975	0.221703	0.164556	0.156434	0.143205	0.700942	0.691862	0.654925	0.580122	0.577129	0.539706
2.93333	0.214466	0.240414	0.228773	0.169311	0.16149	0.145584	0.691897	0.701964	0.65045	0.59222	0.587391	0.560886
3	0.213252	0.24184	0.249127	0.172874	0.16851	0.150294	0.714479	0.726749	0.684459	0.603588	0.590972	0.556461
3.06667	0.229525	0.256352	0.246004	0.191314	0.167992	0.1581	0.714073	0.741637	0.692708	0.62562	0.607265	0.580162
3.13333	0.232553	0.252663	0.258582	0.18734	0.178575	0.165471	0.725255	0.713751	0.69162	0.617889	0.596997	0.571951
3.2	0.230223	0.277299	0.273392	0.189044	0.178532	0.168045	0.727775	0.711074	0.703003	0.613786	0.592313	0.578687
3.26667	0.235012	0.27295	0.257973	0.188028	0.182071	0.178121	0.746477	0.764593	0.722031	0.615867	0.615454	0.600763
3.33333	0.241847	0.27883	0.271753	0.199453	0.190557	0.175182	0.743733	0.737	0.696839	0.643558	0.617929	0.597728
3.4	0.246007	0.29464	0.27556	0.20243	0.198779	0.179899	0.766512	0.76813	0.720193	0.632959	0.633307	0.594316
3.46667	0.256462	0.280708	0.287654	0.212113	0.198938	0.188957	0.770535	0.764299	0.721296	0.644286	0.630528	0.620622
3.53333	0.263611	0.292665	0.287088	0.216503	0.208835	0.184079	0.783873	0.762604	0.745707	0.660791	0.629726	0.609461
3.6	0.266185	0.294568	0.28362	0.216556	0.208254	0.191285	0.756695	0.77774	0.748914	0.670107	0.628642	0.606196
3.66667	0.268118	0.302049	0.298943	0.213575	0.214179	0.193208	0.768909	0.779799	0.741363	0.668009	0.645215	0.599123
3.73333	0.269399	0.297594	0.297972	0.228358	0.220442	0.197384	0.80398	0.78404	0.751963	0.659672	0.650361	0.610467
3.8	0.276198	0.314289	0.303698	0.230103	0.225913	0.213785	0.768712	0.793851	0.743829	0.673102	0.644889	0.606663
3.86667	0.282744	0.310021	0.300164	0.232437	0.236263	0.215108	0.801419	0.797425	0.775566	0.6771	0.651001	0.630202
3.93333	0.275542	0.325903	0.315087	0.236518	0.231484	0.215001	0.794203	0.787301	0.763853	0.700324	0.655049	0.621729
4	0.295158	0.314587	0.32317	0.247352	0.237128	0.216507	0.808885	0.805523	0.779967	0.691173	0.660292	0.631378
4.06667	0.290345	0.339115	0.329051	0.2503	0.247297	0.227327	0.816917	0.817644	0.785211	0.677397	0.663959	0.635127
4.13333	0.28536	0.334731	0.333878	0.262775	0.247022	0.226861	0.828935	0.821033	0.790652	0.698458	0.664867	0.65092
4.2	0.292925	0.340721	0.339855	0.260583	0.248111	0.224529	0.803869	0.819623	0.787114	0.689906	0.6675	0.653755
4.26667	0.303445	0.346142	0.336394	0.260037	0.257253	0.242008	0.808786	0.84456	0.797074	0.684512	0.672745	0.65331
4.33333	0.297021	0.343601	0.351311	0.264214	0.265215	0.245658	0.84519	0.843602	0.796538	0.723802	0.696731	0.646281
4.4	0.300844	0.348229	0.351312	0.275354	0.270912	0.245966	0.82731	0.845266	0.805718	0.693821	0.677484	0.651412
4.46667	0.315219	0.350093	0.356863	0.282493	0.273121	0.245519	0.851369	0.845438	0.814966	0.695384	0.695476	0.668674
4.53333	0.31835	0.359481	0.359223	0.283263	0.27502	0.262218	0.876417	0.82256	0.809504	0.712348	0.692976	0.657273
4.6	0.30721	0.369673	0.358923	0.282528	0.28943	0.270577	0.834431	0.860083	0.814371	0.716218	0.693248	0.669495
4.66667	0.32538	0.362252	0.382005	0.288799	0.287586	0.259697	0.856369	0.851444	0.82611	0.715834	0.697096	0.684213
4.73333	0.328677	0.363255	0.368158	0.305753	0.299244	0.266497	0.867976	0.845068	0.830766	0.731188	0.721513	0.657854
4.8	0.320631	0.379642	0.371889	0.308864	0.297733	0.278103	0.861724	0.895312	0.836436	0.711314	0.690596	0.676121
4.86667	0.333777	0.37715	0.374785	0.313294	0.299657	0.270197	0.871075	0.861085	0.834797	0.729635	0.705271	0.670335
4.93333	0.341622	0.372561	0.376517	0.310031	0.311708	0.277848	0.870668	0.884677	0.814316	0.726445	0.702665	0.670052
5	0.328323	0.385818	0.383895	0.315859	0.314498	0.290539	0.868674	0.881296	0.849357	0.736619	0.701074	0.690914
5.06667	0.34184	0.372415	0.394418	0.321247	0.318236	0.297013	0.87133	0.84484	0.841886	0.742348	0.709859	0.682004
5.13333	0.348901	0.386749	0.385938	0.324028	0.323689	0.293882	0.891372	0.838061	0.865949	0.734602	0.712352	0.697529
5.2	0.349458	0.390899	0.397397	0.328485	0.322504	0.308829	0.869177	0.900462	0.855539	0.746469	0.71205	0.703794
5.26667	0.344697	0.386639	0.406495	0.332851	0.337413	0.306539	0.887526	0.874366	0.856554	0.728246	0.703675	0.703616
5.33333	0.364113	0.394908	0.397286	0.338651	0.337209	0.304067	0.885068	0.888336	0.83518	0.735197	0.719701	0.688115
5.4	0.361204	0.396952	0.403372	0.34621	0.331448	0.316125	0.897865	0.906922	0.86311	0.731758	0.718553	0.727514
5.46667	0.367439	0.387987	0.411068	0.344386	0.335282	0.329874	0.904404	0.883367	0.87871	0.750317	0.71962	0.715022
5.53333	0.354709	0.402329	0.40505	0.356654	0.350318	0.33081	0.90458	0.902889	0.868019	0.744125	0.732416	0.727591
5.6	0.361154	0.401304	0.414284	0.35621	0.348673	0.330751	0.91073	0.875101	0.860888	0.753832	0.744293	0.737432
5.66667	0.354768	0.406099	0.412813	0.360384	0.363094	0.334664	0.908511	0.893812	0.880631	0.751327	0.724442	0.702452
5.73333	0.366514	0.417208	0.421613	0.358506	0.367987	0.341242	0.897286	0.87905	0.88058	0.746787	0.743744	0.711674
5.8	0.37016	0.411663	0.436848	0.367347	0.372526	0.335684	0.899689	0.889871	0.849154	0.77962	0.721344	0.710969
5.86667	0.37531	0.413836	0.427284	0.378347	0.369468	0.352995	0.927554	0.925446	0.891716	0.758566	0.736899	0.715272
5.93333	0.379769	0.409844	0.429262	0.376092	0.380624	0.351887	0.900948	0.900362	0.890856	0.757886	0.737752	0.720994
6	0.365825	0.412103	0.44103	0.377448	0.383947	0.352461	0.903731	0.895449	0.864036	0.748451	0.750487	0.729409
6.06667	0.378893	0.41927	0.429525	0.385974	0.378011	0.366228	0.898744	0.916625	0.88871	0.776459	0.755646	0.736883
6.13333	0.38882	0.421516	0.442265	0.39155	0.397041	0.365726	0.926361	0.937869	0.885773	0.768201	0.740934	0.723039
6.2	0.382074	0.420909	0.436679	0.394582	0.391662	0.368177	0.891741	0.944442	0.874824	0.776507	0.756288	0.732903
6.26667	0.380628	0.428395	0.447382	0.394352	0.392837	0.374716	0.920718	0.920296	0.892888	0.797613	0.747627	0.73227
6.33333	0.397873	0.437615	0.447612	0.404329	0.401227	0.382236	0.929133	0.917068	0.915577	0.785515	0.731702	0.745988
6.4	0.397551	0.428457	0.456722	0.407937	0.397393	0.39001	0.958632	0.916155	0.914781	0.777262	0.737302	0.742844
6.46667	0.38732	0.428289	0.450595	0.408863	0.415973	0.384255	0.937323	0.89013	0.896118	0.774543	0.757235	0.746976
6.53333	0.398721	0.443983	0.460624	0.409868	0.410406	0.386957	0.924522	0.912328	0.915156	0.787471	0.755116	0.740459
6.6	0.389255	0.440848	0.45695	0.422503	0.42223	0.393916	0.927047	0.90807	0.921013	0.787012	0.752539	0.731291
6.66667	0.401802	0.437015	0.476781	0.421919	0.428759	0.395509	0.949135	0.942902	0.905514	0.795428	0.748699	0.736835
6.73333	0.402543	0.447493	0.474846	0.41544	0.427657	0.409056	0.954306	0.939321	0.925743	0.779142	0.762384	0.716569
6.8	0.406709	0.440387	0.454884	0.421668	0.424226	0.408067	0.926788	0.930644	0.936406	0.79172	0.749548	0.737257
6.86667	0.412386	0.447665	0.454537	0.432995	0.442872	0.410388	0.947185	0.931377	0.925623	0.81656	0.742297	0.756397
6.93333	0.411375	0.455345	0.474125	0.42683	0.43556	0.407604	0.948623	0.949851	0.927642	0.807283	0.752687	0.745926
7	0.405977	0.458068	0.472874	0.431391	0.45592	0.415919	0.962746	0.936273	0.928289	0.781726	0.763738	0.748
7.06667	0.413961	0.456411	0.470411	0.436561	0.443154	0.422361	0.939259	0.933142	0.943535	0.786091	0.75253	0.760458
7.13333	0.416811	0.459129	0.474472	0.429524	0.450308	0.427463	0.927839	0.934183	0.935506	0.780503	0.753077	0.763715
7.2	0.410485	0.462296	0.482533	0.43996	0.459451	0.425719	0.976778	0.919471	0.91884	0.804619	0.738411	0.74163
7.26667	0.399991	0.454147	0.461138	0.443977	0.444471	0.442387	0.962864	0.947377	0.921015	0.80966	0.755386	0.753241
7.33333	0.416771	0.452721	0.483649	0.454029	0.457926	0.436759	0.958041	0.949545	0.930811	0.813231	0.771394	0.752685
7.4	0.423002	0.460922	0.48041	0.464348	0.461249	0.447491	0.960726	0.93189	0.929672	0.79981	0.767012	0.747692
7.46667	0.404001	0.46363	0.493905	0.452064	0.470318	0.446907	0.951869	0.942905	0.932515	0.806233	0.782445	0.750849
7.53333	0.411931	0.456384	0.489041	0.453767	0.473254	0.439181	0.968188	0.952489	0.913458	0.803281	0.742594	0.739455
7.6	0.415797	0.454124	0.479778	0.464937	0.470699	0.457197	0.954017	0.964404	0.917201	0.781665	0.765499	0.753126
7.66667	0.412022	0.462971	0.484321	0.469514	0.480044	0.456254	0.962018	0.928836	0.945149	0.796135	0.763104	0.770353
7.73333	0.425666	0.46574	0.486713	0.467309	0.463479	0.452061	0.965603	0.960331	0.96887	0.809588	0.755466	0.745594
7.8	0.420754	0.462645	0.498452	0.47771	0.48523	0.474348	0.972041	0.960707	0.95582	0.797437	0.758267	0.757585
7.86667	0.430951	0.46802	0.500439	0.469221	0.48333	0.459865	0.979254	0.951406	0.941233	0.815817	0.768089	0.766631
7.93333	0.432579	0.480653	0.494154	0.472503	0.47369	0.474269	0.969517	0.965102	0.949103	0.802864	0.745218	0.76176
8	0.421936	0.476844	0.491272	0.478708	0.480766	0.478885	0.969222	0.938728	0.941029	0.789313	0.779153	0.760169
8.06667	0.427203	0.461989	0.494439	0.471326	0.498615	0.471268	0.998279	0.94351	0.935462	0.81917	0.762653	0.754945
8.13333	0.426002	0.469715	0.505217	0.489028	0.490013	0.469046	0.964589	0.949087	0.955894	0.813226	0.744171	0.762174
8.2	0.42571	0.462098	0.491712	0.49247	0.499773	0.480029	0.964599	0.957092	0.969712	0.811153	0.773146	0.771876
8.26667	0.41959	0.470297	0.512763	0.500512	0.510036	0.484288	0.983866	1	0.956422	0.800454	0.769247	0.774072
8.33333	0.443239	0.48544	0.50995	0.474814	0.52218	0.477645	1	0.95399	0.956331	0.793475	0.753865	0.750996
8.4	0.454469	0.480218	0.525561	0.505372	0.510421	0.49924	0.981796	0.937596	0.9466	0.81502	0.753204	0.765215
8.46667	0.433845	0.463095	0.500399	0.500644	0.508178	0.489473	0.974321	0.941757	0.949604	0.797774	0.758245	0.760401
8.53333	0.441193	0.477248	0.52433	0.506038	0.516011	0.508736	0.979334	0.92559	0.958217	0.799359	0.780484	0.758281
8.6	0.437479	0.477383	0.515765	0.509743	0.513574	0.500138	0.962894	0.953781	0.95063	0.798029	0.759325	0.770424
8.66667	0.440054	0.480324	0.514785	0.51406	0.516908	0.49844	0.987744	0.959016	0.96367	0.808252	0.753445	0.771272
8.73333	0.432004	0.486478	0.502796	0.492259	0.52057	0.49273	0.959233	0.958104	0.952997	0.796769	0.765562	0.775776
8.8	0.428499	0.493287	0.520498	0.519358	0.530346	0.514478	0.978974	0.951642	0.964935	0.790453	0.767004	0.762219
8.86667	0.432042	0.481888	0.518961	0.509987	0.530821	0.512269	0.970093	0.958026	0.955611	0.808241	0.751219	0.764784
8.93333	0.444244	0.491525	0.511202	0.523255	0.5193	0.513751	0.988948	0.965592	0.95478	0.79456	0.765463	0.759935
9	0.441124	0.489847	0.51722	0.533961	0.529411	0.527181	0.991459	0.974375	0.972775	0.80986	0.771381	0.761843
9.06667	0.449916	0.482994	0.525474	0.521631	0.528885	0.521171	0.981796	0.968579	0.975243	0.811349	0.740412	0.790552
9.13333	0.448402	0.495664	0.51626	0.528705	0.547166	0.510731	0.98097	0.940994	0.965368	0.818771	0.767235	0.757701
9.2	0.437288	0.499422	0.539399	0.516311	0.527182	0.520685	0.975962	0.962753	0.967332	0.832594	0.761393	0.758605
9.26667	0.454561	0.499672	0.53312	0.521756	0.549477	0.527239	0.97578	0.959297	0.966632	0.815826	0.783586	0.778521
9.33333	0.436549	0.495769	0.543664	0.527097	0.536577	0.529912	0.972472	0.968965	0.967605	0.806249	0.780886	0.760998
9.4	0.45859	0.496026	0.542298	0.550708	0.54131	0.539255	0.995526	0.948836	0.939198	0.798526	0.771888	0.782106
9.46667	0.437442	0.500933	0.543775	0.534865	0.553123	0.534396	0.966903	0.955168	0.996617	0.822399	0.758962	0.7728
9.53333	0.444492	0.498344	0.540937	0.535351	0.555413	0.541164	0.994949	0.962524	0.976134	0.812797	0.77217	0.760698
9.6	0.454168	0.481356	0.529255	0.539074	0.54599	0.52977	0.992543	0.950664	0.952634	0.797998	0.783813	0.782475
9.66667	0.456297	0.509003	0.536784	0.561601	0.559643	0.536091	0.984137	0.981693	0.994638	0.805118	0.751191	0.787735
9.73333	0.446673	0.496197	0.535032	0.546419	0.54984	0.554629	0.977704	0.959734	0.945275	0.817258	0.759133	0.766659
9.8	0.445139	0.498804	0.529787	0.550746	0.552668	0.552439	0.969664	0.947082	0.964831	0.823218	0.73671	0.756396
9.86667	0.45125	0.491902	0.54078	0.527678	0.56723	0.545677	0.974466	0.947117	0.970027	0.811739	0.77436	0.784275
9.93333	0.459043	0.50197	0.534964	0.555876	0.551114	0.561053	0.99475	0.971323	0.959422	0.821647	0.760737	0.764311
10	0.452575	0.498432	0.539439	0.545009	0.565836	0.560984	0.971761	0.959232	0.95589	0.824375	0.771037	0.766615
10.0667	0.458715	0.50338	0.541691	0.547061	0.577541	0.550256	0.975294	0.969884	0.978737	0.816557	0.770958	0.776061
10.1333	0.454978	0.503966	0.543723	0.547445	0.557418	0.559202	0.97901	0.960751	0.976049	0.829785	0.773324	0.763883
10.2	0.450811	0.490728	0.538048	0.534396	0.576264	0.566587	0.958339	0.950492	0.970141	0.837239	0.76301	0.755736
10.2667	0.45863	0.50914	0.540631	0.54814	0.569339	0.568434	0.973541	0.957161	0.953148	0.812055	0.746745	0.771067
10.3333	0.449038	0.50334	0.542483	0.559924	0.565856	0.565271	0.973725	0.957102	0.959911	0.821233	0.742441	0.758645
10.4	0.45151	0.500782	0.544278	0.563015	0.563767	0.571274	0.988455	0.986516	0.93524	0.789178	0.754109	0.771051
10.4667	0.45025	0.508517	0.534024	0.554482	0.581726	0.561521	0.985409	0.978157	0.993363	0.818726	0.766892	0.75364
10.5333	0.45859	0.496041	0.525472	0.554942	0.588278	0.587361	0.974189	0.975749	0.947637	0.806015	0.752341	0.78418
10.6	0.456758	0.504006	0.540083	0.57013	0.585365	0.561928	0.986898	0.952295	0.978745	0.815923	0.758805	0.779619
10.6667	0.456937	0.511177	0.558433	0.586143	0.575925	0.578922	0.988098	0.962182	0.945335	0.813792	0.779894	0.771951
10.7333	0.454343	0.521867	0.551038	0.562262	0.568119	0.570253	0.99956	0.950237	0.969849	0.827274	0.751329	0.762657
10.8	0.451326	0.517346	0.553341	0.564961	0.604928	0.600406	0.960458	0.969472	0.96496	0.818967	0.762796	0.769033
10.8667	0.450955	0.503972	0.563374	0.578604	0.586013	0.585276	0.980093	0.949209	0.985655	0.812725	0.753834	0.773435
10.9333	0.460968	0.5089	0.556036	0.585401	0.590869	0.582679	0.969147	0.964178	0.983865	0.795402	0.767885	0.793736
11	0.464389	0.498128	0.560438	0.565626	0.600612	0.591175	0.988021	0.958409	0.962273	0.829529	0.772865	0.7903
11.0667	0.461216	0.521587	0.562973	0.588832	0.591062	0.588274	0.969116	0.953277	0.95743	0.786605	0.750068	0.769214
11.1333	0.451299	0.496208	0.560028	0.565425	0.610505	0.580463	0.983879	0.951196	0.976186	0.802178	0.768515	0.762587
11.2	0.457389	0.513772	0.554555	0.582951	0.591632	0.596825	0.950646	0.951349	0.963117	0.800698	0.772994	0.757357
11.2667	0.456384	0.51364	0.540048	0.602287	0.59563	0.594835	0.957541	0.942467	0.937213	0.816192	0.740994	0.783693
11.3333	0.472402	0.519465	0.563562	0.595829	0.604878	0.587823	0.968112	0.952084	0.978946	0.816542	0.736245	0.77277
11.4	0.453517	0.522434	0.563257	0.581042	0.588256	0.591033	0.99658	0.964974	0.944858	0.805283	0.739387	0.778899
11.4667	0.451877	0.523842	0.549615	0.582506	0.608722	0.585482	0.955066	0.96556	0.968239	0.806966	0.749335	0.756818
11.5333	0.458985	0.524405	0.568525	0.57694	0.613563	0.585086	0.989773	0.98581	0.995731	0.788855	0.755473	0.78402
11.6	0.471533	0.514539	0.567728	0.570887	0.607927	0.577698	0.978326	0.959849	0.948486	0.797684	0.754252	0.778818
11.6667	0.460377	0.526879	0.551792	0.58831	0.600228	0.599099	0.973969	0.964525	0.986184	0.816257	0.761686	0.766442
11.7333	0.464693	0.514522	0.573337	0.59102	0.601363	0.608164	0.962466	0.962053	1	0.80517	0.758053	0.756578
11.8	0.459089	0.515236	0.55848	0.59429	0.611368	0.608701	0.971191	0.955604	0.961612	0.814762	0.755202	0.772444
11.8667	0.460901	0.514256	0.559035	0.59884	0.614698	0.609444	0.967916	0.942548	0.964268	0.804789	0.760172	0.780847
11.9333	0.462631	0.508103	0.574762	0.606522	0.600464	0.620248	0.980779	0.946395	0.957316	0.793553	0.758483	0.774668
12	0.463489	0.507736	0.563149	0.595897	0.608648	0.610248	0.976887	0.976617	0.956533	0.807247	0.744192	0.767142
12.0667	0.464662	0.51896	0.571719	0.589426	0.598728	0.617579	0.998512	0.943883	0.950351	0.794751	0.7432	0.773938
12.1333	0.464544	0.518078	0.567042	0.587658	0.607108	0.6234	0.961535	0.953102	0.969703	0.793494	0.749068	0.747797
12.2	0.475887	0.523299	0.583755	0.589289	0.627695	0.611575	0.974382	0.950631	0.956628	0.809266	0.747197	0.761655
12.2667	0.462454	0.521383	0.579475	0.605465	0.607846	0.602288	0.976865	0.931111	0.965987	0.799163	0.746372	0.761488
12.3333	0.465189	0.520331	0.561949	0.596059	0.606806	0.613641	0.957865	0.95724	0.985715	0.770123	0.759349	0.751021
12.4	0.4644	0.520055	0.561792	0.594736	0.608133	0.626746	0.955574	0.943615	0.978167	0.81657	0.739053	0.780198
12.4667	0.467697	0.522013	0.582837	0.585461	0.61648	0.62093	0.976173	0.956031	0.966462	0.808362	0.738928	0.759006
12.5333	0.460947	0.518829	0.576185	0.595145	0.622278	0.645952	0.969936	0.956187	0.970073	0.795828	0.752255	0.76947
12.6	0.466423	0.521796	0.574285	0.607174	0.630238	0.602193	0.950485	0.951508	0.943049	0.801147	0.75329	0.775713
12.6667	0.457416	0.512371	0.562283	0.596281	0.63262	0.6253	0.983702	0.946037	0.942696	0.78477	0.736868	0.751987
12.7333	0.470349	0.522221	0.564065	0.614293	0.645567	0.640341	0.976284	0.944201	0.955097	0.798012	0.747916	0.760318
12.8	0.469443	0.532328	0.561406	0.613722	0.626228	0.622967	0.952041	0.92091	0.974667	0.784983	0.748925	0.767969
12.8667	0.474191	0.517896	0.57731	0.60212	0.619314	0.636329	0.961715	0.950043	0.965214	0.798273	0.730801	0.758086
12.9333	0.466407	0.530647	0.591697	0.610002	0.630242	0.632685	0.965645	0.949444	0.976855	0.795077	0.727581	0.801835
13	0.464514	0.522313	0.59549	0.601551	0.620598	0.624998	0.974346	0.954892	0.942501	0.798233	0.751255	0.758663
13.0667	0.466686	0.525455	0.575646	0.617115	0.641239	0.625575	0.972412	0.956897	0.951378	0.782592	0.745878	0.769606
13.1333	0.462537	0.529256	0.565331	0.605404	0.624355	0.640653	0.961745	0.948174	0.944663	0.788697	0.748981	0.750641
13.2	0.469294	0.535947	0.580686	0.598427	0.631254	0.638872	0.957802	0.941625	0.951273	0.793845	0.750957	0.75726
13.2667	0.46748	0.528929	0.581616	0.624006	0.617759	0.63183	0.945614	0.949264	0.980129	0.809038	0.762407	0.767767
13.3333	0.468288	0.53337	0.571323	0.618756	0.628865	0.651649	0.961026	0.956013	0.956238	0.785661	0.737608	0.745653
13.4	0.473621	0.524388	0.568277	0.604562	0.640634	0.648206	0.968583	0.950644	0.960087	0.797526	0.73271	0.768346
13.4667	0.469048	0.531606	0.5806	0.602549	0.642564	0.642452	0.967371	0.954855	0.966867	0.799954	0.75108	0.761002
13.5333	0.46579	0.51756	0.585018	0.616007	0.636307	0.640732	0.947877	0.917685	0.953941	0.784041	0.755966	0.7357
13.6	0.493032	0.517558	0.59394	0.611576	0.633719	0.634784	0.955878	0.922697	0.956105	0.788575	0.738253	0.755075
13.6667	0.467513	0.52737	0.574958	0.623687	0.638818	0.634646	0.948573	0.916591	0.939574	0.798036	0.722525	0.773083
13.7333	0.47392	0.519127	0.576501	0.615004	0.637284	0.634169	0.946337	0.923135	0.947822	0.789275	0.742417	0.744048
13.8	0.468397	0.518024	0.567023	0.623848	0.639947	0.625398	0.970275	0.935822	0.954392	0.789213	0.71369	0.739602
13.8667	0.466345	0.530101	0.580257	0.619898	0.652108	0.638055	0.937667	0.937175	0.972125	0.775093	0.737524	0.747677
13.9333	0.465008	0.520546	0.570908	0.61148	0.633824	0.651501	0.95979	0.946057	0.949555	0.785376	0.733511	0.756473
14	0.46656	0.513352	0.578479	0.629786	0.636546	0.638221	0.951971	0.940104	0.954966	0.793316	0.747787	0.768903
14.0667	0.459477	0.527176	0.582135	0.613433	0.653086	0.657041	0.95476	0.902732	0.945077	0.790404	0.723125	0.733228
14.1333	0.4796	0.525613	0.584872	0.627332	0.639492	0.654798	0.92571	0.898196	0.952288	0.788417	0.738989	0.755844
14.2	0.466183	0.536141	0.594958	0.614219	0.635844	0.659819	0.949858	0.943883	0.951651	0.791881	0.734005	0.75857
14.2667	0.475333	0.522001	0.595918	0.622707	0.644015	0.65745	0.957441	0.934799	0.936731	0.769719	0.739287	0.753877
14.3333	0.477652	0.521543	0.578064	0.623992	0.650127	0.644548	0.956727	0.915686	0.940005	0.754463	0.743293	0.751125
14.4	0.473965	0.516193	0.56898	0.614746	0.637486	0.662	0.9302	0.95586	0.948807	0.804056	0.732716	0.761865
14.4667	0.469929	0.51612	0.591802	0.642927	0.655061	0.653335	0.939697	0.91198	0.960285	0.788599	0.737526	0.735126
14.5333	0.474493	0.526501	0.576457	0.635713	0.645815	0.666888	0.964281	0.941347	0.944049	0.780261	0.729174	0.747888
14.6	0.477764	0.529292	0.589342	0.628706	0.642646	0.659168	0.938822	0.910477	0.942598	0.772985	0.723194	0.731899
14.6667	0.464373	0.542082	0.596229	0.62984	0.633165	0.666014	0.916698	0.917342	0.956533	0.76654	0.743813	0.744489
14.7333	0.468488	0.519214	0.568384	0.639878	0.638508	0.646533	0.923938	0.9331	0.947107	0.790239	0.720222	0.739319
14.8	0.467966	0.537023	0.57052	0.618042	0.631364	0.685516	0.939847	0.934261	0.960965	0.765269	0.728416	0.757781
14.8667	0.47467	0.518198	0.59075	0.630805	0.64905	0.654759	0.940213	0.92381	0.933469	0.780221	0.721688	0.750285
14.9333	0.473232	0.525998	0.565223	0.626659	0.631298	0.667535	0.960212	0.913661	0.959017	0.78563	0.720494	0.75916
15	0.476379	0.527102	0.597219	0.631173	0.644896	0.667609	0.935558	0.89993	0.945424	0.776334	0.740957	0.759183
15.0667	0.479355	0.522467	0.590132	0.628589	0.646363	0.664398	0.937404	0.909439	0.934048	0.779633	0.711451	0.742963
15.1333	0.478157	0.524525	0.602077	0.636288	0.650024	0.670358	0.944356	0.935534	0.93904	0.770821	0.738199	0.73554
15.2	0.467605	0.534518	0.585509	0.627122	0.625967	0.670129	0.929308	0.915675	0.938685	0.782735	0.721175	0.736738
15.2667	0.470716	0.524594	0.584927	0.619207	0.655046	0.668995	0.951781	0.902312	0.928329	0.791252	0.723692	0.756478
15.3333	0.471001	0.512816	0.585201	0.640843	0.656384	0.653322	0.952764	0.898013	0.92265	0.764833	0.725066	0.73549
15.4	0.46871	0.529298	0.584059	0.629117	0.638279	0.667867	0.912588	0.940254	0.928163	0.778541	0.711495	0.744048
15.4667	0.47037	0.533631	0.590299	0.642583	0.642341	0.665348	0.919494	0.92	0.940036	0.773445	0.69177	0.733022
15.5333	0.466362	0.532083	0.595487	0.622	0.630354	0.67328	0.913823	0.890354	0.923286	0.772294	0.72777	0.728359
15.6	0.476037	0.543356	0.599911	0.622434	0.642168	0.662338	0.94922	0.92688	0.919981	0.779301	0.72622	0.746179
15.6667	0.474	0.532791	0.586727	0.63369	0.657454	0.666831	0.918128	0.888221	0.922645	0.764254	0.719977	0.74566
15.7333	0.470016	0.529992	0.590589	0.637437	0.65212	0.679509	0.935435	0.928515	0.932938	0.743274	0.7265	0.747086
15.8	0.46444	0.527067	0.596809	0.632115	0.652154	0.662715	0.93363	0.904998	0.89932	0.765566	0.724414	0.75168
15.8667	0.46928	0.523145	0.582249	0.625107	0.636209	0.672155	0.934754	0.908794	0.935411	0.792263	0.703492	0.745993
15.9333	0.475624	0.543953	0.588763	0.629597	0.65403	0.669127	0.922949	0.880513	0.913693	0.759099	0.722347	0.735506
16	0.463576	0.532133	0.607838	0.610887	0.66105	0.665993	0.907487	0.896076	0.927845	0.775815	0.72895	0.723704
16.0667	0.460632	0.538349	0.588721	0.637481	0.65676	0.662682	0.931742	0.893824	0.937882	0.761831	0.70632	0.744728
16.1333	0.484457	0.519905	0.591376	0.646514	0.652438	0.666551	0.924618	0.898888	0.92365	0.77666	0.707914	0.765681
16.2	0.479615	0.522053	0.597796	0.621117	0.629566	0.677346	0.934437	0.90426	0.897252	0.773659	0.733443	0.738022
16.2667	0.468563	0.525607	0.583065	0.624282	0.650398	0.686969	0.915661	0.907733	0.909598	0.759261	0.714921	0.736562
16.3333	0.458757	0.531801	0.590081	0.624915	0.654751	0.698751	0.907769	0.903808	0.915038	0.754035	0.695742	0.739772
16.4	0.48022	0.528258	0.598147	0.621891	0.645035	0.669632	0.914784	0.904427	0.922694	0.775301	0.717993	0.730516
16.4667	0.478551	0.516819	0.589039	0.633204	0.651625	0.671024	0.917838	0.887745	0.925181	0.736926	0.73003	0.734352
16.5333	0.470364	0.531154	0.574991	0.637027	0.652146	0.671882	0.927625	0.891824	0.915207	0.738273	0.703247	0.747081
16.6	0.474141	0.540873	0.582933	0.640636	0.654618	0.674247	0.934207	0.905371	0.92833	0.743116	0.700273	0.735315
16.6667	0.482509	0.524836	0.593673	0.632498	0.642505	0.685702	0.903986	0.910693	0.924586	0.75891	0.688262	0.71714
16.7333	0.461751	0.526673	0.60279	0.645853	0.625878	0.686781	0.913781	0.893857	0.914772	0.754712	0.718547	0.717719
16.8	0.470672	0.542009	0.59539	0.61919	0.644387	0.678489	0.899181	0.887855	0.908473	0.747635	0.699115	0.750249
16.8667	0.460703	0.539124	0.595516	0.639048	0.655492	0.69246	0.90394	0.898953	0.901996	0.754238	0.692255	0.722018
16.9333	0.482634	0.533338	0.581771	0.622888	0.657992	0.695908	0.930269	0.893476	0.910622	0.7583	0.700761	0.724534
17	0.477047	0.528933	0.590209	0.636093	0.676378	0.682968	0.923212	0.889863	0.921743	0.743275	0.720817	0.729873
17.0667	0.464574	0.51755	0.596125	0.636881	0.6422	0.681744	0.929101	0.905577	0.904119	0.728607	0.703655	0.744413
17.1333	0.462277	0.51364	0.587809	0.63541	0.648052	0.689527	0.893249	0.887053	0.905301	0.75644	0.718633	0.726635
17.2	0.462998	0.523845	0.602579	0.632922	0.66032	0.693473	0.884486	0.879081	0.931358	0.756551	0.695937	0.716521
17.2667	0.472101	0.525538	0.603235	0.65167	0.654406	0.683207	0.906034	0.902956	0.91715	0.737391	0.693058	0.744216
17.3333	0.476609	0.532336	0.592887	0.618137	0.6693	0.686082	0.913726	0.873315	0.920305	0.746774	0.690377	0.716283
17.4	0.474077	0.525566	0.586998	0.631572	0.64994	0.683233	0.9226	0.891083	0.937655	0.770393	0.711489	0.716975
17.4667	0.471805	0.528392	0.591784	0.633447	0.659132	0.685881	0.922211	0.884226	0.899698	0.765082	0.708879	0.729703
17.5333	0.465246	0.540743	0.584264	0.651438	0.656786	0.674767	0.907279	0.872257	0.916754	0.726809	0.721502	0.711707
17.6	0.467115	0.550677	0.589954	0.643966	0.660267	0.681924	0.925841	0.87807	0.909618	0.752001	0.697685	0.727091
17.6667	0.454223	0.534748	0.59312	0.645525	0.643742	0.703838	0.904191	0.859291	0.909916	0.740189	0.700414	0.728022
17.7333	0.467104	0.533965	0.590566	0.642251	0.663135	0.69785	0.896103	0.890306	0.911297	0.743612	0.683744	0.726432
17.8	0.471296	0.539069	0.590426	0.648985	0.647495	0.683287	0.907937	0.875094	0.908384	0.741317	0.711235	0.724282
17.8667	0.465813	0.521009	0.585521	0.637614	0.650555	0.668897	0.875477	0.898604	0.908256	0.733106	0.695409	0.73968
17.9333	0.468752	0.537252	0.593128	0.649698	0.659152	0.701082	0.905324	0.865598	0.933613	0.748474	0.686985	0.715968
18	0.481296	0.521851	0.591187	0.640308	0.659809	0.679197	0.906171	0.881071	0.890323	0.731105	0.698843	0.720751
18.0667	0.474348	0.519284	0.583636	0.627082	0.656062	0.669281	0.913014	0.879074	0.897539	0.744812	0.68632	0.73531
18.1333	0.475697	0.548896	0.595375	0.652484	0.65009	0.692512	0.898478	0.899178	0.907178	0.74761	0.685599	0.727102
18.2	0.464753	0.537705	0.581019	0.647556	0.644031	0.67074	0.876062	0.886882	0.891654	0.741634	0.682916	0.712491
18.2667	0.476633	0.533512	0.594733	0.636334	0.644211	0.678034	0.873506	0.887818	0.90655	0.740105	0.689138	0.701291
18.3333	0.4701	0.534808	0.590538	0.648068	0.643757	0.686571	0.889397	0.863128	0.889989	0.733843	0.69286	0.713052
18.4	0.470622	0.528727	0.585892	0.641341	0.64902	0.674117	0.911949	0.879313	0.885279	0.719625	0.708113	0.72927
18.4667	0.475901	0.523813	0.590929	0.63522	0.656382	0.686892	0.900607	0.870551	0.893634	0.72688	0.675486	0.722211
18.5333	0.468702	0.528498	0.593673	0.643845	0.6534	0.686868	0.911958	0.868435	0.898612	0.734602	0.674748	0.718118
18.6	0.469227	0.528071	0.581865	0.637908	0.65723	0.671337	0.872948	0.866311	0.914063	0.75733	0.689167	0.719521
18.6667	0.471773	0.532456	0.60243	0.624001	0.668849	0.686535	0.884636	0.863519	0.871447	0.733239	0.697109	0.719404
18.7333	0.470722	0.531113	0.59772	0.632377	0.671736	0.69162	0.889641	0.890774	0.878098	0.737339	0.693862	0.701434
18.8	0.469261	0.526368	0.59338	0.627063	0.660275	0.690747	0.878188	0.861818	0.893782	0.737377	0.68275	0.709145
18.8667	0.455103	0.531692	0.59566	0.64656	0.661801	0.708256	0.877305	0.853079	0.86912	0.733693	0.675778	0.72108
18.9333	0.469431	0.541103	0.600774	0.642511	0.654062	0.682661	0.871564	0.85759	0.919739	0.738014	0.688992	0.717214
19	0.464803	0.530098	0.600397	0.660521	0.662488	0.667914	0.883687	0.85562	0.887332	0.751723	0.676122	0.700338
19.0667	0.455178	0.526281	0.593329	0.644834	0.646296	0.694398	0.888917	0.845888	0.902447	0.726701	0.683162	0.709705
19.1333	0.449076	0.521244	0.593342	0.637335	0.644032	0.679671	0.892917	0.856481	0.889608	0.736061	0.685573	0.702952
19.2	0.464176	0.529534	0.583612	0.628297	0.660618	0.6918	0.895173	0.852875	0.913601	0.705948	0.690811	0.718565
19.2667	0.471987	0.527459	0.58524	0.642334	0.664509	0.699293	0.881253	0.878334	0.888771	0.722244	0.698445	0.717644
19.3333	0.473956	0.532391	0.591745	0.636998	0.648892	0.686839	0.880328	0.858841	0.887335	0.728723	0.681604	0.712038
19.4	0.468985	0.525113	0.606307	0.63676	0.650557	0.698033	0.878981	0.855713	0.890307	0.718449	0.691513	0.727096
19.4667	0.466267	0.533981	0.592118	0.635107	0.662999	0.704613	0.876293	0.850697	0.888539	0.737295	0.687556	0.707531
19.5333	0.467209	0.528807	0.586774	0.643516	0.653591	0.692476	0.891044	0.861234	0.915558	0.746112	0.666942	0.712527
19.6	0.469002	0.524749	0.594717	0.639042	0.679872	0.665938	0.885221	0.856207	0.89018	0.710287	0.693633	0.711182
19.6667	0.455909	0.515247	0.591832	0.646433	0.655644	0.693158	0.858634	0.837853	0.871204	0.715598	0.681449	0.73096
19.7333	0.4563	0.522067	0.591908	0.637232	0.658733	0.69563	0.885295	0.845787	0.887277	0.731788	0.671105	0.704521
19.8	0.461599	0.521569	0.59201	0.631214	0.656061	0.692203	0.86555	0.858958	0.87088	0.736382	0.673133	0.709172
19.8667	0.459137	0.515731	0.584193	0.627578	0.654691	0.687963	0.882	0.878999	0.895112	0.73829	0.681155	0.708228
19.9333	0.458339	0.535854	0.59632	0.642661	0.657177	0.697348	0.873907	0.846704	0.8926	0.716032	0.702248	0.705355
20	0.466759	0.541601	0.57375	0.635967	0.653008	0.698399	0.873203	0.845103	0.896565	0.718063	0.666422	0.691087
20.0667	0.457622	0.51647	0.594474	0.63491	0.637358	0.679912	0.874411	0.861066	0.892171	0.703475	0.680063	0.695368
20.1333	0.470878	0.530681	0.587865	0.629515	0.666947	0.69516	0.862359	0.838459	0.896727	0.696565	0.682305	0.700894
20.2	0.465821	0.526989	0.586418	0.637545	0.653002	0.676788	0.866643	0.851799	0.882233	0.700879	0.68524	0.705899
20.2667	0.467739	0.524668	0.586049	0.621816	0.648672	0.682916	0.870496	0.860031	0.880403	0.706201	0.670289	0.7136
20.3333	0.46139	0.518433	0.575819	0.644325	0.666288	0.693452	0.869262	0.851623	0.876174	0.731351	0.680381	0.699712
20.4	0.456417	0.529253	0.572108	0.635446	0.657449	0.686212	0.857282	0.825799	0.877567	0.696652	0.686141	0.715134
20.4667	0.466843	0.538941	0.582965	0.631443	0.626156	0.676217	0.857448	0.850122	0.854779	0.707437	0.68795	0.704926
20.5333	0.455016	0.518629	0.604456	0.621363	0.656139	0.701966	0.87721	0.848685	0.880739	0.718329	0.671992	0.698723
20.6	0.466054	0.518327	0.595005	0.643786	0.667153	0.697986	0.859611	0.821623	0.840638	0.696707	0.655342	0.70576
20.6667	0.457075	0.523335	0.598567	0.641928	0.665221	0.714496	0.850575	0.842541	0.872483	0.71097	0.669372	0.70884
20.7333	0.46506	0.505376	0.598222	0.626497	0.64212	0.675593	0.855906	0.843559	0.870292	0.724602	0.665788	0.700161
20.8	0.457131	0.522736	0.586867	0.620481	0.634803	0.699085	0.865674	0.825049	0.867756	0.701887	0.670554	0.690766
20.8667	0.46539	0.52977	0.580289	0.646374	0.647738	0.686256	0.860574	0.816079	0.875459	0.71172	0.673909	0.713964
20.9333	0.469378	0.525092	0.591917	0.610846	0.644912	0.699292	0.834076	0.84286	0.8659	0.718718	0.665601	0.692723
21	0.473685	0.531227	0.588258	0.637471	0.6498	0.685975	0.857007	0.859985	0.862615	0.709842	0.665135	0.702039
21.0667	0.462789	0.52139	0.599973	0.632924	0.657512	0.676708	0.869338	0.844186	0.871066	0.708748	0.680135	0.701047
21.1333	0.456496	0.533601	0.59595	0.648846	0.627319	0.691767	0.856824	0.840018	0.84398	0.696149	0.66749	0.692867
21.2	0.465285	0.525971	0.602637	0.637861	0.633964	0.69314	0.857334	0.846534	0.86648	0.6944	0.651543	0.709189
21.2667	0.466806	0.519447	0.587249	0.635637	0.647555	0.693312	0.865505	0.826871	0.851475	0.71609	0.664907	0.720071
21.3333	0.458716	0.509371	0.587776	0.616001	0.655424	0.680172	0.865997	0.815037	0.859642	0.707141	0.665064	0.705023
21.4	0.459458	0.527558	0.599312	0.633893	0.637071	0.68499	0.864288	0.821482	0.858197	0.723352	0.668088	0.703738
21.4667	0.455226	0.529816	0.593671	0.634309	0.656838	0.696567	0.822122	0.834603	0.873511	0.713667	0.647329	0.693146
21.5333	0.461155	0.525403	0.599043	0.627535	0.647598	0.68983	0.851074	0.821564	0.866427	0.705059	0.654174	0.695629
21.6	0.458402	0.518295	0.601949	0.646177	0.649352	0.682751	0.860651	0.836909	0.859359	0.702295	0.651145	0.696676
21.6667	0.45864	0.534403	0.577717	0.633583	0.654881	0.710337	0.845488	0.82097	0.874871	0.696965	0.63973	0.684599
21.7333	0.459761	0.515544	0.576527	0.627632	0.647587	0.662399	0.848223	0.851883	0.859755	0.707242	0.649085	0.677008
21.8	0.458744	0.533405	0.594024	0.630545	0.655135	0.684524	0.849439	0.817085	0.848866	0.697918	0.665685	0.678183
21.8667	0.461358	0.515838	0.590173	0.634547	0.659277	0.698886	0.876607	0.844593	0.837043	0.710529	0.660671	0.67966
21.9333	0.46401	0.52011	0.588737	0.641063	0.644597	0.69213	0.84329	0.804551	0.86006	0.681444	0.660126	0.686377
22	0.452618	0.511701	0.590056	0.633154	0.654375	0.688535	0.822755	0.807006	0.864817	0.692962	0.661198	0.690433
22.0667	0.45497	0.528391	0.590216	0.62431	0.652486	0.68205	0.866386	0.83223	0.85552	0.691513	0.65741	0.672148
22.1333	0.459209	0.534514	0.585526	0.652116	0.644448	0.670959	0.851925	0.847433	0.864716	0.717112	0.646175	0.683664
22.2	0.45812	0.509176	0.60989	0.634059	0.637366	0.675658	0.834847	0.828749	0.851806	0.698668	0.649348	0.69465
22.2667	0.449524	0.514401	0.580546	0.6375	0.648694	0.683854	0.864346	0.833189	0.856489	0.686877	0.653262	0.674289
22.3333	0.456203	0.512711	0.600866	0.635228	0.647362	0.673068	0.854075	0.8179	0.843687	0.691996	0.658905	0.696953
22.4	0.447997	0.524323	0.591202	0.635167	0.677506	0.686688	0.845142	0.803899	0.841664	0.713826	0.659803	0.704681
22.4667	0.449697	0.534182	0.583176	0.630102	0.640016	0.698157	0.846637	0.819042	0.867447	0.696481	0.652396	0.678674
22.5333	0.451451	0.518393	0.597303	0.635881	0.644322	0.697555	0.828064	0.803987	0.857187	0.675703	0.655744	0.664465
22.6	0.454825	0.514185	0.594834	0.645656	0.633626	0.662019	0.826323	0.815803	0.850317	0.692953	0.647857	0.684742
22.6667	0.464624	0.525865	0.59531	0.653439	0.640948	0.707389	0.852446	0.81296	0.847772	0.679467	0.634279	0.689028
22.7333	0.45867	0.519353	0.593791	0.627981	0.635966	0.687164	0.829523	0.810782	0.86632	0.692324	0.659614	0.668591
22.8	0.450315	0.52754	0.569838	0.625244	0.653317	0.671182	0.84205	0.8041	0.837921	0.683149	0.646429	0.661985
22.8667	0.459249	0.52308	0.583675	0.630627	0.654419	0.670811	0.824893	0.807608	0.840407	0.687621	0.663138	0.674727
22.9333	0.458893	0.526199	0.597776	0.633088	0.637206	0.674724	0.833148	0.825511	0.837721	0.707267	0.641816	0.681637
23	0.445972	0.522289	0.593501	0.61723	0.66357	0.676073	0.83004	0.810226	0.856586	0.699663	0.657775	0.670337
23.0667	0.460893	0.520152	0.596378	0.623849	0.648566	0.680263	0.830785	0.796813	0.852456	0.683709	0.657768	0.677664
23.1333	0.454737	0.513336	0.602263	0.633525	0.653341	0.68876	0.813887	0.795428	0.842653	0.680349	0.638191	0.698543
23.2	0.464859	0.519764	0.596407	0.616606	0.639702	0.665661	0.835366	0.805025	0.843377	0.693416	0.638444	0.689097
23.2667	0.445539	0.537499	0.563397	0.617024	0.652458	0.675954	0.824747	0.808903	0.835141	0.674798	0.642824	0.67869
23.3333	0.446671	0.519278	0.575067	0.625387	0.651639	0.682562	0.840982	0.792727	0.845109	0.686517	0.647168	0.704808
23.4	0.451826	0.512604	0.591935	0.632616	0.65516	0.694745	0.821272	0.80453	0.845633	0.680562	0.65011	0.676111
23.4667	0.464412	0.52144	0.594407	0.61441	0.646637	0.680605	0.846675	0.800062	0.833107	0.67826	0.649219	0.6665
23.5333	0.458875	0.52836	0.589258	0.637089	0.656505	0.684307	0.830692	0.792477	0.852982	0.673711	0.643031	0.696308
23.6	0.449994	0.51408	0.589249	0.640649	0.645226	0.680776	0.832937	0.797063	0.847018	0.672472	0.66219	0.670462
23.6667	0.445647	0.514619	0.594858	0.61453	0.630244	0.683703	0.795184	0.812322	0.838957	0.679373	0.633954	0.679755
23.7333	0.454766	0.507272	0.572754	0.617836	0.648618	0.681644	0.844137	0.796551	0.812863	0.669425	0.655144	0.671095
23.8	0.457752	0.500133	0.581585	0.6191	0.634337	0.679124	0.816612	0.793465	0.830497	0.69422	0.64638	0.675275
23.8667	0.455538	0.531935	0.600163	0.624882	0.640862	0.676943	0.827676	0.789422	0.864423	0.67292	0.631382	0.675801
23.9333	0.45306	0.503528	0.586132	0.63325	0.645763	0.681878	0.787469	0.794691	0.836411	0.677254	0.644422	0.666457
24	0.458429	0.514354	0.586918	0.626704	0.657244	0.697722	0.817264	0.815332	0.850493	0.68043	0.626614	0.656841
24.0667	0.443122	0.510524	0.581748	0.61722	0.652013	0.701375	0.798219	0.787708	0.850155	0.671633	0.659678	0.656535
24.1333	0.448997	0.511606	0.584091	0.630022	0.653648	0.675187	0.821314	0.797592	0.836607	0.673635	0.627141	0.692274
24.2	0.441944	0.518657	0.590245	0.627349	0.661524	0.670544	0.811813	0.779429	0.827359	0.6722	0.63943	0.657193
24.2667	0.439605	0.50607	0.589192	0.621222	0.647303	0.683866	0.812759	0.796265	0.834565	0.662173	0.647477	0.660885
24.3333	0.453946	0.51355	0.571792	0.632509	0.637461	0.687455	0.81044	0.793687	0.821552	0.676762	0.643252	0.673859
24.4	0.443281	0.522668	0.590058	0.635797	0.628377	0.672425	0.835761	0.797336	0.801978	0.671186	0.665556	0.670903
24.4667	0.458861	0.504283	0.590654	0.627218	0.646383	0.677358	0.815861	0.803063	0.836118	0.676775	0.666158	0.672175
24.5333	0.440644	0.510632	0.600645	0.619692	0.649301	0.670727	0.808024	0.794176	0.842564	0.687616	0.649055	0.672153
24.6	0.455933	0.516351	0.57082	0.623945	0.646335	0.678281	0.814456	0.792664	0.824693	0.674199	0.663432	0.660077
24.6667	0.437787	0.519707	0.585386	0.621246	0.652628	0.686977	0.823901	0.790413	0.822483	0.664891	0.66129	0.66776
24.7333	0.452085	0.516566	0.582276	0.612013	0.639843	0.679816	0.845994	0.801518	0.844899	0.665236	0.639294	0.67511
24.8	0.444525	0.525295	0.573507	0.624851	0.640522	0.704113	0.80652	0.79701	0.819844	0.660339	0.624851	0.659623
24.8667	0.454386	0.507449	0.601067	0.63045	0.652498	0.671071	0.791981	0.797238	0.82943	0.673219	0.643375	0.685197
24.9333	0.449104	0.507411	0.582294	0.619298	0.634938	0.666379	0.811065	0.789182	0.798619	0.669595	0.634866	0.661251
25	0.439282	0.508731	0.570809	0.624669	0.627729	0.68883	0.788207	0.793575	0.825449	0.67454	0.646582	0.644259
25.0667	0.431194	0.523315	0.581114	0.622865	0.639969	0.681639	0.808113	0.781819	0.836707	0.672264	0.631187	0.652298
25.1333	0.445214	0.511245	0.577897	0.610106	0.638527	0.674736	0.793619	0.796495	0.809822	0.654457	0.637534	0.674423
25.2	0.450355	0.506483	0.573772	0.622426	0.652987	0.686566	0.802723	0.798918	0.819501	0.670571	0.624782	0.640538
25.2667	0.443051	0.513223	0.585893	0.621697	0.649968	0.6854	0.800048	0.808032	0.817564	0.677054	0.639928	0.67186
25.3333	0.442002	0.510067	0.573739	0.620514	0.653318	0.67503	0.795753	0.800612	0.796232	0.682856	0.629273	0.666665
25.4	0.447472	0.534332	0.59685	0.619606	0.653944	0.671972	0.796896	0.795078	0.829672	0.655282	0.624891	0.672538
25.4667	0.442466	0.525425	0.573841	0.615422	0.638506	0.686973	0.808675	0.774021	0.808509	0.671991	0.643091	0.651151
25.5333	0.445402	0.519149	0.581324	0.622608	0.634925	0.702693	0.817592	0.783578	0.802913	0.657366	0.624623	0.658614
25.6	0.439085	0.509601	0.567132	0.626206	0.631661	0.692843	0.800748	0.764253	0.830961	0.666741	0.63153	0.661091
25.6667	0.456553	0.504304	0.59565	0.610512	0.640853	0.692528	0.806758	0.781686	0.813667	0.657604	0.630619	0.645011
25.7333	0.443091	0.498948	0.584935	0.617087	0.64019	0.684571	0.821681	0.799181	0.813134	0.643459	0.636979	0.669845
25.8	0.439772	0.508626	0.571787	0.613792	0.643593	0.67201	0.822003	0.776971	0.823848	0.656125	0.626628	0.664253
25.8667	0.453367	0.520588	0.574811	0.623369	0.662129	0.664744	0.780819	0.798566	0.7927	0.655605	0.636595	0.662803
25.9333	0.438477	0.502837	0.578959	0.62119	0.637396	0.681448	0.781109	0.762579	0.805435	0.662332	0.623071	0.661081
26	0.432513	0.513504	0.572877	0.604512	0.633019	0.66528	0.806188	0.771702	0.79108	0.654472	0.63799	0.662171
26.0667	0.432747	0.515902	0.582621	0.61299	0.649853	0.679056	0.800338	0.766905	0.797855	0.660266	0.634671	0.663838
26.1333	0.447317	0.500359	0.590432	0.60697	0.627449	0.675807	0.797249	0.769531	0.808372	0.658805	0.632211	0.657777
26.2	0.455327	0.507443	0.595221	0.623563	0.635744	0.685244	0.775954	0.774798	0.810405	0.650163	0.628492	0.648258
26.2667	0.439812	0.508828	0.598817	0.599477	0.639004	0.68761	0.813677	0.779106	0.798285	0.658423	0.634045	0.658314
26.3333	0.446599	0.502161	0.579667	0.601344	0.639157	0.68654	0.811308	0.766941	0.80586	0.656311	0.639567	0.644996
26.4	0.439041	0.50591	0.579027	0.593185	0.634996	0.693645	0.804295	0.767139	0.809857	0.660408	0.640035	0.661464
26.4667	0.44327	0.519702	0.571925	0.631064	0.639535	0.683247	0.768423	0.771277	0.7912	0.658824	0.630246	0.661451
26.5333	0.43685	0.519719	0.578977	0.622427	0.642853	0.67621	0.795847	0.778282	0.818729	0.660592	0.615657	0.642146
26.6	0.438614	0.510934	0.581094	0.625732	0.631869	0.666674	0.786938	0.789994	0.817774	0.65112	0.620772	0.661845
26.6667	0.43936	0.512932	0.583601	0.601431	0.639545	0.661645	0.78253	0.753589	0.795648	0.66261	0.639546	0.641031
26.7333	0.444206	0.51112	0.589172	0.615161	0.630136	0.683764	0.778951	0.76875	0.79942	0.65097	0.63655	0.649356
26.8	0.442042	0.508956	0.572337	0.595176	0.652157	0.677978	0.792061	0.772253	0.822901	0.668944	0.621904	0.657822
26.8667	0.439727	0.499375	0.572231	0.618331	0.626354	0.672417	0.757158	0.773946	0.798615	0.658113	0.616888	0.644785
26.9333	0.438344	0.502009	0.580926	0.621287	0.63912	0.683647	0.784583	0.760554	0.800376	0.638749	0.6202	0.643676
27	0.436704	0.501784	0.570805	0.605951	0.620782	0.661341	0.778284	0.779973	0.802275	0.651367	0.614777	0.650819
27.0667	0.443854	0.51782	0.574254	0.612752	0.633407	0.679559	0.779547	0.767121	0.789797	0.657553	0.634738	0.645244
27.1333	0.438134	0.510398	0.569751	0.610934	0.620788	0.664047	0.797041	0.775011	0.798181	0.649625	0.624541	0.653514
27.2	0.427822	0.494683	0.575615	0.620354	0.620583	0.677646	0.769149	0.789919	0.76842	0.656619	0.624318	0.66503
27.2667	0.435465	0.508901	0.582069	0.613658	0.63643	0.684639	0.794557	0.763279	0.776625	0.643424	0.625999	0.637885
27.3333	0.435561	0.501757	0.573579	0.619835	0.640316	0.685118	0.775846	0.771907	0.801235	0.653563	0.626931	0.646266
27.4	0.437306	0.504418	0.578509	0.602776	0.633592	0.671408	0.791015	0.769698	0.795453	0.634857	0.604495	0.642106
27.4667	0.437833	0.493346	0.577683	0.618075	0.628634	0.67139	0.767764	0.746059	0.798529	0.63267	0.617283	0.643101
27.5333	0.440137	0.507795	0.574298	0.615428	0.627418	0.670884	0.783947	0.769091	0.790904	0.638911	0.616534	0.633453
27.6	0.430667	0.514577	0.577245	0.599104	0.62587	0.669953	0.764713	0.752442	0.786061	0.650641	0.619518	0.644649
27.6667	0.429984	0.505474	0.575618	0.609383	0.641216	0.672979	0.770288	0.747568	0.798382	0.640854	0.628481	0.663893
27.7333	0.432154	0.521141	0.579206	0.618948	0.635942	0.664358	0.764135	0.739942	0.801951	0.662512	0.607472	0.63555
27.8	0.434093	0.502939	0.573804	0.621385	0.625392	0.6694	0.750872	0.756176	0.791532	0.639143	0.614796	0.641432
27.8667	0.456319	0.502699	0.566135	0.606482	0.624585	0.66525	0.762629	0.75982	0.795878	0.656136	0.607741	0.638452
27.9333	0.439014	0.502275	0.571276	0.595232	0.626881	0.666977	0.774467	0.764311	0.8066	0.633437	0.609669	0.644964
28	0.423872	0.501959	0.573951	0.605494	0.639414	0.69784	0.767188	0.754431	0.788984	0.638712	0.615208	0.65765
28.0667	0.438251	0.497524	0.591885	0.604001	0.614615	0.66991	0.751446	0.775616	0.806396	0.651856	0.60734	0.647501
28.1333	0.430223	0.50116	0.565539	0.600908	0.628707	0.6917	0.76075	0.754102	0.792292	0.634258	0.609587	0.632951
28.2	0.430943	0.502951	0.566755	0.619498	0.63749	0.673058	0.760252	0.756611	0.801594	0.637965	0.60977	0.632739
28.2667	0.435064	0.503145	0.562486	0.600789	0.631797	0.681327	0.767529	0.744312	0.795407	0.640467	0.612461	0.649509
28.3333	0.444601	0.51186	0.580341	0.604908	0.621669	0.657946	0.768081	0.752512	0.773722	0.635075	0.620272	0.649205
28.4	0.445582	0.499017	0.570235	0.596727	0.632161	0.686942	0.769525	0.756283	0.781872	0.627344	0.611604	0.638227
28.4667	0.436024	0.498104	0.563158	0.619407	0.630781	0.684281	0.751162	0.763404	0.796516	0.631198	0.597344	0.634126
28.5333	0.436673	0.492395	0.56515	0.598421	0.633816	0.659775	0.744257	0.761839	0.782374	0.648572	0.601868	0.640347
28.6	0.433947	0.507193	0.574347	0.606246	0.629307	0.677859	0.758436	0.755183	0.801013	0.629556	0.596344	0.659836
28.6667	0.429073	0.501159	0.568759	0.608181	0.629576	0.677044	0.774459	0.752253	0.781223	0.633452	0.611131	0.625846
28.7333	0.432321	0.509022	0.568204	0.614422	0.629032	0.666232	0.743449	0.744423	0.793186	0.627296	0.603819	0.618167
28.8	0.43372	0.497273	0.570881	0.608672	0.613473	0.66895	0.762963	0.751859	0.803355	0.624311	0.609357	0.633536
28.8667	0.439965	0.505391	0.557581	0.592668	0.623986	0.673202	0.767992	0.75677	0.775933	0.628743	0.613452	0.645059
28.9333	0.433787	0.513749	0.56647	0.60083	0.635208	0.672708	0.749285	0.748365	0.77651	0.626576	0.602314	0.62894
29	0.432853	0.493327	0.569947	0.605097	0.623281	0.680869	0.756594	0.768694	0.763194	0.641609	0.607386	0.619795
29.0667	0.433108	0.509712	0.575267	0.589311	0.615537	0.670049	0.767604	0.745481	0.793997	0.638791	0.623716	0.627824
29.1333	0.430511	0.498594	0.57534	0.605129	0.623633	0.665599	0.745968	0.72589	0.760003	0.632549	0.606549	0.648453
29.2	0.429157	0.493953	0.564073	0.611782	0.629567	0.661871	0.734868	0.746815	0.776087	0.624037	0.600093	0.620014
29.2667	0.429683	0.502012	0.565392	0.588363	0.624292	0.661047	0.747243	0.726767	0.778404	0.615947	0.612645	0.636805
29.3333	0.4317	0.494229	0.55916	0.598787	0.630698	0.65973	0.739117	0.736269	0.77707	0.620852	0.596078	0.626485
29.4	0.429513	0.488247	0.577489	0.592781	0.631746	0.657171	0.754963	0.743689	0.767809	0.616106	0.622488	0.646486
29.4667	0.430178	0.499214	0.573069	0.610635	0.615467	0.674192	0.752649	0.747805	0.776767	0.613124	0.596664	0.620136
29.5333	0.422006	0.500487	0.56983	0.59828	0.639991	0.680618	0.741432	0.744851	0.78904	0.631599	0.604872	0.624262
29.6	0.438692	0.490644	0.563523	0.594518	0.63018	0.664892	0.748238	0.730233	0.772205	0.623169	0.60532	0.639173
29.6667	0.42967	0.497068	0.573956	0.607313	0.617233	0.664669	0.751689	0.729234	0.754864	0.627169	0.591699	0.636619
29.7333	0.428207	0.502348	0.556634	0.587676	0.643627	0.66757	0.749841	0.742342	0.793276	0.62846	0.588257	0.635664
29.8	0.427451	0.496998	0.575991	0.581209	0.616457	0.645138	0.734466	0.722878	0.775166	0.632928	0.610547	0.63661
29.8667	0.42807	0.493343	0.563244	0.608607	0.620127	0.666952	0.76346	0.735488	0.766986	0.62638	0.603574	0.632349
29.9333	0.428986	0.489407	0.556227	0.605581	0.623936	0.670758	0.748184	0.766301	0.787114	0.616556	0.593815	0.637053
30	0.416713	0.489764	0.560178	0.603672	0.624796	0.673819	0.755204	0.749612	0.782612	0.633181	0.614516	0.612727
