# Supplementary material for: Towards a molecular mechanism underlying mitochondrial protein import through the TOM and TIM23 complexes
Source: eLife journal article supplement (doi:10.7554/elife.75426), 2022-06-08
Supplement: supp [file Figure 1 - figure supplement 1 - source data 4.xlsx]

## Sheet: band densitometry
digitonin (mg/ml)	pellet/supernatant	GR band density	TIM10 band density	proportion of total GR that is in supernatant	proportion of total TIM10 that is in supernatant
0	pellet	0.0207799	0.133113
1	pellet	0.0276686	0.148841
2	pellet	0.0228563	0.0599694
3	pellet	0.0174032	0.0404069
4	pellet	0.0177878	0.0421522
5	pellet	0.012766	0.0427911
0	supernatant	0.000154704	0.026098	0.00738986	0.163921
1	supernatant	0.000702024	0.0591527	0.0247448	0.284396
2	supernatant	0.00277656	0.172055	0.10832	0.741538
3	supernatant	0.0108128	0.186975	0.383216	0.822295
4	supernatant	0.0155847	0.227579	0.466993	0.843726
5	supernatant	0.0219541	0.201561	0.632317	0.824879

## Sheet: luminescence data
dig (mg/ml)	0	1	2	3	4	5
time (sec)
0	25480	20530	20740	18890	22980	18880
6	24870	20290	20210	17640	23790	18730
12	25870	18980	21230	18160	22790	19510
18	24820	19290	22710	17450	24140	17550
24	25310	19760	21070	17320	22840	18860
43	2946250	2740840	3343170	4572650	5348760	6079910
49	3015460	2811550	3441060	4747910	5502900	6273980
55	3085810	2880980	3550110	4857890	5709230	6441770
61	3141830	2935280	3651510	4996360	5828920	6613110
67	3198500	2968040	3731100	5085800	5978240	6772930
73	3238770	3030410	3787510	5214140	6076840	6895290
79	3277580	3085370	3871110	5271880	6209620	7042840
85	3318870	3120950	3923050	5367020	6284230	7174080
91	3374140	3140370	3964180	5452750	6398390	7273500
97	3407840	3206100	4029190	5532900	6483550	7357450
103	3429270	3233870	4064000	5568340	6556550	7440810
109	3479400	3260130	4126460	5639790	6644760	7533360
115	3495640	3267150	4190870	5697890	6722030	7637530
121	3530740	3301490	4221200	5778430	6788210	7688460
127	3567670	3333040	4241200	5830160	6831660	7759140
133	3603700	3353070	4268280	5849080	6898320	7829090
139	3608500	3384020	4315790	5913290	6976210	7898890
145	3657190	3384340	4350440	5962270	7039240	7932470
151	3677650	3409900	4380360	5990920	7081960	8008390
157	3688520	3431770	4411370	6052970	7102980	8060210
163	3713110	3454670	4419370	6075750	7151650	8079170
169	3751660	3471300	4464980	6124200	7228870	8129090
175	3764870	3480390	4461160	6146950	7224800	8189190
181	3780380	3509190	4513280	6175710	7292070	8207640
187	3791170	3525400	4528520	6212450	7327230	8249000
193	3813060	3546650	4546710	6219840	7357830	8257440
199	3835850	3544530	4565510	6233010	7382230	8317440
205	3869600	3571250	4566320	6286250	7421860	8342450
211	3867070	3563740	4609310	6327960	7441270	8370470
217	3901900	3563270	4624130	6333640	7477470	8367910
223	3902920	3584060	4622370	6365030	7511140	8404950
229	3925120	3592840	4641060	6371940	7515050	8431110
235	3935240	3605120	4672450	6369990	7529510	8432650
241	3947430	3624290	4690670	6389440	7573390	8454340
247	3954640	3619920	4694820	6412220	7568430	8454650
253	3976610	3637840	4686890	6423260	7605000	8508470
259	4005750	3656480	4709980	6428360	7632800	8497310
265	4024940	3647730	4731250	6456010	7642370	8553930
271	4024420	3668080	4728160	6461010	7671460	8554960
277	4019730	3688820	4738050	6458310	7669970	8543250
283	4057950	3680730	4738110	6469950	7672230	8559170
289	4046220	3697240	4760010	6489310	7709890	8566900
295	4066200	3693930	4759380	6502500	7718040	8574770
301	4076630	3677100	4761300	6485560	7721750	8562880
307	4092220	3704460	4779630	6511330	7727990	8594810
313	4089730	3697710	4798990	6525220	7732510	8574050
319	4093880	3711680	4796250	6511260	7731100	8568020
325	4109000	3718240	4809900	6508910	7766670	8567790
331	4108960	3731670	4788430	6538760	7755100	8563100
337	4110290	3728330	4781760	6524500	7769910	8588770
343	4137780	3735820	4818570	6534820	7785230	8571130
349	4124280	3737710	4790010	6552590	7753630	8594870
355	4153350	3732980	4825010	6564780	7793320	8571950
361	4151690	3749910	4824830	6533480	7786240	8580140
367	4163950	3745510	4828840	6520050	7778170	8581910
373	4163540	3733650	4828080	6543060	7778970	8573870
379	4166130	3751410	4832360	6538850	7794850	8567810
385	4174620	3762520	4827580	6539330	7782410	8553370
391	4190760	3749060	4823320	6549680	7788240	8562270
397	4176680	3750510	4821480	6545080	7766030	8574080
403	4182750	3751640	4835850	6530930	7780680	8567720
409	4221230	3758500	4837120	6535920	7768360	8544050
415	4205310	3767160	4835300	6534530	7757390	8542980
421	4206250	3757390	4844960	6542600	7796300	8545090
427	4213680	3758150	4824600	6537560	7774570	8535460
433	4236130	3756430	4849620	6523330	7780180	8514310
439	4212960	3765620	4834700	6515750	7768740	8498990
445	4228810	3750340	4829090	6535010	7757430	8513120
451	4235890	3765000	4834390	6526640	7757160	8498300
457	4241810	3759040	4825290	6521480	7729910	8457050
463	4239790	3766070	4836070	6536260	7751810	8499380
469	4232550	3768220	4826810	6519300	7734980	8462810
475	4242190	3774120	4847310	6487820	7726630	8453740
481	4240490	3761800	4855210	6524750	7710150	8434930
487	4242190	3764690	4818200	6480510	7719670	8433440
493	4249110	3767240	4828810	6485410	7709100	8444140
499	4270650	3762880	4841690	6514060	7719610	8393390
505	4263830	3770550	4810910	6487830	7701190	8415750
511	4259900	3763010	4818140	6460790	7683820	8383590
517	4270590	3760210	4816630	6461580	7700220	8371690
523	4255890	3771490	4830440	6462150	7689670	8342660
529	4250210	3771340	4829890	6446790	7678500	8361940
535	4241430	3778210	4838970	6449470	7642310	8330710
541	4266610	3766710	4803690	6441500	7683810	8313320
547	4272500	3773900	4802800	6425330	7656270	8316610
553	4266030	3750430	4833400	6445150	7647890	8310330
559	4273380	3765430	4809000	6407090	7643040	8293120
565	4253710	3758640	4798380	6417930	7621820	8279780
571	4264590	3755160	4821600	6392550	7622850	8253060
577	4245830	3754110	4793940	6378570	7617240	8239590
583	4258700	3744490	4789180	6398290	7599550	8239180
589	4261960	3748970	4792250	6363870	7611410	8212330
595	4272110	3749340	4794550	6362980	7585050	8191650
601	4265580	3749360	4783600	6365120	7572010	8187740
607	4284050	3739680	4789430	6346060	7557380	8164230
613	4269540	3753430	4786500	6345080	7569460	8144920
619	4256400	3738150	4788150	6357040	7538140	8164770
625	4249530	3737570	4774280	6327770	7522240	8139320
631	4264380	3737370	4778920	6317870	7516300	8128070
637	4259530	3747040	4762930	6312770	7484880	8084410
643	4273080	3718350	4765110	6303520	7499570	8065690
649	4266370	3746400	4755180	6308340	7478760	8065620
655	4272200	3728450	4746260	6276380	7460270	8022650
661	4256030	3724750	4754010	6301550	7460350	8039080
667	4261580	3724820	4727090	6268210	7432320	8014650
673	4251870	3712140	4755730	6271570	7395890	8011910
679	4255940	3702990	4729270	6245800	7430990	7971160
685	4261440	3717170	4724420	6224370	7434980	7961710
691	4243740	3708600	4703180	6224930	7407410	7938740
697	4251180	3690480	4731450	6220390	7415120	7933780
703	4255440	3706610	4710500	6229420	7374990	7920400
709	4226520	3719230	4705630	6196000	7329710	7899370
715	4241510	3701190	4706200	6194230	7339860	7898010
721	4243560	3696090	4680920	6172940	7338040	7853120
727	4233200	3702620	4680570	6162190	7322420	7848080
733	4233440	3681460	4682680	6161800	7310390	7818750
739	4241950	3692960	4685510	6135350	7301940	7825000
745	4233650	3683990	4674430	6161500	7276320	7788910
751	4232830	3686280	4665300	6126120	7253070	7773040
757	4247470	3677900	4664140	6108580	7249410	7756480
763	4210270	3677920	4657570	6123400	7225510	7725530
769	4239730	3679370	4639200	6094520	7225490	7746490
775	4236370	3668980	4619210	6065150	7207700	7706760
781	4203660	3661380	4644530	6070800	7179440	7683860
787	4211250	3669310	4615860	6059520	7172700	7678230
793	4212320	3661110	4655790	6057050	7157760	7645590
799	4207170	3649530	4627000	6042520	7144770	7611660
805	4211600	3667530	4598890	6025750	7115370	7636630
811	4203430	3650030	4616190	5995330	7138460	7583150
817	4203720	3641830	4625740	6022020	7096560	7600590
823	4196610	3631940	4590530	5964780	7060700	7569640
829	4190990	3646360	4597870	5970930	7063720	7529600
835	4196400	3627870	4581990	5974710	7052620	7515850
841	4202450	3635530	4577040	5956200	7058580	7490340
847	4192800	3634550	4564390	5952710	7016770	7478090
853	4187060	3621390	4576580	5919750	6992720	7450170
859	4179030	3620620	4530010	5951540	7014980	7444900
865	4167700	3615080	4527230	5903850	6977840	7424450
871	4167370	3607010	4544520	5883560	6989320	7394480
877	4167520	3610100	4526300	5865290	6926940	7396640
883	4159750	3612720	4522090	5859830	6917620	7364940
889	4161290	3596900	4527740	5871420	6946490	7360080
895	4173110	3604220	4511740	5823460	6908470	7331280
901	4164160	3587980	4499340	5837530	6909000	7312000
907	4133620	3573900	4481460	5818740	6879680	7270730
913	4152450	3584080	4507670	5793110	6845240	7267320
919	4147250	3575990	4500280	5802130	6841220	7248190
925	4130120	3563080	4468010	5792160	6862540	7253670
931	4123110	3582410	4465070	5786120	6826920	7226610
937	4143920	3556850	4465450	5772110	6787170	7208360
943	4097020	3549820	4470440	5758350	6789620	7189840
949	4133180	3548310	4462740	5744560	6769650	7177110
955	4123350	3554870	4466850	5743240	6773450	7140550
961	4110120	3532700	4435420	5730040	6748360	7116640
967	4118060	3553790	4426210	5717090	6734120	7109800
973	4103360	3527760	4425260	5710320	6718940	7090570
979	4093980	3529800	4416370	5676150	6690640	7070880
985	4082850	3529510	4411640	5674340	6661780	7044890
991	4103060	3526220	4390820	5650750	6656320	7037460
997	4106230	3524450	4400510	5638850	6629370	7006660
1003	4085910	3501900	4376500	5627730	6640680	7004950
1009	4088180	3512950	4369540	5628270	6618140	6991390
1015	4083990	3500590	4373960	5596780	6615320	6963050
1021	4062430	3480380	4364180	5587490	6605520	6944260
1027	4069790	3490970	4375100	5560530	6576810	6928730
1033	4049990	3488700	4362530	5566880	6571530	6938510
1039	4070190	3484900	4333940	5571510	6530980	6880680
1045	4072010	3487670	4324790	5550820	6507500	6876090
1051	4060940	3477880	4341130	5524910	6496480	6830300
1057	4046430	3468130	4320790	5521960	6496740	6821600
1063	4037720	3453440	4310020	5512980	6473850	6817520
1069	4036680	3457790	4295020	5506470	6471360	6796080
1075	4025130	3452450	4303880	5488900	6422170	6768400
1081	4027040	3454910	4294390	5473110	6436660	6776050
1087	4006620	3449100	4289920	5459760	6428770	6767700
1093	4026940	3451530	4277400	5461470	6374930	6722800
1099	4001210	3425710	4271760	5433990	6407650	6718370
1105	3994230	3418350	4253490	5417360	6349280	6691360
1111	3991440	3425230	4273950	5399850	6360330	6658900
1117	4006380	3424890	4235760	5410330	6345590	6655600
1123	4000700	3406850	4252610	5396510	6355430	6627130
1129	3985300	3409890	4238470	5373930	6314070	6620750
1135	3986980	3425120	4227590	5369540	6292130	6604200
1141	3982700	3394330	4230780	5336960	6272870	6589370
1147	3974630	3394240	4205500	5344370	6275940	6573470
1153	3952100	3399950	4176750	5316920	6246580	6573620
1159	3955440	3400390	4178980	5319150	6222330	6515240
1165	3966570	3384240	4182150	5295880	6223120	6508560
1171	3949750	3372510	4159560	5312830	6182990	6500340
1177	3967570	3376830	4171150	5270310	6191410	6460590
1183	3948060	3363410	4177370	5264300	6152610	6432560
1189	3947150	3366850	4131990	5253370	6135600	6433990
1195	3929390	3365500	4152890	5224690	6113300	6406840
1201	3939030	3326670	4152520	5217580	6131290	6395010
1207	3923860	3350470	4124440	5223940	6114950	6380100
1213	3921380	3359410	4101000	5207040	6079260	6343540
1219	3926430	3328760	4107760	5178740	6063700	6366710
1225	3896590	3324810	4109680	5172750	6072440	6319820
1231	3909190	3329500	4083900	5159440	6032870	6324600
1237	3918990	3335810	4094730	5146710	6013280	6289040
1243	3899980	3310060	4085870	5142360	6008700	6262540
1249	3881700	3297750	4084880	5120640	5986180	6282380
1255	3889780	3297130	4059490	5113830	5980860	6256560
1261	3876000	3308070	4046730	5086280	5977850	6215810
1267	3893310	3301040	4042750	5094750	5945950	6188530
1273	3862910	3289290	4034250	5063780	5921100	6198230
1279	3870120	3294760	4029140	5078860	5922050	6146910
1285	3857010	3268340	4016520	5038130	5883530	6148920
1291	3865420	3282500	4013360	5050750	5865900	6149930
1297	3864830	3294950	4000640	5035680	5870260	6124240
1303	3822640	3258400	3992180	5013960	5847150	6116530
1309	3827680	3263040	3982010	4993860	5847930	6103080
1315	3839550	3249410	3991940	4988550	5812980	6082910
1321	3840100	3243870	3975750	4986410	5815400	6035170
1327	3825130	3242800	3962270	4956100	5802940	6033820
1333	3834390	3248340	3944070	4950980	5810740	6020670
1339	3798660	3219550	3966430	4939530	5761590	6008440
1345	3800210	3237720	3929370	4952250	5746560	5982090
1351	3805960	3221480	3927660	4924940	5723530	5978310
1357	3794140	3220010	3931450	4888820	5702230	5938220
1363	3796080	3210460	3923300	4903070	5693890	5942170
1369	3799740	3203650	3928090	4862380	5665230	5933270
1375	3771850	3207080	3907530	4873000	5669750	5888780
1381	3783730	3200710	3907730	4861040	5651730	5872190
1387	3780900	3194300	3884240	4837150	5648250	5857850
1393	3764820	3186670	3878270	4846070	5618520	5848020
1399	3758340	3198930	3872480	4826790	5595880	5831660
1405	3763660	3167460	3867710	4820690	5592370	5807980
1411	3764750	3175570	3856240	4809520	5563040	5827020
1417	3745060	3185320	3840990	4791280	5578700	5794940
1423	3719040	3172150	3841350	4774030	5544370	5778590
1429	3751530	3147200	3824050	4746750	5503320	5750200
1435	3719780	3142620	3824850	4739450	5516850	5717860
1441	3733850	3161100	3807290	4743830	5486320	5711650
1447	3729990	3158900	3807850	4735470	5489810	5719010
1453	3710870	3136600	3787290	4691370	5464830	5702060
1459	3712970	3147300	3811030	4704840	5461810	5701190
1465	3718400	3120870	3798220	4687300	5431080	5660910
1471	3697940	3127370	3776460	4670360	5426590	5650570
1477	3696190	3095880	3771320	4655800	5424240	5605380
1483	3687420	3097120	3751130	4641080	5375330	5601840
1489	3683440	3083570	3740520	4636690	5378870	5585790
1495	3677960	3090240	3759550	4625210	5363020	5587190
1501	3666680	3097970	3724280	4615850	5346470	5558810
1507	3662170	3085200	3727100	4575130	5353310	5531220
1513	3656990	3088720	3715840	4597080	5326050	5533940
1519	3645080	3097900	3707080	4559660	5282420	5499780
1525	3641620	3083950	3691070	4574860	5287760	5501140
1531	3645870	3061600	3697430	4559000	5273280	5478750
1537	3638680	3066580	3689660	4545600	5263680	5466040
1543	3623210	3071260	3675100	4541670	5255460	5451950
1549	3647430	3056940	3664470	4520300	5223310	5430070
1555	3615340	3062960	3665710	4515050	5208220	5412950
1561	3607990	3056420	3660500	4502270	5187900	5400250
1567	3600850	3044840	3638360	4471930	5201580	5373330
1573	3587550	3037590	3651330	4469210	5181290	5379760
1579	3610690	3026970	3650500	4458690	5182300	5348710
1585	3592330	3019480	3647010	4453510	5132000	5338580
1591	3591920	3019190	3599990	4455590	5119010	5332920
1597	3588000	3013610	3624060	4415830	5109880	5306630
1603	3578710	3015610	3619600	4427330	5095280	5292190
1609	3570020	2999450	3606420	4417010	5081290	5263830
1615	3566550	2993230	3576940	4391800	5071760	5257190
1621	3551480	2995180	3574500	4380580	5045230	5245320
1627	3548460	3000360	3567210	4380660	5062670	5219310
1633	3536230	2982950	3562580	4358660	5033160	5209670
1639	3537660	2952890	3552450	4351650	5030500	5200270
1645	3533330	2973450	3539070	4339500	5007420	5162840
1651	3545870	2972850	3542000	4331930	4982250	5176410
1657	3546570	2973130	3539550	4329090	4982250	5178830
1663	3518010	2968010	3531810	4300880	4960340	5145700
1669	3525610	2947740	3500450	4297070	4953980	5134140
1675	3497960	2945620	3506680	4287280	4944130	5121150
1681	3501000	2959500	3491250	4263620	4912090	5092020
1687	3499760	2940060	3492560	4269320	4893900	5091160
1693	3502570	2944070	3484170	4232980	4888290	5058490
1699	3486990	2924220	3469850	4256050	4863920	5050900
1705	3460100	2919070	3488620	4215030	4864740	5024380
1711	3464480	2911820	3464490	4205050	4852970	5012380
1717	3464490	2917250	3446980	4199310	4845410	5002570
1723	3458640	2911920	3455520	4200800	4813200	4995710
1729	3467350	2911850	3422020	4189940	4790090	4994560
1735	3455190	2894800	3432770	4161970	4777490	4971970
1741	3452020	2902800	3412240	4165200	4769850	4937530
1747	3460110	2895130	3431980	4139180	4758150	4935630
1753	3428130	2874470	3412690	4120600	4753810	4914110
1759	3427080	2879080	3382780	4134060	4730990	4906410
1765	3414150	2875970	3384700	4112580	4731240	4890060
1771	3402500	2870930	3386180	4111180	4704840	4876620
1777	3409120	2849190	3392230	4097140	4692970	4848510
1783	3404600	2859470	3375300	4092690	4671050	4848500
1789	3401960	2847020	3360080	4067960	4674450	4849330
1795	3401120	2839780	3354110	4082460	4662310	4826400
1801	3390350	2843870	3353530	4055150	4631520	4800340
1807	3390460	2847700	3329730	4047540	4626650	4780790
1813	3380830	2840850	3337880	4034760	4603910	4793810
1819	3378410	2827130	3313750	4005230	4582010	4756700
1825	3364380	2820300	3318650	3996580	4588410	4728340
1831	3373200	2808560	3315190	3997820	4560030	4744380
1837	3355690	2814110	3311270	3983040	4567800	4732240

## Sheet: secondary data (amplitudes)
digitonin (mg/ml)	amplitude
0	1
1	0.881925
2	1.13332
3	1.53238
4	1.81984
5	2.00625
