# Supplementary figures and images for: Towards a molecular mechanism underlying mitochondrial protein import through the TOM and TIM23 complexes
Source: eLife journal article supplement (doi:10.7554/elife.75426), 2022-06-08

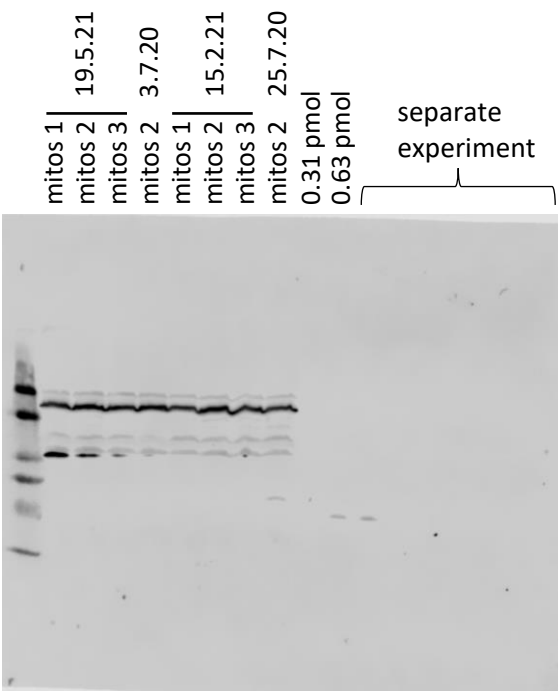

short exposure

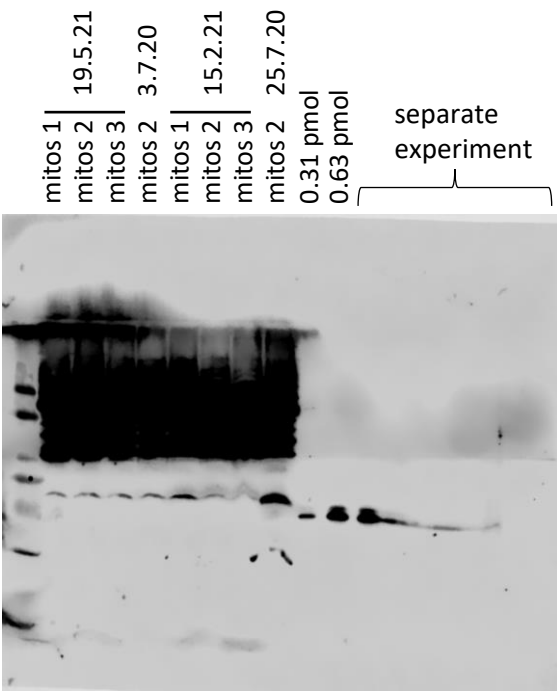

long exposure

Supplement: supp [file elife-75426-supp-v1.zip]

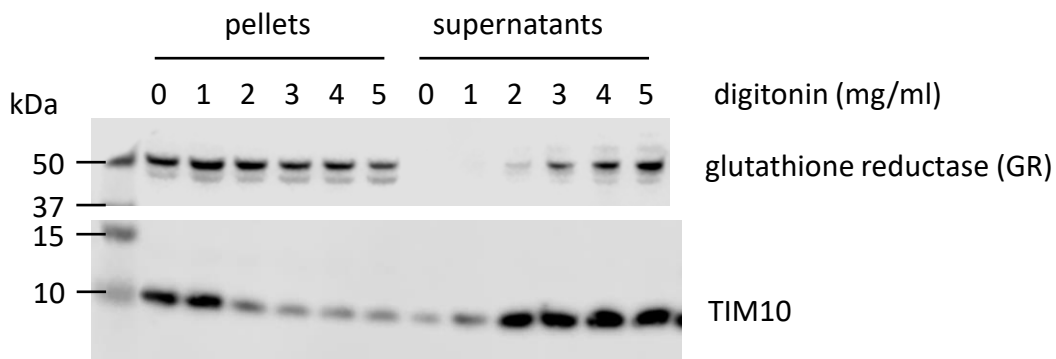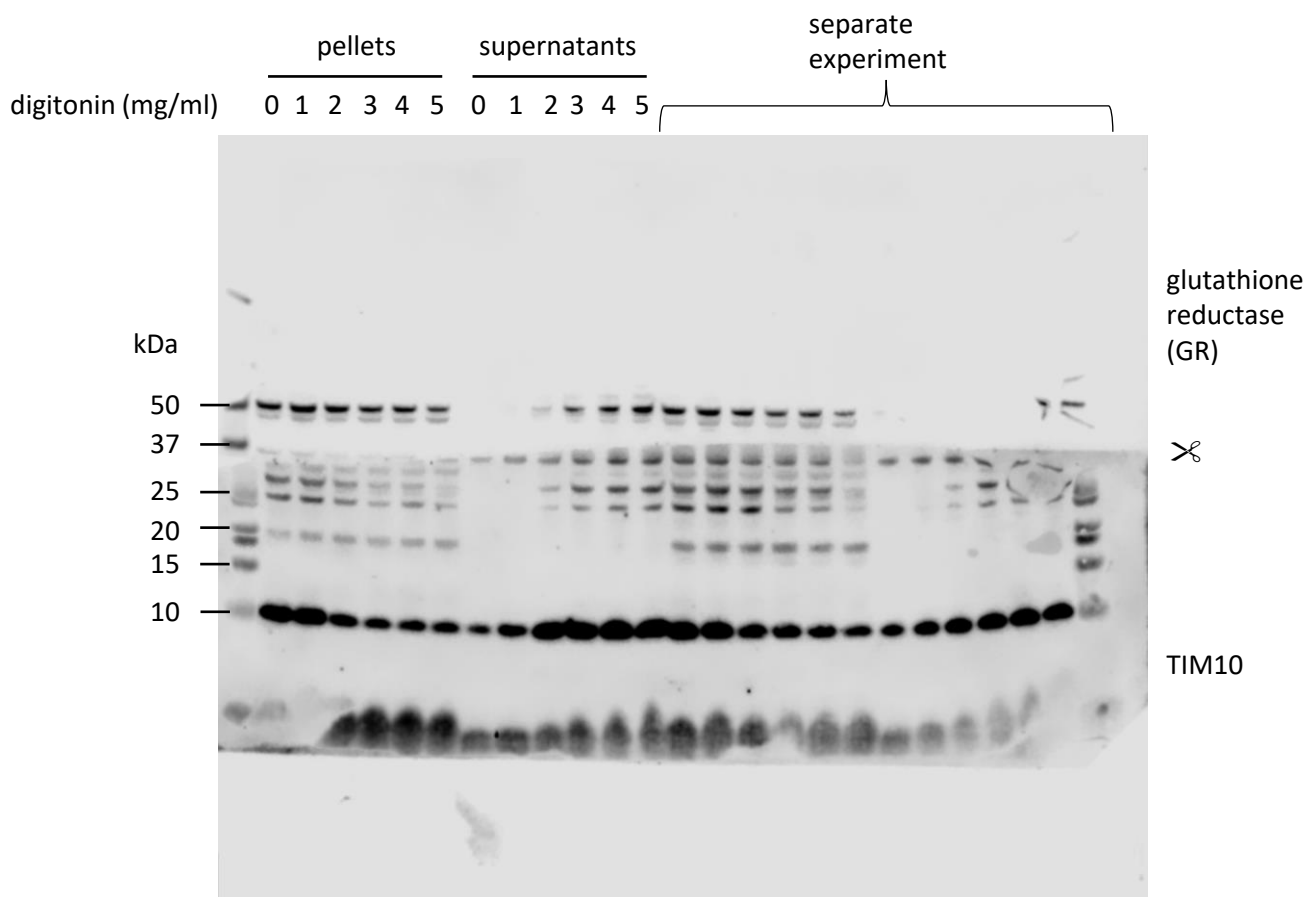

Supplement: supp [file elife-75426-supp-v1.zip]
